# Supplementary material for: Real-time transcriptomic profiling in distinct experimental conditions
Source: eLife. 2026 May 5;13:RP98768. doi: 10.7554/eLife.98768 (PMC13143281; doi:10.7554/eLife.98768)
Supplement: Figure 2—source data 1. [file elife-98768-fig2-data1.xlsx]

## Sheet: General_Sequencing_HEK_HeLa
Source Data 1. General sequencing overview of HEK293 and HeLa (2 rep (A) and 10 rep (B) per condition (PromethION)). Total reads per time point was obtained via MinKnow software (ONT) while mapped reads, gene counts, and transcript counts was obtained from NanopoReaTA.
A. 2 replicates per condition
			Total reads					Mapped reads					Gene counts					Transcript counts
Sample	Replicates	Barcode #	1hr	2hr	5hr	10hr	24hr	1hr	2hr	5hr	10hr	24hr	1hr	2hr	5hr	10hr	24hr	1hr	2hr	5hr	10hr	24hr
HEK293	R1	1	57081	123244	311003	505686	1199688	43964	75936	267804	437303	1077558	4141	6756	21158	32871	72677	25034	44254	164381	139001	690590
	R2	2	70306	152911	389124	633320	1504285	55956	87925	335758	547196	1348972	4633	6984	23729	36971	82197	30478	48996	106431	168423	836333
HeLa	R1	3	206622	420510	962751	1482520	3141151	167910	275867	827658	1276669	2799758	8101	12786	35939	54683	115755	23163	38450	120781	191489	441904
	R2	4	212245	439292	1023714	1586757	3406191	175920	251886	887630	1380052	3066311	9609	13462	43945	67007	142858	29749	43206	159461	254132	594903
B. 10 replicates per condition
			Total reads					Mapped reads					Gene counts					Transcript counts
Sample	Replicates	Barcode #	1hr	2hr	5hr	10hr	24hr	1hr	2hr	5hr	10hr	24hr	1hr	2hr	5hr	10hr	24hr	1hr	2hr	5hr	10hr	24hr
HEK293	R1	1	N/A	91370	N/A	417590	907180	32124	55871	166837	321302	633144	6127	10612	30990	58523	115822	14045	24647	75005	145263	287743
	R2	2		145900		700040	1534760	40440	89977	293600	566267	1095409	7816	16994	54370	104215	201376	18299	41050	135589	263139	509722
	R3	3		80470		363050	787050	22588	54346	154733	281564	529988	4118	9753	27377	49483	93072	9664	23542	67979	124596	235463
	R4	4		99920		477920	1045790	36371	63413	207160	377048	723287	6883	11749	37492	68003	130494	16606	28894	96207	176734	339651
	R5	5		98840		456070	991790	26900	52155	190404	342050	637744	4738	9121	32128	57240	106700	11916	23298	86267	155890	292153
	R6	6		142030		661680	1445120	38787	96308	280899	501452	954238	7290	17676	50430	89582	170198	17513	43730	129652	233096	444062
	R7	7		95130		445680	971310	26805	65264	181601	339193	647986	5109	12401	33881	62870	119917	12292	30285	85184	160224	306135
	R8	8		92980		431940	939730	33261	57897	185494	341668	644934	5846	10121	31499	57373	108293	14357	25132	81971	152382	287934
	R9	9		99270		464290	1013040	35352	49496	190930	361598	709354	6748	9268	35114	66188	129566	16351	22901	90064	172008	338572
	R10	10		106780		490030	1067800	28471	69751	202273	373886	690075	5353	12781	36420	66395	121973	13011	32226	95436	177444	328722
HeLa	R1	11		94290		441990	964380	34043	64961	185655	335929	635732	6290	11708	32848	59192	112147	14525	27740	80534	147318	279887
	R2	12		114610		544600	1193790	41161	79924	223104	430454	812609	7712	14697	39681	76029	142793	17776	34415	96620	188296	356706
	R3	13		97710		458910	1003230	35874	69769	201645	369525	735261	5910	11426	32347	58514	115965	15217	30176	88512	162908	324273
	R4	14		96870		445800	967890	34568	67431	193782	358453	715183	5143	9613	26714	48799	97412	13490	26225	76857	143430	287342
	R5	15		107400		495550	1076970	37364	67677	209023	375051	748408	5408	9686	28851	50830	101048	14751	26855	84347	152824	304538
	R6	16		102040		477200	1.04058e+06	29009	44299	206301	383775	713642	4344	6508	29515	54431	100914	11097	17053	80717	151520	282501
	R7	17		79290		362100	787610	22400	48530	148451	278005	527215	3509	7526	22262	41099	77612	9001	19676	61463	115876	220617
	R8	18		113170		527340	1150430	39473	76978	214473	407087	756730	6313	12060	32951	61519	114104	16721	32722	92718	177418	330775
	R9	19		103020		484730	1060470	29430	64829	200768	354027	735803	4602	9713	29353	51310	106311	12550	27612	87098	154810	322906
	R10	20		174280		833320	1822960	62625	122679	346407	656060	1251415	9493	18378	50966	95734	182209	26521	52254	149723	286182	546716

## Sheet: PromethION_10R_DEG_DET_HEK_HeLa
Differentially expressed genes (left) and transcripts (right) in HEK293 vs HeLa, per each time point (PromethION). Data was collected 1-hour, 2-hours, 5hours, 10-hours and 24-hours post-sequencing initiation. The same time points for DEGs and DETs are shown in the same row.
Differential Gene expression											Differential Transcript expression
1 hour post-sequencing initiation											1 hour post-sequencing initiation													1hr	2hr	5hr	10hr	24
gene name	gene base mean	log 2 fold change	lfcSE	stat	p-value	p-adjusted	significance	significance_reg	gene ID		transcript name	transcript base mean	log 2 fold change	lfcSE	stat	p-value	p-adjusted	significance	significance_reg	gene ID		DGE	UP	23	116	604	1245	2036
XIST	4.3227	5.15154	0.682066	7.55285	4.25826e-14	2.35567e-10	TRUE	UP	ENSG00000229807.13		XIST-204	6.83636	5.76943	0.670026	8.61076	7.25805e-18	7.54305e-14	TRUE	UP	ENST00000429829.6			DOWN	35	105	399	782	1399
IRS4	2.58488	4.41937	0.707826	6.24358	4.27675e-10	4.7318e-07	TRUE	UP	ENSG00000133124.12		NEFL-201	3.74082	5.19671	0.685931	7.57614	3.55992e-14	2.77478e-10	TRUE	UP	ENST00000610854.2				58	221	1003	2027	3435
ZNF503	1.37857	4.06564	0.770888	5.27396	1.33508e-07	8.689e-05	TRUE	UP	ENSG00000165655.17		XIST-223	1.82908	4.44342	0.746816	5.94982	2.68443e-09	5.57967e-06	TRUE	UP	ENST00000650366.1		DTE	UP	24	65	469	1284	1435
UCHL1	1.22604	3.92785	0.789937	4.97236	6.61434e-07	0.000332641	TRUE	UP	ENSG00000154277.13		XIST-225	2.19597	4.43267	0.714845	6.20088	5.6147e-10	1.454e-06	TRUE	UP	ENST00000650627.1			DOWN	36	79	408	929	1290
SLIT2	2.97965	3.86857	0.685919	5.63998	1.70068e-08	1.34403e-05	TRUE	UP	ENSG00000145147.20		IRS4-202	1.86222	4.20377	0.734063	5.72672	1.02393e-08	1.87789e-05	TRUE	UP	ENST00000564206.2				60	144	877	2213	2725
CA2	1.01714	3.70398	0.817412	4.53135	5.86082e-06	0.00223601	TRUE	UP	ENSG00000104267.10		TSIX-201	2.30336	4.17234	0.707935	5.89368	3.77687e-09	7.35971e-06	TRUE	UP	ENST00000604411.1
AMOT	0.92067	3.51002	0.847654	4.14086	3.46008e-05	0.0107679	TRUE	UP	ENSG00000126016.17		ZNF503-201	1.69663	4.01471	0.735339	5.45967	4.77024e-08	7.74289e-05	TRUE	UP	ENST00000372524.5
NEFL	1.11605	3.44966	0.803928	4.291	1.77868e-05	0.00578804	TRUE	UP	ENSG00000277586.4		IRS4-201	1.55974	3.97495	0.744853	5.33655	9.47292e-08	0.000134248	TRUE	UP	ENST00000372129.4
HSPA1A	5.5181	2.91883	0.414649	7.03927	1.93247e-12	5.34521e-09	TRUE	UP	ENSG00000204389.10		XIST-218	1.512	3.8624	0.758517	5.09205	3.54214e-07	0.00048016	TRUE	UP	ENST00000648970.1
HACD3	1.76285	2.78394	0.716992	3.8828	0.00010326	0.0239452	TRUE	UP	ENSG00000074696.13		HSPA1A-202	1.74771	3.75616	0.741545	5.06532	4.07719e-07	0.000508475	TRUE	UP	ENST00000608703.1
PLS3	3.94454	2.16818	0.427803	5.06817	4.01652e-07	0.000222194	TRUE	UP	ENSG00000102024.19		ENST00000701844	1.43923	3.71921	0.766244	4.85382	1.21106e-06	0.00125861	TRUE	UP	ENST00000701844.1
YWHAE	5.58125	1.47881	0.317063	4.66409	3.0999e-06	0.00131913	TRUE	UP	ENSG00000108953.17		CA2-201	0.921212	3.51552	0.849409	4.13878	3.49155e-05	0.0226791	TRUE	UP	ENST00000285379.10
RPL9	4.45905	1.45408	0.3556	4.08908	4.33088e-05	0.0126097	TRUE	UP	ENSG00000163682.17		SLIT2-204	1.92753	3.16325	0.713023	4.43639	9.14789e-06	0.00731316	TRUE	UP	ENST00000504154.6
MT-ND3	3.95225	1.41761	0.382493	3.70622	0.000210374	0.041564	TRUE	UP	ENSG00000198840.2		HSPA1B-201	2.45786	2.84803	0.620063	4.59313	4.3664e-06	0.00378154	TRUE	UP	ENST00000375650.5
HMGN2	4.27895	1.38615	0.36074	3.8425	0.000121786	0.0254234	TRUE	UP	ENSG00000198830.11		HSPA1A-201	4.09974	2.62824	0.460571	5.70649	1.1533e-08	1.99765e-05	TRUE	UP	ENST00000375651.7
H4C3	8.37403	1.19301	0.262152	4.55082	5.34372e-06	0.00211153	TRUE	UP	ENSG00000197061.5		PLS3-202	2.752	1.96028	0.501042	3.9124	9.13846e-05	0.0482913	TRUE	UP	ENST00000355899.8
RPS8	11.2162	1.05202	0.21663	4.85629	1.19605e-06	0.000529326	TRUE	UP	ENSG00000142937.12		VIM-201	3.99559	1.57353	0.402627	3.90815	9.30044e-05	0.0483282	TRUE	UP	ENST00000224237.9
RPL36	9.92656	0.922819	0.226021	4.0829	4.44777e-05	0.012618	TRUE	UP	ENSG00000130255.13		RPS8-202	9.41106	1.14822	0.238398	4.81641	1.46167e-06	0.00138097	TRUE	UP	ENST00000396651.8
RPS15	14.7821	0.794142	0.191915	4.13799	3.50364e-05	0.0107679	TRUE	UP	ENSG00000115268.10		H4C3-201	8.52935	1.04645	0.254706	4.10845	3.98328e-05	0.025345	TRUE	UP	ENST00000377803.4
MT-RNR2	857.529	0.738075	0.112674	6.55052	5.73382e-11	9.06272e-08	TRUE	UP	ENSG00000210082.2		RPS17-209	17.6711	0.705492	0.173368	4.06934	4.71458e-05	0.0272206	TRUE	UP	ENST00000647841.1
MT-RNR1	299.319	0.627255	0.116258	5.39536	6.83858e-08	5.04414e-05	TRUE	UP	ENSG00000211459.2		MT-RNR2-201	902.444	0.637487	0.0977179	6.52375	6.85691e-11	2.37539e-07	TRUE	UP	ENST00000387347.2
ENSG00000280614	244.196	0.375341	0.095357	3.93617	8.27931e-05	0.0213029	TRUE	UP	ENSG00000280614.1		MT-RNR1-201	311.667	0.542211	0.109989	4.92969	8.23595e-07	0.000987617	TRUE	UP	ENST00000389680.2
ENSG00000280800	248.714	0.358172	0.0901605	3.97261	7.10892e-05	0.0187269	TRUE	UP	ENSG00000280800.1		ENST00000445125	813.249	0.397289	0.0830858	4.78167	1.73845e-06	0.00159415	TRUE	UP	ENST00000445125.2
RPS21	11.0452	-0.833855	0.221936	-3.75718	0.000171837	0.0345673	TRUE	DOWN	ENSG00000171858.18		ENST00000631211	224.588	0.358695	0.0828585	4.329	1.49785e-05	0.0113902	TRUE	UP	ENST00000631211.1
PPIA	18.1822	-0.899361	0.179896	-4.99935	5.75246e-07	0.000303073	TRUE	DOWN	ENSG00000196262.15		MT-ND4-201	56.0862	-0.638941	0.106079	-6.02326	1.70936e-09	3.80674e-06	TRUE	DOWN	ENST00000361381.2
ACTB	14.0402	-0.921623	0.235536	-3.91288	9.12026e-05	0.0224411	TRUE	DOWN	ENSG00000075624.17		MT-CO1-201	103.653	-0.641276	0.098752	-6.4938	8.36978e-11	2.60953e-07	TRUE	DOWN	ENST00000361624.2
MT-CO3	34.7655	-0.938684	0.149755	-6.26813	3.65412e-10	4.49213e-07	TRUE	DOWN	ENSG00000198938.2		MT-ND1-201	34.3257	-0.863761	0.128909	-6.70055	2.07642e-11	8.09234e-08	TRUE	DOWN	ENST00000361390.2
RPS20	9.07821	-0.962584	0.247206	-3.89385	9.86675e-05	0.0237317	TRUE	DOWN	ENSG00000008988.11		MT-CO3-201	79.7117	-0.918908	0.104503	-8.79315	1.4543e-18	2.26711e-14	TRUE	DOWN	ENST00000362079.2
RPLP0	11.3881	-1.04543	0.225807	-4.62976	3.66085e-06	0.00150013	TRUE	DOWN	ENSG00000089157.16		RPS21-201	10.9386	-0.924247	0.220183	-4.19763	2.69727e-05	0.0191833	TRUE	DOWN	ENST00000343986.9
RMRP	6.5353	-1.14343	0.294597	-3.88134	0.000103884	0.0239452	TRUE	DOWN	ENSG00000277027.1		PPIA-204	17.0061	-0.977217	0.179224	-5.45249	4.96689e-08	7.74289e-05	TRUE	DOWN	ENST00000468812.6
RPL37	17.2677	-1.18726	0.185423	-6.40298	1.52371e-10	2.10729e-07	TRUE	DOWN	ENSG00000145592.14		NPM1-201	9.58599	-1.17698	0.239132	-4.92186	8.57259e-07	0.000989912	TRUE	DOWN	ENST00000296930.10
LDHA	7.71526	-1.23361	0.279578	-4.41241	1.02226e-05	0.00364849	TRUE	DOWN	ENSG00000134333.15		RMRP-201	6.77026	-1.19584	0.287589	-4.15815	3.20832e-05	0.0212828	TRUE	DOWN	ENST00000363046.1
NPM1	17.9718	-1.26263	0.18411	-6.85803	6.98186e-12	1.28746e-08	TRUE	DOWN	ENSG00000181163.14		RPL37-201	15.5546	-1.33406	0.19493	-6.84379	7.71231e-12	3.43506e-08	TRUE	DOWN	ENST00000274242.10
HSPD1	10.2611	-1.34046	0.274579	-4.88188	1.05078e-06	0.000484411	TRUE	DOWN	ENSG00000144381.18		RPS25-202	5.2043	-1.39471	0.33532	-4.15935	3.1916e-05	0.0212828	TRUE	DOWN	ENST00000527673.2
HSPA8	5.13157	-1.41753	0.345758	-4.09977	4.13569e-05	0.0123668	TRUE	DOWN	ENSG00000109971.14		HSPD1-202	4.80902	-1.43651	0.364168	-3.94463	7.99247e-05	0.0429637	TRUE	DOWN	ENST00000388968.8
ENO1	9.48496	-1.56514	0.259171	-6.03901	1.55062e-09	1.42968e-06	TRUE	DOWN	ENSG00000074800.16		ENO1-201	6.87832	-1.43809	0.293621	-4.89778	9.69243e-07	0.00107704	TRUE	DOWN	ENST00000234590.10
S100A11	3.60111	-1.703	0.435251	-3.91269	9.12736e-05	0.0224411	TRUE	DOWN	ENSG00000163191.6		TMSB10-201	5.6127	-1.48482	0.333685	-4.44976	8.59647e-06	0.00705318	TRUE	DOWN	ENST00000233143.6
TAGLN2	2.80398	-1.84554	0.502535	-3.67245	0.000240233	0.0458266	TRUE	DOWN	ENSG00000158710.15		HSPE1-201	7.30053	-1.9036	0.307587	-6.18879	6.06262e-10	1.454e-06	TRUE	DOWN	ENST00000233893.10
FTL	8.82767	-2.0436	0.296496	-6.89251	5.48164e-12	1.21298e-08	TRUE	DOWN	ENSG00000087086.15		FTL-201	9.02128	-2.05649	0.290781	-7.07229	1.52395e-12	7.91894e-09	TRUE	DOWN	ENST00000331825.11
LGALS1	2.56172	-2.87852	0.654407	-4.39867	1.08914e-05	0.0037657	TRUE	DOWN	ENSG00000100097.12		LGALS1-201	2.40224	-2.78374	0.663303	-4.19679	2.70725e-05	0.0191833	TRUE	DOWN	ENST00000215909.10
GAL	1.31693	-3.02088	0.783187	-3.85716	0.000114711	0.0246953	TRUE	DOWN	ENSG00000069482.7		FTH1-201	11.6423	-2.99896	0.318067	-9.42868	4.15283e-21	1.29477e-16	TRUE	DOWN	ENST00000273550.12
CD24	1.04985	-3.06638	0.809728	-3.78692	0.000152527	0.0312511	TRUE	DOWN	ENSG00000272398.6		FTH1-212	1.27524	-3.03901	0.760937	-3.99378	6.50288e-05	0.0368631	TRUE	DOWN	ENST00000620041.4
OLFM1	1.01998	-3.06722	0.831506	-3.68875	0.000225356	0.0437428	TRUE	DOWN	ENSG00000130558.20		GAL-201	1.35202	-3.07127	0.77612	-3.95721	7.58292e-05	0.0414772	TRUE	DOWN	ENST00000265643.4
NQO1	1.04164	-3.0973	0.803597	-3.85429	0.000116066	0.0246953	TRUE	DOWN	ENSG00000181019.13		SQSTM1-202	1.36319	-3.13922	0.770102	-4.07638	4.57426e-05	0.026976	TRUE	DOWN	ENST00000389805.9
KRT81	1.01705	-3.11333	0.806307	-3.86122	0.000112821	0.0246953	TRUE	DOWN	ENSG00000205426.11		KRT17-201	1.29101	-3.15952	0.774958	-4.07702	4.56167e-05	0.026976	TRUE	DOWN	ENST00000311208.13
ASS1	1.02428	-3.11353	0.806535	-3.86038	0.000113211	0.0246953	TRUE	DOWN	ENSG00000130707.18		KRT81-201	1.07757	-3.22169	0.790444	-4.0758	4.5857e-05	0.026976	TRUE	DOWN	ENST00000327741.9
AKR1C3	1.13981	-3.24427	0.803236	-4.039	5.36793e-05	0.0148477	TRUE	DOWN	ENSG00000196139.14		TM4SF1-201	0.924572	-3.25356	0.817341	-3.98066	6.87246e-05	0.0382624	TRUE	DOWN	ENST00000305366.8
TM4SF1	0.949893	-3.27373	0.818324	-4.00052	6.32028e-05	0.0170555	TRUE	DOWN	ENSG00000169908.12		AKR1C3-201	1.13988	-3.2598	0.796257	-4.0939	4.24179e-05	0.0264501	TRUE	DOWN	ENST00000380554.5
TMSB4X	6.79618	-3.35746	0.451154	-7.44194	9.92164e-14	3.6591e-10	TRUE	DOWN	ENSG00000205542.11		HSPB1-201	1.14209	-3.31676	0.776312	-4.27246	1.93325e-05	0.0143512	TRUE	DOWN	ENST00000248553.7
SLC7A5	1.26479	-3.42258	0.767828	-4.45748	8.29296e-06	0.00305844	TRUE	DOWN	ENSG00000103257.9		TMSB4X-204	6.34636	-3.4019	0.469872	-7.24006	4.48486e-13	2.79658e-09	TRUE	DOWN	ENST00000451311.7
CPS1	3.21626	-3.53835	0.660302	-5.35868	8.38307e-08	5.7969e-05	TRUE	DOWN	ENSG00000021826.18		SLC7A11-201	1.03645	-3.41082	0.817193	-4.17382	2.99532e-05	0.0207529	TRUE	DOWN	ENST00000280612.9
HSPB1	2.30811	-3.6096	0.706755	-5.10729	3.26821e-07	0.000190313	TRUE	DOWN	ENSG00000106211.10		SLC7A5-201	1.04361	-3.47984	0.786679	-4.42346	9.71344e-06	0.00757114	TRUE	DOWN	ENST00000261622.5
CGA	1.53293	-3.65384	0.744303	-4.90907	9.15083e-07	0.000440195	TRUE	DOWN	ENSG00000135346.9		S100A4-204	1.07192	-3.49292	0.780336	-4.47617	7.59938e-06	0.00640361	TRUE	DOWN	ENST00000368716.9
BASP1	2.42303	-3.69079	0.711159	-5.18983	2.10485e-07	0.000129378	TRUE	DOWN	ENSG00000176788.9		CPS1-201	1.69572	-3.50722	0.725124	-4.83672	1.31998e-06	0.00130726	TRUE	DOWN	ENST00000233072.10
IFITM3	1.44053	-3.88516	0.899071	-4.3213	1.55109e-05	0.00520039	TRUE	DOWN	ENSG00000142089.17		BASP1-201	1.68387	-3.52942	0.730205	-4.83347	1.34173e-06	0.00130726	TRUE	DOWN	ENST00000322611.4
CASC19	2.13759	-4.10564	0.71877	-5.71203	1.11639e-08	9.50133e-06	TRUE	DOWN	ENSG00000254166.4		CGA-204	1.48379	-3.62009	0.740111	-4.89128	1.0018e-06	0.00107704	TRUE	DOWN	ENST00000627148.3
S100A4	2.42553	-4.32431	0.702594	-6.15477	7.51863e-10	7.56237e-07	TRUE	DOWN	ENSG00000196154.12		S100A4-201	1.20906	-3.64012	0.775855	-4.69176	2.7087e-06	0.00241291	TRUE	DOWN	ENST00000354332.8
S100A6	5.30269	-5.15484	0.672421	-7.66608	1.77328e-14	1.96195e-10	TRUE	DOWN	ENSG00000197956.10		IFITM3-201	1.44749	-3.9088	0.770117	-5.07559	3.86289e-07	0.000501822	TRUE	DOWN	ENST00000399808.5
											S100A6-205	1.54511	-4.02004	0.743145	-5.40949	6.32043e-08	9.38373e-05	TRUE	DOWN	ENST00000496817.5
											S100A6-201	3.73894	-4.34722	0.684245	-6.3533	2.10746e-10	5.97331e-07	TRUE	DOWN	ENST00000368719.9
2 hour post-sequencing initiation											2 hour post-sequencing initiation
gene name	gene base mean	log 2 fold change	lfcSE	stat	p-value	p-adjusted	significance	significance_reg	gene ID		transcript name	transcript base mean	log 2 fold change	lfcSE	stat	p-value	p-adjusted	significance	significance_reg	gene ID
IRS4	4.96911	5.30173	0.678514	7.81373	5.55183e-15	1.93574e-12	TRUE	UP	ENSG00000133124.12		XIST-204	13.6379	5.68795	0.588524	9.66477	4.25569e-22	1.07669e-18	TRUE	UP	ENST00000429829.6
XIST	8.76322	5.25496	0.624996	8.408	4.17074e-17	2.1813e-14	TRUE	UP	ENSG00000229807.13		NEFL-201	6.79174	5.4438	0.666833	8.16366	3.25021e-16	4.11151e-13	TRUE	UP	ENST00000610854.2
UCHL1	2.68594	4.97407	0.706815	7.03729	1.96013e-12	4.39349e-10	TRUE	UP	ENSG00000154277.13		IRS4-202	4.15189	5.33954	0.68197	7.82958	4.89498e-15	4.76319e-12	TRUE	UP	ENST00000564206.2
SLIT2	4.79125	4.56717	0.661428	6.90501	5.02016e-12	1.05022e-09	TRUE	UP	ENSG00000145147.20		XIST-225	4.17126	5.02409	0.684884	7.33568	2.20602e-13	1.87632e-10	TRUE	UP	ENST00000650627.1
ZNF503	2.40591	4.16331	0.711863	5.84848	4.96088e-09	5.02169e-07	TRUE	UP	ENSG00000165655.17		IRS4-201	3.3207	4.99348	0.693388	7.20156	5.95254e-13	4.70623e-10	TRUE	UP	ENST00000372129.4
CA2	2.14679	4.05876	0.721827	5.6229	1.87782e-08	1.6836e-06	TRUE	UP	ENSG00000104267.10		XIST-223	3.42707	4.70881	0.693944	6.78558	1.15625e-11	7.69819e-09	TRUE	UP	ENST00000650366.1
RADX	1.30122	3.96135	1.14513	3.45929	0.000541599	0.0131747	TRUE	UP	ENSG00000147231.14		UCHL1-201	2.06248	4.61811	0.722585	6.39109	1.64712e-10	8.3344e-08	TRUE	UP	ENST00000284440.9
AMOT	1.58445	3.88454	0.748632	5.18884	2.11603e-07	1.4435e-05	TRUE	UP	ENSG00000126016.17		XIST-218	2.80531	4.42187	0.702365	6.2957	3.06024e-10	1.43378e-07	TRUE	UP	ENST00000648970.1
NEFL	1.78862	3.74656	0.740459	5.05978	4.19742e-07	2.74406e-05	TRUE	UP	ENSG00000277586.4		HSPA1A-202	3.14698	4.31085	0.696015	6.19361	5.88023e-10	2.4795e-07	TRUE	UP	ENST00000608703.1
ZNF703	1.36608	3.6621	0.778276	4.7054	2.53369e-06	0.000137081	TRUE	UP	ENSG00000183779.7		ZNF503-201	3.09344	4.27198	0.689295	6.19761	5.73268e-10	2.4795e-07	TRUE	UP	ENST00000372524.5
CHRM2	0.995021	3.62484	0.830867	4.36272	1.28455e-05	0.000592784	TRUE	UP	ENSG00000181072.12		TSIX-201	4.28187	4.18738	0.6448	6.49408	8.3541e-11	4.59476e-08	TRUE	UP	ENST00000604411.1
ECHDC2	0.870233	3.45695	0.883693	3.91193	9.15618e-05	0.00322833	TRUE	UP	ENSG00000121310.17		SLIT2-204	3.18745	3.95193	0.678556	5.82404	5.74426e-09	2.07614e-06	TRUE	UP	ENST00000504154.6
MARCKSL1	1.69809	3.38955	0.733714	4.61971	3.8428e-06	0.000204385	TRUE	UP	ENSG00000175130.7		CA2-201	1.95476	3.93777	0.723136	5.44541	5.16865e-08	1.36216e-05	TRUE	UP	ENST00000285379.10
ANKRD36B	0.874866	3.35272	0.890102	3.76667	0.000165442	0.00524401	TRUE	UP	ENSG00000196912.13		XIST-219	1.47432	3.76016	0.762561	4.93097	8.18239e-07	0.000172512	TRUE	UP	ENST00000648991.1
ARID1B	0.849836	3.33183	0.866957	3.84313	0.000121477	0.00414341	TRUE	UP	ENSG00000049618.25		ZNF703-201	1.42624	3.73697	0.762158	4.90314	9.43152e-07	0.000195588	TRUE	UP	ENST00000331569.6
KCNQ1OT1	0.817101	3.29764	0.879966	3.74746	0.000178633	0.00554999	TRUE	UP	ENSG00000269821.1		AMOT-203	1.04309	3.68365	0.798219	4.61484	3.93401e-06	0.000654806	TRUE	UP	ENST00000371959.9
AFDN	0.824453	3.26727	0.890798	3.6678	0.000244646	0.00710833	TRUE	UP	ENSG00000130396.22		XIST-221	1.32131	3.6292	0.899492	4.03472	5.46668e-05	0.00705648	TRUE	UP	ENST00000649757.1
HSPA1A	11.1048	3.24898	0.326094	9.96333	2.20554e-23	2.307e-20	TRUE	UP	ENSG00000204389.10		ENST00000701844	2.30441	3.52025	0.696601	5.05347	4.33846e-07	9.46232e-05	TRUE	UP	ENST00000701844.1
MAFB	0.796653	3.23931	0.898495	3.60526	0.000311841	0.00836373	TRUE	UP	ENSG00000204103.4		MARCKSL1-201	1.69744	3.40972	0.729854	4.67179	2.98589e-06	0.000517418	TRUE	UP	ENST00000329421.8
HOXA5	0.771105	3.21356	0.909146	3.5347	0.000408236	0.0104411	TRUE	UP	ENSG00000106004.5		HOXA5-201	0.813345	3.31623	0.879948	3.76867	0.000164122	0.0182117	TRUE	UP	ENST00000222726.4
FHL1	1.88433	3.18409	0.722083	4.40958	1.03571e-05	0.000492434	TRUE	UP	ENSG00000022267.19		EIF4A2-201	1.31173	3.30751	0.766777	4.31352	1.60673e-05	0.0023912	TRUE	UP	ENST00000323963.10
BEX4	0.770052	3.17	0.893258	3.54881	0.000386978	0.0102045	TRUE	UP	ENSG00000102409.10		XIST-222	0.797359	3.29939	0.886751	3.72076	0.000198625	0.0209383	TRUE	UP	ENST00000650186.1
LINC00342	1.02245	3.16914	0.826061	3.83645	0.000124826	0.00421186	TRUE	UP	ENSG00000232931.6		AP1S2-201	1.02125	3.27549	0.810878	4.03943	5.35803e-05	0.00698753	TRUE	UP	ENST00000329235.6
OCIAD2	0.974157	3.15614	0.835994	3.77531	0.000159808	0.00511712	TRUE	UP	ENSG00000145247.12		MAFB-201	0.802329	3.26082	0.880654	3.70273	0.000213294	0.0215154	TRUE	UP	ENST00000373313.3
MAGED1	0.753159	3.15293	0.927555	3.39919	0.000675861	0.0150938	TRUE	UP	ENSG00000179222.18		TUBA1A-202	1.26981	3.21697	0.779129	4.12893	3.64455e-05	0.00495738	TRUE	UP	ENST00000301071.12
PSPC1	0.704035	3.08398	0.943455	3.26882	0.00107997	0.0209194	TRUE	UP	ENSG00000121390.19		BEX4-202	0.77087	3.18719	0.878748	3.62697	0.000286767	0.0274818	TRUE	UP	ENST00000372695.6
HSPA1B	1.12535	2.97165	0.814753	3.6473	0.000265007	0.00729468	TRUE	UP	ENSG00000204388.7		HSPA1B-201	4.93665	3.10435	0.466349	6.6567	2.80038e-11	1.77124e-08	TRUE	UP	ENST00000375650.5
USP9X	1.30088	2.89409	0.78631	3.68059	0.000232694	0.00682424	TRUE	UP	ENSG00000124486.15		HSPA1A-201	8.6785	3.07962	0.376211	8.18587	2.70341e-16	3.79979e-13	TRUE	UP	ENST00000375651.7
NUCB2	0.785048	2.87432	0.904842	3.17659	0.00149015	0.026759	TRUE	UP	ENSG00000070081.18		LINC00342-209	1.4147	3.0479	0.762675	3.99633	6.43334e-05	0.0079786	TRUE	UP	ENST00000661329.1
SMARCA2	0.829477	2.86195	0.898602	3.18489	0.00144809	0.0265736	TRUE	UP	ENSG00000080503.25		ARIH1-201	0.97623	2.83013	0.818889	3.45606	0.000548135	0.0481522	TRUE	UP	ENST00000379887.9
LRCH3	0.80901	2.85756	0.888483	3.21623	0.00129888	0.0244065	TRUE	UP	ENSG00000186001.14		SOX4-201	1.77701	2.47137	0.676623	3.6525	0.000259696	0.0254663	TRUE	UP	ENST00000244745.4
USP11	0.777614	2.83089	0.93574	3.0253	0.00248387	0.038396	TRUE	UP	ENSG00000102226.10		MRPL18-201	1.89429	2.3871	0.644897	3.70153	0.000214304	0.0215154	TRUE	UP	ENST00000367034.5
JUN	0.806458	2.82594	0.901508	3.13468	0.00172042	0.0298163	TRUE	UP	ENSG00000177606.8		DYNLT1-203	2.7014	2.15859	0.527289	4.09376	4.24441e-05	0.00565383	TRUE	UP	ENST00000367089.8
FANCA	0.764561	2.80131	0.959295	2.92018	0.00349829	0.0496725	TRUE	UP	ENSG00000187741.16		HACD3-201	2.51902	1.97907	0.518389	3.81773	0.000134683	0.015349	TRUE	UP	ENST00000261875.10
PPP1R7	0.730355	2.79264	0.927924	3.00956	0.00261628	0.0402445	TRUE	UP	ENSG00000115685.15		PLS3-202	4.80889	1.89621	0.369344	5.134	2.83651e-07	6.40747e-05	TRUE	UP	ENST00000355899.8
PIK3C2A	0.737479	2.77247	0.943378	2.93888	0.00329405	0.0478553	TRUE	UP	ENSG00000011405.14		GLO1-201	2.99207	1.81825	0.454778	3.99811	6.38501e-05	0.0079786	TRUE	UP	ENST00000373365.5
TM2D3	0.941641	2.76187	0.836853	3.30031	0.000965797	0.0195527	TRUE	UP	ENSG00000184277.13		LAPTM4A-201	2.60264	1.81249	0.490565	3.6947	0.000220148	0.0219281	TRUE	UP	ENST00000175091.5
TNRC6B	0.913778	2.73755	0.869163	3.14964	0.00163471	0.0286576	TRUE	UP	ENSG00000100354.21		RBBP4-202	2.71712	1.73839	0.478687	3.63158	0.000281687	0.0272011	TRUE	UP	ENST00000373493.10
HDAC1	1.91902	2.66803	0.67795	3.93544	8.30459e-05	0.00299538	TRUE	UP	ENSG00000116478.12		NEAT1-202	5.28857	1.68237	0.353987	4.75263	2.00788e-06	0.000352774	TRUE	UP	ENST00000501122.2
TSPAN3	1.6494	2.64896	0.716638	3.69637	0.000218702	0.00653605	TRUE	UP	ENSG00000140391.15		KCNQ1OT1-201	4.48479	1.60317	0.37116	4.31934	1.565e-05	0.00238521	TRUE	UP	ENST00000597346.1
SOX4	1.64409	2.61216	0.71547	3.65097	0.000261248	0.00725485	TRUE	UP	ENSG00000124766.7		HMGN2-201	7.377	1.45379	0.282188	5.15186	2.57917e-07	5.9321e-05	TRUE	UP	ENST00000361427.6
PHACTR4	0.869822	2.60154	0.888128	2.92924	0.0033979	0.0486878	TRUE	UP	ENSG00000204138.13		VIM-201	7.32436	1.42143	0.283274	5.01786	5.22504e-07	0.000112028	TRUE	UP	ENST00000224237.9
BRCA1	1.04812	2.59692	0.815969	3.18262	0.00145948	0.026627	TRUE	UP	ENSG00000012048.24		MIR663AHG-223	4.18092	1.41721	0.367875	3.85243	0.000116949	0.0135726	TRUE	UP	ENST00000601079.6
RPA2	0.905677	2.55731	0.87242	2.93128	0.00337569	0.0486878	TRUE	UP	ENSG00000117748.10		RN7SL1-201	12.2428	1.40016	0.351258	3.98613	6.71588e-05	0.00824815	TRUE	UP	ENST00000618786.1
ID2	0.996781	2.54827	0.816394	3.12138	0.00180008	0.0306992	TRUE	UP	ENSG00000115738.10		YWHAE-201	9.54001	1.34907	0.245569	5.49366	3.93691e-08	1.08265e-05	TRUE	UP	ENST00000264335.13
MYH10	1.0356	2.54723	0.836272	3.04593	0.00231962	0.0365778	TRUE	UP	ENSG00000133026.14		MT-ND3-201	7.84179	1.248	0.27594	4.52274	6.10456e-06	0.000990034	TRUE	UP	ENST00000361227.2
MPC1	1.17494	2.49733	0.787087	3.17288	0.00150935	0.026759	TRUE	UP	ENSG00000060762.19		RPL36-201	12.063	1.19291	0.211651	5.6362	1.7384e-08	5.3636e-06	TRUE	UP	ENST00000347512.8
GTF2H5	1.02334	2.4806	0.816124	3.03949	0.00236978	0.0371819	TRUE	UP	ENSG00000272047.4		RPL9-201	6.08459	1.17754	0.314141	3.74845	0.000177931	0.0189537	TRUE	UP	ENST00000295955.14
CEP78	1.0028	2.47436	0.828205	2.98762	0.00281158	0.042417	TRUE	UP	ENSG00000148019.14		SUMO2-202	10.7891	1.10109	0.225809	4.87622	1.08136e-06	0.000217131	TRUE	UP	ENST00000420826.7
GNL3	1.23101	2.47273	0.778283	3.17716	0.00148723	0.026759	TRUE	UP	ENSG00000163938.17		LINC00273-201	7.10065	1.09999	0.282301	3.89653	9.75797e-05	0.0114295	TRUE	UP	ENST00000539813.1
BSDC1	1.79884	2.45541	0.694789	3.53404	0.00040926	0.0104411	TRUE	UP	ENSG00000160058.19		H2AC12-201	6.32647	1.07795	0.293935	3.66732	0.000245103	0.0242231	TRUE	UP	ENST00000377459.3
MTR	1.4263	2.41792	0.732538	3.30074	0.000964295	0.0195527	TRUE	UP	ENSG00000116984.15		RPS8-202	16.9185	1.03333	0.179327	5.76227	8.29885e-09	2.91612e-06	TRUE	UP	ENST00000396651.8
IGF2BP1	1.18229	2.40044	0.775998	3.09336	0.00197906	0.0325242	TRUE	UP	ENSG00000159217.10		H4C3-201	16.5316	0.942965	0.22517	4.18779	2.8169e-05	0.0039158	TRUE	UP	ENST00000377803.4
CDK16	1.39671	2.3469	0.730147	3.21428	0.00130773	0.0244265	TRUE	UP	ENSG00000102225.17		NUCKS1-201	7.56248	0.923833	0.265381	3.48115	0.000499264	0.0444767	TRUE	UP	ENST00000367142.5
DYNLT1	2.74792	2.34566	0.548306	4.27802	1.88566e-05	0.000821834	TRUE	UP	ENSG00000146425.11		HELLPAR-201	8.29528	0.906569	0.25232	3.59294	0.000326972	0.0310992	TRUE	UP	ENST00000626826.1
PPP4C	1.13323	2.33354	0.791246	2.9492	0.00318596	0.0467175	TRUE	UP	ENSG00000149923.14		RPS17-209	32.4002	0.875278	0.132802	6.59084	4.37352e-11	2.51477e-08	TRUE	UP	ENST00000647841.1
MFSD14B	1.35061	2.3011	0.743141	3.09646	0.00195848	0.0325242	TRUE	UP	ENSG00000148110.17		XACT-203	10.5713	0.854497	0.226135	3.77871	0.000157641	0.0176474	TRUE	UP	ENST00000674361.1
UBXN4	1.486	2.27356	0.716117	3.17485	0.00149916	0.026759	TRUE	UP	ENSG00000144224.17		RPS15-209	17.2077	0.828598	0.177479	4.66871	3.03102e-06	0.000518141	TRUE	UP	ENST00000592588.7
PUM1	1.47867	2.17496	0.724195	3.00328	0.00267084	0.0408834	TRUE	UP	ENSG00000134644.16		MT-RNR2-201	1829.38	0.689792	0.0991082	6.95999	3.40296e-12	2.39153e-09	TRUE	UP	ENST00000387347.2
MRPL39	1.82789	2.1314	0.648342	3.28747	0.00101093	0.020027	TRUE	UP	ENSG00000154719.14		MT-ND6-201	16.8255	0.668082	0.17763	3.76108	0.000169182	0.0184668	TRUE	UP	ENST00000361681.2
PSMD6	1.79947	2.119	0.626762	3.38087	0.000722558	0.0156371	TRUE	UP	ENSG00000163636.11		MT-RNR1-201	630.143	0.577339	0.119133	4.84618	1.25861e-06	0.000242381	TRUE	UP	ENST00000389680.2
SFT2D1	1.99952	2.11059	0.594105	3.55255	0.000381515	0.0101457	TRUE	UP	ENSG00000198818.10		ENST00000445125	1609.78	0.411603	0.0850001	4.84239	1.28287e-06	0.000242381	TRUE	UP	ENST00000445125.2
CTPS1	1.58348	2.10984	0.66471	3.17408	0.00150313	0.026759	TRUE	UP	ENSG00000171793.17		ENST00000631211	452.135	0.362277	0.0819721	4.41951	9.89245e-06	0.00156424	TRUE	UP	ENST00000631211.1
CDKN2C	1.47214	2.10496	0.707858	2.9737	0.00294229	0.0437578	TRUE	UP	ENSG00000123080.12		ENST00000627981	450.653	0.358895	0.0843923	4.2527	2.11209e-05	0.00300201	TRUE	UP	ENST00000627981.1
SAP18	1.51963	2.08045	0.687423	3.02645	0.00247445	0.038396	TRUE	UP	ENSG00000150459.13		ENST00000625598	457.154	0.347802	0.0881279	3.94656	7.92818e-05	0.00946146	TRUE	UP	ENST00000625598.1
ZNF638	2.01488	2.06724	0.60185	3.43481	0.000592976	0.0137834	TRUE	UP	ENSG00000075292.19		MT-CO1-201	204.983	-0.531531	0.090615	-5.86582	4.46921e-09	1.76673e-06	TRUE	DOWN	ENST00000361624.2
HACD3	3.11939	2.06283	0.474767	4.34493	1.39322e-05	0.000624562	TRUE	UP	ENSG00000074696.13		RPS27A-201	17.0669	-0.65388	0.173865	-3.76085	0.00016934	0.0184668	TRUE	DOWN	ENST00000272317.11
MRPL18	2.78869	2.04998	0.515798	3.97438	7.05632e-05	0.00260503	TRUE	UP	ENSG00000112110.10		RPL7-201	21.6848	-0.660558	0.158661	-4.16333	3.13636e-05	0.0043125	TRUE	DOWN	ENST00000352983.7
GLO1	3.33086	2.01653	0.449477	4.48639	7.24396e-06	0.000360818	TRUE	UP	ENSG00000124767.7		PPIA-204	33.1222	-0.722429	0.130071	-5.55413	2.78997e-08	7.84292e-06	TRUE	DOWN	ENST00000468812.6
TMEM50A	1.77496	1.9586	0.645254	3.03539	0.00240223	0.0375034	TRUE	UP	ENSG00000183726.11		MT-ND4-201	108.316	-0.726244	0.0881249	-8.24108	1.7067e-16	2.69872e-13	TRUE	DOWN	ENST00000361381.2
BRD2	2.18927	1.95517	0.576001	3.39439	0.000687829	0.0150938	TRUE	UP	ENSG00000204256.14		GAPDH-201	18.9319	-0.728272	0.167882	-4.33801	1.43781e-05	0.00224547	TRUE	DOWN	ENST00000229239.10
PLS3	7.25357	1.92636	0.307038	6.27402	3.51838e-10	4.6222e-08	TRUE	UP	ENSG00000102024.19		RPS21-201	21.0919	-0.730061	0.159143	-4.58746	4.48676e-06	0.000737111	TRUE	DOWN	ENST00000343986.9
MARCKS	2.73337	1.83971	0.590429	3.1159	0.00183386	0.030939	TRUE	UP	ENSG00000277443.3		RPS27A-203	10.3333	-0.808134	0.226186	-3.57288	0.000353083	0.0330852	TRUE	DOWN	ENST00000404735.1
SF3B5	2.25968	1.82303	0.552022	3.30247	0.000958387	0.0195527	TRUE	UP	ENSG00000169976.7		MT-CO3-201	155.622	-0.870505	0.0829324	-10.4966	8.95774e-26	5.66577e-22	TRUE	DOWN	ENST00000362079.2
LAPTM4A	2.58912	1.80557	0.497841	3.62681	0.000286949	0.00776246	TRUE	UP	ENSG00000068697.7		MT-ND1-201	64.3212	-0.952498	0.104188	-9.14207	6.12707e-20	1.29179e-16	TRUE	DOWN	ENST00000361390.2
HDAC2	1.89843	1.7971	0.580877	3.09377	0.00197632	0.0325242	TRUE	UP	ENSG00000196591.12		HSP90AB1-203	8.55611	-1.10284	0.294254	-3.74793	0.000178299	0.0189537	TRUE	DOWN	ENST00000371646.10
HPRT1	1.83312	1.74696	0.596251	2.92992	0.00339055	0.0486878	TRUE	UP	ENSG00000165704.15		ACTB-217	12.124	-1.10918	0.315409	-3.51665	0.00043703	0.0392088	TRUE	DOWN	ENST00000646664.1
BEX3	5.44505	1.48999	0.342495	4.3504	1.35891e-05	0.00061801	TRUE	UP	ENSG00000166681.14		ENO1-201	13.8294	-1.12415	0.202345	-5.55558	2.76684e-08	7.84292e-06	TRUE	DOWN	ENST00000234590.10
SON	2.61794	1.47556	0.492154	2.99818	0.00271599	0.0413727	TRUE	UP	ENSG00000159140.23		COX8A-201	7.20327	-1.13467	0.286112	-3.96583	7.31424e-05	0.00881192	TRUE	DOWN	ENST00000314133.4
SRSF11	3.43755	1.43971	0.423485	3.39968	0.00067464	0.0150938	TRUE	UP	ENSG00000116754.14		RPL37-201	26.9661	-1.18515	0.147928	-8.01162	1.13208e-15	1.3019e-12	TRUE	DOWN	ENST00000274242.10
ILF3	3.26861	1.43863	0.423554	3.39657	0.000682364	0.0150938	TRUE	UP	ENSG00000129351.18		RMRP-201	12.8648	-1.23663	0.239568	-5.16191	2.44446e-07	5.72636e-05	TRUE	DOWN	ENST00000363046.1
MT-ND3	6.45801	1.38247	0.310836	4.44758	8.68429e-06	0.000425802	TRUE	UP	ENSG00000198840.2		ATP5F1E-201	10.1437	-1.28213	0.241556	-5.30779	1.10963e-07	2.69938e-05	TRUE	DOWN	ENST00000243997.8
HMGB2	3.87906	1.36686	0.386555	3.53602	0.00040621	0.0104411	TRUE	UP	ENSG00000164104.12		LDHA-205	7.94664	-1.32505	0.275461	-4.81031	1.50698e-06	0.00027628	TRUE	DOWN	ENST00000422447.8
RN7SL1	11.3938	1.35086	0.366418	3.68665	0.000227224	0.00672667	TRUE	UP	ENSG00000276168.1		GSTP1-202	3.87111	-1.38178	0.391128	-3.53281	0.000411163	0.0374188	TRUE	DOWN	ENST00000398606.10
NASP	2.94874	1.34891	0.453317	2.97565	0.00292372	0.0436887	TRUE	UP	ENSG00000132780.17		NPM1-201	19.4025	-1.41138	0.179452	-7.86493	3.69306e-15	3.8931e-12	TRUE	DOWN	ENST00000296930.10
YWHAE	11.2809	1.34354	0.227075	5.91673	3.28404e-09	3.43511e-07	TRUE	UP	ENSG00000108953.17		NPM1-204	5.33662	-1.46543	0.423686	-3.45877	0.000542648	0.0480035	TRUE	DOWN	ENST00000517671.5
ILF2	3.37236	1.323	0.41121	3.21734	0.00129384	0.0244065	TRUE	UP	ENSG00000143621.17		TUBA1C-201	6.57272	-1.46575	0.306723	-4.77875	1.76385e-06	0.000318753	TRUE	DOWN	ENST00000301072.11
PSMB1	3.32083	1.32285	0.427408	3.09506	0.00196773	0.0325242	TRUE	UP	ENSG00000008018.9		HSPD1-202	9.3935	-1.46674	0.258925	-5.66475	1.47239e-08	4.90151e-06	TRUE	DOWN	ENST00000388968.8
HMGN2	8.76313	1.31972	0.257947	5.11625	3.11667e-07	2.08087e-05	TRUE	UP	ENSG00000198830.11		DSTN-201	3.83561	-1.64573	0.419209	-3.9258	8.64428e-05	0.0102196	TRUE	DOWN	ENST00000246069.12
RPL9	8.59036	1.30451	0.261516	4.98827	6.09238e-07	3.67652e-05	TRUE	UP	ENSG00000163682.17		TKT-207	2.83833	-1.68967	0.47231	-3.57745	0.000346958	0.0327539	TRUE	DOWN	ENST00000462138.6
SOD1	3.97463	1.2914	0.384399	3.35952	0.000780791	0.0166675	TRUE	UP	ENSG00000142168.15		TMSB10-201	10.3066	-1.71394	0.287341	-5.96483	2.44889e-09	9.99306e-07	TRUE	DOWN	ENST00000233143.6
NEAT1	4.65419	1.25435	0.358573	3.49818	0.000468441	0.0115745	TRUE	UP	ENSG00000245532.11		TRMT112-206	2.96875	-1.74393	0.46953	-3.71421	0.000203836	0.0213102	TRUE	DOWN	ENST00000544844.6
RBMX	3.51123	1.22802	0.40198	3.05493	0.0022511	0.0358577	TRUE	UP	ENSG00000147274.14		EIF4B-201	5.30118	-1.74998	0.361397	-4.84225	1.28376e-06	0.000242381	TRUE	DOWN	ENST00000262056.14
DDX3X	4.47536	1.175	0.358369	3.27874	0.00104271	0.0203231	TRUE	UP	ENSG00000215301.11		S100A11-201	5.3919	-1.95025	0.36775	-5.30319	1.13795e-07	2.71605e-05	TRUE	DOWN	ENST00000271638.3
RPL36	16.9225	1.13167	0.180396	6.27328	3.53515e-10	4.6222e-08	TRUE	UP	ENSG00000130255.13		SLC38A1-201	2.27838	-1.9695	0.558566	-3.52599	0.000421896	0.0381214	TRUE	DOWN	ENST00000398637.10
H2AC12	6.30983	1.09984	0.296469	3.70979	0.000207429	0.00631954	TRUE	UP	ENSG00000274997.2		PKM-202	3.1878	-2.01881	0.475339	-4.2471	2.16552e-05	0.00304375	TRUE	DOWN	ENST00000335181.10
MT-ND6	5.22316	1.03934	0.33617	3.09172	0.00199001	0.0325242	TRUE	UP	ENSG00000198695.2		FTL-201	16.4814	-2.07587	0.214684	-9.66943	4.06652e-22	1.07669e-18	TRUE	DOWN	ENST00000331825.11
RPS8	19.5313	1.00538	0.172421	5.83097	5.51067e-09	5.20208e-07	TRUE	UP	ENSG00000142937.12		TMEM14C-201	3.32542	-2.12189	0.489973	-4.33063	1.48681e-05	0.00229368	TRUE	DOWN	ENST00000229563.6
ARF1	5.04109	0.982934	0.328795	2.9895	0.00279432	0.0423603	TRUE	UP	ENSG00000143761.17		GAL-201	2.53545	-2.1411	0.57111	-3.74901	0.000177534	0.0189537	TRUE	DOWN	ENST00000265643.4
H4C3	16.148	0.98236	0.233288	4.21094	2.5431e-05	0.00105003	TRUE	UP	ENSG00000197061.5		HSPE1-201	13.2732	-2.15549	0.242821	-8.87689	6.8753e-19	1.24246e-15	TRUE	DOWN	ENST00000233893.10
NUCKS1	7.49314	0.88768	0.265923	3.3381	0.00084352	0.0178849	TRUE	UP	ENSG00000069275.13		BZW1-203	4.00126	-2.22101	0.454627	-4.88535	1.03244e-06	0.00021065	TRUE	DOWN	ENST00000409600.6
RPL36AP37	17.4764	0.774293	0.182043	4.25336	2.10586e-05	0.000892728	TRUE	UP	ENSG00000244398.1		HSPA8-224	4.80917	-2.3432	0.418489	-5.59919	2.1536e-08	6.48643e-06	TRUE	DOWN	ENST00000534624.6
EEF2	8.87013	0.728543	0.247711	2.94111	0.00327042	0.0477329	TRUE	UP	ENSG00000167658.16		PRELID3B-201	1.44713	-2.61395	0.735177	-3.55554	0.000377203	0.0345769	TRUE	DOWN	ENST00000355937.9
MT-RNR2	1743.77	0.718733	0.109427	6.56815	5.09427e-11	8.88102e-09	TRUE	UP	ENSG00000210082.2		NPM1-220	1.49021	-2.63287	0.738893	-3.56326	0.000366283	0.034025	TRUE	DOWN	ENST00000677467.1
RPS15	25.922	0.70045	0.146259	4.78912	1.67513e-06	9.38669e-05	TRUE	UP	ENSG00000115268.10		CD55-204	1.47347	-2.68388	0.736532	-3.64394	0.000268498	0.0261269	TRUE	DOWN	ENST00000367064.9
RPL13	12.9633	0.638493	0.204777	3.11799	0.0018209	0.0308864	TRUE	UP	ENSG00000167526.14		NPM1-229	1.38672	-2.79609	0.755281	-3.70206	0.000213857	0.0215154	TRUE	DOWN	ENST00000678280.1
RPS19	22.4239	0.621155	0.155049	4.00619	6.17066e-05	0.0023614	TRUE	UP	ENSG00000105372.8		FTH1-201	20.3928	-2.83663	0.228623	-12.4074	2.38166e-35	3.01281e-31	TRUE	DOWN	ENST00000273550.12
RPL18	14.2851	0.600412	0.194788	3.0824	0.00205341	0.0332144	TRUE	UP	ENSG00000063177.13		GALNT2-201	1.37439	-2.85277	0.770495	-3.70252	0.000213469	0.0215154	TRUE	DOWN	ENST00000366672.5
MT-RNR1	609.352	0.595206	0.112256	5.30222	1.14403e-07	8.3602e-06	TRUE	UP	ENSG00000211459.2		PTP4A1-203	1.4742	-2.85999	0.753068	-3.79779	0.000145995	0.0164896	TRUE	DOWN	ENST00000626021.3
RPS4X	17.7209	0.583127	0.170383	3.42244	0.000620609	0.0143074	TRUE	UP	ENSG00000198034.11		FTH1-212	2.26345	-2.91007	0.682704	-4.26256	2.02095e-05	0.00290511	TRUE	DOWN	ENST00000620041.4
RPL31	23.1448	0.527432	0.152591	3.4565	0.000547236	0.0132094	TRUE	UP	ENSG00000071082.11		SLPI-201	0.95908	-2.93096	0.822915	-3.56168	0.000368493	0.034025	TRUE	DOWN	ENST00000338380.2
5_8S_rRNA	34.2345	0.421624	0.136761	3.08292	0.00204983	0.0332144	TRUE	UP	ENSG00000275757.1		COL3A1-201	0.941038	-3.01073	0.812299	-3.70642	0.000210206	0.0215154	TRUE	DOWN	ENST00000304636.9
MT-CYB	43.5983	0.38903	0.118439	3.28464	0.00102113	0.020027	TRUE	UP	ENSG00000198727.2		PDE3A-201	0.974887	-3.08855	0.80436	-3.83975	0.000123158	0.0141631	TRUE	DOWN	ENST00000359062.4
ENSG00000281181	153.209	0.350737	0.104356	3.36095	0.000776741	0.0166675	TRUE	UP	ENSG00000281181.1		BST2-201	1.29936	-3.08934	0.767221	-4.02666	5.65754e-05	0.00722908	TRUE	DOWN	ENST00000252593.7
ENSG00000280800	506.289	0.337009	0.0847834	3.97494	7.0396e-05	0.00260503	TRUE	UP	ENSG00000280800.1		PRSS23-201	2.37716	-3.13057	0.676714	-4.62613	3.72564e-06	0.000628391	TRUE	DOWN	ENST00000280258.6
ENSG00000280614	501.681	0.302228	0.0875422	3.45237	0.000555678	0.01321	TRUE	UP	ENSG00000280614.1		LGALS1-201	4.95288	-3.1808	0.500785	-6.35163	2.13046e-10	1.03655e-07	TRUE	DOWN	ENST00000215909.10
MT-CO2	89.8349	-0.282085	0.0900319	-3.13317	0.0017293	0.0298163	TRUE	DOWN	ENSG00000198712.1		EFEMP1-202	1.05255	-3.18966	0.795822	-4.008	6.12339e-05	0.00774609	TRUE	DOWN	ENST00000394555.6
RPL7	16.6345	-0.568232	0.183715	-3.09301	0.00198136	0.0325242	TRUE	DOWN	ENSG00000147604.14		MGST1-205	1.09711	-3.20267	0.783524	-4.08752	4.36011e-05	0.00574536	TRUE	DOWN	ENST00000396210.8
RPLP0	22.7649	-0.603774	0.159168	-3.79331	0.000148653	0.00485911	TRUE	DOWN	ENSG00000089157.16		SQSTM1-202	2.60818	-3.23472	0.670438	-4.82478	1.40157e-06	0.000260733	TRUE	DOWN	ENST00000389805.9
RPL27A	21.0249	-0.68693	0.165675	-4.14625	3.37961e-05	0.00135964	TRUE	DOWN	ENSG00000166441.13		CD24-201	0.955996	-3.28659	0.826695	-3.97558	7.02077e-05	0.00853969	TRUE	DOWN	ENST00000606017.2
PPIA	35.093	-0.721472	0.129978	-5.55074	2.84468e-08	2.28887e-06	TRUE	DOWN	ENSG00000196262.15		BASP1-203	1.25129	-3.32049	0.772132	-4.30041	1.7048e-05	0.00250764	TRUE	DOWN	ENST00000616743.1
RPS21	21.8852	-0.724334	0.158528	-4.56912	4.89773e-06	0.000256151	TRUE	DOWN	ENSG00000171858.18		EFEMP1-201	0.952977	-3.33287	0.814152	-4.09367	4.24596e-05	0.00565383	TRUE	DOWN	ENST00000355426.8
RPS7	15.5287	-0.725768	0.186707	-3.88721	0.000101405	0.00353564	TRUE	DOWN	ENSG00000171863.15		ASS1-201	1.19593	-3.38251	0.78408	-4.31399	1.60337e-05	0.0023912	TRUE	DOWN	ENST00000352480.10
ENSG00000196656	14.9309	-0.759109	0.197384	-3.84585	0.000120136	0.0041427	TRUE	DOWN	ENSG00000196656.7		TMSB4X-204	11.3896	-3.41559	0.349305	-9.77825	1.39603e-22	5.88658e-19	TRUE	DOWN	ENST00000451311.7
RPS20	17.7068	-0.804142	0.182266	-4.41191	1.02464e-05	0.000492434	TRUE	DOWN	ENSG00000008988.11		S100A6-202	1.02861	-3.41899	0.802067	-4.26273	2.01946e-05	0.00290511	TRUE	DOWN	ENST00000368720.6
MT-ND1	36.1639	-0.836047	0.130809	-6.39138	1.64395e-10	2.57936e-08	TRUE	DOWN	ENSG00000198888.2		LY6K-201	1.1072	-3.51653	0.79499	-4.42336	9.71764e-06	0.00155605	TRUE	DOWN	ENST00000292430.10
B2M	8.10913	-0.863938	0.263012	-3.28478	0.00102061	0.020027	TRUE	DOWN	ENSG00000166710.23		SRGN-201	1.40243	-3.60699	0.758515	-4.75533	1.98122e-06	0.000352774	TRUE	DOWN	ENST00000242465.4
RPS27A	17.4342	-0.871386	0.178691	-4.87649	1.07991e-06	6.39386e-05	TRUE	DOWN	ENSG00000143947.15		S100A2-202	1.21493	-3.71392	0.764515	-4.85787	1.18656e-06	0.000234531	TRUE	DOWN	ENST00000368708.9
MT-CO3	67.9441	-0.90131	0.118479	-7.60731	2.79854e-14	7.98347e-12	TRUE	DOWN	ENSG00000198938.2		CPS1-201	3.16182	-3.81537	0.676436	-5.6404	1.69654e-08	5.3636e-06	TRUE	DOWN	ENST00000233072.10
ANXA2	7.19525	-0.939091	0.274692	-3.41871	0.000629195	0.0143074	TRUE	DOWN	ENSG00000182718.18		AKR1C3-201	2.00489	-3.82139	0.718184	-5.32091	1.0325e-07	2.61223e-05	TRUE	DOWN	ENST00000380554.5
HSP90AB1	12.8365	-0.939147	0.269458	-3.48532	0.000491553	0.0120507	TRUE	DOWN	ENSG00000096384.20		KRT17-201	1.98957	-3.8418	0.722868	-5.31466	1.06856e-07	2.65046e-05	TRUE	DOWN	ENST00000311208.13
EIF2S3	6.67384	-0.955362	0.294384	-3.24529	0.00117329	0.0224499	TRUE	DOWN	ENSG00000130741.11		KRT81-201	2.10032	-3.89194	0.710342	-5.47896	4.27822e-08	1.15148e-05	TRUE	DOWN	ENST00000327741.9
YWHAZ	6.70151	-0.980076	0.288944	-3.39192	0.000694036	0.0151242	TRUE	DOWN	ENSG00000164924.18		BASP1-201	2.61116	-3.90513	0.698477	-5.59092	2.25875e-08	6.64493e-06	TRUE	DOWN	ENST00000322611.4
TAGLN2	5.63268	-1.01042	0.312421	-3.23418	0.00121994	0.0232011	TRUE	DOWN	ENSG00000158710.15		SLC7A11-201	1.3903	-3.9071	0.764568	-5.11021	3.21803e-07	7.14177e-05	TRUE	DOWN	ENST00000280612.9
ATP5F1B	4.96327	-1.04218	0.351279	-2.96681	0.00300906	0.0443307	TRUE	DOWN	ENSG00000110955.9		NQO1-201	1.7708	-3.9075	0.726556	-5.37812	7.52697e-08	1.94319e-05	TRUE	DOWN	ENST00000320623.10
CCT6A	5.9222	-1.11189	0.31376	-3.54374	0.000394488	0.0103159	TRUE	DOWN	ENSG00000146731.11		HSPB1-201	2.91296	-4.04111	0.69277	-5.83326	5.43537e-09	2.02228e-06	TRUE	DOWN	ENST00000248553.7
ENO1	19.0568	-1.14244	0.17902	-6.38166	1.75183e-10	2.61773e-08	TRUE	DOWN	ENSG00000074800.16		TM4SF1-201	1.61996	-4.11332	0.727449	-5.65445	1.56348e-08	5.07129e-06	TRUE	DOWN	ENST00000305366.8
ACTB	25.8576	-1.16996	0.161131	-7.26094	3.84423e-13	9.27938e-11	TRUE	DOWN	ENSG00000075624.17		SLC7A5-201	2.04982	-4.16248	0.711495	-5.85033	4.90586e-09	1.88058e-06	TRUE	DOWN	ENST00000261622.5
RPL37	30.3601	-1.19207	0.143807	-8.28932	1.13901e-16	5.10604e-14	TRUE	DOWN	ENSG00000145592.14		S100A4-201	1.74133	-4.18476	0.729059	-5.73994	9.47075e-09	3.23797e-06	TRUE	DOWN	ENST00000354332.8
ATP5F1E	10.4087	-1.25396	0.238078	-5.267	1.38674e-07	9.88995e-06	TRUE	DOWN	ENSG00000124172.10		S100A6-201	6.86268	-4.44321	0.605792	-7.33454	2.22488e-13	1.87632e-10	TRUE	DOWN	ENST00000368719.9
RPL22L1	4.59804	-1.2977	0.369283	-3.51411	0.000441228	0.0110766	TRUE	DOWN	ENSG00000163584.18		S100A4-204	2.11326	-4.4542	0.718855	-6.19624	5.78293e-10	2.4795e-07	TRUE	DOWN	ENST00000368716.9
PKM	8.69698	-1.30407	0.25975	-5.0205	5.15384e-07	3.23455e-05	TRUE	DOWN	ENSG00000067225.21		CGA-204	2.63415	-4.49654	0.697947	-6.44253	1.17498e-10	6.19313e-08	TRUE	DOWN	ENST00000627148.3
LDHA	13.9025	-1.30445	0.210742	-6.18981	6.0237e-10	7.27014e-08	TRUE	DOWN	ENSG00000134333.15		IFITM3-201	2.46983	-4.68926	0.705616	-6.64563	3.01925e-11	1.81874e-08	TRUE	DOWN	ENST00000399808.5
RMRP	12.6082	-1.30765	0.223834	-5.84204	5.15646e-09	5.05655e-07	TRUE	DOWN	ENSG00000277027.1		S100A6-205	2.84114	-4.91828	0.695211	-7.07452	1.49972e-12	1.11596e-09	TRUE	DOWN	ENST00000496817.5
PGK1	5.98198	-1.332	0.325619	-4.09067	4.30137e-05	0.00168721	TRUE	DOWN	ENSG00000102144.15
HSPD1	19.8131	-1.43365	0.181543	-7.897	2.85693e-15	1.12063e-12	TRUE	DOWN	ENSG00000144381.18
GSTP1	3.9891	-1.44239	0.394734	-3.65408	0.000258109	0.00725147	TRUE	DOWN	ENSG00000084207.18
LMNA	3.27452	-1.44861	0.452674	-3.20011	0.00137377	0.0253582	TRUE	DOWN	ENSG00000160789.24
HSPA9	3.94974	-1.48168	0.397501	-3.72749	0.000193398	0.00594983	TRUE	DOWN	ENSG00000113013.16
NPM1	37.1398	-1.52224	0.144044	-10.5678	4.2011e-26	1.31831e-22	TRUE	DOWN	ENSG00000181163.14
TKT	4.78433	-1.59961	0.366451	-4.36513	1.27046e-05	0.000592784	TRUE	DOWN	ENSG00000163931.17
DSTN	4.53237	-1.66497	0.391718	-4.25042	2.13367e-05	0.000892728	TRUE	DOWN	ENSG00000125868.16
HSPA8	9.18905	-1.70156	0.271529	-6.26659	3.69042e-10	4.63221e-08	TRUE	DOWN	ENSG00000109971.14
SLC38A1	3.61898	-1.70676	0.428459	-3.98349	6.79098e-05	0.00256748	TRUE	DOWN	ENSG00000111371.16
TARS1	2.26717	-1.80797	0.555388	-3.25533	0.00113261	0.0218045	TRUE	DOWN	ENSG00000113407.14
ATP5MC1	2.37864	-1.88072	0.567554	-3.31373	0.000920603	0.019259	TRUE	DOWN	ENSG00000159199.14
CD55	2.74905	-1.91514	0.510891	-3.74863	0.000177803	0.00554999	TRUE	DOWN	ENSG00000196352.18
TXNRD1	2.96717	-1.91566	0.488135	-3.92446	8.69255e-05	0.00309968	TRUE	DOWN	ENSG00000198431.18
TFRC	2.6343	-1.93762	0.533186	-3.63405	0.000279011	0.00761337	TRUE	DOWN	ENSG00000072274.14
TMEM14C	4.0681	-1.98548	0.436248	-4.55127	5.33241e-06	0.000274313	TRUE	DOWN	ENSG00000111843.14
S100A11	5.7871	-1.99803	0.359652	-5.55546	2.76888e-08	2.28651e-06	TRUE	DOWN	ENSG00000163191.6
VMP1	2.36986	-2.0286	0.57483	-3.52905	0.000417058	0.0105543	TRUE	DOWN	ENSG00000062716.13
DPM1	1.62671	-2.0844	0.702139	-2.96865	0.00299111	0.0442741	TRUE	DOWN	ENSG00000000419.14
HMGA1	2.11004	-2.08883	0.607003	-3.44122	0.000579095	0.0135612	TRUE	DOWN	ENSG00000137309.21
EIF3E	1.76507	-2.1189	0.694389	-3.05146	0.00227729	0.0360915	TRUE	DOWN	ENSG00000104408.11
FTL	16.5212	-2.12538	0.219693	-9.67433	3.87608e-22	3.04079e-19	TRUE	DOWN	ENSG00000087086.15
GAL	2.54379	-2.13226	0.582439	-3.66093	0.000251306	0.00716908	TRUE	DOWN	ENSG00000069482.7
MT-TP	2.25629	-2.19489	0.600783	-3.65337	0.000258816	0.00725147	TRUE	DOWN	ENSG00000210196.2
PLA2G4A	1.38234	-2.40148	0.759101	-3.16358	0.00155841	0.0274735	TRUE	DOWN	ENSG00000116711.10
CALD1	2.73054	-2.42474	0.595061	-4.07477	4.60589e-05	0.00178436	TRUE	DOWN	ENSG00000122786.20
LIMCH1	0.884918	-2.58438	0.843078	-3.06541	0.00217368	0.0348011	TRUE	DOWN	ENSG00000064042.18
PRDX5	1.42054	-2.58874	0.74951	-3.45392	0.000552511	0.01321	TRUE	DOWN	ENSG00000126432.14
PLEC	1.14453	-2.63414	0.799519	-3.29465	0.000985428	0.0198223	TRUE	DOWN	ENSG00000178209.17
TNFRSF12A	1.21224	-2.66034	0.778127	-3.4189	0.000628741	0.0143074	TRUE	DOWN	ENSG00000006327.14
CPT1A	1.03756	-2.66989	0.848905	-3.1451	0.00166032	0.0289449	TRUE	DOWN	ENSG00000110090.13
PIR	0.81451	-2.73045	0.874307	-3.12299	0.00179022	0.0306979	TRUE	DOWN	ENSG00000087842.11
EEF1A2	1.61666	-2.7842	0.732333	-3.80183	0.000143632	0.00474439	TRUE	DOWN	ENSG00000101210.14
TGFBI	0.690412	-2.83806	0.970759	-2.92355	0.00346063	0.0493612	TRUE	DOWN	ENSG00000120708.17
DDIT4	1.02719	-2.84861	0.839005	-3.39522	0.000685732	0.0150938	TRUE	DOWN	ENSG00000168209.6
COL3A1	0.685778	-2.86932	0.933923	-3.07233	0.00212395	0.0341793	TRUE	DOWN	ENSG00000168542.16
GNG11	0.660029	-2.87528	0.966215	-2.97582	0.00292205	0.0436887	TRUE	DOWN	ENSG00000127920.6
NPR3	0.84135	-2.89184	0.868974	-3.32787	0.000875118	0.0184303	TRUE	DOWN	ENSG00000113389.16
SLPI	0.956605	-2.89678	0.840545	-3.44631	0.000568299	0.0134084	TRUE	DOWN	ENSG00000124107.5
TCIM	0.906044	-2.93117	0.887633	-3.30224	0.000959176	0.0195527	TRUE	DOWN	ENSG00000176907.5
TPM2	1.19699	-2.96069	0.781775	-3.78715	0.000152388	0.00492983	TRUE	DOWN	ENSG00000198467.16
COL7A1	0.766168	-2.97255	0.904412	-3.28672	0.00101362	0.020027	TRUE	DOWN	ENSG00000114270.18
KYNU	1.68521	-2.98101	0.754944	-3.94865	7.85948e-05	0.0028678	TRUE	DOWN	ENSG00000115919.15
PPDPFL	0.80139	-2.99697	0.905157	-3.311	0.000929641	0.0193193	TRUE	DOWN	ENSG00000168333.14
MRPS30	0.979777	-2.99748	0.853929	-3.51022	0.000447735	0.0111507	TRUE	DOWN	ENSG00000112996.11
HTATIP2	1.01854	-3.04177	0.830432	-3.66288	0.000249398	0.00716908	TRUE	DOWN	ENSG00000109854.14
MBD2	0.741532	-3.06078	0.95291	-3.21204	0.00131796	0.024472	TRUE	DOWN	ENSG00000134046.12
KRT17	1.01531	-3.08413	0.831898	-3.70734	0.000209446	0.00631964	TRUE	DOWN	ENSG00000128422.18
LGALS1	5.41626	-3.16097	0.478674	-6.6036	4.01302e-11	7.87054e-09	TRUE	DOWN	ENSG00000100097.12
BST2	1.3727	-3.16555	0.769552	-4.1135	3.89712e-05	0.00154799	TRUE	DOWN	ENSG00000130303.14
MGST1	1.39889	-3.23958	0.751817	-4.30901	1.63991e-05	0.000724792	TRUE	DOWN	ENSG00000008394.13
SLC7A5	2.51215	-3.27015	0.673269	-4.85713	1.19101e-06	6.92107e-05	TRUE	DOWN	ENSG00000103257.9
PRSS21	0.978381	-3.30235	0.863494	-3.82441	0.000131086	0.00437606	TRUE	DOWN	ENSG00000007038.11
PRSS23	2.28225	-3.37882	0.702375	-4.81056	1.50506e-06	8.58702e-05	TRUE	DOWN	ENSG00000150687.12
LPL	1.01937	-3.46583	0.811955	-4.26851	1.96787e-05	0.000845913	TRUE	DOWN	ENSG00000175445.17
TMSB4X	12.5355	-3.48183	0.339826	-10.2459	1.23422e-24	1.93649e-21	TRUE	DOWN	ENSG00000205542.11
SLC7A11	1.03732	-3.5046	0.838156	-4.18132	2.89816e-05	0.00118109	TRUE	DOWN	ENSG00000151012.13
RIMS1	1.15846	-3.57518	0.7915	-4.51697	6.2731e-06	0.0003175	TRUE	DOWN	ENSG00000079841.20
SRGN	1.41309	-3.6168	0.763117	-4.7395	2.14243e-06	0.000117947	TRUE	DOWN	ENSG00000122862.5
HSPB1	5.00254	-3.70089	0.583079	-6.34716	2.1933e-10	3.12845e-08	TRUE	DOWN	ENSG00000106211.10
OLFM1	1.58399	-3.72597	0.745262	-4.99954	5.7468e-07	3.53597e-05	TRUE	DOWN	ENSG00000130558.20
CTSC	1.66424	-3.74738	0.744538	-5.03315	4.82474e-07	3.0898e-05	TRUE	DOWN	ENSG00000109861.17
KRT81	2.00535	-3.8122	0.719016	-5.30197	1.1456e-07	8.3602e-06	TRUE	DOWN	ENSG00000205426.11
S100A2	1.66139	-3.8488	0.736115	-5.22853	1.70865e-07	1.1915e-05	TRUE	DOWN	ENSG00000196754.13
CPS1	6.46028	-3.93084	0.540699	-7.26992	3.59699e-13	9.27938e-11	TRUE	DOWN	ENSG00000021826.18
ASS1	2.1317	-3.9355	0.717456	-5.48535	4.12648e-08	3.15827e-06	TRUE	DOWN	ENSG00000130707.18
NQO1	1.83694	-3.9757	0.724588	-5.48685	4.09165e-08	3.15827e-06	TRUE	DOWN	ENSG00000181019.13
AKR1C3	2.27732	-3.98589	0.715898	-5.56768	2.58148e-08	2.18937e-06	TRUE	DOWN	ENSG00000196139.14
CASC19	3.79699	-4.0603	0.677193	-5.99578	2.02515e-09	2.26961e-07	TRUE	DOWN	ENSG00000254166.4
CD24	2.0016	-4.06032	0.724916	-5.60109	2.13005e-08	1.85669e-06	TRUE	DOWN	ENSG00000272398.6
BASP1	3.82665	-4.1352	0.674639	-6.12949	8.81614e-10	1.02463e-07	TRUE	DOWN	ENSG00000176788.9
TM4SF1	1.75969	-4.2327	0.726369	-5.8272	5.63641e-09	5.20208e-07	TRUE	DOWN	ENSG00000169908.12
EFEMP1	2.20718	-4.25522	0.713512	-5.96377	2.46483e-09	2.66711e-07	TRUE	DOWN	ENSG00000115380.20
CGA	2.73714	-4.55391	0.701075	-6.49561	8.26952e-11	1.36578e-08	TRUE	DOWN	ENSG00000135346.9
IFITM3	2.45937	-4.67755	0.711263	-6.57639	4.81997e-11	8.88102e-09	TRUE	DOWN	ENSG00000142089.17
S100A4	4.54214	-5.24264	0.682355	-7.68315	1.55229e-14	4.87108e-12	TRUE	DOWN	ENSG00000196154.12
S100A6	10.36	-5.31285	0.625008	-8.50046	1.88837e-17	1.18514e-14	TRUE	DOWN	ENSG00000197956.10
5 hour post-sequencing initiation											5 hour post-sequencing initiation
gene name	gene base mean	log 2 fold change	lfcSE	stat	p-value	p-adjusted	significance	significance_reg	gene ID		transcript name	transcript base mean	log 2 fold change	lfcSE	stat	p-value	p-adjusted	significance	significance_reg	gene ID
IRS4	14.3676	6.7766	0.655738	10.3343	4.92933e-25	2.1116e-22	TRUE	UP	ENSG00000133124.12		IRS4-201	10.1778	6.62989	0.663839	9.98721	1.73396e-23	1.15409e-20	TRUE	UP	ENST00000372129.4
UCHL1	6.39902	6.17623	0.669181	9.22954	2.71802e-20	7.76221e-18	TRUE	UP	ENSG00000154277.13		IRS4-202	10.5196	6.34486	0.660104	9.61191	7.12176e-22	4.09372e-19	TRUE	UP	ENST00000564206.2
XIST	25.1982	5.45764	0.429281	12.7135	4.97799e-37	4.26489e-34	TRUE	UP	ENSG00000229807.13		XIST-223	10.5012	6.33146	0.663633	9.54061	1.41997e-21	7.80735e-19	TRUE	UP	ENST00000650366.1
SLIT2	12.0749	5.38618	0.599609	8.98283	2.63896e-19	6.45979e-17	TRUE	UP	ENSG00000145147.20		NEFL-201	20.1884	6.20677	0.590144	10.5174	7.18322e-26	5.04661e-23	TRUE	UP	ENST00000610854.2
CA2	6.28266	5.27038	0.667278	7.89833	2.8267e-15	4.30537e-13	TRUE	UP	ENSG00000104267.10		XIST-225	12.3209	5.99385	0.644773	9.29607	1.45733e-20	7.37178e-18	TRUE	UP	ENST00000650627.1
RADX	4.73026	5.17758	0.679567	7.61894	2.55767e-14	3.13041e-12	TRUE	UP	ENSG00000147231.14		XIST-218	8.16305	5.95442	0.667826	8.91613	4.82872e-19	2.26163e-16	TRUE	UP	ENST00000648970.1
AFDN	3.187	5.14479	0.69977	7.35212	1.95094e-13	2.08934e-11	TRUE	UP	ENSG00000130396.22		UCHL1-201	4.89498	5.84548	0.677158	8.63237	6.00957e-18	2.45152e-15	TRUE	UP	ENST00000284440.9
CHRM2	3.52209	5.02619	0.688736	7.29771	2.92714e-13	2.99442e-11	TRUE	UP	ENSG00000181072.12		XIST-204	38.9111	5.65054	0.3593	15.7265	9.95315e-56	4.19558e-52	TRUE	UP	ENST00000429829.6
NEFL	4.65185	4.82576	0.675359	7.14547	8.96865e-13	8.6579e-11	TRUE	UP	ENSG00000277586.4		CA2-201	5.7718	5.20003	0.671317	7.74602	9.48176e-15	2.14118e-12	TRUE	UP	ENST00000285379.10
BEX4	2.53033	4.81786	0.712713	6.7599	1.3809e-11	1.16848e-09	TRUE	UP	ENSG00000102409.10		RADX-202	2.48294	4.92315	0.705614	6.97711	3.01307e-12	5.01359e-10	TRUE	UP	ENST00000372548.9
MAGED1	2.31132	4.72412	0.708683	6.66606	2.62766e-11	2.09418e-09	TRUE	UP	ENSG00000179222.18		SLIT2-204	8.55037	4.91676	0.603137	8.15198	3.58014e-16	1.10425e-13	TRUE	UP	ENST00000504154.6
HOXA5	2.13853	4.60862	0.719399	6.40621	1.4918e-10	1.08774e-08	TRUE	UP	ENSG00000106004.5		BEX4-202	2.59736	4.90086	0.709867	6.90392	5.05878e-12	7.63764e-10	TRUE	UP	ENST00000372695.6
MAF	2.0744	4.57187	0.72346	6.31945	2.62489e-10	1.87406e-08	TRUE	UP	ENSG00000178573.7		GPR50-201	2.53943	4.89802	0.708269	6.91548	4.66298e-12	7.28e-10	TRUE	UP	ENST00000218316.4
AMOT	4.5788	4.54851	0.664577	6.84422	7.68923e-12	6.75666e-10	TRUE	UP	ENSG00000126016.17		AMOT-203	2.85964	4.82901	0.699501	6.90351	5.07324e-12	7.63764e-10	TRUE	UP	ENST00000371959.9
CREB5	1.84747	4.47574	0.732534	6.10993	9.96732e-10	6.50629e-08	TRUE	UP	ENSG00000146592.17		MAFB-201	1.94425	4.54055	0.727002	6.24558	4.22227e-10	5.03725e-08	TRUE	UP	ENST00000373313.3
MAFB	1.85882	4.4245	0.729564	6.06457	1.32305e-09	8.47491e-08	TRUE	UP	ENSG00000204103.4		ID4-201	1.89144	4.50972	0.725115	6.21932	4.99321e-10	5.74038e-08	TRUE	UP	ENST00000378700.8
ID4	1.70151	4.31191	0.734446	5.87097	4.33253e-09	2.39477e-07	TRUE	UP	ENSG00000172201.12		HOXA5-201	2.39666	4.50037	0.711879	6.32183	2.58488e-10	3.17363e-08	TRUE	UP	ENST00000222726.4
ECHDC2	2.09387	4.27661	0.726933	5.88308	4.02689e-09	2.26232e-07	TRUE	UP	ENSG00000121310.17		MAF-202	1.88926	4.48434	0.732459	6.1223	9.22328e-10	9.86831e-08	TRUE	UP	ENST00000393350.1
KCNQ1OT1	1.95714	4.14813	0.728918	5.69081	1.26441e-08	6.71802e-07	TRUE	UP	ENSG00000269821.1		XIST-221	4.35059	4.47212	0.67376	6.63756	3.18922e-11	4.24536e-09	TRUE	UP	ENST00000649757.1
RN7SL3	1.54051	4.13206	0.947172	4.36253	1.28568e-05	0.000345572	TRUE	UP	ENSG00000278771.1		XIST-222	2.2932	4.41603	0.719359	6.13884	8.31258e-10	9.06214e-08	TRUE	UP	ENST00000650186.1
ZNF503	5.40956	3.97184	0.581731	6.82762	8.63346e-12	7.49035e-10	TRUE	UP	ENSG00000165655.17		ENST00000625101	1.76313	4.34781	0.739339	5.88067	4.086e-09	3.88508e-07	TRUE	UP	ENST00000625101.1
BEX1	1.32334	3.92447	1.01559	3.86421	0.000111449	0.00207574	TRUE	UP	ENSG00000133169.6		XIST-219	4.70858	4.33209	0.650631	6.6583	2.77021e-11	3.80784e-09	TRUE	UP	ENST00000648991.1
ZNF703	3.76881	3.90825	0.656993	5.94869	2.70302e-09	1.59711e-07	TRUE	UP	ENSG00000183779.7		HSPA1A-202	8.40359	4.31875	0.507113	8.51634	1.6468e-17	6.31074e-15	TRUE	UP	ENST00000608703.1
MFGE8	1.26456	3.80824	0.792246	4.80689	1.53294e-06	5.50092e-05	TRUE	UP	ENSG00000140545.16		SLIT2-212	1.68911	4.31593	0.739358	5.8374	5.3023e-09	4.93036e-07	TRUE	UP	ENST00000622093.4
NID1	1.24599	3.78342	0.775833	4.87659	1.07935e-06	4.02058e-05	TRUE	UP	ENSG00000116962.15		RN7SL3-201	1.66198	4.28978	0.91326	4.69722	2.63727e-06	0.000142525	TRUE	UP	ENST00000610674.1
SOX11	1.19589	3.76825	0.786983	4.78822	1.68264e-06	5.94475e-05	TRUE	UP	ENSG00000176887.7		SOX11-201	1.43186	4.0679	0.759582	5.35545	8.5343e-08	6.50149e-06	TRUE	UP	ENST00000322002.5
AASS	1.17481	3.73066	0.800574	4.65998	3.16235e-06	0.000101759	TRUE	UP	ENSG00000008311.16		FHL1-216	1.80029	4.05874	0.733774	5.53131	3.17839e-08	2.67959e-06	TRUE	UP	ENST00000543669.5
RNF122	1.19596	3.72344	0.779109	4.7791	1.76084e-06	6.18911e-05	TRUE	UP	ENSG00000133874.2		CHRM2-203	1.33721	4.0548	0.764414	5.30445	1.13012e-07	8.50688e-06	TRUE	UP	ENST00000445907.6
HOXD10	1.10895	3.71026	0.812708	4.5653	4.98775e-06	0.000152616	TRUE	UP	ENSG00000128710.6		ZNF703-201	3.95245	4.03224	0.65451	6.1607	7.24237e-10	7.96408e-08	TRUE	UP	ENST00000331569.6
HDGFL3	1.39821	3.61173	0.768352	4.70062	2.59371e-06	8.75728e-05	TRUE	UP	ENSG00000166503.9		BEX1-201	1.35979	4.00845	1.01582	3.94601	7.94657e-05	0.00245103	TRUE	UP	ENST00000372728.4
NEO1	1.08835	3.60842	0.846606	4.26221	2.02411e-05	0.000499031	TRUE	UP	ENSG00000067141.17		HDGFL3-201	1.3661	3.98533	0.770977	5.1692	2.35101e-07	1.67027e-05	TRUE	UP	ENST00000299633.7
AKT3	1.07741	3.59002	0.804798	4.46078	8.16629e-06	0.000230336	TRUE	UP	ENSG00000117020.19		TUBA1A-202	2.44782	3.93297	0.705249	5.57671	2.4511e-08	2.10861e-06	TRUE	UP	ENST00000301071.12
FAM120B	1.01444	3.58997	0.812817	4.4167	1.0022e-05	0.000276661	TRUE	UP	ENSG00000112584.14		TSIX-201	14.3912	3.81987	0.339173	11.2623	2.01369e-29	1.81894e-26	TRUE	UP	ENST00000604411.1
FOXG1	1.04686	3.57568	0.804205	4.44622	8.73928e-06	0.000245488	TRUE	UP	ENSG00000176165.13		HOXD10-201	1.14077	3.79895	0.80945	4.69325	2.68894e-06	0.000144699	TRUE	UP	ENST00000249501.5
HES4	1.61889	3.57528	0.738617	4.8405	1.29511e-06	4.74688e-05	TRUE	UP	ENSG00000188290.11		RNF122-201	1.16464	3.7411	0.784548	4.76847	1.85629e-06	0.000104332	TRUE	UP	ENST00000256257.2
TMSB15A	1.05062	3.57242	0.824043	4.33523	1.45607e-05	0.000383842	TRUE	UP	ENSG00000158164.7		SPEN-AS1-201	1.43226	3.72482	0.76832	4.84801	1.24706e-06	7.26742e-05	TRUE	UP	ENST00000317122.2
FHL1	5.99502	3.54224	0.493271	7.18113	6.91383e-13	6.76962e-11	TRUE	UP	ENSG00000022267.19		HLA-DPB1-211	1.15934	3.67172	0.806612	4.55203	5.31319e-06	0.000267692	TRUE	UP	ENST00000418931.7
TSC22D3	1.94011	3.52494	0.73205	4.81516	1.47084e-06	5.36232e-05	TRUE	UP	ENSG00000157514.18		CACNG8-201	1.09033	3.66486	0.813898	4.50284	6.70502e-06	0.000326122	TRUE	UP	ENST00000270458.4
CACNG8	1.02883	3.52371	0.826379	4.26404	2.00762e-05	0.00049856	TRUE	UP	ENSG00000142408.7		TMSB15A-201	1.08637	3.66045	0.819697	4.46561	7.98402e-06	0.000378149	TRUE	UP	ENST00000289373.5
TLE1	1.01649	3.51664	0.80783	4.35319	1.34171e-05	0.000356437	TRUE	UP	ENSG00000196781.16		AFDN-222	1.12994	3.65072	0.809366	4.51059	6.4648e-06	0.000316876	TRUE	UP	ENST00000515794.3
ZCCHC12	1.30502	3.50761	0.782985	4.4798	7.47133e-06	0.000214261	TRUE	UP	ENSG00000174460.4		ZNF503-201	7.28911	3.64682	0.452762	8.05461	7.97358e-16	2.19204e-13	TRUE	UP	ENST00000372524.5
PCDH10	1.3145	3.5061	0.774257	4.52834	5.94476e-06	0.000177154	TRUE	UP	ENSG00000138650.9		NID1-201	1.10509	3.63507	0.800787	4.53937	5.64233e-06	0.000281333	TRUE	UP	ENST00000264187.7
SLFN11	1.05401	3.50286	0.824897	4.24642	2.17213e-05	0.000527935	TRUE	UP	ENSG00000172716.17		RADX-201	1.33855	3.60537	0.979559	3.6806	0.000232686	0.00613031	TRUE	UP	ENST00000372544.6
MYO6	1.29588	3.49695	0.77054	4.53831	5.67065e-06	0.000170468	TRUE	UP	ENSG00000196586.17		CPE-201	1.35745	3.59764	0.792596	4.53906	5.65068e-06	0.000281333	TRUE	UP	ENST00000402744.9
SMARCA2	1.26063	3.47923	0.777803	4.47316	7.70723e-06	0.000218287	TRUE	UP	ENSG00000080503.25		NT5DC1-201	1.30171	3.59309	0.779116	4.61175	3.99301e-06	0.000205267	TRUE	UP	ENST00000319550.9
DSC3	0.943846	3.46763	0.825807	4.19908	2.67998e-05	0.000631222	TRUE	UP	ENSG00000134762.17		ZCCHC12-201	1.32965	3.58771	0.779586	4.60207	4.18308e-06	0.000214167	TRUE	UP	ENST00000310164.3
MAP1B	0.953306	3.46322	0.852703	4.06147	4.87656e-05	0.00102527	TRUE	UP	ENSG00000131711.15		BHLHE22-201	1.26451	3.58595	0.768851	4.66403	3.10074e-06	0.000164067	TRUE	UP	ENST00000321870.3
AGPAT3	0.998985	3.42995	0.833507	4.11508	3.87052e-05	0.000847557	TRUE	UP	ENSG00000160216.21		EIF4A2-201	4.0175	3.56037	0.59238	6.01027	1.85209e-09	1.90419e-07	TRUE	UP	ENST00000323963.10
CEP43	1.14747	3.42589	0.786407	4.35638	1.32234e-05	0.000352657	TRUE	UP	ENSG00000213066.14		HEY1-202	1.55891	3.5597	0.742282	4.79562	1.62175e-06	9.15564e-05	TRUE	UP	ENST00000354724.8
LIN28B	1.17956	3.41415	0.780342	4.3752	1.2132e-05	0.000329971	TRUE	UP	ENSG00000187772.8		UCHL1-202	1.0068	3.54108	0.843015	4.20049	2.66338e-05	0.001046	TRUE	UP	ENST00000381760.8
HEY1	3.82827	3.41387	0.591085	5.77559	7.66825e-09	4.20465e-07	TRUE	UP	ENSG00000164683.19		MIR222HG-202	0.982022	3.5372	0.834797	4.2372	2.26329e-05	0.000903284	TRUE	UP	ENST00000602507.1
ADGRL2	1.21389	3.40677	1.14371	2.97871	0.00289463	0.0257326	TRUE	UP	ENSG00000117114.21		WDR45B-201	1.54588	3.46033	0.750139	4.61292	3.97052e-06	0.000204944	TRUE	UP	ENST00000392325.9
RNF128	0.891843	3.39566	0.826348	4.10923	3.96979e-05	0.000866527	TRUE	UP	ENSG00000133135.14		EIF4A2-205	1.81149	3.4576	0.72927	4.74118	2.12474e-06	0.000117334	TRUE	UP	ENST00000440191.6
SIMC1	0.936273	3.39215	0.818276	4.14548	3.391e-05	0.000767061	TRUE	UP	ENSG00000170085.18		AP1S2-201	2.18174	3.44605	0.705982	4.88121	1.05437e-06	6.28939e-05	TRUE	UP	ENST00000329235.6
GSTA4	0.875126	3.38108	0.828606	4.08044	4.49513e-05	0.00095682	TRUE	UP	ENSG00000170899.11		LINC00342-209	3.21683	3.43934	0.641227	5.36368	8.15427e-08	6.24963e-06	TRUE	UP	ENST00000661329.1
DZIP1	1.20771	3.37595	0.791062	4.26762	1.9757e-05	0.000494214	TRUE	UP	ENSG00000134874.18		LIN28B-201	1.1555	3.43478	0.78501	4.37546	1.21175e-05	0.000541476	TRUE	UP	ENST00000345080.5
TNC	1.15258	3.36006	0.797771	4.21181	2.53327e-05	0.000600798	TRUE	UP	ENSG00000041982.17		LRATD2-201	1.18189	3.42839	0.785517	4.3645	1.27414e-05	0.000563244	TRUE	UP	ENST00000304916.4
HSPA1A	28.8259	3.35818	0.2142	15.6778	2.14626e-55	3.67762e-52	TRUE	UP	ENSG00000204389.10		HOXD11-201	0.892558	3.42675	0.879201	3.89757	9.71638e-05	0.00291861	TRUE	UP	ENST00000249504.7
SOX4	4.08027	3.33996	0.561746	5.94568	2.75316e-09	1.61283e-07	TRUE	UP	ENSG00000124766.7		CHRM2-208	1.15303	3.38979	0.808345	4.1935	2.74681e-05	0.00106698	TRUE	UP	ENST00000680005.1
DYNC2H1	1.39957	3.33827	0.759712	4.39412	1.11223e-05	0.000303714	TRUE	UP	ENSG00000187240.17		GTF2H2-210	1.14539	3.38916	0.791423	4.28237	1.84916e-05	0.000771764	TRUE	UP	ENST00000521942.5
ANKRD18A	1.40046	3.32452	0.782658	4.24773	2.15945e-05	0.000526721	TRUE	UP	ENSG00000180071.21		SLIT2-202	0.907924	3.3858	0.843964	4.01179	6.02602e-05	0.00193906	TRUE	UP	ENST00000503823.5
EPB41L3	0.865952	3.31627	0.889217	3.72943	0.000191914	0.00313847	TRUE	UP	ENSG00000082397.18		HOXA9-201	2.05913	3.37638	0.710114	4.7547	1.98738e-06	0.000111206	TRUE	UP	ENST00000343483.7
BCL7A	0.902565	3.31452	0.847528	3.91081	9.19866e-05	0.00178059	TRUE	UP	ENSG00000110987.9		MAP1B-201	0.844923	3.36806	0.889039	3.78842	0.000151605	0.004251	TRUE	UP	ENST00000296755.12
C3orf14	0.884956	3.31349	0.881583	3.75857	0.000170885	0.00287069	TRUE	UP	ENSG00000114405.11		XIST-212	0.890289	3.34684	0.880049	3.80302	0.000142944	0.00404399	TRUE	UP	ENST00000647696.1
SLC16A10	0.881443	3.31081	0.839353	3.94447	7.99756e-05	0.00158426	TRUE	UP	ENSG00000112394.18		PCDH10-201	1.1399	3.34216	0.800683	4.17414	2.99115e-05	0.00115676	TRUE	UP	ENST00000264360.7
MYOM2	1.12368	3.29268	0.820931	4.0109	6.04865e-05	0.00122655	TRUE	UP	ENSG00000036448.10		RNF128-201	0.835348	3.33347	0.856421	3.89232	9.92888e-05	0.00295437	TRUE	UP	ENST00000255499.3
CPE	1.41243	3.28613	0.785794	4.18193	2.89049e-05	0.000673858	TRUE	UP	ENSG00000109472.14		FHL1-234	1.36713	3.32308	0.782607	4.24617	2.17459e-05	0.000878588	TRUE	UP	ENST00000651929.2
SIX1	0.826415	3.26807	0.866865	3.76999	0.000163251	0.0027834	TRUE	UP	ENSG00000126778.12		CREB5-201	0.828774	3.32141	0.880961	3.77021	0.000163107	0.00455331	TRUE	UP	ENST00000357727.7
CCDC8	0.86918	3.25574	0.860363	3.78414	0.000154238	0.00268311	TRUE	UP	ENSG00000169515.9		SPEN-202	2.89537	3.31295	0.64239	5.15722	2.50638e-07	1.74876e-05	TRUE	UP	ENST00000438066.2
ZNF711	0.821331	3.21785	0.894366	3.59791	0.000320785	0.00472831	TRUE	UP	ENSG00000147180.17		TLE1-203	0.867506	3.31205	0.860685	3.84815	0.000119011	0.00347578	TRUE	UP	ENST00000376499.8
ANK2	0.855536	3.20062	0.875812	3.65446	0.000257719	0.0039784	TRUE	UP	ENSG00000145362.21		ANKRD18A-210	1.31752	3.25953	0.79329	4.10888	3.97586e-05	0.00143244	TRUE	UP	ENST00000703205.1
HOMER2	0.792665	3.19274	0.861103	3.70773	0.000209122	0.00335726	TRUE	UP	ENSG00000103942.13		MAN1A1-201	1.32149	3.25754	0.775791	4.19899	2.68106e-05	0.00104968	TRUE	UP	ENST00000368468.4
SORT1	1.05616	3.19069	0.808475	3.94655	7.92866e-05	0.00157516	TRUE	UP	ENSG00000134243.12		ZNF503-AS2-201	0.805454	3.22849	0.898289	3.59405	0.000325581	0.0080103	TRUE	UP	ENST00000425916.4
HACE1	0.775564	3.16613	0.90441	3.50076	0.000463927	0.00633417	TRUE	UP	ENSG00000085382.12		JUN-201	2.93673	3.20797	0.65073	4.92979	8.23176e-07	5.05334e-05	TRUE	UP	ENST00000371222.4
DLX2	1.61057	3.16488	0.740399	4.27456	1.91513e-05	0.000482585	TRUE	UP	ENSG00000115844.11		DLX2-201	1.60533	3.20668	0.745441	4.30173	1.69473e-05	0.000714384	TRUE	UP	ENST00000234198.9
GJA1	1.02325	3.15996	0.81852	3.86058	0.000113118	0.00208978	TRUE	UP	ENSG00000152661.9		AMOT-201	1.56054	3.20065	0.747723	4.28053	1.86447e-05	0.000773051	TRUE	UP	ENST00000304758.5
SYK	0.758269	3.15818	0.908636	3.47573	0.000509462	0.00682003	TRUE	UP	ENSG00000165025.15		XIST-216	0.775506	3.19882	0.918614	3.48223	0.000497261	0.0112493	TRUE	UP	ENST00000648829.1
BHLHE22	1.00812	3.15208	0.801039	3.935	8.31981e-05	0.00163862	TRUE	UP	ENSG00000180828.3		ECHDC2-222	0.965662	3.19583	0.863775	3.69985	0.000215729	0.00577989	TRUE	UP	ENST00000539680.1
APPAT	1.21192	3.13991	0.780363	4.02366	5.7301e-05	0.00116887	TRUE	UP	ENSG00000230606.11		MAGED1-201	0.729478	3.18461	0.939016	3.39143	0.00069529	0.0146819	TRUE	UP	ENST00000326587.12
ARID1B	2.75902	3.11672	0.650771	4.78926	1.67394e-06	5.94466e-05	TRUE	UP	ENSG00000049618.25		SLC2A11-216	0.795842	3.17809	0.9291	3.42061	0.000624799	0.0135993	TRUE	UP	ENST00000473357.1
JUN	3.27063	3.1041	0.611994	5.07211	3.93431e-07	1.56097e-05	TRUE	UP	ENSG00000177606.8		MARCKSL1-201	4.4126	3.17537	0.508703	6.2421	4.31748e-10	5.1027e-08	TRUE	UP	ENST00000329421.8
DAPK1	0.743251	3.1002	0.90573	3.42288	0.000619623	0.00793812	TRUE	UP	ENSG00000196730.13		TIMP3-201	0.798261	3.16473	0.888443	3.5621	0.000367896	0.00881947	TRUE	UP	ENST00000266085.7
EPHA6	0.731891	3.09553	0.916226	3.37857	0.000728648	0.00899847	TRUE	UP	ENSG00000080224.18		CDS1-201	0.747443	3.14989	0.969819	3.24792	0.00116253	0.0219664	TRUE	UP	ENST00000295887.6
ZFYVE9	0.777543	3.0912	0.940832	3.28561	0.00101763	0.0116636	TRUE	UP	ENSG00000157077.16		HSPA1B-201	13.8222	3.13695	0.287402	10.9149	9.78897e-28	7.28184e-25	TRUE	UP	ENST00000375650.5
MARCKSL1	4.29623	3.07073	0.509858	6.02271	1.7152e-09	1.06873e-07	TRUE	UP	ENSG00000175130.7		AGPAT3-201	0.75937	3.13091	0.922386	3.39436	0.000687885	0.0145956	TRUE	UP	ENST00000291572.13
DENND4A	0.763137	3.07023	0.893997	3.43427	0.000594157	0.00770613	TRUE	UP	ENSG00000174485.16		HSPA1A-201	22.8633	3.12857	0.220899	14.1629	1.55486e-45	3.93255e-42	TRUE	UP	ENST00000375651.7
NRG1	0.979475	3.06	0.829396	3.68943	0.000224759	0.00357425	TRUE	UP	ENSG00000157168.21		ENST00000520085	0.775665	3.11392	0.940438	3.31114	0.00092918	0.0184465	TRUE	UP	ENST00000520085.2
CDS1	0.720557	3.05705	0.983005	3.1099	0.00187148	0.0185363	TRUE	UP	ENSG00000163624.6		MAGED1-204	0.735926	3.11147	0.891917	3.48852	0.000485697	0.0110669	TRUE	UP	ENST00000375772.7
TBX18	0.750387	3.0545	0.901587	3.38791	0.000704273	0.00874472	TRUE	UP	ENSG00000112837.17		DOCK3-201	0.937226	3.09967	0.826796	3.74901	0.000177533	0.00487041	TRUE	UP	ENST00000266037.10
LARP1B	0.900954	3.04472	0.847811	3.59127	0.000329066	0.00480899	TRUE	UP	ENSG00000138709.20		AEN-201	1.18534	3.09515	0.786946	3.93311	8.38539e-05	0.00254908	TRUE	UP	ENST00000332810.4
PCSK6	1.12223	3.0272	0.791282	3.82569	0.000130405	0.0023583	TRUE	UP	ENSG00000140479.18		MDM4-203	0.729495	3.09427	0.946194	3.27022	0.00107463	0.0205594	TRUE	UP	ENST00000367182.8
AIG1	2.06953	3.02128	0.699167	4.32126	1.55138e-05	0.000404302	TRUE	UP	ENSG00000146416.19		NSMCE3-201	1.15985	3.09273	0.79447	3.89282	9.90847e-05	0.00295437	TRUE	UP	ENST00000332303.6
TIMP3	0.744456	3.00905	0.921923	3.26389	0.00109895	0.0123885	TRUE	UP	ENSG00000100234.12		PTPN9-205	0.749664	3.07755	0.912654	3.37209	0.000746007	0.0154403	TRUE	UP	ENST00000618819.5
NSMCE3	1.12632	3.0061	0.795123	3.78068	0.000156403	0.00270022	TRUE	UP	ENSG00000185115.6		PRRC2B-208	1.20382	3.07438	0.793297	3.87544	0.000106431	0.00314333	TRUE	UP	ENST00000684596.1
TIAM1	0.893534	3.00264	0.858863	3.49607	0.000472165	0.00639569	TRUE	UP	ENSG00000156299.15		MAZ-214	1.43648	3.07429	0.757109	4.06056	4.89549e-05	0.00167774	TRUE	UP	ENST00000568544.5
PLAT	0.691017	3.00133	0.935681	3.20764	0.00133828	0.0144222	TRUE	UP	ENSG00000104368.19		SMO-201	0.742496	3.07201	0.927425	3.31241	0.000924959	0.0184343	TRUE	UP	ENST00000249373.8
TMCC1	1.11893	2.96485	0.800464	3.70392	0.000212296	0.00339179	TRUE	UP	ENSG00000172765.19		ID2-201	1.42886	3.07097	0.762781	4.02602	5.67295e-05	0.00184422	TRUE	UP	ENST00000234091.8
BCL11A	0.716402	2.95872	1.01673	2.91002	0.00361402	0.0302353	TRUE	UP	ENSG00000119866.22		NEFL-202	0.73552	3.0663	0.924582	3.31641	0.000911806	0.0182448	TRUE	UP	ENST00000615973.1
SYNE1	0.923747	2.95797	0.872609	3.3898	0.000699446	0.00870055	TRUE	UP	ENSG00000131018.25		CDT1-201	1.14167	3.06126	0.796004	3.84579	0.000120165	0.00350141	TRUE	UP	ENST00000301019.9
MIR222HG	1.37136	2.94979	0.772803	3.817	0.000135082	0.00241108	TRUE	UP	ENSG00000270069.3		LXN-201	0.716465	3.05647	0.951558	3.21207	0.00131782	0.0240479	TRUE	UP	ENST00000264265.4
PKD2	1.12661	2.94043	0.801841	3.6671	0.00024532	0.00383012	TRUE	UP	ENSG00000118762.8		WTAP-201	0.902185	3.02801	0.863177	3.50798	0.000451526	0.0104771	TRUE	UP	ENST00000337387.4
SEPTIN8	0.83977	2.93393	0.886359	3.31009	0.000932673	0.0109323	TRUE	UP	ENSG00000164402.14		ANKRD36-204	0.902693	3.01985	0.844882	3.57429	0.000351181	0.00849145	TRUE	UP	ENST00000461153.7
MCM3AP	0.857364	2.93289	0.861532	3.40428	0.000663393	0.00837732	TRUE	UP	ENSG00000160294.11		CLEC2D-203	0.952922	3.00881	0.863665	3.48377	0.000494396	0.0112045	TRUE	UP	ENST00000290855.11
MYH10	2.43938	2.92666	0.660936	4.42806	9.50865e-06	0.000266009	TRUE	UP	ENSG00000133026.14		COCH-202	0.681123	3.00723	0.975229	3.08361	0.00204504	0.0338503	TRUE	UP	ENST00000396618.9
POMT1	0.815888	2.91818	0.883981	3.30118	0.000962778	0.0111845	TRUE	UP	ENSG00000130714.19		ENST00000559989	0.674648	3.00058	0.985392	3.04507	0.00232627	0.0371018	TRUE	UP	ENST00000559989.1
UACA	1.67011	2.91579	0.728845	4.00056	6.31932e-05	0.00127017	TRUE	UP	ENSG00000137831.15		CHRM2-202	0.685431	2.99746	0.967935	3.09676	0.00195647	0.0327268	TRUE	UP	ENST00000401861.1
FHIT	0.672986	2.89388	0.988934	2.92626	0.0034306	0.0291367	TRUE	UP	ENSG00000189283.10		SELENOP-214	0.675495	2.99383	0.941588	3.17956	0.00147501	0.0263459	TRUE	UP	ENST00000514985.6
FRAS1	0.670976	2.89017	1.00253	2.88287	0.00394072	0.0319641	TRUE	UP	ENSG00000138759.20		SRCAP-202	0.863572	2.98524	0.852825	3.50041	0.000464544	0.0107006	TRUE	UP	ENST00000411466.7
GGT7	0.873392	2.88851	0.855479	3.37648	0.000734198	0.00902076	TRUE	UP	ENSG00000131067.17		MED6-201	0.655745	2.98161	0.982945	3.03335	0.00241858	0.0381364	TRUE	UP	ENST00000256379.10
ZNF771	1.10375	2.8867	0.804029	3.5903	0.000330304	0.00481681	TRUE	UP	ENSG00000179965.12		ATP5PF-204	0.856244	2.98128	0.875825	3.40397	0.000664142	0.0142469	TRUE	UP	ENST00000400093.3
BEX2	0.634313	2.88536	1.02252	2.82181	0.00477539	0.0366113	TRUE	UP	ENSG00000133134.12		NRARP-201	1.6642	2.97957	0.733746	4.06076	4.89128e-05	0.00167774	TRUE	UP	ENST00000356628.4
WHAMM	1.12803	2.88045	0.814158	3.53796	0.000403238	0.00571032	TRUE	UP	ENSG00000156232.7		TNC-202	0.90834	2.97586	0.861007	3.45625	0.000547739	0.0122164	TRUE	UP	ENST00000350763.9
LXN	0.652555	2.87172	0.984696	2.91635	0.00354152	0.0298935	TRUE	UP	ENSG00000079257.8		SNHG5-225	2.7278	2.95642	0.614223	4.81327	1.48478e-06	8.53477e-05	TRUE	UP	ENST00000654795.1
MGRN1	1.56265	2.87009	0.736859	3.89503	9.81866e-05	0.00186419	TRUE	UP	ENSG00000102858.13		XIST-206	0.675611	2.95289	0.947974	3.11495	0.00183976	0.0313131	TRUE	UP	ENST00000434839.3
NIN	1.07803	2.86273	0.794353	3.60385	0.000313535	0.00468186	TRUE	UP	ENSG00000100503.27		DLGAP5-202	0.816693	2.95065	0.866882	3.40374	0.000664689	0.0142469	TRUE	UP	ENST00000395425.6
DLC1	0.656804	2.85964	0.961382	2.97451	0.00293456	0.0259864	TRUE	UP	ENSG00000164741.15		TICRR-201	1.63462	2.93984	0.733022	4.01057	6.05731e-05	0.00194418	TRUE	UP	ENST00000268138.12
ZNF618	1.36575	2.85327	0.794008	3.5935	0.000326264	0.00477824	TRUE	UP	ENSG00000157657.15		AGAP6-205	0.848775	2.92536	0.884615	3.30693	0.000943245	0.0186671	TRUE	UP	ENST00000618171.5
ZNF620	0.669815	2.85135	1.05481	2.70319	0.00686767	0.0479246	TRUE	UP	ENSG00000177842.12		GJA1-201	0.836673	2.91594	0.870621	3.34927	0.000810251	0.0166069	TRUE	UP	ENST00000282561.4
TNKS	0.637552	2.84878	0.942973	3.02106	0.00251888	0.0230808	TRUE	UP	ENSG00000173273.16		SLC16A10-202	0.644486	2.91536	0.952856	3.0596	0.00221633	0.0360715	TRUE	UP	ENST00000368851.10
NRP1	0.606785	2.84642	1.00384	2.83553	0.00457493	0.0355114	TRUE	UP	ENSG00000099250.18		SOX4-201	5.23985	2.91142	0.438277	6.64287	3.07625e-11	4.13853e-09	TRUE	UP	ENST00000244745.4
MSX2	1.6211	2.84449	0.750869	3.78827	0.000151703	0.00265247	TRUE	UP	ENSG00000120149.9		STX12-201	0.776614	2.89123	0.912924	3.16701	0.00154018	0.0272788	TRUE	UP	ENST00000373943.9
TUBA1A	1.32895	2.84401	0.778903	3.65131	0.000260911	0.00401861	TRUE	UP	ENSG00000167552.15		PEG10-208	1.22624	2.88732	0.799307	3.61228	0.00030352	0.00755574	TRUE	UP	ENST00000615790.5
ADGRV1	0.814477	2.83569	0.910207	3.11543	0.00183675	0.0182716	TRUE	UP	ENSG00000164199.18		ARID1B-218	0.822573	2.88485	0.904195	3.19052	0.00142016	0.0255217	TRUE	UP	ENST00000636748.1
HSPA1B	2.18489	2.83515	0.661998	4.28271	1.84627e-05	0.000470118	TRUE	UP	ENSG00000204388.7		ENST00000701844	8.06087	2.88023	0.362194	7.95219	1.83237e-15	4.82752e-13	TRUE	UP	ENST00000701844.1
ENSG00000289810	0.862881	2.83328	0.900516	3.14629	0.00165358	0.0168155	TRUE	UP	ENSG00000289810.1		KLHL23-202	1.28683	2.87355	0.776248	3.70185	0.000214036	0.00574671	TRUE	UP	ENST00000392647.7
ZNF302	0.821794	2.83145	0.876068	3.232	0.00122929	0.0134211	TRUE	UP	ENSG00000089335.22		SLC16A1-AS1-204	2.29161	2.86793	0.664257	4.3175	1.57804e-05	0.000674184	TRUE	UP	ENST00000428411.6
MCOLN3	1.01652	2.82369	0.809414	3.48856	0.000485626	0.00655212	TRUE	UP	ENSG00000055732.13		ENST00000623860	0.979418	2.86781	0.817221	3.50922	0.000449428	0.0104476	TRUE	UP	ENST00000623860.3
ZNF462	0.795878	2.81649	0.8583	3.28147	0.00103267	0.0117803	TRUE	UP	ENSG00000148143.13		PKD2-201	1.28863	2.86539	0.783828	3.65564	0.000256543	0.00664804	TRUE	UP	ENST00000237596.7
SV2A	0.63896	2.80899	1.02675	2.73581	0.00622262	0.0443807	TRUE	UP	ENSG00000159164.10		ATP11B-201	0.810338	2.85822	0.905299	3.15721	0.00159289	0.0279386	TRUE	UP	ENST00000323116.10
SMARCB1	0.787644	2.80807	0.876431	3.20398	0.00135541	0.0144704	TRUE	UP	ENSG00000099956.20		CDK16-204	1.22745	2.85788	0.792569	3.60584	0.000311145	0.00767006	TRUE	UP	ENST00000457458.6
ZYG11B	2.61969	2.80307	0.620173	4.51982	6.18936e-06	0.000182874	TRUE	UP	ENSG00000162378.13		DEPDC1-201	1.83234	2.85468	0.704592	4.05154	5.08809e-05	0.00171128	TRUE	UP	ENST00000370966.9
LRIG2	0.816534	2.78737	0.869115	3.20714	0.00134063	0.0144249	TRUE	UP	ENSG00000198799.12		SETD6-201	0.969143	2.83698	0.836271	3.39241	0.000692795	0.0146752	TRUE	UP	ENST00000219315.9
SOBP	0.92741	2.78677	0.829758	3.35853	0.000783579	0.00952243	TRUE	UP	ENSG00000112320.12		FBXO5-202	0.799651	2.83184	0.931172	3.04116	0.00235671	0.0374408	TRUE	UP	ENST00000367241.3
UBXN4	4.34665	2.78672	0.474248	5.87608	4.20097e-09	2.34093e-07	TRUE	UP	ENSG00000144224.17		PABPN1-202	1.28061	2.82903	0.778642	3.63329	0.000279826	0.00707736	TRUE	UP	ENST00000397276.6
STX7	1.20236	2.78462	0.789528	3.52694	0.000420392	0.00591657	TRUE	UP	ENSG00000079950.14		ARL10-201	0.779973	2.82893	0.870832	3.24854	0.00116001	0.0219603	TRUE	UP	ENST00000310389.6
PTPRG	0.737787	2.78246	0.961855	2.89281	0.00381815	0.0311915	TRUE	UP	ENSG00000144724.20		HEBP2-204	1.17701	2.82534	0.781834	3.61374	0.000301814	0.00752808	TRUE	UP	ENST00000607197.6
RUFY3	1.50062	2.77804	0.737127	3.76874	0.000164073	0.00278717	TRUE	UP	ENSG00000018189.13		XIST-230	0.761227	2.8216	0.920847	3.06414	0.00218298	0.0356667	TRUE	UP	ENST00000669898.1
KLHL23	1.23527	2.77534	0.775847	3.57718	0.000347318	0.00504348	TRUE	UP	ENSG00000213160.10		MTR-211	0.959814	2.82002	0.848576	3.32323	0.000889806	0.0178328	TRUE	UP	ENST00000679569.1
CDT1	0.984789	2.76906	0.825732	3.35346	0.000798066	0.00966421	TRUE	UP	ENSG00000167513.9		PNPLA2-201	0.755643	2.81779	0.922599	3.05419	0.00225671	0.0362623	TRUE	UP	ENST00000336615.9
ING5	1.01915	2.76557	0.840358	3.29094	0.000998515	0.011527	TRUE	UP	ENSG00000168395.16		MCM9-205	0.778786	2.81512	0.873748	3.22189	0.00127348	0.0234075	TRUE	UP	ENST00000436788.2
MAP3K5	0.837703	2.76325	0.932895	2.96201	0.00305636	0.0268568	TRUE	UP	ENSG00000197442.11		WDR33-204	0.832038	2.80974	0.898388	3.12754	0.00176278	0.0303708	TRUE	UP	ENST00000409658.7
STX12	0.915097	2.76288	0.845627	3.26726	0.00108594	0.0122823	TRUE	UP	ENSG00000117758.14		QKI-204	0.771312	2.80804	0.911179	3.08176	0.00205781	0.0340171	TRUE	UP	ENST00000361758.8
PBX3	1.22027	2.75443	0.775302	3.55272	0.000381266	0.00543285	TRUE	UP	ENSG00000167081.18		GABPA-202	0.736608	2.80127	0.902908	3.1025	0.00191895	0.03227	TRUE	UP	ENST00000400075.4
CNTRL	0.788861	2.75434	0.859032	3.20633	0.0013444	0.014433	TRUE	UP	ENSG00000119397.19		ANKRD26-202	0.775879	2.79783	0.932893	2.99909	0.00270791	0.0417103	TRUE	UP	ENST00000436985.7
MED30	0.960066	2.74888	0.827902	3.3203	0.000899209	0.0106629	TRUE	UP	ENSG00000164758.7		BAZ2A-214	0.747659	2.78728	0.883885	3.15344	0.00161358	0.0282623	TRUE	UP	ENST00000551812.5
NMU	0.599042	2.74862	1.00262	2.74145	0.00611693	0.043901	TRUE	UP	ENSG00000109255.11		FAM228B-202	0.999692	2.77836	0.862185	3.22247	0.00127091	0.0234075	TRUE	UP	ENST00000461972.5
SBF1	0.934722	2.74253	0.829193	3.30746	0.000941451	0.0109927	TRUE	UP	ENSG00000100241.22		SKAP2-201	0.939224	2.77504	0.857671	3.23556	0.00121406	0.0226445	TRUE	UP	ENST00000345317.7
HEBP2	1.15618	2.74144	0.780148	3.51399	0.000441421	0.00611212	TRUE	UP	ENSG00000051620.11		CCDC97-201	0.996901	2.76057	0.829219	3.32912	0.000871218	0.0175437	TRUE	UP	ENST00000269967.4
PCSK5	0.71573	2.74124	0.960241	2.85474	0.00430722	0.033972	TRUE	UP	ENSG00000099139.14		ENTPD7-201	0.779735	2.73814	0.896092	3.05564	0.00224578	0.0362623	TRUE	UP	ENST00000370489.5
MBD1	0.713711	2.74099	0.93806	2.92198	0.00347818	0.0294314	TRUE	UP	ENSG00000141644.19		UACA-201	0.943214	2.72923	0.851288	3.20601	0.00134592	0.0244899	TRUE	UP	ENST00000322954.11
USP11	2.1241	2.74082	0.667968	4.10322	4.07432e-05	0.000880927	TRUE	UP	ENSG00000102226.10		THAP11-201	0.895369	2.71211	0.879309	3.08437	0.00203987	0.0338088	TRUE	UP	ENST00000303596.3
MEGF8	1.06113	2.7408	0.859031	3.19057	0.00141993	0.0150188	TRUE	UP	ENSG00000105429.13		UBALD2-201	1.20037	2.70792	0.795737	3.40303	0.000666428	0.01426	TRUE	UP	ENST00000327490.8
TSHZ1	0.765508	2.7333	0.885548	3.08656	0.00202486	0.0196473	TRUE	UP	ENSG00000179981.11		TLN1-201	1.43951	2.69989	0.756167	3.57049	0.000356312	0.00859908	TRUE	UP	ENST00000314888.10
SPAG5	0.59088	2.72982	1.00515	2.71583	0.006611	0.0464794	TRUE	UP	ENSG00000076382.17		USP11-201	0.708208	2.69616	0.918731	2.93466	0.00333916	0.0488518	TRUE	UP	ENST00000218348.7
SLC16A4	0.739432	2.72413	0.934702	2.91444	0.00356325	0.0300252	TRUE	UP	ENSG00000168679.18		FBRS-202	0.872679	2.68561	0.846002	3.17447	0.00150108	0.0267362	TRUE	UP	ENST00000356166.11
TM2D3	2.13771	2.71409	0.666441	4.07252	4.65066e-05	0.000986862	TRUE	UP	ENSG00000184277.13		GGT7-201	0.744444	2.68534	0.915401	2.93351	0.00335148	0.0489409	TRUE	UP	ENST00000336431.10
IGF2BP2	2.04984	2.71025	0.668583	4.05372	5.04092e-05	0.00104382	TRUE	UP	ENSG00000073792.16		MED30-201	0.901761	2.68459	0.852401	3.14944	0.00163582	0.0285332	TRUE	UP	ENST00000297347.7
MED23	1.02645	2.70307	0.841271	3.21308	0.00131321	0.0142047	TRUE	UP	ENSG00000112282.18		ZNF358-202	0.889509	2.68148	0.857073	3.12865	0.0017561	0.0303383	TRUE	UP	ENST00000597229.2
FOXO3	1.23283	2.69614	0.793898	3.39607	0.000683603	0.00856565	TRUE	UP	ENSG00000118689.15		RBBP7-211	0.919077	2.68052	0.857673	3.12534	0.00177601	0.0304742	TRUE	UP	ENST00000486166.1
PLEKHA1	0.713497	2.69154	0.917964	2.93208	0.00336699	0.0287956	TRUE	UP	ENSG00000107679.15		ZYG11B-201	2.64675	2.67448	0.591293	4.5231	6.09418e-06	0.000302224	TRUE	UP	ENST00000294353.7
REPS1	0.918849	2.6869	0.844489	3.18168	0.00146422	0.0154159	TRUE	UP	ENSG00000135597.19		CLCN3-208	1.06902	2.66851	0.798563	3.34164	0.000832857	0.0169876	TRUE	UP	ENST00000513761.6
SPEN-AS1	0.720249	2.68669	0.925471	2.90305	0.0036955	0.0306597	TRUE	UP	ENSG00000179743.4		LINC02895-201	0.885579	2.6638	0.858813	3.10172	0.00192401	0.0322777	TRUE	UP	ENST00000561161.2
DNAH14	2.11223	2.68119	0.670052	4.00146	6.29536e-05	0.00126907	TRUE	UP	ENSG00000185842.16		ENST00000605920	1.11554	2.66211	0.800009	3.3276	0.000875988	0.0176117	TRUE	UP	ENST00000605920.1
SCML2	0.767407	2.67983	0.919857	2.91332	0.00357613	0.0300746	TRUE	UP	ENSG00000102098.19		CNKSR3-205	1.14038	2.66133	0.82352	3.23166	0.00123075	0.0228884	TRUE	UP	ENST00000607772.6
TARS3	0.749479	2.67725	0.887333	3.01718	0.00255136	0.0233161	TRUE	UP	ENSG00000185418.16		EMC10-201	1.43542	2.65542	0.77022	3.44762	0.000565559	0.0125475	TRUE	UP	ENST00000334976.11
ISYNA1	0.763762	2.67569	0.888761	3.01059	0.00260742	0.0237019	TRUE	UP	ENSG00000105655.19		HOXA10-201	2.71025	2.64514	0.596234	4.43642	9.14685e-06	0.000423704	TRUE	UP	ENST00000283921.5
HEATR6	0.730218	2.66945	0.892394	2.99133	0.00277765	0.0249515	TRUE	UP	ENSG00000068097.16		ZNF512B-201	1.0967	2.6444	0.793621	3.33207	0.000862012	0.0174696	TRUE	UP	ENST00000369888.6
AEN	1.74096	2.66319	0.710014	3.7509	0.0001762	0.00293839	TRUE	UP	ENSG00000181026.15		PI4K2B-201	1.33284	2.64083	0.76343	3.45917	0.000541851	0.0121064	TRUE	UP	ENST00000264864.8
MLF1	1.07735	2.65596	0.800131	3.3194	0.000902107	0.0106788	TRUE	UP	ENSG00000178053.21		EMP2-201	0.898776	2.63826	0.848207	3.11039	0.00186839	0.03163	TRUE	UP	ENST00000342147.4
DLEU2	0.716528	2.65561	0.935908	2.83747	0.00454727	0.035417	TRUE	UP	ENSG00000231607.15		ST20-AS1-201	0.872375	2.63485	0.870235	3.02775	0.00246386	0.0386575	TRUE	UP	ENST00000560255.2
INPP5E	1.65732	2.65473	0.715702	3.70926	0.000207862	0.00335221	TRUE	UP	ENSG00000148384.14		FHL1-204	0.885773	2.6326	0.860546	3.05922	0.00221917	0.0360715	TRUE	UP	ENST00000394153.6
VPS35L	0.888688	2.64915	0.853877	3.10249	0.00191898	0.0188975	TRUE	UP	ENSG00000103544.17		STX7-202	1.24395	2.6225	0.764924	3.42845	0.000607047	0.0133045	TRUE	UP	ENST00000367941.7
TRO	0.717842	2.64738	0.979453	2.70292	0.00687334	0.0479246	TRUE	UP	ENSG00000067445.22		GINM1-201	1.97115	2.61283	0.683815	3.82096	0.000132934	0.00382065	TRUE	UP	ENST00000367419.10
VEZT	1.68199	2.6396	0.726967	3.63097	0.000282354	0.00428851	TRUE	UP	ENSG00000028203.19		GABPA-201	0.800191	2.60752	0.891641	2.9244	0.00345116	0.0498212	TRUE	UP	ENST00000354828.7
TMEM170A	0.904352	2.63691	0.850286	3.10121	0.00192734	0.0189255	TRUE	UP	ENSG00000166822.13		SPEN-201	3.40519	2.60135	0.505665	5.14441	2.6836e-07	1.84439e-05	TRUE	UP	ENST00000375759.8
ZNF430	1.09757	2.63375	0.802634	3.28139	0.00103297	0.0117803	TRUE	UP	ENSG00000118620.13		AIG1-202	1.05364	2.59531	0.804779	3.22487	0.00126031	0.023277	TRUE	UP	ENST00000357847.9
LINC00632	0.709785	2.62999	0.953878	2.75716	0.00583065	0.042334	TRUE	UP	ENSG00000203930.13		CLDND1-201	1.04926	2.59096	0.828975	3.1255	0.00177501	0.0304742	TRUE	UP	ENST00000341181.11
SPEN	4.98036	2.62691	0.42768	6.14222	8.13743e-10	5.36288e-08	TRUE	UP	ENSG00000065526.13		LINC00342-206	0.906011	2.58637	0.859739	3.00833	0.00262691	0.0407607	TRUE	UP	ENST00000660416.1
PLXNA2	0.722407	2.62633	0.907182	2.89504	0.00379105	0.0310859	TRUE	UP	ENSG00000076356.7		FSTL1-201	1.65311	2.58311	0.729	3.54335	0.000395073	0.00939284	TRUE	UP	ENST00000295633.8
TJP1	1.69132	2.61453	0.747684	3.49684	0.000470803	0.00638986	TRUE	UP	ENSG00000104067.17		CCDC14-203	0.901025	2.58124	0.877118	2.94286	0.00325192	0.0479858	TRUE	UP	ENST00000409697.8
SLC15A4	0.709988	2.61141	0.957	2.72875	0.00635753	0.0450616	TRUE	UP	ENSG00000139370.12		CEP43-202	1.07313	2.5755	0.825012	3.12177	0.00179766	0.0307621	TRUE	UP	ENST00000366847.9
METTL5	0.702022	2.60617	0.96777	2.69297	0.00708195	0.0490395	TRUE	UP	ENSG00000138382.15		TM2D3-202	0.877364	2.5732	0.861885	2.98555	0.00283066	0.0430765	TRUE	UP	ENST00000347970.7
NAA30	1.38161	2.60423	0.751122	3.46712	0.000526067	0.00698772	TRUE	UP	ENSG00000139977.14		NEIL3-201	1.19569	2.52211	0.770551	3.27312	0.00106366	0.0204496	TRUE	UP	ENST00000264596.4
FBRS	1.04989	2.60245	0.794039	3.27748	0.00104738	0.0118854	TRUE	UP	ENSG00000156860.16		TMEM18-201	1.03091	2.51998	0.809785	3.11192	0.00185876	0.0315939	TRUE	UP	ENST00000281017.8
ARL6IP6	1.99012	2.59821	0.677436	3.83536	0.000125383	0.00228097	TRUE	UP	ENSG00000177917.12		PTOV1-212	1.324	2.51566	0.772732	3.25553	0.00113179	0.0214904	TRUE	UP	ENST00000599732.5
SHPRH	1.98083	2.59713	0.670934	3.87092	0.000108426	0.00203048	TRUE	UP	ENSG00000146414.17		MAGEF1-201	1.25853	2.51245	0.767881	3.27193	0.00106816	0.0204976	TRUE	UP	ENST00000317897.5
KIF3A	1.32142	2.58571	0.754889	3.42528	0.00061417	0.007883	TRUE	UP	ENSG00000131437.16		HNRNPC-201	1.23157	2.51053	0.773422	3.246	0.00117038	0.0220247	TRUE	UP	ENST00000336053.10
USPL1	0.670407	2.58512	0.93909	2.75279	0.005909	0.0427768	TRUE	UP	ENSG00000132952.12		BAZ1A-202	1.06785	2.508	0.810671	3.09373	0.00197655	0.0329321	TRUE	UP	ENST00000360310.6
PTPN13	0.703262	2.58148	0.937796	2.75271	0.00591036	0.0427768	TRUE	UP	ENSG00000163629.13		NAA30-204	1.24181	2.49505	0.769673	3.2417	0.00118819	0.0222276	TRUE	UP	ENST00000556492.6
ENSG00000278766	0.691438	2.57457	0.920087	2.79818	0.00513918	0.0386228	TRUE	UP	ENSG00000278766.2		OAT-201	3.66562	2.48439	0.488136	5.08955	3.58914e-07	2.4015e-05	TRUE	UP	ENST00000368845.6
SATB2	1.12892	2.56133	0.836107	3.06341	0.00218833	0.0206881	TRUE	UP	ENSG00000119042.18		PTPN4-201	0.978493	2.48426	0.831845	2.98645	0.00282238	0.0430022	TRUE	UP	ENST00000263708.7
PI4K2B	1.3212	2.55919	0.764308	3.34838	0.000812854	0.0097914	TRUE	UP	ENSG00000038210.14		DANT2-206	2.36612	2.46538	0.610508	4.03824	5.38526e-05	0.00177812	TRUE	UP	ENST00000688552.1
TBC1D8	0.859412	2.55469	0.862886	2.96064	0.00307004	0.0269425	TRUE	UP	ENSG00000204634.13		NASP-201	2.31715	2.44882	0.594632	4.11821	3.81827e-05	0.00138765	TRUE	UP	ENST00000350030.8
UBALD2	1.12876	2.54978	0.80328	3.17422	0.00150242	0.0156498	TRUE	UP	ENSG00000185262.9		CENPV-201	0.982368	2.44557	0.822196	2.97443	0.00293529	0.0442956	TRUE	UP	ENST00000299736.5
HOXC4	0.628296	2.54936	0.942609	2.70457	0.00683919	0.0478325	TRUE	UP	ENSG00000198353.8		MSX2-201	1.48908	2.42673	0.739816	3.28018	0.00103742	0.02006	TRUE	UP	ENST00000239243.7
SYNRG	0.862776	2.54298	0.878277	2.89542	0.00378657	0.0310859	TRUE	UP	ENSG00000275066.5		UBXN4-201	2.69417	2.42045	0.545137	4.44008	8.99254e-06	0.000421184	TRUE	UP	ENST00000272638.14
HSF2	0.873446	2.53991	0.843891	3.00976	0.00261452	0.023735	TRUE	UP	ENSG00000025156.13		NFIA-215	2.00665	2.41254	0.641427	3.76121	0.000169094	0.0046812	TRUE	UP	ENST00000603233.2
EHMT1	1.33364	2.53607	0.75981	3.33776	0.000844556	0.0101171	TRUE	UP	ENSG00000181090.21		LMO4-202	1.6785	2.4105	0.691682	3.48499	0.000492164	0.0111941	TRUE	UP	ENST00000370544.10
PIGP	1.88548	2.53257	0.673187	3.76206	0.00016852	0.00284603	TRUE	UP	ENSG00000185808.14		RPA2-203	2.88674	2.40636	0.544763	4.41726	9.99577e-06	0.000457994	TRUE	UP	ENST00000373912.8
TICRR	1.30921	2.52482	0.767453	3.28987	0.00100235	0.011527	TRUE	UP	ENSG00000140534.14		IRF2BPL-201	1.12976	2.40605	0.786235	3.06022	0.00221173	0.0360432	TRUE	UP	ENST00000238647.5
BLTP1	1.20941	2.51709	0.787025	3.19823	0.00138272	0.0146876	TRUE	UP	ENSG00000138688.17		ENST00000567488	2.2576	2.40425	0.605898	3.96808	7.24525e-05	0.00225673	TRUE	UP	ENST00000567488.1
CSNK1D	1.48336	2.51656	0.726991	3.46161	0.000536964	0.0070776	TRUE	UP	ENSG00000141551.15		OPHN1-201	2.14115	2.37796	0.604793	3.93185	8.42938e-05	0.00255019	TRUE	UP	ENST00000355520.6
CENPC	1.94946	2.51586	0.707377	3.5566	0.00037569	0.00538275	TRUE	UP	ENSG00000145241.11		SGCB-201	2.04784	2.36892	0.640631	3.6978	0.00021748	0.00579632	TRUE	UP	ENST00000381431.10
CEP104	1.08833	2.51499	0.802552	3.13374	0.00172593	0.0173963	TRUE	UP	ENSG00000116198.14		GTF2H5-201	1.65863	2.35807	0.695315	3.39137	0.000695432	0.0146819	TRUE	UP	ENST00000607778.2
TTC13	1.08572	2.51299	0.798275	3.14802	0.00164378	0.0167656	TRUE	UP	ENSG00000143643.13		SETX-201	1.41841	2.35795	0.744372	3.1677	0.00153647	0.0272514	TRUE	UP	ENST00000224140.6
PFKL	0.846107	2.49732	0.898335	2.77995	0.00543678	0.0401982	TRUE	UP	ENSG00000141959.17		DDX39B-202	1.38534	2.35533	0.738351	3.18998	0.00142281	0.0255217	TRUE	UP	ENST00000396172.6
SCOC	1.50508	2.49451	0.727826	3.42734	0.000609523	0.00785277	TRUE	UP	ENSG00000153130.18		ENST00000484859	1.13361	2.35438	0.783925	3.00332	0.00267048	0.0412847	TRUE	UP	ENST00000484859.1
USP9X	3.32462	2.48782	0.517898	4.80369	1.55766e-06	5.56051e-05	TRUE	UP	ENSG00000124486.15		MAZ-201	2.50813	2.34909	0.582734	4.03116	5.55027e-05	0.00182307	TRUE	UP	ENST00000219782.11
ATXN1	0.85759	2.48506	0.858397	2.895	0.00379162	0.0310859	TRUE	UP	ENSG00000124788.19		RCN2-203	5.15955	2.33431	0.391123	5.96823	2.39841e-09	2.38821e-07	TRUE	UP	ENST00000394885.8
PCNX4	1.30677	2.48477	0.760021	3.26934	0.00107799	0.0122125	TRUE	UP	ENSG00000126773.13		MATR3-228	1.31836	2.31642	0.75828	3.05483	0.00225185	0.0362623	TRUE	UP	ENST00000361059.7
LINC00342	2.29491	2.48369	0.63967	3.88277	0.000103272	0.00193926	TRUE	UP	ENSG00000232931.6		NUCB2-207	1.33732	2.31214	0.767225	3.01364	0.00258133	0.0401746	TRUE	UP	ENST00000529010.6
SKAP2	0.983839	2.47892	0.851344	2.91177	0.00359384	0.0301495	TRUE	UP	ENSG00000005020.13		NKAP-201	1.35804	2.31168	0.751166	3.07745	0.00208779	0.0343778	TRUE	UP	ENST00000371410.5
RNF8	1.58804	2.47433	0.725864	3.40881	0.000652479	0.0082721	TRUE	UP	ENSG00000112130.17		PGRMC1-202	1.32683	2.29966	0.750483	3.06424	0.00218225	0.0356667	TRUE	UP	ENST00000535419.2
SCAPER	1.06898	2.47255	0.834014	2.96464	0.00303038	0.0266627	TRUE	UP	ENSG00000140386.13		BRD2-202	1.37935	2.29185	0.759792	3.01641	0.00255783	0.0398845	TRUE	UP	ENST00000374831.8
ATP11B	0.822187	2.46262	0.866872	2.84081	0.00449989	0.0352081	TRUE	UP	ENSG00000058063.16		EID2-201	2.16042	2.29074	0.608182	3.76654	0.000165528	0.00461073	TRUE	UP	ENST00000390658.4
DCP2	1.26816	2.45338	0.762318	3.21831	0.00128947	0.0139842	TRUE	UP	ENSG00000172795.17		BSDC1-206	1.40474	2.25554	0.760951	2.96411	0.00303563	0.0453105	TRUE	UP	ENST00000455895.7
RMND1	1.30979	2.45049	0.760711	3.22131	0.00127604	0.0138826	TRUE	UP	ENSG00000155906.20		ARL6IP6-201	1.55698	2.24942	0.704675	3.19214	0.00141224	0.0254768	TRUE	UP	ENST00000326446.10
TFB1M	1.06643	2.4462	0.840804	2.90936	0.00362171	0.0302353	TRUE	UP	ENSG00000029639.11		TXLNA-201	1.31375	2.24942	0.76157	2.95366	0.00314031	0.0465385	TRUE	UP	ENST00000373609.1
ACBD3	0.788688	2.44124	0.863605	2.8268	0.0047015	0.0360852	TRUE	UP	ENSG00000182827.9		ANKRD52-201	1.40132	2.24846	0.75102	2.99387	0.00275461	0.0421728	TRUE	UP	ENST00000267116.8
RSBN1	0.812268	2.43935	0.889343	2.74287	0.00609053	0.0437574	TRUE	UP	ENSG00000081019.14		NASP-224	1.36917	2.24525	0.747221	3.0048	0.00265753	0.0411852	TRUE	UP	ENST00000537798.5
TRPM7	1.00051	2.43835	0.817343	2.98326	0.00285194	0.0254853	TRUE	UP	ENSG00000092439.16		MT1X-201	1.83308	2.24039	0.653163	3.43006	0.000603445	0.0132716	TRUE	UP	ENST00000394485.5
MAGEF1	1.23985	2.42755	0.767155	3.16435	0.00155429	0.0160438	TRUE	UP	ENSG00000177383.5		PPIL4-201	2.1094	2.23758	0.613632	3.64645	0.000265888	0.0068218	TRUE	UP	ENST00000253329.3
AUTS2	1.15361	2.41954	0.798172	3.03135	0.0024346	0.0224586	TRUE	UP	ENSG00000158321.19		HSD17B12-201	3.11354	2.23212	0.49951	4.46862	7.87257e-06	0.000374273	TRUE	UP	ENST00000278353.10
PI4KA	1.03942	2.41936	0.84457	2.8646	0.00417531	0.0330457	TRUE	UP	ENSG00000241973.11		USP11-204	1.31045	2.22964	0.752485	2.96304	0.00304615	0.0453729	TRUE	UP	ENST00000377107.7
LMO4	1.7352	2.41567	0.688774	3.5072	0.00045284	0.00621997	TRUE	UP	ENSG00000143013.13		SCAF8-201	1.80683	2.21859	0.655259	3.38583	0.000709637	0.0149071	TRUE	UP	ENST00000367178.8
LEMD3	1.4338	2.41518	0.742619	3.25224	0.00114498	0.0127397	TRUE	UP	ENSG00000174106.3		TMEM230-201	2.48389	2.2097	0.552708	3.99795	6.38934e-05	0.00201999	TRUE	UP	ENST00000202834.11
TUBGCP5	1.00582	2.41464	0.82547	2.92517	0.00344271	0.0292034	TRUE	UP	ENSG00000275835.5		PCMT1-205	2.04251	2.20433	0.618781	3.56237	0.000367523	0.00881947	TRUE	UP	ENST00000464889.7
PDLIM5	1.16292	2.40849	0.775332	3.1064	0.00189379	0.0187212	TRUE	UP	ENSG00000163110.15		RN7SL5P-201	1.72546	2.19494	0.667548	3.28807	0.00100878	0.0196867	TRUE	UP	ENST00000581458.2
COL6A1	1.13328	2.40804	0.788512	3.05391	0.0022588	0.0212371	TRUE	UP	ENSG00000142156.16		L2HGDH-202	1.94159	2.19253	0.648949	3.37858	0.000728612	0.0151796	TRUE	UP	ENST00000267436.9
PPM1D	1.27402	2.40687	0.783164	3.07327	0.00211729	0.020268	TRUE	UP	ENSG00000170836.13		BRD2-205	1.50628	2.17455	0.703762	3.0899	0.00200227	0.0332729	TRUE	UP	ENST00000449085.4
ULK3	1.00135	2.40403	0.809195	2.97089	0.00296936	0.026193	TRUE	UP	ENSG00000140474.14		ARMT1-201	2.18246	2.16796	0.593944	3.6501	0.000262135	0.00677907	TRUE	UP	ENST00000367294.4
EXOSC6	2.15156	2.39875	0.674912	3.55416	0.00037919	0.00541452	TRUE	UP	ENSG00000223496.3		PSPC1-201	1.50742	2.15873	0.716359	3.01347	0.00258279	0.0401746	TRUE	UP	ENST00000338910.9
USP4	1.01584	2.39809	0.852909	2.81166	0.00492868	0.0374779	TRUE	UP	ENSG00000114316.13		HDDC2-202	1.4313	2.15667	0.723865	2.97939	0.00288826	0.0437949	TRUE	UP	ENST00000398153.7
WWOX	0.975913	2.39733	0.82725	2.89796	0.003756	0.0309791	TRUE	UP	ENSG00000186153.18		ABCB10-201	1.37406	2.14637	0.730987	2.93626	0.00332198	0.0486787	TRUE	UP	ENST00000344517.5
RGPD6	0.815398	2.38235	0.886416	2.68762	0.00719635	0.0493238	TRUE	UP	ENSG00000183054.13		LEMD3-201	1.62795	2.14508	0.67032	3.20008	0.00137388	0.0249004	TRUE	UP	ENST00000308330.3
TLE4	1.15066	2.38199	0.805349	2.9577	0.0030994	0.0271653	TRUE	UP	ENSG00000106829.21		UNG-201	1.63305	2.13951	0.684053	3.1277	0.00176181	0.0303708	TRUE	UP	ENST00000242576.7
MAP3K3	0.969419	2.37971	0.857688	2.77457	0.00552751	0.0407371	TRUE	UP	ENSG00000198909.8		C1orf52-201	1.4523	2.13719	0.718422	2.97484	0.00293143	0.0442901	TRUE	UP	ENST00000294661.8
PDE4DIP	1.42948	2.37941	0.74226	3.20562	0.0013477	0.014433	TRUE	UP	ENSG00000178104.22		PRC1-201	2.70985	2.13387	0.526053	4.05638	4.98397e-05	0.00169511	TRUE	UP	ENST00000361188.9
FAM120AOS	1.25453	2.37414	0.796592	2.98038	0.00287895	0.0256264	TRUE	UP	ENSG00000188938.17		H2AC25-201	1.78002	2.13082	0.66239	3.21686	0.00129601	0.0237872	TRUE	UP	ENST00000366695.3
ID2	2.51486	2.37386	0.567589	4.18236	2.88501e-05	0.000673858	TRUE	UP	ENSG00000115738.10		POLR2D-201	2.16085	2.13041	0.590501	3.60781	0.000308796	0.00762702	TRUE	UP	ENST00000272645.9
NEIL3	1.12804	2.37175	0.777578	3.05017	0.00228709	0.0214364	TRUE	UP	ENSG00000109674.4		HINT3-201	1.41091	2.11832	0.714092	2.96645	0.00301259	0.0451389	TRUE	UP	ENST00000229633.7
CRNDE	1.13271	2.36818	0.794327	2.98136	0.00286968	0.0256104	TRUE	UP	ENSG00000245694.12		C6orf120-201	2.08039	2.10584	0.588314	3.57944	0.000344327	0.00837377	TRUE	UP	ENST00000332290.4
TENM3	0.941974	2.36134	0.865016	2.72982	0.00633689	0.045055	TRUE	UP	ENSG00000218336.9		BLOC1S6-212	2.34581	2.08626	0.560952	3.71914	0.000199905	0.00541326	TRUE	UP	ENST00000566753.5
TMEM181	2.10087	2.355	0.630471	3.7353	0.000187494	0.00307437	TRUE	UP	ENSG00000146433.10		PLS3-208	6.20219	2.07399	0.348968	5.94319	2.79525e-09	2.76162e-07	TRUE	UP	ENST00000539310.5
LINC01515	0.985827	2.35307	0.817546	2.87821	0.00399938	0.0322869	TRUE	UP	ENSG00000228065.13		TSPAN6-201	2.85538	2.05975	0.508695	4.04909	5.14183e-05	0.00171594	TRUE	UP	ENST00000373020.9
RPS6KB1	0.93732	2.34292	0.827644	2.83083	0.00464276	0.0357947	TRUE	UP	ENSG00000108443.14		MED28-201	1.84578	2.05263	0.629068	3.26297	0.00110251	0.0210292	TRUE	UP	ENST00000237380.12
PAN3	1.46828	2.3344	0.74314	3.14126	0.0016822	0.0170812	TRUE	UP	ENSG00000152520.14		BDP1-201	1.86055	2.04608	0.619789	3.30126	0.000962525	0.0189597	TRUE	UP	ENST00000358731.9
FKBP15	2.00706	2.33226	0.647811	3.60022	0.00031795	0.00469715	TRUE	UP	ENSG00000119321.10		PCMT1-203	1.83185	2.03611	0.642446	3.1693	0.00152804	0.0271399	TRUE	UP	ENST00000367384.8
CLK2	1.31038	2.33095	0.766512	3.04099	0.00235805	0.0218865	TRUE	UP	ENSG00000176444.19		SERINC1-201	4.3362	2.03298	0.400532	5.0757	3.86078e-07	2.5562e-05	TRUE	UP	ENST00000339697.5
SGCB	2.07525	2.32946	0.639469	3.64281	0.000269681	0.00411669	TRUE	UP	ENSG00000163069.13		CPOX-204	1.53379	2.02186	0.679144	2.97707	0.00291015	0.0440212	TRUE	UP	ENST00000647941.2
TYK2	1.67265	2.328	0.693058	3.35903	0.000782166	0.00952214	TRUE	UP	ENSG00000105397.15		UNC50-201	1.665	1.9899	0.63802	3.11887	0.00181545	0.0310245	TRUE	UP	ENST00000357765.7
UBR3	1.16385	2.32707	0.790475	2.94389	0.00324113	0.0280843	TRUE	UP	ENSG00000144357.18		CHMP2B-201	1.84828	1.98781	0.629365	3.15844	0.00158617	0.0278981	TRUE	UP	ENST00000263780.9
GABRE	2.92461	2.32657	0.533031	4.36479	1.27245e-05	0.00034336	TRUE	UP	ENSG00000102287.19		DYNLT1-203	6.91098	1.97345	0.317113	6.22316	4.87239e-10	5.65287e-08	TRUE	UP	ENST00000367089.8
CCDC174	0.950709	2.30559	0.844899	2.72884	0.00635574	0.0450616	TRUE	UP	ENSG00000154781.17		WDR5-201	1.86868	1.96886	0.633726	3.10679	0.00189128	0.0319044	TRUE	UP	ENST00000358625.4
INPP4A	1.35474	2.30522	0.762374	3.02374	0.00249675	0.0229253	TRUE	UP	ENSG00000040933.16		WARS2-AS1-209	2.25583	1.96392	0.565557	3.47254	0.000515554	0.0116009	TRUE	UP	ENST00000670000.1
NBPF12	1.01767	2.30486	0.817775	2.81845	0.00482565	0.0368729	TRUE	UP	ENSG00000268043.9		SCO1-201	1.53615	1.96362	0.67087	2.92698	0.00342273	0.0495318	TRUE	UP	ENST00000255390.10
HAUS5	1.17681	2.29612	0.780803	2.94072	0.00327455	0.0282261	TRUE	UP	ENSG00000249115.9		MAP3K2-203	2.08802	1.95437	0.593032	3.29556	0.000982262	0.0192584	TRUE	UP	ENST00000682094.1
STK25	1.61101	2.28496	0.703047	3.25008	0.00115372	0.0128161	TRUE	UP	ENSG00000115694.15		CFAP298-201	1.78785	1.95311	0.629102	3.10461	0.00190533	0.0320836	TRUE	UP	ENST00000290155.8
CCDC18-AS1	1.14625	2.28286	0.803228	2.84211	0.00448158	0.0351048	TRUE	UP	ENSG00000223745.8		PLA2G12A-201	2.03983	1.94794	0.576811	3.37709	0.000732578	0.0152178	TRUE	UP	ENST00000243501.10
ADAT2	1.08383	2.26997	0.785785	2.8888	0.00386718	0.0315168	TRUE	UP	ENSG00000189007.16		PHACTR4-202	1.6432	1.92593	0.637101	3.02295	0.00250323	0.0391296	TRUE	UP	ENST00000373839.8
SLC17A5	0.938777	2.26724	0.842111	2.69233	0.0070954	0.0490428	TRUE	UP	ENSG00000119899.13		ENST00000513408	1.97153	1.91929	0.597303	3.21325	0.00131241	0.0239837	TRUE	UP	ENST00000513408.6
MFSD8	1.11594	2.26395	0.787747	2.87396	0.0040536	0.0324572	TRUE	UP	ENSG00000164073.11		SLC20A1-201	2.08188	1.91528	0.569249	3.36458	0.00076661	0.0157892	TRUE	UP	ENST00000272542.8
CCNB1IP1	1.32988	2.2604	0.757234	2.98508	0.00283503	0.0253673	TRUE	UP	ENSG00000100814.18		WSB1-201	2.36406	1.89988	0.521461	3.64338	0.000269076	0.00688813	TRUE	UP	ENST00000262394.7
ZNF37A	1.12357	2.2586	0.818839	2.75829	0.00581042	0.0422767	TRUE	UP	ENSG00000075407.19		HMGB2-201	9.23083	1.89796	0.270526	7.01583	2.28591e-12	3.85435e-10	TRUE	UP	ENST00000296503.10
CHN1	0.878611	2.24818	0.836282	2.6883	0.00718158	0.0493212	TRUE	UP	ENSG00000128656.15		MPC1-202	3.08228	1.89061	0.466905	4.04923	5.13863e-05	0.00171594	TRUE	UP	ENST00000360961.11
PABIR1	0.899351	2.24225	0.832987	2.69182	0.00710626	0.0490496	TRUE	UP	ENSG00000187866.10		IREB2-201	2.86254	1.89003	0.499227	3.78592	0.000153142	0.0042846	TRUE	UP	ENST00000258886.13
RPA2	2.99741	2.24148	0.523462	4.28203	1.85194e-05	0.000470118	TRUE	UP	ENSG00000117748.10		TSPAN3-201	4.20703	1.88346	0.399926	4.70952	2.48297e-06	0.000135034	TRUE	UP	ENST00000267970.9
NR6A1	0.895409	2.23871	0.833162	2.68701	0.00720953	0.0493648	TRUE	UP	ENSG00000148200.17		PTGFRN-201	2.11138	1.87883	0.572756	3.28034	0.00103684	0.02006	TRUE	UP	ENST00000393203.3
FANCB	1.55881	2.23162	0.705439	3.16344	0.00155915	0.0160698	TRUE	UP	ENSG00000181544.16		HACD3-201	9.5297	1.87647	0.265416	7.0699	1.55042e-12	2.72313e-10	TRUE	UP	ENST00000261875.10
MFSD14CP	1.86929	2.22099	0.650783	3.4128	0.000642992	0.00817638	TRUE	UP	ENSG00000290770.1		DDX39B-215	2.78142	1.86745	0.501629	3.72278	0.000197043	0.00537028	TRUE	UP	ENST00000462256.5
FANCA	1.89268	2.21918	0.653959	3.39345	0.00069017	0.00861643	TRUE	UP	ENSG00000187741.16		ANKRD36C-201	2.02278	1.86739	0.571587	3.26703	0.00108681	0.0207611	TRUE	UP	ENST00000295246.7
ARMT1	2.56738	2.20926	0.56826	3.88776	0.000101173	0.0019103	TRUE	UP	ENSG00000146476.11		FBXO5-201	1.71684	1.86175	0.634791	2.93285	0.00335867	0.048955	TRUE	UP	ENST00000229758.8
CACHD1	1.06156	2.20382	0.797212	2.7644	0.00570269	0.0415811	TRUE	UP	ENSG00000158966.16		TMEM242-202	1.98036	1.83935	0.597096	3.0805	0.00206657	0.0341172	TRUE	UP	ENST00000400788.9
USP22	1.63233	2.18814	0.716031	3.05593	0.00224364	0.0211235	TRUE	UP	ENSG00000124422.12		TMEM192-201	2.12944	1.80654	0.556382	3.24695	0.00116649	0.0219842	TRUE	UP	ENST00000306480.11
H2AC25	1.87579	2.18473	0.654727	3.33685	0.000847336	0.0101178	TRUE	UP	ENSG00000181218.6		DDX39B-214	2.2034	1.79972	0.544801	3.30344	0.00095506	0.0188419	TRUE	UP	ENST00000458640.5
DNAJC11	1.36761	2.17533	0.75896	2.8662	0.00415426	0.0330317	TRUE	UP	ENSG00000007923.17		ILF3-216	1.85352	1.78228	0.603464	2.95341	0.0031428	0.0465385	TRUE	UP	ENST00000589998.6
WRNIP1	1.28523	2.17157	0.754584	2.87784	0.00400407	0.0322869	TRUE	UP	ENSG00000124535.16		C4orf3-202	2.12862	1.78076	0.568692	3.13132	0.00174022	0.0301162	TRUE	UP	ENST00000504110.2
OAT	4.2332	2.16866	0.427458	5.07339	3.90794e-07	1.56097e-05	TRUE	UP	ENSG00000065154.12		HELLS-202	2.8773	1.77489	0.48847	3.63356	0.00027954	0.00707736	TRUE	UP	ENST00000371327.3
SP2	1.08851	2.16533	0.793914	2.72742	0.00638325	0.0451971	TRUE	UP	ENSG00000167182.16		API5-208	1.84779	1.76773	0.603057	2.93127	0.00337577	0.0490126	TRUE	UP	ENST00000531273.6
GJC1	1.49341	2.15942	0.700037	3.08472	0.00203746	0.0196686	TRUE	UP	ENSG00000182963.11		SFT2D1-201	5.99152	1.75872	0.32718	5.37539	7.64157e-08	5.92854e-06	TRUE	UP	ENST00000361731.4
BSDC1	3.10856	2.15146	0.508544	4.23062	2.33045e-05	0.000560453	TRUE	UP	ENSG00000160058.19		RPS2-211	3.20339	1.75639	0.446537	3.93335	8.37698e-05	0.00254908	TRUE	UP	ENST00000531065.5
DCXR	2.1946	2.14738	0.596464	3.60019	0.000317986	0.00469715	TRUE	UP	ENSG00000169738.8		SCARNA2-201	5.06659	1.74961	0.368763	4.74454	2.08982e-06	0.000116422	TRUE	UP	ENST00000458748.1
PPP1R7	1.9555	2.1391	0.620196	3.44906	0.000562534	0.00734401	TRUE	UP	ENSG00000115685.15		CFAP69-210	3.17499	1.74885	0.459449	3.8064	0.000141005	0.0039981	TRUE	UP	ENST00000475031.5
SRGAP2B	1.19528	2.13889	0.771177	2.77354	0.00554506	0.0408226	TRUE	UP	ENSG00000196369.12		TSPYL1-201	3.61873	1.74725	0.431154	4.0525	5.06742e-05	0.00171128	TRUE	UP	ENST00000368608.4
FAM8A1	1.23664	2.13192	0.76091	2.80181	0.00508173	0.0383177	TRUE	UP	ENSG00000137414.7		ATP6V1G2-DDX39B-201	2.35912	1.74477	0.52769	3.30643	0.000944937	0.0186714	TRUE	UP	ENST00000376185.5
TAX1BP1	1.20059	2.12855	0.791079	2.69069	0.00713039	0.0491667	TRUE	UP	ENSG00000106052.14		CKAP5-210	1.88596	1.73992	0.580223	2.99872	0.0027112	0.0417103	TRUE	UP	ENST00000529230.6
PRRC2B	1.48476	2.12707	0.707529	3.00633	0.00264422	0.0239729	TRUE	UP	ENSG00000288701.1		PEG10-202	3.2526	1.73134	0.44118	3.92435	8.69646e-05	0.00262471	TRUE	UP	ENST00000482108.1
EID2	2.05605	2.12424	0.614955	3.4543	0.000551727	0.00721667	TRUE	UP	ENSG00000176396.11		HDLBP-201	2.1437	1.72777	0.555424	3.11072	0.00186633	0.03163	TRUE	UP	ENST00000310931.10
CPSF6	2.96672	2.12058	0.502578	4.21941	2.44945e-05	0.000582934	TRUE	UP	ENSG00000111605.18		MCM2-201	4.32121	1.71864	0.389918	4.4077	1.04473e-05	0.000472974	TRUE	UP	ENST00000265056.12
ABHD2	1.32846	2.10746	0.760441	2.77137	0.00558205	0.0410068	TRUE	UP	ENSG00000140526.18		RCC2-202	3.60077	1.70471	0.426025	4.00144	6.2959e-05	0.00200549	TRUE	UP	ENST00000375436.9
PPIL4	2.28983	2.10196	0.580318	3.62209	0.000292231	0.00442152	TRUE	UP	ENSG00000131013.4		KDM5A-201	2.52527	1.7003	0.510392	3.33137	0.000864203	0.0174765	TRUE	UP	ENST00000399788.7
RAB3GAP1	1.47926	2.09457	0.712442	2.93999	0.0032822	0.0282261	TRUE	UP	ENSG00000115839.19		SSRP1-201	3.57513	1.69971	0.426085	3.98914	6.63139e-05	0.00208608	TRUE	UP	ENST00000278412.7
MSMO1	1.26586	2.09393	0.764686	2.73829	0.00617605	0.0441865	TRUE	UP	ENSG00000052802.13		FBXO22-201	3.1384	1.69473	0.450593	3.7611	0.000169169	0.0046812	TRUE	UP	ENST00000308275.8
AGO1	1.23898	2.09087	0.776135	2.69395	0.00706116	0.048985	TRUE	UP	ENSG00000092847.14		PLS3-202	14.4798	1.68772	0.209168	8.06876	7.10146e-16	1.99567e-13	TRUE	UP	ENST00000355899.8
CCM2	1.30323	2.08837	0.761929	2.7409	0.00612718	0.0439286	TRUE	UP	ENSG00000136280.17		ELAVL1-201	2.57196	1.68068	0.488346	3.44158	0.000578318	0.0128081	TRUE	UP	ENST00000407627.7
FBXO22	3.20171	2.08691	0.472289	4.41871	9.92897e-06	0.000275519	TRUE	UP	ENSG00000167196.14		SRSF4-201	2.64201	1.67068	0.487403	3.42772	0.000608663	0.0133169	TRUE	UP	ENST00000373795.7
ZDHHC17	1.42351	2.08583	0.705526	2.95642	0.00311235	0.027241	TRUE	UP	ENSG00000186908.15		RBBP4-202	8.46404	1.66983	0.278224	6.00176	1.95196e-09	1.99068e-07	TRUE	UP	ENST00000373493.10
SESN2	1.18597	2.08256	0.77355	2.69221	0.00709811	0.0490428	TRUE	UP	ENSG00000130766.5		MMGT1-201	2.10411	1.66083	0.553465	3.00078	0.0026929	0.0415805	TRUE	UP	ENST00000305963.3
BRIP1	1.24481	2.0822	0.760726	2.73713	0.00619787	0.0442502	TRUE	UP	ENSG00000136492.10		CSRP2-201	2.16416	1.65962	0.557437	2.97723	0.00290865	0.0440212	TRUE	UP	ENST00000311083.10
CCNT2	1.60304	2.08125	0.682595	3.04903	0.00229581	0.021438	TRUE	UP	ENSG00000082258.13		HDAC2-205	5.5581	1.6578	0.335593	4.93991	7.81575e-07	4.86886e-05	TRUE	UP	ENST00000519065.6
MDM4	2.7087	2.07404	0.537058	3.86185	0.000112532	0.00208732	TRUE	UP	ENSG00000198625.14		SCARNA9-201	4.56644	1.65316	0.37665	4.3891	1.13821e-05	0.000510417	TRUE	UP	ENST00000530422.1
ABCB10	1.38913	2.0725	0.736964	2.81221	0.00492023	0.0374703	TRUE	UP	ENSG00000135776.5		GASK1A-211	4.00866	1.65283	0.398159	4.15117	3.30787e-05	0.00124129	TRUE	UP	ENST00000690717.1
PIK3C2A	1.92309	2.06844	0.64849	3.18963	0.00142455	0.0150444	TRUE	UP	ENSG00000011405.14		QKI-203	2.05877	1.6514	0.551453	2.99463	0.00274777	0.0421191	TRUE	UP	ENST00000361752.8
FRA10AC1	1.46269	2.06697	0.710681	2.90844	0.0036324	0.0302509	TRUE	UP	ENSG00000148690.12		ARIH1-201	2.48806	1.63957	0.515486	3.18064	0.00146952	0.026285	TRUE	UP	ENST00000379887.9
LTN1	1.37301	2.06628	0.723996	2.854	0.00431728	0.0340123	TRUE	UP	ENSG00000198862.14		MRPL39-202	5.14549	1.62074	0.352939	4.59212	4.38769e-06	0.000223737	TRUE	UP	ENST00000352957.9
EIF2AK1	1.61115	2.06271	0.672041	3.06933	0.00214541	0.0204231	TRUE	UP	ENSG00000086232.13		SLC31A1-201	2.54286	1.61547	0.495802	3.25828	0.00112088	0.0213153	TRUE	UP	ENST00000374212.5
WTAP	1.25458	2.05953	0.765761	2.68952	0.00715556	0.0492272	TRUE	UP	ENSG00000146457.16		ZNF584-DT-202	3.75167	1.61225	0.40512	3.97967	6.90097e-05	0.0021655	TRUE	UP	ENST00000593393.1
DYNLT1	7.19422	2.05081	0.317041	6.46859	9.89227e-11	7.36974e-09	TRUE	UP	ENSG00000146425.11		BEX3-204	4.30232	1.61177	0.394761	4.08291	4.44757e-05	0.00156233	TRUE	UP	ENST00000372645.3
PCNT	1.3899	2.04876	0.710151	2.88496	0.00391464	0.0317902	TRUE	UP	ENSG00000160299.19		HMGB2-203	2.04042	1.59533	0.538793	2.96094	0.00306701	0.0456213	TRUE	UP	ENST00000446922.6
CAMTA1	2.1289	2.04657	0.585638	3.49459	0.000474783	0.00641846	TRUE	UP	ENSG00000171735.20		USP22-201	2.42337	1.59489	0.504761	3.1597	0.00157931	0.0278161	TRUE	UP	ENST00000261497.9
OCRL	1.35897	2.044	0.734546	2.78267	0.00539129	0.0399912	TRUE	UP	ENSG00000122126.18		SPAG5-201	2.1145	1.58882	0.53535	2.96781	0.00299931	0.0451002	TRUE	UP	ENST00000321765.10
SPRTN	1.73472	2.04394	0.673504	3.03479	0.00240704	0.0222944	TRUE	UP	ENSG00000010072.16		MZT2B-201	3.62582	1.58297	0.40851	3.87498	0.000106634	0.00314333	TRUE	UP	ENST00000281871.11
EFNA5	1.38421	2.03306	0.717773	2.83245	0.00461925	0.0356937	TRUE	UP	ENSG00000184349.14		PUS7L-201	2.60538	1.57683	0.497421	3.17	0.00152438	0.0271129	TRUE	UP	ENST00000344862.10
CIZ1	1.85193	2.02946	0.623044	3.25733	0.00112465	0.0126367	TRUE	UP	ENSG00000148337.22		CDC23-202	2.38689	1.57277	0.502289	3.13121	0.00174086	0.0301162	TRUE	UP	ENST00000394886.7
SRP68	1.67214	2.02508	0.674649	3.00168	0.00268495	0.0242458	TRUE	UP	ENSG00000167881.15		DARS1-201	4.19678	1.56814	0.377416	4.15493	3.25384e-05	0.0012283	TRUE	UP	ENST00000264161.9
ORC4	1.89342	2.01858	0.619816	3.25674	0.001127	0.0126423	TRUE	UP	ENSG00000115947.14		INIP-203	2.39046	1.56806	0.514432	3.04813	0.00230271	0.0368608	TRUE	UP	ENST00000374242.9
TMEM192	2.01057	2.01849	0.593971	3.39831	0.000678043	0.00852717	TRUE	UP	ENSG00000170088.14		NFATC2IP-201	2.89849	1.54293	0.457237	3.37446	0.000739595	0.0153327	TRUE	UP	ENST00000320805.9
SLC16A1-AS1	2.59061	2.01543	0.53614	3.75914	0.000170497	0.00287069	TRUE	UP	ENSG00000226419.8		RPS24-202	5.29155	1.53052	0.340247	4.49827	6.85088e-06	0.000330673	TRUE	UP	ENST00000372360.9
RRM1	1.97004	2.01198	0.618041	3.25541	0.00113229	0.0126602	TRUE	UP	ENSG00000167325.15		NCBP1-202	2.8712	1.52914	0.471678	3.2419	0.00118734	0.0222276	TRUE	UP	ENST00000375147.8
DNM2	1.92427	2.01194	0.622016	3.23455	0.00121833	0.0134036	TRUE	UP	ENSG00000079805.19		PGRMC1-201	12.568	1.52826	0.223082	6.85068	7.3501e-12	1.08081e-09	TRUE	UP	ENST00000217971.8
HDDC2	1.95725	2.00779	0.604624	3.32072	0.000897858	0.0106629	TRUE	UP	ENSG00000111906.18		PRC1-202	3.5819	1.52753	0.417092	3.66232	0.000249938	0.00650352	TRUE	UP	ENST00000394249.8
EPHA7	2.43469	2.00379	0.535534	3.74167	0.000182801	0.00302637	TRUE	UP	ENSG00000135333.15		HMGB3-201	4.68349	1.51235	0.355264	4.25698	2.0721e-05	0.000845283	TRUE	UP	ENST00000325307.12
TSPAN6	3.07004	2.00286	0.48888	4.09683	4.18838e-05	0.000897099	TRUE	UP	ENSG00000000003.15		DFFA-202	2.61178	1.50781	0.48521	3.10754	0.00188651	0.0318941	TRUE	UP	ENST00000377038.8
GTPBP3	1.71712	1.9961	0.667656	2.98972	0.00279236	0.0250379	TRUE	UP	ENSG00000130299.17		RN7SL1-201	33.9535	1.50243	0.291046	5.16217	2.44107e-07	1.71499e-05	TRUE	UP	ENST00000618786.1
PSPC1	1.87805	1.99558	0.630316	3.166	0.00154553	0.0159928	TRUE	UP	ENSG00000121390.19		ENST00000602755	5.15373	1.50196	0.342162	4.38962	1.13547e-05	0.000510417	TRUE	UP	ENST00000602755.1
AK3	1.39256	1.99165	0.713997	2.78944	0.00527987	0.0392923	TRUE	UP	ENSG00000147853.17		IGF2BP1-201	3.42706	1.49091	0.408873	3.64639	0.000265946	0.0068218	TRUE	UP	ENST00000290341.8
CCNDBP1	1.3642	1.97822	0.733536	2.69683	0.00700026	0.048661	TRUE	UP	ENSG00000166946.14		DDX17-201	3.03491	1.48556	0.452797	3.28084	0.00103499	0.02006	TRUE	UP	ENST00000216019.11
AGO3	2.29194	1.97786	0.563519	3.50984	0.000448381	0.00619597	TRUE	UP	ENSG00000126070.20		SOD2-210	4.76568	1.47164	0.358865	4.10081	4.11699e-05	0.00146246	TRUE	UP	ENST00000538183.7
LIG1	1.76893	1.96716	0.630934	3.11786	0.00182171	0.0181966	TRUE	UP	ENSG00000105486.15		PM20D2-201	3.26223	1.46593	0.442643	3.31176	0.000927107	0.0184343	TRUE	UP	ENST00000275072.5
TSPAN3	5.44394	1.96663	0.357798	5.49648	3.87457e-08	1.80655e-06	TRUE	UP	ENSG00000140391.15		NUP133-201	3.20361	1.4623	0.433019	3.37699	0.00073285	0.0152178	TRUE	UP	ENST00000261396.6
SETX	2.11412	1.96661	0.595262	3.30377	0.000953943	0.0111007	TRUE	UP	ENSG00000107290.14		OLA1-201	3.6985	1.44535	0.41377	3.49312	0.000477418	0.0109374	TRUE	UP	ENST00000284719.8
PPP4C	3.45753	1.96406	0.460382	4.26616	1.98868e-05	0.000495652	TRUE	UP	ENSG00000149923.14		MCM6-201	4.68282	1.4393	0.352346	4.08492	4.4092e-05	0.00155751	TRUE	UP	ENST00000264156.3
SLC6A15	1.37279	1.96226	0.714569	2.74607	0.00603138	0.0433778	TRUE	UP	ENSG00000072041.18		ASB3-203	3.10944	1.436	0.441241	3.25446	0.00113608	0.0215396	TRUE	UP	ENST00000406053.5
CTDSPL2	1.81993	1.94189	0.63444	3.0608	0.00220747	0.0208402	TRUE	UP	ENSG00000137770.14		MFSD14B-201	3.33841	1.43389	0.419177	3.42071	0.000624574	0.0135993	TRUE	UP	ENST00000375344.8
WSB1	4.28239	1.94045	0.396897	4.88905	1.01325e-06	3.79499e-05	TRUE	UP	ENSG00000109046.15		EXOSC6-201	3.37263	1.43281	0.433157	3.30783	0.000940204	0.0186361	TRUE	UP	ENST00000435634.3
ZNF431	1.59309	1.93639	0.674688	2.87005	0.00410411	0.0327469	TRUE	UP	ENSG00000196705.8		PMAIP1-202	2.8724	1.42972	0.446681	3.20077	0.00137063	0.0249004	TRUE	UP	ENST00000316660.7
CCDC14	2.31856	1.93125	0.56658	3.40862	0.000652933	0.0082721	TRUE	UP	ENSG00000175455.16		H2AC19-201	3.69375	1.42077	0.40541	3.50453	0.000457407	0.0105747	TRUE	UP	ENST00000607355.3
SERINC1	4.20194	1.92805	0.400731	4.81132	1.49934e-06	5.40868e-05	TRUE	UP	ENSG00000111897.7		INTU-201	4.79307	1.41504	0.347657	4.07021	4.69704e-05	0.00162292	TRUE	UP	ENST00000335251.11
RCN2	5.3579	1.92483	0.360681	5.33665	9.46796e-08	4.08135e-06	TRUE	UP	ENSG00000117906.14		SPC25-201	2.92748	1.40302	0.451619	3.10666	0.00189217	0.0319044	TRUE	UP	ENST00000282074.7
GTF2H5	2.43671	1.92013	0.54073	3.55099	0.00038378	0.00544602	TRUE	UP	ENSG00000272047.4		DEGS1-201	3.9687	1.39727	0.389592	3.58648	0.000335167	0.00818246	TRUE	UP	ENST00000323699.9
TMEM30A	2.06052	1.91015	0.565735	3.3764	0.000734401	0.00902076	TRUE	UP	ENSG00000112697.17		NEAT1-202	13.9151	1.39032	0.205665	6.76011	1.3789e-11	1.95928e-09	TRUE	UP	ENST00000501122.2
CLASP2	1.71685	1.90716	0.650138	2.93346	0.00335205	0.0287187	TRUE	UP	ENSG00000163539.18		FUS-206	2.93296	1.38752	0.456404	3.04012	0.00236484	0.0375228	TRUE	UP	ENST00000487509.6
ARIH1	1.59022	1.90119	0.675887	2.81288	0.00491004	0.0374528	TRUE	UP	ENSG00000166233.15		MARCKS-201	7.64863	1.38618	0.368328	3.76344	0.00016759	0.0046579	TRUE	UP	ENST00000612661.2
EIF4G3	3.93296	1.89806	0.415219	4.57122	4.84892e-06	0.000149705	TRUE	UP	ENSG00000075151.24		TPI1-202	3.01401	1.38012	0.453293	3.04465	0.0023295	0.0371018	TRUE	UP	ENST00000396705.10
RN7SL5P	2.2306	1.89657	0.590373	3.2125	0.00131585	0.0142047	TRUE	UP	ENSG00000265735.2		SRSF5-207	2.98954	1.37225	0.446999	3.06992	0.00214115	0.0351194	TRUE	UP	ENST00000554465.5
NUCB2	1.81686	1.88893	0.628462	3.00565	0.00265015	0.0239949	TRUE	UP	ENSG00000070081.18		LINC03033-201	5.14688	1.35348	0.349835	3.8689	0.000109326	0.0032152	TRUE	UP	ENST00000229465.10
SAMD4B	1.53879	1.88364	0.67727	2.78122	0.00541549	0.040084	TRUE	UP	ENSG00000179134.16		BTF3L4-201	4.54892	1.33383	0.362935	3.67511	0.000237748	0.00623286	TRUE	UP	ENST00000313334.13
UBR4	2.08655	1.87426	0.591559	3.16834	0.00153312	0.0158971	TRUE	UP	ENSG00000127481.15		HMGN2-201	22.2419	1.32996	0.167147	7.95681	1.76532e-15	4.74984e-13	TRUE	UP	ENST00000361427.6
ZNF714	2.31243	1.86646	0.537358	3.4734	0.000513915	0.00686623	TRUE	UP	ENSG00000160352.16		RPL39-201	3.96408	1.32556	0.385775	3.43611	0.000590137	0.013047	TRUE	UP	ENST00000361575.4
PHF8	1.75247	1.86421	0.658749	2.82992	0.00465591	0.0358155	TRUE	UP	ENSG00000172943.21		MORF4L1-202	3.02742	1.32464	0.431847	3.06738	0.00215941	0.0353729	TRUE	UP	ENST00000379535.8
HNRNPUL1	2.34755	1.8564	0.537363	3.45465	0.000551013	0.00721667	TRUE	UP	ENSG00000105323.18		GLO1-201	9.80591	1.32303	0.243986	5.42255	5.87534e-08	4.67292e-06	TRUE	UP	ENST00000373365.5
MIR3648-1	3.75959	1.85309	0.431452	4.29501	1.74685e-05	0.000448423	TRUE	UP	ENSG00000275708.1		BEX3-201	7.43358	1.30805	0.277488	4.71389	2.43035e-06	0.000133627	TRUE	UP	ENST00000361298.9
HTT	1.51935	1.85136	0.678098	2.73022	0.00632921	0.0450471	TRUE	UP	ENSG00000197386.14		PPP4R2-201	3.32832	1.29403	0.423645	3.05452	0.00225421	0.0362623	TRUE	UP	ENST00000356692.10
POLE2	1.52588	1.84609	0.685538	2.6929	0.00708332	0.0490395	TRUE	UP	ENSG00000100479.14		SF3B5-201	5.55202	1.28921	0.422287	3.05293	0.00226617	0.0363681	TRUE	UP	ENST00000367569.4
CKAP5	3.33411	1.84034	0.446628	4.12052	3.78011e-05	0.000838475	TRUE	UP	ENSG00000175216.15		DHFR-201	6.12534	1.28422	0.309061	4.15523	3.24964e-05	0.0012283	TRUE	UP	ENST00000439211.7
ANKRD36C	2.84096	1.83555	0.483164	3.79902	0.000145271	0.00257283	TRUE	UP	ENSG00000174501.15		RPAP2-203	5.27774	1.28038	0.329783	3.8825	0.000103387	0.00306191	TRUE	UP	ENST00000610020.2
ERCC3	1.71115	1.83496	0.646898	2.83655	0.00456039	0.0354532	TRUE	UP	ENSG00000163161.14		HPRT1-201	5.05776	1.2729	0.333357	3.81842	0.000134309	0.00384268	TRUE	UP	ENST00000298556.8
PTPN4	1.69827	1.83434	0.63295	2.89808	0.00375455	0.0309791	TRUE	UP	ENSG00000088179.9		OLMALINC-207	6.0519	1.27088	0.321823	3.949	7.8477e-05	0.00242645	TRUE	UP	ENST00000654233.1
MTR	4.09144	1.83263	0.405469	4.51979	6.19007e-06	0.000182874	TRUE	UP	ENSG00000116984.15		RAB11A-201	5.13599	1.26933	0.339278	3.74125	0.000183104	0.00501197	TRUE	UP	ENST00000261890.7
MPC1	3.45957	1.82895	0.436786	4.18728	2.82317e-05	0.000662671	TRUE	UP	ENSG00000060762.19		ADAM32-205	5.97467	1.26741	0.319397	3.96815	7.24341e-05	0.00225673	TRUE	UP	ENST00000518259.1
IGF2R	2.72571	1.82757	0.503387	3.63055	0.000282814	0.00428851	TRUE	UP	ENSG00000197081.16		CD164-202	6.23937	1.26646	0.303607	4.17137	3.02773e-05	0.0011659	TRUE	UP	ENST00000310786.10
FBXO5	1.91475	1.8275	0.595733	3.06764	0.00215756	0.0204819	TRUE	UP	ENSG00000112029.10		CYP46A1-204	4.83779	1.2646	0.345713	3.65796	0.000254233	0.00660171	TRUE	UP	ENST00000554611.5
PCBP1-AS1	1.69801	1.82478	0.648761	2.81272	0.00491247	0.0374528	TRUE	UP	ENSG00000179818.17		PSMB1-201	11.0756	1.25857	0.230063	5.47056	4.48622e-08	3.66017e-06	TRUE	UP	ENST00000262193.7
QKI	3.2991	1.82411	0.452545	4.03077	5.55933e-05	0.00114083	TRUE	UP	ENSG00000112531.17		PET100-202	4.70586	1.25155	0.354153	3.53392	0.000409443	0.0096601	TRUE	UP	ENST00000594797.6
GCC2	2.1075	1.82056	0.569286	3.19798	0.00138396	0.0146876	TRUE	UP	ENSG00000135968.22		CALM3-201	4.13736	1.24451	0.367734	3.38427	0.000713676	0.0149671	TRUE	UP	ENST00000291295.14
TXLNA	3.14557	1.81345	0.474533	3.82154	0.00013262	0.00238576	TRUE	UP	ENSG00000084652.16		POLR2A-209	3.59711	1.23086	0.402866	3.05525	0.00224873	0.0362623	TRUE	UP	ENST00000617998.6
ATP5PF	3.1304	1.81163	0.46339	3.90951	9.24848e-05	0.00178059	TRUE	UP	ENSG00000154723.13		BUB3-203	4.79312	1.21574	0.345145	3.5224	0.000427665	0.00999927	TRUE	UP	ENST00000368865.9
DCP1A	1.88334	1.81144	0.594904	3.04493	0.00232733	0.0216871	TRUE	UP	ENSG00000272886.6		RPL36-201	33.8634	1.21126	0.12876	9.4071	5.10034e-21	2.68745e-18	TRUE	UP	ENST00000347512.8
XIAP	3.67879	1.80326	0.439092	4.10678	4.01211e-05	0.000870222	TRUE	UP	ENSG00000101966.14		UBE2M-201	3.28848	1.21	0.407416	2.96994	0.00297863	0.044896	TRUE	UP	ENST00000253023.8
RBBP4	2.22232	1.80142	0.547549	3.28998	0.00100194	0.011527	TRUE	UP	ENSG00000162521.19		KCNQ1OT1-201	13.5662	1.20941	0.203927	5.93061	3.0181e-09	2.95867e-07	TRUE	UP	ENST00000597346.1
CTPS1	4.03616	1.79884	0.399476	4.50301	6.69991e-06	0.000197087	TRUE	UP	ENSG00000171793.17		RBX1-201	4.04486	1.20506	0.389332	3.09519	0.00196685	0.0328571	TRUE	UP	ENST00000216225.9
NUP43	3.00075	1.79542	0.589678	3.04474	0.00232882	0.0216871	TRUE	UP	ENSG00000120253.14		LSM5-208	3.35992	1.20424	0.405752	2.96793	0.0029981	0.0451002	TRUE	UP	ENST00000450169.7
SCAF8	1.69638	1.79373	0.641655	2.79547	0.00518245	0.03872	TRUE	UP	ENSG00000213079.10		HNRNPD-203	5.19423	1.20367	0.33102	3.63625	0.000276631	0.00703551	TRUE	UP	ENST00000353341.8
BCOR	3.56809	1.7925	0.433946	4.1307	3.61662e-05	0.000807436	TRUE	UP	ENSG00000183337.18		LINC00273-201	19.9096	1.20191	0.168516	7.13232	9.86879e-13	1.78924e-10	TRUE	UP	ENST00000539813.1
NETO2	2.02063	1.79236	0.57505	3.11688	0.00182778	0.0182087	TRUE	UP	ENSG00000171208.10		YWHAE-201	27.737	1.20145	0.1465	8.20099	2.38421e-16	7.73095e-14	TRUE	UP	ENST00000264335.13
IREB2	3.86062	1.79094	0.431992	4.14577	3.38671e-05	0.000767061	TRUE	UP	ENSG00000136381.13		RBM8A-204	6.69568	1.19904	0.294504	4.07141	4.67301e-05	0.00162102	TRUE	UP	ENST00000583313.7
WDR33	2.18139	1.79017	0.572032	3.1295	0.00175103	0.0175976	TRUE	UP	ENSG00000136709.12		STMN1-206	6.26789	1.19609	0.296935	4.02813	5.62219e-05	0.00183243	TRUE	UP	ENST00000455785.7
PEG10	2.46729	1.77429	0.530072	3.34726	0.000816152	0.00980508	TRUE	UP	ENSG00000242265.6		H2AC18-201	4.22597	1.19437	0.363977	3.28143	0.00103281	0.02006	TRUE	UP	ENST00000369159.3
ANKRD36	3.0717	1.77152	0.469623	3.77221	0.000161809	0.00276569	TRUE	UP	ENSG00000135976.21		PSMD10-201	4.44061	1.19159	0.359371	3.31578	0.00091388	0.0182574	TRUE	UP	ENST00000217958.8
TENT2	1.91755	1.76456	0.602734	2.92759	0.00341601	0.0290849	TRUE	UP	ENSG00000164329.14		RPA3-201	3.30599	1.18411	0.402973	2.93844	0.00329872	0.0484503	TRUE	UP	ENST00000223129.8
NT5C3B	2.0152	1.76107	0.570575	3.08649	0.00202537	0.0196473	TRUE	UP	ENSG00000141698.17		TCEAL9-202	4.76176	1.18096	0.34864	3.38732	0.000705782	0.0148508	TRUE	UP	ENST00000372661.6
CCNL1	2.24815	1.75993	0.542789	3.24238	0.00118536	0.013083	TRUE	UP	ENSG00000163660.12		HNRNPUL1-204	3.58079	1.18078	0.395976	2.98196	0.00286411	0.0434809	TRUE	UP	ENST00000392006.8
SFT2D1	6.4108	1.75772	0.320156	5.49019	4.01513e-08	1.85944e-06	TRUE	UP	ENSG00000198818.10		HMGN2-210	4.19593	1.16802	0.366138	3.1901	0.00142223	0.0255217	TRUE	UP	ENST00000619352.4
TUT4	2.12866	1.75615	0.584993	3.00199	0.00268219	0.0242458	TRUE	UP	ENSG00000134744.14		TIGD1-201	18.3847	1.16385	0.175567	6.62911	3.37706e-11	4.44857e-09	TRUE	UP	ENST00000408957.7
ZBTB33	1.72884	1.7513	0.606395	2.88806	0.00387631	0.0315538	TRUE	UP	ENSG00000177485.7		MT-ND3-201	19.5738	1.15322	0.170351	6.76965	1.29094e-11	1.85513e-09	TRUE	UP	ENST00000361227.2
BPTF	3.76476	1.74797	0.413865	4.22352	2.40518e-05	0.000576402	TRUE	UP	ENSG00000171634.19		RPL36-202	6.77681	1.15259	0.283114	4.07112	4.67874e-05	0.00162102	TRUE	UP	ENST00000394580.2
ASB3	1.82567	1.74218	0.606764	2.87127	0.00408827	0.0326585	TRUE	UP	ENSG00000115239.24		GNG10-201	4.62491	1.14808	0.341503	3.36185	0.000774214	0.0159198	TRUE	UP	ENST00000374293.5
ZMYM2	1.87741	1.73496	0.607239	2.85713	0.00427491	0.033756	TRUE	UP	ENSG00000121741.17		KHSRP-212	7.34711	1.14609	0.275892	4.15414	3.26508e-05	0.00122887	TRUE	UP	ENST00000600480.2
PLS3	21.1845	1.73265	0.178144	9.72611	2.33348e-22	7.99685e-20	TRUE	UP	ENSG00000102024.19		RPS19-207	5.15879	1.14086	0.326779	3.49124	0.000480778	0.0109746	TRUE	UP	ENST00000600467.6
DHX40	1.90441	1.72921	0.585675	2.95252	0.00315197	0.0273966	TRUE	UP	ENSG00000108406.10		DNAJC8-201	3.72674	1.13687	0.383299	2.966	0.00301702	0.0451518	TRUE	UP	ENST00000263697.6
SLC20A1	2.32478	1.71915	0.52807	3.25554	0.00113178	0.0126602	TRUE	UP	ENSG00000144136.11		RPL9-203	5.56728	1.13578	0.326482	3.47884	0.000503591	0.0113722	TRUE	UP	ENST00000449470.6
HACD3	11.5197	1.714	0.23791	7.20438	5.83091e-13	5.87722e-11	TRUE	UP	ENSG00000074696.13		HDAC1-201	3.8937	1.13255	0.372882	3.03729	0.00238717	0.0377352	TRUE	UP	ENST00000373548.8
UNC50	1.84994	1.71323	0.58435	2.93186	0.00336943	0.0287956	TRUE	UP	ENSG00000115446.12		RPL9-213	5.12073	1.1165	0.33017	3.38158	0.000720703	0.0150399	TRUE	UP	ENST00000645496.2
NAP1L4	3.54168	1.71019	0.432137	3.95751	7.57341e-05	0.00150896	TRUE	UP	ENSG00000205531.14		ENST00000654577	4.18508	1.11337	0.367393	3.03047	0.00244175	0.0383581	TRUE	UP	ENST00000654577.1
HMGB2	12.9417	1.70521	0.222168	7.67532	1.65012e-14	2.13395e-12	TRUE	UP	ENSG00000164104.12		ENST00000605862	4.02653	1.10545	0.376969	2.93248	0.00336263	0.048955	TRUE	UP	ENST00000605862.6
RABGAP1	2.17459	1.70349	0.548431	3.10612	0.00189561	0.0187212	TRUE	UP	ENSG00000011454.18		C15orf40-201	4.85072	1.08024	0.334106	3.23323	0.00122399	0.0227962	TRUE	UP	ENST00000304177.10
PHACTR4	2.48615	1.69696	0.508475	3.33735	0.000845802	0.0101171	TRUE	UP	ENSG00000204138.13		TMEM50A-201	5.43534	1.07987	0.328077	3.2915	0.000996533	0.0194778	TRUE	UP	ENST00000374358.5
BRD2	6.8523	1.69487	0.319777	5.30015	1.15705e-07	4.89532e-06	TRUE	UP	ENSG00000204256.14		SOD1-201	13.0037	1.07696	0.202106	5.32867	9.89336e-08	7.4917e-06	TRUE	UP	ENST00000270142.11
MKNK2	2.24028	1.68779	0.53241	3.1701	0.00152387	0.0158439	TRUE	UP	ENSG00000099875.16		LAPTM4A-201	9.34357	1.0726	0.245629	4.36675	1.26109e-05	0.000559571	TRUE	UP	ENST00000175091.5
MACF1	4.3393	1.68089	0.388445	4.32724	1.50989e-05	0.000396506	TRUE	UP	ENSG00000127603.32		MRPL18-201	5.73652	1.07222	0.309316	3.46642	0.000527436	0.0118262	TRUE	UP	ENST00000367034.5
SRSF4	4.63085	1.68081	0.373985	4.49433	6.9791e-06	0.000202689	TRUE	UP	ENSG00000116350.18		H4C3-201	50.2797	1.06449	0.150643	7.06631	1.59106e-12	2.75624e-10	TRUE	UP	ENST00000377803.4
SOD2	3.10048	1.67979	0.457898	3.66848	0.000243997	0.00382424	TRUE	UP	ENSG00000291237.1		C11orf58-201	5.58413	1.05228	0.311181	3.38157	0.000720716	0.0150399	TRUE	UP	ENST00000228136.9
INIP	2.60229	1.66889	0.502059	3.3241	0.000887041	0.0105552	TRUE	UP	ENSG00000148153.14		ENST00000554988	6.98359	1.04204	0.290071	3.59235	0.000327712	0.00804707	TRUE	UP	ENST00000554988.1
UNG	2.87615	1.66748	0.490932	3.39656	0.000682376	0.00856565	TRUE	UP	ENSG00000076248.12		TBCA-202	12.3939	1.04138	0.214042	4.8653	1.14282e-06	6.75333e-05	TRUE	UP	ENST00000380377.9
TMEM242	2.07413	1.66563	0.572896	2.90739	0.00364463	0.0303159	TRUE	UP	ENSG00000215712.11		VBP1-201	10.3347	1.03833	0.228588	4.54236	5.56286e-06	0.000279158	TRUE	UP	ENST00000286428.7
MED24	1.64177	1.66361	0.616824	2.69705	0.00699566	0.048661	TRUE	UP	ENSG00000008838.21		RPL9-201	21.0689	1.03388	0.164428	6.28773	3.22132e-10	3.917e-08	TRUE	UP	ENST00000295955.14
ANKRD36B	3.18354	1.66044	0.453497	3.66141	0.000250827	0.00388953	TRUE	UP	ENSG00000196912.13		MIR663AHG-223	12.5637	1.01672	0.206601	4.92119	8.60215e-07	5.22799e-05	TRUE	UP	ENST00000601079.6
FMR1	3.38846	1.64757	0.441032	3.73572	0.000187179	0.00307437	TRUE	UP	ENSG00000102081.16		SSB-201	9.0319	1.00989	0.247666	4.07763	4.54966e-05	0.00159377	TRUE	UP	ENST00000260956.9
DLGAP5	2.49896	1.64642	0.500433	3.28999	0.0010019	0.011527	TRUE	UP	ENSG00000126787.13		POLR2J3-217	6.31108	1.00386	0.292578	3.43109	0.000601152	0.0132442	TRUE	UP	ENST00000511313.5
HDAC2	7.04524	1.64607	0.298843	5.50816	3.62612e-08	1.71585e-06	TRUE	UP	ENSG00000196591.12		MAD2L1-201	5.38881	1.00026	0.311258	3.21361	0.00131076	0.0239837	TRUE	UP	ENST00000296509.11
TCEAL8	2.66731	1.62795	0.491858	3.3098	0.000933618	0.0109323	TRUE	UP	ENSG00000180964.17		ILF2-201	8.02756	0.985752	0.257192	3.83275	0.000126718	0.00366698	TRUE	UP	ENST00000361891.9
MRPL39	5.52145	1.62141	0.347078	4.67159	2.98879e-06	9.6628e-05	TRUE	UP	ENSG00000154719.14		RPS8-202	45.4889	0.979683	0.110151	8.89402	5.89377e-19	2.57009e-16	TRUE	UP	ENST00000396651.8
PUM1	5.30356	1.61996	0.345673	4.68639	2.78065e-06	9.21649e-05	TRUE	UP	ENSG00000134644.16		NMNAT3-219	6.07821	0.9434	0.300909	3.13517	0.00171757	0.0297948	TRUE	UP	ENST00000645507.1
ANKRD26	2.23287	1.61938	0.547999	2.95507	0.00312596	0.0272587	TRUE	UP	ENSG00000107890.17		NOPCHAP1-204	10.665	0.931926	0.233076	3.99837	6.37797e-05	0.00201999	TRUE	UP	ENST00000552951.7
HECTD1	1.96356	1.61502	0.569843	2.83415	0.00459477	0.0355848	TRUE	UP	ENSG00000092148.14		EIF5B-201	6.03156	0.923297	0.297782	3.10058	0.00193144	0.032351	TRUE	UP	ENST00000289371.11
ENOPH1	2.61598	1.61319	0.497533	3.24238	0.00118537	0.013083	TRUE	UP	ENSG00000145293.17		TCP1-201	12.8473	0.917685	0.2046	4.48526	7.28251e-06	0.000348843	TRUE	UP	ENST00000321394.12
BDP1	3.18826	1.61277	0.446677	3.61059	0.000305503	0.00457187	TRUE	UP	ENSG00000145734.20		SUMO2-202	33.8964	0.91714	0.125417	7.31274	2.61744e-13	5.09233e-11	TRUE	UP	ENST00000420826.7
PTGFRN	2.08221	1.60269	0.557929	2.87257	0.00407154	0.0325628	TRUE	UP	ENSG00000134247.10		XACT-203	31.4176	0.892891	0.13578	6.57602	4.8322e-11	6.23551e-09	TRUE	UP	ENST00000674361.1
SLC31A1	2.798	1.59827	0.474287	3.36984	0.000752112	0.00918891	TRUE	UP	ENSG00000136868.11		S100A10-202	9.03375	0.886235	0.241167	3.67478	0.000238057	0.00623286	TRUE	UP	ENST00000368811.8
TFDP2	1.89682	1.59588	0.582885	2.7379	0.0061832	0.0441915	TRUE	UP	ENSG00000114126.18		VIM-201	20.0727	0.877672	0.162988	5.38487	7.2495e-08	5.65909e-06	TRUE	UP	ENST00000224237.9
TNPO2	3.81373	1.59056	0.416193	3.8217	0.000132536	0.00238576	TRUE	UP	ENSG00000105576.16		RPS15-209	48.5207	0.858092	0.106107	8.08706	6.11242e-16	1.75677e-13	TRUE	UP	ENST00000592588.7
MTF2	2.95291	1.58953	0.464939	3.4188	0.000628986	0.00802807	TRUE	UP	ENSG00000143033.18		RPS17-209	90.6186	0.832656	0.0863374	9.64421	5.20111e-22	3.13206e-19	TRUE	UP	ENST00000647841.1
MON2	2.03465	1.58757	0.570145	2.7845	0.00536111	0.0398536	TRUE	UP	ENSG00000061987.16		PNN-201	6.87857	0.816323	0.276017	2.95752	0.00310128	0.0460315	TRUE	UP	ENST00000216832.9
LSM6	2.35509	1.57922	0.514687	3.06832	0.00215267	0.0204638	TRUE	UP	ENSG00000164167.12		RPL18-208	28.2054	0.815701	0.141035	5.78369	7.3081e-09	6.6488e-07	TRUE	UP	ENST00000549920.6
FANCD2	2.05455	1.57186	0.559096	2.81143	0.00493217	0.0374779	TRUE	UP	ENSG00000144554.13		ENST00000562952	9.17392	0.795687	0.246287	3.23074	0.00123472	0.0229284	TRUE	UP	ENST00000562952.1
CDK16	3.66748	1.56653	0.425515	3.68151	0.00023186	0.00365327	TRUE	UP	ENSG00000102225.17		RPL36A-203	15.7895	0.786146	0.18483	4.25334	2.10609e-05	0.000856386	TRUE	UP	ENST00000427805.6
BTBD7	2.00343	1.56547	0.583118	2.68465	0.00726058	0.0496647	TRUE	UP	ENSG00000011114.15		RPS15-210	8.50921	0.784889	0.248556	3.15779	0.00158968	0.027921	TRUE	UP	ENST00000592623.5
SPC25	2.94405	1.55549	0.464738	3.34702	0.000816852	0.00980508	TRUE	UP	ENSG00000152253.9		ATP5PF-201	7.34426	0.775166	0.261286	2.96674	0.00300978	0.0451389	TRUE	UP	ENST00000284971.8
PRRC2A	2.65639	1.55484	0.488512	3.1828	0.00145859	0.0153803	TRUE	UP	ENSG00000204469.13		HMGN1-204	8.92054	0.7733	0.239547	3.22818	0.00124583	0.0230669	TRUE	UP	ENST00000380749.10
CEP78	3.6557	1.55012	0.409921	3.78151	0.000155879	0.00270022	TRUE	UP	ENSG00000148019.14		OAZ1-211	12.6369	0.772942	0.210918	3.66466	0.000247665	0.00645768	TRUE	UP	ENST00000602676.6
VPS13A	2.13003	1.54059	0.530009	2.90674	0.00365222	0.0303422	TRUE	UP	ENSG00000197969.14		NUCKS1-201	19.4785	0.759831	0.16368	4.64216	3.44782e-06	0.000180917	TRUE	UP	ENST00000367142.5
WDR41	1.94572	1.53604	0.563856	2.72417	0.00644628	0.0455963	TRUE	UP	ENSG00000164253.14		HELLPAR-201	24.0157	0.758695	0.148311	5.11557	3.12801e-07	2.11534e-05	TRUE	UP	ENST00000626826.1
GAPVD1	3.45955	1.53097	0.417683	3.66539	0.00024696	0.00384697	TRUE	UP	ENSG00000165219.23		ATP5PO-201	10.4584	0.757357	0.223391	3.39027	0.000698237	0.0147165	TRUE	UP	ENST00000290299.7
MECP2	2.29864	1.52794	0.514475	2.96991	0.00297889	0.0262433	TRUE	UP	ENSG00000169057.25		RPS19-206	45.6094	0.754213	0.109037	6.91701	4.61261e-12	7.28e-10	TRUE	UP	ENST00000598742.6
PSIP1	2.2957	1.50577	0.51045	2.94988	0.00317897	0.0275806	TRUE	UP	ENSG00000164985.15		H3-3A-203	22.9624	0.735446	0.151266	4.86195	1.16236e-06	6.8052e-05	TRUE	UP	ENST00000366815.10
ENSG00000280441	2.04481	1.49842	0.551168	2.71862	0.00655549	0.0462256	TRUE	UP	ENSG00000280441.3		H2AC12-201	18.4317	0.690904	0.1717	4.02391	5.72397e-05	0.00185603	TRUE	UP	ENST00000377459.3
GOLGA8B	2.19779	1.49131	0.53695	2.77737	0.00548012	0.040475	TRUE	UP	ENSG00000215252.12		MT-RNR2-201	5674.8	0.686778	0.0965493	7.11324	1.13354e-12	2.01897e-10	TRUE	UP	ENST00000387347.2
PCM1	2.7352	1.4856	0.475373	3.12512	0.00177731	0.0177835	TRUE	UP	ENSG00000078674.20		MORF4L1-203	10.2344	0.682992	0.224842	3.03765	0.00238431	0.0377352	TRUE	UP	ENST00000426013.7
KATNBL1	2.1934	1.48407	0.536638	2.76549	0.00568367	0.0415811	TRUE	UP	ENSG00000134152.11		RN7SK-201	31.4117	0.678834	0.133125	5.09924	3.41025e-07	2.29394e-05	TRUE	UP	ENST00000636484.1
PGRMC1	13.5444	1.4837	0.215031	6.89995	5.20192e-12	4.69131e-10	TRUE	UP	ENSG00000101856.10		RPL36A-210	15.6547	0.6774	0.185651	3.64877	0.000263497	0.00680037	TRUE	UP	ENST00000614077.4
RC3H2	2.16789	1.47786	0.527525	2.80149	0.00508668	0.0383177	TRUE	UP	ENSG00000056586.16		EEF2-201	23.0497	0.632432	0.148235	4.26641	1.98642e-05	0.000815593	TRUE	UP	ENST00000309311.7
HELLS	4.85308	1.47773	0.364084	4.05876	4.93348e-05	0.00103407	TRUE	UP	ENSG00000119969.16		7SK.1-201	35.4938	0.631756	0.204453	3.08998	0.00200171	0.0332729	TRUE	UP	ENST00000365328.1
KDM5A	2.11944	1.47559	0.537296	2.74633	0.00602658	0.0433778	TRUE	UP	ENSG00000073614.13		ANKRD30BL-204	25.055	0.620496	0.144112	4.30566	1.66485e-05	0.000704138	TRUE	UP	ENST00000470729.5
YIPF4	2.71026	1.4707	0.477165	3.08217	0.00205498	0.019782	TRUE	UP	ENSG00000119820.11		RPS15-212	13.4171	0.615677	0.193547	3.18101	0.00146762	0.026285	TRUE	UP	ENST00000593052.5
IGF2BP1	3.19988	1.46837	0.427201	3.43718	0.00058781	0.00765419	TRUE	UP	ENSG00000159217.10		ARF1-201	16.352	0.560039	0.179992	3.11147	0.00186157	0.0315992	TRUE	UP	ENST00000272102.10
OLA1	4.38906	1.46476	0.38625	3.79226	0.000149285	0.00263712	TRUE	UP	ENSG00000138430.16		MT-RNR1-201	1903.91	0.55985	0.109295	5.1224	3.01673e-07	2.05105e-05	TRUE	UP	ENST00000389680.2
CIRBP	3.69557	1.45807	0.402725	3.62051	0.000294017	0.004429	TRUE	UP	ENSG00000099622.14		RPL13-201	26.9652	0.559782	0.138885	4.03055	5.56463e-05	0.00182307	TRUE	UP	ENST00000311528.10
MFSD14B	3.49177	1.45261	0.415125	3.49922	0.000466619	0.00634565	TRUE	UP	ENSG00000148110.17		COX6A1-201	15.8284	0.553214	0.182257	3.03536	0.00240248	0.0379298	TRUE	UP	ENST00000229379.3
CREBBP	2.36741	1.45098	0.502143	2.88958	0.0038576	0.0314762	TRUE	UP	ENSG00000005339.15		UBB-201	22.8525	0.549415	0.148971	3.68807	0.000225966	0.0059907	TRUE	UP	ENST00000302182.8
SH3GLB1	2.8378	1.44661	0.466055	3.10394	0.00190959	0.0188322	TRUE	UP	ENSG00000097033.15		SET-201	16.5416	0.547346	0.178988	3.05801	0.00222814	0.0361709	TRUE	UP	ENST00000322030.13
RN7SL1	31.3519	1.43941	0.289113	4.97872	6.40049e-07	2.46455e-05	TRUE	UP	ENSG00000276168.1		RPS4X-201	47.147	0.542257	0.104942	5.16723	2.37589e-07	1.67852e-05	TRUE	UP	ENST00000316084.10
CHMP2B	2.26273	1.4393	0.519706	2.76946	0.00561491	0.041204	TRUE	UP	ENSG00000083937.10		MT-ND6-201	46.7966	0.485471	0.111728	4.34511	1.39205e-05	0.000602871	TRUE	UP	ENST00000361681.2
ZKSCAN1	2.7247	1.43818	0.461879	3.11376	0.00184721	0.0183489	TRUE	UP	ENSG00000106261.17		RPL23A-204	68.0407	0.456486	0.0915486	4.98626	6.15578e-07	3.95157e-05	TRUE	UP	ENST00000422514.7
UBE3C	2.80362	1.43225	0.468597	3.05646	0.0022397	0.0211154	TRUE	UP	ENSG00000009335.18		RPL31-201	52.334	0.447631	0.10086	4.43816	9.0732e-06	0.000421837	TRUE	UP	ENST00000264258.8
H2AC19	3.43519	1.42402	0.415737	3.42528	0.000614162	0.007883	TRUE	UP	ENSG00000288859.1		RPLP2-201	31.292	0.446689	0.127143	3.51328	0.000442616	0.0103272	TRUE	UP	ENST00000321153.9
NCBP1	2.63753	1.41564	0.488602	2.89734	0.00376346	0.0310033	TRUE	UP	ENSG00000136937.13		SRSF3-202	23.3146	0.434466	0.147295	2.94962	0.00318164	0.0470585	TRUE	UP	ENST00000373715.11
NUP133	3.69687	1.41494	0.401303	3.52586	0.00042211	0.00592857	TRUE	UP	ENSG00000069248.12		MIF-201	26.2834	0.423941	0.138755	3.05531	0.00224828	0.0362623	TRUE	UP	ENST00000215754.8
ANKRD17	3.39071	1.41322	0.421313	3.35432	0.000795608	0.0096515	TRUE	UP	ENSG00000132466.20		RPL35-201	43.0387	0.410471	0.113511	3.61612	0.000299054	0.00747399	TRUE	UP	ENST00000348462.6
DEGS1	4.1381	1.40122	0.380106	3.68638	0.000227469	0.00360063	TRUE	UP	ENSG00000143753.13		SLC25A5-201	31.8469	0.379658	0.12938	2.93444	0.00334151	0.0488518	TRUE	UP	ENST00000317881.9
HMGB3	4.70625	1.39561	0.34962	3.99181	6.55717e-05	0.00131412	TRUE	UP	ENSG00000029993.15		PTMA-202	38.4982	0.378823	0.114379	3.31201	0.000926281	0.0184343	TRUE	UP	ENST00000409115.8
C4orf3	4.40101	1.3928	0.36208	3.84665	0.000119743	0.00219443	TRUE	UP	ENSG00000164096.13		RPS3A-201	33.3315	0.365724	0.124967	2.92657	0.00342719	0.0495318	TRUE	UP	ENST00000274065.9
ELAVL1	2.45383	1.39101	0.490638	2.83511	0.00458098	0.0355182	TRUE	UP	ENSG00000066044.15		ENST00000445125	5033.44	0.364204	0.0824945	4.41489	1.01061e-05	0.000461377	TRUE	UP	ENST00000445125.2
UGGT1	2.48588	1.38255	0.495314	2.79126	0.00525025	0.0391144	TRUE	UP	ENSG00000136731.13		ENST00000629969	99.8334	0.349662	0.0897468	3.89609	9.77574e-05	0.00292948	TRUE	UP	ENST00000629969.1
GDI1	2.75699	1.37459	0.472003	2.91224	0.00358847	0.0301414	TRUE	UP	ENSG00000203879.12		ENST00000627981	1440.13	0.337208	0.0800712	4.21136	2.53843e-05	0.00100315	TRUE	UP	ENST00000627981.1
POGZ	2.74362	1.36722	0.469157	2.91421	0.00356588	0.0300252	TRUE	UP	ENSG00000143442.23		MT-CYB-201	150.031	0.335251	0.0711699	4.71058	2.47016e-06	0.000135034	TRUE	UP	ENST00000361789.2
AAMP	2.58914	1.36445	0.476677	2.86243	0.00420408	0.0332351	TRUE	UP	ENSG00000127837.10		ENST00000631211	1451.79	0.329154	0.0816837	4.02962	5.58669e-05	0.00182556	TRUE	UP	ENST00000631211.1
PUM2	2.35917	1.35919	0.503726	2.69828	0.00696998	0.048549	TRUE	UP	ENSG00000055917.17		ENST00000625598	1462.17	0.307555	0.0867988	3.54331	0.000395144	0.00939284	TRUE	UP	ENST00000625598.1
PDCD2	3.41869	1.35359	0.421355	3.21246	0.00131602	0.0142047	TRUE	UP	ENSG00000071994.11		RPL37A-210	65.7016	0.306764	0.0954306	3.21452	0.00130661	0.0239469	TRUE	UP	ENST00000491306.6
PMAIP1	3.0333	1.35308	0.432967	3.12513	0.00177729	0.0177835	TRUE	UP	ENSG00000141682.12		RPS2-201	71.4861	0.295271	0.0902599	3.27134	0.00107039	0.0205093	TRUE	UP	ENST00000343262.9
BEX3	12.4901	1.33413	0.21962	6.07472	1.24206e-09	8.03121e-08	TRUE	UP	ENSG00000166681.14		MT-CO2-201	255.769	-0.204213	0.0606272	-3.36833	0.000756239	0.015601	TRUE	DOWN	ENST00000361739.1
PHF6	3.51714	1.33316	0.411329	3.24112	0.00119062	0.0131198	TRUE	UP	ENSG00000156531.18		MT-ND2-201	201.112	-0.23509	0.0772832	-3.04193	0.00235069	0.0373923	TRUE	DOWN	ENST00000361453.3
SRSF11	9.55059	1.31549	0.24901	5.28289	1.27164e-07	5.31452e-06	TRUE	UP	ENSG00000116754.14		RPL41-202	107.258	-0.329678	0.0808795	-4.07617	4.5784e-05	0.00159941	TRUE	DOWN	ENST00000501597.3
RPL39	3.37597	1.31511	0.413841	3.17783	0.00148384	0.0155324	TRUE	UP	ENSG00000198918.8		RPL12-201	37.6511	-0.346949	0.118044	-2.93916	0.00329106	0.0484426	TRUE	DOWN	ENST00000361436.10
SEPTIN2	3.181	1.30529	0.43793	2.9806	0.00287687	0.0256264	TRUE	UP	ENSG00000168385.18		MALAT1-202	44.3658	-0.43973	0.115468	-3.80823	0.000139965	0.00397753	TRUE	DOWN	ENST00000534336.2
ALG13	2.54329	1.30465	0.474447	2.74983	0.00596263	0.0430188	TRUE	UP	ENSG00000101901.13		MALAT1-215	46.8853	-0.468283	0.110917	-4.22194	2.42211e-05	0.000960186	TRUE	DOWN	ENST00000619449.2
MKI67	4.4052	1.30432	0.366349	3.56032	0.0003704	0.00532227	TRUE	UP	ENSG00000148773.14		RPL13A-201	63.8019	-0.474172	0.0941699	-5.03528	4.77146e-07	3.09436e-05	TRUE	DOWN	ENST00000391857.9
CHD2	3.44808	1.3042	0.422508	3.0868	0.00202325	0.0196473	TRUE	UP	ENSG00000173575.24		RPS12-201	28.3582	-0.476143	0.133678	-3.56186	0.000368234	0.00881947	TRUE	DOWN	ENST00000230050.4
MCM6	4.64734	1.29769	0.349322	3.71488	0.000203299	0.00328634	TRUE	UP	ENSG00000076003.5		CYCS-201	30.0754	-0.481344	0.131042	-3.67321	0.000239521	0.00625824	TRUE	DOWN	ENST00000305786.7
GART	4.79896	1.2961	0.347583	3.7289	0.00019232	0.00313847	TRUE	UP	ENSG00000159131.17		RAN-212	25.2876	-0.518246	0.142797	-3.62925	0.00028424	0.00717466	TRUE	DOWN	ENST00000543796.6
GLO1	10.2648	1.29571	0.242108	5.3518	8.70845e-08	3.80177e-06	TRUE	UP	ENSG00000124767.7		RPL19-201	20.4638	-0.5295	0.160515	-3.29876	0.000971114	0.0190851	TRUE	DOWN	ENST00000225430.9
AKAP9	2.85466	1.28514	0.458571	2.80249	0.00507097	0.0383177	TRUE	UP	ENSG00000127914.19		RPLP0-203	33.3595	-0.546634	0.128311	-4.26023	2.04217e-05	0.00083577	TRUE	DOWN	ENST00000392514.9
HMGN2	26.8798	1.28451	0.164061	7.82942	4.90111e-15	6.85555e-13	TRUE	UP	ENSG00000198830.11		RPL14-201	18.9023	-0.551744	0.163743	-3.36957	0.000752858	0.0155566	TRUE	DOWN	ENST00000338970.10
BRCA1	3.30189	1.28387	0.418011	3.07138	0.00213074	0.0203116	TRUE	UP	ENSG00000012048.24		RPL27A-201	46.3897	-0.565901	0.108887	-5.19713	2.02391e-07	1.47094e-05	TRUE	DOWN	ENST00000314138.11
NUP54	4.15863	1.28083	0.374329	3.42167	0.000622373	0.00795848	TRUE	UP	ENSG00000138750.16		RPL27A-206	14.5837	-0.579899	0.189381	-3.06209	0.00219801	0.0358658	TRUE	DOWN	ENST00000530022.5
THOC2	7.7387	1.27821	0.273139	4.67972	2.8727e-06	9.42081e-05	TRUE	UP	ENSG00000125676.20		RPS24-214	33.2932	-0.589137	0.127391	-4.62464	3.75244e-06	0.000194481	TRUE	DOWN	ENST00000613865.5
PM20D2	3.07659	1.27715	0.450269	2.83642	0.00456226	0.0354532	TRUE	UP	ENSG00000146281.6		RPL7-201	62.0096	-0.59026	0.100164	-5.89291	3.79448e-09	3.66298e-07	TRUE	DOWN	ENST00000352983.7
PSMB1	10.6884	1.27607	0.233842	5.45697	4.84315e-08	2.19834e-06	TRUE	UP	ENSG00000008018.9		MT-CO1-201	647.748	-0.592837	0.0801511	-7.39649	1.39834e-13	2.85216e-11	TRUE	DOWN	ENST00000361624.2
SF3B5	5.28667	1.26999	0.42706	2.97379	0.00294145	0.0260138	TRUE	UP	ENSG00000169976.7		ACTG1-223	22.4708	-0.62781	0.212052	-2.96064	0.00307004	0.0456213	TRUE	DOWN	ENST00000681052.1
KANSL1	3.16847	1.26242	0.431371	2.92652	0.00342775	0.0291367	TRUE	UP	ENSG00000120071.15		ACTG1-205	21.4526	-0.636823	0.155949	-4.08355	4.43536e-05	0.00156233	TRUE	DOWN	ENST00000573283.7
RAD51C	2.81944	1.26217	0.451292	2.7968	0.00516122	0.0387074	TRUE	UP	ENSG00000108384.16		RPL30-201	37.1281	-0.643065	0.119226	-5.39367	6.90317e-08	5.4222e-06	TRUE	DOWN	ENST00000287038.8
APP	6.2862	1.25613	0.315862	3.97684	6.98364e-05	0.00139551	TRUE	UP	ENSG00000142192.22		MYL6-207	12.2997	-0.643704	0.209385	-3.07427	0.0021102	0.0347017	TRUE	DOWN	ENST00000547649.5
TLE3	2.70715	1.25564	0.462348	2.71579	0.00661183	0.0464794	TRUE	UP	ENSG00000140332.18		PPIA-204	99.6088	-0.644041	0.0815153	-7.90087	2.76973e-15	6.86784e-13	TRUE	DOWN	ENST00000468812.6
RSRP1	2.77315	1.25408	0.460914	2.72085	0.00651143	0.0459622	TRUE	UP	ENSG00000117616.18		RPS25-202	32.5286	-0.647606	0.128521	-5.03893	4.68148e-07	3.05165e-05	TRUE	DOWN	ENST00000527673.2
AP3D1	3.83985	1.25215	0.387356	3.23256	0.00122687	0.0134211	TRUE	UP	ENSG00000065000.20		RPS26-204	15.1227	-0.652027	0.187136	-3.48424	0.000493542	0.0112045	TRUE	DOWN	ENST00000646449.2
NUP107	2.6475	1.25201	0.465557	2.68928	0.00716071	0.0492272	TRUE	UP	ENSG00000111581.10		MT-ND4L-201	19.7453	-0.668035	0.215931	-3.09374	0.00197652	0.0329321	TRUE	DOWN	ENST00000361335.1
MARCKS	7.21966	1.23911	0.299164	4.1419	3.44448e-05	0.000771518	TRUE	UP	ENSG00000277443.3		RPS23-209	18.4072	-0.687506	0.169151	-4.06445	4.81459e-05	0.001659	TRUE	DOWN	ENST00000651545.1
BRD4	3.03986	1.23697	0.441176	2.8038	0.00505045	0.0382495	TRUE	UP	ENSG00000141867.19		TUBA1B-202	46.3808	-0.688173	0.11036	-6.23573	4.49671e-10	5.26531e-08	TRUE	DOWN	ENST00000336023.9
RAB11A	5.64253	1.23405	0.325501	3.79123	0.000149904	0.00264096	TRUE	UP	ENSG00000103769.10		RPS24-206	11.6788	-0.703944	0.215074	-3.27302	0.00106404	0.0204496	TRUE	DOWN	ENST00000465692.2
GOLGA8A	4.01343	1.22343	0.381847	3.20399	0.00135537	0.0144704	TRUE	UP	ENSG00000175265.19		CALM2-201	10.6997	-0.710241	0.222406	-3.19344	0.00140589	0.0253984	TRUE	DOWN	ENST00000272298.12
PNISR	3.71843	1.22208	0.389465	3.13784	0.00170198	0.0172565	TRUE	UP	ENSG00000132424.17		ATP5F1B-201	13.8948	-0.711488	0.198946	-3.57629	0.000348503	0.00844286	TRUE	DOWN	ENST00000262030.8
DHFR	5.21635	1.20621	0.334858	3.60215	0.000315592	0.00468196	TRUE	UP	ENSG00000228716.7		TRMT112-206	8.82799	-0.722513	0.24112	-2.99649	0.00273109	0.0419143	TRUE	DOWN	ENST00000544844.6
SNRPA1	4.08329	1.19701	0.376715	3.1775	0.00148551	0.0155324	TRUE	UP	ENSG00000131876.18		PA2G4-201	17.9844	-0.726757	0.176234	-4.12383	3.72623e-05	0.00136191	TRUE	DOWN	ENST00000303305.11
STMN1	6.66139	1.19448	0.28828	4.14347	3.42094e-05	0.000768758	TRUE	UP	ENSG00000117632.23		RPS20-215	9.6631	-0.732516	0.232475	-3.15095	0.00162742	0.0284652	TRUE	DOWN	ENST00000678039.1
MT-ND3	16.0082	1.1905	0.192772	6.17569	6.58766e-10	4.38367e-08	TRUE	UP	ENSG00000198840.2		B2M-211	22.6424	-0.74821	0.154466	-4.84386	1.27338e-06	7.38678e-05	TRUE	DOWN	ENST00000648006.3
RANBP2	3.37737	1.17611	0.41366	2.84318	0.00446662	0.0350678	TRUE	UP	ENSG00000153201.17		HSP90AB1-203	26.5461	-0.749663	0.145549	-5.1506	2.59655e-07	1.79431e-05	TRUE	DOWN	ENST00000371646.10
HLA-C	4.36333	1.17025	0.358644	3.263	0.0011024	0.012407	TRUE	UP	ENSG00000204525.18		RPL8-201	10.3335	-0.756299	0.229283	-3.29853	0.000971914	0.0190851	TRUE	DOWN	ENST00000262584.7
SMC1A	5.83335	1.1698	0.313121	3.73593	0.000187021	0.00307437	TRUE	UP	ENSG00000072501.19		SCD-201	8.83342	-0.758148	0.250562	-3.02579	0.00247986	0.0388603	TRUE	DOWN	ENST00000370355.3
KHSRP	5.77674	1.16736	0.310305	3.76196	0.000168586	0.00284603	TRUE	UP	ENSG00000088247.19		RPS21-201	58.9663	-0.76583	0.101923	-7.5138	5.74367e-14	1.25232e-11	TRUE	DOWN	ENST00000343986.9
YWHAE	31.7473	1.1613	0.141201	8.22447	1.96051e-16	3.35933e-14	TRUE	UP	ENSG00000108953.17		ANXA2-204	9.10656	-0.783795	0.241557	-3.24477	0.00117545	0.0220874	TRUE	DOWN	ENST00000451270.7
TMEM230	3.43688	1.16048	0.404989	2.86547	0.0041639	0.0330359	TRUE	UP	ENSG00000089063.15		RPS27A-201	48.3058	-0.784769	0.107718	-7.28537	3.20795e-13	6.14662e-11	TRUE	DOWN	ENST00000272317.11
TMEM50A	4.75745	1.15936	0.352568	3.28832	0.00100788	0.0115712	TRUE	UP	ENSG00000183726.11		RPS7-210	34.0404	-0.788153	0.128758	-6.12122	9.28617e-10	9.86831e-08	TRUE	DOWN	ENST00000645674.2
HDAC1	5.74136	1.1582	0.31507	3.67601	0.000236913	0.00372432	TRUE	UP	ENSG00000116478.12		RPLP0-219	13.5281	-0.80371	0.198494	-4.04905	5.14267e-05	0.00171594	TRUE	DOWN	ENST00000551150.5
DNAJC8	3.75296	1.15591	0.389067	2.97098	0.0029685	0.026193	TRUE	UP	ENSG00000126698.11		TUBA1B-201	11.0866	-0.817024	0.227544	-3.59062	0.000329886	0.00808477	TRUE	DOWN	ENST00000332858.10
SMC3	4.06401	1.15012	0.38321	3.00127	0.00268856	0.0242458	TRUE	UP	ENSG00000108055.11		MT-ND4-201	337.781	-0.819954	0.0606457	-13.5204	1.1851e-41	2.14097e-38	TRUE	DOWN	ENST00000361381.2
RUVBL2	4.08556	1.14737	0.371909	3.08508	0.002035	0.0196686	TRUE	UP	ENSG00000183207.14		RARS1-201	8.03802	-0.824604	0.260772	-3.16217	0.001566	0.0276587	TRUE	DOWN	ENST00000231572.8
POLR2A	5.86242	1.145	0.313187	3.65596	0.000256221	0.00396419	TRUE	UP	ENSG00000181222.19		TIMM17A-201	7.83342	-0.829013	0.267282	-3.10164	0.00192451	0.0322777	TRUE	DOWN	ENST00000367287.5
DHX9	4.26559	1.14456	0.361088	3.16976	0.00152567	0.0158439	TRUE	UP	ENSG00000135829.17		ENST00000690968	14.6561	-0.833119	0.192095	-4.33702	1.44429e-05	0.000623359	TRUE	DOWN	ENST00000690968.2
TCEAL9	5.0916	1.13315	0.334737	3.38518	0.000711325	0.00881631	TRUE	UP	ENSG00000185222.10		SUB1-201	18.247	-0.853069	0.172797	-4.93681	7.94094e-07	4.9226e-05	TRUE	DOWN	ENST00000265073.9
RFC1	3.65952	1.12782	0.403332	2.79626	0.00516971	0.0387087	TRUE	UP	ENSG00000035928.17		RPS20-214	9.08184	-0.853694	0.244439	-3.49246	0.000478595	0.0109445	TRUE	DOWN	ENST00000676918.1
CDC5L	3.78734	1.12762	0.386129	2.92033	0.00349665	0.0295513	TRUE	UP	ENSG00000096401.8		HINT1-201	17.1446	-0.859361	0.175524	-4.89597	9.78218e-07	5.89074e-05	TRUE	DOWN	ENST00000304043.10
LMNB2	3.28739	1.11853	0.412328	2.71271	0.00667346	0.0468166	TRUE	UP	ENSG00000176619.13		MT-CO3-201	473.454	-0.868329	0.0605994	-14.329	1.44156e-46	4.5575e-43	TRUE	DOWN	ENST00000362079.2
NASP	8.89719	1.11821	0.249713	4.47799	7.53477e-06	0.000214902	TRUE	UP	ENSG00000132780.17		GAPDH-201	52.8735	-0.881675	0.105709	-8.34061	7.39079e-17	2.6704e-14	TRUE	DOWN	ENST00000229239.10
RBX1	4.26	1.1126	0.380604	2.92324	0.00346408	0.0293483	TRUE	UP	ENSG00000100387.9		NME1-203	9.93256	-0.890511	0.233178	-3.81901	0.000133987	0.00384217	TRUE	DOWN	ENST00000393196.8
CENPE	3.72339	1.11003	0.391069	2.83845	0.00453326	0.0353884	TRUE	UP	ENSG00000138778.14		YWHAZ-207	6.60595	-0.891028	0.285899	-3.11659	0.00182959	0.0311819	TRUE	DOWN	ENST00000395958.6
HPRT1	5.08769	1.10905	0.327044	3.39115	0.000696009	0.00867354	TRUE	UP	ENSG00000165704.15		EIF3M-208	11.5605	-0.901111	0.216061	-4.17063	3.03757e-05	0.0011659	TRUE	DOWN	ENST00000531120.6
GLUL	4.48222	1.10602	0.350021	3.15987	0.00157838	0.0162192	TRUE	UP	ENSG00000135821.19		UQCRQ-203	8.58901	-0.909041	0.251736	-3.61109	0.000304913	0.00757551	TRUE	DOWN	ENST00000378670.8
C11orf58	5.42808	1.10417	0.313416	3.52302	0.000426652	0.0059679	TRUE	UP	ENSG00000110696.10		MT-ND1-201	189.714	-0.919388	0.0746617	-12.314	7.61098e-35	9.62484e-32	TRUE	DOWN	ENST00000361390.2
TAF15	5.37634	1.08184	0.330025	3.27806	0.00104523	0.0118806	TRUE	UP	ENSG00000270647.7		LDHA-203	11.3499	-0.92226	0.222576	-4.14358	3.41921e-05	0.0012755	TRUE	DOWN	ENST00000379412.9
NFIA	4.85089	1.07723	0.336044	3.20563	0.00134767	0.014433	TRUE	UP	ENSG00000162599.18		RPL37-202	9.07165	-0.935226	0.242656	-3.85412	0.000116145	0.00339992	TRUE	DOWN	ENST00000504562.1
SON	6.57577	1.05713	0.289719	3.64883	0.000263436	0.00403936	TRUE	UP	ENSG00000159140.23		EPRS1-201	7.51156	-0.936357	0.275386	-3.40016	0.000673464	0.0143619	TRUE	DOWN	ENST00000366923.8
NEAT1	12.2238	1.04902	0.211546	4.95884	7.09136e-07	2.68531e-05	TRUE	UP	ENSG00000245532.11		DAZAP2-201	6.10929	-0.971217	0.300813	-3.22864	0.00124381	0.0230634	TRUE	DOWN	ENST00000412716.8
RFC4	3.75142	1.04371	0.383195	2.72369	0.00645566	0.0456156	TRUE	UP	ENSG00000163918.12		CALM2-209	10.1568	-0.984815	0.238366	-4.13152	3.60369e-05	0.00132864	TRUE	DOWN	ENST00000652974.1
CCDC138	4.04087	1.04258	0.363895	2.86506	0.00416926	0.0330359	TRUE	UP	ENSG00000163006.12		HIGD2A-201	4.75864	-0.988088	0.336312	-2.93801	0.00330321	0.0484599	TRUE	DOWN	ENST00000274787.3
SF3B3	4.19019	1.0397	0.359372	2.8931	0.00381454	0.0311915	TRUE	UP	ENSG00000189091.13		COX8A-201	19.1916	-0.991294	0.171056	-5.79514	6.82639e-09	6.25554e-07	TRUE	DOWN	ENST00000314133.4
PARP1	11.5794	1.0333	0.220946	4.67673	2.9149e-06	9.51368e-05	TRUE	UP	ENSG00000143799.14		EIF2S3-201	19.1865	-0.99253	0.169103	-5.86938	4.37425e-09	4.12812e-07	TRUE	DOWN	ENST00000253039.9
MDN1	3.93579	1.02629	0.371867	2.75982	0.0057833	0.0421241	TRUE	UP	ENSG00000112159.13		ATP5MC2-202	6.34579	-0.997077	0.292674	-3.40678	0.000657331	0.0141612	TRUE	DOWN	ENST00000394349.9
MAGOH	3.97416	1.01822	0.372473	2.73368	0.00626312	0.0446231	TRUE	UP	ENSG00000162385.11		SLC25A3-216	13.896	-1.00243	0.201162	-4.98319	6.25433e-07	3.99456e-05	TRUE	DOWN	ENST00000552981.6
SOD1	13.5952	1.01129	0.198004	5.10743	3.26574e-07	1.31667e-05	TRUE	UP	ENSG00000142168.15		PSMA5-201	7.02576	-1.00343	0.278011	-3.60933	0.000306988	0.0076121	TRUE	DOWN	ENST00000271308.9
H2AC18	4.34689	1.01124	0.355729	2.84272	0.00447305	0.0350781	TRUE	UP	ENSG00000288825.1		GAPDH-211	7.12613	-1.02448	0.281595	-3.63813	0.00027462	0.00700169	TRUE	DOWN	ENST00000619601.1
RIF1	5.13324	1.00933	0.328505	3.07248	0.0021229	0.0202933	TRUE	UP	ENSG00000080345.18		RPN2-201	4.95159	-1.02523	0.335658	-3.05438	0.00225524	0.0362623	TRUE	DOWN	ENST00000237530.11
H4C3	49.1277	1.00507	0.127478	7.88428	3.16347e-15	4.71357e-13	TRUE	UP	ENSG00000197061.5		CD63-201	6.0836	-1.02648	0.302127	-3.39752	0.000679998	0.0144769	TRUE	DOWN	ENST00000257857.9
CNIH4	6.45409	1.00174	0.289117	3.46481	0.000530615	0.00702091	TRUE	UP	ENSG00000143771.12		ATP5PB-202	17.9356	-1.02752	0.17907	-5.73809	9.57479e-09	8.64877e-07	TRUE	DOWN	ENST00000369722.8
RPL36	45.2718	1.00116	0.113845	8.79401	1.44314e-18	3.19074e-16	TRUE	UP	ENSG00000130255.13		HSP90AB1-204	5.59092	-1.04194	0.317962	-3.27692	0.00104945	0.0202616	TRUE	DOWN	ENST00000620073.4
RPA3	4.04173	0.999957	0.361684	2.76472	0.00569712	0.0415811	TRUE	UP	ENSG00000106399.11		LDHA-205	25.649	-1.04614	0.148399	-7.04946	1.79611e-12	3.0694e-10	TRUE	DOWN	ENST00000422447.8
KHDC4	4.62135	0.998518	0.34331	2.9085	0.00363162	0.0302509	TRUE	UP	ENSG00000132680.11		RPS27A-203	28.4093	-1.05059	0.141975	-7.39986	1.36325e-13	2.82618e-11	TRUE	DOWN	ENST00000404735.1
RNPS1	4.60718	0.995932	0.33927	2.93551	0.00332998	0.0285653	TRUE	UP	ENSG00000205937.12		RPS20-216	10.0282	-1.05793	0.243112	-4.35163	1.35127e-05	0.000589246	TRUE	DOWN	ENST00000678683.1
BUB3	9.08933	0.989738	0.240928	4.10802	3.99068e-05	0.000868322	TRUE	UP	ENSG00000154473.18		CISD1-201	4.29364	-1.06445	0.361807	-2.94205	0.00326051	0.0480565	TRUE	DOWN	ENST00000333926.6
TBCA	13.0318	0.978164	0.207683	4.7099	2.47842e-06	8.42017e-05	TRUE	UP	ENSG00000171530.15		TPM4-218	4.86375	-1.07565	0.341699	-3.14795	0.00164422	0.0286403	TRUE	DOWN	ENST00000643579.2
MT-ND6	11.7982	0.975562	0.294778	3.30948	0.000934682	0.0109323	TRUE	UP	ENSG00000198695.2		RTN4-201	8.32783	-1.07913	0.262808	-4.10613	4.02338e-05	0.00144007	TRUE	DOWN	ENST00000317610.11
LAPTM4A	9.05553	0.970989	0.248142	3.91303	9.1144e-05	0.00176969	TRUE	UP	ENSG00000068697.7		CCT6A-201	14.9108	-1.11566	0.196801	-5.66897	1.43656e-08	1.2704e-06	TRUE	DOWN	ENST00000275603.9
MRPL18	7.81449	0.968862	0.267554	3.62118	0.000293261	0.00442733	TRUE	UP	ENSG00000112110.10		BRIX1-201	6.9574	-1.1233	0.284755	-3.94481	7.98645e-05	0.00245734	TRUE	DOWN	ENST00000336767.6
PSMD10	4.4052	0.957484	0.356752	2.68389	0.0072771	0.049728	TRUE	UP	ENSG00000101843.19		SSR1-201	5.74825	-1.12808	0.315238	-3.57851	0.000345565	0.00838775	TRUE	DOWN	ENST00000244763.9
MAD2L1	5.45344	0.952083	0.308215	3.08902	0.00200818	0.019579	TRUE	UP	ENSG00000164109.14		ATP5F1A-202	3.69159	-1.1314	0.387037	-2.92323	0.00346417	0.0499519	TRUE	DOWN	ENST00000398752.11
APLP2	5.68301	0.946983	0.306269	3.092	0.00198814	0.0194112	TRUE	UP	ENSG00000084234.18		ACTB-217	38.8393	-1.1323	0.127222	-8.90019	5.57526e-19	2.51802e-16	TRUE	DOWN	ENST00000646664.1
RPL9	26.8594	0.942746	0.147812	6.378	1.79413e-10	1.29442e-08	TRUE	UP	ENSG00000163682.17		RPL30-209	11.1201	-1.13581	0.230803	-4.92115	8.60383e-07	5.22799e-05	TRUE	DOWN	ENST00000521291.5
RPS15P4	7.37393	0.929488	0.283042	3.28393	0.00102372	0.0117138	TRUE	UP	ENSG00000233762.3		ATP5F1E-201	24.5864	-1.137	0.154893	-7.34052	2.12758e-13	4.20397e-11	TRUE	DOWN	ENST00000243997.8
ETFA	7.58443	0.922296	0.264718	3.48407	0.000493846	0.00664995	TRUE	UP	ENSG00000140374.17		ENO1-201	41.9399	-1.14908	0.11884	-9.66909	4.08004e-22	2.57981e-19	TRUE	DOWN	ENST00000234590.10
SRRM2	9.81773	0.919329	0.236682	3.88424	0.000102649	0.00193284	TRUE	UP	ENSG00000167978.18		NONO-201	3.72234	-1.15443	0.384931	-2.99906	0.00270817	0.0417103	TRUE	DOWN	ENST00000276079.13
HMGN1	11.5003	0.902864	0.212528	4.24822	2.15478e-05	0.000526721	TRUE	UP	ENSG00000205581.11		NPM1-204	17.785	-1.1551	0.184459	-6.26206	3.79917e-10	4.57564e-08	TRUE	DOWN	ENST00000517671.5
STAG2	4.83918	0.894318	0.332428	2.69026	0.00713965	0.0491811	TRUE	UP	ENSG00000101972.20		RPL37-201	71.5736	-1.16973	0.0935471	-12.5041	7.08734e-36	9.9585e-33	TRUE	DOWN	ENST00000274242.10
DDX3X	12.4359	0.892661	0.207892	4.29388	1.75579e-05	0.000449036	TRUE	UP	ENSG00000215301.11		YWHAZ-206	7.47721	-1.17112	0.280914	-4.16897	3.05975e-05	0.00116899	TRUE	DOWN	ENST00000395957.6
UBA2	6.56648	0.890829	0.284359	3.13277	0.00173168	0.0174286	TRUE	UP	ENSG00000126261.13		GCLM-201	4.52983	-1.18372	0.355405	-3.33063	0.000866502	0.0174765	TRUE	DOWN	ENST00000370238.8
CD164	9.9601	0.890711	0.306048	2.91036	0.00361009	0.0302353	TRUE	UP	ENSG00000135535.17		PCBP1-201	6.60036	-1.1901	0.295132	-4.03244	5.52011e-05	0.0018179	TRUE	DOWN	ENST00000303577.7
SNRNP200	5.67524	0.887178	0.304923	2.90951	0.00361993	0.0302353	TRUE	UP	ENSG00000144028.15		PTMS-201	5.52081	-1.19485	0.330108	-3.61957	0.000295097	0.00740435	TRUE	DOWN	ENST00000309083.8
SRSF5	9.34234	0.882679	0.245039	3.6022	0.000315537	0.00468196	TRUE	UP	ENSG00000100650.16		TM9SF2-201	5.2026	-1.19942	0.338595	-3.54234	0.000396594	0.00940961	TRUE	DOWN	ENST00000376387.5
ILF2	8.82816	0.871078	0.241756	3.60313	0.000314413	0.00468196	TRUE	UP	ENSG00000143621.17		GAL-201	6.83817	-1.20064	0.296646	-4.04739	5.1792e-05	0.00172358	TRUE	DOWN	ENST00000265643.4
BCAS2	5.96109	0.859609	0.302687	2.83993	0.00451236	0.0352654	TRUE	UP	ENSG00000116752.6		CCT5-201	15.1609	-1.20992	0.196061	-6.17113	6.78029e-10	7.58793e-08	TRUE	DOWN	ENST00000280326.9
VBP1	11.499	0.859551	0.213772	4.02087	5.79835e-05	0.00117929	TRUE	UP	ENSG00000155959.12		RPS20-201	10.0235	-1.21039	0.238639	-5.07205	3.93555e-07	2.59213e-05	TRUE	DOWN	ENST00000009589.8
RPS8	50.4652	0.827264	0.11066	7.47572	7.67833e-14	8.62742e-12	TRUE	UP	ENSG00000142937.12		NPM1-201	60.7431	-1.22959	0.102615	-11.9826	4.38596e-33	4.62207e-30	TRUE	DOWN	ENST00000296930.10
DNMT1	7.37093	0.77737	0.267807	2.90272	0.00369938	0.0306597	TRUE	UP	ENSG00000130816.17		ENO1-203	6.75528	-1.23141	0.299761	-4.10795	3.99178e-05	0.00143409	TRUE	DOWN	ENST00000464920.2
ILF3	9.34077	0.771836	0.239775	3.21899	0.00128641	0.0139732	TRUE	UP	ENSG00000129351.18		PKM-225	4.98122	-1.2436	0.343873	-3.61644	0.000298678	0.00747399	TRUE	DOWN	ENST00000698741.1
MORF4L1	14.4861	0.752276	0.194813	3.86153	0.00011268	0.00208732	TRUE	UP	ENSG00000185787.15		ATP5PD-201	6.26298	-1.24569	0.302485	-4.11819	3.81861e-05	0.00138765	TRUE	DOWN	ENST00000301587.9
HNRNPDL	9.52564	0.74826	0.235657	3.17521	0.00149727	0.0156199	TRUE	UP	ENSG00000152795.18		COX6C-206	3.87928	-1.26685	0.379796	-3.33561	0.000851129	0.0173045	TRUE	DOWN	ENST00000520517.5
S100A10	9.19699	0.734903	0.23505	3.12658	0.00176854	0.0177475	TRUE	UP	ENSG00000197747.9		RMRP-201	36.0255	-1.27055	0.234295	-5.42289	5.86425e-08	4.67292e-06	TRUE	DOWN	ENST00000363046.1
HNRNPD	12.7041	0.734564	0.201291	3.64927	0.000262988	0.00403936	TRUE	UP	ENSG00000138668.20		RPL41-201	4.33537	-1.27625	0.372755	-3.42382	0.000617475	0.0134863	TRUE	DOWN	ENST00000358888.7
RBMX	11.2486	0.728438	0.220991	3.29624	0.000979891	0.0113641	TRUE	UP	ENSG00000147274.14		YWHAG-201	4.51623	-1.28491	0.377678	-3.40214	0.000668594	0.0142822	TRUE	DOWN	ENST00000307630.5
BCLAF1	9.0832	0.724193	0.2405	3.01119	0.00260224	0.0237019	TRUE	UP	ENSG00000029363.17		ME1-201	4.28269	-1.29086	0.369479	-3.49374	0.000476298	0.0109371	TRUE	DOWN	ENST00000369705.4
RPS19	58.7429	0.717429	0.104804	6.84544	7.62423e-12	6.75666e-10	TRUE	UP	ENSG00000105372.8		PKM-203	3.21648	-1.29841	0.438085	-2.96383	0.00303838	0.0453105	TRUE	DOWN	ENST00000389093.7
RPS15	70.3897	0.709763	0.0906484	7.82984	4.88486e-15	6.85555e-13	TRUE	UP	ENSG00000115268.10		ACTB-213	8.38761	-1.30084	0.266088	-4.88878	1.01465e-06	6.08117e-05	TRUE	DOWN	ENST00000642480.2
TRIM28	8.10073	0.698864	0.253416	2.75777	0.00581973	0.0422995	TRUE	UP	ENSG00000130726.12		PPP1R14B-201	6.84629	-1.30556	0.295383	-4.41988	9.87546e-06	0.000454128	TRUE	DOWN	ENST00000309318.8
PRRC2C	10.5928	0.698679	0.226395	3.0861	0.00202799	0.0196473	TRUE	UP	ENSG00000117523.18		TXNDC17-201	5.24257	-1.32416	0.335774	-3.94361	8.02653e-05	0.00246368	TRUE	DOWN	ENST00000250101.10
H3-3A	13.8698	0.694938	0.197453	3.51951	0.000432352	0.00603532	TRUE	UP	ENSG00000163041.13		CYP51A1-201	3.76757	-1.3274	0.397366	-3.3405	0.000836274	0.0170298	TRUE	DOWN	ENST00000003100.13
NUCKS1	19.0817	0.673242	0.166039	4.05472	5.01945e-05	0.00104252	TRUE	UP	ENSG00000069275.13		AKR1B1-201	4.25575	-1.33222	0.379327	-3.51207	0.000444631	0.0103551	TRUE	DOWN	ENST00000285930.9
RPL18	35.7254	0.668512	0.131809	5.07183	3.94001e-07	1.56097e-05	TRUE	UP	ENSG00000063177.13		CLIC1-208	4.08504	-1.33287	0.377365	-3.53204	0.000412373	0.00970789	TRUE	DOWN	ENST00000375784.8
MT-RNR2	5387.97	0.66011	0.10469	6.30537	2.87515e-10	2.01085e-08	TRUE	UP	ENSG00000210082.2		MYL6-218	5.56027	-1.35794	0.326316	-4.16141	3.16289e-05	0.00120114	TRUE	DOWN	ENST00000550697.6
H2AC12	18.0977	0.620971	0.173958	3.56966	0.000357444	0.00515773	TRUE	UP	ENSG00000274997.2		ACTG1-213	3.41218	-1.36078	0.414847	-3.28019	0.00103736	0.02006	TRUE	DOWN	ENST00000576544.6
HNRNPC	26.8542	0.611515	0.146547	4.17283	3.00836e-05	0.000694252	TRUE	UP	ENSG00000092199.19		SNHG6-203	3.52708	-1.38017	0.423109	-3.26196	0.00110643	0.0210722	TRUE	DOWN	ENST00000520944.6
RANBP1	12.5137	0.580234	0.204829	2.83277	0.0046146	0.0356937	TRUE	UP	ENSG00000099901.17		DPM1-203	3.79394	-1.3827	0.397519	-3.47832	0.00050457	0.011374	TRUE	DOWN	ENST00000371588.10
SFPQ	19.3323	0.57276	0.165644	3.45777	0.00054467	0.00715166	TRUE	UP	ENSG00000116560.12		PLP2-202	6.73749	-1.39177	0.297571	-4.6771	2.90956e-06	0.00015525	TRUE	DOWN	ENST00000376327.6
RPL13	37.2546	0.570204	0.120852	4.7182	2.37935e-06	8.19501e-05	TRUE	UP	ENSG00000167526.14		GSTP1-202	10.9094	-1.40826	0.234951	-5.99382	2.04962e-09	2.05711e-07	TRUE	DOWN	ENST00000398606.10
EEF2	23.887	0.550179	0.147932	3.71914	0.000199904	0.00323911	TRUE	UP	ENSG00000167658.16		MT-TN-201	11.3832	-1.41171	0.230612	-6.12157	9.26601e-10	9.86831e-08	TRUE	DOWN	ENST00000387400.1
NCL	17.1588	0.547127	0.176745	3.09557	0.00196438	0.0192341	TRUE	UP	ENSG00000115053.17		TXNL1-201	2.72899	-1.43442	0.478575	-2.99727	0.00272407	0.0418573	TRUE	DOWN	ENST00000217515.11
MT-RNR1	1821.93	0.524826	0.111764	4.69582	2.65544e-06	8.87823e-05	TRUE	UP	ENSG00000211459.2		EIF5A-202	7.97788	-1.43499	0.28212	-5.08645	3.6482e-07	2.42817e-05	TRUE	DOWN	ENST00000336458.13
RPL36AP37	43.1203	0.515047	0.120381	4.27849	1.88167e-05	0.000475902	TRUE	UP	ENSG00000244398.1		ATP5MK-201	5.18561	-1.43537	0.34612	-4.14701	3.36839e-05	0.00126026	TRUE	DOWN	ENST00000309579.7
ARF1	16.5143	0.501289	0.180225	2.78146	0.00541158	0.040084	TRUE	UP	ENSG00000143761.17		SAR1B-201	3.77577	-1.44122	0.417417	-3.45272	0.000554971	0.0123559	TRUE	DOWN	ENST00000402673.7
ENSG00000281383	35.657	0.496377	0.12894	3.84967	0.000118275	0.00217334	TRUE	UP	ENSG00000281383.1		HSPD1-221	7.23423	-1.44483	0.296281	-4.87655	1.07955e-06	6.40938e-05	TRUE	DOWN	ENST00000678621.1
RPS4X	48.247	0.493167	0.106428	4.63383	3.58959e-06	0.000112858	TRUE	UP	ENSG00000198034.11		BZW1-203	14.0194	-1.44536	0.214238	-6.74649	1.51462e-11	2.10483e-09	TRUE	DOWN	ENST00000409600.6
RBBP7	19.2711	0.468742	0.167081	2.80548	0.00502413	0.0381345	TRUE	UP	ENSG00000102054.18		DNAJC2-203	3.08247	-1.45094	0.447467	-3.24256	0.00118462	0.0222265	TRUE	DOWN	ENST00000379263.8
RPL31	67.799	0.388733	0.0903506	4.30249	1.68889e-05	0.000436816	TRUE	UP	ENSG00000071082.11		ACTB-221	4.28448	-1.45349	0.390878	-3.71853	0.000200389	0.00541478	TRUE	DOWN	ENST00000676189.1
MT-CYB	123.546	0.372424	0.075005	4.96532	6.85889e-07	2.61171e-05	TRUE	UP	ENSG00000198727.2		VMP1-201	4.11388	-1.4544	0.383047	-3.79693	0.000146498	0.00412608	TRUE	DOWN	ENST00000262291.9
5_8S_rRNA	106.127	0.331089	0.0953494	3.47238	0.000515865	0.00687887	TRUE	UP	ENSG00000275757.1		PKM-202	11.6164	-1.48702	0.229307	-6.48485	8.88206e-11	1.12323e-08	TRUE	DOWN	ENST00000335181.10
ENSG00000281181	471.852	0.288928	0.0738261	3.91364	9.0917e-05	0.00176969	TRUE	UP	ENSG00000281181.1		ENO1-216	3.81736	-1.4897	0.409726	-3.63586	0.000277059	0.00703551	TRUE	DOWN	ENST00000647408.1
ENSG00000280614	1633.33	0.252025	0.07749	3.25235	0.00114454	0.0127397	TRUE	UP	ENSG00000280614.1		PRKAA1-204	2.34201	-1.49489	0.507541	-2.94535	0.00322588	0.0476571	TRUE	DOWN	ENST00000397128.7
ENSG00000280800	1640.41	0.231064	0.0803335	2.8763	0.00402363	0.0323923	TRUE	UP	ENSG00000280800.1		RPL22L1-201	9.75443	-1.49508	0.255631	-5.84857	4.9581e-09	4.64446e-07	TRUE	DOWN	ENST00000295830.13
MT-CO1	135.551	-0.278172	0.0735687	-3.78112	0.000156123	0.00270022	TRUE	DOWN	ENSG00000198804.2		RPS7-201	3.9435	-1.4973	0.402301	-3.72183	0.000197782	0.00537882	TRUE	DOWN	ENST00000403564.5
MT-CO2	245.876	-0.310327	0.0583356	-5.31968	1.03948e-07	4.45287e-06	TRUE	DOWN	ENSG00000198712.1		HSPA9-201	4.35062	-1.50798	0.380177	-3.96651	7.29329e-05	0.00226612	TRUE	DOWN	ENST00000297185.9
MT-ND2	102.514	-0.363481	0.0876546	-4.14674	3.37243e-05	0.000767061	TRUE	DOWN	ENSG00000198763.3		IER3IP1-201	3.27421	-1.51921	0.433185	-3.50708	0.00045305	0.0104932	TRUE	DOWN	ENST00000256433.6
RPS14	60.3521	-0.379745	0.0942752	-4.02805	5.62423e-05	0.0011507	TRUE	DOWN	ENSG00000164587.13		PGK1-206	3.28745	-1.52777	0.44084	-3.46558	0.000529087	0.0118422	TRUE	DOWN	ENST00000644362.1
RPL19	31.699	-0.398169	0.134866	-2.95234	0.00315376	0.0273966	TRUE	DOWN	ENSG00000108298.12		NDUFA5-201	3.70445	-1.52791	0.409443	-3.73167	0.000190217	0.00519544	TRUE	DOWN	ENST00000355749.7
RPS24	54.9166	-0.428841	0.104748	-4.09404	4.23927e-05	0.000905171	TRUE	DOWN	ENSG00000138326.21		SLF1-201	2.58317	-1.52829	0.494987	-3.08754	0.0020182	0.0334936	TRUE	DOWN	ENST00000265140.10
RPL12	39.2575	-0.447064	0.119225	-3.74976	0.000177007	0.00294468	TRUE	DOWN	ENSG00000197958.13		TUBA1C-201	19.3426	-1.53961	0.181254	-8.49417	1.99345e-17	7.41447e-15	TRUE	DOWN	ENST00000301072.11
ENSG00000237550	20.5445	-0.484565	0.158898	-3.04953	0.00229199	0.0214364	TRUE	DOWN	ENSG00000237550.7		IFITM2-205	3.16378	-1.54552	0.44145	-3.50101	0.000463495	0.0106959	TRUE	DOWN	ENST00000616316.3
ATP5F1C	16.0569	-0.489443	0.179323	-2.72939	0.0063452	0.0450616	TRUE	DOWN	ENSG00000165629.20		TARS1-201	5.49582	-1.59322	0.340391	-4.68058	2.8607e-06	0.00015329	TRUE	DOWN	ENST00000265112.8
RPL8	33.7884	-0.503956	0.128889	-3.91001	9.22935e-05	0.00178059	TRUE	DOWN	ENSG00000161016.18		ENST00000370651	4.28917	-1.59398	0.382224	-4.17027	3.04244e-05	0.0011659	TRUE	DOWN	ENST00000370651.7
NAP1L1	14.8013	-0.524063	0.188238	-2.78405	0.00536853	0.0398655	TRUE	DOWN	ENSG00000187109.15		PRELID3B-201	5.23385	-1.59594	0.353274	-4.51756	6.25567e-06	0.000307818	TRUE	DOWN	ENST00000355937.9
HDGF	13.4195	-0.534162	0.197501	-2.7046	0.0068386	0.0478325	TRUE	DOWN	ENSG00000143321.19		EIF4B-201	16.3995	-1.60606	0.202417	-7.93441	2.11501e-15	5.45844e-13	TRUE	DOWN	ENST00000262056.14
CYCS	29.7418	-0.571993	0.135508	-4.22111	2.431e-05	0.00058056	TRUE	DOWN	ENSG00000172115.9		KRT18-201	3.80039	-1.6287	0.407997	-3.99195	6.55315e-05	0.00206661	TRUE	DOWN	ENST00000388835.4
MT-ND4	49.1313	-0.572127	0.11692	-4.89331	9.91554e-07	3.73413e-05	TRUE	DOWN	ENSG00000198886.2		PBK-201	5.5914	-1.64241	0.337647	-4.86427	1.14881e-06	6.75714e-05	TRUE	DOWN	ENST00000301905.9
TAGLN2	18.6199	-0.578478	0.168317	-3.43685	0.000588526	0.00765419	TRUE	DOWN	ENSG00000158710.15		FLNA-202	2.17306	-1.64593	0.540382	-3.04586	0.00232017	0.0370934	TRUE	DOWN	ENST00000369850.10
CANX	15.5143	-0.582219	0.183914	-3.16572	0.00154701	0.0159928	TRUE	DOWN	ENSG00000127022.16		GSR-201	3.42736	-1.65253	0.439616	-3.75902	0.000170577	0.00470987	TRUE	DOWN	ENST00000221130.11
RPL7P9	19.6039	-0.588622	0.166998	-3.52472	0.000423927	0.00594191	TRUE	DOWN	ENSG00000137970.7		ETF1-202	2.98528	-1.65346	0.481788	-3.43192	0.000599327	0.013227	TRUE	DOWN	ENST00000499810.6
RPL13A	31.984	-0.588672	0.128375	-4.58558	4.52726e-06	0.000140407	TRUE	DOWN	ENSG00000142541.18		NPM1-203	4.80619	-1.66768	0.368891	-4.5208	6.16055e-06	0.000304322	TRUE	DOWN	ENST00000393820.2
RPL14	34.0894	-0.594683	0.126543	-4.69947	2.6084e-06	8.76372e-05	TRUE	DOWN	ENSG00000188846.14		HSPD1-202	29.0525	-1.67387	0.150913	-11.0916	1.37828e-28	1.16198e-25	TRUE	DOWN	ENST00000388968.8
RPS12	27.9327	-0.597015	0.13668	-4.36799	1.25396e-05	0.000339708	TRUE	DOWN	ENSG00000112306.8		HSPA8-224	13.9657	-1.72801	0.220705	-7.82951	4.89783e-15	1.18225e-12	TRUE	DOWN	ENST00000534624.6
NONO	15.6718	-0.61266	0.181014	-3.3846	0.000712829	0.00881901	TRUE	DOWN	ENSG00000147140.17		TMEM14B-202	5.84769	-1.7346	0.336395	-5.15645	2.51679e-07	1.74876e-05	TRUE	DOWN	ENST00000379542.10
RPL41	32.5154	-0.619422	0.138345	-4.47738	7.55637e-06	0.000214902	TRUE	DOWN	ENSG00000229117.9		TUBA1C-202	4.7475	-1.75507	0.375668	-4.67187	2.98476e-06	0.000158594	TRUE	DOWN	ENST00000541364.5
NDUFAB1	9.79148	-0.640584	0.231091	-2.772	0.00557135	0.0409722	TRUE	DOWN	ENSG00000004779.10		ATP5MC2-209	2.09738	-1.79218	0.566593	-3.16308	0.00156111	0.027611	TRUE	DOWN	ENST00000673498.1
RAN	31.4207	-0.649972	0.130871	-4.96652	6.81633e-07	2.61001e-05	TRUE	DOWN	ENSG00000132341.12		LRRFIP1-201	1.92471	-1.79868	0.595942	-3.01821	0.00254275	0.0396982	TRUE	DOWN	ENST00000244815.9
RPL7	45.2863	-0.655099	0.119072	-5.50171	3.76117e-08	1.76569e-06	TRUE	DOWN	ENSG00000147604.14		TMSB10-201	26.8543	-1.82417	0.160945	-11.3341	8.8924e-30	8.65025e-27	TRUE	DOWN	ENST00000233143.6
PSMA7	8.68636	-0.660716	0.245175	-2.69487	0.00704155	0.0488985	TRUE	DOWN	ENSG00000101182.15		SNHG29-204	3.28228	-1.8244	0.456158	-3.9995	6.34759e-05	0.00201687	TRUE	DOWN	ENST00000475947.7
ACTG1	77.28	-0.681565	0.0927504	-7.34837	2.00631e-13	2.11558e-11	TRUE	DOWN	ENSG00000184009.13		TKT-207	7.53085	-1.85238	0.299631	-6.1822	6.32124e-10	7.20166e-08	TRUE	DOWN	ENST00000462138.6
RPL27A	63.9297	-0.693021	0.097603	-7.10041	1.24387e-12	1.18409e-10	TRUE	DOWN	ENSG00000166441.13		ADAM9-209	2.68274	-1.85832	0.517841	-3.5886	0.000332462	0.00813213	TRUE	DOWN	ENST00000487273.7
GNAS	13.9694	-0.698155	0.205713	-3.39384	0.000689212	0.00861643	TRUE	DOWN	ENSG00000087460.29		ACTB-206	1.87381	-1.86378	0.623076	-2.99126	0.00277833	0.0424627	TRUE	DOWN	ENST00000462494.5
C1orf43	11.1589	-0.705105	0.216717	-3.25358	0.00113963	0.0127215	TRUE	DOWN	ENSG00000143612.21		HMGA1-201	2.29408	-1.87271	0.548699	-3.413	0.000642515	0.0139131	TRUE	DOWN	ENST00000311487.9
PPIA	104.083	-0.718313	0.0840728	-8.54394	1.29725e-17	2.69435e-15	TRUE	DOWN	ENSG00000196262.15		COX7B-204	2.26799	-1.87833	0.553147	-3.39571	0.000684507	0.0145484	TRUE	DOWN	ENST00000650309.2
LMAN1	8.24262	-0.723246	0.254876	-2.83764	0.0045449	0.035417	TRUE	DOWN	ENSG00000074695.6		BRI3-201	2.38017	-1.87914	0.551481	-3.40745	0.000655734	0.0141612	TRUE	DOWN	ENST00000297290.4
ARPC5	9.66019	-0.730878	0.229053	-3.19087	0.00141845	0.0150188	TRUE	DOWN	ENSG00000162704.16		DSTN-201	10.4682	-1.88446	0.260752	-7.22701	4.93761e-13	9.31955e-11	TRUE	DOWN	ENST00000246069.12
ENSG00000196656	39.4811	-0.750729	0.127061	-5.90843	3.45384e-09	1.97272e-07	TRUE	DOWN	ENSG00000196656.7		PRDX1-204	7.35801	-1.89259	0.313563	-6.03575	1.58222e-09	1.65361e-07	TRUE	DOWN	ENST00000424390.2
RPLP0	65.7683	-0.750774	0.101333	-7.409	1.27253e-13	1.38443e-11	TRUE	DOWN	ENSG00000089157.16		HSPA8-218	4.17557	-1.89645	0.416256	-4.55597	5.21441e-06	0.000263766	TRUE	DOWN	ENST00000532636.5
CKS2	10.7747	-0.761426	0.218891	-3.47856	0.000504108	0.00676156	TRUE	DOWN	ENSG00000123975.5		MRPS28-201	2.01832	-1.89746	0.588918	-3.22194	0.00127326	0.0234075	TRUE	DOWN	ENST00000276585.9
COX6C	7.55118	-0.769493	0.266703	-2.8852	0.00391161	0.0317902	TRUE	DOWN	ENSG00000164919.11		MRPS30-202	2.80608	-1.91333	0.509275	-3.75696	0.00017199	0.00473854	TRUE	DOWN	ENST00000507110.6
RARS1	10.0548	-0.791995	0.230819	-3.43123	0.00060084	0.00775548	TRUE	DOWN	ENSG00000113643.9		LMNA-205	2.90147	-1.92057	0.503948	-3.81105	0.000138376	0.00394124	TRUE	DOWN	ENST00000368300.9
VDAC1	14.7151	-0.792988	0.1897	-4.18023	2.91217e-05	0.000676611	TRUE	DOWN	ENSG00000213585.11		PGK1-201	14.3125	-1.92354	0.223425	-8.60936	7.34704e-18	2.90346e-15	TRUE	DOWN	ENST00000373316.5
ELOC	6.53983	-0.805812	0.281231	-2.8653	0.00416617	0.0330359	TRUE	DOWN	ENSG00000154582.18		TMEM14C-201	9.33614	-1.94057	0.279652	-6.93922	3.94273e-12	6.40035e-10	TRUE	DOWN	ENST00000229563.6
SCD	8.75109	-0.811246	0.250992	-3.23216	0.00122859	0.0134211	TRUE	DOWN	ENSG00000099194.6		ATP5MC1-201	4.36851	-1.94459	0.404624	-4.80593	1.54037e-06	8.81427e-05	TRUE	DOWN	ENST00000355938.9
ATP5F1B	14.6062	-0.811607	0.194442	-4.17404	2.99246e-05	0.000692917	TRUE	DOWN	ENSG00000110955.9		LDHA-204	1.59175	-1.95189	0.664169	-2.93885	0.00329437	0.0484426	TRUE	DOWN	ENST00000396222.6
EIF3M	13.5143	-0.820807	0.197958	-4.14638	3.37774e-05	0.000767061	TRUE	DOWN	ENSG00000149100.13		SLC38A1-201	8.2197	-1.97079	0.296531	-6.64613	3.0089e-11	4.09146e-09	TRUE	DOWN	ENST00000398637.10
HINT1	23.2459	-0.822233	0.155406	-5.29088	1.21728e-07	5.11854e-06	TRUE	DOWN	ENSG00000169567.13		TIMP1-201	5.5057	-1.97342	0.360655	-5.47178	4.45536e-08	3.6586e-06	TRUE	DOWN	ENST00000218388.9
EPRS1	9.01639	-0.822575	0.251941	-3.26495	0.00109485	0.0123626	TRUE	DOWN	ENSG00000136628.18		MBD2-201	2.11142	-1.9751	0.590851	-3.3428	0.000829376	0.0169439	TRUE	DOWN	ENST00000256429.8
RPS21	61.6855	-0.844464	0.102001	-8.279	1.24218e-16	2.30105e-14	TRUE	DOWN	ENSG00000171858.18		TSC22D1-201	2.64017	-1.97926	0.527944	-3.74899	0.000177547	0.00487041	TRUE	DOWN	ENST00000261489.6
PSMA5	8.41726	-0.852554	0.250445	-3.40416	0.000663683	0.00837732	TRUE	DOWN	ENSG00000143106.13		HSPE1-201	36.6766	-2.00269	0.146752	-13.6468	2.1097e-42	4.44655e-39	TRUE	DOWN	ENST00000233893.10
VDAC3	5.40646	-0.866436	0.309968	-2.79525	0.00518602	0.03872	TRUE	DOWN	ENSG00000078668.14		LIMA1-214	1.63363	-2.00542	0.671128	-2.98813	0.00280686	0.0428173	TRUE	DOWN	ENST00000552783.5
ATP5F1A	8.89872	-0.872812	0.243887	-3.57876	0.000345234	0.00502385	TRUE	DOWN	ENSG00000152234.16		PAK1IP1-201	2.73136	-2.0251	0.521362	-3.88424	0.000102649	0.00304718	TRUE	DOWN	ENST00000379568.4
HSP90AB1	38.4273	-0.877737	0.129062	-6.80087	1.03987e-11	8.90911e-10	TRUE	DOWN	ENSG00000096384.20		CDK6-201	1.79888	-2.0415	0.670469	-3.04488	0.00232776	0.0371018	TRUE	DOWN	ENST00000265734.8
B2M	25.2472	-0.882792	0.149871	-5.89036	3.85356e-09	2.18283e-07	TRUE	DOWN	ENSG00000166710.23		HSPA8-201	4.26525	-2.04918	0.415639	-4.9302	8.21473e-07	5.05334e-05	TRUE	DOWN	ENST00000227378.7
RPS7	43.2844	-0.892627	0.117023	-7.62781	2.38773e-14	2.97555e-12	TRUE	DOWN	ENSG00000171863.15		PRDX5-201	3.31114	-2.09456	0.487593	-4.29572	1.74124e-05	0.000731552	TRUE	DOWN	ENST00000265462.9
SLC38A2	7.88056	-0.899046	0.264194	-3.40297	0.00066657	0.00839829	TRUE	DOWN	ENSG00000134294.14		S100A11-201	12.3687	-2.09493	0.253542	-8.26266	1.4246e-16	4.86907e-14	TRUE	DOWN	ENST00000271638.3
CALU	7.73878	-0.909121	0.266167	-3.4156	0.000636415	0.00810778	TRUE	DOWN	ENSG00000128595.17		NPM1-229	4.21333	-2.11365	0.425954	-4.96215	6.97186e-07	4.40831e-05	TRUE	DOWN	ENST00000678280.1
SIGMAR1	5.1209	-0.91261	0.322341	-2.8312	0.00463744	0.035794	TRUE	DOWN	ENSG00000147955.18		SNHG6-205	2.29034	-2.11424	0.57344	-3.68695	0.000226962	0.00600234	TRUE	DOWN	ENST00000521399.7
HSPH1	4.98173	-0.913984	0.34005	-2.68779	0.00719264	0.0493238	TRUE	DOWN	ENSG00000120694.20		TFRC-201	2.69159	-2.1296	0.54086	-3.93743	8.2358e-05	0.00252179	TRUE	DOWN	ENST00000360110.9
MT-CO3	200.696	-0.933592	0.075541	-12.3587	4.36907e-35	2.72233e-32	TRUE	DOWN	ENSG00000198938.2		PDCD6-201	2.10179	-2.16457	0.609289	-3.55261	0.000381426	0.00910097	TRUE	DOWN	ENST00000264933.9
FLNA	12.2357	-0.941276	0.215836	-4.36106	1.29433e-05	0.000346536	TRUE	DOWN	ENSG00000196924.19		BACE2-202	2.38946	-2.17398	0.567676	-3.82961	0.000128349	0.00370571	TRUE	DOWN	ENST00000330333.11
SLC25A3	22.503	-0.947065	0.158874	-5.96112	2.50513e-09	1.51948e-07	TRUE	DOWN	ENSG00000075415.15		TGFB1-201	1.61767	-2.17615	0.696127	-3.12608	0.0017715	0.0304742	TRUE	DOWN	ENST00000221930.6
DNTTIP2	5.81153	-0.947085	0.30216	-3.13439	0.00172213	0.0173963	TRUE	DOWN	ENSG00000067334.14		FTL-201	44.5334	-2.19471	0.173213	-12.6706	8.6023e-37	1.35981e-33	TRUE	DOWN	ENST00000331825.11
RAB1A	6.37802	-0.947754	0.292152	-3.24405	0.00117843	0.0130484	TRUE	DOWN	ENSG00000138069.18		HOXC10-201	2.36104	-2.20007	0.576624	-3.81543	0.000135947	0.00388078	TRUE	DOWN	ENST00000303460.5
RPN2	5.07872	-0.96547	0.32962	-2.92904	0.00340009	0.0290214	TRUE	DOWN	ENSG00000118705.18		COL4A2-201	1.3286	-2.21369	0.740105	-2.99104	0.00278025	0.0424627	TRUE	DOWN	ENST00000360467.7
CAPZA2	4.8318	-0.968358	0.333994	-2.89932	0.00373968	0.0309562	TRUE	DOWN	ENSG00000198898.15		PDHA1-205	2.70546	-2.21746	0.539414	-4.11088	3.94156e-05	0.00142414	TRUE	DOWN	ENST00000422285.7
RTN4	11.3944	-0.968515	0.223285	-4.33757	1.44068e-05	0.000381252	TRUE	DOWN	ENSG00000115310.19		BEST1-202	1.33659	-2.22509	0.758825	-2.93228	0.00336483	0.048955	TRUE	DOWN	ENST00000449131.6
SUB1	19.2257	-0.973612	0.172245	-5.65248	1.58148e-08	8.2117e-07	TRUE	DOWN	ENSG00000113387.12		SQSTM1-201	3.05685	-2.23946	0.516529	-4.33559	1.45367e-05	0.000625277	TRUE	DOWN	ENST00000360718.5
PABPC1	17.7304	-0.983236	0.180091	-5.45965	4.77068e-08	2.17988e-06	TRUE	DOWN	ENSG00000070756.17		COX20-203	2.1683	-2.24588	0.605166	-3.71118	0.000206299	0.00556258	TRUE	DOWN	ENST00000411948.7
GAPDH	6.88222	-0.985062	0.280721	-3.50905	0.000449719	0.00620196	TRUE	DOWN	ENSG00000111640.15		HSPB8-201	1.25946	-2.25311	0.769795	-2.92689	0.0034237	0.0495318	TRUE	DOWN	ENST00000281938.7
CD63	8.52817	-0.997498	0.255729	-3.9006	9.59542e-05	0.00183195	TRUE	DOWN	ENSG00000135404.12		CTSC-203	1.71667	-2.2539	0.688572	-3.2733	0.001063	0.0204496	TRUE	DOWN	ENST00000524463.6
COMMD6	4.43731	-1.00752	0.344131	-2.92773	0.0034145	0.0290849	TRUE	DOWN	ENSG00000188243.14		MCAM-201	2.40932	-2.25579	0.569927	-3.95803	7.55693e-05	0.00234228	TRUE	DOWN	ENST00000264036.6
TXNDC17	7.48971	-1.01552	0.268741	-3.77881	0.000157579	0.00271279	TRUE	DOWN	ENSG00000129235.11		TXNRD1-201	2.70673	-2.25951	0.537847	-4.20103	2.65706e-05	0.001046	TRUE	DOWN	ENST00000503506.6
TIMM17A	8.49948	-1.01611	0.257973	-3.93882	8.18821e-05	0.00161735	TRUE	DOWN	ENSG00000134375.11		OXCT1-201	2.85341	-2.26258	0.533993	-4.2371	2.26428e-05	0.000903284	TRUE	DOWN	ENST00000196371.10
RPS20	50.425	-1.01796	0.109293	-9.31404	1.23056e-20	3.83376e-18	TRUE	DOWN	ENSG00000008988.11		COTL1-201	2.66949	-2.28965	0.557825	-4.10461	4.05e-05	0.00144271	TRUE	DOWN	ENST00000262428.5
BRIX1	7.17188	-1.02058	0.275391	-3.70595	0.000210597	0.00337251	TRUE	DOWN	ENSG00000113460.13		CD59-211	3.07082	-2.29814	0.510217	-4.50424	6.66111e-06	0.000325237	TRUE	DOWN	ENST00000642928.2
TAF1D	4.94955	-1.0276	0.341293	-3.0109	0.00260474	0.0237019	TRUE	DOWN	ENSG00000166012.17		HSPD1-201	2.96818	-2.30884	0.52977	-4.3582	1.31138e-05	0.000575822	TRUE	DOWN	ENST00000345042.6
YWHAZ	20.0742	-1.02893	0.173704	-5.92347	3.15226e-09	1.81559e-07	TRUE	DOWN	ENSG00000164924.18		GALNT2-201	3.92319	-2.31723	0.470951	-4.92032	8.64028e-07	5.22799e-05	TRUE	DOWN	ENST00000366672.5
MT-ND1	112.349	-1.03035	0.0822304	-12.53	5.11682e-36	3.50707e-33	TRUE	DOWN	ENSG00000198888.2		MYC-206	1.52112	-2.31754	0.735853	-3.14945	0.00163576	0.0285332	TRUE	DOWN	ENST00000621592.8
INTS13	3.91289	-1.03941	0.383752	-2.70855	0.00675785	0.0473603	TRUE	DOWN	ENSG00000064102.15		ACADM-202	1.78605	-2.31995	0.693213	-3.34667	0.000817891	0.0167363	TRUE	DOWN	ENST00000370841.9
RPS27A	51.3123	-1.04077	0.112225	-9.27398	1.79323e-20	5.34381e-18	TRUE	DOWN	ENSG00000143947.15		JUNB-201	1.49812	-2.33204	0.723171	-3.22474	0.00126085	0.023277	TRUE	DOWN	ENST00000302754.6
TXNL1	3.98764	-1.04397	0.376101	-2.77576	0.00550729	0.0406318	TRUE	DOWN	ENSG00000091164.13		GALNT2-202	1.58105	-2.34557	0.733825	-3.19636	0.00139173	0.0251787	TRUE	DOWN	ENST00000485438.1
CISD1	4.90132	-1.04569	0.337184	-3.10126	0.001927	0.0189255	TRUE	DOWN	ENSG00000122873.12		PTP4A1-203	4.16897	-2.34973	0.445987	-5.26861	1.37463e-07	1.02256e-05	TRUE	DOWN	ENST00000626021.3
ANXA2	22.0488	-1.05112	0.159035	-6.60939	3.85897e-11	3.00561e-09	TRUE	DOWN	ENSG00000182718.18		ARPC1B-222	1.25274	-2.35282	0.777721	-3.02527	0.0024841	0.0388786	TRUE	DOWN	ENST00000646101.2
NDUFA5	6.24515	-1.07113	0.296286	-3.6152	0.000300122	0.00450117	TRUE	DOWN	ENSG00000128609.16		TNFRSF1A-201	1.18949	-2.35909	0.778419	-3.03061	0.00244057	0.0383581	TRUE	DOWN	ENST00000162749.7
NDUFB3	7.97099	-1.07899	0.265971	-4.05677	4.97556e-05	0.00103971	TRUE	DOWN	ENSG00000119013.10		NPM1-220	5.07133	-2.3614	0.406662	-5.80679	6.36826e-09	5.87832e-07	TRUE	DOWN	ENST00000677467.1
TRAM1	4.7236	-1.07955	0.339736	-3.17761	0.00148497	0.0155324	TRUE	DOWN	ENSG00000067167.8		MRPL33-201	2.39036	-2.36675	0.590841	-4.00573	6.18265e-05	0.00197482	TRUE	DOWN	ENST00000296102.8
LDHA	42.6162	-1.08193	0.118253	-9.14922	5.73477e-20	1.51177e-17	TRUE	DOWN	ENSG00000134333.15		SRXN1-201	1.20996	-2.39363	0.784193	-3.05235	0.00227061	0.036393	TRUE	DOWN	ENST00000381962.4
KARS1	4.53068	-1.08273	0.351543	-3.07994	0.00207045	0.0198751	TRUE	DOWN	ENSG00000065427.15		TPM1-206	1.27222	-2.39425	0.77914	-3.07294	0.00211958	0.0348107	TRUE	DOWN	ENST00000358278.7
EIF2S3	20.1725	-1.09116	0.167284	-6.52283	6.8991e-11	5.19631e-09	TRUE	DOWN	ENSG00000130741.11		SQSTM1-202	6.95525	-2.40187	0.347111	-6.9196	4.52918e-12	7.25013e-10	TRUE	DOWN	ENST00000389805.9
DAZAP2	8.81885	-1.09669	0.258615	-4.24061	2.22913e-05	0.000539874	TRUE	DOWN	ENSG00000183283.16		NPM1-208	1.0005	-2.41505	0.824449	-2.92929	0.00339734	0.0492693	TRUE	DOWN	ENST00000521672.6
ETF1	7.21993	-1.09815	0.288486	-3.80661	0.000140885	0.00250161	TRUE	DOWN	ENSG00000120705.13		PDLIM7-202	1.03338	-2.41633	0.814337	-2.96723	0.00300493	0.0451311	TRUE	DOWN	ENST00000355841.7
TPM4	6.51867	-1.10352	0.289455	-3.81242	0.000137613	0.00244986	TRUE	DOWN	ENSG00000167460.17		SNHG19-201	2.76089	-2.44011	0.560463	-4.35375	1.33829e-05	0.000585606	TRUE	DOWN	ENST00000563192.2
ATP5PB	19.4409	-1.1065	0.177077	-6.24865	4.1401e-10	2.83763e-08	TRUE	DOWN	ENSG00000116459.11		PPP2R1B-206	1.10945	-2.4845	0.807254	-3.07772	0.00208592	0.0343778	TRUE	DOWN	ENST00000527614.6
SLC25A13	3.55302	-1.10869	0.404884	-2.73829	0.00617587	0.0441865	TRUE	DOWN	ENSG00000004864.14		HSPD1-222	1.93019	-2.48988	0.669182	-3.72078	0.000198609	0.00538973	TRUE	DOWN	ENST00000678761.1
TM9SF2	7.05968	-1.11039	0.284297	-3.90573	9.3942e-05	0.00180345	TRUE	DOWN	ENSG00000125304.10		HSPD1-207	1.85353	-2.49245	0.685041	-3.6384	0.000274341	0.00700169	TRUE	DOWN	ENST00000439605.2
RDX	3.60805	-1.1236	0.395091	-2.8439	0.00445646	0.0350282	TRUE	DOWN	ENSG00000137710.17		ROCK2-202	1.12413	-2.49764	0.793782	-3.1465	0.00165235	0.0287422	TRUE	DOWN	ENST00000315872.11
SEC61G	6.53186	-1.13152	0.295343	-3.8312	0.00012752	0.00231223	TRUE	DOWN	ENSG00000132432.14		SLC38A1-206	0.95526	-2.52845	0.841661	-3.00412	0.00266354	0.0412278	TRUE	DOWN	ENST00000549049.5
NFIC	3.14171	-1.13948	0.421548	-2.70308	0.00686995	0.0479246	TRUE	DOWN	ENSG00000141905.19		TFB2M-201	2.19854	-2.53109	0.63032	-4.01556	5.93036e-05	0.00191315	TRUE	DOWN	ENST00000366514.5
NOLC1	6.25386	-1.15025	0.310232	-3.70769	0.000209155	0.00335726	TRUE	DOWN	ENSG00000166197.17		HSPB1-211	1.36797	-2.53647	0.755731	-3.35631	0.000789902	0.0162161	TRUE	DOWN	ENST00000675417.1
ACTB	79.7659	-1.15921	0.0967978	-11.9756	4.77116e-33	2.5155e-30	TRUE	DOWN	ENSG00000075624.17		COL4A1-201	1.13089	-2.54909	0.794491	-3.20845	0.00133452	0.0243175	TRUE	DOWN	ENST00000375820.10
ERP29	3.29047	-1.17493	0.420741	-2.79252	0.00522992	0.0390053	TRUE	DOWN	ENSG00000089248.7		GHITM-213	2.55803	-2.55509	0.58552	-4.36379	1.27828e-05	0.000563244	TRUE	DOWN	ENST00000692871.1
SYPL1	4.88249	-1.17717	0.3428	-3.43399	0.000594768	0.00770613	TRUE	DOWN	ENSG00000008282.10		TNFRSF12A-201	2.02978	-2.5733	0.666497	-3.86094	0.000112952	0.00331415	TRUE	DOWN	ENST00000326577.9
ITGB1	10.4549	-1.18217	0.234623	-5.03861	4.68916e-07	1.82611e-05	TRUE	DOWN	ENSG00000150093.20		ID1-202	2.4091	-2.57451	0.622132	-4.13821	3.50023e-05	0.00130188	TRUE	DOWN	ENST00000376112.4
EIF3E	3.50363	-1.20925	0.411288	-2.94014	0.0032806	0.0282261	TRUE	DOWN	ENSG00000104408.11		IPO5-201	1.41294	-2.57504	0.746447	-3.44972	0.000561163	0.0124718	TRUE	DOWN	ENST00000261574.10
LRRFIP1	3.65752	-1.2125	0.401472	-3.02013	0.00252663	0.0231208	TRUE	DOWN	ENSG00000124831.20		HSPD1-203	2.18129	-2.61048	0.663626	-3.93366	8.36614e-05	0.00254908	TRUE	DOWN	ENST00000418022.2
ATP5F1E	25.2471	-1.21407	0.155537	-7.80564	5.91984e-15	8.11491e-13	TRUE	DOWN	ENSG00000124172.10		FAM102B-201	0.96834	-2.63185	0.832454	-3.16156	0.00156926	0.0276776	TRUE	DOWN	ENST00000370035.8
WDR75	4.4136	-1.21493	0.362648	-3.35018	0.000807603	0.00976246	TRUE	DOWN	ENSG00000115368.10		SLC2A4RG-201	0.955032	-2.63467	0.843742	-3.12261	0.00179256	0.0307165	TRUE	DOWN	ENST00000266077.5
EIF3C	4.69523	-1.22196	0.345641	-3.53535	0.000407241	0.00575511	TRUE	DOWN	ENSG00000184110.15		ARF4-204	0.929484	-2.63809	0.846179	-3.11765	0.00182299	0.0311113	TRUE	DOWN	ENST00000486310.5
RPL37	80.9814	-1.2247	0.0875476	-13.9889	1.82112e-44	2.08032e-41	TRUE	DOWN	ENSG00000145592.14		NPM1-227	2.07474	-2.65132	0.666524	-3.97783	6.95464e-05	0.00217694	TRUE	DOWN	ENST00000678186.1
RPS7P1	3.8281	-1.2317	0.390009	-3.15815	0.00158776	0.0162912	TRUE	DOWN	ENSG00000263266.2		ITGB1BP1-202	1.24834	-2.65812	0.797427	-3.33337	0.000857995	0.0174161	TRUE	DOWN	ENST00000355346.9
ITPRID2	3.61183	-1.23272	0.404243	-3.04946	0.00229251	0.0214364	TRUE	DOWN	ENSG00000138434.17		HSPB1-208	0.992875	-2.66635	0.821021	-3.2476	0.00116381	0.0219664	TRUE	DOWN	ENST00000674965.1
CCT6A	18.3617	-1.24979	0.186999	-6.6834	2.33455e-11	1.88247e-09	TRUE	DOWN	ENSG00000146731.11		CALD1-201	1.46658	-2.67532	0.751638	-3.55932	0.000371815	0.00888841	TRUE	DOWN	ENST00000361675.7
ENO1	58.899	-1.25822	0.104269	-12.067	1.578e-33	9.013e-31	TRUE	DOWN	ENSG00000074800.16		KYNU-201	4.48286	-2.68755	0.474706	-5.66151	1.50049e-08	1.31772e-06	TRUE	DOWN	ENST00000264170.9
LIMA1	3.41865	-1.26004	0.410166	-3.07202	0.00212616	0.0202962	TRUE	DOWN	ENSG00000050405.14		MEST-202	0.784464	-2.69639	0.889687	-3.03072	0.00243973	0.0383581	TRUE	DOWN	ENST00000341441.9
COPZ1	4.08312	-1.26198	0.381807	-3.30528	0.000948814	0.0110598	TRUE	DOWN	ENSG00000111481.10		DNAJB4-201	2.16889	-2.6974	0.65826	-4.09777	4.17156e-05	0.00147769	TRUE	DOWN	ENST00000370763.6
MT2A	4.20028	-1.26893	0.383406	-3.30962	0.000934229	0.0109323	TRUE	DOWN	ENSG00000125148.7		EEF1A2-201	2.57811	-2.69964	0.630526	-4.28156	1.85584e-05	0.000772004	TRUE	DOWN	ENST00000217182.6
GCLM	6.07988	-1.27289	0.310624	-4.09785	4.16998e-05	0.000897099	TRUE	DOWN	ENSG00000023909.10		CALD1-202	1.80662	-2.7003	0.706065	-3.82444	0.000131069	0.00377561	TRUE	DOWN	ENST00000361901.6
GAL	6.88922	-1.27481	0.295915	-4.30802	1.6472e-05	0.000427648	TRUE	DOWN	ENSG00000069482.7		CD44-201	1.78301	-2.71579	0.708304	-3.83421	0.000125968	0.00365364	TRUE	DOWN	ENST00000263398.11
ATP5MC2	10.4084	-1.2749	0.237468	-5.36871	7.93026e-08	3.50671e-06	TRUE	DOWN	ENSG00000135390.21		RPS27A-202	1.00035	-2.72098	0.804299	-3.38304	0.000716877	0.0150093	TRUE	DOWN	ENST00000402285.7
PTMS	6.08797	-1.28664	0.314022	-4.09729	4.18013e-05	0.000897099	TRUE	DOWN	ENSG00000159335.18		EPAS1-201	1.50822	-2.72561	0.737491	-3.69579	0.000219208	0.00582375	TRUE	DOWN	ENST00000263734.5
MRPL33	3.7942	-1.30202	0.392621	-3.31623	0.000912404	0.0107635	TRUE	DOWN	ENSG00000243147.8		ASPH-201	2.19987	-2.73309	0.665684	-4.10568	4.03119e-05	0.00144007	TRUE	DOWN	ENST00000356457.9
IPO5	4.54429	-1.30305	0.362515	-3.59446	0.000325062	0.00477824	TRUE	DOWN	ENSG00000065150.21		ENST00000613488	0.811967	-2.76067	0.869233	-3.17598	0.0014933	0.0266351	TRUE	DOWN	ENST00000613488.3
FSCN1	2.97518	-1.31024	0.443482	-2.95444	0.00313233	0.0272795	TRUE	DOWN	ENSG00000075618.18		FTH1-212	4.96038	-2.77888	0.450867	-6.16341	7.11951e-10	7.89766e-08	TRUE	DOWN	ENST00000620041.4
ADK	2.84812	-1.32269	0.467311	-2.83042	0.00464867	0.0357999	TRUE	DOWN	ENSG00000156110.15		TPM2-202	1.38325	-2.79863	0.785249	-3.56401	0.000365235	0.00879764	TRUE	DOWN	ENST00000378292.9
TSPO	2.84414	-1.34309	0.467083	-2.87548	0.00403408	0.0324145	TRUE	DOWN	ENSG00000100300.18		VMP1-216	2.8049	-2.79875	0.621981	-4.49975	6.80344e-06	0.000329641	TRUE	DOWN	ENST00000592790.1
NPM1	118.456	-1.35314	0.0776447	-17.4273	5.12297e-68	3.51128e-64	TRUE	DOWN	ENSG00000181163.14		EFNA1-202	0.619087	-2.80093	0.955299	-2.93199	0.00336793	0.048955	TRUE	DOWN	ENST00000368407.8
HSPA9	10.8413	-1.35342	0.236463	-5.72361	1.04286e-08	5.58421e-07	TRUE	DOWN	ENSG00000113013.16		CALD1-203	2.04037	-2.80622	0.70056	-4.00568	6.18399e-05	0.00197482	TRUE	DOWN	ENST00000393118.7
RMRP	35.3744	-1.35458	0.235334	-5.75597	8.61457e-09	4.68605e-07	TRUE	DOWN	ENSG00000277027.1		CTSC-201	2.00858	-2.81522	0.696525	-4.04181	5.30407e-05	0.00176051	TRUE	DOWN	ENST00000227266.10
POLD2	2.69639	-1.35565	0.470893	-2.87888	0.00399085	0.0322562	TRUE	DOWN	ENSG00000106628.13		NQO1-203	0.833703	-2.82154	0.847091	-3.33086	0.000865787	0.0174765	TRUE	DOWN	ENST00000379047.7
ME1	4.31501	-1.35835	0.368721	-3.68395	0.00022965	0.00362677	TRUE	DOWN	ENSG00000065833.9		DNER-201	0.66785	-2.82958	0.954337	-2.96496	0.00302718	0.0452503	TRUE	DOWN	ENST00000341772.5
YWHAG	4.584	-1.37266	0.379256	-3.61934	0.00029535	0.00443932	TRUE	DOWN	ENSG00000170027.7		VASN-201	0.665137	-2.85744	0.949424	-3.00965	0.00261549	0.0406332	TRUE	DOWN	ENST00000304735.4
PPP1R14B	6.538	-1.37382	0.30125	-4.56038	5.10608e-06	0.000154854	TRUE	DOWN	ENSG00000173457.11		COL7A1-211	1.09149	-2.86699	0.813474	-3.52437	0.000424486	0.00995928	TRUE	DOWN	ENST00000681320.1
PKM	28.5545	-1.37496	0.147128	-9.34535	9.15902e-21	2.98933e-18	TRUE	DOWN	ENSG00000067225.21		GLP2R-201	0.690574	-2.88502	0.90414	-3.1909	0.00141829	0.0255217	TRUE	DOWN	ENST00000262441.10
LAMP1	2.26958	-1.39207	0.505794	-2.75224	0.00591896	0.0427939	TRUE	DOWN	ENSG00000185896.11		LINC01116-201	1.09836	-2.88708	0.791692	-3.64673	0.000265602	0.0068218	TRUE	DOWN	ENST00000295549.9
KRT8	5.2689	-1.39253	0.338138	-4.11822	3.8181e-05	0.000844169	TRUE	DOWN	ENSG00000170421.13		SGK1-201	1.93984	-2.89509	0.695413	-4.16312	3.1393e-05	0.00119577	TRUE	DOWN	ENST00000237305.11
MSN	2.41112	-1.42027	0.493177	-2.87984	0.0039788	0.0321968	TRUE	DOWN	ENSG00000147065.18		HSPD1-218	1.14582	-2.89549	0.808334	-3.58205	0.000340914	0.00830673	TRUE	DOWN	ENST00000677913.1
SAR1B	4.05343	-1.43564	0.402161	-3.56982	0.000357226	0.00515773	TRUE	DOWN	ENSG00000152700.14		TRIM16L-204	0.701022	-2.9095	0.97549	-2.9826	0.00285809	0.0434415	TRUE	DOWN	ENST00000449552.6
GNB2	3.36096	-1.43902	0.434419	-3.31251	0.000924638	0.0108891	TRUE	DOWN	ENSG00000172354.10		FOS-201	0.943355	-2.91206	0.849327	-3.42866	0.000606563	0.0133045	TRUE	DOWN	ENST00000303562.9
DPM1	5.19851	-1.45265	0.342777	-4.2379	2.25624e-05	0.000544518	TRUE	DOWN	ENSG00000000419.14		CASC19-284	0.905615	-2.92607	0.856053	-3.4181	0.000630603	0.0137021	TRUE	DOWN	ENST00000642142.1
DNAJC2	3.70977	-1.45539	0.407056	-3.5754	0.000349689	0.00506716	TRUE	DOWN	ENSG00000105821.15		NYAP2-201	0.691739	-2.93323	0.932363	-3.14601	0.00165512	0.0287509	TRUE	DOWN	ENST00000272907.8
TOB1	2.40066	-1.46862	0.499221	-2.94182	0.00326294	0.028202	TRUE	DOWN	ENSG00000141232.5		COL12A1-201	0.896817	-2.93474	0.859079	-3.41615	0.000635136	0.0137769	TRUE	DOWN	ENST00000322507.13
ATP5MC1	7.70006	-1.47401	0.280828	-5.24879	1.53101e-07	6.3214e-06	TRUE	DOWN	ENSG00000159199.14		L1CAM-202	1.19721	-2.94781	0.795957	-3.70348	0.000212658	0.00572186	TRUE	DOWN	ENST00000361981.7
GSTP1	11.5784	-1.48608	0.230337	-6.45177	1.10548e-10	8.14725e-09	TRUE	DOWN	ENSG00000084207.18		PLEKHA2-207	0.692539	-2.94808	0.970063	-3.03906	0.00237315	0.0376076	TRUE	DOWN	ENST00000616834.1
BZW1	3.51434	-1.48824	0.429911	-3.46175	0.000536683	0.0070776	TRUE	DOWN	ENSG00000082153.18		EIF2S1-202	0.7062	-2.95292	0.922795	-3.19998	0.00137439	0.0249004	TRUE	DOWN	ENST00000466499.6
BRI3	2.78915	-1.48946	0.47325	-3.14731	0.0016478	0.0167816	TRUE	DOWN	ENSG00000164713.10		G6PD-202	0.92195	-2.95443	0.851253	-3.47069	0.00051913	0.0116606	TRUE	DOWN	ENST00000393562.10
TAF13	2.58598	-1.49104	0.488488	-3.05235	0.00227054	0.0213182	TRUE	DOWN	ENSG00000197780.11		FTH1-202	0.922961	-2.95571	0.835218	-3.53885	0.000401875	0.00949927	TRUE	DOWN	ENST00000526640.5
TM2D2	2.23286	-1.52166	0.529075	-2.87607	0.00402659	0.0323923	TRUE	DOWN	ENSG00000169490.17		HSPD1-205	1.39179	-2.95733	0.757666	-3.90321	9.49233e-05	0.0028581	TRUE	DOWN	ENST00000428204.6
MYO10	2.06599	-1.53276	0.554415	-2.76464	0.00569853	0.0415811	TRUE	DOWN	ENSG00000145555.15		OLFM1-208	0.709869	-2.96133	0.968848	-3.05655	0.00223899	0.0362623	TRUE	DOWN	ENST00000392991.8
RPL22L1	13.717	-1.54335	0.221276	-6.97477	3.06366e-12	2.79978e-10	TRUE	DOWN	ENSG00000163584.18		IL11-201	0.727841	-2.96602	0.915327	-3.2404	0.00119363	0.0222964	TRUE	DOWN	ENST00000264563.7
SEPTIN9	2.36644	-1.5457	0.55911	-2.76457	0.00569985	0.0415811	TRUE	DOWN	ENSG00000184640.20		SEMA3A-201	0.933302	-2.97889	0.821379	-3.62669	0.00028708	0.00723191	TRUE	DOWN	ENST00000265362.9
MTRR	2.3719	-1.55251	0.510176	-3.04308	0.00234171	0.0217776	TRUE	DOWN	ENSG00000124275.15		NNMT-201	0.742967	-2.9827	0.905877	-3.29261	0.000992607	0.0194311	TRUE	DOWN	ENST00000299964.4
HSD17B10	3.34784	-1.56839	0.43106	-3.63844	0.000274296	0.00417784	TRUE	DOWN	ENSG00000072506.14		PLPP2-203	0.950787	-2.99743	0.846967	-3.53902	0.000401619	0.00949927	TRUE	DOWN	ENST00000434325.7
GHITM	5.57259	-1.57133	0.335404	-4.68489	2.80115e-06	9.23032e-05	TRUE	DOWN	ENSG00000165678.22		IMPA2-201	0.729167	-3.00326	0.914386	-3.28445	0.00102181	0.0199104	TRUE	DOWN	ENST00000269159.8
AKR1B1	4.43688	-1.5723	0.377966	-4.15988	3.18414e-05	0.000732352	TRUE	DOWN	ENSG00000085662.14		FTH1-201	56.5949	-3.01816	0.144351	-20.9085	4.47897e-97	5.66411e-93	TRUE	DOWN	ENST00000273550.12
EIF2S1	4.81508	-1.59029	0.360113	-4.41608	1.00509e-05	0.000276661	TRUE	DOWN	ENSG00000134001.15		RASA3-201	0.708705	-3.02557	0.910141	-3.32428	0.000886463	0.017794	TRUE	DOWN	ENST00000334062.8
SQSTM1	2.08511	-1.61316	0.548617	-2.94042	0.00327769	0.0282261	TRUE	DOWN	ENSG00000161011.20		NPR3-202	0.789298	-3.03263	0.890079	-3.40715	0.000656454	0.0141612	TRUE	DOWN	ENST00000326958.5
TARS1	7.51583	-1.63741	0.288718	-5.67131	1.41711e-08	7.41441e-07	TRUE	DOWN	ENSG00000113407.14		TUBA4A-202	0.744551	-3.0342	0.891206	-3.4046	0.00066262	0.0142469	TRUE	DOWN	ENST00000392088.6
PDLIM7	2.38171	-1.64387	0.521168	-3.15421	0.00160934	0.0164633	TRUE	DOWN	ENSG00000196923.14		DDIT4-201	2.15821	-3.0394	0.694962	-4.37348	1.22282e-05	0.000544499	TRUE	DOWN	ENST00000307365.4
LITAF	2.53267	-1.65896	0.506061	-3.27818	0.00104479	0.0118806	TRUE	DOWN	ENSG00000189067.14		CPS1-214	1.94023	-3.0472	0.716742	-4.25146	2.12385e-05	0.000860838	TRUE	DOWN	ENST00000673711.1
PDHA1	3.93178	-1.67871	0.407849	-4.116	3.85497e-05	0.000846859	TRUE	DOWN	ENSG00000131828.14		NEXN-201	0.996491	-3.04997	0.827332	-3.68651	0.000227354	0.00600234	TRUE	DOWN	ENST00000330010.12
SLC3A2	7.00147	-1.68051	0.302019	-5.56425	2.63284e-08	1.28896e-06	TRUE	DOWN	ENSG00000168003.19		HSPB1-201	7.14428	-3.0552	0.400234	-7.63355	2.28372e-14	5.06666e-12	TRUE	DOWN	ENST00000248553.7
ITGB1BP1	2.19344	-1.68218	0.545123	-3.08588	0.00202951	0.0196473	TRUE	DOWN	ENSG00000119185.13		CD55-204	4.01919	-3.06027	0.535214	-5.71785	1.07881e-08	9.67559e-07	TRUE	DOWN	ENST00000367064.9
GSR	3.77594	-1.69144	0.415927	-4.06668	4.76884e-05	0.00100882	TRUE	DOWN	ENSG00000104687.14		AVPI1-201	1.21129	-3.06291	0.778941	-3.93215	8.41901e-05	0.00255019	TRUE	DOWN	ENST00000370626.4
PVT1	2.91204	-1.69773	0.478026	-3.55155	0.000382968	0.00544577	TRUE	DOWN	ENSG00000249859.14		C4BPB-203	0.786843	-3.07672	0.880672	-3.49361	0.000476543	0.0109371	TRUE	DOWN	ENST00000367078.8
TCF12	4.49002	-1.7202	0.388694	-4.42559	9.61778e-06	0.000267968	TRUE	DOWN	ENSG00000140262.18		AQP3-201	1.02552	-3.12088	0.821458	-3.7992	0.000145165	0.00409766	TRUE	DOWN	ENST00000297991.6
MRPS30	3.43356	-1.72138	0.442496	-3.89017	0.000100176	0.0018967	TRUE	DOWN	ENSG00000112996.11		NPTX1-201	0.819542	-3.13554	0.89019	-3.52233	0.000427772	0.00999927	TRUE	DOWN	ENST00000306773.5
HSPD1	62.4655	-1.7249	0.108423	-15.909	5.48688e-57	1.25357e-53	TRUE	DOWN	ENSG00000144381.18		DUSP2-201	0.795786	-3.14811	0.872566	-3.60787	0.000308718	0.00762702	TRUE	DOWN	ENST00000288943.5
MET	1.8216	-1.72615	0.596399	-2.89428	0.00380031	0.0311199	TRUE	DOWN	ENSG00000105976.16		SIK1-201	0.830137	-3.15648	0.853287	-3.69921	0.000216276	0.00578229	TRUE	DOWN	ENST00000270162.8
TKT	12.7535	-1.73178	0.226914	-7.6319	2.3131e-14	2.93593e-12	TRUE	DOWN	ENSG00000163931.17		GSTM3-202	1.3492	-3.15985	0.768303	-4.11276	3.90963e-05	0.00141665	TRUE	DOWN	ENST00000361066.7
HTATIP2	2.07907	-1.73644	0.557911	-3.11239	0.00185579	0.0184075	TRUE	DOWN	ENSG00000109854.14		CYTOR-201	0.844537	-3.16219	0.859932	-3.67726	0.000235754	0.00619823	TRUE	DOWN	ENST00000331944.10
EIF4B	3.39004	-1.73986	0.465133	-3.74056	0.000183609	0.00303243	TRUE	DOWN	ENSG00000063046.18		DNAJC15-201	1.22556	-3.16425	0.78009	-4.05626	4.9864e-05	0.00169511	TRUE	DOWN	ENST00000379221.4
TFRC	7.91954	-1.74407	0.293456	-5.94319	2.7952e-09	1.62358e-07	TRUE	DOWN	ENSG00000072274.14		TRIM16-211	0.840432	-3.16434	0.896	-3.53163	0.000413004	0.00970789	TRUE	DOWN	ENST00000577886.5
CDK6	3.70091	-1.74471	0.447377	-3.89985	9.62508e-05	0.00183251	TRUE	DOWN	ENSG00000105810.10		EMP3-201	2.44298	-3.17956	0.685682	-4.63708	3.5337e-06	0.000184658	TRUE	DOWN	ENST00000270221.11
CUL4A	2.87915	-1.75661	0.506234	-3.46995	0.000520553	0.0069279	TRUE	DOWN	ENSG00000139842.15		ENST00000691872	1.08451	-3.19114	0.790082	-4.039	5.36802e-05	0.00177707	TRUE	DOWN	ENST00000691872.1
LDLR	1.72795	-1.76585	0.61439	-2.87415	0.00405113	0.0324572	TRUE	DOWN	ENSG00000130164.14		EPGN-202	0.834922	-3.19638	0.881907	-3.6244	0.000289637	0.00728181	TRUE	DOWN	ENST00000413830.6
LMNA	10.8077	-1.7675	0.263482	-6.70824	1.96983e-11	1.62665e-09	TRUE	DOWN	ENSG00000160789.24		PIR-201	1.68402	-3.19998	0.74035	-4.32225	1.54446e-05	0.000662076	TRUE	DOWN	ENST00000380420.10
SMAD2	2.14332	-1.77833	0.56747	-3.13379	0.00172564	0.0173963	TRUE	DOWN	ENSG00000175387.16		ZFAS1-202	1.72052	-3.22126	0.730529	-4.40949	1.03614e-05	0.000471333	TRUE	DOWN	ENST00000371743.8
CREM	2.5218	-1.78986	0.516315	-3.46659	0.000527095	0.00698784	TRUE	DOWN	ENSG00000095794.21		GSTM4-203	1.15904	-3.2404	0.795744	-4.07216	4.65785e-05	0.00162102	TRUE	DOWN	ENST00000369836.9
DSTN	13.3109	-1.79171	0.225525	-7.94462	1.94787e-15	3.03426e-13	TRUE	DOWN	ENSG00000125868.16		PLAC8-201	1.10156	-3.24328	0.799382	-4.05724	4.9657e-05	0.00169511	TRUE	DOWN	ENST00000311507.9
COX7B	2.48847	-1.80362	0.51823	-3.48035	0.000500761	0.00672984	TRUE	DOWN	ENSG00000131174.7		ITPR1-203	0.902358	-3.24423	0.833309	-3.8932	9.89324e-05	0.00295437	TRUE	DOWN	ENST00000357086.10
TIMP1	6.24206	-1.82459	0.327167	-5.57694	2.4478e-08	1.21574e-06	TRUE	DOWN	ENSG00000102265.12		CYP1B1-205	1.41606	-3.24546	0.752726	-4.3116	1.62074e-05	0.000688753	TRUE	DOWN	ENST00000610745.5
HMGA1	5.85097	-1.82856	0.338748	-5.39801	6.73845e-08	2.99905e-06	TRUE	DOWN	ENSG00000137309.21		COL7A1-201	1.11984	-3.24566	0.78627	-4.12793	3.66051e-05	0.00134176	TRUE	DOWN	ENST00000328333.12
TSC22D1	3.34553	-1.83081	0.452043	-4.05007	5.12017e-05	0.00105704	TRUE	DOWN	ENSG00000102804.15		S100A16-204	0.865191	-3.251	0.879238	-3.69752	0.000217717	0.00579632	TRUE	DOWN	ENST00000368706.9
HSPA8	27.3961	-1.83201	0.160835	-11.3906	4.65642e-30	2.12767e-27	TRUE	DOWN	ENSG00000109971.14		CASC19-201	3.02161	-3.2606	0.63509	-5.13407	2.83535e-07	1.93816e-05	TRUE	DOWN	ENST00000500112.2
UCHL5	3.29637	-1.86877	0.4629	-4.03708	5.41199e-05	0.00111393	TRUE	DOWN	ENSG00000116750.14		CPT1A-201	2.63301	-3.27126	0.68094	-4.80404	1.55498e-06	8.85775e-05	TRUE	DOWN	ENST00000265641.10
PBK	5.99085	-1.88588	0.33795	-5.58036	2.40016e-08	1.20078e-06	TRUE	DOWN	ENSG00000168078.10		ASS1-204	1.76738	-3.28328	0.738343	-4.44682	8.71517e-06	0.00040971	TRUE	DOWN	ENST00000372394.5
SMOC1	1.69157	-1.92592	0.6545	-2.94258	0.00325486	0.0281677	TRUE	DOWN	ENSG00000198732.11		OLFM1-202	1.47147	-3.29371	0.770872	-4.27271	1.93111e-05	0.000795466	TRUE	DOWN	ENST00000277415.15
TMEM14C	11.7007	-1.94197	0.250379	-7.75613	8.75594e-15	1.17673e-12	TRUE	DOWN	ENSG00000111843.14		C19orf33-201	0.922631	-3.30763	0.872075	-3.79283	0.000148942	0.00418561	TRUE	DOWN	ENST00000301246.10
PMEPA1	1.38778	-1.96246	0.709899	-2.76443	0.00570227	0.0415811	TRUE	DOWN	ENSG00000124225.16		TPM2-201	1.17239	-3.31114	0.789646	-4.19319	2.75056e-05	0.00106698	TRUE	DOWN	ENST00000329305.6
CSRP1	2.04103	-1.98423	0.58845	-3.37196	0.000746342	0.00914411	TRUE	DOWN	ENSG00000159176.14		CCND3-203	1.41938	-3.32463	0.746653	-4.45271	8.47921e-06	0.000400105	TRUE	DOWN	ENST00000372991.9
GALNT2	1.92515	-1.98533	0.620824	-3.1979	0.00138433	0.0146876	TRUE	DOWN	ENSG00000143641.10		FOXC2-201	0.906557	-3.32836	0.868056	-3.83426	0.000125942	0.00365364	TRUE	DOWN	ENST00000649859.1
TGFB1	1.67386	-1.98904	0.663247	-2.99894	0.00270922	0.0243688	TRUE	DOWN	ENSG00000105329.11		NQO1-202	1.21445	-3.33502	0.778115	-4.28603	1.81896e-05	0.000761675	TRUE	DOWN	ENST00000379046.6
TMSB10	2.45321	-2.00689	0.558462	-3.5936	0.000326137	0.00477824	TRUE	DOWN	ENSG00000034510.6		MAGEA12-201	1.14591	-3.3413	0.787247	-4.24428	2.19294e-05	0.000883184	TRUE	DOWN	ENST00000357916.8
BACE2	5.49169	-2.01817	0.363537	-5.55147	2.83272e-08	1.36729e-06	TRUE	DOWN	ENSG00000182240.16		PSPH-210	1.49945	-3.34225	0.743738	-4.49386	6.99449e-06	0.000336321	TRUE	DOWN	ENST00000437355.6
PGK1	18.0563	-2.01831	0.202631	-9.96054	2.2682e-23	8.18225e-21	TRUE	DOWN	ENSG00000102144.15		VMP1-205	1.17038	-3.35099	0.777259	-4.31129	1.62303e-05	0.000688753	TRUE	DOWN	ENST00000587470.1
PAK1IP1	2.75576	-2.04761	0.522238	-3.92084	8.82394e-05	0.00173293	TRUE	DOWN	ENSG00000111845.5		MAGEA3-201	0.94351	-3.35692	0.834536	-4.02249	5.75852e-05	0.00186246	TRUE	DOWN	ENST00000370278.4
LAMB1	1.49638	-2.05865	0.717712	-2.86836	0.00412612	0.0328729	TRUE	DOWN	ENSG00000091136.15		MIR4435-2HG-203	1.88942	-3.36811	0.72736	-4.6306	3.64614e-06	0.000189749	TRUE	DOWN	ENST00000409569.2
PXDN	1.78336	-2.06262	0.661627	-3.1175	0.0018239	0.0181966	TRUE	DOWN	ENSG00000130508.11		CD24-204	2.71698	-3.37486	0.673881	-5.0081	5.49692e-07	3.54664e-05	TRUE	DOWN	ENST00000619133.4
CD44	1.25713	-2.06714	0.761437	-2.71479	0.00663187	0.0465726	TRUE	DOWN	ENSG00000026508.21		KCNJ12-202	1.19987	-3.37755	0.776985	-4.347	1.38013e-05	0.000599765	TRUE	DOWN	ENST00000583088.6
AP1S3	1.25456	-2.08026	0.756366	-2.75033	0.00595345	0.0429978	TRUE	DOWN	ENSG00000152056.18		FSTL4-201	0.976564	-3.37928	0.817058	-4.13592	3.53542e-05	0.00131111	TRUE	DOWN	ENST00000265342.12
VMP1	8.25705	-2.09223	0.298751	-7.00325	2.50088e-12	2.31636e-10	TRUE	DOWN	ENSG00000062716.13		SFN-201	0.992772	-3.38129	0.818315	-4.13201	3.59597e-05	0.00132864	TRUE	DOWN	ENST00000339276.6
SLC38A1	11.615	-2.10858	0.253822	-8.30733	9.7882e-17	1.86357e-14	TRUE	DOWN	ENSG00000111371.16		TCF12-203	0.96805	-3.39495	0.837614	-4.05312	5.05395e-05	0.00171128	TRUE	DOWN	ENST00000343827.7
MYC	2.66981	-2.13433	0.563948	-3.78462	0.000153941	0.00268311	TRUE	DOWN	ENSG00000136997.22		MYOF-202	0.962082	-3.40582	0.840563	-4.05184	5.08173e-05	0.00171128	TRUE	DOWN	ENST00000359263.9
COL12A1	1.61614	-2.15821	0.700126	-3.0826	0.00205201	0.0197812	TRUE	DOWN	ENSG00000111799.22		TROAP-202	0.973613	-3.41134	0.804809	-4.2387	2.24817e-05	0.000902551	TRUE	DOWN	ENST00000380327.9
LGALS3BP	2.70357	-2.16038	0.558229	-3.87007	0.000108804	0.00203199	TRUE	DOWN	ENSG00000108679.13		PRSS21-201	1.23861	-3.42202	0.770915	-4.43891	9.04171e-06	0.000421837	TRUE	DOWN	ENST00000005995.8
KLHL13	1.25209	-2.17444	0.75497	-2.88017	0.00397467	0.0321968	TRUE	DOWN	ENSG00000003096.15		TMSB4X-202	3.58128	-3.42342	0.628523	-5.44677	5.12914e-08	4.13141e-06	TRUE	DOWN	ENST00000380635.5
ENSG00000275216	1.59462	-2.17885	0.707301	-3.08052	0.00206642	0.0198643	TRUE	DOWN	ENSG00000275216.2		SERPINB5-201	1.27844	-3.44265	0.769846	-4.47187	7.754e-06	0.000370027	TRUE	DOWN	ENST00000382771.9
CAVIN1	2.01923	-2.17904	0.648073	-3.36234	0.000772851	0.00942548	TRUE	DOWN	ENSG00000177469.13		CPS1-203	1.94894	-3.44788	0.726887	-4.74334	2.10219e-06	0.000116598	TRUE	DOWN	ENST00000451903.3
MBD2	2.27664	-2.17948	0.594763	-3.66446	0.000247865	0.00385231	TRUE	DOWN	ENSG00000134046.12		PCOLCE-201	1.57806	-3.4486	0.752758	-4.58128	4.62135e-06	0.000234705	TRUE	DOWN	ENST00000223061.6
SREBF1	1.57821	-2.18407	0.692136	-3.15556	0.00160191	0.0164118	TRUE	DOWN	ENSG00000072310.18		EEF1A2-208	1.65381	-3.4506	0.740422	-4.66031	3.15739e-06	0.000166368	TRUE	DOWN	ENST00000675519.1
HSPB8	1.16348	-2.18548	0.780153	-2.80134	0.00508902	0.0383177	TRUE	DOWN	ENSG00000152137.8		DIO2-201	0.979004	-3.45233	0.823283	-4.19336	2.74847e-05	0.00106698	TRUE	DOWN	ENST00000438257.9
SLC7A2	1.57168	-2.18838	0.69247	-3.16026	0.00157628	0.0162192	TRUE	DOWN	ENSG00000003989.18		COL5A1-201	2.00344	-3.4714	0.719657	-4.82368	1.4093e-06	8.13791e-05	TRUE	DOWN	ENST00000371817.8
LINC00958	3.28811	-2.19281	0.487563	-4.49748	6.87636e-06	0.000201413	TRUE	DOWN	ENSG00000251381.8		PDE10A-240	1.29004	-3.47934	0.78947	-4.40718	1.04723e-05	0.000472974	TRUE	DOWN	ENST00000693627.1
SGK1	4.13257	-2.19307	0.425836	-5.15003	2.60442e-07	1.06254e-05	TRUE	DOWN	ENSG00000118515.12		VWA5A-201	1.03106	-3.48579	0.844409	-4.12808	3.65798e-05	0.00134176	TRUE	DOWN	ENST00000361352.9
NQO2	1.38316	-2.20046	0.74439	-2.95606	0.00311598	0.027241	TRUE	DOWN	ENSG00000124588.22		PPDPFL-204	1.02822	-3.48685	0.824141	-4.23089	2.32771e-05	0.000925669	TRUE	DOWN	ENST00000522267.6
OSMR	1.07745	-2.20907	0.787759	-2.80424	0.00504347	0.0382389	TRUE	DOWN	ENSG00000145623.13		TXNRD1-210	2.95057	-3.48689	0.668621	-5.21504	1.83776e-07	1.34444e-05	TRUE	DOWN	ENST00000526691.5
S100A11	13.9078	-2.21092	0.245448	-9.0077	2.10425e-19	5.34169e-17	TRUE	DOWN	ENSG00000163191.6		PPDPFL-202	1.12023	-3.50469	0.819893	-4.27458	1.91502e-05	0.000791417	TRUE	DOWN	ENST00000399653.8
OGDH	2.34366	-2.21102	0.588954	-3.75415	0.000173933	0.00291477	TRUE	DOWN	ENSG00000105953.16		TMSB4X-204	29.8605	-3.50698	0.2214	-15.8401	1.64654e-56	1.04111e-52	TRUE	DOWN	ENST00000451311.7
C11orf24	1.10885	-2.21845	0.805127	-2.7554	0.00586199	0.0425165	TRUE	DOWN	ENSG00000171067.11		IGFBP7-201	1.67029	-3.51584	0.732463	-4.80002	1.5865e-06	8.99683e-05	TRUE	DOWN	ENST00000295666.6
COTL1	3.30341	-2.22505	0.491063	-4.53109	5.86803e-06	0.000175631	TRUE	DOWN	ENSG00000103187.8		PLA2G4A-201	4.91518	-3.56354	0.551873	-6.45717	1.06676e-10	1.33567e-08	TRUE	DOWN	ENST00000367466.4
KLF5	1.60328	-2.22907	0.720703	-3.09291	0.00198206	0.0193795	TRUE	DOWN	ENSG00000102554.14		ASS1-203	2.16817	-3.56421	0.716645	-4.97347	6.57657e-07	4.17926e-05	TRUE	DOWN	ENST00000372393.7
MT-TP	6.37975	-2.24519	0.355683	-6.31234	2.7485e-10	1.94208e-08	TRUE	DOWN	ENSG00000210196.2		MYL9-201	1.11192	-3.59644	0.813576	-4.42053	9.84604e-06	0.000454128	TRUE	DOWN	ENST00000279022.7
AHCTF1	1.1437	-2.25397	0.806128	-2.79605	0.00517321	0.0387087	TRUE	DOWN	ENSG00000153207.16		PRSS23-201	7.65341	-3.63211	0.447298	-8.1201	4.65793e-16	1.40248e-13	TRUE	DOWN	ENST00000280258.6
ASPH	5.36582	-2.25937	0.379301	-5.95667	2.57433e-09	1.54776e-07	TRUE	DOWN	ENSG00000198363.18		SLC7A5-201	6.48524	-3.63555	0.489836	-7.42198	1.15385e-13	2.43193e-11	TRUE	DOWN	ENST00000261622.5
PPP2R1B	1.17155	-2.26674	0.788625	-2.8743	0.00404926	0.0324572	TRUE	DOWN	ENSG00000137713.16		ELFN1-AS1-202	1.20364	-3.67238	0.779846	-4.70911	2.48798e-06	0.000135034	TRUE	DOWN	ENST00000453348.1
PCID2	1.35	-2.27235	0.751258	-3.02473	0.00248857	0.0228948	TRUE	DOWN	ENSG00000126226.22		SLC7A11-201	3.97608	-3.67256	0.624114	-5.88443	3.99419e-09	3.82656e-07	TRUE	DOWN	ENST00000280612.9
MCF2L	1.41372	-2.28205	0.744549	-3.06502	0.00217657	0.0206053	TRUE	DOWN	ENSG00000126217.22		TCIM-201	2.77855	-3.68849	0.686486	-5.373	7.74382e-08	5.97124e-06	TRUE	DOWN	ENST00000315792.5
ADAM9	5.8626	-2.28678	0.384368	-5.94945	2.69038e-09	1.59711e-07	TRUE	DOWN	ENSG00000168615.13		GNG11-201	2.85404	-3.70406	0.683294	-5.42088	5.93066e-08	4.68744e-06	TRUE	DOWN	ENST00000248564.6
FTL	44.6874	-2.29973	0.148506	-15.4857	4.33177e-54	5.93798e-51	TRUE	DOWN	ENSG00000087086.15		BASP1-203	3.58666	-3.72167	0.662921	-5.61405	1.9764e-08	1.71637e-06	TRUE	DOWN	ENST00000616743.1
CTSC	5.57216	-2.3004	0.382843	-6.00874	1.86969e-09	1.15449e-07	TRUE	DOWN	ENSG00000109861.17		SLC7A5-203	4.14657	-3.73004	0.622154	-5.99536	2.03029e-09	2.05401e-07	TRUE	DOWN	ENST00000565644.5
PRELID3B	1.96315	-2.30344	0.655437	-3.51435	0.000440826	0.00611212	TRUE	DOWN	ENSG00000101166.16		TGFBI-201	1.90121	-3.73399	0.722193	-5.17036	2.33646e-07	1.66932e-05	TRUE	DOWN	ENST00000442011.7
TRABD2A	1.0827	-2.30477	0.80359	-2.8681	0.0041295	0.0328729	TRUE	DOWN	ENSG00000186854.11		CPS1-202	1.57335	-3.74138	0.757326	-4.94025	7.80216e-07	4.86886e-05	TRUE	DOWN	ENST00000430249.7
HOXC10	1.39251	-2.3144	0.764185	-3.02859	0.00245697	0.0226345	TRUE	DOWN	ENSG00000180818.5		COL3A1-201	2.87296	-3.74716	0.681454	-5.49877	3.82452e-08	3.1819e-06	TRUE	DOWN	ENST00000304636.9
COL4A1	1.44105	-2.32025	0.736809	-3.14906	0.00163798	0.0167313	TRUE	DOWN	ENSG00000187498.16		FTH1-208	2.00319	-3.7474	0.721987	-5.19039	2.09852e-07	1.51645e-05	TRUE	DOWN	ENST00000532829.5
TMSB4XP8	0.944451	-2.32812	0.822912	-2.82913	0.00466746	0.0358641	TRUE	DOWN	ENSG00000187653.11		LGALS1-201	14.1278	-3.77315	0.34549	-10.9211	9.13473e-28	7.21987e-25	TRUE	DOWN	ENST00000215909.10
TXNRD1	9.78114	-2.34124	0.287586	-8.14101	3.91989e-16	6.39688e-14	TRUE	DOWN	ENSG00000198431.18		CPS1-215	1.28417	-3.77694	0.76291	-4.9507	7.3946e-07	4.65235e-05	TRUE	DOWN	ENST00000674074.1
ANXA6	1.73021	-2.35618	0.680781	-3.46099	0.000538185	0.00708008	TRUE	DOWN	ENSG00000197043.15		NPR3-201	1.30997	-3.85065	0.763014	-5.04663	4.49682e-07	2.94646e-05	TRUE	DOWN	ENST00000265074.13
PRDX5	3.47249	-2.36313	0.498686	-4.73871	2.15082e-06	7.4831e-05	TRUE	DOWN	ENSG00000126432.14		SLC9A3R1-201	2.16326	-3.90634	0.71595	-5.45616	4.8653e-08	3.94401e-06	TRUE	DOWN	ENST00000262613.10
ID1	3.24877	-2.37148	0.511067	-4.64025	3.47981e-06	0.000109911	TRUE	DOWN	ENSG00000125968.9		SLPI-201	2.16372	-3.92975	0.712218	-5.51762	3.4362e-08	2.87776e-06	TRUE	DOWN	ENST00000338380.2
CAV1	1.46506	-2.37354	0.742104	-3.19839	0.00138195	0.0146876	TRUE	DOWN	ENSG00000105974.13		ADARB2-203	1.42223	-3.95413	0.75707	-5.22293	1.7611e-07	1.30239e-05	TRUE	DOWN	ENST00000381312.6
EGFR	1.49956	-2.40374	0.724389	-3.3183	0.000905672	0.0107025	TRUE	DOWN	ENSG00000146648.21		GLIPR1-201	2.808	-3.95497	0.704534	-5.6136	1.98158e-08	1.71637e-06	TRUE	DOWN	ENST00000266659.8
TMTC1	0.824196	-2.42536	0.883125	-2.74634	0.00602643	0.0433778	TRUE	DOWN	ENSG00000133687.16		LPL-207	2.82417	-3.98043	0.701611	-5.67327	1.401e-08	1.24768e-06	TRUE	DOWN	ENST00000650287.1
MCTP1	1.47892	-2.45037	0.731682	-3.34895	0.000811187	0.00978851	TRUE	DOWN	ENSG00000175471.20		TUBA4A-201	1.40242	-3.99229	0.755353	-5.28533	1.25476e-07	9.3892e-06	TRUE	DOWN	ENST00000248437.9
COX6A1P2	0.871324	-2.45439	0.876227	-2.80109	0.005093	0.0383177	TRUE	DOWN	ENSG00000226976.3		MAGEA6-201	1.38336	-3.99296	0.77175	-5.1739	2.29255e-07	1.64725e-05	TRUE	DOWN	ENST00000329342.10
LAMA5	1.26027	-2.45795	0.783514	-3.13709	0.00170635	0.0172752	TRUE	DOWN	ENSG00000130702.15		TRIM16L-215	1.8346	-3.9972	0.729013	-5.48302	4.18117e-08	3.45589e-06	TRUE	DOWN	ENST00000641936.1
BTBD3	0.824251	-2.4607	0.877869	-2.80304	0.00506232	0.0382971	TRUE	DOWN	ENSG00000132640.15		DIO2-209	1.42847	-4.01222	0.769377	-5.21489	1.83923e-07	1.34444e-05	TRUE	DOWN	ENST00000557010.5
EMP3	3.31966	-2.47459	0.510663	-4.84584	1.26079e-06	4.64594e-05	TRUE	DOWN	ENSG00000142227.11		PSMD5-201	1.63601	-4.11748	0.743801	-5.53573	3.09943e-08	2.63057e-06	TRUE	DOWN	ENST00000210313.8
GTF2IRD1	1.03048	-2.48626	0.80295	-3.09641	0.00195881	0.019207	TRUE	DOWN	ENSG00000006704.11		OLFM1-204	2.54104	-4.13922	0.701464	-5.90083	3.6168e-09	3.51831e-07	TRUE	DOWN	ENST00000371793.8
PLEKHA2	1.03305	-2.51158	0.830683	-3.02351	0.00249857	0.0229253	TRUE	DOWN	ENSG00000169499.15		ALPL-204	1.71532	-4.14473	0.747523	-5.54462	2.94585e-08	2.51711e-06	TRUE	DOWN	ENST00000374840.8
MCAM	2.72994	-2.5144	0.560168	-4.48865	7.16753e-06	0.000207284	TRUE	DOWN	ENSG00000076706.17		PDE3A-201	3.13776	-4.16396	0.691505	-6.0216	1.72706e-09	1.79019e-07	TRUE	DOWN	ENST00000359062.4
PRTFDC1	1.27713	-2.51653	0.774519	-3.24916	0.00115747	0.012837	TRUE	DOWN	ENSG00000099256.19		EFEMP1-201	2.85151	-4.31758	0.698639	-6.17998	6.41099e-10	7.2387e-08	TRUE	DOWN	ENST00000355426.8
SERPINB1	1.10085	-2.54356	0.827633	-3.07329	0.00211712	0.020268	TRUE	DOWN	ENSG00000021355.13		BST2-201	4.42411	-4.35402	0.668031	-6.51769	7.13996e-11	9.1204e-09	TRUE	DOWN	ENST00000252593.7
CCDC85B	0.874336	-2.55505	0.842236	-3.03366	0.0024161	0.0223481	TRUE	DOWN	ENSG00000175602.4		KRT17-201	6.2589	-4.38522	0.610398	-7.1842	6.76031e-13	1.25722e-10	TRUE	DOWN	ENST00000311208.13
SNHG19	2.87932	-2.5579	0.560439	-4.56409	5.01655e-06	0.000152815	TRUE	DOWN	ENSG00000260260.3		TMSB4X-203	1.93158	-4.4025	0.722375	-6.09448	1.09791e-09	1.15701e-07	TRUE	DOWN	ENST00000380636.1
RNF212	0.712511	-2.6032	0.923202	-2.81975	0.00480605	0.0367642	TRUE	DOWN	ENSG00000178222.14		PLEKHA2-209	2.16014	-4.54333	0.716136	-6.34423	2.23535e-10	2.77139e-08	TRUE	DOWN	ENST00000617275.5
TFB2M	2.2571	-2.61961	0.630189	-4.15686	3.22647e-05	0.000739605	TRUE	DOWN	ENSG00000162851.8		EFEMP1-202	3.34082	-4.54884	0.689805	-6.59439	4.27008e-11	5.56695e-09	TRUE	DOWN	ENST00000394555.6
TNFRSF12A	2.9622	-2.62426	0.55012	-4.77035	1.83911e-06	6.43124e-05	TRUE	DOWN	ENSG00000006327.14		AKR1C3-201	6.98837	-4.55037	0.606305	-7.50509	6.13851e-14	1.31572e-11	TRUE	DOWN	ENST00000380554.5
HTRA1	1.13303	-2.65486	0.834877	-3.17994	0.00147305	0.0154851	TRUE	DOWN	ENSG00000166033.13		CPS1-201	8.89383	-4.6388	0.566066	-8.19481	2.50991e-16	7.93507e-14	TRUE	DOWN	ENST00000233072.10
NFE2L2	1.70356	-2.65781	0.713259	-3.72629	0.000194315	0.00315601	TRUE	DOWN	ENSG00000116044.17		S100A6-201	19.0138	-4.6541	0.387624	-12.0068	3.27462e-33	3.76462e-30	TRUE	DOWN	ENST00000368719.9
IMPA2	1.15909	-2.67227	0.778733	-3.43157	0.000600104	0.00775548	TRUE	DOWN	ENSG00000141401.12		BASP1-201	9.27127	-4.69531	0.566814	-8.28369	1.19419e-16	4.19494e-14	TRUE	DOWN	ENST00000322611.4
CD55	7.60995	-2.67663	0.353965	-7.56185	3.97379e-14	4.61633e-12	TRUE	DOWN	ENSG00000196352.18		CD24-201	2.9435	-4.70301	0.696343	-6.75387	1.43948e-11	2.02263e-09	TRUE	DOWN	ENST00000606017.2
FTH1	0.945953	-2.68213	0.829893	-3.2319	0.00122971	0.0134211	TRUE	DOWN	ENSG00000167996.16		S100A4-201	4.61152	-4.70344	0.677823	-6.93904	3.94771e-12	6.40035e-10	TRUE	DOWN	ENST00000354332.8
NLRP1	0.75056	-2.68826	0.89924	-2.98948	0.00279457	0.0250379	TRUE	DOWN	ENSG00000091592.17		LY6K-201	3.11053	-4.73943	0.691391	-6.85491	7.13573e-12	1.06163e-09	TRUE	DOWN	ENST00000292430.10
FSTL4	0.772289	-2.69858	0.930952	-2.89873	0.00374679	0.0309776	TRUE	DOWN	ENSG00000053108.17		MGST1-205	3.82143	-4.74044	0.685922	-6.91105	4.81096e-12	7.41943e-10	TRUE	DOWN	ENST00000396210.8
FAM83H	0.713976	-2.70098	0.888257	-3.04076	0.00235981	0.0218865	TRUE	DOWN	ENSG00000180921.7		S100A6-202	2.5815	-4.79938	0.70221	-6.83467	8.21925e-12	1.19472e-09	TRUE	DOWN	ENST00000368720.6
ASB9	0.770195	-2.7218	0.907002	-3.00088	0.00269202	0.0242458	TRUE	DOWN	ENSG00000102048.16		ASS1-201	4.82192	-4.82192	0.676112	-7.13183	9.90409e-13	1.78924e-10	TRUE	DOWN	ENST00000352480.10
GPC1	0.581063	-2.72458	1.00317	-2.71598	0.00660796	0.0464794	TRUE	DOWN	ENSG00000063660.9		CGA-204	8.85428	-4.8787	0.602672	-8.09512	5.72102e-16	1.68251e-13	TRUE	DOWN	ENST00000627148.3
NFIX	1.27889	-2.72679	0.77917	-3.49961	0.000465945	0.00634565	TRUE	DOWN	ENSG00000008441.19		SRGN-201	4.54609	-5.01507	0.679503	-7.38049	1.57705e-13	3.16562e-11	TRUE	DOWN	ENST00000242465.4
PDE10A	2.98796	-2.72901	0.579451	-4.70964	2.48158e-06	8.42017e-05	TRUE	DOWN	ENSG00000112541.19		NQO1-201	6.23968	-5.20539	0.667481	-7.79856	6.26183e-15	1.43977e-12	TRUE	DOWN	ENST00000320623.10
RNF182	0.94955	-2.73429	0.822191	-3.32561	0.000882241	0.0105163	TRUE	DOWN	ENSG00000180537.13		KRT81-201	6.32801	-5.22496	0.667556	-7.827	4.99661e-15	1.18225e-12	TRUE	DOWN	ENST00000327741.9
LUZP2	0.595812	-2.73718	0.978694	-2.79676	0.00516174	0.0387074	TRUE	DOWN	ENSG00000187398.12		S100A4-204	5.39072	-5.26602	0.672913	-7.8257	5.04834e-15	1.18225e-12	TRUE	DOWN	ENST00000368716.9
NEXN	1.53585	-2.7537	0.734537	-3.74889	0.00017762	0.00294772	TRUE	DOWN	ENSG00000162614.19		TM4SF1-201	4.69024	-5.36373	0.676582	-7.92769	2.23264e-15	5.6468e-13	TRUE	DOWN	ENST00000305366.8
ADAM12	0.630095	-2.78215	0.94675	-2.93863	0.00329664	0.0283147	TRUE	DOWN	ENSG00000148848.15		S100A2-202	4.52229	-5.60598	0.679317	-8.25238	1.55274e-16	5.16734e-14	TRUE	DOWN	ENST00000368708.9
ERGIC1	1.9722	-2.80852	0.701137	-4.00566	6.18445e-05	0.00125039	TRUE	DOWN	ENSG00000113719.17		IFITM3-201	7.5742	-5.76449	0.664176	-8.67916	3.98707e-18	1.68068e-15	TRUE	DOWN	ENST00000399808.5
H4C9	0.655374	-2.81215	0.988386	-2.84519	0.00443848	0.0349269	TRUE	DOWN	ENSG00000276180.2		S100A6-205	6.6323	-6.15855	0.668542	-9.21192	3.2033e-20	1.55803e-17	TRUE	DOWN	ENST00000496817.5
GPC5	0.657209	-2.81802	0.972866	-2.89662	0.0037721	0.0310371	TRUE	DOWN	ENSG00000179399.15
PLEC	3.49528	-2.82347	0.542226	-5.20719	1.91721e-07	7.86858e-06	TRUE	DOWN	ENSG00000178209.17
FOXF1	0.635878	-2.83624	0.953427	-2.97478	0.00293198	0.0259864	TRUE	DOWN	ENSG00000103241.7
COL5A2	0.63576	-2.84077	1.00704	-2.8209	0.00478886	0.0366736	TRUE	DOWN	ENSG00000204262.14
ITPR1	2.71585	-2.84531	0.614953	-4.62688	3.71208e-06	0.000116176	TRUE	DOWN	ENSG00000150995.21
VASN	0.650132	-2.85571	0.941628	-3.03274	0.00242342	0.0223856	TRUE	DOWN	ENSG00000168140.5
SLC38A5	0.616305	-2.85662	0.948242	-3.01254	0.00259069	0.0236439	TRUE	DOWN	ENSG00000017483.16
EPAS1	1.9156	-2.8632	0.705976	-4.05566	4.99929e-05	0.00104149	TRUE	DOWN	ENSG00000116016.14
LIMCH1	2.69195	-2.86615	0.615438	-4.65709	3.20704e-06	0.000102715	TRUE	DOWN	ENSG00000064042.18
SYNPO	0.654502	-2.86917	0.97087	-2.95525	0.00312415	0.0272587	TRUE	DOWN	ENSG00000171992.13
SNAP25	0.666381	-2.86966	0.936056	-3.06569	0.00217167	0.0205873	TRUE	DOWN	ENSG00000132639.15
CALD1	7.53526	-2.87019	0.379555	-7.562	3.9693e-14	4.61633e-12	TRUE	DOWN	ENSG00000122786.20
WFDC1	1.09133	-2.8926	0.813385	-3.55625	0.00037618	0.00538275	TRUE	DOWN	ENSG00000103175.11
MIR100HG	0.695904	-2.9001	0.91276	-3.17728	0.00148662	0.0155324	TRUE	DOWN	ENSG00000255248.11
F3	1.08867	-2.90273	0.796672	-3.64357	0.000268883	0.00411366	TRUE	DOWN	ENSG00000117525.14
NPTX1	1.43058	-2.91533	0.769092	-3.79062	0.000150274	0.00264096	TRUE	DOWN	ENSG00000171246.7
ZFAS1	1.42567	-2.91835	0.76447	-3.81748	0.000134821	0.00241108	TRUE	DOWN	ENSG00000177410.13
ENSG00000275993	0.887278	-2.93303	0.83776	-3.50104	0.000463441	0.00633417	TRUE	DOWN	ENSG00000275993.4
TBXT	1.12331	-2.93379	0.786936	-3.72812	0.000192917	0.00314075	TRUE	DOWN	ENSG00000164458.10
SLC2A4RG	1.18359	-2.94093	0.801765	-3.66807	0.000244386	0.00382424	TRUE	DOWN	ENSG00000125520.14
SIX2	0.679329	-2.95181	0.992149	-2.97516	0.00292832	0.0259864	TRUE	DOWN	ENSG00000170577.8
PDE4D	2.866	-2.95869	0.614749	-4.81285	1.48794e-06	5.39595e-05	TRUE	DOWN	ENSG00000113448.20
DLGAP1-AS1	0.733505	-2.98093	0.921963	-3.23324	0.00122394	0.0134211	TRUE	DOWN	ENSG00000177337.10
DNER	0.720871	-2.9872	0.907325	-3.29232	0.000993645	0.0115041	TRUE	DOWN	ENSG00000187957.8
PIR	2.62971	-3.01214	0.647072	-4.65502	3.23947e-06	0.00010303	TRUE	DOWN	ENSG00000087842.11
ENSG00000276850	0.743885	-3.01945	0.934585	-3.23079	0.00123447	0.0134516	TRUE	DOWN	ENSG00000276850.5
FSTL3	1.1431	-3.02887	0.802816	-3.7728	0.000161424	0.00276569	TRUE	DOWN	ENSG00000070404.10
BARX1	0.733718	-3.03102	0.898963	-3.37168	0.000747112	0.00914411	TRUE	DOWN	ENSG00000131668.14
AKR1C2	0.973518	-3.0629	0.830652	-3.68735	0.000226602	0.00359521	TRUE	DOWN	ENSG00000151632.18
ENSG00000277693	0.772815	-3.06479	0.907448	-3.37737	0.000731817	0.00902076	TRUE	DOWN	ENSG00000277693.2
LINC-PINT	0.970589	-3.07284	0.819133	-3.75133	0.0001759	0.00293839	TRUE	DOWN	ENSG00000231721.8
ENSG00000289575	0.980047	-3.07738	0.802405	-3.8352	0.000125463	0.00228097	TRUE	DOWN	ENSG00000289575.1
LINC01116	0.983987	-3.08016	0.812817	-3.78949	0.000150958	0.0026462	TRUE	DOWN	ENSG00000163364.12
DDIT4	3.88885	-3.08323	0.537323	-5.73814	9.57243e-09	5.16609e-07	TRUE	DOWN	ENSG00000168209.6
MAGEA12	0.940105	-3.09795	0.837275	-3.70004	0.000215565	0.003436	TRUE	DOWN	ENSG00000213401.10
TSPAN4	0.774315	-3.11319	0.88485	-3.51832	0.000434284	0.00604996	TRUE	DOWN	ENSG00000214063.12
RASA3	0.735028	-3.11827	0.889014	-3.50757	0.000452227	0.00621997	TRUE	DOWN	ENSG00000185989.11
PHLDB2	1.0252	-3.12136	0.811672	-3.8456	0.000120258	0.00219799	TRUE	DOWN	ENSG00000144824.21
GDA	0.78004	-3.13113	0.879093	-3.56178	0.000368351	0.00530395	TRUE	DOWN	ENSG00000119125.17
EFNA1	0.976362	-3.13174	0.800177	-3.91381	9.0853e-05	0.00176969	TRUE	DOWN	ENSG00000169242.12
DNAJB4	2.35191	-3.14111	0.684494	-4.58895	4.45474e-06	0.000138785	TRUE	DOWN	ENSG00000162616.9
AVPI1	1.24893	-3.15029	0.77487	-4.06557	4.79142e-05	0.00101047	TRUE	DOWN	ENSG00000119986.7
COL8A1	0.799145	-3.15282	0.899636	-3.50455	0.000457379	0.00626976	TRUE	DOWN	ENSG00000144810.16
PDE1A	1.04767	-3.15755	0.808578	-3.90507	9.41983e-05	0.00180345	TRUE	DOWN	ENSG00000115252.19
ADGRG1	1.00042	-3.18282	0.826129	-3.8527	0.000116824	0.00215246	TRUE	DOWN	ENSG00000205336.14
FAM102B	1.29821	-3.19352	0.770643	-4.14396	3.41355e-05	0.000768758	TRUE	DOWN	ENSG00000162636.16
GCNT2	0.790249	-3.19447	0.904728	-3.53086	0.000414211	0.00584157	TRUE	DOWN	ENSG00000111846.20
GLP2R	0.818657	-3.20268	0.838755	-3.81837	0.000134336	0.00241031	TRUE	DOWN	ENSG00000065325.13
EEF1A2	5.37217	-3.21708	0.48034	-6.69751	2.12007e-11	1.72987e-09	TRUE	DOWN	ENSG00000101210.14
IL11	0.853441	-3.22981	0.854838	-3.77827	0.000157923	0.00271279	TRUE	DOWN	ENSG00000095752.7
DUSP2	0.81735	-3.2323	0.857733	-3.76842	0.000164286	0.00278717	TRUE	DOWN	ENSG00000158050.5
SIK1	0.883237	-3.25487	0.830301	-3.92011	8.85073e-05	0.00173323	TRUE	DOWN	ENSG00000142178.9
SERPINB5	1.40392	-3.28816	0.760516	-4.32358	1.53515e-05	0.0004016	TRUE	DOWN	ENSG00000206075.14
DNAJC15	1.32039	-3.31007	0.770403	-4.29654	1.73486e-05	0.00044702	TRUE	DOWN	ENSG00000120675.6
HSPB1	12.4435	-3.31853	0.321466	-10.3231	5.53937e-25	2.23334e-22	TRUE	DOWN	ENSG00000106211.10
PLPP2	1.1324	-3.32755	0.792053	-4.20117	2.6554e-05	0.00062759	TRUE	DOWN	ENSG00000141934.10
SEMA3A	1.77081	-3.33915	0.730648	-4.57012	4.87438e-06	0.000149816	TRUE	DOWN	ENSG00000075213.11
AP1M2	0.910509	-3.35582	0.8153	-4.11605	3.8542e-05	0.000846859	TRUE	DOWN	ENSG00000129354.12
C3	1.20254	-3.35839	0.788093	-4.26142	2.03137e-05	0.000499031	TRUE	DOWN	ENSG00000125730.18
PLA2G4A	5.29195	-3.36911	0.4987	-6.7558	1.42051e-11	1.18734e-09	TRUE	DOWN	ENSG00000116711.10
CAPG	0.932501	-3.37032	0.817442	-4.12301	3.73955e-05	0.000832171	TRUE	DOWN	ENSG00000042493.16
SLC7A11	3.18804	-3.39065	0.63888	-5.30718	1.11337e-07	4.73976e-06	TRUE	DOWN	ENSG00000151012.13
FOS	1.24916	-3.39787	0.797181	-4.26235	2.02286e-05	0.000499031	TRUE	DOWN	ENSG00000170345.10
CPT1A	2.78668	-3.42594	0.677226	-5.05877	4.2196e-07	1.66214e-05	TRUE	DOWN	ENSG00000110090.13
KYNU	5.19681	-3.43453	0.526052	-6.52888	6.62636e-11	5.04634e-09	TRUE	DOWN	ENSG00000115919.15
PDE3A	1.87511	-3.45103	0.736426	-4.68618	2.7835e-06	9.21649e-05	TRUE	DOWN	ENSG00000172572.7
SFN	1.01783	-3.46179	0.810284	-4.27231	1.93457e-05	0.000485699	TRUE	DOWN	ENSG00000175793.12
CCND3	2.36922	-3.51073	0.696052	-5.04377	4.56452e-07	1.78773e-05	TRUE	DOWN	ENSG00000112576.13
EPGN	1.04049	-3.55862	0.806598	-4.41189	1.02474e-05	0.000280942	TRUE	DOWN	ENSG00000182585.10
PLAC8	1.33038	-3.56117	0.78468	-4.53837	5.66899e-06	0.000170468	TRUE	DOWN	ENSG00000145287.11
NNMT	1.35131	-3.56975	0.766938	-4.65455	3.24692e-06	0.00010303	TRUE	DOWN	ENSG00000166741.8
NYAP2	1.05787	-3.60055	0.803337	-4.48199	7.39492e-06	0.000212961	TRUE	DOWN	ENSG00000144460.13
GSTM4	1.42663	-3.60202	0.764416	-4.71212	2.45151e-06	8.40133e-05	TRUE	DOWN	ENSG00000168765.19
KCNJ18	1.11135	-3.60409	0.801796	-4.49502	6.95649e-06	0.000202689	TRUE	DOWN	ENSG00000260458.3
AQP3	1.3788	-3.60719	0.771912	-4.67306	2.96745e-06	9.6393e-05	TRUE	DOWN	ENSG00000165272.16
MAGEA3	1.45923	-3.70783	0.764259	-4.85154	1.22506e-06	4.53869e-05	TRUE	DOWN	ENSG00000221867.9
TMSB4X	34.5291	-3.71196	0.218095	-17.0199	5.84797e-65	2.0041e-61	TRUE	DOWN	ENSG00000205542.11
TCIM	2.75964	-3.72355	0.688337	-5.40949	6.32062e-08	2.83147e-06	TRUE	DOWN	ENSG00000176907.5
SLC7A5	7.96968	-3.72909	0.446505	-8.35175	6.72615e-17	1.35591e-14	TRUE	DOWN	ENSG00000103257.9
CSAG1	1.18514	-3.73223	0.789273	-4.7287	2.2596e-06	7.82188e-05	TRUE	DOWN	ENSG00000198930.13
L1CAM	1.58846	-3.75353	0.752771	-4.98628	6.15535e-07	2.38355e-05	TRUE	DOWN	ENSG00000198910.14
PRSS21	2.31422	-3.75767	0.714396	-5.25992	1.44116e-07	5.98647e-06	TRUE	DOWN	ENSG00000007038.11
GNG11	2.9115	-3.77042	0.682721	-5.52264	3.33952e-08	1.60063e-06	TRUE	DOWN	ENSG00000127920.6
S100A16	1.26495	-3.81589	1.085	-3.51696	0.000436524	0.00606883	TRUE	DOWN	ENSG00000188643.11
PRSS23	7.6811	-3.82019	0.464424	-8.22565	1.94131e-16	3.35933e-14	TRUE	DOWN	ENSG00000150687.12
LGALS1	15.6993	-3.90132	0.337968	-11.5435	7.96582e-31	3.89984e-28	TRUE	DOWN	ENSG00000100097.12
RIMS1	2.58792	-3.91034	0.701452	-5.57464	2.48042e-08	1.22308e-06	TRUE	DOWN	ENSG00000079841.20
ALPL	1.36489	-3.9105	0.76511	-5.11104	3.20396e-07	1.2994e-05	TRUE	DOWN	ENSG00000162551.14
C4BPB	1.80144	-3.95953	0.729829	-5.42528	5.78632e-08	2.60917e-06	TRUE	DOWN	ENSG00000123843.13
SLPI	2.20499	-3.99062	0.712498	-5.60088	2.13262e-08	1.07478e-06	TRUE	DOWN	ENSG00000124107.5
ELFN1-AS1	1.45782	-4.00334	0.747929	-5.35257	8.67117e-08	3.80177e-06	TRUE	DOWN	ENSG00000236081.1
COL5A1	2.21689	-4.00643	0.71023	-5.64103	1.69034e-08	8.64597e-07	TRUE	DOWN	ENSG00000130635.17
ADARB2	1.45247	-4.03443	0.754787	-5.34513	9.03534e-08	3.91951e-06	TRUE	DOWN	ENSG00000185736.16
KRT17	2.26653	-4.05247	0.717154	-5.65077	1.59734e-08	8.23171e-07	TRUE	DOWN	ENSG00000128422.18
TPM2	3.62493	-4.0993	0.680131	-6.02722	1.66803e-09	1.04887e-07	TRUE	DOWN	ENSG00000198467.16
MYL9	1.56288	-4.10367	0.745043	-5.50797	3.62996e-08	1.71585e-06	TRUE	DOWN	ENSG00000101335.10
COL3A1	1.92735	-4.10991	0.723612	-5.67972	1.34917e-08	7.11323e-07	TRUE	DOWN	ENSG00000168542.16
OLFM1	6.08332	-4.1373	0.576005	-7.18276	6.83166e-13	6.76962e-11	TRUE	DOWN	ENSG00000130558.20
VWA5A	1.54005	-4.14343	0.756752	-5.47528	4.36821e-08	2.00938e-06	TRUE	DOWN	ENSG00000110002.16
CPS1	19.5409	-4.1464	0.328647	-12.6166	1.7109e-36	1.30294e-33	TRUE	DOWN	ENSG00000021826.18
DIO2	1.58792	-4.17123	0.750817	-5.55558	2.76688e-08	1.34498e-06	TRUE	DOWN	ENSG00000211448.14
PSMD5	1.70581	-4.2147	0.750764	-5.61389	1.97831e-08	1.0044e-06	TRUE	DOWN	ENSG00000095261.14
TGFBI	2.58081	-4.24015	0.707476	-5.99335	2.05557e-09	1.25794e-07	TRUE	DOWN	ENSG00000120708.17
LPL	3.44392	-4.31617	0.690453	-6.25121	4.07272e-10	2.81964e-08	TRUE	DOWN	ENSG00000175445.17
COL7A1	2.77607	-4.34051	0.697386	-6.22397	4.84732e-10	3.28946e-08	TRUE	DOWN	ENSG00000114270.18
BASP1	13.029	-4.43522	0.438107	-10.1236	4.34123e-24	1.65305e-21	TRUE	DOWN	ENSG00000176788.9
MYOF	2.00464	-4.43684	0.733536	-6.04857	1.4614e-09	9.27451e-08	TRUE	DOWN	ENSG00000138119.17
MAGEA6	1.94104	-4.49172	0.725484	-6.19134	5.96552e-10	4.0086e-08	TRUE	DOWN	ENSG00000197172.11
NPR3	2.79907	-4.66179	0.700459	-6.65533	2.82665e-11	2.22688e-09	TRUE	DOWN	ENSG00000113389.16
CASC19	10.0265	-4.69004	0.530983	-8.83275	1.0213e-18	2.33333e-16	TRUE	DOWN	ENSG00000254166.4
PPDPFL	2.42925	-4.7044	0.718964	-6.54331	6.017e-11	4.63376e-09	TRUE	DOWN	ENSG00000168333.14
ASS1	9.00032	-4.7294	0.567787	-8.32953	8.1162e-17	1.58938e-14	TRUE	DOWN	ENSG00000130707.18
BST2	4.60154	-4.76085	0.677915	-7.02278	2.17498e-12	2.0421e-10	TRUE	DOWN	ENSG00000130303.14
CD24	5.85583	-4.87191	0.656762	-7.41808	1.18831e-13	1.31366e-11	TRUE	DOWN	ENSG00000272398.6
MGST1	5.20178	-4.9291	0.672266	-7.33206	2.26642e-13	2.35365e-11	TRUE	DOWN	ENSG00000008394.13
NQO1	6.21267	-4.94676	0.65392	-7.56478	3.88519e-14	4.61633e-12	TRUE	DOWN	ENSG00000181019.13
EFEMP1	6.79776	-5.05198	0.654504	-7.7188	1.17432e-14	1.54785e-12	TRUE	DOWN	ENSG00000115380.20
SRGN	4.64036	-5.08532	0.678703	-7.49271	6.74667e-14	7.70694e-12	TRUE	DOWN	ENSG00000122862.5
S100A4	12.4389	-5.1702	0.560694	-9.22107	2.9414e-20	8.06415e-18	TRUE	DOWN	ENSG00000196154.12
CGA	9.26752	-5.24125	0.633802	-8.26953	1.34485e-16	2.42568e-14	TRUE	DOWN	ENSG00000135346.9
KRT81	6.27465	-5.2435	0.667505	-7.85537	3.98582e-15	5.81251e-13	TRUE	DOWN	ENSG00000205426.11
AKR1C3	7.74283	-5.28241	0.651571	-8.10719	5.18044e-16	8.25738e-14	TRUE	DOWN	ENSG00000196139.14
S100A6	28.2186	-5.48818	0.412335	-13.31	2.02476e-40	1.98253e-37	TRUE	DOWN	ENSG00000197956.10
TM4SF1	5.07261	-5.52766	0.673213	-8.21086	2.19608e-16	3.67121e-14	TRUE	DOWN	ENSG00000169908.12
S100A2	6.06802	-5.78366	0.670494	-8.62596	6.35588e-18	1.36135e-15	TRUE	DOWN	ENSG00000196754.13
IFITM3	8.14254	-5.91062	0.662502	-8.92166	4.59333e-19	1.08561e-16	TRUE	DOWN	ENSG00000142089.17
10 hour post-sequencing initiation											10 hour post-sequencing initiation
gene name	gene base mean	log 2 fold change	lfcSE	stat	p-value	p-adjusted	significance	significance_reg	gene ID		transcript name	transcript base mean	log 2 fold change	lfcSE	stat	p-value	p-adjusted	significance	significance_reg	gene ID
UCHL1	11.8064	7.04438	0.657562	10.7129	8.85637e-27	1.9318e-24	TRUE	UP	ENSG00000154277.13		UCHL1-201	9.0942	6.71946	0.663063	10.134	3.90476e-24	1.00775e-21	TRUE	UP	ENST00000284440.9
IRS4	25.3618	6.99063	0.636384	10.9849	4.51623e-28	1.06497e-25	TRUE	UP	ENSG00000133124.12		IRS4-201	19.4193	6.65709	0.639985	10.4019	2.42929e-25	7.6802e-23	TRUE	UP	ENST00000372129.4
CHRM2	7.28196	6.07293	0.66526	9.12865	6.93592e-20	8.52337e-18	TRUE	UP	ENSG00000181072.12		XIST-223	18.6225	6.58055	0.638925	10.2994	7.09e-25	2.08512e-22	TRUE	UP	ENST00000650366.1
NEFL	8.62563	5.70412	0.659404	8.65041	5.13126e-18	5.26709e-16	TRUE	UP	ENSG00000277586.4		IRS4-202	18.6592	6.3055	0.622402	10.1309	4.02846e-24	1.01888e-21	TRUE	UP	ENST00000564206.2
BEX4	4.61385	5.67455	0.678085	8.3685	5.83567e-17	5.53437e-15	TRUE	UP	ENSG00000102409.10		NEFL-201	39.0917	6.25934	0.442334	14.1507	1.84844e-45	1.46096e-42	TRUE	UP	ENST00000610854.2
SLIT2	22.5115	5.67236	0.490925	11.5544	7.00974e-31	1.9729e-28	TRUE	UP	ENSG00000145147.20		XIST-225	23.588	6.17303	0.553119	11.1604	6.37016e-29	2.77783e-26	TRUE	UP	ENST00000650627.1
AFDN	5.42991	5.5895	0.672025	8.31739	8.992e-17	8.3463e-15	TRUE	UP	ENSG00000130396.22		XIST-218	14.3125	5.91429	0.62487	9.46484	2.94009e-21	6.30176e-19	TRUE	UP	ENST00000648970.1
ID4	3.98463	5.51983	0.680275	8.11411	4.89354e-16	4.14526e-14	TRUE	UP	ENSG00000172201.12		BEX4-202	4.80084	5.78707	0.677273	8.54466	1.28914e-17	2.01264e-15	TRUE	UP	ENST00000372695.6
CREB5	3.88416	5.49417	0.68349	8.03841	9.10136e-16	7.42144e-14	TRUE	UP	ENSG00000146592.17		ID4-201	4.47458	5.74082	0.67815	8.46541	2.55255e-17	3.75344e-15	TRUE	UP	ENST00000378700.8
MAGED1	3.98951	5.47703	0.681207	8.04019	8.97025e-16	7.38353e-14	TRUE	UP	ENSG00000179222.18		RADX-202	4.34022	5.68484	0.678194	8.38233	5.18903e-17	7.45687e-15	TRUE	UP	ENST00000372548.9
XIST	43.2631	5.39807	0.326455	16.5354	2.03935e-61	1.48278e-58	TRUE	UP	ENSG00000229807.13		CA2-201	11.0102	5.55093	0.628451	8.83272	1.02163e-18	1.74588e-16	TRUE	UP	ENST00000285379.10
CA2	11.424	5.29349	0.597879	8.85378	8.46038e-19	9.71274e-17	TRUE	UP	ENSG00000104267.10		XIST-204	69.6851	5.45933	0.25903	21.0761	1.31858e-98	7.45864e-95	TRUE	UP	ENST00000429829.6
HOXA5	3.31592	5.21075	0.689449	7.55784	4.09807e-14	2.90696e-12	TRUE	UP	ENSG00000106004.5		SLIT2-204	15.8345	5.38332	0.522903	10.2951	7.41702e-25	2.13172e-22	TRUE	UP	ENST00000504154.6
RADX	7.96383	5.0521	0.634523	7.96205	1.69208e-15	1.34213e-13	TRUE	UP	ENSG00000147231.14		AMOT-203	5.10724	5.3147	0.673371	7.89267	2.95778e-15	3.36974e-13	TRUE	UP	ENST00000371959.9
PCDH10	3.07036	4.77767	0.690457	6.91958	4.5298e-12	2.47015e-10	TRUE	UP	ENSG00000138650.9		XIST-221	7.62731	5.30135	0.650284	8.15236	3.56884e-16	4.55875e-14	TRUE	UP	ENST00000649757.1
RN7SL3	2.38779	4.7307	0.725801	6.5179	7.12983e-11	3.41801e-09	TRUE	UP	ENSG00000278771.1		FHL1-216	3.73281	5.11959	0.68419	7.48271	7.28076e-14	7.1374e-12	TRUE	UP	ENST00000543669.5
HES4	3.56462	4.70716	0.683241	6.88945	5.60092e-12	3.03528e-10	TRUE	UP	ENSG00000188290.11		HOXA5-201	3.69835	5.10166	0.686992	7.42609	1.11858e-13	1.07164e-11	TRUE	UP	ENST00000222726.4
AASS	2.3417	4.68902	0.721875	6.49562	8.26943e-11	3.92124e-09	TRUE	UP	ENSG00000008311.16		SLIT2-212	2.94843	5.05357	0.697987	7.2402	4.48035e-13	3.99003e-11	TRUE	UP	ENST00000622093.4
HOXD10	2.23094	4.65225	0.717687	6.48228	9.03442e-11	4.22042e-09	TRUE	UP	ENSG00000128710.6		GPR50-201	4.00306	4.94265	0.683918	7.22696	4.93917e-13	4.33755e-11	TRUE	UP	ENST00000218316.4
SOX11	2.19995	4.64274	0.716543	6.47936	9.21148e-11	4.27501e-09	TRUE	UP	ENSG00000176887.7		HDGFL3-201	2.58695	4.89685	0.703525	6.96046	3.39174e-12	2.74949e-10	TRUE	UP	ENST00000299633.7
AMOT	8.12503	4.59794	0.565054	8.13717	4.04613e-16	3.46103e-14	TRUE	UP	ENSG00000126016.17		MAF-202	3.06743	4.83698	0.700872	6.90137	5.15018e-12	4.04529e-10	TRUE	UP	ENST00000393350.1
MAF	3.30414	4.5858	0.694449	6.60351	4.01533e-11	2.00193e-09	TRUE	UP	ENSG00000178573.7		XIST-219	7.4413	4.72994	0.605582	7.81056	5.69326e-15	6.05017e-13	TRUE	UP	ENST00000648991.1
HDGFL3	2.68704	4.55552	0.700438	6.50382	7.83053e-11	3.73341e-09	TRUE	UP	ENSG00000166503.9		CHRM2-203	2.16734	4.69479	0.715471	6.56181	5.3157e-11	3.53802e-09	TRUE	UP	ENST00000445907.6
AKT3	2.1043	4.52629	0.71859	6.29885	2.99858e-10	1.2888e-08	TRUE	UP	ENSG00000117020.19		XIST-222	3.44497	4.67707	0.691568	6.76299	1.3517e-11	1.0055e-09	TRUE	UP	ENST00000650186.1
TNC	2.32445	4.39478	0.707206	6.21428	5.15602e-10	2.11203e-08	TRUE	UP	ENSG00000041982.17		HOXD10-201	2.15628	4.63597	0.727548	6.37205	1.86519e-10	1.1232e-08	TRUE	UP	ENST00000249501.5
BEX1	2.24356	4.3291	0.722391	5.99273	2.06349e-09	7.727e-08	TRUE	UP	ENSG00000133169.6		RN7SL3-201	2.66482	4.63505	0.710578	6.52293	6.89478e-11	4.4944e-09	TRUE	UP	ENST00000610674.1
TMSB15A	1.81755	4.29431	0.736242	5.83274	5.45234e-09	1.85827e-07	TRUE	UP	ENSG00000158164.7		SOX11-201	2.59649	4.63374	0.704967	6.57299	4.93144e-11	3.31718e-09	TRUE	UP	ENST00000322002.5
CACNG8	1.75556	4.28353	0.742669	5.76775	8.03356e-09	2.65503e-07	TRUE	UP	ENSG00000142408.7		BHLHE22-201	2.72321	4.6196	0.700203	6.59751	4.18107e-11	2.84268e-09	TRUE	UP	ENST00000321870.3
NRG1	2.22177	4.27742	0.71156	6.01133	1.84003e-09	6.95069e-08	TRUE	UP	ENSG00000157168.21		ENST00000625101	2.62607	4.57972	0.702349	6.52058	7.00372e-11	4.542e-09	TRUE	UP	ENST00000625101.1
RNF122	2.12099	4.24642	0.717095	5.9217	3.18633e-09	1.15668e-07	TRUE	UP	ENSG00000133874.2		CREB5-201	2.03582	4.56178	0.727007	6.27474	3.50228e-10	2.01317e-08	TRUE	UP	ENST00000357727.7
FOXG1	1.6342	4.23338	0.744666	5.68495	1.30854e-08	4.12165e-07	TRUE	UP	ENSG00000176165.13		PCDH10-201	2.56182	4.55492	0.703509	6.47457	9.50814e-11	5.98209e-09	TRUE	UP	ENST00000264360.7
EPB41L3	1.62046	4.1765	0.741293	5.63407	1.76009e-08	5.40732e-07	TRUE	UP	ENSG00000082397.18		HLA-DPB1-211	2.02553	4.51511	0.722273	6.25125	4.07174e-10	2.31942e-08	TRUE	UP	ENST00000418931.7
LIN28B	2.02295	4.17216	0.723621	5.76568	8.13309e-09	2.67778e-07	TRUE	UP	ENSG00000187772.8		AFDN-222	2.06737	4.50004	0.722923	6.22478	4.82231e-10	2.69836e-08	TRUE	UP	ENST00000515794.3
KCNQ1OT1	3.01939	4.15423	0.694484	5.98175	2.20751e-09	8.12679e-08	TRUE	UP	ENSG00000269821.1		BEX1-201	2.38173	4.47247	0.715371	6.25196	4.05339e-10	2.31942e-08	TRUE	UP	ENST00000372728.4
ZNF711	1.60752	4.13429	0.747736	5.52908	3.21921e-08	9.55361e-07	TRUE	UP	ENSG00000147180.17		TMSB15A-201	1.89968	4.40846	0.732145	6.02129	1.7303e-09	8.75256e-08	TRUE	UP	ENST00000289373.5
GSTA4	1.90325	4.12441	0.726171	5.67967	1.34952e-08	4.23546e-07	TRUE	UP	ENSG00000170899.11		CHRM2-208	2.29957	4.38545	0.715588	6.12846	8.87345e-10	4.71486e-08	TRUE	UP	ENST00000680005.1
NEO1	1.57443	4.10185	0.776399	5.28318	1.26961e-07	3.39797e-06	TRUE	UP	ENSG00000067141.17		MIR222HG-202	1.69528	4.3089	0.741877	5.80811	6.31824e-09	2.8134e-07	TRUE	UP	ENST00000602507.1
SYK	1.4657	4.09623	0.772254	5.30426	1.13132e-07	3.07499e-06	TRUE	UP	ENSG00000165025.15		CHRM2-204	1.62937	4.2973	0.744955	5.76853	7.99639e-09	3.52343e-07	TRUE	UP	ENST00000453373.5
SMARCA2	1.91588	4.06877	0.734897	5.53652	3.08546e-08	9.21941e-07	TRUE	UP	ENSG00000080503.25		CACNG8-201	2.05006	4.26306	0.724834	5.88142	4.0675e-09	1.87728e-07	TRUE	UP	ENST00000270458.4
FHL1	11.6741	4.04915	0.407344	9.94038	2.77776e-23	4.75215e-21	TRUE	UP	ENSG00000022267.19		XIST-212	1.65289	4.24039	0.74069	5.72491	1.03486e-08	4.49721e-07	TRUE	UP	ENST00000647696.1
SLC16A10	1.83171	4.04593	0.731012	5.5347	3.1177e-08	9.28394e-07	TRUE	UP	ENSG00000112394.18		XIST-216	1.64151	4.23806	0.749816	5.65213	1.58468e-08	6.65777e-07	TRUE	UP	ENST00000648829.1
ECHDC2	3.43474	4.03391	0.67573	5.96971	2.37682e-09	8.71333e-08	TRUE	UP	ENSG00000121310.17		FHL1-234	3.05172	4.2019	0.70237	5.98245	2.19805e-09	1.09435e-07	TRUE	UP	ENST00000651929.2
CDS1	1.46433	3.99201	0.751489	5.31214	1.08345e-07	2.97268e-06	TRUE	UP	ENSG00000163624.6		TUBA1A-202	5.21247	4.19141	0.613271	6.83451	8.2283e-12	6.23084e-10	TRUE	UP	ENST00000301071.12
ZFHX4	1.43443	3.98584	0.972493	4.09858	4.15696e-05	0.000533375	TRUE	UP	ENSG00000091656.19		LIN28B-201	1.95288	4.17928	0.728201	5.73919	9.51296e-09	4.14831e-07	TRUE	UP	ENST00000345080.5
DLC1	1.41666	3.95923	0.795476	4.97718	6.45167e-07	1.48917e-05	TRUE	UP	ENSG00000164741.15		XIST-201	1.55784	4.17513	0.751682	5.55439	2.78588e-08	1.11842e-06	TRUE	UP	ENST00000416330.2
GJA1	1.79234	3.95661	0.734754	5.38494	7.24694e-08	2.05464e-06	TRUE	UP	ENSG00000152661.9		HOXD11-201	1.44065	4.15085	0.766775	5.41339	6.18426e-08	2.28673e-06	TRUE	UP	ENST00000249504.7
MYOM2	1.76578	3.94711	0.740732	5.32866	9.89407e-08	2.7405e-06	TRUE	UP	ENSG00000036448.10		CHRM2-202	1.4924	4.12196	0.74521	5.53128	3.17901e-08	1.26421e-06	TRUE	UP	ENST00000401861.1
NID1	2.13769	3.92354	0.72062	5.44468	5.18997e-08	1.50726e-06	TRUE	UP	ENSG00000116962.15		NEFL-202	1.53559	4.08842	0.759433	5.38352	7.30437e-08	2.63917e-06	TRUE	UP	ENST00000615973.1
HOMER2	1.34959	3.92225	0.757947	5.17483	2.28115e-07	5.70772e-06	TRUE	UP	ENSG00000103942.13		TIMP3-201	1.5426	4.08388	0.751426	5.43484	5.48464e-08	2.05812e-06	TRUE	UP	ENST00000266085.7
BHLHE22	1.81514	3.9184	0.739429	5.29923	1.16292e-07	3.14134e-06	TRUE	UP	ENSG00000180828.3		UCHL1-202	1.49627	4.06539	0.754488	5.38827	7.11378e-08	2.58508e-06	TRUE	UP	ENST00000381760.8
ADGRL2	2.21181	3.89849	0.745651	5.22831	1.71069e-07	4.44219e-06	TRUE	UP	ENSG00000117114.21		MAGED1-201	1.34757	4.0571	0.771474	5.2589	1.4492e-07	4.90015e-06	TRUE	UP	ENST00000326587.12
TIMP3	1.40446	3.88927	0.773888	5.02562	5.01816e-07	1.18977e-05	TRUE	UP	ENSG00000100234.12		RNF122-201	2.19117	4.04232	0.715711	5.64798	1.62348e-08	6.79817e-07	TRUE	UP	ENST00000256257.2
MFGE8	2.0906	3.8704	0.727115	5.32296	1.0209e-07	2.81878e-06	TRUE	UP	ENSG00000140545.16		ATP5PF-204	1.75238	4.02304	0.851595	4.72412	2.31114e-06	5.95248e-05	TRUE	UP	ENST00000400093.3
BEX2	1.27708	3.85847	0.770861	5.0054	5.57447e-07	1.30046e-05	TRUE	UP	ENSG00000133134.12		LXN-201	1.40306	4.0052	0.761246	5.26137	1.42987e-07	4.84775e-06	TRUE	UP	ENST00000264265.4
C3orf14	1.28049	3.83066	0.778052	4.9234	8.5054e-07	1.91262e-05	TRUE	UP	ENSG00000114405.11		CDS1-201	1.41713	4.00453	0.756597	5.29281	1.20448e-07	4.12788e-06	TRUE	UP	ENST00000295887.6
DZIP1	2.46123	3.82573	0.702698	5.44434	5.19981e-08	1.50726e-06	TRUE	UP	ENSG00000134874.18		SELENOP-214	1.40131	4.00273	0.753393	5.31295	1.07867e-07	3.72703e-06	TRUE	UP	ENST00000514985.6
MAFB	3.49668	3.80493	0.661506	5.75191	8.82397e-09	2.84254e-07	TRUE	UP	ENSG00000204103.4		TSC22D3-206	2.08198	3.99445	0.730503	5.46807	4.54955e-08	1.74344e-06	TRUE	UP	ENST00000372397.6
FGF13	1.2847	3.80224	0.774423	4.90978	9.11806e-07	2.03466e-05	TRUE	UP	ENSG00000129682.16		SLC16A10-202	1.34552	3.98074	0.763098	5.21655	1.82291e-07	6.00626e-06	TRUE	UP	ENST00000368851.10
DSC3	1.22054	3.79783	0.775036	4.9002	9.57371e-07	2.12007e-05	TRUE	UP	ENSG00000134762.17		MAFB-201	3.68	3.94129	0.659784	5.9736	2.32074e-09	1.14641e-07	TRUE	UP	ENST00000373313.3
GATA3	1.29035	3.7958	0.816724	4.64759	3.35836e-06	6.31502e-05	TRUE	UP	ENSG00000107485.18		SLIT2-202	1.73789	3.93002	0.737208	5.33095	9.76987e-08	3.41298e-06	TRUE	UP	ENST00000503823.5
PLAT	1.19982	3.76443	0.792928	4.74751	2.05938e-06	4.10994e-05	TRUE	UP	ENSG00000104368.19		FOXD1-202	1.26485	3.8841	0.783963	4.95444	7.25389e-07	2.09915e-05	TRUE	UP	ENST00000615637.3
LRCH2	1.23916	3.7581	0.795112	4.72651	2.28417e-06	4.50891e-05	TRUE	UP	ENSG00000130224.15		ENST00000431840	1.54942	3.8803	0.750142	5.17275	2.30672e-07	7.44151e-06	TRUE	UP	ENST00000431840.2
ERO1B	1.55697	3.75251	0.761863	4.92544	8.41691e-07	1.89761e-05	TRUE	UP	ENSG00000086619.15		SPEN-AS1-201	2.42803	3.8753	0.706938	5.48181	4.21003e-08	1.62814e-06	TRUE	UP	ENST00000317122.2
BCL11A	1.24168	3.75181	0.776382	4.83243	1.3488e-06	2.84258e-05	TRUE	UP	ENSG00000119866.22		ELP5-209	1.23578	3.86592	0.777184	4.97427	6.54952e-07	1.9217e-05	TRUE	UP	ENST00000573657.6
LXN	1.1977	3.73061	0.79185	4.71126	2.46188e-06	4.80534e-05	TRUE	UP	ENSG00000079257.8		HOXA9-201	4.26016	3.86493	0.620737	6.22636	4.77397e-10	2.68318e-08	TRUE	UP	ENST00000343483.7
ZNF703	7.47044	3.71622	0.462509	8.03491	9.36443e-16	7.56525e-14	TRUE	UP	ENSG00000183779.7		ZNF703-201	7.87739	3.85505	0.462597	8.33349	7.84927e-17	1.10291e-14	TRUE	UP	ENST00000331569.6
BCL7A	1.54909	3.71439	0.765252	4.85382	1.21107e-06	2.61548e-05	TRUE	UP	ENSG00000110987.9		EIF4A2-201	7.01053	3.839	0.486788	7.88639	3.11053e-15	3.48104e-13	TRUE	UP	ENST00000323963.10
MACROH2A2	1.408	3.70606	0.764663	4.84665	1.25563e-06	2.68513e-05	TRUE	UP	ENSG00000099284.15		HES4-203	1.54298	3.81663	0.746732	5.11111	3.20271e-07	1.0075e-05	TRUE	UP	ENST00000481869.1
TBX18	1.19936	3.69825	0.774399	4.77564	1.79135e-06	3.65176e-05	TRUE	UP	ENSG00000112837.17		GJA1-201	1.54223	3.80698	0.75302	5.05561	4.2901e-07	1.29791e-05	TRUE	UP	ENST00000282561.4
ZFYVE9	1.21297	3.68823	0.821383	4.49027	7.11314e-06	0.00011958	TRUE	UP	ENSG00000157077.16		CPE-201	2.39337	3.79986	0.866049	4.38758	1.14619e-05	0.000236842	TRUE	UP	ENST00000402744.9
SLFN11	1.51322	3.68419	0.759603	4.85014	1.23372e-06	2.65783e-05	TRUE	UP	ENSG00000172716.17		AMOT-201	2.74569	3.76165	0.688746	5.46159	4.7189e-08	1.80288e-06	TRUE	UP	ENST00000304758.5
TIAM1	1.41888	3.67965	0.766435	4.80099	1.57882e-06	3.24123e-05	TRUE	UP	ENSG00000156299.15		MAGED1-204	1.21885	3.75567	0.78258	4.79909	1.59392e-06	4.26145e-05	TRUE	UP	ENST00000375772.7
ARMCX4	1.44796	3.67582	0.753966	4.87532	1.08631e-06	2.36952e-05	TRUE	UP	ENSG00000196440.12		LRATD2-201	1.8214	3.75424	0.730508	5.13922	2.75882e-07	8.7879e-06	TRUE	UP	ENST00000304916.4
TARS3	1.45361	3.65869	0.748823	4.88592	1.02946e-06	2.26248e-05	TRUE	UP	ENSG00000185418.16		TSIX-201	28.046	3.71785	0.24203	15.3611	2.98564e-53	3.77564e-50	TRUE	UP	ENST00000604411.1
ZNF503	8.96026	3.65027	0.414841	8.79921	1.37778e-18	1.50264e-16	TRUE	UP	ENSG00000165655.17		GSTA4-203	1.39043	3.71671	0.757912	4.90388	9.39611e-07	2.6115e-05	TRUE	UP	ENST00000370963.9
ISYNA1	1.44497	3.64595	0.752068	4.8479	1.24777e-06	2.6749e-05	TRUE	UP	ENSG00000105655.19		BEX2-202	1.11311	3.7081	0.791734	4.68352	2.81995e-06	7.0616e-05	TRUE	UP	ENST00000372677.8
FAM120B	2.15104	3.63059	0.713269	5.09008	3.57919e-07	8.69872e-06	TRUE	UP	ENSG00000112584.14		DOCK3-201	1.40856	3.70236	0.753043	4.91654	8.80882e-07	2.46452e-05	TRUE	UP	ENST00000266037.10
MIR222HG	2.14662	3.61672	0.720344	5.02082	5.14509e-07	1.20675e-05	TRUE	UP	ENSG00000270069.3		TNC-202	1.82069	3.68013	0.73333	5.01838	5.21084e-07	1.56523e-05	TRUE	UP	ENST00000350763.9
CEP43	1.73784	3.60997	0.729654	4.94751	7.51689e-07	1.7124e-05	TRUE	UP	ENSG00000213066.14		ZNF503-201	12.6052	3.67261	0.348618	10.5348	5.97342e-26	1.98789e-23	TRUE	UP	ENST00000372524.5
FHIT	1.14797	3.56869	0.809934	4.40614	1.05228e-05	0.000167845	TRUE	UP	ENSG00000189283.10		NID1-201	1.79882	3.66176	0.73674	4.97023	6.68748e-07	1.95311e-05	TRUE	UP	ENST00000264187.7
TSC22D3	3.64275	3.55985	0.632588	5.62744	1.82908e-08	5.59956e-07	TRUE	UP	ENSG00000157514.18		SLIT2-203	1.09374	3.65865	0.794641	4.60416	4.1413e-06	9.89998e-05	TRUE	UP	ENST00000503837.5
CELF2	1.02114	3.53602	0.81844	4.32044	1.55721e-05	0.000233872	TRUE	UP	ENSG00000048740.19		HOXB3-205	1.09997	3.65206	1.16215	3.1425	0.00167514	0.0144589	TRUE	UP	ENST00000470495.1
LINC00632	1.30042	3.52875	0.781264	4.51673	6.28031e-06	0.000106606	TRUE	UP	ENSG00000203930.13		XIST-230	1.6343	3.62904	0.747985	4.85175	1.22374e-06	3.33523e-05	TRUE	UP	ENST00000669898.1
MYO6	2.98705	3.51423	0.674483	5.21026	1.88575e-07	4.83917e-06	TRUE	UP	ENSG00000196586.17		HSPA1A-202	14.0536	3.62598	0.326318	11.1118	1.09947e-28	4.48514e-26	TRUE	UP	ENST00000608703.1
EPHA6	0.978219	3.50321	0.82485	4.24709	2.16564e-05	0.00031492	TRUE	UP	ENSG00000080224.18		MYOM2-201	1.40001	3.62068	0.769674	4.70417	2.549e-06	6.48585e-05	TRUE	UP	ENST00000262113.9
SIMC1	1.59354	3.4946	0.740084	4.7219	2.33649e-06	4.58493e-05	TRUE	UP	ENSG00000170085.18		ELOVL4-201	1.29174	3.61587	0.772477	4.68087	2.85657e-06	7.12509e-05	TRUE	UP	ENST00000369816.5
SORT1	1.65983	3.48399	0.744111	4.68209	2.83969e-06	5.45732e-05	TRUE	UP	ENSG00000134243.12		ENST00000433510	1.05426	3.59727	0.802048	4.48511	7.28759e-06	0.000161682	TRUE	UP	ENST00000433510.2
H1-3	1.00191	3.47958	0.825013	4.21761	2.4691e-05	0.000350291	TRUE	UP	ENSG00000124575.7		H1-3-201	1.04972	3.59566	0.815568	4.40878	1.03954e-05	0.000217289	TRUE	UP	ENST00000244534.7
PCSK5	1.18178	3.47844	0.784576	4.43353	9.27024e-06	0.00015034	TRUE	UP	ENSG00000099139.14		MTURN-201	1.03571	3.59113	0.801038	4.4831	7.35678e-06	0.000162931	TRUE	UP	ENST00000324453.13
ADGRV1	1.25733	3.47815	0.788968	4.40849	1.04096e-05	0.000166817	TRUE	UP	ENSG00000164199.18		ZCCHC12-201	2.05848	3.57992	0.725774	4.93256	8.11584e-07	2.31155e-05	TRUE	UP	ENST00000310164.3
ZCCHC12	1.97132	3.46299	0.729482	4.7472	2.06257e-06	4.10994e-05	TRUE	UP	ENSG00000174460.4		RADX-204	1.00878	3.57651	0.805526	4.43996	8.9974e-06	0.000193177	TRUE	UP	ENST00000461251.5
MLF1	1.84374	3.46154	0.727355	4.75908	1.94478e-06	3.90073e-05	TRUE	UP	ENSG00000178053.21		RADX-201	2.41773	3.57352	0.704957	5.06913	3.99641e-07	1.22965e-05	TRUE	UP	ENST00000372544.6
MAP1B	1.56777	3.45943	0.773853	4.4704	7.80736e-06	0.000130247	TRUE	UP	ENSG00000131711.15		AKT3-217	1.27457	3.57292	0.778827	4.58756	4.48447e-06	0.000105606	TRUE	UP	ENST00000673466.1
KCNQ5	0.954251	3.45183	0.807756	4.27335	1.92554e-05	0.000284751	TRUE	UP	ENSG00000185760.18		SLIT2-201	1.01181	3.57078	0.809514	4.41102	1.02884e-05	0.000216126	TRUE	UP	ENST00000273739.9
TSIX	0.997747	3.45161	0.837753	4.12009	3.78731e-05	0.000492463	TRUE	UP	ENSG00000270641.2		ARMCX4-202	1.03747	3.55754	0.832158	4.27508	1.91071e-05	0.000368899	TRUE	UP	ENST00000423738.5
ELOVL4	1.20028	3.4458	0.783055	4.40045	1.08025e-05	0.000170939	TRUE	UP	ENSG00000118402.6		SKAP2-201	1.92537	3.55539	0.730063	4.86998	1.11608e-06	3.06826e-05	TRUE	UP	ENST00000345317.7
CPE	2.39403	3.44518	0.830819	4.14673	3.37257e-05	0.000447199	TRUE	UP	ENSG00000109472.14		COCH-214	0.998037	3.55533	0.826904	4.29957	1.71133e-05	0.000337094	TRUE	UP	ENST00000644874.2
SV2A	1.01253	3.42624	0.843794	4.06051	4.89649e-05	0.000612939	TRUE	UP	ENSG00000159164.10		MIR222HG-203	1.26223	3.53328	0.775348	4.55703	5.18814e-06	0.000119507	TRUE	UP	ENST00000688264.2
GGT7	1.26266	3.42014	0.773958	4.41902	9.91491e-06	0.000159608	TRUE	UP	ENSG00000131067.17		TLE1-203	1.98764	3.53318	0.722543	4.88992	1.00878e-06	2.7976e-05	TRUE	UP	ENST00000376499.8
ANKRD18A	2.34682	3.41854	0.696215	4.91018	9.09909e-07	2.03466e-05	TRUE	UP	ENSG00000180071.21		AASS-203	0.97552	3.52086	0.826421	4.26038	2.04084e-05	0.000391037	TRUE	UP	ENST00000417368.7
ANK2	1.5775	3.41718	0.748241	4.56695	4.94865e-06	8.61816e-05	TRUE	UP	ENSG00000145362.21		KCTD12-201	1.01358	3.51307	0.826613	4.24995	2.13817e-05	0.000407218	TRUE	UP	ENST00000377474.4
TLE1	2.32953	3.4162	0.696017	4.90822	9.19081e-07	2.04185e-05	TRUE	UP	ENSG00000196781.16		FOXG1-201	0.921947	3.50785	0.841543	4.16835	3.06813e-05	0.000553488	TRUE	UP	ENST00000313071.7
PCSK6	1.91268	3.40675	0.722291	4.71659	2.39834e-06	4.69183e-05	TRUE	UP	ENSG00000140479.18		PRSS12-201	1.00377	3.48647	0.825106	4.22548	2.38428e-05	0.000445909	TRUE	UP	ENST00000296498.3
AGPAT3	1.23869	3.40669	0.773689	4.40318	1.06676e-05	0.000169845	TRUE	UP	ENSG00000160216.21		TET1-201	1.20019	3.48363	0.790501	4.40686	1.0488e-05	0.000218864	TRUE	UP	ENST00000373644.5
KCTD12	0.967701	3.39785	0.835546	4.06663	4.76986e-05	0.000599669	TRUE	UP	ENSG00000178695.6		ZNF503-AS2-201	1.25598	3.47774	0.776444	4.47906	7.49734e-06	0.000165465	TRUE	UP	ENST00000425916.4
TUBA1A	1.9661	3.39714	0.730556	4.65007	3.31818e-06	6.25294e-05	TRUE	UP	ENSG00000167552.15		MAP1B-201	1.49302	3.46167	0.776973	4.45533	8.37648e-06	0.000182008	TRUE	UP	ENST00000296755.12
ZNF608	0.928096	3.39443	0.83302	4.07484	4.60452e-05	0.000583931	TRUE	UP	ENSG00000168916.16		QPCT-201	1.00959	3.4576	0.824043	4.1959	2.71796e-05	0.000497413	TRUE	UP	ENST00000338415.8
PDPN	0.942812	3.37661	0.833489	4.05118	5.09603e-05	0.000632473	TRUE	UP	ENSG00000162493.17		SV2A-202	0.97719	3.45468	1.06215	3.25254	0.0011438	0.0106907	TRUE	UP	ENST00000369146.8
TET1	1.14272	3.36268	0.799027	4.20847	2.57111e-05	0.000362406	TRUE	UP	ENSG00000138336.9		MAN1A1-201	2.34358	3.44697	0.698129	4.93745	7.91522e-07	2.2749e-05	TRUE	UP	ENST00000368468.4
ARL10	0.949884	3.36252	0.825727	4.07219	4.65731e-05	0.000588913	TRUE	UP	ENSG00000175414.7		LINC00342-206	1.55567	3.44317	0.751816	4.5798	4.65417e-06	0.000108543	TRUE	UP	ENST00000660416.1
CCDC8	1.19952	3.36211	0.793856	4.23517	2.28383e-05	0.000329362	TRUE	UP	ENSG00000169515.9		TBX18-202	0.991928	3.44308	0.817236	4.21308	2.51917e-05	0.000466777	TRUE	UP	ENST00000369663.10
VPS35L	1.45634	3.36157	0.763943	4.40029	1.08108e-05	0.000170939	TRUE	UP	ENSG00000103544.17		MAGEH1-201	0.962053	3.42085	0.827026	4.13633	3.52906e-05	0.000621105	TRUE	UP	ENST00000342972.3
RNF128	1.47938	3.36009	0.749054	4.48578	7.26472e-06	0.000121894	TRUE	UP	ENSG00000133135.14		SMO-201	0.94643	3.4153	0.827768	4.12592	3.69257e-05	0.000640553	TRUE	UP	ENST00000249373.8
QPCT	0.966566	3.34468	0.830696	4.02635	5.66483e-05	0.000688379	TRUE	UP	ENSG00000115828.17		CLEC11A-201	0.879327	3.4125	0.866298	3.93918	8.17603e-05	0.00126708	TRUE	UP	ENST00000250340.9
RASEF	0.852648	3.33212	0.846218	3.93766	8.22817e-05	0.000932347	TRUE	UP	ENSG00000165105.10		GTF2H2-210	1.81322	3.41171	0.726007	4.69928	2.61083e-06	6.6033e-05	TRUE	UP	ENST00000521942.5
POU3F3	0.949246	3.32509	0.846234	3.92928	8.51988e-05	0.000955475	TRUE	UP	ENSG00000198914.5		ENST00000520085	0.963356	3.40132	0.866127	3.92705	8.59949e-05	0.0013134	TRUE	UP	ENST00000520085.2
HEBP2	3.1744	3.31752	0.636047	5.21584	1.82986e-07	4.72352e-06	TRUE	UP	ENSG00000051620.11		RASEF-202	0.860908	3.38742	0.850393	3.98335	6.79491e-05	0.0010768	TRUE	UP	ENST00000376447.4
MYO5C	0.925974	3.30933	0.825922	4.00683	6.15396e-05	0.000736534	TRUE	UP	ENSG00000128833.13		HEBP2-204	3.19269	3.38709	0.636395	5.32232	1.02455e-07	3.56926e-06	TRUE	UP	ENST00000607197.6
MAGEH1	0.917114	3.30417	0.830907	3.97659	6.99114e-05	0.000822071	TRUE	UP	ENSG00000187601.5		NMU-201	0.901465	3.386	0.837116	4.04484	5.23598e-05	0.000855481	TRUE	UP	ENST00000264218.7
SKAP2	2.06685	3.30246	0.718038	4.59928	4.23956e-06	7.58528e-05	TRUE	UP	ENSG00000005020.13		GATA3-202	0.920025	3.38522	1.19703	2.82801	0.00468383	0.0315566	TRUE	UP	ENST00000379328.9
NRIP3	0.906193	3.29625	0.835705	3.94428	8.00411e-05	0.000909321	TRUE	UP	ENSG00000175352.12		QKI-204	1.41154	3.38408	0.756695	4.47219	7.74228e-06	0.000170222	TRUE	UP	ENST00000361758.8
BCAS3	1.10509	3.29622	0.822002	4.00999	6.07208e-05	0.000729736	TRUE	UP	ENSG00000141376.23		ANKRD18A-210	2.19656	3.37313	0.706018	4.77769	1.77324e-06	4.6815e-05	TRUE	UP	ENST00000703205.1
STX7	2.0929	3.28431	0.711979	4.61293	3.97038e-06	7.23205e-05	TRUE	UP	ENSG00000079950.14		LINC02754-201	1.45169	3.36419	0.762281	4.41333	1.01794e-05	0.000214547	TRUE	UP	ENST00000511677.1
RRAGD	0.875799	3.27635	0.922405	3.55196	0.000382375	0.00335636	TRUE	UP	ENSG00000025039.15		AFDN-223	0.923145	3.36156	0.869359	3.86671	0.000110312	0.00160518	TRUE	UP	ENST00000683244.1
ZNF430	2.1152	3.27541	0.708544	4.62273	3.78717e-06	6.97111e-05	TRUE	UP	ENSG00000118620.13		NSMCE3-201	1.81206	3.36111	0.738129	4.55355	5.27474e-06	0.000121061	TRUE	UP	ENST00000332303.6
TUBB2B	0.879863	3.27148	0.863899	3.78688	0.000152551	0.00155492	TRUE	UP	ENSG00000137285.11		ECHDC2-222	1.73147	3.34495	0.735418	4.54837	5.40632e-06	0.000123632	TRUE	UP	ENST00000539680.1
TBC1D8B	0.87111	3.26889	0.859107	3.80499	0.00014181	0.00146079	TRUE	UP	ENSG00000133138.20		IGFBP5-201	0.910647	3.34081	0.856255	3.90166	9.55368e-05	0.00143657	TRUE	UP	ENST00000233813.5
SLC44A5	0.909078	3.26614	0.849293	3.84572	0.000120199	0.00126658	TRUE	UP	ENSG00000137968.17		LRCH2-201	0.891036	3.34075	0.865018	3.86206	0.000112436	0.00162684	TRUE	UP	ENST00000317135.13
DPYSL3	0.854154	3.25958	0.889404	3.6649	0.000247434	0.0023517	TRUE	UP	ENSG00000113657.13		MDK-203	0.842829	3.33857	0.859365	3.88493	0.00010236	0.00152109	TRUE	UP	ENST00000395566.9
FRAS1	0.892197	3.25902	0.850832	3.8304	0.000127937	0.00133204	TRUE	UP	ENSG00000138759.20		XIST-206	0.875699	3.32705	0.854264	3.89464	9.83433e-05	0.0014683	TRUE	UP	ENST00000434839.3
HSPA1A	54.0986	3.25035	0.156599	20.7559	1.08436e-95	2.36525e-92	TRUE	UP	ENSG00000204389.10		COCH-202	0.879681	3.32594	0.849361	3.91581	9.01011e-05	0.00136699	TRUE	UP	ENST00000396618.9
NSMCE3	1.74295	3.248	0.742708	4.37318	1.22447e-05	0.000189875	TRUE	UP	ENSG00000185115.6		RNF128-201	1.39723	3.32483	0.757421	4.38967	1.13521e-05	0.000234957	TRUE	UP	ENST00000255499.3
DAPK1	0.841775	3.24394	0.867203	3.7407	0.000183512	0.00181329	TRUE	UP	ENSG00000196730.13		ENST00000608760	1.05003	3.31417	0.817971	4.0517	5.08466e-05	0.000836159	TRUE	UP	ENST00000608760.3
HACE1	1.05982	3.23892	0.80179	4.03962	5.35382e-05	0.000658844	TRUE	UP	ENSG00000085382.12		GARRE1-201	1.11642	3.30789	0.806877	4.09962	4.13825e-05	0.000704338	TRUE	UP	ENST00000299505.8
TNRC6C	1.06551	3.23764	0.793616	4.0796	4.51135e-05	0.000572948	TRUE	UP	ENSG00000078687.18		CLDND1-201	1.64721	3.30613	0.749198	4.41289	1.01998e-05	0.000214619	TRUE	UP	ENST00000341181.11
SH3GL3	0.822322	3.23476	0.860306	3.76001	0.000169904	0.00170589	TRUE	UP	ENSG00000140600.17		TARS3-201	1.06678	3.29911	0.797632	4.13614	3.53201e-05	0.000621105	TRUE	UP	ENST00000335968.8
LRATD2	1.04558	3.22982	0.829355	3.89438	9.84521e-05	0.00106707	TRUE	UP	ENSG00000168672.4		FAM120B-201	1.27418	3.29755	0.782646	4.21334	2.51622e-05	0.000466777	TRUE	UP	ENST00000476287.4
CLEC11A	0.794243	3.21482	0.890899	3.60851	0.000307958	0.00280181	TRUE	UP	ENSG00000105472.14		H1-0-201	1.30513	3.29727	0.774381	4.25794	2.0632e-05	0.000394128	TRUE	UP	ENST00000340857.4
NRP1	1.27839	3.2143	0.771296	4.16741	3.08085e-05	0.000422648	TRUE	UP	ENSG00000099250.18		PRRC2B-208	2.15593	3.29125	0.708196	4.64737	3.36187e-06	8.25518e-05	TRUE	UP	ENST00000684596.1
NMU	0.823617	3.19522	0.850195	3.75822	0.000171124	0.00171418	TRUE	UP	ENSG00000109255.11		GGT7-201	1.11307	3.28406	0.800163	4.10424	4.05654e-05	0.000694169	TRUE	UP	ENST00000336431.10
DLEU2	1.03873	3.19229	0.798997	3.99537	6.45938e-05	0.000767821	TRUE	UP	ENSG00000231607.15		GABPA-201	1.59972	3.28294	0.742352	4.42235	9.76333e-06	0.000207508	TRUE	UP	ENST00000354828.7
TLE4	1.97514	3.19108	0.723885	4.40827	1.04201e-05	0.000166817	TRUE	UP	ENSG00000106829.21		MACROH2A2-201	0.832627	3.28202	0.848018	3.87023	0.000108734	0.00158513	TRUE	UP	ENST00000373255.9
STEAP1	0.818051	3.19011	0.83733	3.80986	0.000139048	0.00143914	TRUE	UP	ENSG00000164647.9		HES4-202	1.03778	3.27826	0.820351	3.99616	6.43775e-05	0.00102534	TRUE	UP	ENST00000428771.6
ZNF618	2.10511	3.18877	0.729537	4.37095	1.23704e-05	0.000191369	TRUE	UP	ENSG00000157657.15		NRARP-201	2.9131	3.26906	0.640648	5.10273	3.34785e-07	1.05054e-05	TRUE	UP	ENST00000356628.4
NINL	0.815682	3.18609	0.844325	3.77354	0.000160948	0.0016272	TRUE	UP	ENSG00000101004.16		HECA-201	0.855077	3.26866	0.866852	3.77072	0.000162777	0.00222059	TRUE	UP	ENST00000367658.3
NIPAL1	0.801776	3.17276	0.865467	3.66595	0.000246419	0.00234461	TRUE	UP	ENSG00000163293.12		FAN1-222	1.07129	3.26832	0.805618	4.05691	4.97256e-05	0.000819856	TRUE	UP	ENST00000665705.1
ZNF620	1.08069	3.17158	0.809702	3.91697	8.96692e-05	0.000992847	TRUE	UP	ENSG00000177842.12		ENST00000656340	0.864757	3.26748	0.845876	3.86283	0.000112081	0.00162357	TRUE	UP	ENST00000656340.1
REPS1	1.53117	3.16962	0.754442	4.20128	2.65413e-05	0.000372304	TRUE	UP	ENSG00000135597.19		ST20-AS1-201	1.3105	3.25627	0.770233	4.22764	2.36154e-05	0.000442431	TRUE	UP	ENST00000560255.2
JUN	6.32873	3.1684	0.450392	7.03476	1.99611e-12	1.12362e-10	TRUE	UP	ENSG00000177606.8		HES4-201	1.29456	3.25324	0.791091	4.11234	3.91666e-05	0.000674797	TRUE	UP	ENST00000304952.11
ZNF100	0.779743	3.16578	0.897093	3.52893	0.000417243	0.0036044	TRUE	UP	ENSG00000197020.12		BRMS1L-201	1.97071	3.24689	0.720362	4.50731	6.56558e-06	0.000147213	TRUE	UP	ENST00000216807.12
MAGED4B	0.791526	3.1641	0.897716	3.52461	0.000424105	0.00364563	TRUE	UP	ENSG00000187243.17		FAM171A1-201	0.78823	3.24379	0.887471	3.65509	0.000257093	0.00326098	TRUE	UP	ENST00000378116.9
SNORD3B-2	1.01224	3.16042	0.800744	3.94685	7.91857e-05	0.000905499	TRUE	UP	ENSG00000262074.7		FOXG1-202	0.828581	3.24375	0.883346	3.67212	0.000240547	0.00307268	TRUE	UP	ENST00000706482.1
EPHA3	1.0915	3.1396	0.818084	3.83775	0.000124168	0.00130212	TRUE	UP	ENSG00000044524.11		ENST00000656264	0.822911	3.24165	0.876905	3.6967	0.000218423	0.00284467	TRUE	UP	ENST00000656264.1
MCOLN3	1.27376	3.13081	0.776323	4.03288	5.50985e-05	0.000673298	TRUE	UP	ENSG00000055732.13		HMGA2-204	1.02859	3.2342	0.823413	3.9278	8.57278e-05	0.0013109	TRUE	UP	ENST00000403681.7
FAM171A1	0.751268	3.12505	0.891385	3.50583	0.000455182	0.00387082	TRUE	UP	ENSG00000148468.17		AGPAT3-201	0.818219	3.22895	0.874501	3.69234	0.000222202	0.00287612	TRUE	UP	ENST00000291572.13
ABCB1	0.743547	3.12479	0.887156	3.52225	0.000427893	0.00367457	TRUE	UP	ENSG00000085563.15		FHL1-204	1.58945	3.22506	0.742796	4.34179	1.41326e-05	0.000284911	TRUE	UP	ENST00000394153.6
MARVELD2	0.795091	3.12258	0.861125	3.62616	0.000287664	0.00265595	TRUE	UP	ENSG00000152939.17		ZFHX4-214	0.820531	3.214	0.914201	3.51564	0.000438698	0.00503885	TRUE	UP	ENST00000651372.2
SLC16A4	1.28629	3.12242	0.793617	3.93442	8.33984e-05	0.000940117	TRUE	UP	ENSG00000168679.18		HSPA1A-201	44.2093	3.20458	0.167873	19.0893	3.09807e-81	7.83563e-78	TRUE	UP	ENST00000375651.7
WHAMM	1.60561	3.11696	0.750752	4.15178	3.29893e-05	0.000441932	TRUE	UP	ENSG00000156232.7		POU4F1-201	0.750946	3.20175	0.902622	3.54717	0.000389398	0.00457659	TRUE	UP	ENST00000377208.7
GABPA	0.996731	3.11352	0.819117	3.80107	0.000144074	0.00147888	TRUE	UP	ENSG00000154727.11		MAP3K4-AS1-201	0.979811	3.19974	0.821495	3.89502	9.81914e-05	0.0014683	TRUE	UP	ENST00000608721.1
HOOK1	0.772625	3.11324	0.859426	3.62247	0.000291805	0.00268282	TRUE	UP	ENSG00000134709.13		PPIG-214	0.780449	3.19682	0.917734	3.48338	0.000495125	0.00553611	TRUE	UP	ENST00000677392.1
PLXNA2	0.985617	3.10304	0.811013	3.82613	0.000130172	0.00135048	TRUE	UP	ENSG00000076356.7		ID2-201	2.32547	3.1944	0.684873	4.66422	3.09789e-06	7.66653e-05	TRUE	UP	ENST00000234091.8
TSHZ3	0.762204	3.10258	0.947991	3.2728	0.00106489	0.00764074	TRUE	UP	ENSG00000121297.8		RNF103-201	1.30732	3.19215	0.772464	4.13242	3.58967e-05	0.000628739	TRUE	UP	ENST00000237455.5
IRS4-AS1	0.783519	3.09698	0.957918	3.23304	0.00122482	0.00854926	TRUE	UP	ENSG00000237863.3		NIPAL3-204	0.818848	3.19096	0.863779	3.69418	0.000220597	0.00286414	TRUE	UP	ENST00000374399.9
EFL1	0.797864	3.09297	0.872488	3.545	0.00039261	0.0034221	TRUE	UP	ENSG00000140598.16		SPEN-202	5.93695	3.18798	0.444203	7.17685	7.13335e-13	6.13662e-11	TRUE	UP	ENST00000438066.2
MED23	1.9773	3.08632	0.713811	4.32372	1.5342e-05	0.000231189	TRUE	UP	ENSG00000112282.18		GALNT13-201	0.800099	3.1755	0.903058	3.51638	0.000437469	0.00502931	TRUE	UP	ENST00000392825.8
SYNE1	1.59141	3.08601	0.744025	4.14772	3.35804e-05	0.00044663	TRUE	UP	ENSG00000131018.25		SLC2A11-216	1.29901	3.16541	0.778315	4.06701	4.76211e-05	0.000796583	TRUE	UP	ENST00000473357.1
ENSG00000277701	0.999901	3.08291	0.808558	3.81285	0.000137372	0.00142348	TRUE	UP	ENSG00000277701.5		HOXD11-202	0.745799	3.1565	0.91193	3.46134	0.000537493	0.00589518	TRUE	UP	ENST00000498438.1
ZNF302	1.51624	3.07353	0.743764	4.13239	3.59004e-05	0.000470317	TRUE	UP	ENSG00000089335.22		MTR-211	1.53576	3.15646	0.751321	4.20121	2.65491e-05	0.000488705	TRUE	UP	ENST00000679569.1
H1-0	1.17475	3.07348	0.789122	3.89481	9.82746e-05	0.00106707	TRUE	UP	ENSG00000189060.6		POU3F3-201	0.836858	3.15603	0.903571	3.49284	0.000477911	0.00538171	TRUE	UP	ENST00000361360.4
ENSG00000289810	1.02374	3.07243	0.859247	3.57572	0.000349265	0.00312548	TRUE	UP	ENSG00000289810.1		STC1-201	0.784947	3.14904	0.88847	3.54434	0.00039359	0.0046172	TRUE	UP	ENST00000290271.7
ENSG00000253123	0.758281	3.05924	0.934648	3.27315	0.00106357	0.00763758	TRUE	UP	ENSG00000253123.4		JUN-201	5.55769	3.14641	0.464961	6.76704	1.31445e-11	9.83585e-10	TRUE	UP	ENST00000371222.4
GALNT13	0.757922	3.055	0.914088	3.34213	0.000831371	0.00626942	TRUE	UP	ENSG00000144278.15		PKD2-201	2.33943	3.14401	0.69117	4.54882	5.3947e-06	0.00012359	TRUE	UP	ENST00000237596.7
DUSP8	0.962153	3.05321	0.826271	3.69517	0.000219743	0.00213029	TRUE	UP	ENSG00000184545.11		NDRG1-201	0.916388	3.1425	0.862229	3.64462	0.000267788	0.00335624	TRUE	UP	ENST00000323851.13
PKD2	2.26677	3.05054	0.69214	4.4074	1.04616e-05	0.000167176	TRUE	UP	ENSG00000118762.8		SNHG5-225	5.05105	3.14033	0.482005	6.51514	7.26195e-11	4.68544e-09	TRUE	UP	ENST00000654795.1
GABBR1	0.749691	3.04876	0.931137	3.27423	0.0010595	0.00762091	TRUE	UP	ENSG00000204681.11		JUN-202	1.0133	3.13838	0.847434	3.70339	0.000212741	0.0027879	TRUE	UP	ENST00000678696.1
ZSWIM9	1.15361	3.044	0.77994	3.90286	9.50614e-05	0.00104279	TRUE	UP	ENSG00000185453.13		AGO3-207	0.763281	3.13658	0.905769	3.4629	0.000534391	0.00586624	TRUE	UP	ENST00000634486.1
SIX1	1.86165	3.03945	0.726779	4.18209	2.88841e-05	0.000401936	TRUE	UP	ENSG00000126778.12		CDO1-201	0.750177	3.13566	0.919629	3.4097	0.000650342	0.00684781	TRUE	UP	ENST00000250535.5
STC1	0.751424	3.03361	0.88988	3.40901	0.000651996	0.00518566	TRUE	UP	ENSG00000159167.12		SP9-201	0.794896	3.12282	0.88858	3.51439	0.000440763	0.00505324	TRUE	UP	ENST00000394967.3
ZBTB10	0.899935	3.02842	0.864767	3.502	0.000461778	0.00390408	TRUE	UP	ENSG00000205189.12		IGF2BP2-202	1.90242	3.12021	0.723906	4.31024	1.6308e-05	0.000324263	TRUE	UP	ENST00000382199.7
PSG4	0.733206	3.02613	0.909514	3.3272	0.000877244	0.00656992	TRUE	UP	ENSG00000243137.8		DIPK1B-202	0.715149	3.11857	0.940607	3.31549	0.00091484	0.00890199	TRUE	UP	ENST00000371692.9
VCAN	0.732273	3.02246	0.890907	3.39256	0.000692421	0.00544268	TRUE	UP	ENSG00000038427.16		NRP1-206	0.744703	3.11717	0.910507	3.42356	0.000618069	0.00658141	TRUE	UP	ENST00000374867.7
CMTM3	0.7177	3.01986	0.881317	3.42653	0.000611343	0.00491157	TRUE	UP	ENSG00000140931.20		MYH10-229	0.783365	3.1159	0.935515	3.33068	0.000866343	0.00859276	TRUE	UP	ENST00000692526.1
ARMCX2	0.731948	3.01817	0.927835	3.25292	0.00114225	0.0080763	TRUE	UP	ENSG00000184867.14		ENST00000634862	0.966496	3.11287	0.829557	3.75245	0.000175118	0.00235089	TRUE	UP	ENST00000634862.1
TRO	1.16585	3.01183	0.803112	3.7502	0.000176694	0.00175387	TRUE	UP	ENSG00000067445.22		PLPP6-201	0.736514	3.10963	0.934266	3.32842	0.000873407	0.00863573	TRUE	UP	ENST00000381883.5
MSX2	2.56774	2.99044	0.656108	4.55786	5.16785e-06	8.94846e-05	TRUE	UP	ENSG00000120149.9		HOXA10-202	0.777539	3.10677	0.891981	3.48299	0.000495838	0.00553919	TRUE	UP	ENST00000396344.4
HOXB3	0.902405	2.98609	0.852442	3.50298	0.000460077	0.00389347	TRUE	UP	ENSG00000120093.12		DSC3-202	0.731051	3.10316	0.925604	3.35258	0.00080061	0.00806092	TRUE	UP	ENST00000434452.5
ENSG00000291068	1.09982	2.98044	0.788849	3.77821	0.000157961	0.0016007	TRUE	UP	ENSG00000291068.1		NIPAL1-201	0.93308	3.09217	0.836128	3.6982	0.000217135	0.00283082	TRUE	UP	ENST00000295461.10
CHRNA7	0.729918	2.9799	0.936631	3.18151	0.0014651	0.00987107	TRUE	UP	ENSG00000175344.19		STX7-202	2.10735	3.0857	0.691752	4.46071	8.16898e-06	0.000178061	TRUE	UP	ENST00000367941.7
SEPTIN8	1.41748	2.97885	0.759867	3.92022	8.84692e-05	0.000986682	TRUE	UP	ENSG00000164402.14		BCL7A-201	0.959877	3.08343	0.83494	3.693	0.000221622	0.00287156	TRUE	UP	ENST00000261822.5
SRSF12	0.71695	2.97387	0.93227	3.18992	0.00142311	0.00965524	TRUE	UP	ENSG00000154548.9		HOXA13-202	1.23825	3.07882	0.782979	3.93218	8.41776e-05	0.00129361	TRUE	UP	ENST00000649031.1
MAGI2-AS3	0.716003	2.964	0.923273	3.21032	0.00132587	0.00911506	TRUE	UP	ENSG00000234456.10		MAGED1-203	0.743856	3.07841	0.899787	3.42127	0.000623303	0.00661822	TRUE	UP	ENST00000375722.5
PRKD1	0.690676	2.9543	0.962003	3.07098	0.00213355	0.0133443	TRUE	UP	ENSG00000184304.17		ENST00000623860	1.41759	3.07569	0.752323	4.08826	4.3462e-05	0.000733805	TRUE	UP	ENST00000623860.3
CADPS2	0.924303	2.94795	0.845116	3.48822	0.000486247	0.00409904	TRUE	UP	ENSG00000081803.17		SRCAP-202	1.81734	3.07034	0.71948	4.26744	1.97726e-05	0.000381165	TRUE	UP	ENST00000411466.7
TCTN1	0.670172	2.94155	1.01523	2.89741	0.00376252	0.0210166	TRUE	UP	ENSG00000204852.17		EPHA6-202	0.693556	3.06612	0.963755	3.18143	0.00146552	0.0130218	TRUE	UP	ENST00000470610.6
GSPT2	0.691256	2.94088	0.951608	3.09043	0.00199868	0.0126641	TRUE	UP	ENSG00000189369.9		ERO1B-202	0.96947	3.06603	0.841468	3.64366	0.000268784	0.00335874	TRUE	UP	ENST00000354619.10
FYCO1	0.915003	2.93952	0.861031	3.41395	0.00064028	0.00511111	TRUE	UP	ENSG00000163820.16		C3orf14-202	0.724264	3.06503	0.923564	3.3187	0.000904365	0.00885186	TRUE	UP	ENST00000462069.6
C21orf58	1.68817	2.93764	0.724866	4.05267	5.06369e-05	0.000629354	TRUE	UP	ENSG00000160298.18		CREB5-213	0.695633	3.06303	0.993849	3.08199	0.00205624	0.0168944	TRUE	UP	ENST00000482692.1
DLX2	3.28477	2.93696	0.569851	5.15391	2.55109e-07	6.33943e-06	TRUE	UP	ENSG00000115844.11		BRD2-207	0.931753	3.06176	0.87818	3.48649	0.000489409	0.00548676	TRUE	UP	ENST00000463639.2
CCNJ	0.683188	2.93684	0.998631	2.94087	0.00327296	0.0188616	TRUE	UP	ENSG00000107443.16		GSPT2-201	0.716962	3.05042	0.945816	3.22517	0.00125897	0.0115753	TRUE	UP	ENST00000340438.6
HLA-DPA1	0.691562	2.93617	0.923169	3.18054	0.00147002	0.0098889	TRUE	UP	ENSG00000231389.8		ENPEP-201	0.92156	3.04063	0.851564	3.57064	0.000356111	0.00424137	TRUE	UP	ENST00000265162.10
SERAC1	0.893712	2.92824	0.83541	3.50515	0.000456345	0.00387694	TRUE	UP	ENSG00000122335.17		PRPF31-203	0.936051	3.03804	0.821903	3.69635	0.000218723	0.00284566	TRUE	UP	ENST00000419967.5
SMAD9	0.883419	2.92337	0.845146	3.45902	0.000542152	0.00445832	TRUE	UP	ENSG00000120693.14		FTX-213	1.54001	3.03779	0.76389	3.97673	6.98681e-05	0.00110169	TRUE	UP	ENST00000638232.1
TSGA10	1.10236	2.90631	0.784615	3.70413	0.000212121	0.00206558	TRUE	UP	ENSG00000135951.16		PARP2-201	0.73693	3.03763	0.941244	3.22724	0.00124988	0.0115204	TRUE	UP	ENST00000250416.9
TMEM98	0.643502	2.9031	1.047	2.77277	0.00555813	0.0286442	TRUE	UP	ENSG00000006042.12		TMEFF1-201	0.708512	3.03635	0.980728	3.09602	0.00196136	0.016222	TRUE	UP	ENST00000374879.5
CDO1	0.652827	2.903	0.985878	2.94459	0.00323387	0.0186611	TRUE	UP	ENSG00000129596.5		DLX2-201	3.37031	3.03519	0.570953	5.31601	1.0607e-07	3.67496e-06	TRUE	UP	ENST00000234198.9
NELL2	1.12674	2.90016	0.822559	3.52578	0.000422235	0.00363314	TRUE	UP	ENSG00000184613.11		ZNF358-202	1.15906	3.024	0.800188	3.77912	0.000157386	0.00215453	TRUE	UP	ENST00000597229.2
ZNF37BP	1.36571	2.90015	0.761834	3.80679	0.00014078	0.00145534	TRUE	UP	ENSG00000234420.9		ENST00000607735	0.664229	3.02386	0.975415	3.10008	0.0019347	0.0160962	TRUE	UP	ENST00000607735.2
LEF1	0.683022	2.89571	0.93059	3.11169	0.00186019	0.0120134	TRUE	UP	ENSG00000138795.10		ANKRD18A-201	0.970191	3.02189	0.85284	3.54333	0.000395108	0.00462643	TRUE	UP	ENST00000399703.6
MYH10	4.50478	2.87926	0.491359	5.85978	4.63477e-09	1.61753e-07	TRUE	UP	ENSG00000133026.14		STK11-201	0.688514	3.01057	0.936504	3.21469	0.00130585	0.0118886	TRUE	UP	ENST00000326873.12
MCUB	1.1039	2.87556	0.825627	3.48287	0.000496063	0.0041615	TRUE	UP	ENSG00000005059.16		AFF1-211	0.725773	3.00712	0.939762	3.19988	0.00137485	0.0123747	TRUE	UP	ENST00000544085.6
PTK7	1.08337	2.87343	0.837034	3.43288	0.000597212	0.00481578	TRUE	UP	ENSG00000112655.16		STX12-201	1.30981	3.00686	0.768261	3.91386	9.08341e-05	0.00137136	TRUE	UP	ENST00000373943.9
HOXC4	1.27061	2.87211	0.768059	3.73944	0.000184432	0.00182033	TRUE	UP	ENSG00000198353.8		HOXB9-201	0.891566	3.00444	0.848657	3.54023	0.000399773	0.00466807	TRUE	UP	ENST00000311177.7
KAZN	0.665593	2.86905	0.949057	3.02305	0.0025024	0.0151097	TRUE	UP	ENSG00000189337.17		AP1S2-201	4.10665	3.00323	0.512869	5.85574	4.74903e-09	2.15255e-07	TRUE	UP	ENST00000329235.6
PEX1	0.84742	2.86511	0.863445	3.31823	0.000905887	0.00674715	TRUE	UP	ENSG00000127980.16		MAZ-214	2.8191	2.99907	0.608539	4.92832	8.29407e-07	2.35172e-05	TRUE	UP	ENST00000568544.5
ARHGEF26	1.11603	2.86365	0.799598	3.58136	0.000341812	0.00306822	TRUE	UP	ENSG00000114790.13		HOXC4-202	1.32441	2.99181	0.764436	3.91375	9.08748e-05	0.00137136	TRUE	UP	ENST00000430889.3
FSD1	0.839983	2.85956	0.865007	3.30582	0.000946976	0.00696071	TRUE	UP	ENSG00000105255.11		PTPN9-205	1.38035	2.98794	0.763128	3.91538	9.02604e-05	0.00136699	TRUE	UP	ENST00000618819.5
CIR1	1.09551	2.85865	0.790903	3.61442	0.000301024	0.002749	TRUE	UP	ENSG00000138433.16		MRPL39-201	0.663969	2.9865	0.979391	3.04934	0.00229341	0.0184026	TRUE	UP	ENST00000307301.11
PHLPP2	0.654689	2.85645	0.976214	2.92605	0.0034329	0.0195893	TRUE	UP	ENSG00000040199.18		FBXO8-201	0.86308	2.98638	0.850768	3.51021	0.000447745	0.00511027	TRUE	UP	ENST00000393674.7
FBRS	2.26593	2.85383	0.66526	4.2898	1.78837e-05	0.000265367	TRUE	UP	ENSG00000156860.16		SRSF12-201	0.696956	2.98635	0.946924	3.15374	0.00161193	0.0140776	TRUE	UP	ENST00000452027.3
LYST	0.651148	2.84908	0.943744	3.01891	0.00253686	0.0152544	TRUE	UP	ENSG00000143669.16		FOXO3-201	1.74531	2.98551	0.730177	4.08875	4.33699e-05	0.000733805	TRUE	UP	ENST00000343882.10
MYO3A	0.661158	2.84824	0.921242	3.09174	0.00198984	0.0126293	TRUE	UP	ENSG00000095777.17		CALM3-205	1.42866	2.98484	0.759818	3.92836	8.55286e-05	0.00131009	TRUE	UP	ENST00000486500.1
PPM1K	0.841449	2.84745	0.871571	3.26703	0.00108682	0.00777256	TRUE	UP	ENSG00000163644.15		ZNF512B-201	1.71688	2.98441	0.725367	4.11434	3.88289e-05	0.000670806	TRUE	UP	ENST00000369888.6
ZNF771	1.62219	2.84726	0.733372	3.88243	0.000103418	0.00111536	TRUE	UP	ENSG00000179965.12		LRRC41-207	2.07546	2.9807	0.704502	4.23093	2.32728e-05	0.000437307	TRUE	UP	ENST00000617190.5
FAM118A	1.30334	2.84552	0.768058	3.70482	0.000211537	0.00206219	TRUE	UP	ENSG00000100376.12		USP11-201	1.34454	2.97956	0.76349	3.90256	9.51824e-05	0.00143295	TRUE	UP	ENST00000218348.7
STRN4	1.04628	2.83951	0.799187	3.553	0.000380866	0.00334649	TRUE	UP	ENSG00000090372.15		SLC16A1-202	0.686125	2.97622	0.944675	3.15053	0.00162977	0.0141943	TRUE	UP	ENST00000429288.2
MED30	1.30976	2.83518	0.768433	3.68957	0.000224636	0.00217049	TRUE	UP	ENSG00000164758.7		HOXB2-201	1.06251	2.97442	0.799981	3.71811	0.000200715	0.00264952	TRUE	UP	ENST00000330070.6
GPR137B	0.637303	2.8343	0.996262	2.84493	0.00444207	0.0240192	TRUE	UP	ENSG00000077585.14		ZFYVE9-201	0.690112	2.97322	0.973722	3.05346	0.00226221	0.0182087	TRUE	UP	ENST00000287727.8
STEAP2	0.663751	2.82841	1.00075	2.8263	0.00470896	0.0251905	TRUE	UP	ENSG00000157214.14		F2RL1-201	0.688426	2.97316	0.943248	3.15205	0.0016213	0.0141497	TRUE	UP	ENST00000296677.5
MOXD1	0.807912	2.82474	0.916886	3.08079	0.00206451	0.0130057	TRUE	UP	ENSG00000079931.15		AEN-201	1.69228	2.97183	0.72939	4.07441	4.61319e-05	0.000774746	TRUE	UP	ENST00000332810.4
LINC00205	0.800174	2.81911	0.851862	3.30935	0.000935113	0.00692015	TRUE	UP	ENSG00000223768.4		TNIK-204	0.904779	2.97181	0.843237	3.52429	0.000424614	0.00489848	TRUE	UP	ENST00000436636.7
DIP2C	0.646653	2.80621	1.00097	2.80349	0.00505522	0.0267203	TRUE	UP	ENSG00000151240.17		NRIR-201	0.688054	2.97028	0.967348	3.07054	0.0021367	0.0173543	TRUE	UP	ENST00000366140.6
CCDC181	0.618515	2.80521	0.960249	2.92134	0.0034853	0.0198154	TRUE	UP	ENSG00000117477.13		SLFN11-214	0.692846	2.96893	0.964652	3.07772	0.00208592	0.0170402	TRUE	UP	ENST00000685675.1
RNF19B	0.870283	2.80209	0.90125	3.10912	0.00187646	0.0121095	TRUE	UP	ENSG00000116514.17		UBE2CP5-202	1.36219	2.96757	0.998373	2.97241	0.00295473	0.0223078	TRUE	UP	ENST00000604665.1
WWOX	1.93369	2.79543	0.704318	3.96899	7.21788e-05	0.000843052	TRUE	UP	ENSG00000186153.18		ZNF430-201	1.34735	2.95573	0.76925	3.84236	0.000121857	0.00172952	TRUE	UP	ENST00000261560.10
NUDT11	1.20194	2.79472	0.773212	3.61443	0.000301006	0.002749	TRUE	UP	ENSG00000196368.5		MED23-205	0.891223	2.95495	0.856959	3.44819	0.000564367	0.00614727	TRUE	UP	ENST00000368068.8
HOXB9	0.794188	2.79169	0.865432	3.22578	0.00125631	0.00874106	TRUE	UP	ENSG00000170689.10		SH3BGRL2-201	0.670674	2.95378	0.959625	3.07805	0.00208358	0.0170402	TRUE	UP	ENST00000369838.6
BRMS1L	0.842875	2.79025	0.925605	3.01452	0.00257388	0.0154132	TRUE	UP	ENSG00000100916.14		CRYBG3-201	0.87438	2.95223	0.85069	3.47039	0.000519704	0.00573488	TRUE	UP	ENST00000389622.7
RFXAP	1.31944	2.78036	0.763948	3.63946	0.000273215	0.00254408	TRUE	UP	ENSG00000133111.4		ENST00000435597	0.868689	2.94993	0.850815	3.46718	0.000525951	0.00578867	TRUE	UP	ENST00000435597.1
H6PD	0.602932	2.77995	1.03804	2.67808	0.00740459	0.0356147	TRUE	UP	ENSG00000049239.13		SPEN-201	6.28586	2.94789	0.403984	7.29704	2.94157e-13	2.65708e-11	TRUE	UP	ENST00000375759.8
SPEN	9.66017	2.77933	0.31803	8.7392	2.34763e-18	2.52878e-16	TRUE	UP	ENSG00000065526.13		UBAP2L-203	1.14755	2.94787	0.817925	3.60408	0.000313258	0.0038238	TRUE	UP	ENST00000361546.6
ENSG00000283674	0.599151	2.77922	0.966125	2.87667	0.00401894	0.0222354	TRUE	UP	ENSG00000283674.3		CEP43-202	1.73435	2.94594	0.737487	3.99457	6.48117e-05	0.00103095	TRUE	UP	ENST00000366847.9
ENSG00000276077	1.02314	2.77911	0.809306	3.43394	0.000594866	0.0048013	TRUE	UP	ENSG00000276077.4		HEY1-202	3.00606	2.93813	0.579992	5.06581	4.06673e-07	1.24222e-05	TRUE	UP	ENST00000354724.8
TENM3	1.54827	2.77763	0.75838	3.66258	0.000249688	0.00236796	TRUE	UP	ENSG00000218336.9		GABPA-202	1.97964	2.93753	0.693133	4.23805	2.2547e-05	0.00042748	TRUE	UP	ENST00000400075.4
ZNF483	0.80973	2.77571	0.894308	3.10376	0.00191081	0.0122858	TRUE	UP	ENSG00000173258.13		DZIP3-201	0.665813	2.93279	0.982709	2.98439	0.00284146	0.021669	TRUE	UP	ENST00000361582.8
TDRD7	0.588578	2.76422	0.997897	2.77005	0.00560479	0.0288336	TRUE	UP	ENSG00000196116.8		CCND2-201	0.861014	2.92806	0.84972	3.44591	0.000569134	0.00617791	TRUE	UP	ENST00000261254.8
LINC02210	0.646227	2.76401	1.02781	2.68921	0.0071621	0.034723	TRUE	UP	ENSG00000204650.14		FBRS-202	1.57622	2.91641	0.733018	3.97863	6.93141e-05	0.00109432	TRUE	UP	ENST00000356166.11
TNIK	0.810184	2.76333	0.872977	3.16541	0.00154863	0.010346	TRUE	UP	ENSG00000154310.17		GATA6-201	1.3247	2.91623	0.77389	3.76828	0.000164378	0.00223279	TRUE	UP	ENST00000269216.10
GLI3	1.04606	2.75991	0.82496	3.34551	0.000821305	0.00621452	TRUE	UP	ENSG00000106571.15		LINC00342-209	5.85999	2.91553	0.420472	6.93396	4.09223e-12	3.2962e-10	TRUE	UP	ENST00000661329.1
MAGI2	0.609346	2.75796	1.01378	2.72047	0.00651888	0.0324272	TRUE	UP	ENSG00000187391.22		UBA1-206	0.672404	2.91221	0.99137	2.93756	0.00330811	0.0243082	TRUE	UP	ENST00000442035.5
CLGN	0.584774	2.75715	1.02341	2.69409	0.00705808	0.0343456	TRUE	UP	ENSG00000153132.13		SNCA-205	0.831704	2.91008	0.847898	3.43212	0.000598888	0.00640751	TRUE	UP	ENST00000394991.8
LINC02381	0.796599	2.75651	0.906236	3.04171	0.0023524	0.0143932	TRUE	UP	ENSG00000250742.6		CEP78-211	0.816809	2.90989	0.875021	3.32551	0.000882567	0.0086991	TRUE	UP	ENST00000536374.1
ZNF224	0.786913	2.75628	0.856631	3.21758	0.00129279	0.00893661	TRUE	UP	ENSG00000267680.6		NUDT11-201	1.2393	2.90987	0.770871	3.77478	0.00016015	0.00218947	TRUE	UP	ENST00000375992.4
RUFY3	3.02637	2.75599	0.578135	4.76703	1.8696e-06	3.78475e-05	TRUE	UP	ENSG00000018189.13		HSPA1B-201	24.6078	2.90895	0.209626	13.8769	8.75026e-44	6.14754e-41	TRUE	UP	ENST00000375650.5
HMGA2	1.52	2.75044	0.760959	3.61444	0.000300993	0.002749	TRUE	UP	ENSG00000149948.14		SPAG9-209	0.87098	2.90577	0.862733	3.36809	0.000756899	0.00773787	TRUE	UP	ENST00000510283.5
XKR6	0.602183	2.74085	1.02034	2.6862	0.00722688	0.0349526	TRUE	UP	ENSG00000171044.11		SRSF11-209	0.802653	2.90311	0.886039	3.2765	0.00105101	0.00997077	TRUE	UP	ENST00000463877.1
C1orf21	0.606308	2.73938	0.974772	2.81028	0.0049498	0.0262694	TRUE	UP	ENSG00000116667.15		FBXO5-202	2.084	2.90215	0.697229	4.16241	3.14911e-05	0.000562481	TRUE	UP	ENST00000367241.3
PCSK1N	0.599859	2.73684	1.06998	2.55784	0.0105326	0.04653	TRUE	UP	ENSG00000102109.9		CCDC28B-201	0.667972	2.90182	0.972827	2.98287	0.0028556	0.0217149	TRUE	UP	ENST00000373602.10
PTPRG	1.17852	2.73602	0.803121	3.40674	0.000657436	0.00521467	TRUE	UP	ENSG00000144724.20		RFXAP-201	1.36354	2.89384	0.761998	3.7977	0.000146043	0.00203848	TRUE	UP	ENST00000255476.3
RORA	0.597181	2.73497	0.978898	2.79392	0.0052073	0.0272875	TRUE	UP	ENSG00000069667.16		SCML2-201	1.07917	2.89258	0.802252	3.60557	0.000311468	0.00380562	TRUE	UP	ENST00000251900.9
UTRN	3.13992	2.73289	0.559481	4.88469	1.03594e-06	2.27101e-05	TRUE	UP	ENSG00000152818.20		WDR33-204	1.09184	2.88191	0.823498	3.49959	0.000465978	0.00527552	TRUE	UP	ENST00000409658.7
IRX5	0.593282	2.73138	0.989547	2.76023	0.00577606	0.0295232	TRUE	UP	ENSG00000176842.16		RSPH3-201	1.26556	2.8718	0.778753	3.68769	0.000226296	0.00291717	TRUE	UP	ENST00000367069.7
PRRG4	0.593463	2.73001	0.971241	2.81085	0.00494113	0.0262554	TRUE	UP	ENSG00000135378.4		KPNA5-202	1.28117	2.86921	0.77175	3.71779	0.000200971	0.00265013	TRUE	UP	ENST00000368564.7
SETD1A	0.762399	2.72474	0.915596	2.97592	0.00292111	0.0171051	TRUE	UP	ENSG00000099381.19		MOXD1-202	0.80551	2.86861	0.914521	3.13673	0.00170844	0.0146474	TRUE	UP	ENST00000367963.8
MMAB	0.589651	2.72017	0.989829	2.74812	0.00599384	0.0304579	TRUE	UP	ENSG00000139428.12		BAZ2A-214	1.30174	2.8653	0.769297	3.72457	0.000195651	0.00259079	TRUE	UP	ENST00000551812.5
KLF8	1.20736	2.71242	0.789375	3.43616	0.000590012	0.00477538	TRUE	UP	ENSG00000102349.18		CEP43-222	0.840047	2.86478	0.864076	3.31542	0.000915059	0.00890199	TRUE	UP	ENST00000705168.1
ZRANB3	0.754698	2.71136	0.884783	3.06444	0.00218078	0.0135628	TRUE	UP	ENSG00000121988.18		WTAP-201	1.89713	2.8548	0.70877	4.02783	5.62941e-05	0.000907812	TRUE	UP	ENST00000337387.4
DZIP3	0.763029	2.70881	0.892171	3.0362	0.00239577	0.0146073	TRUE	UP	ENSG00000198919.13		HOXA10-201	4.98244	2.85101	0.531376	5.36533	8.08012e-08	2.87834e-06	TRUE	UP	ENST00000283921.5
ENSG00000272763	0.584749	2.70857	0.995496	2.72082	0.00651198	0.0324272	TRUE	UP	ENSG00000272763.1		ARL6-203	0.860913	2.85031	0.8805	3.23715	0.00120729	0.0111931	TRUE	UP	ENST00000463745.6
FKRP	1.24357	2.70155	0.781655	3.45619	0.000547865	0.00449682	TRUE	UP	ENSG00000181027.11		TENM3-204	1.27737	2.84728	0.782357	3.63937	0.000273309	0.00340855	TRUE	UP	ENST00000511685.6
P2RY1	0.606084	2.70155	1.03605	2.60754	0.00911948	0.0418116	TRUE	UP	ENSG00000169860.7		MED30-201	1.28797	2.84631	0.774707	3.67404	0.000238743	0.00305891	TRUE	UP	ENST00000297347.7
DOCK3	0.586132	2.70053	1.01866	2.65106	0.00802401	0.0378021	TRUE	UP	ENSG00000088538.13		WHAMM-201	1.6341	2.83965	0.756147	3.75541	0.000173055	0.00232814	TRUE	UP	ENST00000286760.5
ACP6	1.49178	2.70027	0.741876	3.63978	0.000272872	0.0025436	TRUE	UP	ENSG00000162836.12		CSNK1D-217	1.26767	2.83935	0.777778	3.6506	0.000261632	0.00330602	TRUE	UP	ENST00000581241.5
PDE5A	1.17075	2.69987	0.792886	3.40511	0.000661368	0.00523633	TRUE	UP	ENSG00000138735.16		CCNL2-217	1.29177	2.8355	0.780864	3.63123	0.00028207	0.00349711	TRUE	UP	ENST00000496007.5
POMT1	1.15233	2.69864	0.779492	3.46205	0.000536085	0.00441675	TRUE	UP	ENSG00000130714.19		ANKRD36-204	1.31777	2.83494	0.777259	3.64736	0.000264952	0.00333392	TRUE	UP	ENST00000461153.7
PTCH1	1.163	2.69541	0.785343	3.43214	0.000598843	0.00482447	TRUE	UP	ENSG00000185920.18		ENST00000473204	1.04412	2.8344	0.821098	3.45196	0.000556533	0.00607764	TRUE	UP	ENST00000473204.5
MSX1	0.985262	2.69514	0.856013	3.14848	0.00164121	0.0108977	TRUE	UP	ENSG00000163132.8		EPHA3-201	0.851531	2.82584	0.867995	3.25559	0.00113157	0.0105842	TRUE	UP	ENST00000336596.7
TSHZ1	1.50182	2.69131	0.735974	3.65681	0.000255378	0.00241265	TRUE	UP	ENSG00000179981.11		NASP-218	0.773924	2.82217	0.926876	3.04482	0.00232823	0.0186347	TRUE	UP	ENST00000530073.5
GCA	1.19604	2.68612	0.794995	3.37879	0.000728052	0.00564644	TRUE	UP	ENSG00000115271.11		SMAD9-202	0.810449	2.81518	0.890304	3.16204	0.00156669	0.0137395	TRUE	UP	ENST00000379826.5
IGF2BP2	3.84173	2.68391	0.490004	5.47732	4.31805e-08	1.26426e-06	TRUE	UP	ENSG00000073792.16		RUFY3-202	0.996198	2.81122	0.836716	3.35983	0.000779906	0.0079028	TRUE	UP	ENST00000381006.8
CA8	0.603098	2.68267	0.995588	2.69456	0.00704818	0.0343445	TRUE	UP	ENSG00000178538.10		MARCKSL1-201	7.87296	2.80841	0.349952	8.02514	1.01412e-15	1.24511e-13	TRUE	UP	ENST00000329421.8
ZYG11B	4.63538	2.67901	0.453665	5.90526	3.5209e-09	1.26419e-07	TRUE	UP	ENSG00000162378.13		ACP6-205	0.97489	2.80633	0.827647	3.39074	0.000697045	0.00720755	TRUE	UP	ENST00000583509.7
TMSB15B	0.589685	2.67862	1.058	2.53179	0.0113483	0.0492462	TRUE	UP	ENSG00000269226.8		MSX1-201	1.01875	2.8028	0.842734	3.32584	0.00088151	0.00869546	TRUE	UP	ENST00000382723.5
STX12	1.61754	2.67363	0.727995	3.67259	0.000240101	0.00229702	TRUE	UP	ENSG00000117758.14		MLF1-201	0.754931	2.7958	0.884888	3.1595	0.00158042	0.013812	TRUE	UP	ENST00000355893.11
PCLO	0.559483	2.67058	1.03243	2.58669	0.00969022	0.0438795	TRUE	UP	ENSG00000186472.20		CLEC2D-203	1.34214	2.78882	0.776573	3.59119	0.000329177	0.00400267	TRUE	UP	ENST00000290855.11
MARCKSL1	7.50377	2.66891	0.351205	7.5993	2.97734e-14	2.14689e-12	TRUE	UP	ENSG00000175130.7		DYNC2H1-202	1.0115	2.78645	0.847828	3.28658	0.00101413	0.00970099	TRUE	UP	ENST00000375735.7
EN2	0.771746	2.66217	0.85884	3.09972	0.00193701	0.0123994	TRUE	UP	ENSG00000164778.4		FGD1-201	0.790132	2.7818	0.878736	3.16568	0.00154719	0.0135968	TRUE	UP	ENST00000375135.4
CKMT1B	0.552191	2.66144	0.97739	2.723	0.00646914	0.0322902	TRUE	UP	ENSG00000237289.10		EN2-201	0.801616	2.7778	0.864149	3.21449	0.00130675	0.0118886	TRUE	UP	ENST00000297375.4
ENSG00000247679	0.590006	2.65953	0.999284	2.66143	0.00778094	0.0369161	TRUE	UP	ENSG00000247679.3		NR6A1-205	0.964369	2.77613	0.824576	3.36673	0.000760647	0.0077468	TRUE	UP	ENST00000487099.7
USP11	3.77511	2.65741	0.494096	5.37832	7.5185e-08	2.12294e-06	TRUE	UP	ENSG00000102226.10		TRA2A-209	1.01026	2.77314	0.83635	3.31577	0.000913913	0.00890199	TRUE	UP	ENST00000494255.5
MEGF8	1.55393	2.65611	0.769794	3.45042	0.000559715	0.00457687	TRUE	UP	ENSG00000105429.13		TM2D3-201	1.29765	2.77199	0.793549	3.49315	0.000477352	0.0053802	TRUE	UP	ENST00000333202.8
AGPAT4	0.939298	2.65177	0.856685	3.09538	0.0019656	0.0125456	TRUE	UP	ENSG00000026652.15		STRN3-202	0.96983	2.75788	0.833383	3.30926	0.000935438	0.00905951	TRUE	UP	ENST00000357479.10
TIAM2	0.729959	2.65175	0.924244	2.8691	0.00411639	0.0226453	TRUE	UP	ENSG00000146426.19		MORC3-201	0.741326	2.75509	0.924972	2.97857	0.00289597	0.0219428	TRUE	UP	ENST00000400485.6
CCDC28A	1.43698	2.64867	0.743877	3.56062	0.000369979	0.00327059	TRUE	UP	ENSG00000024862.18		TMEM177-202	0.768357	2.7538	0.911349	3.02168	0.00251378	0.0198064	TRUE	UP	ENST00000401466.5
NUDT10	0.54633	2.64643	1.04371	2.53561	0.0112251	0.0489208	TRUE	UP	ENSG00000122824.11		NUP42-206	0.954732	2.74752	0.842373	3.26164	0.00110768	0.0103838	TRUE	UP	ENST00000477844.1
LARP1B	1.67638	2.64619	0.718852	3.68113	0.000232201	0.00223368	TRUE	UP	ENSG00000138709.20		ENST00000671635	0.769976	2.74735	0.903265	3.04157	0.00235344	0.0188008	TRUE	UP	ENST00000671635.1
RSBN1	1.20057	2.6456	0.805595	3.28403	0.00102332	0.0074034	TRUE	UP	ENSG00000081019.14		ARL10-201	1.47313	2.74307	0.743693	3.68844	0.000225633	0.00291456	TRUE	UP	ENST00000310389.6
EDA2R	0.984833	2.64408	0.816946	3.23655	0.00120986	0.00845834	TRUE	UP	ENSG00000131080.15		ENST00000623374	1.44214	2.74254	0.74891	3.66204	0.000250215	0.00318293	TRUE	UP	ENST00000623374.1
SH3BGRL2	0.56613	2.64235	1.01053	2.61482	0.00892749	0.0411041	TRUE	UP	ENSG00000198478.8		ENST00000651444	1.02316	2.74216	0.851293	3.22117	0.00127667	0.0116906	TRUE	UP	ENST00000651444.1
PPIP5K1	0.966647	2.63513	0.858445	3.06965	0.00214308	0.0133802	TRUE	UP	ENSG00000168781.24		PPIL4-201	3.94297	2.73869	0.494459	5.53876	3.04617e-08	1.2152e-06	TRUE	UP	ENST00000253329.3
RNF40	0.932103	2.63365	0.829059	3.17668	0.00148973	0.0100138	TRUE	UP	ENSG00000103549.22		SPDYE5-201	1.23983	2.73793	0.796644	3.43683	0.000588558	0.00633438	TRUE	UP	ENST00000625065.4
AUTS2	2.28771	2.63354	0.63696	4.13455	3.55651e-05	0.000468033	TRUE	UP	ENSG00000158321.19		PIGP-203	0.730411	2.73765	0.967248	2.83035	0.00464966	0.0313765	TRUE	UP	ENST00000399098.5
NUP62CL	1.33528	2.62928	0.787234	3.3399	0.000838073	0.00630361	TRUE	UP	ENSG00000198088.10		ENST00000623047	0.740211	2.73672	0.932511	2.93479	0.00333773	0.0244548	TRUE	UP	ENST00000623047.1
ZFP90	0.704863	2.62747	0.884794	2.96958	0.00298204	0.0174035	TRUE	UP	ENSG00000184939.16		ENST00000653258	0.783326	2.73639	0.921269	2.97024	0.00297565	0.0224122	TRUE	UP	ENST00000653258.1
ZNF721	0.92054	2.61995	0.834348	3.14011	0.00168884	0.0111545	TRUE	UP	ENSG00000182903.16		ING5-201	1.19843	2.7349	0.776335	3.52284	0.000426956	0.00491738	TRUE	UP	ENST00000313552.11
UACA	2.64087	2.61926	0.58467	4.47989	7.468e-06	0.000125064	TRUE	UP	ENSG00000137831.15		PCNX4-203	1.47728	2.73169	0.755242	3.61697	0.000298073	0.0036632	TRUE	UP	ENST00000406854.6
GPC4	0.557255	2.61645	1.03406	2.53027	0.0113974	0.0493755	TRUE	UP	ENSG00000076716.9		ZSWIM9-203	0.89543	2.73152	0.840379	3.25034	0.00115268	0.0107498	TRUE	UP	ENST00000614654.2
RAB40B	0.925761	2.61471	0.845783	3.09147	0.00199171	0.0126293	TRUE	UP	ENSG00000141542.11		NT5DC1-201	2.44074	2.73104	0.628949	4.34222	1.41047e-05	0.000284911	TRUE	UP	ENST00000319550.9
SESN1	0.928158	2.61186	0.845844	3.08788	0.00201592	0.0127456	TRUE	UP	ENSG00000080546.14		PRMT2-211	0.737215	2.72786	0.907727	3.00515	0.00265451	0.0205944	TRUE	UP	ENST00000481861.1
ADCY1	0.543917	2.6099	1.01043	2.58296	0.00979557	0.0442734	TRUE	UP	ENSG00000164742.16		ARG2-201	0.712571	2.7271	0.934459	2.91837	0.00351866	0.0252823	TRUE	UP	ENST00000261783.4
SCOC	3.01285	2.60905	0.549605	4.74713	2.06321e-06	4.10994e-05	TRUE	UP	ENSG00000153130.18		PIK3C2A-201	0.992717	2.72506	0.862069	3.16107	0.0015719	0.0137725	TRUE	UP	ENST00000265970.11
C6orf141	0.691719	2.60697	0.976608	2.66941	0.00759838	0.0362188	TRUE	UP	ENSG00000197261.12		SLC26A4-AS1-211	0.730576	2.72128	0.911891	2.98421	0.00284309	0.021669	TRUE	UP	ENST00000668981.1
CTSV	1.34798	2.59833	0.752507	3.4529	0.000554596	0.00454779	TRUE	UP	ENSG00000136943.12		SIX1-205	1.45335	2.71953	0.747078	3.64022	0.000272402	0.00340058	TRUE	UP	ENST00000645694.3
MAP3K5	1.54554	2.59605	0.768827	3.37663	0.000733785	0.00568081	TRUE	UP	ENSG00000197442.11		CLN8-201	0.942896	2.71752	0.828207	3.28121	0.00103363	0.00985021	TRUE	UP	ENST00000331222.6
HEY1	6.70714	2.59575	0.366464	7.08324	1.4082e-12	8.13679e-11	TRUE	UP	ENSG00000164683.19		MSX2-201	2.42904	2.71719	0.624939	4.34793	1.37427e-05	0.000278509	TRUE	UP	ENST00000239243.7
DENND4A	1.50317	2.59426	0.760696	3.41038	0.000648734	0.00516553	TRUE	UP	ENSG00000174485.16		SORT1-201	1.00296	2.71392	0.829346	3.27237	0.00106651	0.010065	TRUE	UP	ENST00000256637.8
CCNF	0.539195	2.5935	0.984873	2.63334	0.00845509	0.0393234	TRUE	UP	ENSG00000162063.13		ZFP37-201	0.736301	2.71018	0.916456	2.95724	0.00310409	0.0230772	TRUE	UP	ENST00000374227.8
PTPN13	1.09554	2.59225	0.804772	3.2211	0.00127701	0.00884982	TRUE	UP	ENSG00000163629.13		CAMK1-201	0.771781	2.70786	0.930669	2.90959	0.00361904	0.0259006	TRUE	UP	ENST00000256460.8
LRRC37B	0.715528	2.58957	0.919779	2.81543	0.00487122	0.0259313	TRUE	UP	ENSG00000185158.13		EIF4A2-205	3.00212	2.70695	0.550862	4.91403	8.92251e-07	2.49082e-05	TRUE	UP	ENST00000440191.6
FGFR3	0.942156	2.5854	0.861009	3.00276	0.00267545	0.0158614	TRUE	UP	ENSG00000068078.20		RAB2B-201	0.914782	2.70556	0.837312	3.23125	0.00123251	0.0113852	TRUE	UP	ENST00000397762.6
PNMA8A	0.533454	2.58427	1.02345	2.52505	0.0115683	0.0498437	TRUE	UP	ENSG00000182013.18		ENST00000701844	13.2895	2.70211	0.274811	9.83259	8.14929e-23	1.94445e-20	TRUE	UP	ENST00000701844.1
ID2	5.12183	2.58259	0.412551	6.26006	3.84829e-10	1.61425e-08	TRUE	UP	ENSG00000115738.10		DLGAP5-202	1.66967	2.699	0.712532	3.7879	0.000151925	0.00209972	TRUE	UP	ENST00000395425.6
ZNF462	1.39346	2.58245	0.743838	3.47179	0.000516998	0.00429293	TRUE	UP	ENSG00000148143.13		EMILIN2-201	0.76577	2.69723	0.894955	3.01381	0.00257988	0.0201638	TRUE	UP	ENST00000254528.4
EPS8	1.0582	2.57949	0.806204	3.19955	0.00137643	0.00939697	TRUE	UP	ENSG00000151491.14		THOC2-220	0.923449	2.69593	0.867307	3.1084	0.00188105	0.0157639	TRUE	UP	ENST00000618150.4
BLTP1	1.90236	2.57641	0.685775	3.75693	0.000172009	0.0017209	TRUE	UP	ENSG00000138688.17		GRK3-201	1.20145	2.69319	0.784289	3.43393	0.000594904	0.00638638	TRUE	UP	ENST00000324198.11
PTPN9	0.907998	2.56926	0.841681	3.05253	0.00226918	0.0140018	TRUE	UP	ENSG00000169410.11		TM2D3-202	1.43356	2.68812	0.76229	3.52638	0.000421289	0.00487878	TRUE	UP	ENST00000347970.7
SHOC1	0.686687	2.56844	0.971389	2.64409	0.00819111	0.0382942	TRUE	UP	ENSG00000165181.17		UBXN4-203	0.955617	2.68779	0.850384	3.16067	0.00157404	0.0137725	TRUE	UP	ENST00000416538.5
NUP42	1.04115	2.5664	0.825835	3.10764	0.00188585	0.0121432	TRUE	UP	ENSG00000136243.18		USP9X-209	0.954324	2.68683	0.85696	3.13531	0.00171675	0.0146987	TRUE	UP	ENST00000703986.1
AP1S2	0.914928	2.56259	0.838785	3.05513	0.00224965	0.0139136	TRUE	UP	ENSG00000182287.15		MYO6-201	0.913626	2.68443	0.843486	3.18254	0.00145991	0.013001	TRUE	UP	ENST00000369975.6
ZNF592	1.34813	2.55682	0.762866	3.35159	0.000803478	0.00612919	TRUE	UP	ENSG00000166716.10		LSR-202	0.707298	2.68163	0.93769	2.85982	0.0042388	0.0291235	TRUE	UP	ENST00000354900.7
MYO9A	2.76561	2.55659	0.565389	4.52182	6.13097e-06	0.000104274	TRUE	UP	ENSG00000066933.16		PRRG4-201	0.751846	2.67734	0.902806	2.96557	0.00302121	0.0226405	TRUE	UP	ENST00000257836.4
PAG1	0.72686	2.55517	0.954692	2.67643	0.007441	0.0357111	TRUE	UP	ENSG00000076641.4		LLGL1-201	0.712974	2.67624	0.917026	2.91839	0.00351843	0.0252823	TRUE	UP	ENST00000316843.9
ENSG00000277067	1.12544	2.55495	0.78261	3.26465	0.00109598	0.00782524	TRUE	UP	ENSG00000277067.4		MAP3K5-203	0.78051	2.67464	0.925168	2.89097	0.00384049	0.0270266	TRUE	UP	ENST00000698928.1
RNASET2	0.920467	2.55485	0.849445	3.00767	0.00263259	0.0156543	TRUE	UP	ENSG00000026297.17		PAG1-201	0.760396	2.67262	0.942544	2.83554	0.00457486	0.030971	TRUE	UP	ENST00000220597.4
SCML2	1.43521	2.55269	0.752884	3.39054	0.000697538	0.00546331	TRUE	UP	ENSG00000102098.19		PCMT1-203	3.36161	2.67102	0.527039	5.06797	4.02076e-07	1.23414e-05	TRUE	UP	ENST00000367384.8
ITPK1	0.896166	2.55106	0.881141	2.89518	0.00378938	0.0211531	TRUE	UP	ENSG00000100605.17		SLC6A15-201	0.935328	2.66663	0.823113	3.23969	0.00119658	0.0111101	TRUE	UP	ENST00000266682.10
PXK	0.848201	2.5492	0.850927	2.99579	0.00273734	0.0161811	TRUE	UP	ENSG00000168297.16		AGO3-202	1.14196	2.66598	0.803992	3.31593	0.000913399	0.00890199	TRUE	UP	ENST00000324350.9
CLN8	0.669988	2.54668	0.959203	2.655	0.00793089	0.0374442	TRUE	UP	ENSG00000182372.10		ZNF224-203	0.701933	2.66229	0.920004	2.89379	0.00380628	0.0269042	TRUE	UP	ENST00000589060.1
RGPD6	1.10133	2.54419	0.799627	3.18172	0.00146405	0.00987107	TRUE	UP	ENSG00000183054.13		ALAD-201	0.722138	2.66171	0.925622	2.87559	0.00403267	0.0280667	TRUE	UP	ENST00000409155.8
DYNC2H1	2.49621	2.5415	0.600337	4.23345	2.3013e-05	0.000330244	TRUE	UP	ENSG00000187240.17		SOBP-201	0.872774	2.66106	0.857706	3.10253	0.00191872	0.0159738	TRUE	UP	ENST00000317357.10
HAUS5	2.28216	2.53706	0.630896	4.02137	5.78615e-05	0.000701169	TRUE	UP	ENSG00000249115.9		EMC10-201	3.16397	2.65767	0.554767	4.79061	1.66278e-06	4.41755e-05	TRUE	UP	ENST00000334976.11
MAN1A1	0.68785	2.53263	0.951584	2.66149	0.00777967	0.0369161	TRUE	UP	ENSG00000111885.7		MFGE8-201	0.941065	2.6576	0.874227	3.03995	0.00236619	0.018855	TRUE	UP	ENST00000268150.13
PLEKHA1	1.2914	2.53162	0.756396	3.34695	0.000817068	0.0061883	TRUE	UP	ENSG00000107679.15		PCNT-205	0.850958	2.65578	0.862865	3.07786	0.00208493	0.0170402	TRUE	UP	ENST00000480896.5
CEP104	2.36695	2.52831	0.627234	4.03089	5.55654e-05	0.000678053	TRUE	UP	ENSG00000116198.14		HEATR5B-201	0.91873	2.65308	0.85645	3.09776	0.00194986	0.0161586	TRUE	UP	ENST00000233099.6
CMTM7	0.668788	2.52793	0.930828	2.71578	0.00661191	0.032722	TRUE	UP	ENSG00000153551.14		KLHL23-202	2.04376	2.64925	0.674412	3.92824	8.55715e-05	0.00131009	TRUE	UP	ENST00000392647.7
KYAT3	1.04857	2.5271	0.807603	3.12914	0.00175321	0.0114755	TRUE	UP	ENSG00000137944.18		F11R-202	0.695192	2.64884	0.94672	2.79791	0.00514342	0.0337714	TRUE	UP	ENST00000368026.11
SALL1	0.677783	2.52318	0.949859	2.65638	0.00789849	0.037348	TRUE	UP	ENSG00000103449.13		FKBP15-206	0.714299	2.64711	0.93845	2.82072	0.00479154	0.0320993	TRUE	UP	ENST00000493847.2
CNNM4	1.15867	2.52185	0.794609	3.17371	0.00150506	0.0100904	TRUE	UP	ENSG00000158158.12		CLK2-207	1.29172	2.64341	0.766197	3.45004	0.000560494	0.00611562	TRUE	UP	ENST00000497188.1
ZFAND4	0.66384	2.51886	0.920017	2.73784	0.00618437	0.0311539	TRUE	UP	ENSG00000172671.20		TUBA1A-208	0.753636	2.64067	0.94526	2.79359	0.00521268	0.0340493	TRUE	UP	ENST00000550811.2
NUDT16	1.1047	2.51359	0.801758	3.1351	0.00171797	0.0113127	TRUE	UP	ENSG00000198585.12		SAMD5-201	0.697869	2.63744	0.981028	2.68845	0.00717849	0.0432282	TRUE	UP	ENST00000367474.2
ZNF519	1.36225	2.51116	0.758226	3.31188	0.0009267	0.00687532	TRUE	UP	ENSG00000175322.12		THOC2-216	1.09688	2.63588	0.803307	3.28128	0.00103335	0.00985021	TRUE	UP	ENST00000491737.5
FAM8A1	2.15253	2.50889	0.631846	3.97073	7.16527e-05	0.000839707	TRUE	UP	ENSG00000137414.7		ZNF618-201	0.939441	2.63248	0.855545	3.07696	0.00209122	0.0170507	TRUE	UP	ENST00000288466.11
PRDM2	1.28511	2.50722	0.766706	3.27012	0.00107503	0.00769887	TRUE	UP	ENSG00000116731.23		BRD2-219	0.871265	2.6319	0.847797	3.1044	0.00190668	0.0158944	TRUE	UP	ENST00000607833.5
PLS3-AS1	1.29994	2.50249	0.755127	3.314	0.000919713	0.00682936	TRUE	UP	ENSG00000271826.5		WTAP-206	1.20261	2.63141	0.786768	3.34458	0.00082406	0.00823799	TRUE	UP	ENST00000621533.5
SPEN-AS1	1.02406	2.50092	0.813235	3.07527	0.0021031	0.0131916	TRUE	UP	ENSG00000179743.4		PGRMC1-202	2.62096	2.6282	0.589229	4.4604	8.18071e-06	0.000178061	TRUE	UP	ENST00000535419.2
COL6A1	1.79533	2.4908	0.693552	3.59136	0.000328954	0.00296194	TRUE	UP	ENSG00000142156.16		NIN-231	0.947628	2.62712	0.838635	3.13261	0.00173257	0.0148041	TRUE	UP	ENST00000706712.1
WDTC1	0.66372	2.49045	0.969868	2.56782	0.010234	0.0456035	TRUE	UP	ENSG00000142784.16		XIAP-201	2.58538	2.62697	0.586787	4.47688	7.57432e-06	0.000166873	TRUE	UP	ENST00000355640.3
NRARP	0.837548	2.48944	0.872742	2.85243	0.00433858	0.023612	TRUE	UP	ENSG00000198435.4		PKD1P3-201	0.681286	2.62196	0.981405	2.67164	0.00754814	0.0450679	TRUE	UP	ENST00000534164.6
LRBA	2.2986	2.48865	0.6307	3.94586	7.95145e-05	0.000906881	TRUE	UP	ENSG00000198589.15		ID2-203	2.76123	2.62037	0.559659	4.68208	2.83975e-06	7.09714e-05	TRUE	UP	ENST00000396290.2
JPX	1.3214	2.48845	0.759353	3.27706	0.00104892	0.00756352	TRUE	UP	ENSG00000225470.9		CIRBP-214	0.82504	2.61727	0.866887	3.01916	0.00253472	0.0199276	TRUE	UP	ENST00000587896.6
KLHL23	1.92577	2.48716	0.678249	3.66703	0.000245381	0.00233983	TRUE	UP	ENSG00000213160.10		ZBTB5-201	0.697651	2.61649	0.967341	2.70482	0.00683406	0.0416098	TRUE	UP	ENST00000307750.5
SOBP	1.47718	2.48669	0.737711	3.37082	0.000749444	0.00577642	TRUE	UP	ENSG00000112320.12		CLASP2-227	0.877477	2.61325	0.86001	3.03863	0.00237659	0.018914	TRUE	UP	ENST00000682230.1
MTM1	1.3323	2.48219	0.754395	3.29031	0.00100078	0.00725234	TRUE	UP	ENSG00000171100.16		MRPL37-206	0.887544	2.60934	0.894501	2.91709	0.00353309	0.0253573	TRUE	UP	ENST00000605337.5
RAB8B	0.676567	2.4761	0.912119	2.71467	0.00663425	0.0327954	TRUE	UP	ENSG00000166128.13		ZNF117-201	0.848499	2.60698	0.865482	3.01218	0.00259382	0.0202603	TRUE	UP	ENST00000282869.11
ZNF704	0.854057	2.47527	0.857669	2.88604	0.00390121	0.0216803	TRUE	UP	ENSG00000164684.13		ZNF814-201	0.883168	2.60452	0.847879	3.07181	0.00212767	0.0172921	TRUE	UP	ENST00000435989.7
ENSG00000275496	1.03488	2.47312	0.815272	3.03349	0.00241743	0.0147188	TRUE	UP	ENSG00000275496.4		LINC00685-201	0.849362	2.6024	0.896068	2.90425	0.00368138	0.0262281	TRUE	UP	ENST00000391707.7_PAR_Y
TTC21B	1.01491	2.47079	0.805478	3.06748	0.00215869	0.0134629	TRUE	UP	ENSG00000123607.16		CCDC8-202	0.697745	2.60184	0.940706	2.76583	0.00567778	0.0362266	TRUE	UP	ENST00000697726.1
ZER1	1.33288	2.46274	0.753141	3.26996	0.00107564	0.00769887	TRUE	UP	ENSG00000160445.11		TMEM129-202	0.70619	2.59864	0.967418	2.68616	0.00722791	0.0435051	TRUE	UP	ENST00000382936.8
AP4S1	0.662419	2.4622	0.944751	2.60619	0.00915568	0.0419115	TRUE	UP	ENSG00000100478.16		GJC1-208	1.59085	2.59731	0.726041	3.57737	0.000347075	0.00416029	TRUE	UP	ENST00000592524.6
PPIL4	4.06014	2.45915	0.460051	5.34539	9.02232e-08	2.50792e-06	TRUE	UP	ENSG00000131013.4		XIST-215	0.691967	2.59598	0.964544	2.69141	0.00711512	0.0429693	TRUE	UP	ENST00000648607.1
SAMD4B	2.78001	2.45149	0.554572	4.42051	9.84662e-06	0.000159096	TRUE	UP	ENSG00000179134.16		DEPDC1-201	3.16988	2.59543	0.525983	4.93443	8.03831e-07	2.29983e-05	TRUE	UP	ENST00000370966.9
RTCA-AS1	0.652683	2.4511	0.923032	2.65549	0.00791931	0.0374099	TRUE	UP	ENSG00000224616.5		PCNX2-201	1.1004	2.5948	0.802198	3.23462	0.00121806	0.0112599	TRUE	UP	ENST00000258229.14
MAGEF1	1.87202	2.45008	0.678886	3.60897	0.000307415	0.00279979	TRUE	UP	ENSG00000177383.5		SCOC-209	1.35217	2.59449	0.754495	3.43871	0.000584494	0.00630675	TRUE	UP	ENST00000608372.6
NBEA	1.27078	2.44998	0.768529	3.18788	0.00143318	0.00970106	TRUE	UP	ENSG00000172915.20		MEAK7-201	0.872915	2.59437	0.869351	2.98427	0.0028426	0.021669	TRUE	UP	ENST00000343629.11
UBALD2	1.62558	2.44721	0.731538	3.34529	0.000821954	0.00621452	TRUE	UP	ENSG00000185262.9		BTBD7-203	0.700646	2.59407	0.920581	2.81786	0.00483447	0.0323304	TRUE	UP	ENST00000355125.3
EPHA4	0.821182	2.43881	0.872381	2.79558	0.00518062	0.0271967	TRUE	UP	ENSG00000116106.12		RAB8B-201	0.703478	2.59359	0.919492	2.82067	0.0047923	0.0320993	TRUE	UP	ENST00000321437.9
PIK3C2A	3.12752	2.43874	0.538941	4.52506	6.0379e-06	0.000102892	TRUE	UP	ENSG00000011405.14		IFTAP-208	0.696364	2.59316	0.927111	2.79703	0.0051575	0.0338287	TRUE	UP	ENST00000531554.6
PDE4DIP	3.05234	2.43781	0.532492	4.57812	4.69163e-06	8.25292e-05	TRUE	UP	ENSG00000178104.22		SRSF10-213	1.06246	2.58974	0.8006	3.23475	0.0012175	0.0112599	TRUE	UP	ENST00000485841.5
TRPM7	1.75919	2.43763	0.687404	3.54614	0.000390913	0.00341413	TRUE	UP	ENSG00000092439.16		FAM8A1-201	1.59869	2.58965	0.717138	3.61109	0.000304911	0.00373998	TRUE	UP	ENST00000259963.4
USPL1	0.997657	2.43583	0.812183	2.99911	0.00270771	0.0160168	TRUE	UP	ENSG00000132952.12		LRRC8A-201	0.666737	2.58864	0.948798	2.72833	0.00636555	0.0394022	TRUE	UP	ENST00000259324.5
ZNF675	1.01594	2.43503	0.833771	2.92051	0.00349462	0.0198377	TRUE	UP	ENSG00000197372.10		UACA-201	1.57708	2.58641	0.724177	3.57151	0.000354928	0.00423435	TRUE	UP	ENST00000322954.11
INPP5E	2.33425	2.43401	0.593437	4.10154	4.10409e-05	0.000528524	TRUE	UP	ENSG00000148384.14		TBC1D8B-203	0.67265	2.58412	0.973197	2.65529	0.00792411	0.0466681	TRUE	UP	ENST00000357242.10
CEP76	0.816792	2.43218	0.858645	2.83258	0.00461737	0.0247765	TRUE	UP	ENSG00000101624.11		ENST00000567141	1.32048	2.58329	0.752683	3.43211	0.000598899	0.00640751	TRUE	UP	ENST00000567141.1
SYT1	0.773213	2.43089	0.886402	2.74243	0.00609868	0.0308112	TRUE	UP	ENSG00000067715.15		NID2-201	0.672645	2.58247	0.981486	2.63118	0.00850881	0.0490663	TRUE	UP	ENST00000216286.10
CLK2	2.33563	2.42955	0.600532	4.04567	5.21733e-05	0.00064569	TRUE	UP	ENSG00000176444.19		INPP5E-201	1.0596	2.58155	0.803639	3.21232	0.00131668	0.0119483	TRUE	UP	ENST00000371712.4
MAPK8IP3	1.0369	2.42771	0.805319	3.01459	0.00257328	0.0154132	TRUE	UP	ENSG00000138834.15		PPM1K-210	0.867163	2.58153	0.843224	3.0615	0.00220234	0.017796	TRUE	UP	ENST00000608933.6
LARP7	1.27037	2.42654	0.765139	3.17138	0.00151718	0.0101592	TRUE	UP	ENSG00000174720.18		UTRN-204	3.08268	2.57945	0.538179	4.79292	1.64375e-06	4.37617e-05	TRUE	UP	ENST00000367545.8
PLCXD1	1.95752	2.42358	0.680448	3.56174	0.000368405	0.00326597	TRUE	UP	ENSG00000182378.15		CNNM4-201	1.17538	2.57882	0.799237	3.22661	0.00125267	0.0115377	TRUE	UP	ENST00000377075.3
SPDYE6	1.26031	2.42315	0.76354	3.17357	0.00150575	0.0100904	TRUE	UP	ENSG00000260097.3		ENST00000608694	0.896842	2.57879	0.852469	3.02508	0.00248567	0.0196216	TRUE	UP	ENST00000608694.2
TM2D3	4.25565	2.42194	0.445967	5.43076	5.61131e-08	1.6158e-06	TRUE	UP	ENSG00000184277.13		FBXL20-201	1.35196	2.57594	0.753527	3.41851	0.000629645	0.00666875	TRUE	UP	ENST00000264658.11
RSPH3	0.777586	2.41926	0.915288	2.64317	0.0082135	0.0383634	TRUE	UP	ENSG00000130363.13		KANSL1-221	0.680408	2.57555	0.978019	2.63344	0.0084525	0.0488753	TRUE	UP	ENST00000638902.1
MARK4	0.795314	2.41562	0.875088	2.76043	0.00577252	0.0295224	TRUE	UP	ENSG00000007047.16		MMS22L-201	1.07346	2.57112	0.800304	3.21268	0.00131502	0.0119466	TRUE	UP	ENST00000275053.8
MORC4	0.921476	2.41158	0.827589	2.91398	0.00356853	0.0201785	TRUE	UP	ENSG00000133131.15		VASH1-201	0.66462	2.57013	0.961485	2.67308	0.00751577	0.0449383	TRUE	UP	ENST00000167106.9
GANC	0.764836	2.41017	0.862446	2.79458	0.00519671	0.0272648	TRUE	UP	ENSG00000214013.10		ENST00000417194	1.36374	2.5664	0.755749	3.39584	0.000684193	0.00712711	TRUE	UP	ENST00000417194.5
GARRE1	1.24833	2.40927	0.779732	3.08987	0.00200245	0.0126788	TRUE	UP	ENSG00000166398.14		MCM9-205	1.07167	2.56542	0.797818	3.21555	0.00130197	0.0118879	TRUE	UP	ENST00000436788.2
ZNF654	1.05169	2.40788	0.825495	2.9169	0.00353533	0.0200167	TRUE	UP	ENSG00000175105.8		ZYG11B-201	4.75868	2.56506	0.431658	5.94235	2.80968e-09	1.34588e-07	TRUE	UP	ENST00000294353.7
WTAP	2.16981	2.40766	0.637988	3.77382	0.000160764	0.0016272	TRUE	UP	ENSG00000146457.16		ATP11B-201	1.40437	2.56299	0.761058	3.36767	0.000758067	0.00774086	TRUE	UP	ENST00000323116.10
RIC1	0.831712	2.40763	0.873573	2.75607	0.00585011	0.0298667	TRUE	UP	ENSG00000107036.12		BCAT1-201	0.681589	2.55736	0.943162	2.71147	0.00669856	0.0409425	TRUE	UP	ENST00000261192.12
ZFP37	0.784186	2.40727	0.865789	2.78043	0.00542869	0.0281618	TRUE	UP	ENSG00000136866.14		PHF6-204	2.10479	2.55432	0.771884	3.30921	0.00093561	0.00905951	TRUE	UP	ENST00000370803.8
ZNF275	1.35395	2.40587	0.80324	2.99521	0.00274255	0.0161997	TRUE	UP	ENSG00000063587.15		RNF40-201	1.32946	2.55321	0.75585	3.37794	0.00073032	0.00750254	TRUE	UP	ENST00000324685.11
TNFRSF10D	1.25865	2.39845	0.77511	3.09434	0.00197251	0.0125622	TRUE	UP	ENSG00000173530.6		TCP1-202	1.11838	2.55113	0.805923	3.16547	0.00154832	0.0135972	TRUE	UP	ENST00000392168.6
ANKRD46	1.47759	2.39648	0.724797	3.30642	0.000944952	0.00695309	TRUE	UP	ENSG00000186106.11		ENST00000608834	0.914856	2.54966	0.862465	2.95625	0.00311404	0.023124	TRUE	UP	ENST00000608834.1
AEN	2.71555	2.39487	0.568531	4.21237	2.52704e-05	0.00035677	TRUE	UP	ENSG00000181026.15		MCUB-201	1.10245	2.549	0.810839	3.14366	0.00166847	0.0144589	TRUE	UP	ENST00000394650.7
DOT1L	1.22412	2.39409	0.772126	3.10065	0.00193095	0.0123706	TRUE	UP	ENSG00000104885.19		ABHD18-207	1.09071	2.54792	0.798298	3.19169	0.00141441	0.0126656	TRUE	UP	ENST00000645843.2
GRK3	0.840944	2.39219	0.875	2.73393	0.00625826	0.0314173	TRUE	UP	ENSG00000100077.16		MACO1-201	0.892259	2.54658	0.859828	2.96173	0.00305912	0.0228399	TRUE	UP	ENST00000374343.5
LCORL	1.00506	2.39019	0.807735	2.95912	0.00308516	0.0178976	TRUE	UP	ENSG00000178177.17		FAM89A-201	0.846549	2.54434	0.853231	2.98201	0.00286361	0.0217628	TRUE	UP	ENST00000366654.5
TTC28	0.79486	2.38751	0.873379	2.73364	0.00626377	0.0314269	TRUE	UP	ENSG00000100154.15		ENST00000506640	1.34607	2.54046	0.76493	3.32117	0.000896416	0.00881499	TRUE	UP	ENST00000506640.3
METTL5	0.994411	2.38742	0.85336	2.79767	0.00514726	0.0270868	TRUE	UP	ENSG00000138382.15		CTSV-201	0.835885	2.54014	0.85518	2.9703	0.00297507	0.0224122	TRUE	UP	ENST00000259470.6
HEATR5B	1.02567	2.38462	0.821563	2.90254	0.00370146	0.0207687	TRUE	UP	ENSG00000008869.12		SRSF7-206	1.0724	2.5384	0.807242	3.14453	0.00166352	0.0144286	TRUE	UP	ENST00000431066.5
SPAG5	1.04156	2.37808	0.833451	2.85329	0.00432685	0.0235654	TRUE	UP	ENSG00000076382.17		SOD2-203	1.37244	2.5379	0.756348	3.35547	0.000792303	0.00800917	TRUE	UP	ENST00000367055.8
MIR503HG	0.760054	2.37755	0.907851	2.61888	0.00882182	0.0407145	TRUE	UP	ENSG00000223749.11		MAU2-201	0.875777	2.53542	0.871687	2.90863	0.00363011	0.0259358	TRUE	UP	ENST00000262815.13
AGO4	0.746168	2.37356	0.924802	2.56656	0.0102713	0.0457462	TRUE	UP	ENSG00000134698.11		SAMD4B-201	1.02085	2.53393	0.806084	3.14351	0.00166934	0.0144589	TRUE	UP	ENST00000314471.10
PLXNA1	1.05728	2.37222	0.825083	2.87513	0.00403862	0.022316	TRUE	UP	ENSG00000114554.12		NAA10-211	0.675792	2.52822	0.957227	2.64119	0.00826148	0.0481672	TRUE	UP	ENST00000477750.6
ANKAR	0.810365	2.37129	0.881823	2.68908	0.00716497	0.034723	TRUE	UP	ENSG00000151687.15		FYCO1-201	0.691847	2.52655	0.955429	2.64442	0.00818321	0.047799	TRUE	UP	ENST00000296137.7
CCP110	1.8289	2.36968	0.680258	3.4835	0.000494903	0.00415594	TRUE	UP	ENSG00000103540.17		RAB5B-201	1.28656	2.51935	0.769357	3.27461	0.00105808	0.0100213	TRUE	UP	ENST00000360299.10
WASHC3	1.25381	2.36939	0.764858	3.09781	0.00194957	0.0124524	TRUE	UP	ENSG00000120860.11		DZIP1-204	1.28953	2.51901	0.762637	3.30303	0.000956468	0.00920868	TRUE	UP	ENST00000376829.7
INTU	0.954961	2.36543	0.838788	2.82006	0.00480151	0.0256071	TRUE	UP	ENSG00000164066.13		BRD2-202	2.46806	2.51702	0.600167	4.19387	2.74237e-05	0.000501157	TRUE	UP	ENST00000374831.8
APPAT	2.00867	2.3651	0.647632	3.65192	0.000260285	0.00244455	TRUE	UP	ENSG00000230606.11		PARP6-211	1.12633	2.51288	0.821325	3.05954	0.00221673	0.0178895	TRUE	UP	ENST00000566991.5
MAST4	0.858123	2.36497	0.929786	2.54356	0.0109729	0.0479653	TRUE	UP	ENSG00000069020.19		PDCD2-208	2.50521	2.50764	0.591147	4.24199	2.2155e-05	0.00042068	TRUE	UP	ENST00000541970.6
ATP11B	1.26273	2.36312	0.776122	3.04477	0.00232855	0.0142873	TRUE	UP	ENSG00000058063.16		INPP5E-206	0.990681	2.5027	0.81537	3.0694	0.00214489	0.0174097	TRUE	UP	ENST00000676019.1
TMEM128	1.10035	2.36214	0.82899	2.84941	0.00437999	0.023751	TRUE	UP	ENSG00000132406.12		ENST00000651111	0.850014	2.50163	0.904708	2.76513	0.00569007	0.0362685	TRUE	UP	ENST00000651111.1
CDC26P1	1.47872	2.3614	0.724598	3.25891	0.00111841	0.00794633	TRUE	UP	ENSG00000238072.1		SEPTIN8-201	0.80434	2.49659	0.887187	2.81406	0.00489208	0.0325778	TRUE	UP	ENST00000296873.11
HEATR6	1.25491	2.35908	0.761129	3.09945	0.00193883	0.012402	TRUE	UP	ENSG00000068097.16		WDFY3-201	1.33964	2.49529	0.784371	3.18127	0.00146632	0.0130218	TRUE	UP	ENST00000295888.9
TCEANC2	1.22647	2.35822	0.795647	2.9639	0.00303769	0.017681	TRUE	UP	ENSG00000116205.14		CHD2-232	0.823751	2.49454	0.855954	2.91433	0.00356447	0.0255482	TRUE	UP	ENST00000700550.1
SLC6A15	3.18243	2.35779	0.502911	4.68829	2.75496e-06	5.32971e-05	TRUE	UP	ENSG00000072041.18		MIR34AHG-204	1.06402	2.49338	0.821965	3.03344	0.00241781	0.0192058	TRUE	UP	ENST00000635687.1
NT5DC1	0.967783	2.35661	0.847013	2.78227	0.00539807	0.0280681	TRUE	UP	ENSG00000178425.14		DANT2-206	2.99148	2.49334	0.531495	4.69119	2.71617e-06	6.82877e-05	TRUE	UP	ENST00000688552.1
CDC14B	2.03914	2.35362	0.638669	3.6852	0.000228526	0.00220319	TRUE	UP	ENSG00000081377.17		AIG1-202	2.03388	2.49138	0.636071	3.91683	8.9721e-05	0.00136372	TRUE	UP	ENST00000357847.9
UNC119	0.719026	2.35248	0.900344	2.61286	0.00897869	0.0412745	TRUE	UP	ENSG00000109103.12		AGO1-204	1.25194	2.4912	0.774466	3.21667	0.00129686	0.0118498	TRUE	UP	ENST00000674426.1
PHF13	0.985784	2.34757	0.846119	2.77452	0.0055284	0.0285536	TRUE	UP	ENSG00000116273.6		SLC16A1-AS1-204	3.7508	2.48884	0.484695	5.13486	2.82353e-07	8.92659e-06	TRUE	UP	ENST00000428411.6
CSNK1D	3.07296	2.34254	0.509794	4.59508	4.32585e-06	7.71841e-05	TRUE	UP	ENSG00000141551.15		THAP10-201	0.870079	2.48858	0.87622	2.84013	0.00450949	0.0306103	TRUE	UP	ENST00000249861.9
FBXO33	0.93891	2.34009	0.836505	2.79746	0.00515054	0.0270877	TRUE	UP	ENSG00000165355.8		DYNLT1-202	0.761953	2.48806	0.908827	2.73766	0.00618776	0.038585	TRUE	UP	ENST00000367088.1
LINC00342	3.62663	2.33524	0.484294	4.82195	1.42159e-06	2.96732e-05	TRUE	UP	ENSG00000232931.6		BEX3-202	1.28491	2.48613	0.767502	3.23925	0.00119843	0.0111191	TRUE	UP	ENST00000372634.1
UBXN4	8.26473	2.33505	0.316212	7.38446	1.53074e-13	1.01952e-11	TRUE	UP	ENSG00000144224.17		FGFR1OP2-201	0.803165	2.48446	0.886351	2.80303	0.00506257	0.0334315	TRUE	UP	ENST00000229395.8
HSPA14	1.19884	2.33493	0.824765	2.83103	0.0046399	0.0248821	TRUE	UP	ENSG00000187522.16		ANKRD36B-205	1.51807	2.47944	0.725061	3.41963	0.000627053	0.00664686	TRUE	UP	ENST00000443455.5
IRF2BPL	0.893557	2.32815	0.83084	2.80217	0.00507605	0.0267928	TRUE	UP	ENSG00000119669.5		PLXNA3-201	0.964418	2.47841	0.819884	3.02288	0.00250383	0.0197526	TRUE	UP	ENST00000369682.4
KPNA5	1.50716	2.32439	0.756185	3.07384	0.00211324	0.0132362	TRUE	UP	ENSG00000196911.12		SMPD4-201	1.02179	2.47699	0.820774	3.01787	0.0025456	0.0199576	TRUE	UP	ENST00000351288.10
YJU2B	1.55911	2.32293	0.740802	3.13569	0.00171451	0.0112984	TRUE	UP	ENSG00000104957.14		LRP1B-201	0.940251	2.47585	0.83614	2.96105	0.00306596	0.0228744	TRUE	UP	ENST00000389484.8
H2AC25	2.84718	2.32017	0.540231	4.29478	1.7487e-05	0.000260365	TRUE	UP	ENSG00000181218.6		ENST00000605920	1.77273	2.46827	0.689824	3.57812	0.00034608	0.0041523	TRUE	UP	ENST00000605920.1
POLD1	1.04717	2.31234	0.815488	2.83552	0.00457505	0.0246099	TRUE	UP	ENSG00000062822.16		ENST00000641271	1.01803	2.4639	0.822071	2.99718	0.00272485	0.0210369	TRUE	UP	ENST00000641271.1
PPP1R15A	1.20759	2.30908	0.788623	2.92799	0.00341161	0.0194933	TRUE	UP	ENSG00000087074.9		UBXN4-208	1.37169	2.46379	0.782432	3.14889	0.00163892	0.0142628	TRUE	UP	ENST00000490163.5
ELP5	0.776935	2.30392	0.885528	2.60174	0.00927511	0.0423029	TRUE	UP	ENSG00000170291.16		WTAP-202	2.45655	2.46084	0.608984	4.04089	5.32491e-05	0.00086738	TRUE	UP	ENST00000358372.8
ENSG00000279789	0.960274	2.30288	0.82617	2.78742	0.00531302	0.0277363	TRUE	UP	ENSG00000279789.1		HSF2-202	1.00993	2.45983	0.811422	3.0315	0.00243339	0.0192811	TRUE	UP	ENST00000452194.5
IAH1	0.808795	2.30053	0.908523	2.53216	0.0113361	0.0492462	TRUE	UP	ENSG00000134330.19		PHF13-201	1.01559	2.45939	0.83704	2.9382	0.00330128	0.024283	TRUE	UP	ENST00000377648.5
GINM1	1.13014	2.29994	0.805568	2.85505	0.004303	0.0234648	TRUE	UP	ENSG00000055211.14		DDX39B-202	2.96665	2.45864	0.530829	4.63169	3.62686e-06	8.82025e-05	TRUE	UP	ENST00000396172.6
LRRC41	1.37886	2.29795	0.731319	3.14219	0.00167686	0.0110948	TRUE	UP	ENSG00000132128.18		RTCA-AS1-204	1.23381	2.45791	0.787436	3.12141	0.00179988	0.0152454	TRUE	UP	ENST00000665523.2
MIR34AHG	0.978427	2.29328	0.829497	2.76467	0.00569812	0.0292273	TRUE	UP	ENSG00000228526.8		FBXO33-201	0.972421	2.45601	0.832368	2.95064	0.00317121	0.0235071	TRUE	UP	ENST00000298097.8
ATF7IP2	0.945077	2.28554	0.823803	2.77438	0.00553073	0.0285536	TRUE	UP	ENSG00000166669.14		ANKRD36-206	1.31598	2.45594	0.782077	3.14027	0.0016879	0.0145205	TRUE	UP	ENST00000652721.1
PCNT	3.09605	2.2842	0.505938	4.51478	6.33817e-06	0.00010738	TRUE	UP	ENSG00000160299.19		AKAP12-201	0.803688	2.45468	0.900863	2.72481	0.00643387	0.0397448	TRUE	UP	ENST00000253332.5
TNKS	1.16286	2.28414	0.781902	2.92126	0.00348615	0.0198154	TRUE	UP	ENSG00000173273.16		C19orf54-201	0.942742	2.45143	0.847545	2.8924	0.00382316	0.0269347	TRUE	UP	ENST00000378313.7
C17orf58	0.909094	2.28167	0.829372	2.75108	0.00593984	0.0302364	TRUE	UP	ENSG00000186665.10		OR9H1P-202	0.819131	2.44779	0.909188	2.69229	0.00709639	0.0429366	TRUE	UP	ENST00000641506.1
NIPAL3	1.90817	2.2802	0.646328	3.52793	0.00041882	0.00361088	TRUE	UP	ENSG00000001461.17		ENST00000649589	1.00545	2.44756	0.810915	3.01827	0.00254221	0.0199558	TRUE	UP	ENST00000649589.1
AIG1	3.85024	2.27943	0.450008	5.06531	4.07742e-07	9.82749e-06	TRUE	UP	ENSG00000146416.19		MSL1-203	0.992826	2.44605	0.806563	3.03268	0.00242394	0.0192303	TRUE	UP	ENST00000577454.5
TMEM170A	1.63946	2.27858	0.688808	3.30801	0.000939604	0.00694014	TRUE	UP	ENSG00000166822.13		RNF19B-201	0.854385	2.43677	0.90915	2.68027	0.00735618	0.0440883	TRUE	UP	ENST00000235150.5
PCNX2	1.37583	2.27628	0.749539	3.0369	0.00239022	0.0145891	TRUE	UP	ENSG00000135749.19		SNHG12-202	1.03107	2.43505	0.816066	2.98389	0.00284613	0.021669	TRUE	UP	ENST00000461832.2
PABIR1	1.16236	2.27585	0.785438	2.89756	0.00376075	0.0210166	TRUE	UP	ENSG00000187866.10		NPIPB7-202	0.861264	2.43039	0.881829	2.75608	0.00584987	0.0370019	TRUE	UP	ENST00000452313.6
CEP97	0.962418	2.26643	0.825722	2.74478	0.00605511	0.0306621	TRUE	UP	ENSG00000182504.12		ZNF462-201	0.970209	2.43026	0.820563	2.96169	0.00305952	0.0228399	TRUE	UP	ENST00000277225.10
TBC1D32	0.937632	2.26379	0.819284	2.76313	0.00572498	0.0293309	TRUE	UP	ENSG00000146350.14		SETX-201	2.65584	2.42923	0.566802	4.28585	1.82043e-05	0.000353085	TRUE	UP	ENST00000224140.6
SOX4	7.50033	2.26317	0.322836	7.01029	2.37827e-12	1.32168e-10	TRUE	UP	ENSG00000124766.7		SCAF8-202	0.823637	2.42301	0.871858	2.77913	0.00545047	0.0351129	TRUE	UP	ENST00000367186.7
MTA3	0.919132	2.26236	0.841248	2.68929	0.0071604	0.034723	TRUE	UP	ENSG00000057935.14		BAZ1A-202	1.78547	2.42169	0.692608	3.49647	0.000471449	0.00532792	TRUE	UP	ENST00000360310.6
HDHD3	1.57923	2.25877	0.693484	3.25713	0.00112544	0.00797245	TRUE	UP	ENSG00000119431.10		SNRPA1-205	0.806781	2.42105	0.894683	2.70604	0.00680901	0.0414972	TRUE	UP	ENST00000558036.5
ABHD2	2.51784	2.25784	0.571986	3.94736	7.90163e-05	0.000904747	TRUE	UP	ENSG00000140526.18		TSHZ1-204	0.805579	2.41542	0.891952	2.70801	0.00676881	0.0412768	TRUE	UP	ENST00000580243.3
CD99L2	0.949221	2.25678	0.837172	2.69572	0.00702367	0.034293	TRUE	UP	ENSG00000102181.21		ADD3-201	1.50986	2.41477	0.731101	3.30292	0.000956841	0.00920868	TRUE	UP	ENST00000277900.12
BSDC1	5.85754	2.25522	0.376378	5.9919	2.07404e-09	7.73332e-08	TRUE	UP	ENSG00000160058.19		SYT15B-201	0.962292	2.41372	0.841908	2.86696	0.00414435	0.028686	TRUE	UP	ENST00000615923.4
ENSG00000278766	1.0997	2.25113	0.813272	2.76799	0.00564037	0.0289824	TRUE	UP	ENSG00000278766.2		LINC00205-201	0.916656	2.41044	0.832528	2.89533	0.00378758	0.0268034	TRUE	UP	ENST00000400362.4
TJAP1	1.1411	2.24541	0.77686	2.89036	0.00384796	0.021439	TRUE	UP	ENSG00000137221.14		PUM1-206	1.67287	2.40934	0.693397	3.47469	0.000511437	0.00566343	TRUE	UP	ENST00000426105.7
TUBGCP5	2.19337	2.23935	0.605329	3.69939	0.000216119	0.00210216	TRUE	UP	ENSG00000275835.5		WASHC3-201	0.823437	2.40774	0.864214	2.78604	0.00533556	0.0347052	TRUE	UP	ENST00000240079.11
ZNF266	0.924217	2.23561	0.829095	2.69645	0.00700832	0.0342372	TRUE	UP	ENSG00000174652.20		UBALD2-201	1.82383	2.40626	0.690468	3.48497	0.000492184	0.00551298	TRUE	UP	ENST00000327490.8
MIR3648-1	6.11244	2.234	0.361372	6.18199	6.32982e-10	2.55684e-08	TRUE	UP	ENSG00000275708.1		EIF4G3-220	1.24171	2.40319	0.792852	3.03107	0.00243691	0.0192969	TRUE	UP	ENST00000685872.1
COA8	0.919424	2.23327	0.874741	2.55307	0.0106778	0.0469813	TRUE	UP	ENSG00000256053.9		ZMAT3-201	1.01	2.40229	0.83698	2.87019	0.00410223	0.028431	TRUE	UP	ENST00000311417.7
SCRN1	1.11906	2.23219	0.800489	2.78853	0.00529475	0.0276793	TRUE	UP	ENSG00000136193.17		STRN3-201	0.771413	2.39992	0.900609	2.66478	0.00770394	0.0456746	TRUE	UP	ENST00000355683.9
GPR137C	0.920661	2.23086	0.833447	2.67667	0.00743571	0.0357111	TRUE	UP	ENSG00000180998.12		RPL39-202	0.928699	2.39823	0.83303	2.87893	0.00399033	0.0278332	TRUE	UP	ENST00000468844.1
DYNLT1	12.3388	2.23036	0.253108	8.81191	1.23029e-18	1.35877e-16	TRUE	UP	ENSG00000146425.11		MORC4-202	0.892604	2.39738	0.844948	2.83732	0.00454945	0.0308485	TRUE	UP	ENST00000355610.9
RHBDD1	0.851534	2.22937	0.843013	2.64453	0.00818055	0.0382709	TRUE	UP	ENSG00000144468.17		NUDT16-202	0.998428	2.39629	0.824867	2.90506	0.00367178	0.0261892	TRUE	UP	ENST00000521288.2
CCNE1	0.946382	2.22802	0.847956	2.62752	0.00860095	0.0399167	TRUE	UP	ENSG00000105173.14		BCOR-202	1.79144	2.39449	0.688964	3.4755	0.000509908	0.0056564	TRUE	UP	ENST00000378444.9
SSBP2	0.940127	2.22793	0.823845	2.70431	0.00684465	0.0335881	TRUE	UP	ENSG00000145687.17		PABIR1-201	1.20123	2.39293	0.780197	3.06709	0.00216155	0.0175224	TRUE	UP	ENST00000394264.7
DACH1	0.915617	2.20539	0.823316	2.67867	0.0073915	0.035591	TRUE	UP	ENSG00000276644.5		DYRK4-217	0.781736	2.39214	0.875936	2.73096	0.00631508	0.0391586	TRUE	UP	ENST00000545571.5
PABIR2	1.37499	2.20487	0.747346	2.95027	0.003175	0.01837	TRUE	UP	ENSG00000156504.17		ENST00000484859	2.53119	2.39171	0.56542	4.22998	2.33715e-05	0.000438511	TRUE	UP	ENST00000484859.1
TFB1M	2.05547	2.20332	0.65355	3.37132	0.000748102	0.00577117	TRUE	UP	ENSG00000029639.11		KIF5C-217	1.20389	2.38857	0.791825	3.01654	0.00255679	0.019998	TRUE	UP	ENST00000677563.1
KAT7	1.09905	2.20049	0.788328	2.79134	0.00524908	0.0274569	TRUE	UP	ENSG00000136504.14		GABRE-209	1.95325	2.38104	0.640325	3.71849	0.000200418	0.00264837	TRUE	UP	ENST00000486255.1
ARID1B	5.41563	2.2	0.377928	5.82122	5.84204e-09	1.96802e-07	TRUE	UP	ENSG00000049618.25		CCDC200-214	1.21801	2.38028	0.772253	3.08225	0.00205442	0.0168922	TRUE	UP	ENST00000615433.2
NR6A1	1.61056	2.19772	0.690102	3.18464	0.00144937	0.00978771	TRUE	UP	ENSG00000148200.17		NBPF1-203	1.49712	2.38	0.738758	3.22162	0.00127468	0.0116809	TRUE	UP	ENST00000430580.6
ZNF738	0.911124	2.19739	0.856763	2.56475	0.0103249	0.0459146	TRUE	UP	ENSG00000172687.14		CCDC14-203	1.2217	2.37913	0.782527	3.04032	0.00236329	0.0188437	TRUE	UP	ENST00000409697.8
MEN1	1.62784	2.19693	0.688812	3.18945	0.00142545	0.00966362	TRUE	UP	ENSG00000133895.18		SESN1-204	0.795238	2.37786	0.875031	2.71746	0.00657845	0.0402472	TRUE	UP	ENST00000436639.7
AGO1	2.3748	2.19626	0.569299	3.85783	0.000114399	0.00121133	TRUE	UP	ENSG00000092847.14		SOX4-201	9.66846	2.3774	0.287242	8.27664	1.267e-16	1.70452e-14	TRUE	UP	ENST00000244745.4
SETX	3.47694	2.19424	0.475635	4.61328	3.96358e-06	7.23205e-05	TRUE	UP	ENSG00000107290.14		GINM1-201	3.45599	2.37311	0.492239	4.82105	1.42806e-06	3.85882e-05	TRUE	UP	ENST00000367419.10
POLG	1.43903	2.19415	0.740398	2.96348	0.00304185	0.0176816	TRUE	UP	ENSG00000140521.18		TBC1D9-201	1.11156	2.37282	0.786402	3.01731	0.00255027	0.0199818	TRUE	UP	ENST00000442267.3
HAGH	0.864088	2.18828	0.854681	2.56035	0.0104566	0.0462881	TRUE	UP	ENSG00000063854.13		ENST00000667970	0.785241	2.37228	0.88491	2.68082	0.00734428	0.0440378	TRUE	UP	ENST00000667970.1
PLEKHJ1	1.2807	2.18641	0.748408	2.92142	0.00348442	0.0198154	TRUE	UP	ENSG00000104886.12		TICRR-201	2.55079	2.37213	0.563143	4.21231	2.52771e-05	0.00046733	TRUE	UP	ENST00000268138.12
SLC25A26	1.27819	2.18598	0.767144	2.84951	0.00437868	0.023751	TRUE	UP	ENSG00000144741.19		HSD17B12-201	6.69155	2.3712	0.344701	6.879	6.02736e-12	4.64768e-10	TRUE	UP	ENST00000278353.10
ZMAT3	1.61754	2.18573	0.702105	3.1131	0.00185131	0.0119916	TRUE	UP	ENSG00000172667.11		DENND11-202	0.787699	2.36878	0.897954	2.63798	0.00834015	0.0484918	TRUE	UP	ENST00000536163.6
KIF5C	0.877922	2.18289	0.834211	2.61672	0.00887803	0.040898	TRUE	UP	ENSG00000168280.18		RAB3GAP1-201	1.4469	2.36423	0.72961	3.2404	0.00119363	0.0110909	TRUE	UP	ENST00000264158.13
TTC13	1.87081	2.18223	0.643623	3.39054	0.00069755	0.00546331	TRUE	UP	ENSG00000143643.13		CNOT7-207	0.819997	2.36078	0.896626	2.63296	0.00846445	0.048922	TRUE	UP	ENST00000519998.1
HSF2	1.33605	2.18122	0.736035	2.96348	0.00304185	0.0176816	TRUE	UP	ENSG00000025156.13		FBXL5-212	1.11462	2.35971	0.781683	3.01876	0.00253813	0.0199361	TRUE	UP	ENST00000514541.1
RAD54L	1.10679	2.18094	0.798378	2.73171	0.00630072	0.031576	TRUE	UP	ENSG00000085999.13		BTG2-201	1.78126	2.35896	0.687081	3.4333	0.00059628	0.00639572	TRUE	UP	ENST00000290551.5
RPS6KB1	1.31792	2.17895	0.758778	2.87166	0.00408327	0.0225057	TRUE	UP	ENSG00000108443.14		UBE2G2-202	2.21789	2.35863	0.607232	3.88423	0.000102654	0.00152305	TRUE	UP	ENST00000345496.7
TICRR	2.0352	2.17708	0.624947	3.48362	0.000494679	0.00415594	TRUE	UP	ENSG00000140534.14		BRD2-204	1.12613	2.35833	0.777518	3.03315	0.00242012	0.0192121	TRUE	UP	ENST00000449025.5
PRMT2	2.51892	2.17279	0.544652	3.98932	6.62633e-05	0.000785526	TRUE	UP	ENSG00000160310.19		ANKRD46-201	0.919948	2.35663	0.84196	2.79898	0.00512641	0.0337321	TRUE	UP	ENST00000335659.7
MCM3AP	1.51842	2.16818	0.709701	3.05507	0.0022501	0.0139136	TRUE	UP	ENSG00000160294.11		ENTPD7-201	1.42367	2.35592	0.729861	3.22791	0.001247	0.0115022	TRUE	UP	ENST00000370489.5
TMCC1	1.90513	2.16578	0.66399	3.26176	0.00110721	0.0078925	TRUE	UP	ENSG00000172765.19		GP6-AS1-204	1.06454	2.35489	0.795892	2.95881	0.00308827	0.0229875	TRUE	UP	ENST00000690314.1
FZD3	0.905142	2.15848	0.842517	2.56194	0.0104088	0.0461233	TRUE	UP	ENSG00000104290.11		KIF3A-202	1.46311	2.3545	0.732981	3.21223	0.00131709	0.0119483	TRUE	UP	ENST00000378746.8
ENSG00000273748	1.03487	2.15624	0.794356	2.71445	0.00663856	0.0327981	TRUE	UP	ENSG00000273748.1		AGO1-201	1.19678	2.3535	0.788243	2.98576	0.00282876	0.0216279	TRUE	UP	ENST00000373204.6
TRNAU1AP	2.04506	2.1558	0.605764	3.55881	0.000372545	0.00328661	TRUE	UP	ENSG00000180098.9		CD2BP2-201	2.2207	2.35231	0.603423	3.89829	9.68758e-05	0.00145325	TRUE	UP	ENST00000305596.8
LRP1B	0.994515	2.15324	0.806679	2.66927	0.00760169	0.0362188	TRUE	UP	ENSG00000168702.18		NASP-201	3.86778	2.35121	0.450729	5.21645	1.82382e-07	6.00626e-06	TRUE	UP	ENST00000350030.8
PAN3	2.16301	2.15246	0.622529	3.4576	0.000545005	0.00447756	TRUE	UP	ENSG00000152520.14		MAGEF1-201	1.98413	2.34936	0.643611	3.65028	0.000261951	0.00330602	TRUE	UP	ENST00000317897.5
WARS2-AS1	2.14735	2.14814	0.603893	3.55715	0.000374895	0.00330066	TRUE	UP	ENSG00000231365.7		ENST00000564771	0.752671	2.34666	0.887997	2.64265	0.0082261	0.0479831	TRUE	UP	ENST00000564771.1
SERINC1	8.15251	2.14181	0.302011	7.09182	1.32355e-12	7.69867e-11	TRUE	UP	ENSG00000111897.7		NIPAL3-201	0.926081	2.34381	0.842865	2.78077	0.00542309	0.0350448	TRUE	UP	ENST00000003912.7
KLHL15	1.05464	2.14101	0.790204	2.70944	0.00673967	0.0332036	TRUE	UP	ENSG00000174010.10		MLXIP-201	1.38707	2.34359	0.737954	3.1758	0.00149426	0.0132142	TRUE	UP	ENST00000319080.12
FAM3A	1.33699	2.14034	0.747648	2.86277	0.00419961	0.0230016	TRUE	UP	ENSG00000071889.17		ANKRD26-202	0.971551	2.33756	0.840672	2.78059	0.00542604	0.0350448	TRUE	UP	ENST00000436985.7
SESN2	1.94417	2.13539	0.609511	3.50344	0.00045929	0.00389058	TRUE	UP	ENSG00000130766.5		POGK-202	0.959705	2.33548	0.828557	2.81873	0.00482144	0.0322773	TRUE	UP	ENST00000367876.9
ENSG00000276256	1.59343	2.13475	0.713696	2.99112	0.00277954	0.016342	TRUE	UP	ENSG00000276256.1		BSDC1-201	1.90703	2.33455	0.65043	3.58924	0.000331642	0.00402104	TRUE	UP	ENST00000341071.11
TBC1D9	1.02271	2.13274	0.796811	2.67659	0.00743754	0.0357111	TRUE	UP	ENSG00000109436.8		CCNB1IP1-202	1.14874	2.33367	0.793398	2.94137	0.00326768	0.0240951	TRUE	UP	ENST00000358932.9
C2orf49-DT	1.30597	2.13196	0.747995	2.85023	0.00436872	0.0237194	TRUE	UP	ENSG00000272994.2		OAT-201	6.66035	2.33171	0.345816	6.74263	1.5555e-11	1.12405e-09	TRUE	UP	ENST00000368845.6
PGAP1	1.05314	2.12769	0.796065	2.67276	0.0075229	0.0359854	TRUE	UP	ENSG00000197121.15		SIPA1L3-201	1.15847	2.33017	0.773862	3.01109	0.00260314	0.0202829	TRUE	UP	ENST00000222345.11
IFT43	1.25086	2.12763	0.779768	2.72855	0.00636137	0.0318251	TRUE	UP	ENSG00000119650.13		GINM1-203	1.56323	2.32831	0.713716	3.26224	0.00110535	0.0103697	TRUE	UP	ENST00000650599.1
TMEM177	1.35652	2.12669	0.743888	2.85889	0.00425128	0.0232408	TRUE	UP	ENSG00000144120.13		IVD-215	0.99714	2.32523	0.840794	2.76552	0.00568327	0.0362434	TRUE	UP	ENST00000651168.1
EXOSC6	3.19741	2.1266	0.498913	4.26247	2.02177e-05	0.00029647	TRUE	UP	ENSG00000223496.3		HEATR6-201	0.914709	2.31831	0.851332	2.72315	0.00646624	0.0398753	TRUE	UP	ENST00000184956.11
SNAPC4	2.11071	2.12309	0.6059	3.50403	0.000458281	0.00388581	TRUE	UP	ENSG00000165684.6		ZER1-201	1.39893	2.31166	0.734159	3.14872	0.00163989	0.0142628	TRUE	UP	ENST00000291900.7
MAK	0.862715	2.12292	0.840418	2.52603	0.0115361	0.0497367	TRUE	UP	ENSG00000111837.12		DYNLT1-203	12.0044	2.3091	0.259033	8.9143	4.90919e-19	8.74389e-17	TRUE	UP	ENST00000367089.8
BTG2	1.84223	2.11864	0.650522	3.25683	0.00112665	0.00797245	TRUE	UP	ENSG00000159388.6		UBXN4-201	5.48508	2.30822	0.376905	6.12414	9.11728e-10	4.82343e-08	TRUE	UP	ENST00000272638.14
PHKG2	1.22624	2.11206	0.757849	2.78691	0.00532128	0.0277363	TRUE	UP	ENSG00000156873.16		ANAPC5-213	1.15727	2.30622	0.801551	2.8772	0.00401224	0.027948	TRUE	UP	ENST00000538334.1
FEM1B	1.07208	2.11156	0.817843	2.58187	0.00982675	0.0443234	TRUE	UP	ENSG00000169018.6		C2orf49-DT-201	1.37427	2.30301	0.740633	3.10951	0.00187396	0.0157254	TRUE	UP	ENST00000610036.2
OAT	7.38477	2.11113	0.316368	6.67301	2.50604e-11	1.26389e-09	TRUE	UP	ENSG00000065154.12		EPC1-203	0.910961	2.29906	0.86467	2.65889	0.0078398	0.0462416	TRUE	UP	ENST00000375110.6
ATG2B	1.2534	2.10842	0.748182	2.81805	0.00483157	0.0257516	TRUE	UP	ENSG00000066739.12		LINC00910-202	1.07338	2.29845	0.784026	2.9316	0.00337216	0.0246214	TRUE	UP	ENST00000586231.1
PPM1D	2.11264	2.10436	0.619699	3.39578	0.000684337	0.00538885	TRUE	UP	ENSG00000170836.13		RAMACL-201	1.06403	2.29741	0.800113	2.87135	0.00408721	0.0283838	TRUE	UP	ENST00000444122.3
HSPA1B	3.72491	2.10096	0.440937	4.76477	1.8907e-06	3.80978e-05	TRUE	UP	ENSG00000204388.7		ANKRD36B-202	0.947939	2.29328	0.828121	2.76925	0.00561847	0.0359025	TRUE	UP	ENST00000359901.9
SNAP47	1.8937	2.09888	0.619876	3.38597	0.000709267	0.00554015	TRUE	UP	ENSG00000143740.15		SLC37A3-201	0.841262	2.28768	0.855714	2.67341	0.00750844	0.0449157	TRUE	UP	ENST00000326232.14
MAN2B2	1.00033	2.09837	0.801274	2.61879	0.00882419	0.0407145	TRUE	UP	ENSG00000013288.9		USPL1-201	0.870402	2.28705	0.85675	2.66945	0.00759761	0.0451926	TRUE	UP	ENST00000255304.9
VPS26C	1.46024	2.09511	0.702717	2.98144	0.00286897	0.0168451	TRUE	UP	ENSG00000157538.14		UBE3A-226	0.877457	2.28352	0.851409	2.68204	0.00731736	0.0439598	TRUE	UP	ENST00000648336.2
PCNX4	2.7971	2.09426	0.521765	4.0138	5.97498e-05	0.000720051	TRUE	UP	ENSG00000126773.13		F2R-201	0.868107	2.28351	0.867827	2.63129	0.0085061	0.0490663	TRUE	UP	ENST00000319211.5
CCDC18-AS1	1.71228	2.09352	0.672025	3.11524	0.00183797	0.0119318	TRUE	UP	ENSG00000223745.8		MT1X-201	3.46072	2.2829	0.474092	4.81531	1.46973e-06	3.94613e-05	TRUE	UP	ENST00000394485.5
MDM2	2.77792	2.09324	0.536527	3.90146	9.56153e-05	0.00104673	TRUE	UP	ENSG00000135679.27		ENST00000559668	1.58906	2.28154	0.697587	3.27061	0.00107316	0.0101126	TRUE	UP	ENST00000559668.5
SEPHS2	3.75041	2.08184	0.446379	4.66383	3.10371e-06	5.89975e-05	TRUE	UP	ENSG00000179918.19		ALG10B-201	2.13133	2.27716	0.612147	3.71995	0.000199262	0.00263584	TRUE	UP	ENST00000308742.9
KIF3A	2.73526	2.08078	0.524683	3.96579	7.31527e-05	0.000852145	TRUE	UP	ENSG00000131437.16		TSTD3-202	1.07208	2.27509	0.79695	2.85475	0.00430706	0.0295054	TRUE	UP	ENST00000607332.2
FBN2	1.19084	2.08045	0.78667	2.64464	0.0081779	0.0382709	TRUE	UP	ENSG00000138829.14		RBM4-202	1.1954	2.27277	0.80666	2.81751	0.00483979	0.0323317	TRUE	UP	ENST00000396053.9
ARL6IP6	3.23658	2.07727	0.479765	4.32976	1.4927e-05	0.000225716	TRUE	UP	ENSG00000177917.12		KIF1B-205	0.905043	2.2718	0.853145	2.66285	0.0077481	0.045795	TRUE	UP	ENST00000377093.9
GTPBP3	3.20588	2.07718	0.476113	4.36278	1.28421e-05	0.000197964	TRUE	UP	ENSG00000130299.17		CYP3A5-211	1.11188	2.26785	0.817333	2.7747	0.00552534	0.0354687	TRUE	UP	ENST00000473347.1
ARMT1	3.70102	2.06773	0.442971	4.66786	3.04355e-06	5.79803e-05	TRUE	UP	ENSG00000146476.11		CCDC138-202	0.89724	2.26599	0.840274	2.69673	0.00700249	0.0424835	TRUE	UP	ENST00000409529.6
GMEB1	1.0396	2.06678	0.806337	2.56317	0.0103721	0.0460308	TRUE	UP	ENSG00000162419.13		RRAGC-201	1.31253	2.26562	0.757132	2.99237	0.00276817	0.0213063	TRUE	UP	ENST00000373001.4
LRIG2	1.88506	2.05951	0.651294	3.16218	0.00156592	0.0104535	TRUE	UP	ENSG00000198799.12		USP11-204	2.18271	2.26497	0.603688	3.75189	0.000175506	0.0023536	TRUE	UP	ENST00000377107.7
ACVR2B	1.06479	2.05938	0.79699	2.58394	0.00976777	0.0441803	TRUE	UP	ENSG00000114739.14		UPF3B-201	1.89476	2.26456	0.666813	3.3961	0.000683543	0.00712711	TRUE	UP	ENST00000276201.7
PBX3	2.17476	2.05576	0.577351	3.56068	0.000369899	0.00327059	TRUE	UP	ENSG00000167081.18		FAM228B-202	1.123	2.26316	0.806527	2.80606	0.00501512	0.0332222	TRUE	UP	ENST00000461972.5
SHPRH	3.38412	2.05412	0.462667	4.43974	9.00694e-06	0.000146615	TRUE	UP	ENSG00000146414.17		IP6K2-201	1.83887	2.26094	0.650593	3.4752	0.000510472	0.00565769	TRUE	UP	ENST00000328631.10
YEATS2	1.29369	2.0525	0.749737	2.73762	0.00618847	0.0311566	TRUE	UP	ENSG00000163872.16		BRD2-208	1.77411	2.25711	0.658656	3.42684	0.000610651	0.00651671	TRUE	UP	ENST00000464592.6
TMF1	1.23055	2.05208	0.765305	2.68139	0.00733163	0.0353612	TRUE	UP	ENSG00000144747.17		SETD1A-201	1.09471	2.25564	0.800559	2.81758	0.00483873	0.0323317	TRUE	UP	ENST00000262519.14
PKN1	1.21592	2.05162	0.765778	2.67913	0.00738127	0.0355613	TRUE	UP	ENSG00000123143.13		WTAP-208	1.55873	2.25497	0.725672	3.10743	0.00188725	0.0157845	TRUE	UP	ENST00000650096.1
INSR	1.34625	2.05141	0.746819	2.74686	0.00601685	0.0305393	TRUE	UP	ENSG00000171105.14		TSPYL4-201	1.66167	2.25164	0.676564	3.32805	0.000874551	0.00864029	TRUE	UP	ENST00000420283.3
TSPYL4	1.53406	2.04851	0.691089	2.96417	0.00303502	0.0176773	TRUE	UP	ENSG00000187189.11		SERINC1-201	8.37047	2.24715	0.302156	7.43707	1.0294e-13	9.93726e-12	TRUE	UP	ENST00000339697.5
NAPEPLD	1.19181	2.04816	0.764992	2.67737	0.00742033	0.0356707	TRUE	UP	ENSG00000161048.12		NUP62CL-201	1.20835	2.24701	0.789894	2.8447	0.00444528	0.0303046	TRUE	UP	ENST00000372466.8
INSIG2	1.13174	2.04568	0.769564	2.65824	0.00785501	0.0372068	TRUE	UP	ENSG00000125629.16		ABHD17C-201	1.06088	2.24502	0.812337	2.76365	0.0057158	0.036352	TRUE	UP	ENST00000258884.5
LATS1	1.27385	2.04448	0.76788	2.6625	0.0077562	0.0368388	TRUE	UP	ENSG00000131023.13		TICRR-202	1.02952	2.24437	0.819502	2.7387	0.00616829	0.0385016	TRUE	UP	ENST00000560985.5
STK33	1.18553	2.04287	0.752315	2.71545	0.00661863	0.0327367	TRUE	UP	ENSG00000130413.16		PDCD5-203	0.939929	2.24387	0.853951	2.62763	0.00859812	0.0494235	TRUE	UP	ENST00000419343.7
SNX25	1.31126	2.04191	0.766531	2.66384	0.00772547	0.0367328	TRUE	UP	ENSG00000109762.17		TMEM179B-201	1.18544	2.24016	0.766865	2.92119	0.00348692	0.02514	TRUE	UP	ENST00000333449.9
SLC37A3	2.07964	2.03955	0.586932	3.47493	0.000510983	0.00425819	TRUE	UP	ENSG00000157800.18		H2AC25-201	2.63112	2.23979	0.545622	4.10503	4.04267e-05	0.000692732	TRUE	UP	ENST00000366695.3
CHST10	1.02943	2.03717	0.802273	2.53924	0.0111093	0.04844	TRUE	UP	ENSG00000115526.11		PPP1R3D-201	1.10644	2.23956	0.812409	2.75669	0.00583901	0.036957	TRUE	UP	ENST00000370996.5
CCNDBP1	2.66206	2.03598	0.52433	3.88301	0.000103172	0.00111408	TRUE	UP	ENSG00000166946.14		HOXA11-201	1.05624	2.23941	0.805035	2.78175	0.00540665	0.035015	TRUE	UP	ENST00000006015.4
ATG4B	2.73822	2.03588	0.550867	3.69578	0.000219212	0.0021275	TRUE	UP	ENSG00000168397.17		BRD4-202	1.08847	2.23801	0.795248	2.81423	0.00488939	0.0325771	TRUE	UP	ENST00000360016.9
MFSD14CP	3.46872	2.03082	0.466508	4.35323	1.34144e-05	0.000205334	TRUE	UP	ENSG00000290770.1		ILRUN-202	1.10817	2.23738	0.785032	2.85005	0.00437123	0.0298481	TRUE	UP	ENST00000374023.8
PRXL2A	1.16466	2.0287	0.769654	2.63585	0.00839259	0.0390952	TRUE	UP	ENSG00000122378.14		ZNF721-205	1.02172	2.23566	0.799839	2.79514	0.00518779	0.0339394	TRUE	UP	ENST00000511833.3
LINC01515	2.03936	2.02415	0.610464	3.31576	0.000913943	0.00679229	TRUE	UP	ENSG00000228065.13		MYO9A-201	1.42595	2.23482	0.711159	3.1425	0.00167511	0.0144589	TRUE	UP	ENST00000356056.10
CCDC82	0.978076	2.02336	0.799204	2.53172	0.0113506	0.0492462	TRUE	UP	ENSG00000149231.16		COL6A1-201	1.23605	2.23403	0.755391	2.95745	0.00310193	0.0230747	TRUE	UP	ENST00000361866.8
TYK2	2.55288	2.0218	0.524009	3.85833	0.000114166	0.00121032	TRUE	UP	ENSG00000105397.15		MTIF3-202	1.10787	2.23155	0.798465	2.7948	0.00519312	0.0339567	TRUE	UP	ENST00000381120.8
GPR155	1.1828	2.0155	0.791945	2.545	0.0109278	0.0478639	TRUE	UP	ENSG00000163328.14		ENST00000665278	1.63812	2.23044	0.693843	3.21461	0.00130622	0.0118886	TRUE	UP	ENST00000665278.1
SATB2	1.27107	2.01373	0.775591	2.59638	0.00942108	0.0428566	TRUE	UP	ENSG00000119042.18		MAP3K2-203	3.47957	2.23039	0.47778	4.66822	3.03813e-06	7.53338e-05	TRUE	UP	ENST00000682094.1
MLXIP	1.70634	2.01368	0.660399	3.04919	0.00229461	0.0141188	TRUE	UP	ENSG00000175727.14		CLCN3-208	1.71446	2.23012	0.656135	3.39888	0.000676631	0.00708334	TRUE	UP	ENST00000513761.6
PTER	1.18833	2.01304	0.777328	2.5897	0.00960605	0.0435391	TRUE	UP	ENSG00000165983.15		LINC00632-210	1.09984	2.22891	0.793993	2.80721	0.00499728	0.0331588	TRUE	UP	ENST00000648200.2
UBR4	3.91745	2.00615	0.431972	4.64416	3.41466e-06	6.37963e-05	TRUE	UP	ENSG00000127481.15		NASP-224	2.4658	2.22301	0.569908	3.90065	9.59335e-05	0.00144083	TRUE	UP	ENST00000537798.5
QKI	5.9493	2.00483	0.346138	5.79201	6.95498e-09	2.32499e-07	TRUE	UP	ENSG00000112531.17		SESN2-201	1.96119	2.21515	0.612286	3.61783	0.000297078	0.00365538	TRUE	UP	ENST00000253063.4
ARL6	1.26045	2.00147	0.771689	2.59363	0.009497	0.0431569	TRUE	UP	ENSG00000113966.11		PAPOLG-201	1.03933	2.21218	0.80033	2.76408	0.00570831	0.0363461	TRUE	UP	ENST00000238714.8
PIGP	2.88198	2.00122	0.502305	3.98406	6.77468e-05	0.000799852	TRUE	UP	ENSG00000185808.14		OPHN1-201	3.72976	2.21134	0.448283	4.93291	8.10134e-07	2.31155e-05	TRUE	UP	ENST00000355520.6
ZNF254	1.14382	1.99642	0.774968	2.57613	0.00999141	0.0448768	TRUE	UP	ENSG00000213096.11		ZNF107-212	1.04852	2.20897	0.799324	2.76356	0.00571754	0.036352	TRUE	UP	ENST00000684016.1
TBP	2.56399	1.99501	0.536186	3.72074	0.000198643	0.00194519	TRUE	UP	ENSG00000112592.15		IRAK1BP1-201	2.31807	2.20848	0.572824	3.85542	0.000115531	0.00166213	TRUE	UP	ENST00000369940.7
ING5	2.29266	1.99467	0.563776	3.53806	0.000403085	0.00349942	TRUE	UP	ENSG00000168395.16		C21orf91-201	1.19416	2.20522	0.771125	2.85975	0.00423978	0.0291235	TRUE	UP	ENST00000284881.9
PLCG1	1.20566	1.99363	0.777631	2.56372	0.0103556	0.0460045	TRUE	UP	ENSG00000124181.15		PLXNA1-201	1.16385	2.20188	0.804407	2.73727	0.00619513	0.038612	TRUE	UP	ENST00000393409.3
JMY	1.33231	1.99343	0.773365	2.57761	0.00994859	0.0447511	TRUE	UP	ENSG00000152409.9		TMEM50B-201	1.50614	2.20101	0.710476	3.09794	0.0019487	0.0161586	TRUE	UP	ENST00000420455.5
MAP3K3	1.84493	1.99174	0.620682	3.20895	0.00133219	0.00913119	TRUE	UP	ENSG00000198909.8		CNKSR3-205	2.07529	2.20052	0.611035	3.60129	0.000316637	0.00386132	TRUE	UP	ENST00000607772.6
RANBP3	1.43846	1.98798	0.707625	2.80937	0.00496387	0.0263281	TRUE	UP	ENSG00000031823.14		SEPHS2-201	3.84985	2.19896	0.445619	4.93461	8.03095e-07	2.29983e-05	TRUE	UP	ENST00000478753.5
PRRC2B	2.43983	1.98743	0.552393	3.59785	0.000320857	0.00289801	TRUE	UP	ENSG00000288701.1		TNKS-201	1.02239	2.19879	0.800533	2.74666	0.00602054	0.0377553	TRUE	UP	ENST00000310430.11
SNHG12	1.1387	1.98734	0.774521	2.5659	0.0102909	0.0458101	TRUE	UP	ENSG00000197989.15		SEPSECS-AS1-201	1.78063	2.19053	0.661503	3.31144	0.000928162	0.00900118	TRUE	UP	ENST00000507794.2
CAPRIN2	1.18149	1.98207	0.777037	2.5508	0.0107476	0.0471931	TRUE	UP	ENSG00000110888.19		PEG10-208	2.00726	2.18958	0.629987	3.4756	0.000509716	0.0056564	TRUE	UP	ENST00000615790.5
LRRK1	1.1466	1.98181	0.770186	2.57316	0.0100774	0.0450922	TRUE	UP	ENSG00000154237.13		ENST00000559989	1.47648	2.1805	0.72249	3.01803	0.00254422	0.0199576	TRUE	UP	ENST00000559989.1
MAU2	2.07716	1.97636	0.603605	3.27426	0.00105938	0.00762091	TRUE	UP	ENSG00000129933.21		SECISBP2L-209	1.11522	2.17858	0.791278	2.75324	0.00590079	0.0372059	TRUE	UP	ENST00000559471.6
ZNF567	1.19666	1.97602	0.759169	2.60287	0.00924471	0.0422169	TRUE	UP	ENSG00000189042.14		KYAT3-201	1.22584	2.17582	0.759164	2.86607	0.00415603	0.0287427	TRUE	UP	ENST00000260508.9
ANKRD36	5.19519	1.97541	0.381745	5.17467	2.28309e-07	5.70772e-06	TRUE	UP	ENSG00000135976.21		ACVR2B-201	1.09588	2.17367	0.794683	2.73527	0.00623292	0.0388092	TRUE	UP	ENST00000352511.5
GABRE	5.27859	1.96704	0.370611	5.30757	1.11094e-07	3.02904e-06	TRUE	UP	ENSG00000102287.19		CDK2AP1-212	1.0279	2.16591	0.82245	2.63348	0.00845141	0.0488753	TRUE	UP	ENST00000652466.1
RAD51B	1.61963	1.9669	0.662328	2.96968	0.00298107	0.0174035	TRUE	UP	ENSG00000182185.19		HMCES-201	1.73586	2.16221	0.656996	3.29106	0.000998094	0.0095693	TRUE	UP	ENST00000383463.9
WEE1	2.06762	1.96316	0.580492	3.38189	0.000719882	0.00560801	TRUE	UP	ENSG00000166483.12		JMY-201	1.4207	2.16106	0.738563	2.92603	0.00343316	0.0249372	TRUE	UP	ENST00000396137.5
CEP89	1.98144	1.95746	0.628461	3.11468	0.00184143	0.0119365	TRUE	UP	ENSG00000121289.18		RNF168-201	1.29484	2.15963	0.751614	2.87332	0.00406183	0.0282541	TRUE	UP	ENST00000318037.3
FOXO3	3.01283	1.95641	0.49921	3.919	8.89159e-05	0.00098716	TRUE	UP	ENSG00000118689.15		GOLGA8B-211	1.0726	2.15689	0.795662	2.71081	0.00671191	0.0410043	TRUE	UP	ENST00000683415.1
RPA2	5.58998	1.94652	0.353265	5.51006	3.58704e-08	1.06091e-06	TRUE	UP	ENSG00000117748.10		GAN-203	1.04502	2.15001	0.801303	2.68314	0.00729335	0.0438572	TRUE	UP	ENST00000648994.2
CRLF3	1.83455	1.94623	0.626267	3.10767	0.00188569	0.0121432	TRUE	UP	ENSG00000176390.12		AGAP6-205	1.49232	2.14928	0.708858	3.03203	0.00242915	0.0192596	TRUE	UP	ENST00000618171.5
MFSD8	1.82426	1.94591	0.62368	3.12005	0.00180823	0.0117825	TRUE	UP	ENSG00000164073.11		PSPC1-201	2.72556	2.14802	0.520412	4.12754	3.66666e-05	0.000636931	TRUE	UP	ENST00000338910.9
SETD6	1.80154	1.94574	0.645257	3.01545	0.002566	0.0154084	TRUE	UP	ENSG00000103037.12		TRMT13-204	1.07149	2.14223	0.799667	2.6789	0.00738652	0.0442282	TRUE	UP	ENST00000482437.5
EPS15L1	2.04028	1.93821	0.5889	3.29124	0.000997474	0.00724058	TRUE	UP	ENSG00000127527.14		TNFRSF10D-201	1.27487	2.14105	0.763114	2.80567	0.00502116	0.0332448	TRUE	UP	ENST00000312584.4
SCAPER	2.23746	1.93407	0.570557	3.38979	0.00069947	0.00546853	TRUE	UP	ENSG00000140386.13		DCBLD2-201	1.0776	2.14051	0.80458	2.6604	0.00780476	0.0460779	TRUE	UP	ENST00000326840.11
SGCB	3.20125	1.93297	0.465077	4.15623	3.23536e-05	0.000437104	TRUE	UP	ENSG00000163069.13		C6orf120-201	3.77335	2.13923	0.443878	4.81941	1.43987e-06	3.88242e-05	TRUE	UP	ENST00000332290.4
RALGAPA1	2.46714	1.93244	0.536734	3.60038	0.000317753	0.0028793	TRUE	UP	ENSG00000174373.17		LATS1-207	1.26366	2.13525	0.768068	2.78002	0.0054355	0.035088	TRUE	UP	ENST00000543571.6
GARNL3	1.40907	1.92994	0.719917	2.68078	0.0073451	0.0354066	TRUE	UP	ENSG00000136895.19		TMEM242-202	3.13938	2.13365	0.500928	4.2594	2.04978e-05	0.000392156	TRUE	UP	ENST00000400788.9
MIR924HG	1.36695	1.92984	0.722251	2.67198	0.00754058	0.0360304	TRUE	UP	ENSG00000267374.3		IDS-201	1.02239	2.13271	0.801433	2.66112	0.00778818	0.0460016	TRUE	UP	ENST00000340855.11
PTPRA	1.83878	1.92398	0.636566	3.02243	0.00250751	0.01513	TRUE	UP	ENSG00000132670.21		UBE2A-214	1.63747	2.13167	0.66611	3.20018	0.00137343	0.0123747	TRUE	UP	ENST00000696539.1
MEIS2	2.83243	1.91579	0.491903	3.89466	9.8337e-05	0.00106707	TRUE	UP	ENSG00000134138.22		PHACTR4-202	3.38569	2.12987	0.465037	4.58	4.64972e-06	0.000108543	TRUE	UP	ENST00000373839.8
NAA30	2.0034	1.91398	0.586989	3.26068	0.00111145	0.00790337	TRUE	UP	ENSG00000139977.14		ACIN1-206	1.03738	2.12651	0.802966	2.64832	0.00808919	0.0474251	TRUE	UP	ENST00000473758.5
CENPC	3.02105	1.91246	0.518021	3.69185	0.000222631	0.0021535	TRUE	UP	ENSG00000145241.11		ARHGEF35-AS1-209	1.22532	2.123	0.759386	2.79568	0.00517909	0.0339351	TRUE	UP	ENST00000650250.1
INPP4A	2.23395	1.91051	0.565142	3.38059	0.000723307	0.00561983	TRUE	UP	ENSG00000040933.16		TCEAL8-201	1.71359	2.12019	0.682043	3.10858	0.00187987	0.0157639	TRUE	UP	ENST00000360000.8
ANKRD36B	4.57923	1.90607	0.38781	4.91496	8.8802e-07	1.99177e-05	TRUE	UP	ENSG00000196912.13		CDC25C-201	1.42582	2.1054	0.714831	2.94531	0.00322631	0.0238457	TRUE	UP	ENST00000323760.11
PAQR3	1.54918	1.90341	0.67688	2.81204	0.00492281	0.0261899	TRUE	UP	ENSG00000163291.14		PLS3-208	12.4346	2.10382	0.243864	8.62705	6.29542e-18	1.00775e-15	TRUE	UP	ENST00000539310.5
WBP2	2.19295	1.9022	0.581029	3.27384	0.00106098	0.00762525	TRUE	UP	ENSG00000132471.12		ATG2B-202	1.21424	2.10177	0.755621	2.78151	0.00541062	0.0350167	TRUE	UP	ENST00000359933.6
SLC16A1-AS1	4.29715	1.90009	0.407493	4.66289	3.11802e-06	5.91406e-05	TRUE	UP	ENSG00000226419.8		FEM1B-201	2.22547	2.09989	0.586724	3.579	0.000344906	0.00414214	TRUE	UP	ENST00000306917.5
PHF2	1.36545	1.89955	0.724792	2.62082	0.00877194	0.0406022	TRUE	UP	ENSG00000197724.11		PABIR2-203	2.28598	2.09723	0.568202	3.69099	0.00022338	0.00288841	TRUE	UP	ENST00000370790.5
COPS7B	1.24188	1.89752	0.750223	2.52928	0.0114297	0.0494908	TRUE	UP	ENSG00000144524.18		RPA2-203	5.58921	2.09475	0.360384	5.81254	6.15319e-09	2.74958e-07	TRUE	UP	ENST00000373912.8
SECISBP2L	1.64422	1.89651	0.662036	2.86466	0.00417461	0.0228791	TRUE	UP	ENSG00000138593.9		SNORD3B-2-201	1.65566	2.09223	0.667385	3.13497	0.00171873	0.0147057	TRUE	UP	ENST00000571722.3
ARID4A	2.05598	1.8947	0.612276	3.09452	0.00197134	0.0125622	TRUE	UP	ENSG00000032219.19		CNNM3-201	1.45975	2.09097	0.714009	2.9285	0.00340604	0.0247829	TRUE	UP	ENST00000305510.4
PLS3	41.7265	1.89197	0.129433	14.6173	2.17765e-48	1.26667e-45	TRUE	UP	ENSG00000102024.19		CENPC-201	1.42545	2.09034	0.737252	2.83531	0.00457806	0.030976	TRUE	UP	ENST00000273853.11
BBS7	1.97068	1.88479	0.621154	3.03433	0.00241067	0.0146879	TRUE	UP	ENSG00000138686.10		KYAT3-203	1.61928	2.08924	0.666487	3.1347	0.00172028	0.0147091	TRUE	UP	ENST00000370491.7
HTT	2.69951	1.88429	0.503589	3.74173	0.000182756	0.00180788	TRUE	UP	ENSG00000197386.14		FAM168B-201	1.89362	2.08838	0.621807	3.35857	0.000783477	0.00793263	TRUE	UP	ENST00000389915.4
TSPYL1	4.41512	1.88265	0.406223	4.63452	3.57775e-06	6.65584e-05	TRUE	UP	ENSG00000189241.8		MAZ-201	4.09777	2.08642	0.427191	4.88405	1.03931e-06	2.87596e-05	TRUE	UP	ENST00000219782.11
PCMT1	1.29735	1.87647	0.726509	2.58286	0.0097985	0.0442734	TRUE	UP	ENSG00000120265.21		TXNDC16-201	1.18352	2.0846	0.765872	2.72187	0.00649138	0.0398994	TRUE	UP	ENST00000281741.9
PI4K2B	2.51452	1.86915	0.51116	3.65668	0.000255505	0.00241265	TRUE	UP	ENSG00000038210.14		SHPRH-202	1.20993	2.0805	0.760212	2.73673	0.00620526	0.038656	TRUE	UP	ENST00000367505.6
ZDBF2	1.48954	1.86541	0.671071	2.77976	0.00543998	0.0281852	TRUE	UP	ENSG00000204186.10		TMEM18-201	1.17894	2.07609	0.763814	2.71806	0.0065666	0.0401942	TRUE	UP	ENST00000281017.8
RNF8	2.26196	1.86397	0.56355	3.30755	0.000941158	0.00694014	TRUE	UP	ENSG00000112130.17		S100PBP-202	1.36012	2.0754	0.717237	2.89361	0.0038084	0.0269042	TRUE	UP	ENST00000373475.10
TMEM50B	2.83763	1.85963	0.491282	3.78526	0.000153549	0.00156293	TRUE	UP	ENSG00000142188.17		SGCB-201	3.31564	2.07245	0.465895	4.44832	8.65454e-06	0.000186767	TRUE	UP	ENST00000381431.10
PHF8	2.58615	1.85889	0.51852	3.58499	0.000337093	0.00302898	TRUE	UP	ENSG00000172943.21		L3HYPDH-207	1.37429	2.07119	0.713943	2.90106	0.003719	0.0263835	TRUE	UP	ENST00000527981.1
NEIL3	2.13137	1.8546	0.560024	3.31165	0.000927478	0.00687532	TRUE	UP	ENSG00000109674.4		DOT1L-201	1.38014	2.06774	0.710821	2.90895	0.00362647	0.0259358	TRUE	UP	ENST00000398665.8
XIAP	6.17761	1.85446	0.332729	5.57349	2.49688e-08	7.53815e-07	TRUE	UP	ENSG00000101966.14		ENST00000619021	1.51134	2.0665	0.693641	2.9792	0.00289	0.0219107	TRUE	UP	ENST00000619021.4
HECTD1	3.85824	1.8515	0.420588	4.40217	1.07172e-05	0.000170323	TRUE	UP	ENSG00000092148.14		ALG2-203	1.87169	2.06645	0.666931	3.09844	0.00194543	0.0161576	TRUE	UP	ENST00000476832.2
EPB41	2.65745	1.85135	0.505826	3.66005	0.00025217	0.00238632	TRUE	UP	ENSG00000159023.23		REV3L-201	1.41391	2.06569	0.719764	2.86996	0.00410526	0.028431	TRUE	UP	ENST00000358835.7
DHX40	3.3647	1.85134	0.446204	4.14909	3.33793e-05	0.000444633	TRUE	UP	ENSG00000108406.10		ATP5PF-205	1.16129	2.06476	0.785749	2.62776	0.00859483	0.0494235	TRUE	UP	ENST00000400094.5
MYSM1	3.25666	1.84964	0.460582	4.01587	5.92267e-05	0.000714735	TRUE	UP	ENSG00000162601.12		ARID1B-218	1.19688	2.05827	0.775136	2.65536	0.00792229	0.0466681	TRUE	UP	ENST00000636748.1
LEMD3	2.26148	1.8357	0.545458	3.36543	0.000764247	0.0058543	TRUE	UP	ENSG00000174106.3		WEE1-202	1.3831	2.05637	0.712186	2.88741	0.00388432	0.0272441	TRUE	UP	ENST00000450114.7
RBPJ	2.2054	1.83454	0.554639	3.30764	0.000940872	0.00694014	TRUE	UP	ENSG00000168214.22		CPVL-201	1.13469	2.04646	0.770393	2.65638	0.00789847	0.046566	TRUE	UP	ENST00000265394.10
DNM2	3.10734	1.83334	0.477879	3.83642	0.000124843	0.00130763	TRUE	UP	ENSG00000079805.19		SCAF8-201	3.01951	2.04514	0.483138	4.23303	2.30565e-05	0.000435182	TRUE	UP	ENST00000367178.8
TMEM161B-DT	1.94914	1.83122	0.588374	3.11235	0.00185606	0.0120046	TRUE	UP	ENSG00000247828.10		REXO1-201	1.14057	2.04413	0.778423	2.62599	0.00863968	0.0495723	TRUE	UP	ENST00000170168.9
MAP2K4	1.60135	1.83055	0.673877	2.71644	0.00659875	0.032694	TRUE	UP	ENSG00000065559.15		TSPYL1-201	6.76196	2.04286	0.332854	6.13742	8.38709e-10	4.4942e-08	TRUE	UP	ENST00000368608.4
RMND1	2.49636	1.82958	0.531222	3.4441	0.000572963	0.00466999	TRUE	UP	ENSG00000155906.20		MED29-201	1.43539	2.04249	0.726865	2.81	0.00495419	0.0329394	TRUE	UP	ENST00000315588.11
MED29	2.39302	1.82901	0.551222	3.3181	0.000906322	0.00674715	TRUE	UP	ENSG00000063322.15		IRF2BPL-201	1.5378	2.04073	0.668354	3.05337	0.0022629	0.0182087	TRUE	UP	ENST00000238647.5
NBPF12	2.0244	1.82841	0.577074	3.16842	0.0015327	0.0102552	TRUE	UP	ENSG00000268043.9		DYRK2-202	1.12161	2.03807	0.772913	2.63687	0.00836759	0.0485397	TRUE	UP	ENST00000344096.4
ARIH1	2.02488	1.82047	0.608581	2.99133	0.00277769	0.016342	TRUE	UP	ENSG00000166233.15		BRD3-201	1.90972	2.03719	0.633641	3.21506	0.00130419	0.0118886	TRUE	UP	ENST00000303407.12
PPP4C	5.79398	1.81867	0.337742	5.38479	7.25305e-08	2.05464e-06	TRUE	UP	ENSG00000149923.14		CCDC28A-201	1.87457	2.03655	0.626279	3.25183	0.00114663	0.0107013	TRUE	UP	ENST00000617445.5
SFT2D1	11.0019	1.81622	0.248232	7.31661	2.54305e-13	1.60783e-11	TRUE	UP	ENSG00000198818.10		DCXR-201	1.32823	2.03634	0.737656	2.76056	0.00577032	0.0365955	TRUE	UP	ENST00000306869.7
PAK4	2.25201	1.80771	0.557375	3.24325	0.00118174	0.00828836	TRUE	UP	ENSG00000130669.17		CDK16-204	2.37198	2.03475	0.559427	3.63721	0.000275606	0.00342705	TRUE	UP	ENST00000457458.6
NBPF11	1.66375	1.80694	0.645662	2.79859	0.00513266	0.0270425	TRUE	UP	ENSG00000263956.8		GTF2H2-202	1.42697	2.03027	0.715524	2.83746	0.00454745	0.0308485	TRUE	UP	ENST00000330280.11
ZNF92	2.17183	1.80419	0.560392	3.21951	0.00128411	0.00889196	TRUE	UP	ENSG00000146757.14		RBM41-209	3.46034	2.02711	0.453736	4.46759	7.91068e-06	0.000173377	TRUE	UP	ENST00000685964.1
LINC02693	1.67144	1.8025	0.638847	2.82149	0.00478006	0.0255083	TRUE	UP	ENSG00000212719.15		TMEM181-202	2.60179	2.0231	0.524989	3.8536	0.000116392	0.0016702	TRUE	UP	ENST00000684151.1
DCP1A	3.13332	1.79872	0.457396	3.93254	8.40543e-05	0.000946288	TRUE	UP	ENSG00000272886.6		ABHD2-201	2.5365	2.02224	0.533222	3.79249	0.000149143	0.00207946	TRUE	UP	ENST00000352732.10
TSPAN6	5.5392	1.79421	0.351803	5.10004	3.39583e-07	8.32265e-06	TRUE	UP	ENSG00000000003.15		ATPAF1-211	1.64678	2.02014	0.677138	2.98335	0.00285108	0.0216936	TRUE	UP	ENST00000574428.6
ORC4	3.38426	1.78786	0.443821	4.02835	5.61696e-05	0.000684469	TRUE	UP	ENSG00000115947.14		ATP13A3-DT-207	1.17761	2.01984	0.769139	2.6261	0.00863694	0.0495723	TRUE	UP	ENST00000662856.1
NIN	1.92757	1.78307	0.593563	3.00401	0.00266448	0.0158147	TRUE	UP	ENSG00000100503.27		CDT1-201	2.41796	2.00359	0.553695	3.61859	0.000296217	0.00365538	TRUE	UP	ENST00000301019.9
PSPC1	3.36044	1.78297	0.440913	4.04381	5.25886e-05	0.00064899	TRUE	UP	ENSG00000121390.19		RPS3A-206	1.89238	1.99292	0.628252	3.17216	0.00151308	0.0133527	TRUE	UP	ENST00000507485.1
C12orf4	1.65954	1.78288	0.636312	2.80189	0.00508035	0.0267993	TRUE	UP	ENSG00000047621.12		PI4K2B-201	2.59021	1.99117	0.512821	3.88278	0.000103271	0.00152566	TRUE	UP	ENST00000264864.8
EIF4G3	7.55031	1.78079	0.297348	5.9889	2.11266e-09	7.81057e-08	TRUE	UP	ENSG00000075151.24		EP300-201	2.6264	1.98768	0.512169	3.8809	0.000104071	0.00153568	TRUE	UP	ENST00000263253.9
MAP3K21	2.30491	1.77849	0.540382	3.29117	0.000997717	0.00724058	TRUE	UP	ENSG00000143674.11		RTCA-AS1-206	1.88317	1.98105	0.628573	3.15167	0.00162341	0.0141583	TRUE	UP	ENST00000670421.2
EIF2AK1	2.19202	1.77629	0.546465	3.25051	0.00115196	0.00811912	TRUE	UP	ENSG00000086232.13		PNISR-203	1.8433	1.98068	0.625242	3.16786	0.00153564	0.0135141	TRUE	UP	ENST00000460600.1
CACHD1	2.00405	1.775	0.581312	3.05343	0.00226238	0.0139698	TRUE	UP	ENSG00000158966.16		TMEM131-201	1.53379	1.97803	0.673243	2.93806	0.00330276	0.024283	TRUE	UP	ENST00000186436.10
SMPD4	3.75989	1.77452	0.428539	4.14087	3.45991e-05	0.000456008	TRUE	UP	ENSG00000136699.20		CST3-201	2.3235	1.97125	0.555727	3.54716	0.000389405	0.00457659	TRUE	UP	ENST00000376925.8
MED24	3.13442	1.77257	0.455848	3.88851	0.000100863	0.00109185	TRUE	UP	ENSG00000008838.21		NEIL3-201	2.17189	1.9696	0.559733	3.51882	0.000433463	0.00498778	TRUE	UP	ENST00000264596.4
KDM6A	2.32256	1.77099	0.546141	3.24273	0.00118392	0.00829027	TRUE	UP	ENSG00000147050.17		B4GALNT2-202	1.3898	1.96697	0.715467	2.74921	0.00597385	0.0375473	TRUE	UP	ENST00000393354.7
ADAT2	1.90707	1.76996	0.585877	3.02105	0.00251901	0.015168	TRUE	UP	ENSG00000189007.16		ARMT1-201	3.16251	1.96521	0.466447	4.21314	2.51844e-05	0.000466777	TRUE	UP	ENST00000367294.4
SP2	1.72834	1.76469	0.631904	2.79266	0.00522773	0.0273617	TRUE	UP	ENSG00000167182.16		DENND6A-201	2.61475	1.96348	0.510788	3.84402	0.000121036	0.00172174	TRUE	UP	ENST00000311128.10
UBE3D	2.10203	1.75951	0.58188	3.02384	0.00249589	0.0151017	TRUE	UP	ENSG00000118420.17		SAMD4B-212	2.09232	1.95618	0.585095	3.34336	0.000827697	0.00826782	TRUE	UP	ENST00000610417.5
GJC1	2.46931	1.75668	0.512367	3.42855	0.000606812	0.00487966	TRUE	UP	ENSG00000182963.11		PRMT5-202	1.57473	1.95565	0.665347	2.93929	0.0032896	0.0242285	TRUE	UP	ENST00000324366.13
FARP2	2.2316	1.75263	0.56482	3.10299	0.00191574	0.0122993	TRUE	UP	ENSG00000006607.14		SCARNA9-201	7.63734	1.95482	0.307553	6.35604	2.07018e-10	1.22908e-08	TRUE	UP	ENST00000530422.1
CIZ1	3.13586	1.75162	0.46082	3.8011	0.000144055	0.00147888	TRUE	UP	ENSG00000148337.22		WDR45B-201	2.06417	1.95432	0.586485	3.33226	0.000861427	0.00855071	TRUE	UP	ENST00000392325.9
FBXL20	1.81417	1.75068	0.59587	2.93803	0.00330309	0.0189996	TRUE	UP	ENSG00000108306.13		CASP8AP2-201	1.94422	1.94963	0.596716	3.26727	0.00108589	0.0102098	TRUE	UP	ENST00000237177.10
ATE1	1.53054	1.74849	0.67443	2.59254	0.0095271	0.0432712	TRUE	UP	ENSG00000107669.19		FMR1-201	1.58446	1.94704	0.664812	2.9287	0.00340378	0.0247829	TRUE	UP	ENST00000218200.12
RPL39P3	1.63169	1.74817	0.636717	2.74561	0.0060399	0.0306361	TRUE	UP	ENSG00000235174.1		PLS3-202	28.9132	1.94035	0.156197	12.4225	1.97326e-35	1.24769e-32	TRUE	UP	ENST00000355899.8
TMEM181	3.78024	1.74576	0.418307	4.1734	3.00086e-05	0.000413626	TRUE	UP	ENSG00000146433.10		MPI-202	1.28598	1.93734	0.725667	2.66974	0.00759093	0.0451771	TRUE	UP	ENST00000352410.9
CNN3	2.61106	1.74157	0.494534	3.52164	0.000428885	0.00367947	TRUE	UP	ENSG00000117519.16		PLEKHJ1-201	1.33753	1.93429	0.719161	2.68965	0.00715262	0.0431383	TRUE	UP	ENST00000326631.7
RCN2	9.98722	1.74035	0.254631	6.83479	8.21229e-12	4.36904e-10	TRUE	UP	ENSG00000117906.14		UNG-201	2.90342	1.93294	0.599297	3.22534	0.00125824	0.0115753	TRUE	UP	ENST00000242576.7
IFT74	1.90159	1.73927	0.612935	2.83762	0.00454519	0.0244644	TRUE	UP	ENSG00000096872.17		CFAP20-201	1.31658	1.93008	0.72736	2.65354	0.00796516	0.0468499	TRUE	UP	ENST00000262498.8
ODF2	1.7211	1.73883	0.636819	2.73049	0.00632408	0.0316749	TRUE	UP	ENSG00000136811.17		ENST00000688828	2.02519	1.92697	0.599423	3.21471	0.00130578	0.0118886	TRUE	UP	ENST00000688828.2
ATG4C	2.50697	1.73109	0.517185	3.34715	0.000816484	0.0061883	TRUE	UP	ENSG00000125703.15		DBF4B-207	1.34035	1.92378	0.730497	2.63352	0.00845051	0.0488753	TRUE	UP	ENST00000528353.5
PAXBP1	1.97994	1.72894	0.567306	3.04763	0.0023065	0.014172	TRUE	UP	ENSG00000159086.15		PKN3-201	1.64414	1.92162	0.638096	3.01149	0.0025997	0.0202812	TRUE	UP	ENST00000291906.5
SCAF8	2.67867	1.72516	0.495755	3.47986	0.000501679	0.00420072	TRUE	UP	ENSG00000213079.10		POLR2B-202	1.33946	1.91257	0.717909	2.66408	0.00771983	0.0457045	TRUE	UP	ENST00000381227.5
CST3	2.4874	1.7231	0.51534	3.34361	0.000826946	0.00624144	TRUE	UP	ENSG00000101439.9		CNN3-201	1.88482	1.9117	0.602514	3.17288	0.00150936	0.0133291	TRUE	UP	ENST00000370206.9
DYNC2LI1	1.46748	1.72278	0.669364	2.57376	0.0100599	0.0450579	TRUE	UP	ENSG00000138036.18		NT5C3B-216	2.14818	1.90912	0.562454	3.39427	0.000688124	0.00714451	TRUE	UP	ENST00000523903.5
MGRN1	2.32366	1.71771	0.521244	3.2954	0.000982802	0.00717569	TRUE	UP	ENSG00000102858.13		POLR2D-201	3.49462	1.90901	0.447907	4.26207	2.02545e-05	0.000389229	TRUE	UP	ENST00000272645.9
BAZ2A	1.60641	1.71715	0.641108	2.67841	0.00739718	0.0355987	TRUE	UP	ENSG00000076108.12		NFIA-215	4.10382	1.90363	0.419981	4.53266	5.82453e-06	0.000132477	TRUE	UP	ENST00000603233.2
POGLUT1	2.64096	1.71534	0.520259	3.29709	0.000976909	0.00714462	TRUE	UP	ENSG00000163389.12		GTPBP3-201	2.09005	1.90222	0.564868	3.36754	0.000758415	0.00774086	TRUE	UP	ENST00000324894.13
USP46	1.54974	1.71351	0.655595	2.61366	0.00895769	0.0412214	TRUE	UP	ENSG00000109189.13		THAP11-201	1.42535	1.902	0.692409	2.74693	0.00601553	0.0377531	TRUE	UP	ENST00000303596.3
STEEP1	1.47885	1.71155	0.676343	2.5306	0.0113868	0.0493539	TRUE	UP	ENSG00000018610.15		NAA30-204	1.90366	1.89998	0.59503	3.19309	0.00140759	0.0126243	TRUE	UP	ENST00000556492.6
KANSL3	2.60484	1.70763	0.498669	3.42438	0.000616205	0.00494608	TRUE	UP	ENSG00000114982.19		FSTL1-201	2.74069	1.89488	0.513784	3.68809	0.000225941	0.00291556	TRUE	UP	ENST00000295633.8
RAB5B	2.45545	1.70226	0.528425	3.22139	0.00127572	0.00884787	TRUE	UP	ENSG00000111540.16		PABPN1-202	2.94152	1.89463	0.478156	3.96237	7.42107e-05	0.00116291	TRUE	UP	ENST00000397276.6
SLC17A5	1.65007	1.69953	0.660194	2.57428	0.0100448	0.0450132	TRUE	UP	ENSG00000119899.13		CSK-201	2.20255	1.89187	0.562144	3.36546	0.000764173	0.00776204	TRUE	UP	ENST00000220003.14
CHN1	1.56998	1.69827	0.642652	2.6426	0.00822725	0.038407	TRUE	UP	ENSG00000128656.15		RTL8A-201	3.65601	1.88673	0.593386	3.1796	0.00147476	0.0130693	TRUE	UP	ENST00000370775.3
UFL1	3.23848	1.69778	0.440508	3.85414	0.000116135	0.00122821	TRUE	UP	ENSG00000014123.10		ENST00000598952	1.9342	1.88577	0.596609	3.16081	0.00157331	0.0137725	TRUE	UP	ENST00000598952.1
BCOR	6.51953	1.69721	0.316381	5.36446	8.11935e-08	2.28122e-06	TRUE	UP	ENSG00000183337.18		ARL6IP6-201	2.63749	1.87246	0.512554	3.6532	0.000258995	0.00328181	TRUE	UP	ENST00000326446.10
ADPGK	1.5143	1.69446	0.649939	2.6071	0.00913125	0.0418436	TRUE	UP	ENSG00000159322.18		BSDC1-206	2.6941	1.87121	0.527203	3.54931	0.000386246	0.00455706	TRUE	UP	ENST00000455895.7
PLA2G12A	1.51024	1.68967	0.661477	2.55439	0.0106375	0.0468275	TRUE	UP	ENSG00000123739.11		HMGB2-201	16.2663	1.87016	0.204606	9.14027	6.22959e-20	1.23093e-17	TRUE	UP	ENST00000296503.10
CDT1	2.13776	1.68775	0.571793	2.95167	0.00316058	0.0182986	TRUE	UP	ENSG00000167513.9		NRDE2-201	1.7483	1.86988	0.637327	2.93395	0.00334683	0.0244931	TRUE	UP	ENST00000354366.8
SCAMP2	3.46612	1.68725	0.42619	3.95893	7.52868e-05	0.000870036	TRUE	UP	ENSG00000140497.16		UBR3-201	1.4798	1.86502	0.685792	2.71952	0.00653767	0.0401142	TRUE	UP	ENST00000272793.11
KDM4B	1.88509	1.68198	0.579965	2.90013	0.00373002	0.0208886	TRUE	UP	ENSG00000127663.15		AKAP12-204	1.70122	1.86426	0.644592	2.89215	0.00382612	0.0269405	TRUE	UP	ENST00000402676.7
CRYZL1	2.1943	1.68094	0.546233	3.07733	0.00208867	0.01312	TRUE	UP	ENSG00000205758.12		MAP3K21-203	1.46767	1.86423	0.681885	2.73393	0.00625831	0.0389098	TRUE	UP	ENST00000366624.8
TMEM242	3.39999	1.67724	0.452112	3.70979	0.000207431	0.00202896	TRUE	UP	ENSG00000215712.11		SNAI2-201	2.99635	1.86249	0.463505	4.01826	5.86296e-05	0.000942096	TRUE	UP	ENST00000020945.4
PPP1R7	3.10972	1.67624	0.447354	3.74702	0.000178951	0.00177224	TRUE	UP	ENSG00000115685.15		LEMD3-201	2.42832	1.85888	0.522765	3.55585	0.000376754	0.00446526	TRUE	UP	ENST00000308330.3
MBD1	1.48459	1.67587	0.659924	2.53949	0.0111015	0.0484303	TRUE	UP	ENSG00000141644.19		FGF13-202	1.52413	1.85728	0.686749	2.70445	0.00684178	0.0416368	TRUE	UP	ENST00000315930.11
C2CD5	1.95141	1.673	0.572663	2.92144	0.00348419	0.0198154	TRUE	UP	ENSG00000111731.13		PCGF3-201	1.51887	1.85689	0.672728	2.76024	0.00577582	0.036612	TRUE	UP	ENST00000362003.10
FN1	2.00168	1.67274	0.574662	2.91082	0.00360487	0.0203576	TRUE	UP	ENSG00000115414.21		RCN2-203	9.20963	1.85572	0.269541	6.88475	5.789e-12	4.49127e-10	TRUE	UP	ENST00000394885.8
SLC18B1	2.45455	1.67154	0.506476	3.30034	0.000965666	0.00708101	TRUE	UP	ENSG00000146409.12		ZNF37BP-202	1.69778	1.85567	0.632426	2.93421	0.00334402	0.0244867	TRUE	UP	ENST00000452075.7
CSK	2.67025	1.66998	0.499912	3.34055	0.000836128	0.00629441	TRUE	UP	ENSG00000103653.17		TMX4-201	1.42681	1.85218	0.695177	2.66433	0.00771418	0.0456925	TRUE	UP	ENST00000246024.7
CBR4	2.33249	1.66811	0.525171	3.17633	0.00149152	0.0100181	TRUE	UP	ENSG00000145439.12		SFT2D1-201	10.5903	1.85077	0.252396	7.33282	2.25353e-13	2.12329e-11	TRUE	UP	ENST00000361731.4
MTR	7.21141	1.66553	0.297733	5.59405	2.21828e-08	6.72032e-07	TRUE	UP	ENSG00000116984.15		DCP1A-206	2.18521	1.85042	0.544973	3.39544	0.000685194	0.00713166	TRUE	UP	ENST00000610213.6
RAD51AP1	2.78268	1.66513	0.479286	3.47419	0.000512392	0.00426586	TRUE	UP	ENSG00000111247.15		C1orf109-207	1.45666	1.84831	0.687326	2.68913	0.00716378	0.0431807	TRUE	UP	ENST00000486637.2
STK25	2.57497	1.66171	0.504043	3.29677	0.000978045	0.00714694	TRUE	UP	ENSG00000115694.15		UFL1-201	3.19462	1.84687	0.452412	4.08226	4.4599e-05	0.000750998	TRUE	UP	ENST00000369278.5
TMEM131	1.70362	1.6617	0.612425	2.71331	0.00666156	0.0328931	TRUE	UP	ENSG00000075568.17		YTHDF2-209	1.89557	1.84468	0.596773	3.09109	0.00199426	0.0164296	TRUE	UP	ENST00000542507.5
CLASP2	3.2497	1.65963	0.454369	3.65259	0.000259606	0.0024408	TRUE	UP	ENSG00000163539.18		U2AF1-202	1.93842	1.8435	0.606906	3.03753	0.00238525	0.018971	TRUE	UP	ENST00000380276.6
IER5	2.7025	1.65852	0.510036	3.25176	0.00114692	0.00809615	TRUE	UP	ENSG00000162783.11		KLHDC2-201	2.11673	1.842	0.581795	3.16607	0.00154511	0.013588	TRUE	UP	ENST00000298307.10
SENP5	1.68743	1.65744	0.625978	2.64777	0.00810257	0.0379987	TRUE	UP	ENSG00000119231.11		SLC18B1-201	1.96543	1.84136	0.574954	3.20261	0.00136188	0.0123016	TRUE	UP	ENST00000275227.9
[truncated: 4,944 more rows]

## Sheet: PromethION_2R_DEG_DET_HEK_HeLa
Differentially expressed genes (left) and transcripts (right) in HEK293 vs HeLa, per each time point (PromethION). Data was collected 1-hour, 2-hours, 5hours, 10-hours and 24-hours post-sequencing initiation. The same time points for DEGs and DETs are shown in the same row.
Differential Gene expression											Differential Transcript expression
1 hour post-sequencing initiation											1 hour post-sequencing initiation
gene name	gene base mean	log 2 fold change	lfcSE	stat	p-value	p-adjusted	significance	significance_reg	gene ID		transcript name	transcript base mean	log 2 fold change	lfcSE	stat	p-value	p-adjusted	significance	significance_reg	gene ID
RNA5-8SN4	90.2376	2.89941	0.419049	6.91902	4.54782e-12	1.80685e-08	TRUE	UP	ENSG00000276700.1		ENST00000702449	8349.31	1.66607	0.129587	12.8567	7.88601e-38	6.18658e-34	TRUE	UP	ENST00000702449.1
5_8S_rRNA	50.5598	2.86783	0.536803	5.34243	9.17093e-08	7.28722e-05	TRUE	UP	ENSG00000275757.1		ENST00000638356	8646.41	1.65446	0.146905	11.2621	2.01968e-29	7.9222e-26	TRUE	UP	ENST00000638356.1
RNA5-8SN1	31.5189	2.59877	0.644353	4.03315	5.50347e-05	0.0273316	TRUE	UP	ENSG00000278189.1		MT-RNR2-201	715.281	0.8676	0.164693	5.268	1.37919e-07	0.000180329	TRUE	UP	ENST00000387347.2
MT-RNR2	699.291	1.1223	0.165867	6.76625	1.32166e-11	2.62548e-08	TRUE	UP	ENSG00000210082.2		ENST00000445125	3051.22	-0.855143	0.13438	-6.36362	1.97053e-10	3.8647e-07	TRUE	DOWN	ENST00000445125.2
MT-RNR1	343.552	0.904915	0.223551	4.04792	5.16754e-05	0.0273316	TRUE	UP	ENSG00000211459.2		ENST00000631211	457.038	-0.959287	0.211493	-4.53579	5.7389e-06	0.00500241	TRUE	DOWN	ENST00000631211.1
ENSG00000281181	239.913	-1.48016	0.252514	-5.86168	4.58201e-09	6.06811e-06	TRUE	DOWN	ENSG00000281181.1		ENST00000625598	474.12	-0.976301	0.206706	-4.72315	2.32224e-06	0.00227725	TRUE	DOWN	ENST00000625598.1
ACTB	36.9805	-2.90614	0.660836	-4.39767	1.0942e-05	0.0072454	TRUE	DOWN	ENSG00000075624.17		ENST00000627981	455.593	-1.01426	0.204204	-4.96691	6.80266e-07	0.000762383	TRUE	DOWN	ENST00000627981.1
ENSG00000281383	48.4794	-3.47173	0.624287	-5.56112	2.6805e-08	2.6624e-05	TRUE	DOWN	ENSG00000281383.1		ENST00000629969	89.101	-3.33338	0.450996	-7.39116	1.45548e-13	3.80609e-10	TRUE	DOWN	ENST00000629969.1
											FTH1-201	39.7616	-4.09044	0.762008	-5.36798	7.96238e-08	0.00012493	TRUE	DOWN	ENST00000273550.12
2 hour post-sequencing initiation											2 hour post-sequencing initiation
gene name	gene base mean	log 2 fold change	lfcSE	stat	p-value	p-adjusted	significance	significance_reg	gene ID		transcript name	transcript base mean	log 2 fold change	lfcSE	stat	p-value	p-adjusted	significance	significance_reg	gene ID
RNA5-8SN4	155	3.15376	0.331195	9.52237	1.69266e-21	8.43962e-18	TRUE	UP	ENSG00000276700.1		RNA5-8SN3-201	49.1391	1.87696	0.507795	3.69629	0.000218772	0.0478441	TRUE	UP	ENST00000613359.1
5_8S_rRNA	75.5883	2.97046	0.443036	6.70479	2.01698e-11	2.51416e-08	TRUE	UP	ENSG00000275757.1		ENST00000702449	13935.2	1.74138	0.102348	17.0143	6.43738e-65	1.85461e-61	TRUE	UP	ENST00000702449.1
RNA5-8SN1	49.4639	2.82121	0.526769	5.35568	8.52352e-08	6.07118e-05	TRUE	UP	ENSG00000278189.1		ENST00000638356	14348.7	1.70629	0.105053	16.2422	2.53747e-59	3.65522e-56	TRUE	UP	ENST00000638356.1
RNA5-8SN5	35.8287	2.43975	0.600005	4.06622	4.77814e-05	0.0238238	TRUE	UP	ENSG00000274917.1		MT-RNR2-201	1062.01	0.935684	0.136523	6.85367	7.19792e-12	5.18431e-09	TRUE	UP	ENST00000387347.2
MT-RNR2	1028.62	1.14241	0.152472	7.49259	6.75265e-14	1.68343e-10	TRUE	UP	ENSG00000210082.2		MT-RNR1-201	529.045	0.699915	0.175413	3.9901	6.60445e-05	0.0190274	TRUE	UP	ENST00000389680.2
MT-RNR1	519.736	0.891884	0.190601	4.67933	2.87811e-06	0.00179378	TRUE	UP	ENSG00000211459.2		ENST00000445125	4559.02	-0.79006	0.128429	-6.15172	7.66475e-10	3.68036e-07	TRUE	DOWN	ENST00000445125.2
ENSG00000281181	359.077	-1.42394	0.220766	-6.45	1.11849e-10	1.11535e-07	TRUE	DOWN	ENSG00000281181.1		ENST00000625598	706.097	-0.867871	0.202793	-4.2796	1.87229e-05	0.00599341	TRUE	DOWN	ENST00000625598.1
ACTB	56.4149	-2.96806	0.543827	-5.45773	4.82263e-08	4.0076e-05	TRUE	DOWN	ENSG00000075624.17		ENST00000631211	699.25	-0.891201	0.194673	-4.57794	4.69573e-06	0.00169105	TRUE	DOWN	ENST00000631211.1
ENSG00000281383	68.6057	-3.64019	0.541343	-6.72436	1.76365e-11	2.51416e-08	TRUE	DOWN	ENSG00000281383.1		ENST00000627981	696.67	-0.937712	0.184577	-5.08032	3.76796e-07	0.000155079	TRUE	DOWN	ENST00000627981.1
S100A6	14.6503	-6.96518	1.67978	-4.14648	3.37623e-05	0.0187043	TRUE	DOWN	ENSG00000197956.10		ENST00000629969	126.055	-3.15612	0.378822	-8.33139	7.98984e-17	7.67291e-14	TRUE	DOWN	ENST00000629969.1
											FTL-201	24.1872	-3.17224	0.844022	-3.75848	0.000170946	0.0410412	TRUE	DOWN	ENST00000331825.11
											FTH1-201	56.5696	-3.73209	0.600476	-6.21522	5.12528e-10	2.95318e-07	TRUE	DOWN	ENST00000273550.12
											GAPDH-211	10.3076	-6.52845	1.77365	-3.68081	0.000232495	0.0478441	TRUE	DOWN	ENST00000619601.1
											S100A6-201	10.9214	-6.61172	1.75793	-3.76109	0.000169176	0.0410412	TRUE	DOWN	ENST00000368719.9
5 hour post-sequencing initiation											5 hour post-sequencing initiation
gene name	gene base mean	log 2 fold change	lfcSE	stat	p-value	p-adjusted	significance	significance_reg	gene ID		transcript name	transcript base mean	log 2 fold change	lfcSE	stat	p-value	p-adjusted	significance	significance_reg	gene ID
RNA5-8SN1	193.28	3.23595	0.284686	11.3667	6.12415e-30	5.30505e-27	TRUE	UP	ENSG00000278189.1		ENST00000702449	48211.5	1.61995	0.348721	4.6454	3.39426e-06	0.0173557	TRUE	UP	ENST00000702449.1
RNA5-8SN4	652.919	3.11285	0.18309	17.0018	7.96865e-65	2.76114e-61	TRUE	UP	ENSG00000276700.1		ENST00000629969	339.681	-3.43092	0.428629	-8.00441	1.20044e-15	1.22763e-11	TRUE	DOWN	ENST00000629969.1
RNA5-8SN5	140.211	2.907	0.321431	9.04391	1.51163e-19	8.72965e-17	TRUE	UP	ENSG00000274917.1		FTL-201	59.1718	-3.54525	0.642127	-5.5211	3.36893e-08	0.000229683	TRUE	DOWN	ENST00000331825.11
5_8S_rRNA	278.148	2.70683	0.236553	11.4428	2.55532e-30	4.4271e-27	TRUE	UP	ENSG00000275757.1		FTH1-201	156.388	-4.21043	0.501383	-8.39765	4.55514e-17	9.31662e-13	TRUE	DOWN	ENST00000273550.12
RPS4X	69.7552	1.71619	0.409715	4.18875	2.80497e-05	0.00511537	TRUE	UP	ENSG00000198034.11		GAPDH-211	28.0942	-5.36049	1.2206	-4.39167	1.12484e-05	0.0460127	TRUE	DOWN	ENST00000619601.1
RPL36	67.7771	1.68687	0.449413	3.75349	0.000174391	0.0215809	TRUE	UP	ENSG00000130255.13
MT-RNR2	3314.25	1.40443	0.123392	11.3818	5.14961e-30	5.30505e-27	TRUE	UP	ENSG00000210082.2
RPS15	92.1918	1.24485	0.356082	3.49597	0.000472337	0.0495954	TRUE	UP	ENSG00000115268.10
MT-RNR1	1704.9	1.1698	0.138482	8.44735	2.97998e-17	1.2907e-14	TRUE	UP	ENSG00000211459.2
RPS2	186.273	0.984136	0.261453	3.76411	0.000167144	0.0214502	TRUE	UP	ENSG00000140988.16
ENSG00000281181	1075.9	-1.15556	0.164382	-7.0297	2.06971e-12	7.9684e-10	TRUE	DOWN	ENSG00000281181.1
RPL37	124.365	-1.32155	0.325928	-4.05472	5.0195e-05	0.00756199	TRUE	DOWN	ENSG00000145592.14
ACTG1	97.7163	-1.69337	0.373348	-4.53564	5.74291e-06	0.00153071	TRUE	DOWN	ENSG00000184009.13
PKM	52.4479	-2.19805	0.509744	-4.31208	1.61729e-05	0.00311329	TRUE	DOWN	ENSG00000067225.21
ACTB	167.572	-2.68576	0.313454	-8.56828	1.05044e-17	5.19966e-15	TRUE	DOWN	ENSG00000075624.17
FLNA	25.4587	-2.892	0.778787	-3.71347	0.00020444	0.0244271	TRUE	DOWN	ENSG00000196924.19
ENSG00000281383	199.619	-2.99873	0.30261	-9.90956	3.78321e-23	2.62177e-20	TRUE	DOWN	ENSG00000281383.1
FTL	58.4299	-3.12582	0.539461	-5.79433	6.85942e-09	2.37679e-06	TRUE	DOWN	ENSG00000087086.15
ANXA2	31.7071	-3.25645	0.73325	-4.44112	8.94931e-06	0.0020023	TRUE	DOWN	ENSG00000182718.18
CLU	24.2364	-3.73791	0.906948	-4.12141	3.76557e-05	0.0062132	TRUE	DOWN	ENSG00000120885.22
TKT	20.7899	-4.28472	1.07712	-3.97795	6.95133e-05	0.010036	TRUE	DOWN	ENSG00000163931.17
SLC7A5	16.3594	-4.54293	1.27085	-3.5747	0.000350629	0.0379666	TRUE	DOWN	ENSG00000103257.9
TPM2	18.8025	-5.78446	1.59497	-3.62669	0.000287077	0.0331573	TRUE	DOWN	ENSG00000198467.16
TMSB4X	23.5985	-6.1159	1.56295	-3.91306	9.11351e-05	0.0121455	TRUE	DOWN	ENSG00000205542.11
KRT8	24.4426	-6.15879	1.5582	-3.95252	7.73334e-05	0.0107184	TRUE	DOWN	ENSG00000170421.13
KRT18	9.70753	-6.2927	1.75891	-3.57761	0.000346744	0.0379666	TRUE	DOWN	ENSG00000111057.11
PFN1	13.754	-6.79469	1.67515	-4.05617	4.98836e-05	0.00756199	TRUE	DOWN	ENSG00000108518.8
TGFBI	14.8445	-6.90599	1.65588	-4.17059	3.03812e-05	0.00526354	TRUE	DOWN	ENSG00000120708.17
S100A6	45.5824	-7.06886	1.50136	-4.70829	2.498e-06	0.00078687	TRUE	DOWN	ENSG00000197956.10
AKR1C2	17.8429	-7.17061	1.62413	-4.41505	1.00987e-05	0.00205834	TRUE	DOWN	ENSG00000151632.18
SPINK6	18.0193	-7.18587	1.62059	-4.4341	9.24584e-06	0.0020023	TRUE	DOWN	ENSG00000178172.7
LGALS1	18.1109	-7.19264	1.62017	-4.43943	9.01957e-06	0.0020023	TRUE	DOWN	ENSG00000100097.12
BASP1	20.3411	-7.3607	1.60155	-4.596	4.30675e-06	0.00124357	TRUE	DOWN	ENSG00000176788.9
10 hour post-sequencing initiation											10 hour post-sequencing initiation
gene name	gene base mean	log 2 fold change	lfcSE	stat	p-value	p-adjusted	significance	significance_reg	gene ID		transcript name	transcript base mean	log 2 fold change	lfcSE	stat	p-value	p-adjusted	significance	significance_reg	gene ID
RNA5-8SN1	351.701	3.47225	0.226691	15.3171	5.8806e-53	9.23842e-50	TRUE	UP	ENSG00000278189.1		RPL23A-204	97.9979	1.81464	0.368184	4.92863	8.28079e-07	0.00152787	TRUE	UP	ENST00000422514.7
RNA5-8SN4	1178.74	3.20291	0.160701	19.9308	2.19944e-88	6.91063e-85	TRUE	UP	ENSG00000276700.1		RPL36-201	79.318	1.80769	0.401006	4.50788	6.5478e-06	0.00768801	TRUE	UP	ENST00000347512.8
RNA5-8SN5	235.73	3.10127	0.25706	12.0643	1.62944e-33	1.02394e-30	TRUE	UP	ENSG00000274917.1		RPS15-209	133.303	1.4316	0.319635	4.47885	7.50462e-06	0.00789913	TRUE	UP	ENST00000592588.7
5_8S_rRNA	467.365	2.87353	0.197874	14.522	8.79065e-48	9.20674e-45	TRUE	UP	ENSG00000275757.1		RNA5-8SN3-201	209.821	1.38065	0.270271	5.10838	3.24938e-07	0.000645652	TRUE	UP	ENST00000613359.1
MT-ND3	39.2944	2.28673	0.594479	3.84662	0.000119758	0.00940698	TRUE	UP	ENSG00000198840.2		RNA5-8SN2-201	219.643	1.24409	0.269072	4.62361	3.77121e-06	0.0048707	TRUE	UP	ENST00000612463.1
RPL36AP37	64.7191	1.80817	0.423131	4.27332	1.92583e-05	0.00195192	TRUE	UP	ENSG00000244398.1		RPS2-201	230.913	1.21466	0.256964	4.72696	2.27905e-06	0.00333339	TRUE	UP	ENST00000343262.9
RPS4X	108.625	1.78155	0.334555	5.32515	1.00869e-07	2.88119e-05	TRUE	UP	ENSG00000198034.11		5_8S_rRNA.5-201	203.566	1.18782	0.281363	4.22165	2.4252e-05	0.0212966	TRUE	UP	ENST00000610460.1
RPL36	104.313	1.76375	0.34931	5.04923	4.43598e-07	9.9556e-05	TRUE	UP	ENSG00000130255.13		RNA5-8SN1-201	196.249	1.10575	0.271865	4.06727	4.75671e-05	0.0347306	TRUE	UP	ENST00000619471.1
MT-RNR2	5180.97	1.53421	0.121751	12.6012	2.07954e-36	1.63348e-33	TRUE	UP	ENSG00000210082.2		ENST00000702449	58933.5	1.03371	0.156006	6.62612	3.44615e-11	9.89085e-08	TRUE	UP	ENST00000702449.1
5_8S_rRNA.1	79.9631	1.45741	0.385006	3.78543	0.000153441	0.0114789	TRUE	UP	ENSG00000273730.1		ENST00000638356	60719.7	1.0323	0.155297	6.64729	2.98532e-11	9.63921e-08	TRUE	UP	ENST00000638356.1
RPS15	137.097	1.30369	0.299139	4.35814	1.31172e-05	0.00142119	TRUE	UP	ENSG00000115268.10		MT-ND4-201	220.942	-1.13067	0.278693	-4.05706	4.9695e-05	0.0347306	TRUE	DOWN	ENST00000361381.2
MT-RNR1	2636.07	1.26121	0.133286	9.46249	3.00709e-21	1.18104e-18	TRUE	UP	ENSG00000211459.2		MT-ND1-201	230.378	-1.16662	0.267128	-4.36726	1.25814e-05	0.0124996	TRUE	DOWN	ENST00000361390.2
RPL18	95.1332	1.18571	0.352288	3.36573	0.000763412	0.0479728	TRUE	UP	ENSG00000063177.13		RPL37-201	176.431	-1.40864	0.295012	-4.77486	1.7983e-06	0.0030968	TRUE	DOWN	ENST00000274242.10
MT-CYB	211.812	1.12001	0.252452	4.43653	9.14201e-06	0.00102586	TRUE	UP	ENSG00000198727.2		ENST00000631211	2542.86	-1.79545	0.234072	-7.67051	1.7131e-14	1.10628e-10	TRUE	DOWN	ENST00000631211.1
RPS19	131.148	1.03576	0.30264	3.4224	0.000620698	0.0414943	TRUE	UP	ENSG00000105372.8		ENST00000625598	2532.65	-1.85479	0.245136	-7.56635	3.83852e-14	1.98306e-10	TRUE	DOWN	ENST00000625598.1
RPS2	283.824	0.999318	0.221064	4.52049	6.16964e-06	0.000775401	TRUE	UP	ENSG00000140988.16		ENST00000627981	2542.21	-1.88877	0.26897	-7.02222	2.18372e-12	8.05823e-09	TRUE	DOWN	ENST00000627981.1
MT-CO2	467.578	0.68798	0.202765	3.393	0.000691326	0.0443295	TRUE	UP	ENSG00000198712.1		MT-ND2-201	169.103	-1.92317	0.318512	-6.038	1.56036e-09	4.03056e-06	TRUE	DOWN	ENST00000361453.3
ENSG00000281181	1641.01	-1.08468	0.157429	-6.88998	5.57991e-12	1.94801e-09	TRUE	DOWN	ENSG00000281181.1		MT-ATP6-201	147.53	-1.96295	0.342008	-5.73948	9.49669e-09	2.23008e-05	TRUE	DOWN	ENST00000361899.2
MT-ND4	109.191	-1.15055	0.337952	-3.40448	0.000662906	0.0433927	TRUE	DOWN	ENSG00000198886.2		ENST00000445125	15132.9	-2.1256	0.157827	-13.4679	2.41524e-41	3.1194e-37	TRUE	DOWN	ENST00000445125.2
RPL37	183.225	-1.2214	0.274782	-4.44497	8.79036e-06	0.00102294	TRUE	DOWN	ENSG00000145592.14		ACTB-213	27.5098	-3.20816	0.787095	-4.07596	4.58258e-05	0.0347306	TRUE	DOWN	ENST00000642480.2
ACTG1	152.135	-1.4215	0.303903	-4.67747	2.9044e-06	0.000396767	TRUE	DOWN	ENSG00000184009.13		ACTB-208	24.2288	-3.47379	0.874808	-3.97092	7.15952e-05	0.0451067	TRUE	DOWN	ENST00000473257.3
PKM	84.3109	-2.06343	0.401651	-5.13738	2.78593e-07	6.73337e-05	TRUE	DOWN	ENSG00000067225.21		FTL-201	85.821	-3.64757	0.493218	-7.39545	1.40926e-13	6.06711e-10	TRUE	DOWN	ENST00000331825.11
FLNA	37.565	-2.43305	0.612474	-3.9725	7.11236e-05	0.00603974	TRUE	DOWN	ENSG00000196924.19		ACTB-219	28.6627	-4.01158	0.880625	-4.55538	5.22911e-06	0.00643206	TRUE	DOWN	ENST00000674681.1
ID3	31.0491	-2.5531	0.675556	-3.77926	0.000157298	0.0114937	TRUE	DOWN	ENSG00000117318.9		FTH1-201	222.792	-4.21429	0.352562	-11.9533	6.23813e-33	5.37124e-29	TRUE	DOWN	ENST00000273550.12
ENSG00000281383	287.858	-2.63929	0.253353	-10.4174	2.06462e-25	1.08117e-22	TRUE	DOWN	ENSG00000281383.1		ENST00000629969	486.74	-4.22138	0.261988	-16.1129	2.07183e-58	5.35176e-54	TRUE	DOWN	ENST00000629969.1
ACTB	245.837	-2.64542	0.266979	-9.90873	3.81468e-23	1.71224e-20	TRUE	DOWN	ENSG00000075624.17		KRT18-201	21.017	-4.33544	1.10143	-3.93618	8.27875e-05	0.0497322	TRUE	DOWN	ENST00000388835.4
ANXA2	50.7119	-2.66268	0.540643	-4.92504	8.43443e-07	0.000155888	TRUE	DOWN	ENSG00000182718.18		TKT-207	23.5035	-4.47422	1.06206	-4.21277	2.52259e-05	0.0212966	TRUE	DOWN	ENST00000462138.6
FTL	83.5353	-3.05974	0.453515	-6.74671	1.51234e-11	4.75176e-09	TRUE	DOWN	ENSG00000087086.15		GAPDH-211	41.2804	-4.56472	0.818033	-5.58012	2.4035e-08	5.17373e-05	TRUE	DOWN	ENST00000619601.1
LMNA	24.9131	-3.21758	0.820128	-3.92327	8.73551e-05	0.00722289	TRUE	DOWN	ENSG00000160789.24		FTH1-212	26.3566	-4.64819	1.03774	-4.47916	7.49359e-06	0.00789913	TRUE	DOWN	ENST00000620041.4
HSPB1	22.7063	-3.92933	0.96677	-4.06439	4.81589e-05	0.00458531	TRUE	DOWN	ENSG00000106211.10		AKR1C2-201	20.5959	-4.90844	1.24636	-3.93822	8.20871e-05	0.0497322	TRUE	DOWN	ENST00000380753.9
CLU	34.6727	-3.96044	0.790681	-5.00889	5.47442e-07	0.000107504	TRUE	DOWN	ENSG00000120885.22		TMSB4X-204	21.9986	-5.00595	1.23396	-4.05681	4.97477e-05	0.0347306	TRUE	DOWN	ENST00000451311.7
TKT	31.3633	-4.08988	0.848168	-4.82202	1.42115e-06	0.00021263	TRUE	DOWN	ENSG00000163931.17		KRT7-201	22.3941	-5.01686	1.21998	-4.11226	3.91796e-05	0.0316265	TRUE	DOWN	ENST00000331817.6
PFN1	21.0754	-4.86146	1.22206	-3.97807	6.94774e-05	0.00603974	TRUE	DOWN	ENSG00000108518.8		SPINK6-201	13.2713	-6.74755	1.69174	-3.98852	6.64858e-05	0.0429349	TRUE	DOWN	ENST00000325630.3
TMSB4X	31.9569	-4.91023	1.00582	-4.88181	1.05114e-06	0.000173826	TRUE	DOWN	ENSG00000205542.11		ACTB-222	13.3939	-6.75989	1.69094	-3.99771	6.39576e-05	0.0423612	TRUE	DOWN	ENST00000676319.1
SLC7A5	22.5783	-4.97947	1.21118	-4.11126	3.93512e-05	0.0038638	TRUE	DOWN	ENSG00000103257.9		BASP1-203	13.5437	-6.77616	1.68744	-4.01564	5.9284e-05	0.0402991	TRUE	DOWN	ENST00000616743.1
TPM2	27.082	-5.25118	1.17885	-4.45451	8.40842e-06	0.00101612	TRUE	DOWN	ENSG00000198467.16		FTH1-210	14.388	-6.86259	1.68042	-4.08385	4.42961e-05	0.0346731	TRUE	DOWN	ENST00000534180.1
S100A4	23.6535	-6.06608	1.55853	-3.89218	9.93455e-05	0.00800368	TRUE	DOWN	ENSG00000196154.12		BEST1-202	15.5865	-6.97964	1.65794	-4.20981	2.55583e-05	0.0212966	TRUE	DOWN	ENST00000449131.6
CAVIN1	8.9805	-6.1353	1.7859	-3.43542	0.000591632	0.040411	TRUE	DOWN	ENSG00000177469.13		KRT8-216	16.9143	-7.0961	1.64717	-4.30806	1.64691e-05	0.0151933	TRUE	DOWN	ENST00000552551.5
AKR1C3	9.42727	-6.20619	1.76372	-3.51881	0.000433484	0.0302668	TRUE	DOWN	ENSG00000196139.14		BASP1-201	17.0096	-7.10575	1.6416	-4.32855	1.50098e-05	0.0143599	TRUE	DOWN	ENST00000322611.4
COL5A1	10.952	-6.42454	1.72555	-3.72319	0.000196721	0.0140476	TRUE	DOWN	ENSG00000130635.17		S100A6-201	47.8892	-7.14414	1.50091	-4.75987	1.93718e-06	0.00312746	TRUE	DOWN	ENST00000368719.9
MYL9	11.548	-6.50025	1.70797	-3.80584	0.000141324	0.0108302	TRUE	DOWN	ENSG00000101335.10		S100A6-205	18.9366	-7.25985	1.62235	-4.47489	7.64501e-06	0.00789913	TRUE	DOWN	ENST00000496817.5
KRT8	33.2439	-6.56448	1.52276	-4.31091	1.62586e-05	0.00170282	TRUE	DOWN	ENSG00000170421.13		KRT17-201	22.1847	-7.48823	1.59804	-4.68588	2.78757e-06	0.00378977	TRUE	DOWN	ENST00000311208.13
NQO1	13.3285	-6.70668	1.67438	-4.00546	6.18967e-05	0.00555656	TRUE	DOWN	ENSG00000181019.13		LGALS1-201	22.8043	-7.52842	1.59396	-4.72309	2.32283e-06	0.00333339	TRUE	DOWN	ENST00000215909.10
KRT18	13.7614	-6.75213	1.66896	-4.04572	5.21634e-05	0.00482051	TRUE	DOWN	ENSG00000111057.11
TGFBI	21.0392	-7.36478	1.59478	-4.61804	3.87376e-06	0.00050714	TRUE	DOWN	ENSG00000120708.17
SPINK6	23.8764	-7.54779	1.57723	-4.78549	1.70571e-06	0.000243607	TRUE	DOWN	ENSG00000178172.7
AKR1C2	25.2102	-7.62571	1.57125	-4.85329	1.21433e-06	0.000190771	TRUE	DOWN	ENSG00000151632.18
S100A6	69.47	-7.63761	1.47433	-5.1804	2.21416e-07	5.79742e-05	TRUE	DOWN	ENSG00000197956.10
LGALS1	25.7774	-7.65833	1.56793	-4.88435	1.03771e-06	0.000173826	TRUE	DOWN	ENSG00000100097.12
BASP1	28.5367	-7.80507	1.5566	-5.01416	5.32647e-07	0.000107504	TRUE	DOWN	ENSG00000176788.9
24 hour post-sequencing initiation											24 hour post-sequencing initiation
gene name	gene base mean	log 2 fold change	lfcSE	stat	p-value	p-adjusted	significance	significance_reg	gene ID		transcript name	transcript base mean	log 2 fold change	lfcSE	stat	p-value	p-adjusted	significance	significance_reg	gene ID
HEY1	7.58048	6.9593	1.60361	4.33978	1.42625e-05	0.00185119	TRUE	UP	ENSG00000164683.19		NEFL-201	18.3114	6.65942	1.6033	4.15357	3.27327e-05	0.00557407	TRUE	UP	ENST00000610854.2
TNC	5.73755	6.56058	1.65609	3.96149	7.4482e-05	0.00753896	TRUE	UP	ENSG00000041982.17		UCHL1-201	16.2614	5.5003	1.2994	4.23297	2.30628e-05	0.00428773	TRUE	UP	ENST00000284440.9
CPVL	4.36976	6.16022	1.7016	3.62024	0.000294328	0.0231711	TRUE	UP	ENSG00000106066.15		CA2-201	14.3894	4.68488	1.17882	3.97423	7.06082e-05	0.0102421	TRUE	UP	ENST00000285379.10
DMKN	4.28096	6.14088	1.71086	3.58935	0.000331501	0.0255957	TRUE	UP	ENSG00000161249.21		XIST-204	13.3462	3.82749	1.08817	3.51735	0.000435885	0.04876	TRUE	UP	ENST00000429829.6
DPH5	4.23656	6.13066	1.7227	3.55875	0.000372631	0.0284072	TRUE	UP	ENSG00000117543.22		RNA5-8SN3-201	776.801	2.22492	0.175144	12.7033	5.66539e-37	1.06833e-33	TRUE	UP	ENST00000613359.1
SPTSSA	3.59707	5.88569	1.75333	3.35687	0.000788305	0.0495901	TRUE	UP	ENSG00000165389.7		5_8S_rRNA.5-201	777.541	2.21579	0.173462	12.7739	2.29465e-37	5.04824e-34	TRUE	UP	ENST00000610460.1
CA2	15.5369	4.92243	0.959771	5.12876	2.91662e-07	5.69229e-05	TRUE	UP	ENSG00000104267.10		RNA5-8SN2-201	790.681	2.20795	0.172067	12.8319	1.08653e-37	2.86844e-34	TRUE	UP	ENST00000612463.1
XIST	13.3231	4.69936	0.986641	4.76299	1.90741e-06	0.000294548	TRUE	UP	ENSG00000229807.13		HSPA1A-201	61.3676	2.1804	0.448935	4.85684	1.19276e-06	0.000349875	TRUE	UP	ENST00000375651.7
UCHL1	21.8522	4.66918	0.755065	6.18381	6.25733e-10	1.75278e-07	TRUE	UP	ENSG00000154277.13		RPL36A-203	64.4485	2.16848	0.443278	4.89193	9.98532e-07	0.000306526	TRUE	UP	ENST00000427805.6
NEFM	8.05609	4.57628	1.25349	3.65082	0.000261409	0.0209911	TRUE	UP	ENSG00000104722.14		RNA5-8SN1-201	773.665	2.16	0.175875	12.2814	1.13958e-34	1.8803e-31	TRUE	UP	ENST00000619471.1
RNA5-8SN1	969.674	3.769	0.155253	24.2765	3.47049e-130	4.18021e-126	TRUE	UP	ENSG00000278189.1		ENST00000702449	260603	2.1276	0.13942	15.2603	1.40561e-52	9.27704e-49	TRUE	UP	ENST00000702449.1
RNA5-8SN5	645.234	3.41394	0.165657	20.6085	2.303e-94	6.93491e-91	TRUE	UP	ENSG00000274917.1		ENST00000638356	267298	2.11396	0.140101	15.0889	1.9175e-51	6.32775e-48	TRUE	UP	ENST00000638356.1
RNA5-8SN4	3270.53	3.38557	0.148799	22.7527	1.34978e-114	8.12907e-111	TRUE	UP	ENSG00000276700.1		HSPA1B-201	38.6532	2.10365	0.566036	3.71647	0.000202028	0.0251582	TRUE	UP	ENST00000375650.5
RN7SL3	10.7647	3.31846	0.831307	3.99185	6.55586e-05	0.00692678	TRUE	UP	ENSG00000278771.1		RPL7-201	63.8172	1.96717	0.43455	4.52691	5.98537e-06	0.00134289	TRUE	UP	ENST00000352983.7
5_8S_rRNA	1324.37	3.27768	0.148231	22.112	2.42288e-108	9.72786e-105	TRUE	UP	ENSG00000275757.1		RPL23A-204	201.993	1.87181	0.261876	7.14769	8.82472e-13	8.96049e-10	TRUE	UP	ENST00000422514.7
JUN	10.5116	3.27541	0.84295	3.88565	0.000102055	0.0099133	TRUE	UP	ENSG00000177606.8		RPL36-201	173.442	1.87174	0.2805	6.67287	2.50844e-11	1.94773e-08	TRUE	UP	ENST00000347512.8
GLO1	8.21335	3.13925	0.933502	3.36288	0.000771347	0.0488993	TRUE	UP	ENSG00000124767.7		RPL9-201	80.1447	1.85502	0.390959	4.7448	2.08708e-06	0.000546425	TRUE	UP	ENST00000295955.14
ID2	9.73806	2.91018	0.824043	3.53159	0.000413076	0.0309037	TRUE	UP	ENSG00000115738.10		RPS3A-201	99.2258	1.81243	0.382486	4.73855	2.15258e-06	0.000546425	TRUE	UP	ENST00000274065.9
ZNF703	11.1373	2.86705	0.768477	3.73082	0.000190856	0.0166584	TRUE	UP	ENSG00000183779.7		RPL36A-209	49.1896	1.76157	0.486939	3.61764	0.000297297	0.0345277	TRUE	UP	ENST00000553110.8
SF3B6	10.8651	2.8497	0.771896	3.69182	0.000222659	0.0185541	TRUE	UP	ENSG00000115128.7		RPL36A-210	60.51	1.76025	0.448596	3.92391	8.71238e-05	0.0122344	TRUE	UP	ENST00000614077.4
HMGB1	14.4962	2.80136	0.652387	4.29402	1.75468e-05	0.00217888	TRUE	UP	ENSG00000189403.15		RPS4X-201	242.396	1.57097	0.243123	6.46164	1.03573e-10	7.59536e-08	TRUE	UP	ENST00000316084.10
RPL7P9	28.5319	2.70381	0.459903	5.87908	4.12543e-09	1.034e-06	TRUE	UP	ENSG00000137970.7		RPL18-208	165.153	1.55118	0.289125	5.36508	8.09139e-08	3.23656e-05	TRUE	UP	ENST00000549920.6
HSP90AA1	21.5622	2.63125	0.523632	5.02499	5.03461e-07	9.06047e-05	TRUE	UP	ENSG00000080824.19		MT-ND3-201	94.891	1.51366	0.370213	4.08863	4.33923e-05	0.0069851	TRUE	UP	ENST00000361227.2
NPM1	34.5809	2.28076	0.407147	5.60181	2.12121e-08	4.82074e-06	TRUE	UP	ENSG00000181163.14		MIR663AHG-223	90.9622	1.48464	0.371093	4.00071	6.31529e-05	0.00947294	TRUE	UP	ENST00000601079.6
MRPL23	17.3679	2.24247	0.575173	3.89877	9.66841e-05	0.00946796	TRUE	UP	ENSG00000214026.11		RPS15-209	268.766	1.45928	0.232189	6.28486	3.2814e-10	2.16572e-07	TRUE	UP	ENST00000592588.7
MT-ND3	85.3759	2.19679	0.265463	8.27533	1.28103e-16	9.07645e-14	TRUE	UP	ENSG00000198840.2		MT-RNR2-201	11573.9	1.4412	0.122877	11.7288	9.07754e-32	1.33137e-28	TRUE	UP	ENST00000387347.2
RPL36AP37	144.476	2.09056	0.208437	10.0297	1.12846e-23	1.13269e-20	TRUE	UP	ENSG00000244398.1		LINC00273-201	248.078	1.43388	0.257677	5.56464	2.62687e-08	1.23838e-05	TRUE	UP	ENST00000539813.1
HSPA1A	75.7885	1.95485	0.263376	7.42227	1.15127e-13	5.77792e-11	TRUE	UP	ENSG00000204389.10		MIF-201	147.414	1.34849	0.302862	4.45251	8.48732e-06	0.0018366	TRUE	UP	ENST00000215754.8
RPL36	234.905	1.9519	0.188191	10.3719	3.32783e-25	4.00837e-22	TRUE	UP	ENSG00000130255.13		RPS2-201	487.775	1.316	0.189519	6.94393	3.81341e-12	3.5955e-09	TRUE	UP	ENST00000343262.9
MIR3648-1	39.0368	1.85041	0.372257	4.9708	6.66783e-07	0.000118109	TRUE	UP	ENSG00000275708.1		RPSA-201	189.222	1.23602	0.271798	4.54755	5.42737e-06	0.00125686	TRUE	UP	ENST00000301821.11
RPS4X	251.245	1.82986	0.177758	10.2941	7.49006e-25	8.20161e-22	TRUE	UP	ENSG00000198034.11		RPLP2-201	225.703	1.21867	0.252616	4.82419	1.40574e-06	0.000394803	TRUE	UP	ENST00000321153.9
RPL7	41.0658	1.81049	0.348769	5.19108	2.09082e-07	4.26847e-05	TRUE	UP	ENSG00000147604.14		RPS10-209	227.858	1.19006	0.25107	4.73996	2.13764e-06	0.000546425	TRUE	UP	ENST00000648437.1
MT-RNR2	11587.9	1.72329	0.110871	15.5432	1.7698e-54	4.26345e-51	TRUE	UP	ENSG00000210082.2		MT-RNR1-201	5748.05	1.15587	0.13056	8.85314	8.50936e-19	1.02112e-15	TRUE	UP	ENST00000389680.2
5_8S_rRNA.1	195.632	1.68312	0.188604	8.92412	4.49257e-19	3.86521e-16	TRUE	UP	ENSG00000273730.1		RPS19-206	199.99	1.1232	0.26124	4.29948	1.71201e-05	0.00332331	TRUE	UP	ENST00000598742.6
RPL9	90.6973	1.66282	0.242515	6.85657	7.05356e-12	2.74065e-09	TRUE	UP	ENSG00000163682.17		RACK1-227	147.737	1.11936	0.301708	3.71009	0.000207187	0.0255595	TRUE	UP	ENST00000512805.6
RPL6	82.9426	1.48165	0.245891	6.02565	1.68426e-09	4.50821e-07	TRUE	UP	ENSG00000089009.16		EEF1A1-201	180.794	1.08021	0.280086	3.85672	0.000114921	0.0153228	TRUE	UP	ENST00000309268.11
RPS15	288.492	1.43886	0.169304	8.49863	1.91835e-17	1.54044e-14	TRUE	UP	ENSG00000115268.10		RPL13-201	151.32	1.06603	0.290304	3.67213	0.000240542	0.028605	TRUE	UP	ENST00000311528.10
PTGES3	29.7123	1.41843	0.41408	3.4255	0.000613673	0.041065	TRUE	UP	ENSG00000110958.16		MT-CYB-201	503.021	0.997704	0.189286	5.27087	1.3578e-07	5.12084e-05	TRUE	UP	ENST00000361789.2
MT-RNR1	5764.79	1.41357	0.122078	11.5793	5.25001e-31	7.90454e-28	TRUE	UP	ENSG00000211459.2		RPS11-201	232.381	0.991537	0.255275	3.8842	0.000102669	0.0139715	TRUE	UP	ENST00000270625.7
RPLP2	259.211	1.35446	0.173827	7.79196	6.59792e-15	3.61236e-12	TRUE	UP	ENSG00000177600.9		H4C3-201	244.088	0.979721	0.251546	3.8948	9.82785e-05	0.0135133	TRUE	UP	ENST00000377803.4
BTF3	46.3596	1.32489	0.332702	3.98221	6.82787e-05	0.00709787	TRUE	UP	ENSG00000145741.17		RPL18A-201	238.168	0.901528	0.24241	3.71902	0.000199996	0.0251582	TRUE	UP	ENST00000222247.10
PSMB1	33.9746	1.31597	0.373778	3.52072	0.000430381	0.0316094	TRUE	UP	ENSG00000008018.9		MT-ATP6-201	654.685	0.742141	0.172322	4.3067	1.65705e-05	0.00326464	TRUE	UP	ENST00000361899.2
RPL18	211.619	1.31481	0.183145	7.17907	7.0189e-13	3.13121e-10	TRUE	UP	ENSG00000063177.13		MT-CO3-201	1616.51	0.659669	0.145741	4.52631	6.00233e-06	0.00134289	TRUE	UP	ENST00000362079.2
RPL18A	132.157	1.30142	0.206433	6.3043	2.89498e-10	8.50488e-08	TRUE	UP	ENSG00000105640.13		ACTB-217	161.156	-1.04115	0.287861	-3.61686	0.000298194	0.0345277	TRUE	DOWN	ENST00000646664.1
MT-CYB	462.04	1.27842	0.158351	8.07338	6.83792e-16	4.11814e-13	TRUE	UP	ENSG00000198727.2		MT-ND6-201	123.149	-1.17383	0.332235	-3.53312	0.00041068	0.0467325	TRUE	DOWN	ENST00000361681.2
RPS27	86.3435	1.27218	0.240885	5.28126	1.28295e-07	2.71108e-05	TRUE	UP	ENSG00000177954.14		RPL37-201	372.484	-1.27004	0.211088	-6.01663	1.7809e-09	1.06854e-06	TRUE	DOWN	ENST00000274242.10
FBL	44.7318	1.26653	0.326195	3.88274	0.000103284	0.00995247	TRUE	UP	ENSG00000105202.9		ACTG1-223	109.834	-1.33733	0.354514	-3.77228	0.00016176	0.0209336	TRUE	DOWN	ENST00000681052.1
RPS15P4	70.856	1.25185	0.267534	4.67923	2.87952e-06	0.000428195	TRUE	UP	ENSG00000233762.3		PFN1-201	126.67	-1.34413	0.332769	-4.03922	5.36299e-05	0.00823156	TRUE	DOWN	ENST00000225655.6
RPL38	195.472	1.20757	0.188222	6.41569	1.4019e-10	4.56374e-08	TRUE	UP	ENSG00000172809.13		ACTG1-205	104.041	-1.41278	0.3542	-3.98864	6.64526e-05	0.00985589	TRUE	DOWN	ENST00000573283.7
H4C3	248.092	1.20682	0.184335	6.54685	5.87622e-11	1.96608e-08	TRUE	UP	ENSG00000197061.5		TMSB10-201	126.578	-1.75598	0.336536	-5.21779	1.81071e-07	6.45985e-05	TRUE	DOWN	ENST00000233143.6
RPS2	612.307	1.1944	0.150159	7.95426	1.80198e-15	1.03357e-12	TRUE	UP	ENSG00000140988.16		ENO1-203	55.1645	-1.83636	0.486437	-3.77511	0.000159934	0.0209023	TRUE	DOWN	ENST00000464920.2
RPS19	284.143	1.19304	0.171722	6.94747	3.71896e-12	1.54465e-09	TRUE	UP	ENSG00000105372.8		ENO1-216	47.8353	-1.87337	0.528359	-3.54564	0.000391667	0.0449566	TRUE	DOWN	ENST00000647408.1
RPS27A	72.7293	1.19179	0.260753	4.57056	4.86434e-06	0.00068129	TRUE	UP	ENSG00000143947.15		ID3-201	57.668	-2.29953	0.495831	-4.63773	3.5226e-06	0.000861081	TRUE	DOWN	ENST00000374561.6
H2AC12	174.98	1.16107	0.324403	3.57909	0.000344795	0.0264526	TRUE	UP	ENSG00000274997.2		CDKN2A-214	54.0589	-2.32449	0.508173	-4.57421	4.78029e-06	0.00112678	TRUE	DOWN	ENST00000579755.2
HMGN2	84.996	1.07756	0.244638	4.40469	1.05935e-05	0.00143369	TRUE	UP	ENSG00000198830.11		MYL6-218	40.6037	-2.59626	0.620816	-4.18201	2.88942e-05	0.0050207	TRUE	DOWN	ENST00000550697.6
RPL31	105.187	1.07436	0.220725	4.8674	1.13074e-06	0.000179207	TRUE	UP	ENSG00000071082.11		ACTB-220	40.4522	-2.6339	0.615198	-4.28139	1.85731e-05	0.00350236	TRUE	DOWN	ENST00000675515.1
RPL24	119.454	0.976908	0.216033	4.52203	6.12497e-06	0.000847991	TRUE	UP	ENSG00000114391.14		ENST00000629969	1121.73	-2.66002	0.175902	-15.1222	1.15661e-51	5.08908e-48	TRUE	DOWN	ENST00000629969.1
RPS11	286.632	0.940948	0.178422	5.27372	1.33689e-07	2.77635e-05	TRUE	UP	ENSG00000142534.7		PRDX1-204	35.1916	-2.83123	0.659032	-4.29604	1.73874e-05	0.00332629	TRUE	DOWN	ENST00000424390.2
RPS28P7	150.479	0.940045	0.201289	4.67013	3.01012e-06	0.000442157	TRUE	UP	ENSG00000227097.5		ACTB-213	60.8469	-2.93586	0.513611	-5.71612	1.08985e-08	5.53309e-06	TRUE	DOWN	ENST00000642480.2
RPL35A	155.38	0.914555	0.196669	4.65022	3.31579e-06	0.000481188	TRUE	UP	ENSG00000182899.17		FTL-201	173.35	-3.00618	0.336745	-8.92717	4.37063e-19	5.76923e-16	TRUE	DOWN	ENST00000331825.11
RPL13	213.255	0.902173	0.177388	5.08589	3.6591e-07	6.99585e-05	TRUE	UP	ENSG00000167526.14		CLU-201	38.9809	-3.12993	0.65332	-4.79081	1.6611e-06	0.00044748	TRUE	DOWN	ENST00000316403.15
RNA5-8SN3	149.549	0.884825	0.208004	4.25389	2.1009e-05	0.00255609	TRUE	UP	ENSG00000275215.1		TKT-207	49.5439	-3.15834	0.583571	-5.4121	6.229e-08	2.74076e-05	TRUE	DOWN	ENST00000462138.6
RPS9	193.135	0.882546	0.191153	4.61696	3.894e-06	0.000551802	TRUE	UP	ENSG00000170889.14		MT2A-201	27.0794	-3.179	0.78575	-4.04582	5.21407e-05	0.00809714	TRUE	DOWN	ENST00000245185.6
ENSG00000227081	95.2838	0.856888	0.23003	3.72512	0.000195225	0.0167964	TRUE	UP	ENSG00000227081.5		ACTB-223	31.7351	-3.24997	0.732811	-4.43494	9.20961e-06	0.00196076	TRUE	DOWN	ENST00000676397.1
RPSA	250.763	0.853816	0.172949	4.93679	7.94172e-07	0.000136654	TRUE	UP	ENSG00000168028.15		ID1-202	27.8656	-3.25601	0.787364	-4.13533	3.54445e-05	0.00592237	TRUE	DOWN	ENST00000376112.4
MT-CO3	744.013	0.852976	0.157514	5.41526	6.12013e-08	1.34031e-05	TRUE	UP	ENSG00000198938.2		ACTB-221	43.8814	-3.32606	0.634332	-5.24341	1.57636e-07	5.78e-05	TRUE	DOWN	ENST00000676189.1
MT-CO2	973.212	0.815651	0.162325	5.02479	5.03986e-07	9.06047e-05	TRUE	UP	ENSG00000198712.1		ACTB-203	22.179	-3.3301	0.877185	-3.79634	0.000146847	0.0193838	TRUE	DOWN	ENST00000425660.5
CHCHD2	89.1587	0.81178	0.234341	3.4641	0.000532015	0.0367166	TRUE	UP	ENSG00000106153.13		PKM-203	26.2801	-3.34933	0.811637	-4.12664	3.68106e-05	0.00607374	TRUE	DOWN	ENST00000389093.7
RPL28	148.185	0.78976	0.198336	3.98194	6.83564e-05	0.00709787	TRUE	UP	ENSG00000108107.15		ACTB-208	56.7184	-3.36824	0.561564	-5.99796	1.99811e-09	1.14674e-06	TRUE	DOWN	ENST00000473257.3
RPS18	307.548	0.782104	0.165287	4.7318	2.2254e-06	0.000335062	TRUE	UP	ENSG00000231500.7		ACTB-209	24.1818	-3.45364	0.8685	-3.97656	6.99191e-05	0.0102421	TRUE	DOWN	ENST00000477812.2
RPL3	143.568	0.763206	0.199424	3.82705	0.000129688	0.0121139	TRUE	UP	ENSG00000100316.16		FTH1-208	24.6385	-3.77485	0.896333	-4.21143	2.53754e-05	0.00465216	TRUE	DOWN	ENST00000532829.5
RPL37A	501.977	0.735425	0.158544	4.63861	3.50762e-06	0.000502968	TRUE	UP	ENSG00000197756.10		SLC7A5-203	29.8047	-3.80332	0.820916	-4.63302	3.60367e-06	0.000864881	TRUE	DOWN	ENST00000565644.5
RACK1	212.143	0.730617	0.184988	3.94953	7.83038e-05	0.00785974	TRUE	UP	ENSG00000204628.12		GAPDH-211	89.8304	-3.81122	0.487375	-7.81989	5.28708e-15	5.81579e-12	TRUE	DOWN	ENST00000619601.1
RPS5	158.857	0.723177	0.191361	3.77912	0.000157384	0.0143613	TRUE	UP	ENSG00000083845.9		FTH1-212	56.1496	-3.98795	0.623309	-6.39803	1.57394e-10	1.09348e-07	TRUE	DOWN	ENST00000620041.4
RPS7	141.081	0.701643	0.202253	3.46914	0.000522136	0.0365647	TRUE	UP	ENSG00000171863.15		FTH1-201	447.145	-3.99492	0.251006	-15.9156	4.93848e-57	6.51879e-53	TRUE	DOWN	ENST00000273550.12
RPL18AP3	121.804	0.697829	0.207928	3.35611	0.000790477	0.0495901	TRUE	UP	ENSG00000213442.5		ACTB-206	23.5482	-4.04059	0.966206	-4.18191	2.89071e-05	0.0050207	TRUE	DOWN	ENST00000462494.5
RPS13	202.902	0.661681	0.179268	3.69102	0.000223358	0.0185541	TRUE	UP	ENSG00000110700.7		SLC7A5-201	30.3944	-4.1087	0.857215	-4.79307	1.64245e-06	0.00044748	TRUE	DOWN	ENST00000261622.5
MT-CO1	594.815	0.643074	0.150173	4.28223	1.85031e-05	0.00227419	TRUE	UP	ENSG00000198804.2		ACTB-219	61.295	-4.1101	0.615131	-6.68166	2.36247e-11	1.94773e-08	TRUE	DOWN	ENST00000674681.1
RPS8	231.106	0.633166	0.174616	3.62604	0.0002878	0.0228692	TRUE	UP	ENSG00000142937.12		KRT18-201	49.2496	-4.12278	0.67951	-6.06727	1.30099e-09	8.17767e-07	TRUE	DOWN	ENST00000388835.4
RPS3	299.277	0.618573	0.168833	3.66381	0.000248492	0.0200878	TRUE	UP	ENSG00000149273.15		HSPB1-201	31.5056	-4.1531	0.850711	-4.88192	1.05058e-06	0.000315173	TRUE	DOWN	ENST00000248553.7
RPLP0	318.929	0.587315	0.173327	3.38849	0.000702793	0.0455115	TRUE	UP	ENSG00000089157.16		TMSB4X-204	45.5054	-4.21711	0.722578	-5.83621	5.34025e-09	2.93714e-06	TRUE	DOWN	ENST00000451311.7
RPL11	129.122	-0.898545	0.215478	-4.17002	3.04576e-05	0.00352752	TRUE	DOWN	ENSG00000142676.14		B4GALT1-201	22.9256	-4.42586	1.07622	-4.11243	3.91519e-05	0.00638031	TRUE	DOWN	ENST00000379731.5
ENSG00000281181	3466.32	-0.909885	0.147436	-6.17137	6.76987e-10	1.85325e-07	TRUE	DOWN	ENSG00000281181.1		SQSTM1-201	15.8939	-4.50953	1.27832	-3.5277	0.000419193	0.0472936	TRUE	DOWN	ENST00000360718.5
MT-ND4	245.949	-1.03617	0.181855	-5.69779	1.2137e-08	2.86648e-06	TRUE	DOWN	ENSG00000198886.2		ACTB-222	24.2609	-4.54214	1.05299	-4.31357	1.60641e-05	0.00321282	TRUE	DOWN	ENST00000676319.1
RPL37	383.935	-1.04341	0.16597	-6.28671	3.24266e-10	9.29949e-08	TRUE	DOWN	ENSG00000145592.14		KRT8-218	24.8538	-4.55069	1.05074	-4.33093	1.4848e-05	0.00301529	TRUE	DOWN	ENST00000692008.1
NDUFS6	61.604	-1.09468	0.313737	-3.48918	0.000484512	0.0347378	TRUE	DOWN	ENSG00000145494.12		CAVIN1-201	20.1751	-4.86631	1.23757	-3.93214	8.4194e-05	0.0119501	TRUE	DOWN	ENST00000357037.6
ACTG1	334.338	-1.24161	0.176023	-7.05367	1.74262e-12	7.49637e-10	TRUE	DOWN	ENSG00000184009.13		SQSTM1-202	19.984	-4.87073	1.24469	-3.91321	9.10765e-05	0.0126548	TRUE	DOWN	ENST00000389805.9
GNAS	62.3503	-1.41132	0.31884	-4.42641	9.58152e-06	0.00131147	TRUE	DOWN	ENSG00000087460.29		TMSB4X-202	21.7079	-4.99323	1.22794	-4.06634	4.77574e-05	0.00757957	TRUE	DOWN	ENST00000380635.5
SRP14	48.9655	-1.45705	0.344675	-4.22731	2.36497e-05	0.0028204	TRUE	DOWN	ENSG00000140319.11		BASP1-203	25.7926	-5.23228	1.19171	-4.39057	1.13055e-05	0.00236877	TRUE	DOWN	ENST00000616743.1
PTMS	37.7515	-1.51345	0.396882	-3.81335	0.000137096	0.0127025	TRUE	DOWN	ENSG00000159335.18		TPM2-202	39.1929	-5.24738	0.972716	-5.39457	6.86888e-08	2.92481e-05	TRUE	DOWN	ENST00000378292.9
RPL10	56.6274	-1.59872	0.328368	-4.8687	1.12335e-06	0.000179207	TRUE	DOWN	ENSG00000147403.18		AKR1C2-201	45.0135	-5.46975	0.964758	-5.66956	1.43165e-08	6.99916e-06	TRUE	DOWN	ENST00000380753.9
GPI	25.5827	-1.65339	0.487619	-3.39074	0.000697051	0.0453837	TRUE	DOWN	ENSG00000105220.17		BASP1-201	35.7923	-5.72724	1.15333	-4.96584	6.8403e-07	0.000220224	TRUE	DOWN	ENST00000322611.4
PKM	184.969	-1.68018	0.207091	-8.11323	4.92901e-16	3.12473e-13	TRUE	DOWN	ENSG00000067225.21		CLU-202	19.5953	-5.84327	1.58701	-3.68193	0.000231471	0.0282909	TRUE	DOWN	ENST00000405140.7
CDKN2A	52.4706	-1.80737	0.350857	-5.15129	2.58698e-07	5.19336e-05	TRUE	DOWN	ENSG00000147889.18		KRT7-201	43.7848	-6.01249	1.12685	-5.33566	9.52001e-08	3.696e-05	TRUE	DOWN	ENST00000331817.6
FLNA	84.3221	-1.87171	0.28157	-6.64742	2.98265e-11	1.05665e-08	TRUE	DOWN	ENSG00000196924.19		SPINK6-201	25.3215	-6.2293	1.55508	-4.00577	6.18147e-05	0.00937878	TRUE	DOWN	ENST00000325630.3
LAMP1	22.1985	-1.90479	0.544391	-3.49893	0.000467125	0.0336918	TRUE	DOWN	ENSG00000185896.11		TRIM16L-204	10.1688	-6.36917	1.74814	-3.6434	0.00026906	0.0317106	TRUE	DOWN	ENST00000449552.6
CLPTM1L	22.8921	-1.96324	0.542567	-3.61842	0.000296411	0.0231836	TRUE	DOWN	ENSG00000049656.14		COL5A1-202	10.4027	-6.40143	1.74306	-3.67253	0.000240165	0.028605	TRUE	DOWN	ENST00000371820.4
CLTA	22.6892	-2.06005	0.560707	-3.67402	0.000238763	0.0195639	TRUE	DOWN	ENSG00000122705.18		MCAM-201	10.4466	-6.40708	1.74435	-3.67304	0.000239685	0.028605	TRUE	DOWN	ENST00000264036.6
LARP1	19.393	-2.13928	0.613617	-3.48635	0.000489667	0.0348996	TRUE	DOWN	ENSG00000155506.19		FTH1-210	29.5237	-6.44376	1.53924	-4.18633	2.83502e-05	0.0050207	TRUE	DOWN	ENST00000534180.1
ID3	61.7974	-2.161	0.340198	-6.35217	2.12304e-10	6.55692e-08	TRUE	DOWN	ENSG00000117318.9		S100A4-201	10.8485	-6.46116	1.73762	-3.7184	0.000200487	0.0251582	TRUE	DOWN	ENST00000354332.8
TUBB	44.2709	-2.18548	0.400311	-5.45946	4.77575e-08	1.06526e-05	TRUE	DOWN	ENSG00000196230.14		LMNA-231	10.9506	-6.47539	1.72974	-3.74356	0.000181432	0.0232515	TRUE	DOWN	ENST00000675881.1
SLC3A2	28.0646	-2.1941	0.507964	-4.3194	1.56455e-05	0.00196302	TRUE	DOWN	ENSG00000168003.19		AKR1C2-202	12.0684	-6.61527	1.70751	-3.87422	0.000106969	0.0144081	TRUE	DOWN	ENST00000421196.7
ACTB	533.016	-2.23125	0.171458	-13.0134	1.02632e-38	1.76601e-35	TRUE	DOWN	ENSG00000075624.17		IFITM3-201	12.8063	-6.70076	1.69472	-3.9539	7.68867e-05	0.0110316	TRUE	DOWN	ENST00000399808.5
CAPZB	16.5688	-2.24369	0.662507	-3.38666	0.000707494	0.0455709	TRUE	DOWN	ENSG00000077549.19		MT1E-201	13.7484	-6.8042	1.67425	-4.06403	4.82337e-05	0.00757957	TRUE	DOWN	ENST00000306061.10
MSN	17.4146	-2.313	0.658109	-3.51461	0.000440395	0.0321488	TRUE	DOWN	ENSG00000147065.18		TRIM16L-215	14.786	-6.90817	1.66376	-4.15214	3.29377e-05	0.00557407	TRUE	DOWN	ENST00000641936.1
ENSG00000281383	584.312	-2.4058	0.176793	-13.608	3.58702e-42	7.20093e-39	TRUE	DOWN	ENSG00000281383.1		MYL9-201	15.1582	-6.94517	1.65418	-4.19855	2.6863e-05	0.00485742	TRUE	DOWN	ENST00000279022.7
RPL3P4	21.0955	-2.4653	0.613481	-4.01855	5.85567e-05	0.0063542	TRUE	DOWN	ENSG00000232573.1		CLU-215	17.3576	-7.13926	1.6365	-4.36251	1.28577e-05	0.00265191	TRUE	DOWN	ENST00000523500.5
VIM	16.6362	-2.47079	0.698958	-3.53496	0.000407837	0.0307025	TRUE	DOWN	ENSG00000026025.16		S100A6-201	101.014	-7.23118	1.07221	-6.7442	1.53872e-11	1.35407e-08	TRUE	DOWN	ENST00000368719.9
PRDX5	19.5859	-2.51472	0.641424	-3.92052	8.83579e-05	0.00872353	TRUE	DOWN	ENSG00000126432.14		NQO1-201	18.6499	-7.24465	1.61771	-4.47835	7.52225e-06	0.0016549	TRUE	DOWN	ENST00000320623.10
MYH9	31.1163	-2.62148	0.518793	-5.05303	4.34844e-07	8.058e-05	TRUE	DOWN	ENSG00000100345.23		AKR1C3-201	21.4477	-7.44651	1.59725	-4.66209	3.13018e-06	0.000779591	TRUE	DOWN	ENST00000380554.5
TKT	69.0231	-2.6619	0.351382	-7.57552	3.57686e-14	1.87319e-11	TRUE	DOWN	ENSG00000163931.17		TGFBI-201	24.677	-7.64795	1.57742	-4.84839	1.24467e-06	0.000357165	TRUE	DOWN	ENST00000442011.7
ANXA2	105.838	-2.74668	0.297528	-9.23168	2.66424e-20	2.46852e-17	TRUE	DOWN	ENSG00000182718.18		SPINK6-203	25.9628	-7.7211	1.57161	-4.91286	8.97589e-07	0.0002821	TRUE	DOWN	ENST00000621437.4
CFL1	42.0934	-2.75814	0.458554	-6.01486	1.80037e-09	4.71423e-07	TRUE	DOWN	ENSG00000172757.13		S100A4-204	30.1045	-7.93516	1.55446	-5.10476	3.31217e-07	0.000109301	TRUE	DOWN	ENST00000368716.9
ACTN4	25.8613	-2.78527	0.586592	-4.74822	2.05212e-06	0.000312884	TRUE	DOWN	ENSG00000130402.14		BEST1-202	30.7403	-7.96497	1.55249	-5.13045	2.89051e-07	9.78327e-05	TRUE	DOWN	ENST00000449131.6
FTL	158.47	-2.80681	0.260202	-10.787	3.96324e-27	5.30413e-24	TRUE	DOWN	ENSG00000087086.15		KRT8-216	32.3401	-8.03819	1.54741	-5.19461	2.05148e-07	7.12618e-05	TRUE	DOWN	ENST00000552551.5
BAG1	18.364	-2.87416	0.714717	-4.0214	5.78544e-05	0.00633506	TRUE	DOWN	ENSG00000107262.26		S100A6-205	37.6655	-8.25821	1.53355	-5.38501	7.24386e-08	2.98809e-05	TRUE	DOWN	ENST00000496817.5
CDKN2C	13.3368	-3.04459	0.864684	-3.52104	0.00042986	0.0316094	TRUE	DOWN	ENSG00000123080.12		KRT17-201	43.6344	-8.46985	1.52399	-5.55769	2.73364e-08	1.24428e-05	TRUE	DOWN	ENST00000311208.13
VCP	20.3386	-3.06736	0.700577	-4.37834	1.19589e-05	0.00158291	TRUE	DOWN	ENSG00000165280.18		LGALS1-201	49.8141	-8.6615	1.51308	-5.72443	1.0378e-08	5.4796e-06	TRUE	DOWN	ENST00000215909.10
MT2A	27.5984	-3.07964	0.606858	-5.07473	3.88052e-07	7.30326e-05	TRUE	DOWN	ENSG00000125148.7
TXNRD1	14.5095	-3.14337	0.856674	-3.66928	0.000243236	0.0197958	TRUE	DOWN	ENSG00000198431.18
ID1	33.8292	-3.23443	0.565966	-5.71488	1.0978e-08	2.6446e-06	TRUE	DOWN	ENSG00000125968.9
LMNA	46.8895	-3.29176	0.485768	-6.77641	1.23199e-11	4.49678e-09	TRUE	DOWN	ENSG00000160789.24
LITAF	12.0052	-3.33651	0.980756	-3.40198	0.000669007	0.0440338	TRUE	DOWN	ENSG00000189067.14
HSPB1	43.8233	-3.46428	0.523689	-6.61515	3.71178e-11	1.27738e-08	TRUE	DOWN	ENSG00000106211.10
PFN1	40.9924	-3.53362	0.552002	-6.40146	1.53902e-10	4.87828e-08	TRUE	DOWN	ENSG00000108518.8
TLN1	13.773	-3.54885	0.954597	-3.71765	0.000201087	0.017057	TRUE	DOWN	ENSG00000137076.22
CCN1	14.0209	-3.57874	0.95578	-3.74431	0.000180891	0.01626	TRUE	DOWN	ENSG00000142871.18
HLA-A	14.9415	-3.66129	0.944695	-3.87563	0.000106349	0.0101665	TRUE	DOWN	ENSG00000206503.14
SERPINH1	15.7463	-3.75697	0.939145	-4.00042	6.32303e-05	0.00673991	TRUE	DOWN	ENSG00000149257.16
TPM4	12.6183	-4.03868	1.1392	-3.5452	0.00039231	0.0297193	TRUE	DOWN	ENSG00000167460.17
TMSB4X	65.6446	-4.10056	0.504283	-8.13146	4.24133e-16	2.83816e-13	TRUE	DOWN	ENSG00000205542.11
G6PD	13.8692	-4.17679	1.12039	-3.72799	0.000193015	0.0167256	TRUE	DOWN	ENSG00000160211.20
PLEC	13.9191	-4.18504	1.11973	-3.73754	0.000185827	0.016458	TRUE	DOWN	ENSG00000178209.17
CLU	72.4623	-4.24555	0.503746	-8.42796	3.51748e-17	2.648e-14	TRUE	DOWN	ENSG00000120885.22
FBLN1	14.6896	-4.26444	1.11432	-3.82696	0.000129738	0.0121139	TRUE	DOWN	ENSG00000077942.19
TPM2	53.3324	-4.32011	0.592879	-7.28667	3.17711e-13	1.48461e-10	TRUE	DOWN	ENSG00000198467.16
MYL6	27.2674	-4.59015	0.895133	-5.12789	2.93003e-07	5.69229e-05	TRUE	DOWN	ENSG00000092841.19
CAVIN1	18.3174	-4.59545	1.0997	-4.17882	2.93029e-05	0.00346033	TRUE	DOWN	ENSG00000177469.13
KRT18	30.2092	-4.74228	0.890578	-5.32495	1.00982e-07	2.17202e-05	TRUE	DOWN	ENSG00000111057.11
B4GALT1	20.4408	-4.75016	1.09468	-4.33931	1.42931e-05	0.00185119	TRUE	DOWN	ENSG00000086062.13
IFITM3	13.3005	-5.1462	1.50175	-3.42681	0.000610711	0.041065	TRUE	DOWN	ENSG00000142089.17
BST2	13.5116	-5.18404	1.49759	-3.4616	0.000536979	0.0367495	TRUE	DOWN	ENSG00000130303.14
BASP1	55.7089	-5.22627	0.757559	-6.89882	5.24362e-12	2.10531e-09	TRUE	DOWN	ENSG00000176788.9
SLC7A5	49.3645	-5.46851	0.867138	-6.30639	2.85625e-10	8.50488e-08	TRUE	DOWN	ENSG00000103257.9
CRIP2	5.92001	-5.47017	1.62501	-3.36624	0.000761992	0.0485619	TRUE	DOWN	ENSG00000182809.11
KRT19	5.92001	-5.47017	1.62501	-3.36624	0.000761992	0.0485619	TRUE	DOWN	ENSG00000171345.13
NNMT	6.13907	-5.52015	1.61825	-3.41119	0.000646804	0.0428063	TRUE	DOWN	ENSG00000166741.8
DGKD	6.18135	-5.52821	1.61926	-3.41403	0.000640101	0.0425968	TRUE	DOWN	ENSG00000077044.11
ENSG00000275216	6.23129	-5.54485	1.61811	-3.42676	0.000610839	0.041065	TRUE	DOWN	ENSG00000275216.2
TNFRSF12A	6.23129	-5.54485	1.61811	-3.42676	0.000610839	0.041065	TRUE	DOWN	ENSG00000006327.14
FAM83H	6.28705	-5.54872	1.63315	-3.39756	0.000679885	0.0445066	TRUE	DOWN	ENSG00000180921.7
GPC1	6.40806	-5.58468	1.6125	-3.46337	0.00053345	0.0367166	TRUE	DOWN	ENSG00000063660.9
ETS2	6.40806	-5.58468	1.6125	-3.46337	0.00053345	0.0367166	TRUE	DOWN	ENSG00000157557.13
GPRC5A	6.4292	-5.58854	1.6109	-3.4692	0.000522018	0.0365647	TRUE	DOWN	ENSG00000013588.9
ENG	6.57719	-5.61541	1.61604	-3.4748	0.000511227	0.036222	TRUE	DOWN	ENSG00000106991.14
ITGA11	6.69054	-5.64209	1.60659	-3.51185	0.000445002	0.0322894	TRUE	DOWN	ENSG00000137809.17
CD59	6.71934	-5.6538	1.6057	-3.52108	0.000429794	0.0316094	TRUE	DOWN	ENSG00000085063.18
SLPI	7.11517	-5.73378	1.59364	-3.59792	0.000320773	0.0249272	TRUE	DOWN	ENSG00000124107.5
ARHGAP23	7.27081	-5.76537	1.5903	-3.62533	0.000288594	0.0228692	TRUE	DOWN	ENSG00000275832.5
GSN	7.66664	-5.83948	1.58336	-3.68803	0.000225995	0.0186446	TRUE	DOWN	ENSG00000148180.22
KRT8	65.3301	-5.8793	0.859181	-6.84291	7.75983e-12	2.92085e-09	TRUE	DOWN	ENSG00000170421.13
IGFBP4	7.87221	-5.8821	1.58057	-3.72152	0.00019803	0.0169168	TRUE	DOWN	ENSG00000141753.7
L1CAM	7.93563	-5.89147	1.57707	-3.7357	0.000187197	0.0164583	TRUE	DOWN	ENSG00000198910.14
TM4SF1	7.94329	-5.89792	1.58925	-3.71114	0.000206329	0.0173793	TRUE	DOWN	ENSG00000169908.12
[truncated: 28 more rows]

## Sheet: PromethION_10R_DTU_HEK_HeLa
Differential transcript usage (DTU) between HEK293 and HeLa as analyzed by DEXSeq (left) and DRIMSeq (right). Data was collected 24-hours post-sequencing initiation. Transcript isoforms highlighted in green appear in both analyses.
[truncated: 94 more rows]

[truncated: 2 more sheets: PromethION_2R_DTU_HEK_HeLa, MinION_DEG_DET_HEK_HeLa]
