# Supplementary material for: Real-time transcriptomic profiling in distinct experimental conditions
Source: eLife. 2026 May 5;13:RP98768. doi: 10.7554/eLife.98768 (PMC13143281; doi:10.7554/eLife.98768)
Supplement: Figure 6—source data 1. [file elife-98768-fig6-data1.xlsx]

## Sheet: General_Sequencing_Setup2
Source Data 5. General sequencing overview of Yeast setup 2. Total reads per time point were obtained via MinKnow software (ONT) while mapped reads, gene counts, and transcript counts was obtained from NanopoReaTA.
				Total reads					mapped_reads					gene_counts					transcript_counts
	Sample	Replicates	Barcode #	1hr	2hr	5hr	10hr	24hr	1hr	2hr	5hr	10hr	24hr	1hr	2hr	5hr	10hr	24hr	1hr	2hr	5hr	10hr	24hr
Yeast Setup 2	WT, pEV(His3)	R1	1	29619	75624	190702	344227	633802	23853	59629	150983	273995	500183	14010	33690	81939	148729	277357	18752	46303	115018	207846	382749
		R2	2	43066	112126	286921	517354	943633	31875	87617	226815	413709	755602	16612	42607	104165	189415	356885	25323	68338	173015	314109	375665
		R3	3	44916	116318	294781	527901	960249	35896	91736	231236	418528	761191	17541	41656	97768	177991	336260	29917	75050	185036	220851	399318
	rkr1Δ::HphMX, pEV(Ura3)	R1	13	59667	160162	418843	754921	1370538	47926	131769	339337	614672	1117332	23193	61324	153469	277817	512140	37464	101539	258506	468062	855129
		R2	14	47014	125904	327493	589488	1065211	35940	103840	267491	487003	877933	17159	47219	117935	215250	394985	27887	79715	203032	368621	667348
		R3	15	41880	111747	289681	520462	941661	31958	87862	227601	415146	750181	14987	39257	98015	179434	330305	24691	67258	171837	312545	567096
	rkr1Δ::HphMX, pJLP2-HA(Ura3)	R1	16	54455	148485	387711	695377	1258995	43929	119824	319485	570911	1033692	20682	54677	142615	254803	465629	34156	92514	243537	433658	789161
		R2	17	48664	130761	341595	614624	1112947	35956	103862	271558	487095	886101	17617	48940	124639	224131	414067	28097	80354	208025	372020	679608
		R3	18	48524	130928	341596	613559	1109065	35924	99733	267243	478534	865159	17620	47154	123208	220871	404468	28394	77849	206222	368491	669177
	jlp2Δ::KanMX rkr1Δ::HphMX, pEV(Ura3)	R1	19	58174	156941	410636	737489	1331543	43889	123666	319119	574365	1036799	22122	60103	150776	271530	496758	35738	99615	254695	457610	829235
		R2	20	54670	149579	394579	708563	1275432	43909	119729	319187	578402	1036879	20076	52393	135115	245446	446359	34966	94577	248928	449393	809238
		R3	21	61223	167110	442528	796225	1427581	47887	131654	351002	638037	1140084	26632	71113	185972	337767	607489	38686	105747	279300	506577	908596
	jlp2Δ::KanMX rkr1Δ::HphMX, pJLP2-HA(Ura3)	R1	22	49923	137479	365210	655729	1175418	39916	107708	287126	518325	932720	19103	49754	129291	233560	425847	31344	83660	220763	397568	719041
		R2	23	44775	121147	317157	570355	1.02716e+06	35950	95868	251633	455251	822366	16276	41491	104870	190367	349363	27811	73412	190004	342424	621679
		R3	24	47564	126806	330292	594552	1073218	35926	99794	263438	470884	853637	18578	49364	125844	225357	414252	28367	77842	202532	361002	657811

## Sheet: Rkr1Δ_pJlp2_vs_Rkr1Δ_pEV(
Differentially expressed genes (left) and transcripts (right) in rkr1Δ-pJlp2(URA3) vs rkr1Δ-pEV(URA3), per each time point. Data was collected 1-hour, 2-hours, 5hours, 10-hours and 24-hours post-sequencing initiation. The same time points for DEGs and DETs are shown in the same row.
Differential Gene expression											Differential Transcript expression
1 hour post-sequencing initiation											1 hour post-sequencing initiation
gene name	gene base mean	log 2 fold change	lfcSE	stat	p-value	p-adjusted	significance	significance_reg	gene ID		transcript name	transcript base mean	log 2 fold change	lfcSE	stat	p-value	p-adjusted	significance	significance_reg	gene ID
JLP2	90.9891	7.11982	0.758114	9.39149	5.91549e-21	2.92225e-17	TRUE	UP	YMR132C		JLP2	93.7621	7.16014	0.757456	9.45288	3.29644e-21	1.75239e-17	TRUE	UP	YMR132C_mRNA
RPL15A	66.9883	2.41177	0.344842	6.99386	2.67422e-12	6.60533e-09	TRUE	UP	YLR029C		RPL15A	67.0067	2.37966	0.342795	6.94193	3.86783e-12	1.02807e-08	TRUE	UP	YLR029C_mRNA
2 hour post-sequencing initiation											2 hour post-sequencing initiation
gene name	gene base mean	log 2 fold change	lfcSE	stat	p-value	p-adjusted	significance	significance_reg	gene ID		transcript name	transcript base mean	log 2 fold change	lfcSE	stat	p-value	p-adjusted	significance	significance_reg	gene ID
JLP2	195.527	7.03757	0.524172	13.4261	4.25459e-41	2.3847e-37	TRUE	UP	YMR132C		JLP2	201.462	6.9259	0.501027	13.8234	1.84146e-43	1.23378e-40	TRUE	UP	YMR132C_mRNA
RPL15A	189.976	2.2292	0.258427	8.62603	6.35171e-18	1.78007e-14	TRUE	UP	YLR029C		RPL15A	189.352	2.19789	0.256758	8.56014	1.12733e-17	3.77654e-15	TRUE	UP	YLR029C_mRNA
RPL13A	58.1938	1.78719	0.399422	4.47445	7.66079e-06	0.00715646	TRUE	UP	YDL082W		COR1	13.129	2.10082	0.624754	3.36264	0.000772011	0.0469588	TRUE	UP	YBL045C_mRNA
ACT1	86.7525	1.76725	0.361198	4.89276	9.94329e-07	0.0013933	TRUE	UP	YFL039C		RPL13A	57.741	1.75731	0.397268	4.42349	9.71182e-06	0.00130138	TRUE	UP	YDL082W_mRNA
ZEO1	216.115	1.16705	0.228935	5.09776	3.43698e-07	0.000642142	TRUE	UP	YOL109W		VMA4	37.0851	1.49093	0.426862	3.49278	0.000478019	0.0320273	TRUE	UP	YOR332W_mRNA
RPS15	192.768	1.01157	0.225768	4.48059	7.4437e-06	0.00715646	TRUE	UP	YOL040C		ACT1	99.0148	1.41288	0.329576	4.28697	1.8113e-05	0.00202262	TRUE	UP	YFL039C_mRNA
RPL19A	134.378	0.954695	0.229256	4.16432	3.12276e-05	0.0250044	TRUE	UP	YBR084C-A		RPL8B	65.1869	1.13231	0.306624	3.69284	0.000221761	0.0165089	TRUE	UP	YLL045C_mRNA
RPS12	365.362	0.728557	0.182523	3.9916	6.56281e-05	0.0459807	TRUE	UP	YOR369C		ZEO1	216.82	1.12872	0.224933	5.01804	5.22007e-07	0.000116582	TRUE	UP	YOL109W_mRNA
											RPS15	192.082	0.990571	0.222316	4.45569	8.36226e-06	0.00130138	TRUE	UP	YOL040C_mRNA
											RPL19A	133.201	0.952038	0.226827	4.1972	2.7023e-05	0.00258649	TRUE	UP	YBR084C-A_mRNA
											RPS12	365.879	0.695203	0.180106	3.85996	0.000113405	0.00949764	TRUE	UP	YOR369C_mRNA
											TMA10	85.8929	-0.885942	0.265338	-3.33892	0.000841053	0.0469588	TRUE	DOWN	YLR327C_mRNA
5 hour post-sequencing initiation											5 hour post-sequencing initiation
gene name	gene base mean	log 2 fold change	lfcSE	stat	p-value	p-adjusted	significance	significance_reg	gene ID		transcript name	transcript base mean	log 2 fold change	lfcSE	stat	p-value	p-adjusted	significance	significance_reg	gene ID
JLP2	436.626	6.9668	0.37437	18.6094	2.69601e-77	3.12467e-74	TRUE	UP	YMR132C		JLP2	456.27	6.77058	0.346197	19.557	3.59574e-85	6.72044e-82	TRUE	UP	YMR132C_mRNA
ARD1	14.78	2.76742	0.634945	4.35852	1.30946e-05	0.00151766	TRUE	UP	YHR013C		SHM1	24.5308	3.15593	0.533766	5.91257	3.3681e-09	1.57374e-06	TRUE	UP	YBR263W_mRNA
RPL15A	487.225	2.31252	0.223358	10.3534	4.03813e-25	2.3401e-22	TRUE	UP	YLR029C		SEC65	9.21767	2.7942	0.797008	3.50586	0.000455131	0.0315052	TRUE	UP	YML105C_mRNA
RTN2	23.7562	2.05665	0.535706	3.83914	0.000123468	0.00794999	TRUE	UP	YDL204W		ARD1	14.7336	2.75954	0.620906	4.44438	8.81467e-06	0.00149769	TRUE	UP	YHR013C_mRNA
PHO3	26.6261	2.00341	0.495335	4.04456	5.24224e-05	0.0040505	TRUE	UP	YBR092C		FTH1	8.59741	2.74652	0.781492	3.51446	0.000440655	0.0315052	TRUE	UP	YBR207W_mRNA
CCT5	21.9915	1.98529	0.493931	4.01936	5.83557e-05	0.00422714	TRUE	UP	YJR064W		BNA5	12.15	2.72212	0.662762	4.10723	4.00431e-05	0.00415781	TRUE	UP	YLR231C_mRNA
NA.1	19.4129	1.96736	0.53365	3.68661	0.000227261	0.0119725	TRUE	UP	YOL071W		RPL15A	490.493	2.27801	0.211135	10.7894	3.86423e-27	3.61112e-24	TRUE	UP	YLR029C_mRNA
EMG1	26.6856	1.93792	0.467384	4.1463	3.37891e-05	0.00301242	TRUE	UP	YLR186W		RTN2	23.684	2.05076	0.520425	3.94054	8.12976e-05	0.0069066	TRUE	UP	YDL204W_mRNA
PIS1	40.9031	1.86343	0.405125	4.59965	4.23196e-06	0.000613106	TRUE	UP	YPR113W		PHO3	26.7068	2.00785	0.477361	4.20614	2.59772e-05	0.00323675	TRUE	UP	YBR092C_mRNA
RBG2	14.0215	1.8604	0.561775	3.31165	0.000927471	0.0398126	TRUE	UP	YGR173W		CCT5	22.0884	1.98896	0.481117	4.13405	3.56425e-05	0.00391857	TRUE	UP	YJR064W_mRNA
SFT2	27.1196	1.84189	0.44212	4.16605	3.09917e-05	0.00301242	TRUE	UP	YBL102W		EMG1	26.6255	1.92949	0.452062	4.26819	1.97068e-05	0.00283323	TRUE	UP	YLR186W_mRNA
ACT1	221.648	1.80419	0.516976	3.48989	0.000483217	0.0243499	TRUE	UP	YFL039C		SFT2	30.2058	1.8681	0.42504	4.39512	1.10712e-05	0.00172434	TRUE	UP	YBL102W_mRNA
DED81	22.3567	1.76813	0.545018	3.24417	0.00117793	0.0470766	TRUE	UP	YHR019C		PIS1	40.9626	1.86329	0.391052	4.76482	1.8902e-06	0.000392531	TRUE	UP	YPR113W_mRNA
TUB1	24.7888	1.76024	0.520982	3.37869	0.000728324	0.0337651	TRUE	UP	YML085C		HOC1	17.3254	1.78185	0.510353	3.49141	0.000480482	0.0320722	TRUE	UP	YJR075W_mRNA
ERG2	56.1323	1.74477	0.345004	5.05725	4.25335e-07	0.000123241	TRUE	UP	YMR202W		TUB1	25.0291	1.77564	0.503396	3.52733	0.000419781	0.0313828	TRUE	UP	YML085C_mRNA
ARC40	20.8364	1.51322	0.471234	3.21119	0.00132185	0.0478756	TRUE	UP	YBR234C		DED81	22.9685	1.74516	0.519065	3.36212	0.000773458	0.0444993	TRUE	UP	YHR019C_mRNA
COR1	29.8695	1.48932	0.447754	3.3262	0.000880373	0.0392443	TRUE	UP	YBL045C		ERG2	58.2965	1.68764	0.330434	5.10736	3.26698e-07	0.000110593	TRUE	UP	YMR202W_mRNA
SML1	64.2466	1.36832	0.313032	4.37118	1.2358e-05	0.00151766	TRUE	UP	YML058W		SDH5	21.0857	1.68387	0.484144	3.47803	0.000505109	0.0325534	TRUE	UP	YOL071W_mRNA
PDC1	109.833	1.29109	0.311325	4.14707	3.36754e-05	0.00301242	TRUE	UP	YLR044C		COR1	29.1492	1.48218	0.441408	3.35785	0.000785516	0.0444993	TRUE	UP	YBL045C_mRNA
ZEO1	551.346	1.25549	0.21666	5.79474	6.84281e-09	2.64361e-06	TRUE	UP	YOL109W		SML1	63.6777	1.34767	0.30019	4.4894	7.14255e-06	0.00133494	TRUE	UP	YML058W_mRNA
SGT2	76.7058	1.21557	0.297649	4.0839	4.42869e-05	0.00366632	TRUE	UP	YOR007C		ZEO1	558.507	1.21636	0.203719	5.97077	2.36144e-09	1.47117e-06	TRUE	UP	YOL109W_mRNA
PDX3	44.4077	1.16138	0.357034	3.25285	0.00114253	0.0470766	TRUE	UP	YBR035C		SGT2	78.1021	1.18905	0.281546	4.22329	2.40767e-05	0.00321424	TRUE	UP	YOR007C_mRNA
UBC4	78.4129	1.07356	0.28686	3.74246	0.000182226	0.0100571	TRUE	UP	YBR082C		PDX3	44.3525	1.15377	0.343612	3.35778	0.000785702	0.0444993	TRUE	UP	YBR035C_mRNA
CDC48	81.178	1.05311	0.278848	3.77663	0.000158962	0.00921186	TRUE	UP	YDL126C		VMA4	109.671	1.12486	0.315908	3.56073	0.000369832	0.0288007	TRUE	UP	YOR332W_mRNA
HSP26	65.8451	1.02682	0.303039	3.38842	0.000702975	0.0337651	TRUE	UP	YBR072W		UBC4	78.9414	1.08339	0.274058	3.95315	7.71296e-05	0.00686453	TRUE	UP	YBR082C_mRNA
RPS15	520.216	0.989428	0.205458	4.81573	1.46666e-06	0.000339971	TRUE	UP	YOL040C		CDC48	81.4957	1.03517	0.268636	3.85342	0.000116479	0.00946517	TRUE	UP	YDL126C_mRNA
PDB1	110.122	0.972705	0.301309	3.22826	0.00124544	0.0478756	TRUE	UP	YBR221C		HSP26	66.8648	0.994314	0.29026	3.42559	0.00061346	0.0382185	TRUE	UP	YBR072W_mRNA
RPL23A	480.354	0.942448	0.29306	3.21589	0.0013004	0.0478756	TRUE	UP	YBL087C		RPL8B	169.273	0.981349	0.247726	3.96142	7.45046e-05	0.00686453	TRUE	UP	YLL045C_mRNA
RPL19A	371.098	0.941704	0.199887	4.71119	2.46272e-06	0.000475715	TRUE	UP	YBR084C-A		RPS15	523.226	0.980317	0.192536	5.09161	3.55035e-07	0.000110593	TRUE	UP	YOL040C_mRNA
RPS12	930.317	0.858066	0.18459	4.64849	3.34369e-06	0.00055362	TRUE	UP	YOR369C		PDB1	110.325	0.970865	0.292104	3.3237	0.000888313	0.0474359	TRUE	UP	YBR221C_mRNA
15S_RRNA	680.877	-0.654917	0.205308	-3.18992	0.00142312	0.0499817	TRUE	DOWN	Q0020		RPL19A	373.174	0.936506	0.188631	4.96476	6.87878e-07	0.000183663	TRUE	UP	YBR084C-A_mRNA
TMA10	243.119	-0.756782	0.198618	-3.81023	0.000138839	0.00846918	TRUE	DOWN	YLR327C		RPS12	941.076	0.839318	0.171705	4.88813	1.01798e-06	0.000237826	TRUE	UP	YOR369C_mRNA
											KRS1	181.67	0.748287	0.225789	3.31411	0.00091937	0.0477306	TRUE	UP	YDR037W_mRNA
											RPS7A	220.553	-0.690317	0.207659	-3.32429	0.000886451	0.0474359	TRUE	DOWN	YOR096W_mRNA
											TMA10	244.462	-0.757998	0.187441	-4.04393	5.25632e-05	0.00517056	TRUE	DOWN	YLR327C_mRNA
10 hour post-sequencing initiation											10 hour post-sequencing initiation
gene name	gene base mean	log 2 fold change	lfcSE	stat	p-value	p-adjusted	significance	significance_reg	gene ID		transcript name	transcript base mean	log 2 fold change	lfcSE	stat	p-value	p-adjusted	significance	significance_reg	gene ID
JLP2	775.246	6.67542	0.280438	23.8035	3.07148e-125	7.98277e-122	TRUE	UP	YMR132C		JLP2	815.15	6.17024	0.261098	23.6319	1.81307e-123	4.32418e-120	TRUE	UP	YMR132C_mRNA
ARD1	26.596	2.33976	0.487991	4.79469	1.62928e-06	0.000302464	TRUE	UP	YHR013C		SHM1	46.1382	2.89879	0.408414	7.09766	1.26889e-12	1.00876e-09	TRUE	UP	YBR263W_mRNA
RPL15A	880.792	2.2464	0.197925	11.3498	7.43587e-30	9.66291e-27	TRUE	UP	YLR029C		BNA5	21.4072	2.33772	0.498821	4.68648	2.77943e-06	0.000414309	TRUE	UP	YLR231C_mRNA
SEC65	15.746	2.10199	0.57304	3.66815	0.000244315	0.0186757	TRUE	UP	YML105C		ARD1	26.5458	2.3322	0.482984	4.82874	1.374e-06	0.000218465	TRUE	UP	YHR013C_mRNA
ERG2	103.48	2.07364	0.28955	7.1616	7.97411e-13	6.90824e-10	TRUE	UP	YMR202W		RPL15A	891.485	2.21573	0.199295	11.1179	1.02698e-28	1.22467e-25	TRUE	UP	YLR029C_mRNA
FTH1	13.9899	1.98178	0.583603	3.39578	0.000684342	0.0395245	TRUE	UP	YBR207W		MSY1	10.9575	2.04448	0.626432	3.26369	0.00109972	0.0447531	TRUE	UP	YPL097W_mRNA
TYW1	13.0044	1.87155	0.564676	3.31437	0.00091849	0.0470555	TRUE	UP	YPL207W		FTH1	14.3018	2.01473	0.567651	3.54923	0.000386353	0.0224744	TRUE	UP	YBR207W_mRNA
PRE5	22.9548	1.85018	0.451477	4.09806	4.16632e-05	0.00451178	TRUE	UP	YMR314W		SDH5	39.1545	2.01459	0.384437	5.24036	1.60266e-07	4.77794e-05	TRUE	UP	YOL071W_mRNA
LYS21	25.7877	1.84865	0.510172	3.62358	0.000290551	0.0210345	TRUE	UP	YDL131W		SEC65	16.5369	1.98936	0.55284	3.59844	0.00032013	0.0200924	TRUE	UP	YML105C_mRNA
EMG1	49.8092	1.83484	0.362307	5.06432	4.09855e-07	0.000105991	TRUE	UP	YLR186W		ERG2	107.414	1.93434	0.283937	6.81256	9.58793e-12	5.7168e-09	TRUE	UP	YMR202W_mRNA
POM33	17.3737	1.83465	0.516161	3.55441	0.00037883	0.02591	TRUE	UP	YLL023C		TYW1	13.0003	1.86151	0.558207	3.33481	0.000853583	0.0392287	TRUE	UP	YPL207W_mRNA
HOC1	19.2204	1.82702	0.488733	3.73827	0.000185288	0.0160521	TRUE	UP	YJR075W		LYS21	26.8978	1.85927	0.498616	3.72886	0.000192345	0.0131069	TRUE	UP	YDL131W_mRNA
PIS1	70.4841	1.71528	0.331339	5.1768	2.25719e-07	8.30878e-05	TRUE	UP	YPR113W		POM33	17.3508	1.82653	0.509719	3.58341	0.000339132	0.0206136	TRUE	UP	YLL023C_mRNA
ACT1	398.417	1.70879	0.516826	3.30632	0.000945315	0.0472476	TRUE	UP	YFL039C		EMG1	50.3811	1.77328	0.357415	4.96142	6.99788e-07	0.00013631	TRUE	UP	YLR186W_mRNA
YHM2	23.5644	1.6932	0.500293	3.38442	0.000713281	0.0403003	TRUE	UP	YMR241W		HOC1	28.291	1.75813	0.411355	4.27399	1.92006e-05	0.00208152	TRUE	UP	YJR075W_mRNA
RTN2	38.2677	1.68678	0.411123	4.10286	4.08074e-05	0.00451178	TRUE	UP	YDL204W		PRE5	24.0375	1.75702	0.435959	4.03025	5.57174e-05	0.005111	TRUE	UP	YMR314W_mRNA
NA.1	55.5374	1.64372	0.364729	4.50668	6.58483e-06	0.0010067	TRUE	UP	YJR085C		SFT2	54.7507	1.73883	0.326123	5.33182	9.72328e-08	3.86501e-05	TRUE	UP	YBL102W_mRNA
SFT2	50.4884	1.61949	0.320876	5.04709	4.48596e-07	0.000105991	TRUE	UP	YBL102W		PIS1	70.3577	1.7291	0.33204	5.20751	1.91389e-07	5.0718e-05	TRUE	UP	YPR113W_mRNA
MET3	21.1812	1.56595	0.451905	3.46522	0.000529793	0.0321724	TRUE	UP	YJR010W		YHM2	23.167	1.72012	0.501718	3.42845	0.000607034	0.0321728	TRUE	UP	YMR241W_mRNA
NA.2	34.8672	1.56522	0.432039	3.62286	0.000291359	0.0210345	TRUE	UP	YNL190W		RTN2	38.5544	1.69237	0.408681	4.14106	3.45711e-05	0.00329808	TRUE	UP	YDL204W_mRNA
CCT5	40.6455	1.5499	0.352097	4.40191	1.07303e-05	0.0014678	TRUE	UP	YJR064W		NA.1	33.8775	1.68649	0.430708	3.91562	9.01739e-05	0.00712993	TRUE	UP	YNL190W_mRNA
AKR1	25.4545	1.50596	0.422595	3.5636	0.000365799	0.0256949	TRUE	UP	YDR264C		CCT5	40.9018	1.52876	0.349886	4.36931	1.24642e-05	0.00148635	TRUE	UP	YJR064W_mRNA
COR1	54.2814	1.46302	0.384214	3.80783	0.000140191	0.0134947	TRUE	UP	YBL045C		MET3	21.2984	1.5196	0.446425	3.40393	0.000664228	0.033706	TRUE	UP	YJR010W_mRNA
ARC40	36.4342	1.37422	0.34656	3.9653	7.33041e-05	0.00762069	TRUE	UP	YBR234C		BOL1	20.6139	1.48771	0.4488	3.31486	0.000916879	0.0404955	TRUE	UP	YAL044W-A_mRNA
PDX3	73.5229	1.29961	0.281569	4.61558	3.91991e-06	0.00063674	TRUE	UP	YBR035C		COR1	53.112	1.48221	0.387624	3.82384	0.000131388	0.00949577	TRUE	UP	YBL045C_mRNA
HTZ1	43.2979	1.29545	0.352639	3.6736	0.000239154	0.0186757	TRUE	UP	YOL012C		CDC1	26.023	1.40749	0.411472	3.42062	0.000624792	0.0323941	TRUE	UP	YDR182W_mRNA
SML1	121.32	1.29523	0.261764	4.9481	7.49404e-07	0.000162308	TRUE	UP	YML058W		CPA1	23.3778	1.40558	0.430603	3.26422	0.00109767	0.0447531	TRUE	UP	YOR303W_mRNA
RPT6	46.7331	1.28322	0.341102	3.76198	0.000168571	0.0155924	TRUE	UP	YGL048C		AKR1	25.4633	1.40481	0.41466	3.38787	0.000704366	0.0347171	TRUE	UP	YDR264C_mRNA
SGT2	135.099	1.27584	0.259286	4.9206	8.62779e-07	0.000172489	TRUE	UP	YOR007C		HTZ1	42.8375	1.3867	0.354743	3.90901	9.26742e-05	0.00712993	TRUE	UP	YOL012C_mRNA
PRP43	37.8239	1.27174	0.338763	3.75408	0.000173982	0.0155924	TRUE	UP	YGL120C		ARC40	36.7198	1.35409	0.343204	3.94545	7.96511e-05	0.00678457	TRUE	UP	YBR234C_mRNA
PDC1	192.009	1.26409	0.26864	4.70552	2.53225e-06	0.000438754	TRUE	UP	YLR044C		PDX3	73.8313	1.30035	0.279724	4.64868	3.34063e-06	0.000468671	TRUE	UP	YBR035C_mRNA
ADE16	57.6935	1.26155	0.341782	3.69108	0.000223305	0.0186757	TRUE	UP	YLR028C		SML1	120.048	1.29977	0.262072	4.95958	7.06453e-07	0.00013631	TRUE	UP	YML058W_mRNA
SEH1	36.4675	1.24687	0.369513	3.37438	0.000739834	0.0409113	TRUE	UP	YGL100W		RPT6	47.6621	1.26735	0.334616	3.78749	0.00015218	0.010675	TRUE	UP	YGL048C_mRNA
ZEO1	992.792	1.24474	0.188889	6.58978	4.40466e-11	2.86193e-08	TRUE	UP	YOL109W		SGT2	137.566	1.25221	0.252983	4.94978	7.42991e-07	0.00013631	TRUE	UP	YOR007C_mRNA
HSP26	120.333	1.07806	0.251692	4.28324	1.84191e-05	0.00234054	TRUE	UP	YBR072W		ADE16	57.974	1.2455	0.339713	3.66634	0.000246047	0.0163006	TRUE	UP	YLR028C_mRNA
APE4	43.7862	1.06579	0.319082	3.34017	0.000837274	0.0444097	TRUE	UP	YHR113W		SEH1	37.1573	1.20264	0.368706	3.26179	0.0011071	0.0447531	TRUE	UP	YGL100W_mRNA
UBC4	140.004	1.04325	0.234091	4.45659	8.32745e-06	0.00120239	TRUE	UP	YBR082C		ZEO1	1011.72	1.19325	0.190396	6.26722	3.67557e-10	1.75325e-07	TRUE	UP	YOL109W_mRNA
RPS15	962.23	1.00248	0.187752	5.33936	9.32737e-08	4.04031e-05	TRUE	UP	YOL040C		PRP43	38.656	1.18859	0.332158	3.57839	0.000345721	0.0206136	TRUE	UP	YGL120C_mRNA
PDB1	197.015	0.995881	0.259775	3.83363	0.000126266	0.0126218	TRUE	UP	YBR221C		TUB3	41.2295	1.15049	0.355922	3.23242	0.00122746	0.0487915	TRUE	UP	YML124C_mRNA
CDC48	144.821	0.955432	0.223912	4.267	1.98122e-05	0.00234054	TRUE	UP	YDL126C		VMA4	199.678	1.13833	0.290377	3.92018	8.84818e-05	0.00712993	TRUE	UP	YOR332W_mRNA
RPL23A	866.47	0.915255	0.249509	3.66823	0.000244237	0.0186757	TRUE	UP	YBL087C		HSP26	121.707	1.06097	0.25366	4.18263	2.88151e-05	0.002988	TRUE	UP	YBR072W_mRNA
ARC15	80.6167	0.905613	0.27005	3.3535	0.000797964	0.0432064	TRUE	UP	YIL062C		UBC4	142.147	1.04095	0.231117	4.50402	6.66797e-06	0.000837005	TRUE	UP	YBR082C_mRNA
RPL19A	666.609	0.854588	0.165829	5.15344	2.55753e-07	8.30878e-05	TRUE	UP	YBR084C-A		APE4	44.4585	1.03951	0.314565	3.3046	0.000951125	0.0412443	TRUE	UP	YHR113W_mRNA
RPS12	1675.3	0.831602	0.164712	5.04881	4.44565e-07	0.000105991	TRUE	UP	YOR369C		PDB1	197.882	1.00498	0.261972	3.83623	0.000124938	0.0093118	TRUE	UP	YBR221C_mRNA
APA1	106.17	0.776521	0.237083	3.27531	0.00105547	0.0498756	TRUE	UP	YCL050C		RPS15	973.47	0.993922	0.188084	5.28447	1.2607e-07	4.29537e-05	TRUE	UP	YOL040C_mRNA
TOM6	95.719	0.766591	0.232777	3.29325	0.000990371	0.0476662	TRUE	UP	YOR045W		CDC48	145.932	0.935101	0.224158	4.17161	3.02457e-05	0.00300567	TRUE	UP	YDL126C_mRNA
KRS1	324.668	0.746441	0.215488	3.46396	0.000532286	0.0321724	TRUE	UP	YDR037W		RPL23A	875.036	0.903439	0.24961	3.61941	0.000295279	0.0190335	TRUE	UP	YBL087C_mRNA
NA.3	395.172	-0.633817	0.179801	-3.52511	0.000423307	0.0275044	TRUE	DOWN	SCR1		ARC15	82.2289	0.902289	0.2666	3.38443	0.000713265	0.0347171	TRUE	UP	YIL062C_mRNA
15S_RRNA	1239.38	-0.653293	0.190223	-3.43436	0.000593962	0.0350842	TRUE	DOWN	Q0020		RPL8B	304.682	0.895878	0.224382	3.99265	6.53395e-05	0.00577166	TRUE	UP	YLL045C_mRNA
RPS7A	394.557	-0.658313	0.18662	-3.52755	0.000419417	0.0275044	TRUE	DOWN	YOR096W		RPL19A	673.256	0.843758	0.167408	5.04013	4.65215e-07	0.000110954	TRUE	UP	YBR084C-A_mRNA
RPL9A	228.547	-0.678987	0.204953	-3.31289	0.000923367	0.0470555	TRUE	DOWN	YGL147C		RPS12	1704.76	0.809777	0.165213	4.9014	9.51567e-07	0.000162106	TRUE	UP	YOR369C_mRNA
TMA10	451.793	-0.693374	0.1624	-4.26954	1.95878e-05	0.00234054	TRUE	DOWN	YLR327C		NA.2	1824.47	0.772	0.220632	3.49904	0.000466928	0.0258982	TRUE	UP	YDR366C_mRNA
RPL40B	149.593	-0.702703	0.202678	-3.46708	0.000526139	0.0321724	TRUE	DOWN	YKR094C		TOM6	95.9226	0.761676	0.233428	3.26301	0.00110236	0.0447531	TRUE	UP	YOR045W_mRNA
HXT2	32.4172	-1.25628	0.380797	-3.29909	0.000969989	0.0475661	TRUE	DOWN	YMR011W		KRS1	327.165	0.742587	0.215957	3.4386	0.000584741	0.0316956	TRUE	UP	YDR037W_mRNA
											RPS7A	401.44	-0.661835	0.188374	-3.5134	0.000442406	0.0251223	TRUE	DOWN	YOR096W_mRNA
											RPL40B	151.318	-0.682029	0.20402	-3.34295	0.000828914	0.0392287	TRUE	DOWN	YKR094C_mRNA
											TMA10	455.912	-0.707754	0.165422	-4.27849	1.88168e-05	0.00208152	TRUE	DOWN	YLR327C_mRNA
											HXT6	69.5367	-0.911354	0.273559	-3.33147	0.000863893	0.0392287	TRUE	DOWN	YDR343C_mRNA
											HXT2	32.8789	-1.25446	0.376835	-3.32895	0.000871748	0.0392287	TRUE	DOWN	YMR011W_mRNA
24 hour post-sequencing initiation											24 hour post-sequencing initiation
gene name	gene base mean	log 2 fold change	lfcSE	stat	p-value	p-adjusted	significance	significance_reg	gene ID		transcript name	transcript base mean	log 2 fold change	lfcSE	stat	p-value	p-adjusted	significance	significance_reg	gene ID
JLP2	1530.86	6.51715	0.237728	27.4143	1.85383e-165	4.92563e-162	TRUE	UP	YMR132C		JLP2	1615.33	5.90993	0.223604	26.4303	6.14185e-154	1.63926e-150	TRUE	UP	YMR132C_mRNA
RPL15A	1571.97	2.12486	0.205206	10.3548	3.98131e-25	5.28917e-22	TRUE	UP	YLR029C		SHM1	89.0788	2.54415	0.349462	7.28019	3.33343e-13	2.96564e-10	TRUE	UP	YBR263W_mRNA
ARD1	45.3291	2.09301	0.38979	5.36957	7.89261e-08	2.33008e-05	TRUE	UP	YHR013C		BNA5	35.8758	2.18252	0.405797	5.37834	7.51746e-08	2.00641e-05	TRUE	UP	YLR231C_mRNA
SHM1	17.0214	1.99652	0.504551	3.95703	7.58877e-05	0.00630105	TRUE	UP	YBR263W		RPL15A	1602.14	2.08282	0.203555	10.2322	1.42213e-24	1.89784e-21	TRUE	UP	YLR029C_mRNA
MSY1	17.651	1.92053	0.490392	3.91631	8.99135e-05	0.0072394	TRUE	UP	YPL097W		ARD1	46.3861	2.05932	0.379933	5.42024	5.95205e-08	1.76511e-05	TRUE	UP	YHR013C_mRNA
ERG2	182.194	1.91055	0.258305	7.3965	1.39824e-13	1.23837e-10	TRUE	UP	YMR202W		MSY1	18.7412	1.86877	0.471686	3.96189	7.43589e-05	0.0056704	TRUE	UP	YPL097W_mRNA
GPM3	15.5137	1.74939	0.515686	3.39236	0.00069294	0.0312058	TRUE	UP	YOL056W		DOA1	25.7786	1.78003	0.468966	3.79566	0.000147252	0.00873367	TRUE	UP	YKL213C_mRNA
DOA1	25.1607	1.74623	0.476363	3.66576	0.000246604	0.0136505	TRUE	UP	YKL213C		ERG2	189.534	1.77794	0.249978	7.1124	1.14038e-12	7.60921e-10	TRUE	UP	YMR202W_mRNA
RPL13A	492.469	1.7377	0.540539	3.21475	0.00130557	0.046877	TRUE	UP	YDL082W		LYS21	49.1764	1.71546	0.369561	4.64188	3.45259e-06	0.000542057	TRUE	UP	YDL131W_mRNA
LYS21	47.4927	1.72902	0.379725	4.55334	5.28001e-06	0.000701449	TRUE	UP	YDL131W		RPL13A	500.797	1.70251	0.534191	3.18708	0.00143719	0.0491777	TRUE	UP	YDL082W_mRNA
THI6	14.9279	1.72386	0.525112	3.28284	0.00102766	0.0407536	TRUE	UP	YPL214C		NA.1	95.5933	1.66849	0.5032	3.31576	0.000913958	0.0358729	TRUE	UP	YJR085C_mRNA
NA.1	95.0379	1.69272	0.525427	3.2216	0.00127478	0.0465974	TRUE	UP	YJR085C		FTH1	31.0059	1.66727	0.405573	4.11091	3.94105e-05	0.00339311	TRUE	UP	YBR207W_mRNA
FTH1	30.5469	1.69101	0.423974	3.98849	6.64963e-05	0.00588935	TRUE	UP	YBR207W		PIS1	139.296	1.64937	0.264354	6.23927	4.39626e-10	2.34672e-07	TRUE	UP	YPR113W_mRNA
PIS1	136.69	1.68512	0.272449	6.18508	6.20702e-10	4.12301e-07	TRUE	UP	YPR113W		EMG1	89.3019	1.63247	0.298455	5.46975	4.50659e-08	1.50351e-05	TRUE	UP	YLR186W_mRNA
EMG1	88.2319	1.67712	0.305875	5.48302	4.18136e-08	1.38874e-05	TRUE	UP	YLR186W		SDH5	69.692	1.61348	0.320235	5.03843	4.69376e-07	9.63665e-05	TRUE	UP	YOL071W_mRNA
PRE5	47.5213	1.67612	0.32739	5.11963	3.06129e-07	6.77821e-05	TRUE	UP	YMR314W		PRE5	49.8057	1.54147	0.314164	4.90658	9.26788e-07	0.000176685	TRUE	UP	YMR314W_mRNA
SIT1	15.6647	1.6312	0.500674	3.25801	0.00112196	0.0432035	TRUE	UP	YEL065W		YHM2	45.5045	1.49765	0.405377	3.69445	0.000220363	0.0115323	TRUE	UP	YMR241W_mRNA
YHM2	45.4297	1.52488	0.412094	3.70031	0.000215336	0.012438	TRUE	UP	YMR241W		SIT1	18.9893	1.45511	0.444541	3.27328	0.00106306	0.0402296	TRUE	UP	YEL065W_mRNA
HOC1	36.3717	1.50489	0.341528	4.40634	1.05131e-05	0.00121449	TRUE	UP	YJR075W		HTZ1	75.4212	1.44817	0.29938	4.83721	1.31671e-06	0.000219644	TRUE	UP	YOL012C_mRNA
CDC1	31.2564	1.50283	0.398286	3.77323	0.000161144	0.0103075	TRUE	UP	YDR182W		TYW1	28.7178	1.44512	0.376861	3.83462	0.000125758	0.007999	TRUE	UP	YPL207W_mRNA
POM33	27.5397	1.50053	0.413977	3.62467	0.000289332	0.0156889	TRUE	UP	YLL023C		RTN2	67.3142	1.44213	0.326648	4.41495	1.01034e-05	0.00117243	TRUE	UP	YDL204W_mRNA
TYW1	28.2199	1.46749	0.386949	3.79246	0.000149164	0.00997077	TRUE	UP	YPL207W		POM33	27.8606	1.4243	0.404157	3.52413	0.000424882	0.0202502	TRUE	UP	YLL023C_mRNA
POB3	26.9637	1.46081	0.394409	3.70379	0.000212402	0.012438	TRUE	UP	YML069W		SFT2	102.066	1.39662	0.253685	5.50534	3.68462e-08	1.40489e-05	TRUE	UP	YBL102W_mRNA
RTN2	67.2143	1.4311	0.32595	4.39056	1.13059e-05	0.00125166	TRUE	UP	YDL204W		CPA1	40.7069	1.39486	0.3564	3.91376	9.08691e-05	0.00655485	TRUE	UP	YOR303W_mRNA
SEC65	33.5191	1.42856	0.423823	3.37064	0.000749943	0.0326656	TRUE	UP	YML105C		POB3	27.7137	1.33949	0.377466	3.54864	0.000387231	0.0187913	TRUE	UP	YML069W_mRNA
SFT2	91.9168	1.42122	0.257353	5.52247	3.34262e-08	1.26876e-05	TRUE	UP	YBL102W		SEC9	21.4016	1.31443	0.411817	3.19177	0.00141402	0.0491777	TRUE	UP	YGR009C_mRNA
HTZ1	75.5375	1.39371	0.298549	4.66828	3.03732e-06	0.000474715	TRUE	UP	YOL012C		HOC1	53.3555	1.31373	0.293093	4.48231	7.38409e-06	0.000895824	TRUE	UP	YJR075W_mRNA
ARC40	71.2358	1.34844	0.280975	4.79913	1.59358e-06	0.000302438	TRUE	UP	YBR234C		SEH1	64.8696	1.31094	0.314218	4.17209	3.01822e-05	0.00298357	TRUE	UP	YGL100W_mRNA
SEH1	63.7263	1.34575	0.314509	4.2789	1.8782e-05	0.00191938	TRUE	UP	YGL100W		LSP1	74.7455	1.2703	0.34538	3.67796	0.000235104	0.0120672	TRUE	UP	YPL004C_mRNA
CCT5	73.3975	1.28974	0.288033	4.47775	7.54348e-06	0.00095443	TRUE	UP	YJR064W		ARC40	72.803	1.2577	0.27498	4.57381	4.78937e-06	0.000608707	TRUE	UP	YBR234C_mRNA
LSP1	73.5288	1.26069	0.350853	3.59322	0.000326614	0.017016	TRUE	UP	YPL004C		GLE2	38.7505	1.25308	0.362085	3.46074	0.000538701	0.0243694	TRUE	UP	YER107C_mRNA
PDC1	343.921	1.2498	0.262041	4.76949	1.84692e-06	0.00032715	TRUE	UP	YLR044C		CDC1	49.8224	1.24853	0.332552	3.75438	0.000173774	0.00966258	TRUE	UP	YDR182W_mRNA
UBC9	43.8569	1.23569	0.329628	3.74875	0.000177715	0.0108705	TRUE	UP	YDL064W		CCT5	74.4097	1.23605	0.282688	4.3725	1.22832e-05	0.00131136	TRUE	UP	YJR064W_mRNA
SML1	226.048	1.21829	0.229056	5.31875	1.04482e-07	2.77608e-05	TRUE	UP	YML058W		BOL1	37.702	1.23072	0.331648	3.71091	0.000206516	0.0110238	TRUE	UP	YAL044W-A_mRNA
GAL80	39.8506	1.21602	0.345662	3.51794	0.000434914	0.0213994	TRUE	UP	YML051W		SML1	224.822	1.217	0.227613	5.34678	8.9533e-08	2.1724e-05	TRUE	UP	YML058W_mRNA
ADE16	107.738	1.18717	0.284894	4.16705	3.08564e-05	0.0030365	TRUE	UP	YLR028C		UBC9	46.2757	1.20924	0.317856	3.80438	0.000142159	0.00862323	TRUE	UP	YDL064W_mRNA
RBG2	47.2388	1.18412	0.34584	3.42389	0.000617318	0.0282795	TRUE	UP	YGR173W		GAL80	40.4599	1.18339	0.338786	3.49303	0.00047757	0.0219764	TRUE	UP	YML051W_mRNA
AKR1	50.812	1.16032	0.315055	3.68289	0.000230602	0.0130364	TRUE	UP	YDR264C		ADE16	108.967	1.18088	0.284473	4.15114	3.30826e-05	0.00315348	TRUE	UP	YLR028C_mRNA
ZEO1	1781.67	1.14824	0.188603	6.0881	1.14256e-09	6.07156e-07	TRUE	UP	YOL109W		RBG2	47.862	1.15542	0.338569	3.41266	0.000643313	0.0276936	TRUE	UP	YGR173W_mRNA
PRP43	76.3348	1.12913	0.260266	4.33836	1.43548e-05	0.00152563	TRUE	UP	YGL120C		TPD3	85.0829	1.15235	0.268922	4.28506	1.8269e-05	0.00187538	TRUE	UP	YAL016W_mRNA
FPR2	57.8563	1.11841	0.312019	3.58443	0.000337819	0.0172612	TRUE	UP	YDR519W		SSD1	43.1529	1.14843	0.34691	3.31044	0.000931493	0.0360312	TRUE	UP	YDR293C_mRNA
SSD1	44.9458	1.11166	0.338194	3.28704	0.00101247	0.0407536	TRUE	UP	YDR293C		AKR1	51.5085	1.10195	0.310093	3.55362	0.000379962	0.01878	TRUE	UP	YDR264C_mRNA
ADD37	51.1423	1.06039	0.298707	3.54993	0.000385329	0.0193174	TRUE	UP	YMR184W		ZEO1	1821.67	1.09233	0.187643	5.82131	5.83896e-09	2.59736e-06	TRUE	UP	YOL109W_mRNA
APE4	80.039	1.03652	0.274903	3.77048	0.000162935	0.0103075	TRUE	UP	YHR113W		FPR2	70.886	1.07767	0.284975	3.78162	0.000155809	0.00897293	TRUE	UP	YDR519W_mRNA
PDX3	128.4	1.03537	0.261325	3.96202	7.43177e-05	0.00630105	TRUE	UP	YBR035C		PRP43	77.7344	1.0619	0.256937	4.13292	3.5819e-05	0.0031867	TRUE	UP	YGL120C_mRNA
TUB3	76.2086	1.0334	0.272209	3.79636	0.000146839	0.00997077	TRUE	UP	YML124C		APE4	81.0302	1.03662	0.269278	3.84964	0.000118293	0.00789307	TRUE	UP	YHR113W_mRNA
RPT6	86.7116	1.03244	0.270029	3.82346	0.000131592	0.00997077	TRUE	UP	YGL048C		PDX3	131.221	1.03183	0.256762	4.01862	5.85403e-05	0.00473467	TRUE	UP	YBR035C_mRNA
SGT2	248.196	1.02997	0.224798	4.58176	4.61075e-06	0.000644777	TRUE	UP	YOR007C		SGT2	251.972	1.01876	0.222287	4.58308	4.58186e-06	0.000608707	TRUE	UP	YOR007C_mRNA
RPS15	1710.32	1.02555	0.196891	5.20874	1.90124e-07	4.59236e-05	TRUE	UP	YOL040C		RPS15	1737.69	1.00888	0.193547	5.21257	1.86238e-07	4.14223e-05	TRUE	UP	YOL040C_mRNA
MAK21	56.4091	1.00413	0.297583	3.37428	0.000740087	0.0326656	TRUE	UP	YDR060W		RPT6	88.464	1.00398	0.265734	3.77813	0.00015801	0.00897293	TRUE	UP	YGL048C_mRNA
HSP26	227.588	0.985753	0.220695	4.46658	7.94794e-06	0.000959895	TRUE	UP	YBR072W		TUB3	76.6753	0.994451	0.265983	3.73877	0.000184922	0.0100726	TRUE	UP	YML124C_mRNA
UBC4	255.293	0.976549	0.21012	4.64759	3.3584e-06	0.000495738	TRUE	UP	YBR082C		ADD37	52.5938	0.992503	0.293085	3.3864	0.000708154	0.030001	TRUE	UP	YMR184W_mRNA
ARC15	140.066	0.924134	0.224441	4.11749	3.8302e-05	0.00363458	TRUE	UP	YIL062C		HSP26	230.878	0.975496	0.221674	4.40059	1.07957e-05	0.00120058	TRUE	UP	YBR072W_mRNA
APA1	185.532	0.877397	0.217323	4.03729	5.40732e-05	0.00495422	TRUE	UP	YCL050C		UBC4	260.287	0.955556	0.207086	4.6143	3.94416e-06	0.000554051	TRUE	UP	YBR082C_mRNA
TPO3	75.6542	0.876934	0.265882	3.29821	0.000973027	0.0406082	TRUE	UP	YPR156C		MAK21	58.0931	0.922132	0.289109	3.18957	0.00142487	0.0491777	TRUE	UP	YDR060W_mRNA
RPL23A	1514.31	0.861093	0.247465	3.47966	0.000502054	0.0238207	TRUE	UP	YBL087C		ARC15	145.654	0.89998	0.217629	4.13539	3.54353e-05	0.0031867	TRUE	UP	YIL062C_mRNA
CDC48	263.292	0.845335	0.222189	3.80457	0.000142051	0.00997077	TRUE	UP	YDL126C		TPO3	74.5687	0.885073	0.261956	3.3787	0.000728282	0.0303717	TRUE	UP	YPR156C_mRNA
PDB1	357.122	0.840958	0.256907	3.27339	0.00106266	0.0415217	TRUE	UP	YBR221C		PDB1	359.109	0.844082	0.258387	3.26674	0.00108795	0.0403298	TRUE	UP	YBR221C_mRNA
MNN5	126.254	0.813421	0.251407	3.23548	0.00121439	0.046095	TRUE	UP	YJL186W		RPL23A	1543.42	0.838521	0.243046	3.45005	0.000560489	0.0249324	TRUE	UP	YBL087C_mRNA
GLR1	143.599	0.803129	0.22905	3.50635	0.000454296	0.0219466	TRUE	UP	YPL091W		APA1	187.942	0.836514	0.212554	3.93554	8.30105e-05	0.00615431	TRUE	UP	YCL050C_mRNA
RPL19A	1193.96	0.795789	0.161581	4.92502	8.43523e-07	0.000172403	TRUE	UP	YBR084C-A		CDC48	266.898	0.832647	0.217152	3.83439	0.000125874	0.007999	TRUE	UP	YDL126C_mRNA
RPS12	3051.76	0.76312	0.161187	4.73437	2.19733e-06	0.000364894	TRUE	UP	YOR369C		MNN5	127.613	0.80609	0.249997	3.22439	0.00126241	0.0461557	TRUE	UP	YJL186W_mRNA
KRS1	595.619	0.725973	0.211852	3.42678	0.000610775	0.0282795	TRUE	UP	YDR037W		GLR1	146.345	0.797446	0.227204	3.50982	0.000448411	0.0209966	TRUE	UP	YPL091W_mRNA
PRE2	248.51	0.681785	0.2114	3.2251	0.00125929	0.0465974	TRUE	UP	YPR103W		RPL8B	563.372	0.774517	0.189568	4.0857	4.39433e-05	0.00366515	TRUE	UP	YLL045C_mRNA
TOM6	165.673	0.637511	0.199368	3.19766	0.00138549	0.0488309	TRUE	UP	YOR045W		RPL19A	1215.63	0.772424	0.159484	4.84327	1.27718e-06	0.000219644	TRUE	UP	YBR084C-A_mRNA
ELO1	286.003	0.609681	0.184934	3.29674	0.000978142	0.0406082	TRUE	UP	YJL196C		RPS12	3131.95	0.730418	0.157809	4.62849	3.68345e-06	0.000546174	TRUE	UP	YOR369C_mRNA
RPL20B	474.29	-0.579753	0.174902	-3.31474	0.000917297	0.0393106	TRUE	DOWN	YOR312C		KRS1	602.25	0.716176	0.208503	3.43485	0.00059289	0.0259413	TRUE	UP	YDR037W_mRNA
TMA10	797.71	-0.607586	0.160275	-3.79089	0.000150106	0.00997077	TRUE	DOWN	YLR327C		PRE2	252.493	0.662883	0.207843	3.18934	0.00142597	0.0491777	TRUE	UP	YPR103W_mRNA
RPS28A	413.681	-0.60864	0.185162	-3.28706	0.00101239	0.0407536	TRUE	DOWN	YOR167C		ELO1	292.149	0.589268	0.183783	3.20633	0.0013444	0.0484894	TRUE	UP	YJL196C_mRNA
15S_RRNA	2301.4	-0.639333	0.198528	-3.22037	0.00128025	0.0465974	TRUE	DOWN	Q0020		RPL20B	488.306	-0.576434	0.172725	-3.3373	0.000845979	0.0338923	TRUE	DOWN	YOR312C_mRNA
RPS7A	797.251	-0.644107	0.171967	-3.74553	0.000180015	0.0108705	TRUE	DOWN	YOR096W		TMA10	801.194	-0.620246	0.160753	-3.85837	0.000114146	0.00789307	TRUE	DOWN	YLR327C_mRNA
RPL40B	308.705	-0.65102	0.180938	-3.59803	0.000320641	0.017016	TRUE	DOWN	YKR094C		RPS28A	417.874	-0.622583	0.186642	-3.33572	0.000850801	0.0338923	TRUE	DOWN	YOR167C_mRNA
RPS22A	414.037	-0.744957	0.196124	-3.7984	0.000145632	0.00997077	TRUE	DOWN	YJL190C		RPL40B	311.539	-0.647627	0.179605	-3.60584	0.000311139	0.0156685	TRUE	DOWN	YKR094C_mRNA
RPS24B	123.345	-0.779566	0.243971	-3.19532	0.00139674	0.0488309	TRUE	DOWN	YIL069C		RPS7A	816.623	-0.658495	0.17099	-3.85108	0.000117599	0.00789307	TRUE	DOWN	YOR096W_mRNA
HXT2	64.7726	-1.16893	0.302709	-3.86156	0.000112665	0.00880444	TRUE	DOWN	YMR011W		RPS22A	422.376	-0.749346	0.196726	-3.80909	0.00013948	0.00862323	TRUE	DOWN	YJL190C_mRNA
NA.2	23.3473	-1.35933	0.425984	-3.19104	0.0014176	0.0489166	TRUE	DOWN	snR82		RPS24B	126.654	-0.766804	0.240884	-3.18329	0.0014561	0.0491939	TRUE	DOWN	YIL069C_mRNA
											HXT6	132.308	-0.782282	0.239128	-3.2714	0.00107018	0.0402296	TRUE	DOWN	YDR343C_mRNA
											HXT2	66.5576	-1.18165	0.29627	-3.98843	6.65123e-05	0.00522121	TRUE	DOWN	YMR011W_mRNA

## Sheet: Rkr1Δ_jlp2Δ_pJvsRkr1Δ_jlp2Δ_pEV
Differentially expressed genes (left) and transcripts (right) in rkr1Δ jlp2Δ-pJlp2(URA3) vs rkr1Δjlp2Δ-pEV(URA3), per each time point. Data was collected 1-hour, 2-hours, 5hours, 10-hours and 24-hours post-sequencing initiation. The same time points for DEGs and DETs are shown in the same row.
Differential Gene expression											Differential Transcript expression
1 hour post-sequencing initiation											1 hour post-sequencing initiation
gene name	gene base mean	log 2 fold change	lfcSE	stat	p-value	p-adjusted	significance	significance_reg	gene ID		transcript name	transcript base mean	log 2 fold change	lfcSE	stat	p-value	p-adjusted	significance	significance_reg	gene ID
JLP2	118.372	8.09457	0.878182	9.21742	3.04337e-20	1.50038e-16	TRUE	UP	YMR132C		JLP2	123.28	8.16393	0.873952	9.3414	9.50731e-21	5.01415e-17	TRUE	UP	YMR132C_mRNA
2 hour post-sequencing initiation											2 hour post-sequencing initiation
gene name	gene base mean	log 2 fold change	lfcSE	stat	p-value	p-adjusted	significance	significance_reg	gene ID		transcript name	transcript base mean	log 2 fold change	lfcSE	stat	p-value	p-adjusted	significance	significance_reg	gene ID
JLP2	267.205	7.68807	0.547961	14.0303	1.01683e-44	5.7268e-41	TRUE	UP	YMR132C		JLP2	277.409	7.59129	0.515574	14.724	4.52415e-49	2.65115e-45	TRUE	UP	YMR132C_mRNA
5 hour post-sequencing initiation											5 hour post-sequencing initiation
gene name	gene base mean	log 2 fold change	lfcSE	stat	p-value	p-adjusted	significance	significance_reg	gene ID		transcript name	transcript base mean	log 2 fold change	lfcSE	stat	p-value	p-adjusted	significance	significance_reg	gene ID
JLP2	584.347	7.98004	0.408566	19.5318	5.89195e-85	3.5281e-81	TRUE	UP	YMR132C		JLP2	618.756	7.53937	0.356246	21.1634	2.0778e-99	1.27681e-95	TRUE	UP	YMR132C_mRNA
CCW12	1929.57	-0.806215	0.182512	-4.41732	9.99325e-06	0.0299198	TRUE	DOWN	YLR110C		CCW12	1941.73	-0.787587	0.179569	-4.38599	1.15461e-05	0.0354755	TRUE	DOWN	YLR110C_mRNA
10 hour post-sequencing initiation											10 hour post-sequencing initiation
gene name	gene base mean	log 2 fold change	lfcSE	stat	p-value	p-adjusted	significance	significance_reg	gene ID		transcript name	transcript base mean	log 2 fold change	lfcSE	stat	p-value	p-adjusted	significance	significance_reg	gene ID
JLP2	1051.91	8.07267	0.338625	23.8395	1.30001e-125	8.00025e-122	TRUE	UP	YMR132C		JLP2	1122.63	7.3954	0.281368	26.2838	2.93914e-152	1.84225e-148	TRUE	UP	YMR132C_mRNA
											OPI11	588.527	-0.916494	0.207134	-4.42464	9.66053e-06	0.0302761	TRUE	DOWN	YPR044C_mRNA
											CCW12	3562.17	-0.781878	0.180615	-4.32898	1.49802e-05	0.0312987	TRUE	DOWN	YLR110C_mRNA
											SED1	422.184	-0.846962	0.200496	-4.22433	2.39652e-05	0.0375534	TRUE	DOWN	YDR077W_mRNA
24 hour post-sequencing initiation											24 hour post-sequencing initiation
gene name	gene base mean	log 2 fold change	lfcSE	stat	p-value	p-adjusted	significance	significance_reg	gene ID		transcript name	transcript base mean	log 2 fold change	lfcSE	stat	p-value	p-adjusted	significance	significance_reg	gene ID
JLP2	2047.75	7.44163	0.236533	31.4613	2.94275e-217	1.40664e-214	TRUE	UP	YMR132C		JLP2	2187.86	6.7503	0.200444	33.6768	1.26478e-248	1.35205e-245	TRUE	UP	YMR132C_mRNA
SED1	747.574	-0.855174	0.176949	-4.83288	1.34575e-06	0.000214422	TRUE	DOWN	YDR077W		MET3	105.296	0.756487	0.224738	3.36608	0.000762453	0.0451894	TRUE	UP	YJR010W_mRNA
CCW12	6095.96	-0.786666	0.17648	-4.45754	8.2904e-06	0.000990702	TRUE	DOWN	YLR110C		TDH1	638.103	0.715504	0.182627	3.91784	8.93471e-05	0.0117891	TRUE	UP	YJL052W_mRNA
ARG1	192.339	-0.790736	0.198017	-3.99326	6.51699e-05	0.00623024	TRUE	DOWN	YOL058W		RPS14B	591.527	0.517132	0.144379	3.58176	0.000341288	0.0260598	TRUE	UP	YJL191W_mRNA
ILV5	836.124	-0.660159	0.171354	-3.8526	0.000116872	0.00931077	TRUE	DOWN	YLR355C		RPP2A	3664.18	-0.432038	0.127228	-3.39577	0.000684366	0.0430346	TRUE	DOWN	YOL039W_mRNA
GCV3	261.025	-0.683942	0.18091	-3.78056	0.000156476	0.0106851	TRUE	DOWN	YAL044C		HSC82	709.364	-0.554754	0.158876	-3.49174	0.000479883	0.0341996	TRUE	DOWN	YMR186W_mRNA
NA.1	5189.31	0.771666	0.207189	3.72445	0.000195743	0.0116956	TRUE	DOWN	NME1		ILV5	842.662	-0.64386	0.159122	-4.04634	5.20244e-05	0.00794486	TRUE	DOWN	YLR355C_mRNA
SCW4	220.231	-1.09202	0.297025	-3.67653	0.00023643	0.0125571	TRUE	DOWN	YGR279C		RPL9B	178.677	-0.648708	0.193546	-3.3517	0.000803179	0.0451894	TRUE	DOWN	YNL067W_mRNA
STI1	288.433	-0.733024	0.201264	-3.64209	0.00027043	0.0129266	TRUE	DOWN	YOR027W		SIS1	318.826	-0.65986	0.180732	-3.65104	0.000261176	0.0214767	TRUE	DOWN	YNL007C_mRNA
TDH1	621.605	0.700771	0.194067	3.61097	0.000305058	0.0132562	TRUE	DOWN	YJL052W		GCV3	271.175	-0.660752	0.169754	-3.89241	9.92532e-05	0.0117891	TRUE	DOWN	YAL044C_mRNA
SIS1	310.896	-0.674291	0.188046	-3.58578	0.000336067	0.0133867	TRUE	DOWN	YNL007C		STI1	291.33	-0.714032	0.18852	-3.78756	0.000152135	0.0135527	TRUE	DOWN	YOR027W_mRNA
RPL9B	176.501	-0.704533	0.204124	-3.4515	0.000557486	0.0204983	TRUE	DOWN	YNL067W		CCW12	6218.05	-0.764436	0.163762	-4.66796	3.04211e-06	0.000813003	TRUE	DOWN	YLR110C_mRNA
HSC82	687.58	-0.563777	0.172029	-3.27721	0.00104838	0.0357946	TRUE	DOWN	YMR186W		RPS28B	266.394	-0.770361	0.174692	-4.40982	1.03457e-05	0.0022119	TRUE	DOWN	YLR264W_mRNA
RPS14B	589.839	0.503079	0.156617	3.21216	0.00131741	0.0419816	TRUE	DOWN	YJL191W		ARG1	195.607	-0.780542	0.187074	-4.17238	3.0144e-05	0.00537065	TRUE	DOWN	YOL058W_mRNA
RPP2A	3632.42	-0.446221	0.139896	-3.18966	0.00142441	0.0425543	TRUE	DOWN	YOL039W		SED1	754.609	-0.836236	0.16565	-5.0482	4.45994e-07	0.000225713	TRUE	DOWN	YDR077W_mRNA
											OPI11	1034.36	-0.937372	0.188199	-4.98074	6.33431e-07	0.000225713	TRUE	DOWN	YPR044C_mRNA
											RPL43A	88.4243	-0.937506	0.246834	-3.79812	0.000145799	0.0135527	TRUE	DOWN	YPR043W_mRNA
											NUP2	61.2855	-0.961333	0.278046	-3.45746	0.000545292	0.0364323	TRUE	DOWN	YLR335W_mRNA
											GLY1	90.0601	-0.984758	0.258679	-3.80688	0.000140732	0.0135527	TRUE	DOWN	YEL046C_mRNA

## Sheet: Rkr1Δ_pEV_vs_wt_pEV
Differentially expressed genes (left) and transcripts (right) in rkr1Δ-pEV(URA3) vs WT-pEV(HIS3), per each time point. Data was collected 1-hour, 2-hours, 5hours, 10-hours and 24-hours post-sequencing initiation. The same time points for DEGs and DETs are shown in the same row.
Differential Gene expression											Differential Transcript expression
1 hour post-sequencing initiation											1 hour post-sequencing initiation
gene name	gene base mean	log 2 fold change	lfcSE	stat	p-value	p-adjusted	significance	significance_reg	gene ID		transcript name	transcript base mean	log 2 fold change	lfcSE	stat	p-value	p-adjusted	significance	significance_reg	gene ID
HygR	23.2281	7.95137	1.27188	6.25168	4.06073e-10	6.07756e-08	TRUE	UP	HygR		HygR	22.7752	7.92659	1.22702	6.46005	1.04666e-10	1.68064e-08	TRUE	UP	HygR
URA3	33.8115	6.61819	1.10011	6.01592	1.78873e-09	2.00784e-07	TRUE	UP	YEL021W		URA3	33.473	6.60226	1.06025	6.22709	4.75168e-10	5.34089e-08	TRUE	UP	YEL021W_mRNA
AIM17	4.89708	5.69476	1.479	3.8504	0.000117924	0.00165462	TRUE	UP	YHL021C		AIM17	4.7794	5.65238	1.31196	4.30836	1.64473e-05	0.000410816	TRUE	UP	YHL021C_mRNA
TMA10	17.2275	5.63555	1.14017	4.94274	7.70318e-07	2.56495e-05	TRUE	UP	YLR327C		RPT1	4.65948	5.62985	1.31661	4.27602	1.90268e-05	0.000455023	TRUE	UP	YKL145W_mRNA
HXT7	8.99367	5.58149	1.35165	4.12938	3.63741e-05	0.000859577	TRUE	UP	YDR342C		TMA10	16.8434	5.60418	1.08335	5.173	2.30369e-07	1.17698e-05	TRUE	UP	YLR327C_mRNA
EMI2	7.89522	5.39701	1.37986	3.91129	9.18058e-05	0.00147217	TRUE	UP	YDR516C		HXT7	7.99714	5.40475	1.27499	4.23905	2.24471e-05	0.00051491	TRUE	UP	YDR342C_mRNA
HSP42	5.56328	4.87864	1.43705	3.39489	0.000686552	0.00636514	TRUE	UP	YDR171W		RME1	3.89388	5.37184	1.33348	4.02843	5.61507e-05	0.00108126	TRUE	UP	YGR044C_mRNA
RTC3	10.2244	4.85002	1.19585	4.05569	4.9986e-05	0.00104652	TRUE	UP	YHR087W		EMI2	7.70449	5.35881	1.28128	4.18239	2.8846e-05	0.000635744	TRUE	UP	YDR516C_mRNA
TFS1	7.38894	4.36588	1.24375	3.51027	0.000447656	0.00456812	TRUE	UP	YLR178C		DDR2	3.82192	5.35449	1.35261	3.95865	7.53752e-05	0.00130341	TRUE	UP	YOL052C-A_mRNA
GLC8	5.78617	3.9667	1.30772	3.03329	0.00241906	0.0157414	TRUE	UP	YMR311C		TFS1	7.04224	5.22196	1.28005	4.07951	4.5131e-05	0.000920166	TRUE	UP	YLR178C_mRNA
MSC1	8.29204	3.95277	1.10289	3.58402	0.000338344	0.00370528	TRUE	UP	YML128C		HXT6	3.34676	5.16605	1.36234	3.79205	0.000149411	0.00233247	TRUE	UP	YDR343C_mRNA
NA.2	7.43512	3.78922	1.10608	3.42583	0.000612935	0.00611573	TRUE	UP	YER062C		MRPL13	2.97494	4.98756	1.39748	3.56898	0.000358377	0.00473901	TRUE	UP	YKR006C_mRNA
TDH1	29.8309	3.7635	0.580998	6.47765	9.31608e-11	2.09146e-08	TRUE	UP	YJL052W		HSP42	5.44025	4.84465	1.29837	3.73133	0.000190475	0.00289316	TRUE	UP	YDR171W_mRNA
HSP82	4.98685	3.72798	1.34014	2.78178	0.00540615	0.0299674	TRUE	UP	YPL240C		RTC3	9.98252	4.82084	1.11529	4.3225	1.54268e-05	0.000394086	TRUE	UP	YHR087W_mRNA
ALD6	11.5441	3.64344	0.914254	3.98515	6.74373e-05	0.00121117	TRUE	UP	YPL061W		NA.4	2.4184	4.67894	1.45558	3.21448	0.00130683	0.0123435	TRUE	UP	YLR177W_mRNA
RPN11	6.38459	3.52211	1.16295	3.0286	0.00245692	0.0157594	TRUE	UP	YFR004W		SAC6	2.40252	4.67064	1.47728	3.16165	0.0015688	0.0142204	TRUE	UP	YDR129C_mRNA
HSP12	87.7491	3.35904	0.371528	9.04117	1.55004e-19	6.95966e-17	TRUE	UP	YFL014W		CRH1	2.16781	4.51462	1.51599	2.978	0.00290132	0.0222613	TRUE	UP	YGR189C_mRNA
NA.6	5.36338	3.28556	1.23841	2.65304	0.00797694	0.0381026	TRUE	UP	YLR257W		MRPL10	2.0881	4.47377	1.52236	2.9387	0.00329592	0.024056	TRUE	UP	YNL284C_mRNA
PRE2	6.96446	3.2225	1.02377	3.14769	0.00164565	0.0120064	TRUE	UP	YPR103W		TPO4	2.04825	4.4527	1.53346	2.90369	0.00368798	0.025908	TRUE	UP	YOR273C_mRNA
YET3	8.47102	3.17169	0.934275	3.39481	0.000686757	0.00636514	TRUE	UP	YDL072C		PMT1	2.04658	4.42629	1.55338	2.84946	0.00437933	0.0289551	TRUE	UP	YDL095W_mRNA
MIA40	5.17403	3.16051	1.19685	2.64068	0.00827388	0.0386976	TRUE	UP	YKL195W		RFA2	4.0926	4.42021	1.32685	3.33136	0.000864226	0.00916406	TRUE	UP	YNL312W_mRNA
INH1	11.6365	3.11967	0.799534	3.90186	9.54552e-05	0.00147791	TRUE	UP	YDL181W		YAP1	1.97498	4.38382	1.56719	2.79725	0.00515396	0.0327291	TRUE	UP	YML007W_mRNA
SED1	18.019	2.9982	0.740345	4.04973	5.1277e-05	0.00104652	TRUE	UP	YDR077W		HXT4	1.96687	4.38206	1.55546	2.81722	0.00484418	0.0312923	TRUE	UP	YHR092C_mRNA
PRC1	10.9084	2.99267	0.841328	3.55708	0.000375006	0.00400899	TRUE	UP	YMR297W		GLK1	10.1145	4.25543	0.950761	4.47582	7.6119e-06	0.000231237	TRUE	UP	YCL040W_mRNA
TMA17	5.69387	2.88627	1.11148	2.59679	0.00941006	0.0426779	TRUE	UP	YDL110C		HSP30	3.3586	4.09236	1.3665	2.99478	0.0027464	0.0212893	TRUE	UP	YCR021C_mRNA
PNC1	5.62313	2.88509	1.08721	2.65366	0.00796242	0.0381026	TRUE	UP	YGL037C		NA.10	3.06206	3.97072	1.4011	2.83401	0.0045968	0.0300396	TRUE	UP	YGR161W-C_mRNA
PUP3	5.39062	2.8425	1.12794	2.52008	0.0117327	0.049053	TRUE	UP	YER094C		NA.9	3.03302	3.95589	1.38407	2.85815	0.00426123	0.0285097	TRUE	UP	YDL124W_mRNA
TIM11	12.8071	2.69906	0.725937	3.71803	0.000200783	0.00243652	TRUE	UP	YDR322C-A		MSC1	8.10437	3.92187	0.982041	3.99359	6.50795e-05	0.00119917	TRUE	UP	YML128C_mRNA
ERG10	8.77772	2.65911	0.853558	3.11532	0.00183744	0.0125002	TRUE	UP	YPL028W		GLC8	5.5027	3.91045	1.15685	3.38026	0.000724177	0.00805916	TRUE	UP	YMR311C_mRNA
SDH4	6.71476	2.50123	0.959675	2.60633	0.00915192	0.0419307	TRUE	UP	YDR178W		HSP26	2.74945	3.86182	1.43391	2.69322	0.00707659	0.0425352	TRUE	UP	YBR072W_mRNA
ADH3	8.82659	2.42917	0.832575	2.91766	0.00352673	0.0216918	TRUE	UP	YMR083W		HXK1	5.05048	3.8179	1.18632	3.21826	0.00128969	0.0123435	TRUE	UP	YFR053C_mRNA
KRE2	8.83434	2.42182	0.844581	2.86748	0.00413755	0.0241268	TRUE	UP	YDR483W		NA.11	2.65864	3.77685	1.42504	2.65035	0.00804083	0.0474403	TRUE	UP	YJR015W_mRNA
CIT2	16.5411	2.41916	0.664109	3.64272	0.00026977	0.00302817	TRUE	UP	YCR005C		YNK1	2.62655	3.76699	1.43426	2.62644	0.00862834	0.0499236	TRUE	UP	YKL067W_mRNA
SOD1	8.04207	2.27262	0.843645	2.69381	0.00706398	0.0368805	TRUE	UP	YJR104C		RCR1	2.70612	3.76647	1.42159	2.64948	0.00806148	0.0474403	TRUE	UP	YBR005W_mRNA
EFT1	17.5984	2.26543	0.597479	3.79164	0.000149656	0.00194333	TRUE	UP	YOR133W		GPP2	7.26722	3.74728	0.975753	3.8404	0.000122833	0.00197234	TRUE	UP	YER062C_mRNA
PHB2	7.69124	2.23126	0.867048	2.5734	0.0100706	0.0438998	TRUE	UP	YGR231C		HSP82	4.88065	3.71136	1.16543	3.18455	0.00144978	0.013357	TRUE	UP	YPL240C_mRNA
YRB1	37.1776	2.17452	0.440734	4.93386	8.06204e-07	2.56495e-05	TRUE	UP	YDR002W		TDH1	28.8703	3.70771	0.508045	7.298	2.92086e-13	1.09435e-10	TRUE	UP	YJL052W_mRNA
TPM1	31.6754	2.17111	0.458915	4.73096	2.23459e-06	5.57407e-05	TRUE	UP	YNL079C		ALD6	11.281	3.6224	0.808514	4.48032	7.4531e-06	0.000231237	TRUE	UP	YPL061W_mRNA
PDA1	11.5502	2.04684	0.738008	2.77346	0.0055463	0.0303694	TRUE	UP	YER178W		PRE2	6.65883	3.59981	0.97711	3.68414	0.000229479	0.00343913	TRUE	UP	YPR103W_mRNA
PST2	11.6515	1.97458	0.69258	2.85106	0.00435744	0.0250832	TRUE	UP	YDR032C		RPN11	6.2362	3.48741	0.993304	3.51092	0.000446553	0.00555517	TRUE	UP	YFR004W_mRNA
15S_RRNA	72.4446	1.91492	0.40316	4.74979	2.03632e-06	5.37827e-05	TRUE	UP	Q0020		STF2	4.05695	3.45116	1.19881	2.87882	0.00399161	0.027525	TRUE	UP	YGR008C_mRNA
CWP1	11.6582	1.89095	0.730618	2.58815	0.0096492	0.042896	TRUE	UP	YKL096W		COX5A	3.91625	3.42808	1.20166	2.85277	0.00433394	0.0288246	TRUE	UP	YNL052W_mRNA
SAH1	25.9339	1.80393	0.483524	3.73079	0.000190882	0.00238072	TRUE	UP	YER043C		ARC35	3.78392	3.32775	1.20521	2.76113	0.00576023	0.0359694	TRUE	UP	YNR035C_mRNA
TPI1	92.0283	1.77874	0.305357	5.82513	5.70677e-09	3.66048e-07	TRUE	UP	YDR050C		HSP12	87.3603	3.27931	0.322921	10.1551	3.14362e-24	3.53343e-21	TRUE	UP	YFL014W_mRNA
SDD2	11.7803	1.75984	0.687196	2.5609	0.0104402	0.0450735	TRUE	UP	YMR074C		VMA1	3.47774	3.22964	1.23027	2.62515	0.00866112	0.0499236	TRUE	UP	YDL185W_mRNA
HOR7	83.6914	1.65525	0.337991	4.89732	9.7155e-07	2.72641e-05	TRUE	UP	YMR251W-A		CDC19	33.3711	3.22945	0.669409	4.82434	1.40469e-06	5.7963e-05	TRUE	UP	YAL038W_mRNA
CWP2	200.798	1.57861	0.269217	5.86372	4.52598e-09	3.66048e-07	TRUE	UP	YKL096W-A		NA.6	5.08547	3.165	1.03997	3.04337	0.00233946	0.0189176	TRUE	UP	YLR257W_mRNA
RPL2B	112.433	1.52028	0.413868	3.67334	0.000239401	0.00275618	TRUE	UP	YIL018W		NA.1	1345.29	3.14777	0.533968	5.89505	3.74558e-09	2.80669e-07	TRUE	UP	YLR154W-A_mRNA
TEF2	93.5783	1.50503	0.376535	3.99707	6.41324e-05	0.00119981	TRUE	UP	YBR118W		MIA40	5.0777	3.1254	1.01294	3.08548	0.00203223	0.0170465	TRUE	UP	YKL195W_mRNA
EFT2	29.8177	1.44657	0.448818	3.22306	0.00126831	0.00981844	TRUE	UP	YDR385W		YET3	8.2944	3.12299	0.807272	3.86858	0.000109472	0.00180951	TRUE	UP	YDL072C_mRNA
GLN1	20.3047	1.39874	0.520781	2.68585	0.00723461	0.0373373	TRUE	UP	YPR035W		INH1	11.3942	3.08752	0.69101	4.46813	7.89069e-06	0.000233398	TRUE	UP	YDL181W_mRNA
YEF3	22.9193	1.31864	0.503416	2.61939	0.00880878	0.0407746	TRUE	UP	YLR249W		PRC1	10.6842	2.96265	0.709975	4.1729	3.00749e-05	0.000650081	TRUE	UP	YMR297W_mRNA
TEF1	93.0051	1.31631	0.334733	3.93244	8.40896e-05	0.00139838	TRUE	UP	YPR080W		SED1	17.6041	2.95672	0.869115	3.40199	0.000668967	0.00775174	TRUE	UP	YDR077W_mRNA
21S_RRNA	647.395	1.24977	0.246687	5.06621	4.05815e-07	1.82211e-05	TRUE	UP	Q0158		NA.2	19.6509	2.86377	0.514222	5.56913	2.56014e-08	1.4388e-06	TRUE	UP	YLR154W-F_mRNA
NA.3	76.5157	1.16332	0.342992	3.39169	0.000694637	0.00636514	TRUE	UP	ETS1-1		TMA17	5.58739	2.8629	0.921478	3.10686	0.00189087	0.016224	TRUE	UP	YDL110C_mRNA
FPR1	34.0936	1.0972	0.43246	2.53711	0.0111772	0.0477957	TRUE	UP	YNL135C		IDH1	5.54773	2.84333	0.915936	3.10429	0.00190734	0.0162413	TRUE	UP	YNL037C_mRNA
NA.4	73.099	1.05822	0.335442	3.15469	0.00160669	0.0120064	TRUE	UP	ETS1-2		PUP1	4.08219	2.83706	1.06816	2.65603	0.00790666	0.0470216	TRUE	UP	YOR157C_mRNA
TSA1	82.0302	0.998197	0.305931	3.26282	0.00110309	0.00869558	TRUE	UP	YML028W		PUP3	5.27415	2.79767	0.927378	3.01675	0.00255503	0.0202243	TRUE	UP	YER094C_mRNA
OLI1	490.612	0.871455	0.267103	3.26262	0.00110389	0.00869558	TRUE	UP	Q0130		ZRT1	3.91658	2.74459	1.04145	2.63535	0.00840502	0.0489494	TRUE	UP	YGL255W_mRNA
RPS31	185.065	-0.751322	0.265821	-2.82642	0.00470718	0.0264191	TRUE	DOWN	YLR167W		TIM11	12.6292	2.67672	0.615877	4.34619	1.38523e-05	0.000370715	TRUE	UP	YDR322C-A_mRNA
RPP1B	160.111	-0.774652	0.259694	-2.98294	0.00285497	0.0180546	TRUE	DOWN	YDL130W		ERG10	8.60472	2.61892	0.722605	3.62428	0.000289771	0.00403744	TRUE	UP	YPL028W_mRNA
RPP1A	159.811	-0.787864	0.273044	-2.88548	0.00390818	0.023397	TRUE	DOWN	YDL081C		MDH1	5.88233	2.60703	0.863268	3.01995	0.00252815	0.020165	TRUE	UP	YKL085W_mRNA
RPS25B	48.8302	-0.948883	0.376873	-2.51778	0.0118098	0.049053	TRUE	DOWN	YLR333C		PNC1	5.67485	2.51696	0.845826	2.97575	0.00292274	0.0222613	TRUE	UP	YGL037C_mRNA
RPL41B	269.219	-0.950828	0.24688	-3.85138	0.000117453	0.00165462	TRUE	DOWN	YDL133C-A		PRE7	5.79546	2.50961	0.843605	2.97486	0.0029312	0.0222613	TRUE	UP	YBL041W_mRNA
RPL35A	48.1593	-0.986761	0.369701	-2.66908	0.00760589	0.037528	TRUE	DOWN	YDL191W		ALD4	5.52034	2.47683	0.850467	2.91231	0.00358762	0.0254726	TRUE	UP	YOR374W_mRNA
RPS18B	45.7378	-0.995534	0.372178	-2.67488	0.00747549	0.037528	TRUE	DOWN	YML026C		CYT1	5.50025	2.45068	0.856345	2.86179	0.00421257	0.0283528	TRUE	UP	YOR065W_mRNA
RPL4A	72.4902	-1.00465	0.321047	-3.12931	0.00175219	0.0124878	TRUE	DOWN	YBR031W		SDH4	6.58365	2.44718	0.791462	3.09198	0.00198829	0.0168033	TRUE	UP	YDR178W_mRNA
RPL34A	37.4834	-1.00769	0.398317	-2.52986	0.0114108	0.0483344	TRUE	DOWN	YER056C-A		CIT2	16.7912	2.44539	0.533704	4.58192	4.60727e-06	0.000165179	TRUE	UP	YCR005C_mRNA
RPL27A	76.9602	-1.00941	0.332599	-3.03493	0.00240592	0.0157414	TRUE	DOWN	YHR010W		KTR1	5.5182	2.43178	0.846106	2.87408	0.00405203	0.0275298	TRUE	UP	YOR099W_mRNA
RPS26A	47.0634	-1.02865	0.389444	-2.64132	0.00825827	0.0386976	TRUE	DOWN	YGL189C		ADH3	8.63104	2.39718	0.702478	3.41247	0.000643777	0.00753755	TRUE	UP	YMR083W_mRNA
RPL13B	49.7467	-1.05011	0.383948	-2.73502	0.00623759	0.0337431	TRUE	DOWN	YMR142C		KRE2	8.65095	2.39333	0.705048	3.39455	0.000687402	0.00783564	TRUE	UP	YDR483W_mRNA
RPS24A	93.9483	-1.05717	0.312947	-3.37811	0.000729852	0.00655407	TRUE	DOWN	YER074W		ORM2	5.33312	2.37666	0.8484	2.80134	0.00508909	0.0325008	TRUE	UP	YLR350W_mRNA
RPL31A	53.4959	-1.06141	0.349169	-3.03982	0.0023672	0.0157414	TRUE	DOWN	YDL075W		PHB2	7.24604	2.35153	0.741706	3.17044	0.0015221	0.0139093	TRUE	UP	YGR231C_mRNA
RPL20B	54.1819	-1.12586	0.360941	-3.11923	0.00181326	0.0125002	TRUE	DOWN	YOR312C		RPL10	107.683	2.33109	0.26386	8.83456	1.00489e-18	5.64746e-16	TRUE	UP	YLR075W_mRNA
RPL33B	38.4292	-1.13877	0.417082	-2.73032	0.0063273	0.0338209	TRUE	DOWN	YOR234C		SBH2	10.0811	2.28451	0.64938	3.51798	0.000434842	0.0055365	TRUE	UP	YER019C-A_mRNA
TRX1	22.6684	-1.21804	0.484338	-2.51485	0.0119082	0.049053	TRUE	DOWN	YLR043C		YRB1	36.7234	2.14889	0.35653	6.02724	1.66779e-09	1.442e-07	TRUE	UP	YDR002W_mRNA
RPS7A	92.2094	-1.30246	0.336386	-3.87193	0.000107978	0.00161607	TRUE	DOWN	YOR096W		ELO1	6.17156	2.1043	0.786698	2.67486	0.00747613	0.0446977	TRUE	UP	YJL196C_mRNA
RPL26A	24.8009	-1.30711	0.487476	-2.68138	0.00733194	0.0374096	TRUE	DOWN	YLR344W		TPM1	31.3592	2.09597	0.369568	5.6714	1.41632e-08	8.84416e-07	TRUE	UP	YNL079C_mRNA
RPS25A	24.465	-1.32054	0.509549	-2.59158	0.0095536	0.0428957	TRUE	DOWN	YGR027C		EFT1	18.3496	2.06654	0.468543	4.41057	1.03097e-05	0.000289704	TRUE	UP	YOR133W_mRNA
RPL6B	24.3095	-1.33795	0.494901	-2.70347	0.00686205	0.0362477	TRUE	DOWN	YLR448W		QCR6	6.91518	2.05679	0.733783	2.80299	0.00506312	0.0325008	TRUE	UP	YFR033C_mRNA
RPS13	62.7711	-1.38015	0.342466	-4.03005	5.5765e-05	0.00108863	TRUE	DOWN	YDR064W		PDA1	11.3256	2.02669	0.60949	3.32523	0.000883456	0.00928042	TRUE	UP	YER178W_mRNA
RPS20	39.8846	-1.38958	0.423115	-3.28416	0.00102288	0.00863091	TRUE	DOWN	YHL015W		PST2	11.277	1.9168	0.57782	3.31729	0.000908941	0.00929279	TRUE	UP	YDR032C_mRNA
RPL37A	49.803	-1.41178	0.413278	-3.41605	0.000635367	0.00620173	TRUE	DOWN	YLR185W		CWP1	11.4419	1.85019	0.592595	3.12219	0.00179512	0.0156412	TRUE	UP	YKL096W_mRNA
ILV5	23.4162	-1.48907	0.560871	-2.65493	0.0079325	0.0381026	TRUE	DOWN	YLR355C		SAH1	25.5677	1.7749	0.389521	4.55662	5.19834e-06	0.000177059	TRUE	UP	YER043C_mRNA
RPS19A	31.3263	-1.49339	0.478224	-3.12278	0.00179153	0.0125002	TRUE	DOWN	YOL121C		GND1	8.15419	1.75458	0.651269	2.6941	0.00705797	0.0425352	TRUE	UP	YHR183W_mRNA
RPS22A	47.9167	-1.52834	0.398665	-3.83363	0.000126265	0.00171797	TRUE	DOWN	YJL190C		MBF1	27.4758	1.72464	0.398891	4.3236	1.53505e-05	0.000394086	TRUE	UP	YOR298C-A_mRNA
RPL20A	16.8664	-1.56044	0.584229	-2.67094	0.00756385	0.037528	TRUE	DOWN	YMR242C		TPI1	90.7508	1.72014	0.25505	6.74433	1.53734e-11	2.87994e-09	TRUE	UP	YDR050C_mRNA
RPL25	37.5015	-1.62345	0.439274	-3.69576	0.000219229	0.00259036	TRUE	DOWN	YOL127W		SDD2	11.5709	1.71935	0.560941	3.06512	0.00217585	0.0179816	TRUE	UP	YMR074C_mRNA
RPL34B	24.889	-1.65722	0.501954	-3.30153	0.000961578	0.00846566	TRUE	DOWN	YIL052C		HOR7	80.6403	1.67997	0.286829	5.85703	4.71204e-09	3.11549e-07	TRUE	UP	YMR251W-A_mRNA
RPS10A	37.7428	-1.66983	0.422004	-3.9569	7.59289e-05	0.00131123	TRUE	DOWN	YOR293W		MEO1	24.1668	1.64157	0.406287	4.04041	5.33572e-05	0.00105217	TRUE	UP	YBR126W-A_mRNA
RPS28A	61.4517	-1.77353	0.356275	-4.97798	6.425e-07	2.56495e-05	TRUE	DOWN	YOR167C		PDC1	14.6432	1.63379	0.500881	3.26183	0.00110696	0.0110108	TRUE	UP	YLR044C_mRNA
GSP1	14.8987	-1.7758	0.689224	-2.57652	0.00998003	0.0438998	TRUE	DOWN	YLR293C		KRS1	11.0093	1.61668	0.562391	2.87465	0.00404474	0.0275298	TRUE	UP	YDR037W_mRNA
RPL11B	18.5088	-1.79334	0.562756	-3.18671	0.00143899	0.0109509	TRUE	DOWN	YGR085C		RPS2	84.1208	1.60974	0.265463	6.06388	1.32876e-09	1.2446e-07	TRUE	UP	YGL123W_mRNA
RPL36A	14.0271	-1.82491	0.641341	-2.84545	0.00443485	0.0252057	TRUE	DOWN	YMR194W		AI1	15.7499	1.5554	0.485834	3.2015	0.00136713	0.0126996	TRUE	UP	Q0050_mRNA
NA.5	15.9613	-1.85968	0.641917	-2.89706	0.00376673	0.0228549	TRUE	DOWN	YIL053W		NHP6B	11.2111	1.53031	0.554065	2.76198	0.00574529	0.0359694	TRUE	UP	YBR089C-A_mRNA
RPL29	21.3615	-2.00163	0.565888	-3.53714	0.000404485	0.00422357	TRUE	DOWN	YFR032C-A		SOD1	91.0482	1.50077	0.274415	5.46897	4.52649e-08	2.42275e-06	TRUE	UP	YJR104C_mRNA
RPS10B	23.8089	-2.00583	0.529435	-3.78862	0.000151485	0.00194333	TRUE	DOWN	YMR230W		CWP2	220.608	1.49121	0.253951	5.87203	4.30495e-09	3.02423e-07	TRUE	UP	YKL096W-A_mRNA
RPS27B	51.4083	-2.03521	0.41202	-4.93959	7.8289e-07	2.56495e-05	TRUE	DOWN	YHR021C		EFT2	28.179	1.47113	0.365415	4.0259	5.67568e-05	0.00108126	TRUE	UP	YDR385W_mRNA
NHP2	11.1418	-2.06563	0.702696	-2.93958	0.00328654	0.0204952	TRUE	DOWN	YDL208W		YPT1	14.6667	1.44083	0.487702	2.95433	0.00313349	0.0233248	TRUE	UP	YFL038C_mRNA
ARG1	16.3107	-2.36965	0.721776	-3.28309	0.00102678	0.00863091	TRUE	DOWN	YOL058W		TEF2	93.0195	1.42547	0.321934	4.42783	9.51859e-06	0.000274331	TRUE	UP	YBR118W_mRNA
RPL40B	49.475	-2.3946	0.409387	-5.84923	4.93842e-09	3.66048e-07	TRUE	DOWN	YKR094C		GLN1	19.7982	1.40802	0.420034	3.35215	0.000801853	0.00866618	TRUE	UP	YPR035W_mRNA
RPS29B	11.6198	-2.40932	0.734544	-3.28001	0.00103802	0.00863091	TRUE	DOWN	YDL061C		TEF1	90.4776	1.32147	0.288679	4.57764	4.70261e-06	0.000165179	TRUE	UP	YPR080W_mRNA
BAT1	7.67112	-2.55237	0.887581	-2.87565	0.00403193	0.0238202	TRUE	DOWN	YHR208W		YEF3	22.9192	1.30832	0.391767	3.33953	0.000839188	0.00898331	TRUE	UP	YLR249W_mRNA
RPS30B	9.00477	-2.59841	0.826067	-3.14552	0.00165789	0.0120064	TRUE	DOWN	YOR182C		NA.3	76.3745	1.14763	0.279127	4.11152	3.93064e-05	0.000833592	TRUE	UP	YDR366C_mRNA
RPS11A	16.1162	-2.6479	0.652242	-4.05969	4.9138e-05	0.00104652	TRUE	DOWN	YDR025W		RPL12B	153.66	1.10491	0.30603	3.61048	0.000305636	0.00413898	TRUE	UP	YDR418W_mRNA
ALD5	7.10882	-3.3451	1.02158	-3.27443	0.00105875	0.00864325	TRUE	DOWN	YER073W		RPL8A	20.2706	1.08853	0.41177	2.64354	0.00820441	0.04803	TRUE	UP	YHL033C_mRNA
LEU1	15.3985	-3.72245	0.756297	-4.92194	8.56887e-07	2.56495e-05	TRUE	DOWN	YGL009C		FPR1	33.6714	1.03951	0.344235	3.01978	0.00252959	0.020165	TRUE	UP	YNL135C_mRNA
NA.1	489.31	-4.89721	0.890698	-5.49817	3.83761e-08	1.91454e-06	TRUE	DOWN	SCR1		NA.5	33.4519	1.02676	0.33508	3.06423	0.00218233	0.0179816	TRUE	UP	YHR054W-A_mRNA
											NA.7	31.6755	1.01909	0.342858	2.97233	0.00295546	0.0222949	TRUE	UP	YNL208W_mRNA
											PGK1	126.822	0.971856	0.266407	3.64802	0.000264271	0.00378143	TRUE	UP	YCR012W_mRNA
											TSA1	81.0204	0.952293	0.250939	3.79492	0.00014769	0.00233247	TRUE	UP	YML028W_mRNA
											OLI1	523.926	0.83083	0.302999	2.74203	0.00610613	0.0379187	TRUE	DOWN	Q0130_mRNA
											RPL30	52.2813	-0.767697	0.283214	-2.71066	0.00671496	0.041098	TRUE	DOWN	YGL030W_mRNA
											RPL40A	66.6105	-0.778642	0.265749	-2.92999	0.00338975	0.0244236	TRUE	DOWN	YIL148W_mRNA
											RPS31	183.911	-0.787772	0.241808	-3.25784	0.00112263	0.0110687	TRUE	DOWN	YLR167W_mRNA
											RPS18A	50.86	-0.805564	0.29059	-2.77216	0.00556851	0.0351629	TRUE	DOWN	YDR450W_mRNA
											RPP1B	159.243	-0.816773	0.232313	-3.51583	0.000438388	0.0055365	TRUE	DOWN	YDL130W_mRNA
											RPP1A	158.514	-0.823196	0.244547	-3.36621	0.000762082	0.00839785	TRUE	DOWN	YDL081C_mRNA
											RPS19B	43.975	-0.830637	0.289117	-2.87301	0.00406578	0.0275298	TRUE	DOWN	YNL302C_mRNA
											RPS21B	61.2021	-0.849848	0.2891	-2.93963	0.00328603	0.024056	TRUE	DOWN	YJL136C_mRNA
											RPL18A	51.1521	-0.85433	0.293489	-2.91095	0.00360333	0.0254726	TRUE	DOWN	YOL120C_mRNA
											RPL37B	36.0519	-0.871523	0.322194	-2.70496	0.00683119	0.0415041	TRUE	DOWN	YDR500C_mRNA
											RPS6A	40.7953	-0.874679	0.322757	-2.71003	0.00672779	0.041098	TRUE	DOWN	YPL090C_mRNA
											TMA19	54.8775	-0.875006	0.272185	-3.21474	0.00130562	0.0123435	TRUE	DOWN	YKL056C_mRNA
											RPS16B	36.3112	-0.900833	0.309135	-2.91405	0.00356775	0.0254726	TRUE	DOWN	YDL083C_mRNA
											RPL6A	54.806	-0.917501	0.28375	-3.23348	0.00122291	0.0118495	TRUE	DOWN	YML073C_mRNA
											RPS1B	48.2187	-0.953699	0.306811	-3.10842	0.00188089	0.016224	TRUE	DOWN	YML063W_mRNA
											RPL22A	47.4521	-0.996286	0.311017	-3.20332	0.00135853	0.0126996	TRUE	DOWN	YLR061W_mRNA
											RPS18B	44.0333	-0.997611	0.294915	-3.38271	0.00071775	0.00805916	TRUE	DOWN	YML026C_mRNA
											RPS25B	48.7527	-1.00171	0.298623	-3.35445	0.00079524	0.00866618	TRUE	DOWN	YLR333C_mRNA
											RPL35A	48.5476	-1.00669	0.288298	-3.49185	0.000479692	0.00579756	TRUE	DOWN	YDL191W_mRNA
											RPL41B	229.416	-1.02213	0.24346	-4.19838	2.68836e-05	0.000604342	TRUE	DOWN	YDL133C-A_mRNA
											RPL4A	71.7894	-1.03345	0.25969	-3.97955	6.90463e-05	0.0012342	TRUE	DOWN	YBR031W_mRNA
											RPL27A	76.4311	-1.05167	0.272463	-3.85986	0.00011345	0.00184809	TRUE	DOWN	YHR010W_mRNA
											RPS26A	47.1837	-1.06391	0.308439	-3.44935	0.000561929	0.00671924	TRUE	DOWN	YGL189C_mRNA
											RPS24A	93.1388	-1.06989	0.262493	-4.07586	4.58446e-05	0.000920166	TRUE	DOWN	YER074W_mRNA
											RPL1A	25.7424	-1.08861	0.383052	-2.84195	0.00448389	0.0294731	TRUE	DOWN	YPL220W_mRNA
											RPL34A	36.5477	-1.10084	0.314075	-3.50502	0.000456566	0.00557804	TRUE	DOWN	YER056C-A_mRNA
											RPS21A	29.479	-1.10873	0.353073	-3.14022	0.0016882	0.0148245	TRUE	DOWN	YKR057W_mRNA
											RPL31A	52.9873	-1.11257	0.277834	-4.00445	6.2161e-05	0.00116448	TRUE	DOWN	YDL075W_mRNA
											RPL13B	49.5525	-1.11466	0.307643	-3.62322	0.000290954	0.00403744	TRUE	DOWN	YMR142C_mRNA
											RPL20B	54.1242	-1.1783	0.288504	-4.08419	4.42307e-05	0.000920166	TRUE	DOWN	YOR312C_mRNA
											RPL12A	26.6732	-1.18473	0.376245	-3.14883	0.00163928	0.014651	TRUE	DOWN	YEL054C_mRNA
											SPO24	19.8886	-1.18525	0.434016	-2.73089	0.00631636	0.0390088	TRUE	DOWN	YPR036W-A_mRNA
											TRX1	22.5458	-1.2032	0.382459	-3.14596	0.00165541	0.014651	TRUE	DOWN	YLR043C_mRNA
											RPL33B	37.9768	-1.23085	0.327273	-3.76093	0.000169284	0.00260651	TRUE	DOWN	YOR234C_mRNA
											RPS27A	28.3495	-1.25289	0.349327	-3.58658	0.000335043	0.00448319	TRUE	DOWN	YKL156W_mRNA
											OPI11	46.5506	-1.27005	0.322213	-3.94166	8.09186e-05	0.00137807	TRUE	DOWN	YPR044C_mRNA
											RPL6B	22.6693	-1.28362	0.39527	-3.24746	0.00116442	0.0113809	TRUE	DOWN	YLR448W_mRNA
											RPL33A	20.541	-1.28791	0.436406	-2.95116	0.00316583	0.0234105	TRUE	DOWN	YPL143W_mRNA
											RPS25A	24.5837	-1.30893	0.394898	-3.31461	0.000917704	0.00929279	TRUE	DOWN	YGR027C_mRNA
											RPS7A	91.7646	-1.32513	0.285042	-4.64889	3.33722e-06	0.000125035	TRUE	DOWN	YOR096W_mRNA
											RPL26A	25.0981	-1.3462	0.38021	-3.54067	0.000399112	0.00515634	TRUE	DOWN	YLR344W_mRNA
											RPL36A	24.1651	-1.37669	0.37753	-3.64656	0.000265777	0.00378143	TRUE	DOWN	YMR194W_mRNA
											RPL17A	17.2312	-1.38248	0.467433	-2.9576	0.00310046	0.0232328	TRUE	DOWN	YKL180W_mRNA
											ILV5	22.0575	-1.40135	0.445222	-3.14754	0.0016465	0.014651	TRUE	DOWN	YLR355C_mRNA
											RPS13	63.2232	-1.40774	0.276544	-5.09046	3.57195e-07	1.74559e-05	TRUE	DOWN	YDR064W_mRNA
											RPL37A	49.2677	-1.44139	0.335044	-4.30208	1.692e-05	0.000413436	TRUE	DOWN	YLR185W_mRNA
											RPS20	39.7109	-1.46227	0.333644	-4.38272	1.17204e-05	0.000321312	TRUE	DOWN	YHL015W_mRNA
											VMA10	14.7208	-1.46863	0.479483	-3.06294	0.00219171	0.0179816	TRUE	DOWN	YHR039C-A_mRNA
											RPS24B	13.3258	-1.48075	0.505101	-2.9316	0.00337225	0.0244236	TRUE	DOWN	YIL069C_mRNA
											RPS19A	30.9295	-1.51735	0.381453	-3.97782	6.95489e-05	0.0012342	TRUE	DOWN	YOL121C_mRNA
											RPL20A	16.9654	-1.54974	0.46742	-3.31552	0.000914741	0.00929279	TRUE	DOWN	YMR242C_mRNA
											RPS22A	47.5958	-1.55962	0.320022	-4.87349	1.09644e-06	4.74e-05	TRUE	DOWN	YJL190C_mRNA
											RPL34B	24.7311	-1.69965	0.399402	-4.25548	2.08605e-05	0.000488483	TRUE	DOWN	YIL052C_mRNA
											RPS10A	39.3641	-1.70097	0.334758	-5.0812	3.7505e-07	1.75649e-05	TRUE	DOWN	YOR293W_mRNA
											RPL11B	18.7046	-1.72729	0.444356	-3.88719	0.000101413	0.00170132	TRUE	DOWN	YGR085C_mRNA
											RPL25	36.7312	-1.73811	0.353436	-4.91775	8.75455e-07	3.93604e-05	TRUE	DOWN	YOL127W_mRNA
											RIB4	13.8191	-1.75892	0.512646	-3.43106	0.000601236	0.00711357	TRUE	DOWN	YOL143C_mRNA
											RPL35B	11.8658	-1.79513	0.587013	-3.05807	0.00222764	0.018144	TRUE	DOWN	YDL136W_mRNA
											GSP1	14.9711	-1.79879	0.543432	-3.31006	0.000932763	0.00936094	TRUE	DOWN	YLR293C_mRNA
											RPS28A	61.3097	-1.81093	0.288875	-6.2689	3.6361e-10	5.10871e-08	TRUE	DOWN	YOR167C_mRNA
											LHP1	9.94423	-1.83937	0.611959	-3.00571	0.00264959	0.0206951	TRUE	DOWN	YDL051W_mRNA
											GPP1	15.728	-1.85519	0.513549	-3.6125	0.000303264	0.00413898	TRUE	DOWN	YIL053W_mRNA
											RPL29	60.9082	-1.97304	0.330894	-5.96276	2.48016e-09	1.99121e-07	TRUE	DOWN	YFR032C-A_mRNA
											RPS11A	22.8645	-1.97637	0.423641	-4.66519	3.08333e-06	0.000119506	TRUE	DOWN	YDR025W_mRNA
											BUD19	22.4941	-2.00304	0.446839	-4.48269	7.37087e-06	0.000231237	TRUE	DOWN	YJL188C_mRNA
											RPL21A	25.4159	-2.01593	0.445884	-4.5212	6.14893e-06	0.000203276	TRUE	DOWN	YBR191W_mRNA
											RPS10B	24.4788	-2.03401	0.422095	-4.81884	1.44392e-06	5.7963e-05	TRUE	DOWN	YMR230W_mRNA
											RPS27B	50.6461	-2.08885	0.336846	-6.20121	5.60301e-10	5.72526e-08	TRUE	DOWN	YHR021C_mRNA
											NHP2	11.2764	-2.12586	0.580897	-3.65962	0.000252594	0.00368722	TRUE	DOWN	YDL208W_mRNA
											NA.8	1292.17	-2.26264	0.780909	-2.89744	0.0037622	0.0262653	TRUE	DOWN	YLR154C-G_mRNA
											ASN1	7.39664	-2.39237	0.720585	-3.32004	0.000900034	0.00929279	TRUE	DOWN	YPR145W_mRNA
											ARG1	16.9845	-2.3976	0.850741	-2.81824	0.00482871	0.0312923	TRUE	DOWN	YOL058W_mRNA
											RPS30B	8.80718	-2.40889	0.678942	-3.54801	0.000388158	0.00507314	TRUE	DOWN	YOR182C_mRNA
											RPS29B	11.5674	-2.43646	0.612892	-3.97535	7.02745e-05	0.0012342	TRUE	DOWN	YDL061C_mRNA
											RPL40B	49.6193	-2.44081	0.336926	-7.24436	4.34497e-13	1.22094e-10	TRUE	DOWN	YKR094C_mRNA
											LYS20	5.10826	-2.55478	0.883094	-2.89299	0.00381599	0.0264764	TRUE	DOWN	YDL182W_mRNA
											BAT1	7.6635	-2.60298	0.741796	-3.50903	0.000449751	0.00555517	TRUE	DOWN	YHR208W_mRNA
											ALD5	6.54953	-3.27339	0.892638	-3.66709	0.000245322	0.00362819	TRUE	DOWN	YER073W_mRNA
											LEU1	15.4139	-3.75783	0.667437	-5.63024	1.79963e-08	1.06462e-06	TRUE	DOWN	YGL009C_mRNA
											HIS3	72.606	-3.99622	0.589261	-6.78174	1.18737e-11	2.66922e-09	TRUE	DOWN	YOR202W_mRNA
											ILV1	2.08459	-4.61348	1.53501	-3.00551	0.00265133	0.0206951	TRUE	DOWN	YER086W_mRNA
											ARG7	2.53297	-4.90732	1.44611	-3.39346	0.00069015	0.00783564	TRUE	DOWN	YMR062C_mRNA
2 hour post-sequencing initiation											2 hour post-sequencing initiation
gene name	gene base mean	log 2 fold change	lfcSE	stat	p-value	p-adjusted	significance	significance_reg	gene ID		transcript name	transcript base mean	log 2 fold change	lfcSE	stat	p-value	p-adjusted	significance	significance_reg	gene ID
HygR	56.6553	8.1408	1.23283	6.60335	4.01965e-11	3.70813e-09	TRUE	UP	HygR		HygR	57.005	7.24964	1.0785	6.722	1.79252e-11	1.99806e-09	TRUE	UP	HygR
URA3	84.0823	6.81306	0.783632	8.69421	3.49261e-18	1.28877e-15	TRUE	UP	YEL021W		URA3	83.6837	6.80181	0.781198	8.70689	3.12314e-18	1.73241e-15	TRUE	UP	YEL021W_mRNA
HXT6	7.33749	6.16321	1.36606	4.51168	6.43168e-06	0.000118665	TRUE	UP	YDR343C		HXT6	8.18798	6.32009	1.34755	4.69007	2.73114e-06	7.43704e-05	TRUE	UP	YDR343C_mRNA
TMA10	48.9825	5.43171	0.676329	8.03116	9.65529e-16	2.13768e-13	TRUE	UP	YLR327C		AIM17	12.0045	5.88143	1.30512	4.50642	6.59309e-06	0.000149866	TRUE	UP	YHL021C_mRNA
NA.6	7.28303	5.16122	1.37584	3.75133	0.000175898	0.00172318	TRUE	UP	YLR177W		TMA10	48.3529	5.40768	0.675558	8.00477	1.19693e-15	2.85896e-13	TRUE	UP	YLR327C_mRNA
AIM17	12.1267	5.0163	1.17788	4.25874	2.0558e-05	0.000316079	TRUE	UP	YHL021C		NA.8	3.8138	5.22355	1.53036	3.41329	0.000641846	0.0066984	TRUE	UP	YNL194C_mRNA
NA.8	6.11171	4.87204	1.39699	3.48752	0.000487514	0.00412192	TRUE	UP	YGR161W-C		NA.3	7.21323	5.14243	1.36868	3.75723	0.000171803	0.00220964	TRUE	UP	YLR177W_mRNA
STF2	10.7649	4.83195	1.17909	4.09804	4.16668e-05	0.000542649	TRUE	UP	YGR008C		HXT4	3.62789	5.13941	1.50339	3.41854	0.000629587	0.00662056	TRUE	UP	YHR092C_mRNA
EMI2	15.2699	4.71361	0.966509	4.87695	1.07741e-06	2.65043e-05	TRUE	UP	YDR516C		NA.10	3.45271	5.0716	1.53911	3.29516	0.000983658	0.00898731	TRUE	UP	YOR062C_mRNA
GSY2	4.93443	4.55977	1.44905	3.14672	0.00165111	0.0105045	TRUE	UP	YLR258W		MIG1	3.05873	4.89461	1.5484	3.16108	0.00157188	0.0126355	TRUE	UP	YGL035C_mRNA
HRB1	4.46819	4.43146	1.48682	2.9805	0.00287778	0.0169452	TRUE	UP	YNL004W		NA.6	6.04388	4.85102	1.3901	3.4897	0.000483569	0.00542636	TRUE	UP	YGR161W-C_mRNA
HSP42	12.2212	4.42131	1.0069	4.391	1.12832e-05	0.000186425	TRUE	UP	YDR171W		TPO4	5.85807	4.83509	1.39464	3.46691	0.000526485	0.00579133	TRUE	UP	YOR273C_mRNA
TFS1	21.6323	4.21575	0.747888	5.63688	1.73161e-08	8.62148e-07	TRUE	UP	YLR178C		STF2	10.4489	4.78341	1.17672	4.06504	4.80241e-05	0.000779576	TRUE	UP	YGR008C_mRNA
MSC1	21.4387	4.21062	0.743856	5.66054	1.509e-08	7.95458e-07	TRUE	UP	YML128C		EMI2	15.2566	4.70619	0.962149	4.89134	1.00154e-06	3.04467e-05	TRUE	UP	YDR516C_mRNA
SDP1	3.88456	4.20716	1.50373	2.79781	0.00514499	0.0267395	TRUE	UP	YIL113W		RME1	9.87012	4.67836	1.17456	3.98306	6.80344e-05	0.00104361	TRUE	UP	YGR044C_mRNA
HXT7	18.0887	4.17657	0.794584	5.2563	1.46985e-07	5.08478e-06	TRUE	UP	YDR342C		DDR2	9.92535	4.66051	1.17636	3.9618	7.4388e-05	0.0011307	TRUE	UP	YOL052C-A_mRNA
OM45	6.48718	4.07918	1.26523	3.22407	0.00126382	0.00852499	TRUE	UP	YIL136W		PMT1	5.1165	4.61018	1.41784	3.25156	0.00114774	0.00989186	TRUE	UP	YDL095W_mRNA
NA.12	6.57971	4.07639	1.25562	3.2465	0.00116833	0.00803315	TRUE	UP	YKL103C		RGI1	4.84447	4.52427	1.43578	3.1511	0.00162656	0.0130125	TRUE	UP	YER067W_mRNA
HXK1	6.09882	4.02188	1.33104	3.02161	0.00251436	0.0149645	TRUE	UP	YFR053C		GSY2	4.76029	4.49942	1.4427	3.11875	0.00181623	0.0141903	TRUE	UP	YLR258W_mRNA
RTC3	24.7581	3.98351	0.654053	6.09051	1.12553e-09	6.92198e-08	TRUE	UP	YHR087W		TFS1	21.6343	4.49433	0.791323	5.67951	1.35079e-08	8.06615e-07	TRUE	UP	YLR178C_mRNA
TPO4	6.17154	3.97859	1.25534	3.16933	0.00152793	0.00992755	TRUE	UP	YOR273C		HRB1	4.41774	4.40994	1.47413	2.99155	0.0027757	0.0208115	TRUE	UP	YNL004W_mRNA
RME1	5.66099	3.84616	1.26958	3.02947	0.00244987	0.0147392	TRUE	UP	YGR044C		HSP42	12.087	4.40094	1.00186	4.39277	1.11916e-05	0.000233905	TRUE	UP	YDR171W_mRNA
HSP26	8.08348	3.82601	1.0971	3.48738	0.000487779	0.00412192	TRUE	UP	YBR072W		HXK1	11.693	4.34936	1.00569	4.32476	1.527e-05	0.000303945	TRUE	UP	YFR053C_mRNA
COX5A	13.7067	3.80815	0.833403	4.5694	4.89117e-06	9.49917e-05	TRUE	UP	YNL052W		SDP1	3.85449	4.19082	1.49296	2.80706	0.00499956	0.033237	TRUE	UP	YIL113W_mRNA
NA.4	16.2765	3.80151	0.76777	4.95137	7.36939e-07	1.94236e-05	TRUE	UP	YER062C		MSC1	21.1926	4.18929	0.73944	5.66549	1.46606e-08	8.45259e-07	TRUE	UP	YML128C_mRNA
SAC6	8.0139	3.76519	1.05652	3.56377	0.000365565	0.00331706	TRUE	UP	YDR129C		UIP4	3.81556	4.16507	1.48673	2.8015	0.00508656	0.0334832	TRUE	UP	YPL186C_mRNA
DDP1	5.47846	3.75865	1.28314	2.92926	0.00339771	0.0192885	TRUE	UP	YOR163W		EGO4	3.78091	4.15689	1.49129	2.78744	0.00531257	0.0345864	TRUE	UP	YNR034W-A_mRNA
HSP30	8.31783	3.75593	1.07269	3.5014	0.000462817	0.00400265	TRUE	UP	YCR021C		APE1	6.6063	4.08079	1.24688	3.2728	0.00106488	0.00942052	TRUE	UP	YKL103C_mRNA
DDR2	10.4861	3.69798	0.925192	3.99699	6.41539e-05	0.000780422	TRUE	UP	YOL052C-A		HXT7	16.8538	4.05999	0.799096	5.08073	3.7599e-07	1.39701e-05	TRUE	UP	YDR342C_mRNA
BDH2	4.79959	3.54826	1.31936	2.68938	0.00715853	0.0353772	TRUE	UP	YAL061W		RTC3	24.5308	3.96535	0.652524	6.07693	1.22503e-09	8.5344e-08	TRUE	UP	YHR087W_mRNA
TDH1	73.5585	3.40584	0.390311	8.72598	2.63886e-18	1.28877e-15	TRUE	UP	YJL052W		GPH1	5.98273	3.90577	1.24758	3.13067	0.00174406	0.0138202	TRUE	UP	YPR160W_mRNA
SED1	47.7824	3.37987	0.573949	5.8888	3.89006e-09	2.15315e-07	TRUE	UP	YDR077W		HSP26	8.11147	3.82518	1.08461	3.52679	0.000420629	0.0047843	TRUE	UP	YBR072W_mRNA
PRE2	12.1267	3.32725	0.79615	4.17918	2.9256e-05	0.000409955	TRUE	UP	YPR103W		GPP2	16.1107	3.78194	0.76382	4.95135	7.37e-07	2.46453e-05	TRUE	UP	YER062C_mRNA
YJU3	5.60777	3.21449	1.12931	2.84643	0.00442125	0.0242293	TRUE	UP	YKL094W		SAC6	8.07355	3.76984	1.04737	3.59932	0.000319046	0.0037833	TRUE	UP	YDR129C_mRNA
ARC35	9.55935	3.19852	0.87655	3.64898	0.00026328	0.00249103	TRUE	UP	YNR035C		COX5A	13.2726	3.75563	0.830782	4.52059	6.16665e-06	0.00014522	TRUE	UP	YNL052W_mRNA
RPN11	16.822	3.19527	0.671487	4.7585	1.95042e-06	4.23355e-05	TRUE	UP	YFR004W		HSP30	7.79003	3.65071	1.0743	3.39822	0.00067827	0.00695747	TRUE	UP	YCR021C_mRNA
CRH1	7.6755	3.18716	0.98399	3.23902	0.00119941	0.00819597	TRUE	UP	YGR189C		ENT1	4.92684	3.61318	1.30529	2.76811	0.00563818	0.0359811	TRUE	UP	YDL161W_mRNA
SUP35	7.44335	3.18526	1.00239	3.17766	0.0014847	0.00972524	TRUE	UP	YDR172W		PRY2	5.03603	3.58632	1.2867	2.78722	0.00531622	0.0345864	TRUE	UP	YKR013W_mRNA
YAP1	7.44475	3.1457	0.975275	3.22545	0.00125774	0.00852499	TRUE	UP	YML007W		BDH2	4.85442	3.56879	1.30465	2.73543	0.00622997	0.0387231	TRUE	UP	YAL061W_mRNA
GLC8	11.0408	3.14101	0.809123	3.882	0.000103602	0.00117028	TRUE	UP	YMR311C		PRE2	11.8362	3.56181	0.835536	4.26291	2.01785e-05	0.000379085	TRUE	UP	YPR103W_mRNA
PRC1	26.6448	3.10935	0.559013	5.56221	2.6638e-08	1.13416e-06	TRUE	UP	YMR297W		PDE1	4.58722	3.52965	1.30393	2.70693	0.0067909	0.0412151	TRUE	UP	YGL248W_mRNA
HSP12	209.931	3.10733	0.287596	10.8045	3.27737e-27	3.62804e-24	TRUE	UP	YFL014W		OM45	6.59645	3.48797	1.11539	3.12712	0.00176527	0.0139223	TRUE	UP	YIL136W_mRNA
MRPL13	8.83503	3.10401	0.898326	3.45533	0.00054962	0.00454052	TRUE	UP	YKR006C		DDP1	6.58511	3.44001	1.08193	3.17951	0.00147525	0.0121509	TRUE	UP	YOR163W_mRNA
HSP82	8.96162	3.08783	0.88679	3.48203	0.000497625	0.00417326	TRUE	UP	YPL240C		TDH1	73.0722	3.38863	0.390631	8.67475	4.14452e-18	1.73241e-15	TRUE	UP	YJL052W_mRNA
SQT1	5.18162	3.0878	1.14631	2.6937	0.00706646	0.0350788	TRUE	UP	YIR012W		YJU3	6.22866	3.37202	1.09722	3.07323	0.00211754	0.0160933	TRUE	UP	YKL094W_mRNA
ZPS1	6.99541	3.06354	0.988459	3.09931	0.00193974	0.0120634	TRUE	UP	YOL154W		SED1	47.4491	3.29201	0.553051	5.95245	2.64159e-09	1.69874e-07	TRUE	UP	YDR077W_mRNA
FUN14	5.35119	3.06345	1.16288	2.63437	0.00842933	0.0393724	TRUE	UP	YAL008W		GLK1	28.9435	3.23869	0.534979	6.05386	1.41413e-09	9.45769e-08	TRUE	UP	YCL040W_mRNA
ZRT1	12.04	3.04732	0.761644	4.00097	6.30832e-05	0.000775924	TRUE	UP	YGL255W		CRH1	7.75391	3.19472	0.97238	3.28546	0.00101815	0.0091524	TRUE	UP	YGR189C_mRNA
ALD6	27.0746	3.03201	0.589028	5.14747	2.64018e-07	8.8566e-06	TRUE	UP	YPL061W		ARC35	9.46763	3.1807	0.87219	3.6468	0.000265528	0.00321712	TRUE	UP	YNR035C_mRNA
TMA17	11.3602	2.98058	0.778893	3.82669	0.000129877	0.00139586	TRUE	UP	YDL110C		RPN11	16.6586	3.17663	0.668733	4.75022	2.03194e-06	5.75831e-05	TRUE	UP	YFR004W_mRNA
NA.9	9.24361	2.90857	0.846443	3.43622	0.000589891	0.00476649	TRUE	UP	YJR015W		NA.4	9.13934	3.16735	0.877355	3.61012	0.000306059	0.00365522	TRUE	UP	YJR015W_mRNA
PUP1	12.3676	2.89934	0.771825	3.75647	0.000172325	0.00171329	TRUE	UP	YOR157C		SUP35	7.35579	3.16698	0.993764	3.18685	0.00143831	0.0119223	TRUE	UP	YDR172W_mRNA
GLK1	5.93192	2.89211	1.08148	2.67421	0.00749051	0.0360521	TRUE	UP	YCL040W		YAP1	7.55273	3.16133	0.968136	3.26538	0.00109318	0.00956958	TRUE	UP	YML007W_mRNA
MDG1	7.73959	2.84647	0.914728	3.11182	0.0018594	0.0116291	TRUE	UP	YNL173C		PRC1	26.7379	3.10757	0.553144	5.61802	1.93153e-08	1.04178e-06	TRUE	UP	YMR297W_mRNA
TIM11	26.1101	2.83653	0.530773	5.34416	9.08367e-08	3.38524e-06	TRUE	UP	YDR322C-A		GLC8	10.8118	3.09986	0.806637	3.84295	0.000121565	0.00165249	TRUE	UP	YMR311C_mRNA
YET3	21.1214	2.836	0.572147	4.95677	7.16737e-07	1.93519e-05	TRUE	UP	YDL072C		MRPL13	8.75146	3.08721	0.893003	3.45711	0.00054601	0.00592811	TRUE	UP	YKR006C_mRNA
ERG10	21.8001	2.77546	0.56802	4.88619	1.02804e-06	2.63823e-05	TRUE	UP	YPL028W		HSP12	212.206	3.06934	0.290193	10.5769	3.81517e-26	3.18949e-23	TRUE	UP	YFL014W_mRNA
PUP3	15.2421	2.73957	0.672497	4.07373	4.62653e-05	0.000588687	TRUE	UP	YER094C		HSP82	8.87788	3.06574	0.881552	3.47766	0.000505812	0.00560451	TRUE	UP	YPL240C_mRNA
NA.7	11.3781	2.71514	0.766878	3.54051	0.000399351	0.00359416	TRUE	UP	YLR257W		ZPS1	6.93931	3.04685	0.984001	3.09639	0.00195892	0.0151635	TRUE	UP	YOL154W_mRNA
BDH1	6.69957	2.68772	0.980302	2.74173	0.00611165	0.0311779	TRUE	UP	YAL060W		FUN14	5.31113	3.04547	1.15111	2.64569	0.00815247	0.0474462	TRUE	UP	YAL008W_mRNA
TPS1	15.7208	2.5781	0.635417	4.05733	4.96364e-05	0.000624403	TRUE	UP	YBR126C		RPT1	14.9926	3.01636	0.685327	4.40134	1.07585e-05	0.0002277	TRUE	UP	YKL145W_mRNA
ALD4	11.2349	2.56031	0.744272	3.44002	0.000581662	0.00473456	TRUE	UP	YOR374W		ALD6	26.7516	3.00851	0.57962	5.19048	2.09752e-07	8.76762e-06	TRUE	UP	YPL061W_mRNA
RFS1	10.204	2.55521	0.757323	3.374	0.000740848	0.00562253	TRUE	UP	YBR052C		TMA17	11.3675	2.97564	0.77364	3.84629	0.00011992	0.0016497	TRUE	UP	YDL110C_mRNA
LSC2	10.1296	2.53085	0.771225	3.28159	0.00103222	0.00723209	TRUE	UP	YGR244C		NA.2	3778	2.96702	0.732656	4.04968	5.12884e-05	0.000822727	TRUE	UP	YLR154W-A_mRNA
CIS3	6.15995	2.51914	0.965348	2.60957	0.00906563	0.041299	TRUE	UP	YJL158C		NAS2	6.43203	2.90894	1.02458	2.83915	0.00452344	0.0304967	TRUE	UP	YIL007C_mRNA
KTR1	13.7548	2.51606	0.663428	3.79251	0.00014913	0.00155742	TRUE	UP	YOR099W		YET3	21.1969	2.8368	0.569503	4.98118	6.31989e-07	2.24827e-05	TRUE	UP	YDL072C_mRNA
YIP5	6.13825	2.50519	0.959135	2.61193	0.00900329	0.0411845	TRUE	UP	YGL161C		ZRT1	12.1292	2.8321	0.726307	3.89931	9.64688e-05	0.0013786	TRUE	UP	YGL255W_mRNA
PNC1	10.6937	2.45814	0.738027	3.33068	0.000866328	0.00635116	TRUE	UP	YGL037C		MDG1	7.6689	2.82406	0.908945	3.10697	0.00189019	0.0146995	TRUE	UP	YNL173C_mRNA
PDC1	14.1012	2.38556	0.676563	3.526	0.000421887	0.00373623	TRUE	UP	YLR044C		TIM11	25.962	2.82006	0.528421	5.33677	9.46153e-08	4.51991e-06	TRUE	UP	YDR322C-A_mRNA
DLD1	7.78888	2.37626	0.894216	2.65737	0.00787532	0.0370978	TRUE	UP	YDL174C		CIS3	5.94603	2.80942	1.01355	2.77185	0.0055739	0.0357071	TRUE	UP	YJL158C_mRNA
CIT2	44.7157	2.36586	0.476821	4.96175	6.98626e-07	1.93345e-05	TRUE	UP	YCR005C		ERG10	21.5809	2.7514	0.565607	4.86451	1.14739e-06	3.36566e-05	TRUE	UP	YPL028W_mRNA
MHF1	10.2667	2.34903	0.738105	3.18251	0.00146004	0.00962062	TRUE	UP	YOL086W-A		PUP3	15.2588	2.73656	0.666972	4.10296	4.07889e-05	0.000703083	TRUE	UP	YER094C_mRNA
ARC15	6.68378	2.32813	0.901012	2.58391	0.00976875	0.0439594	TRUE	UP	YIL062C		PUP1	12.4227	2.70316	0.734388	3.68084	0.000232469	0.002858	TRUE	UP	YOR157C_mRNA
AHA1	9.9329	2.30741	0.749125	3.08013	0.00206909	0.0127249	TRUE	UP	YDR214W		RRT15	7.18762	2.69307	0.952165	2.82837	0.0046786	0.0312905	TRUE	UP	YLR162W-A_mRNA
TOA2	7.89926	2.30474	0.862404	2.67246	0.00752978	0.0360843	TRUE	UP	YKL058W		CDC19	87.8309	2.68313	0.414302	6.47627	9.40206e-11	9.82516e-09	TRUE	UP	YAL038W_mRNA
BSD2	8.63116	2.28963	0.80757	2.83521	0.00457959	0.0247298	TRUE	UP	YBR290W		BDH1	6.65153	2.66684	0.970351	2.74833	0.00599005	0.0376518	TRUE	UP	YAL060W_mRNA
NA.19	7.5169	2.25679	0.846584	2.66576	0.00768135	0.0365833	TRUE	UP	YDL124W		NA.7	11.0382	2.65677	0.767833	3.46009	0.000539989	0.00590106	TRUE	UP	YLR257W_mRNA
NA.20	8.43831	2.2431	0.850382	2.63775	0.00834571	0.039147	TRUE	UP	YJL068C		KTR1	13.435	2.63476	0.677098	3.89126	9.9726e-05	0.00141307	TRUE	UP	YOR099W_mRNA
INH1	26.0405	2.22586	0.513494	4.33474	1.45933e-05	0.000227532	TRUE	UP	YDL181W		DLD1	7.71055	2.6252	0.922645	2.8453	0.00443696	0.0300815	TRUE	UP	YDL174C_mRNA
RFA2	9.54306	2.18141	0.831749	2.62268	0.008724	0.0404078	TRUE	UP	YNL312W		TPS1	15.6779	2.56991	0.631256	4.0711	4.67917e-05	0.000767016	TRUE	UP	YBR126C_mRNA
SDH4	16.7975	2.13056	0.603601	3.52975	0.000415959	0.00371344	TRUE	UP	YDR178W		ALD4	11.1355	2.54144	0.738942	3.43929	0.00058324	0.00618692	TRUE	UP	YOR374W_mRNA
TPM1	84.117	2.11496	0.325113	6.5053	7.75406e-11	6.60288e-09	TRUE	UP	YNL079C		RFS1	10.0106	2.51747	0.757174	3.32483	0.000884733	0.00831752	TRUE	UP	YBR052C_mRNA
IDH1	15.612	2.09567	0.607688	3.44859	0.000563512	0.00462079	TRUE	UP	YNL037C		LSC2	10.0617	2.51247	0.767498	3.27358	0.00106194	0.00942052	TRUE	UP	YGR244C_mRNA
SEC62	11.9777	2.0955	0.74457	2.81438	0.00488717	0.0257676	TRUE	UP	YPL094C		HAM1	9.62416	2.46864	0.780839	3.16152	0.00156947	0.0126355	TRUE	UP	YJR069C_mRNA
YRB1	99.1105	2.09436	0.302023	6.93442	4.07893e-12	5.01708e-10	TRUE	UP	YDR002W		MHF1	10.7858	2.43113	0.725683	3.35012	0.000807761	0.00781742	TRUE	UP	YOL086W-A_mRNA
MDH1	12.2458	2.06578	0.716838	2.8818	0.00395416	0.0220183	TRUE	UP	YKL085W		VMA1	11.7555	2.40574	0.699621	3.43864	0.000584649	0.00618692	TRUE	UP	YDL185W_mRNA
CWP1	28.1836	2.04301	0.533103	3.8323	0.000126949	0.00137777	TRUE	UP	YKL096W		SBH2	28.1883	2.37051	0.513191	4.61916	3.85292e-06	9.91091e-05	TRUE	UP	YER019C-A_mRNA
SBH2	8.80126	2.03325	0.795445	2.55612	0.0105848	0.0468693	TRUE	UP	YER019C-A		CIT2	45.3067	2.33024	0.468708	4.97161	6.63988e-07	2.31289e-05	TRUE	UP	YCR005C_mRNA
PRE7	13.0834	2.02294	0.654096	3.09273	0.00198323	0.012265	TRUE	UP	YBL041W		AHA1	10.0551	2.32498	0.743926	3.12528	0.00177635	0.0139439	TRUE	UP	YDR214W_mRNA
AI1	13.2288	2.01597	0.684021	2.94723	0.00320631	0.0183906	TRUE	UP	Q0050		NA.1	56.0344	2.31184	0.377139	6.12993	8.79174e-10	6.9999e-08	TRUE	UP	YLR154W-F_mRNA
CAJ1	17.4102	2.01219	0.606254	3.31905	0.000903253	0.0065353	TRUE	UP	YER048C		NA.19	7.70852	2.29352	0.835247	2.74592	0.00603412	0.0377867	TRUE	UP	YDL124W_mRNA
RPT5	10.1739	1.98156	0.711565	2.78479	0.00535618	0.0274504	TRUE	UP	YOR117W		PNC1	10.8323	2.28808	0.712958	3.20928	0.00133068	0.0112369	TRUE	UP	YGL037C_mRNA
KRE2	25.2905	1.96143	0.522352	3.755	0.000173341	0.00171329	TRUE	UP	YDR483W		TOA2	8.83842	2.25693	0.804199	2.80643	0.00500941	0.033237	TRUE	UP	YKL058W_mRNA
ARP3	10.3435	1.96082	0.770725	2.54412	0.0109554	0.0479352	TRUE	UP	YJR065C		NA.22	8.36273	2.21702	0.838238	2.64486	0.00817256	0.0474462	TRUE	UP	YJL068C_mRNA
CYT1	10.1549	1.94753	0.757421	2.57127	0.0101326	0.0450474	TRUE	UP	YOR065W		INH1	25.8488	2.20677	0.509282	4.33309	1.4703e-05	0.000299797	TRUE	UP	YDL181W_mRNA
SAH1	75.2376	1.92223	0.3419	5.62221	1.88527e-08	8.62148e-07	TRUE	UP	YER043C		RFA2	9.69635	2.19864	0.8121	2.70736	0.00678214	0.0412151	TRUE	UP	YNL312W_mRNA
SDD2	29.5813	1.89431	0.451886	4.192	2.76506e-05	0.000392425	TRUE	UP	YMR074C		FKS1	8.27567	2.17264	0.802685	2.70671	0.00679531	0.0412151	TRUE	UP	YLR342W_mRNA
TCB3	11.3543	1.89301	0.710977	2.66255	0.00775504	0.0366873	TRUE	UP	YML072C		SDH4	17.1487	2.1584	0.595526	3.62436	0.000289677	0.00348446	TRUE	UP	YDR178W_mRNA
NA.15	16.1489	1.88461	0.638989	2.94937	0.00318426	0.0183906	TRUE	UP	YJL055W		PRE7	17.1806	2.13666	0.577806	3.69788	0.00021741	0.00273315	TRUE	UP	YBL041W_mRNA
RPL3	19.996	1.86791	0.535227	3.48994	0.000483123	0.00412192	TRUE	UP	YOR063W		BSD2	8.92247	2.12788	0.765199	2.78082	0.0054221	0.0350029	TRUE	UP	YBR290W_mRNA
AI2	10.3226	1.86621	0.72004	2.59182	0.00954694	0.0433134	TRUE	UP	Q0055		IDH1	15.8656	2.11972	0.599233	3.53739	0.000404106	0.00462784	TRUE	UP	YNL037C_mRNA
PST2	34.7007	1.86061	0.471636	3.94501	7.97965e-05	0.000920153	TRUE	UP	YDR032C		TPM1	83.83	2.08591	0.322569	6.46655	1.00264e-10	9.86121e-09	TRUE	UP	YNL079C_mRNA
SOD1	22.9545	1.84184	0.489575	3.76211	0.000168484	0.00169556	TRUE	UP	YJR104C		MDH1	12.4022	2.08034	0.703188	2.95844	0.00309199	0.0224774	TRUE	UP	YKL085W_mRNA
RPN6	18.88	1.82624	0.571482	3.19562	0.0013953	0.00930482	TRUE	UP	YDL097C		CWP1	27.8677	2.07386	0.519039	3.99559	6.45344e-05	0.000999088	TRUE	UP	YKL096W_mRNA
ERG13	21.1757	1.82008	0.509524	3.57212	0.000354109	0.00323966	TRUE	UP	YML126C		YRB1	98.6442	2.04728	0.300708	6.80818	9.88406e-12	1.27124e-09	TRUE	UP	YDR002W_mRNA
ELO1	17.2062	1.80807	0.573356	3.15348	0.00161338	0.0103238	TRUE	UP	YJL196C		RPL10	280.494	2.03287	0.29747	6.83387	8.26556e-12	1.23036e-09	TRUE	UP	YLR075W_mRNA
15S_RRNA	183.991	1.79757	0.352978	5.09259	3.53203e-07	1.02894e-05	TRUE	UP	Q0020		CYT1	9.51546	2.00403	0.762112	2.62958	0.00854899	0.0491887	TRUE	UP	YOR065W_mRNA
KRS1	27.4319	1.78856	0.474434	3.76988	0.000163326	0.00165873	TRUE	UP	YDR037W		CAJ1	17.1737	1.97748	0.59931	3.29959	0.000968265	0.00889527	TRUE	UP	YER048C_mRNA
RHO1	25.2744	1.77662	0.494983	3.58926	0.000331617	0.00305917	TRUE	UP	YPR165W		ORM2	14.0936	1.97557	0.64168	3.07874	0.00207875	0.0159434	TRUE	UP	YLR350W_mRNA
ORM2	13.3905	1.76542	0.659305	2.67769	0.00741308	0.0358353	TRUE	UP	YLR350W		SEC62	12.0615	1.96543	0.728667	2.6973	0.0069904	0.0418923	TRUE	UP	YPL094C_mRNA
NA.16	15.2088	1.76072	0.622853	2.82687	0.00470053	0.0250167	TRUE	UP	YOR052C		RPT5	10.0926	1.9603	0.708513	2.76678	0.0056613	0.0359912	TRUE	UP	YOR117W_mRNA
PDA1	30.4038	1.75292	0.531122	3.3004	0.000965456	0.00694	TRUE	UP	YER178W		COB	17.8561	1.89579	0.561807	3.37446	0.000739609	0.00744956	TRUE	UP	Q0105_mRNA
LSC1	19.5562	1.74488	0.650954	2.6805	0.00735134	0.0356927	TRUE	UP	YOR142W		KRE2	25.3893	1.89401	0.513738	3.68672	0.00022716	0.00281342	TRUE	UP	YDR483W_mRNA
TPI1	223.331	1.73984	0.247534	7.02869	2.08479e-12	2.88483e-10	TRUE	UP	YDR050C		SAH1	75.0615	1.89062	0.339136	5.5748	2.4782e-08	1.29486e-06	TRUE	UP	YER043C_mRNA
QCR6	14.9209	1.6989	0.589593	2.88148	0.00395812	0.0220183	TRUE	UP	YFR033C		TCB3	11.255	1.86817	0.702269	2.6602	0.00780953	0.0458159	TRUE	UP	YML072C_mRNA
LCB2	12.4624	1.67341	0.640284	2.61355	0.00896079	0.0411601	TRUE	UP	YDR062W		NA.15	16.037	1.85993	0.628439	2.9596	0.00308041	0.0224774	TRUE	UP	YJL055W_mRNA
ADH3	21.6614	1.62339	0.521343	3.11387	0.00184654	0.0116143	TRUE	UP	YMR083W		YRO2	17.1112	1.85057	0.573229	3.22832	0.0012452	0.0105684	TRUE	UP	YBR054W_mRNA
PRE10	18.8239	1.62023	0.535437	3.026	0.00247811	0.0148285	TRUE	UP	YOR362C		RHO1	25.3603	1.84282	0.487983	3.7764	0.000159112	0.00207839	TRUE	UP	YPR165W_mRNA
YRO2	15.77	1.61311	0.591198	2.72854	0.00636156	0.0321564	TRUE	UP	YBR054W		SDD2	29.6011	1.84267	0.447875	4.11425	3.88438e-05	0.00067653	TRUE	UP	YMR074C_mRNA
NA.17	19.6163	1.56667	0.560385	2.7957	0.00517874	0.0267891	TRUE	UP	snR30		PST2	35.054	1.82846	0.466067	3.92316	8.73963e-05	0.00127067	TRUE	UP	YDR032C_mRNA
CWP2	524.545	1.56565	0.243661	6.42555	1.31398e-10	1.03898e-08	TRUE	UP	YKL096W-A		TMC1	14.9118	1.82302	0.620214	2.93934	0.00328908	0.0236023	TRUE	UP	YOR052C_mRNA
EFT1	45.5081	1.55423	0.392628	3.95852	7.54166e-05	0.000888151	TRUE	UP	YOR133W		KRS1	27.035	1.80847	0.470299	3.84537	0.000120373	0.0016497	TRUE	UP	YDR037W_mRNA
GLN1	49.4915	1.49553	0.362565	4.12487	3.70943e-05	0.000500773	TRUE	UP	YPR035W		SEC4	14.1516	1.80521	0.615397	2.93342	0.00335254	0.0238529	TRUE	UP	YFL005W_mRNA
COX9	34.7796	1.40099	0.44633	3.13891	0.0016958	0.0107272	TRUE	UP	YDL067C		RPN6	18.6972	1.80413	0.563777	3.20008	0.0013739	0.0115435	TRUE	UP	YDL097C_mRNA
TEF2	258.857	1.35991	0.333449	4.07831	4.53635e-05	0.000583923	TRUE	UP	YBR118W		ERG13	21.0253	1.7988	0.50837	3.53836	0.000402621	0.00462784	TRUE	UP	YML126C_mRNA
EFT2	83.9946	1.33891	0.297178	4.50542	6.62416e-06	0.000120212	TRUE	UP	YDR385W		ELO1	17.0838	1.78631	0.569032	3.13921	0.00169402	0.0134876	TRUE	UP	YJL196C_mRNA
PHB2	25.9586	1.33099	0.473179	2.81286	0.00491027	0.0257676	TRUE	UP	YGR231C		MBF1	86.2362	1.77345	0.342409	5.17933	2.22679e-07	9.08094e-06	TRUE	UP	YOR298C-A_mRNA
TEF1	252.966	1.31832	0.31781	4.14813	3.352e-05	0.000463834	TRUE	UP	YPR080W		RPL3	20.1712	1.72914	0.521177	3.31775	0.000907449	0.00845831	TRUE	UP	YOR063W_mRNA
HOR7	184.064	1.27312	0.268235	4.74629	2.07178e-06	4.41049e-05	TRUE	UP	YMR251W-A		PDA1	30.1597	1.72911	0.518431	3.33528	0.000852134	0.00814807	TRUE	UP	YER178W_mRNA
RPL8A	46.4566	1.25633	0.3707	3.38908	0.000701275	0.00546698	TRUE	UP	YHL033C		RPS2	223.306	1.71446	0.269327	6.3657	1.94402e-10	1.71074e-08	TRUE	UP	YGL123W_mRNA
FPR1	83.546	1.20953	0.31477	3.8426	0.000121739	0.00134765	TRUE	UP	YNL135C		TPI1	222.939	1.71041	0.247723	6.90454	5.0366e-12	8.4212e-10	TRUE	UP	YDR050C_mRNA
YEF3	61.0556	1.11349	0.338636	3.28817	0.0010084	0.00715577	TRUE	UP	YLR249W		LSC1	19.3035	1.70592	0.631143	2.70291	0.00687353	0.0413401	TRUE	UP	YOR142W_mRNA
21S_RRNA	1625.18	1.08058	0.239031	4.52066	6.16463e-06	0.000117659	TRUE	UP	Q0158		AI1	36.0788	1.66239	0.439623	3.7814	0.000155952	0.00206946	TRUE	UP	Q0050_mRNA
EGD1	77.382	1.06521	0.30232	3.52346	0.000425954	0.00374231	TRUE	UP	YPL037C		NHP6B	28.8327	1.58896	0.446861	3.55583	0.00037679	0.00443657	TRUE	UP	YBR089C-A_mRNA
TSA1	209.54	0.944352	0.24865	3.79791	0.000145921	0.00153842	TRUE	UP	YML028W		PRE10	19.2103	1.5685	0.5265	2.9791	0.00289096	0.0212937	TRUE	UP	YOR362C_mRNA
NA.14	91.3887	0.918464	0.302183	3.03943	0.00237025	0.0143381	TRUE	UP	YNL208W		ADH3	21.6482	1.56583	0.508317	3.08042	0.00206712	0.0159273	TRUE	UP	YMR083W_mRNA
NA.13	209.522	0.904932	0.283448	3.19259	0.00141005	0.00934688	TRUE	UP	ETS1-1		QCR6	15.7328	1.50373	0.567117	2.65153	0.00801281	0.0468441	TRUE	UP	YFR033C_mRNA
OLI1	1437.65	0.682646	0.25315	2.6966	0.00700513	0.034931	TRUE	UP	Q0130		GND1	19.7661	1.494	0.552043	2.70632	0.00680344	0.0412151	TRUE	UP	YHR183W_mRNA
NA.21	207.985	0.67978	0.266124	2.55437	0.0106379	0.046917	TRUE	UP	ETS1-2		CWP2	573.753	1.49354	0.244996	6.09619	1.08624e-09	8.25544e-08	TRUE	UP	YKL096W-A_mRNA
RPS3	198.56	-0.710991	0.27102	-2.62339	0.00870601	0.0404078	TRUE	DOWN	YNL178W		EFT1	46.1309	1.49171	0.378899	3.93697	8.25168e-05	0.00122096	TRUE	UP	YOR133W_mRNA
RPL7A	112.843	-0.726734	0.282424	-2.5732	0.0100763	0.0450474	TRUE	DOWN	YGL076C		GLN1	48.7464	1.484	0.362354	4.09545	4.21353e-05	0.000714165	TRUE	UP	YPR035W_mRNA
RPL38	237.259	-0.748811	0.268873	-2.785	0.00535284	0.0274504	TRUE	DOWN	YLR325C		MEO1	64.399	1.41507	0.364003	3.88752	0.000101272	0.00142291	TRUE	UP	YBR126W-A_mRNA
RPL30	118.087	-0.760462	0.283417	-2.68319	0.00729228	0.0356154	TRUE	DOWN	YGL030W		EFT2	81.9555	1.36349	0.302902	4.50143	6.74975e-06	0.000150474	TRUE	UP	YDR385W_mRNA
TMA19	127.484	-0.768956	0.27105	-2.83696	0.00455458	0.0247153	TRUE	DOWN	YKL056C		PHB2	25.455	1.33809	0.471587	2.83743	0.00454788	0.0305383	TRUE	UP	YGR231C_mRNA
RPL32	144.146	-0.793209	0.265522	-2.98735	0.00281404	0.0166585	TRUE	DOWN	YBL092W		TEF1	250.073	1.33159	0.316582	4.20615	2.59757e-05	0.000467003	TRUE	UP	YPR080W_mRNA
RPL23B	165.107	-0.849249	0.260119	-3.26485	0.00109522	0.00761583	TRUE	DOWN	YER117W		PDC1	30.5679	1.33091	0.419696	3.17114	0.00151843	0.0123845	TRUE	UP	YLR044C_mRNA
RPS6A	89.1593	-0.852266	0.294418	-2.89475	0.00379459	0.0213229	TRUE	DOWN	YPL090C		COX9	33.9946	1.30791	0.446355	2.93019	0.00338751	0.0238984	TRUE	UP	YDL067C_mRNA
RPL42A	84.4954	-0.855856	0.332852	-2.57128	0.0101323	0.0450474	TRUE	DOWN	YNL162W		TEF2	259.367	1.29493	0.322852	4.0109	6.0488e-05	0.000954112	TRUE	UP	YBR118W_mRNA
RPL37B	80.6362	-0.86629	0.306254	-2.82866	0.00467434	0.0249975	TRUE	DOWN	YDR500C		SOD1	250.957	1.28481	0.304108	4.22484	2.3911e-05	0.000439332	TRUE	UP	YJR104C_mRNA
RPL26B	126.547	-0.872988	0.275541	-3.16826	0.00153352	0.00992755	TRUE	DOWN	YGR034W		HOR7	182.068	1.27232	0.26891	4.73138	2.23003e-06	6.21436e-05	TRUE	UP	YMR251W-A_mRNA
RPL1B	73.3203	-0.878862	0.312453	-2.81279	0.00491145	0.0257676	TRUE	DOWN	YGL135W		RPL8A	46.6534	1.2048	0.366069	3.29119	0.000997648	0.00906558	TRUE	UP	YHL033C_mRNA
RPL9A	77.8423	-0.888819	0.305388	-2.91046	0.00360896	0.0203832	TRUE	DOWN	YGL147C		FPR1	84.3697	1.15962	0.31092	3.72963	0.000191758	0.00244747	TRUE	UP	YNL135C_mRNA
RPS18A	113.927	-0.909961	0.31808	-2.86079	0.00422582	0.0232735	TRUE	DOWN	YDR450W		YEF3	61.2344	1.11372	0.332478	3.34975	0.00080886	0.00781742	TRUE	UP	YLR249W_mRNA
RPS7B	73.4893	-0.918299	0.30844	-2.97723	0.00290863	0.0170363	TRUE	DOWN	YNL096C		RPL12B	425.32	1.03269	0.354776	2.91084	0.00360462	0.0248022	TRUE	UP	YDR418W_mRNA
COF1	54.316	-0.918498	0.342379	-2.68269	0.00730326	0.0356154	TRUE	DOWN	YLL050C		EGD1	77.5517	1.03118	0.303131	3.40177	0.000669503	0.00690993	TRUE	UP	YPL037C_mRNA
RPL16B	103.798	-0.939691	0.344299	-2.72928	0.00634719	0.0321564	TRUE	DOWN	YNL069C		NA.5	202.836	0.979872	0.276599	3.54257	0.000396254	0.00462784	TRUE	UP	YDR366C_mRNA
RPS21B	138.664	-0.940451	0.29709	-3.16554	0.00154794	0.00996261	TRUE	DOWN	YJL136C		PGK1	327.565	0.949389	0.294017	3.22903	0.0012421	0.0105684	TRUE	UP	YCR012W_mRNA
RPP1B	428.107	-0.970051	0.231329	-4.19339	2.74818e-05	0.000392425	TRUE	DOWN	YDL130W		TSA1	208.301	0.924313	0.250447	3.69065	0.000223682	0.00279102	TRUE	UP	YML028W_mRNA
RPS31	437.375	-0.977856	0.266847	-3.66448	0.000247841	0.00236517	TRUE	DOWN	YLR167W		NA.17	91.1406	0.880221	0.300937	2.92494	0.00344523	0.0240018	TRUE	UP	YNL208W_mRNA
RPL4B	130.198	-0.983746	0.267993	-3.67079	0.000241806	0.00232764	TRUE	DOWN	YDR012W		OLI1	1516.67	0.673594	0.256206	2.62911	0.00856095	0.0491887	TRUE	UP	Q0130_mRNA
ARO2	39.9477	-0.98441	0.369392	-2.66495	0.00770001	0.0365833	TRUE	DOWN	YGL148W		NA.21	162.495	-0.69311	0.25751	-2.69159	0.0071113	0.0424646	TRUE	DOWN	YCR024C-B_mRNA
RPL43B	96.8843	-1.00866	0.307197	-3.28341	0.00102559	0.00723139	TRUE	DOWN	YJR094W-A		RPS3	199.077	-0.73254	0.269454	-2.71861	0.00655567	0.0404468	TRUE	DOWN	YNL178W_mRNA
RPL5	53.9283	-1.01517	0.34607	-2.93341	0.00335261	0.0191306	TRUE	DOWN	YPL131W		RPL7A	112.854	-0.750553	0.284082	-2.64203	0.00824114	0.0476788	TRUE	DOWN	YGL076C_mRNA
RPS1B	106.105	-1.018	0.299806	-3.39553	0.000684948	0.00541599	TRUE	DOWN	YML063W		RPL38	235.807	-0.765332	0.269028	-2.84481	0.00444386	0.0300815	TRUE	DOWN	YLR325C_mRNA
RPL34A	87.5087	-1.03449	0.306021	-3.38047	0.000723632	0.00560182	TRUE	DOWN	YER056C-A		TMA19	127.836	-0.773893	0.271439	-2.85108	0.00435716	0.0297354	TRUE	DOWN	YKL056C_mRNA
RPP1A	438.98	-1.05564	0.23987	-4.40088	1.07813e-05	0.000180832	TRUE	DOWN	YDL081C		RPL30	118.18	-0.777869	0.28254	-2.75313	0.00590285	0.0372436	TRUE	DOWN	YGL030W_mRNA
RPS26A	111.209	-1.06379	0.302475	-3.51694	0.000436551	0.00380522	TRUE	DOWN	YGL189C		RPL32	143.235	-0.806413	0.269733	-2.98967	0.00279281	0.0208463	TRUE	DOWN	YBL092W_mRNA
RPS25B	106.192	-1.07271	0.289319	-3.70772	0.000209136	0.00203082	TRUE	DOWN	YLR333C		RPL42A	84.2168	-0.855119	0.326021	-2.6229	0.00871858	0.0499228	TRUE	DOWN	YNL162W_mRNA
RPL41B	613.995	-1.08981	0.230389	-4.73028	2.24211e-06	4.68304e-05	TRUE	DOWN	YDL133C-A		RPS6A	91.1466	-0.864	0.296496	-2.91403	0.00356792	0.0246511	TRUE	DOWN	YPL090C_mRNA
RPL1A	60.4081	-1.09625	0.371489	-2.95097	0.00316775	0.0183906	TRUE	DOWN	YPL220W		RPL23B	165.499	-0.87152	0.261558	-3.33204	0.000862125	0.00819019	TRUE	DOWN	YER117W_mRNA
RPS21A	64.2592	-1.10123	0.32873	-3.34994	0.0008083	0.006087	TRUE	DOWN	YKR057W		RPL1B	72.0852	-0.875718	0.315817	-2.77287	0.00555646	0.0357071	TRUE	DOWN	YGL135W_mRNA
RPL4A	221.504	-1.10253	0.248078	-4.44429	8.8181e-06	0.000154947	TRUE	DOWN	YBR031W		RPL26B	126.688	-0.879686	0.276072	-3.18644	0.00144038	0.0119223	TRUE	DOWN	YGR034W_mRNA
RPS9B	63.2358	-1.10591	0.338881	-3.26342	0.00110075	0.00761583	TRUE	DOWN	YBR189W		RPL37B	81.027	-0.900595	0.305609	-2.94689	0.00320989	0.0231333	TRUE	DOWN	YDR500C_mRNA
RPL13A	35.6672	-1.10752	0.407515	-2.71773	0.0065731	0.032925	TRUE	DOWN	YDL082W		RPS7B	73.3875	-0.905547	0.308357	-2.93668	0.00331741	0.0237039	TRUE	DOWN	YNL096C_mRNA
RPL40A	152.232	-1.11032	0.275126	-4.03567	5.44468e-05	0.00067722	TRUE	DOWN	YIL148W		RPL9A	78.7067	-0.913273	0.305673	-2.98775	0.00281043	0.0208846	TRUE	DOWN	YGL147C_mRNA
RPS18B	101.102	-1.1155	0.294687	-3.78539	0.000153468	0.00158774	TRUE	DOWN	YML026C		COF1	53.9336	-0.91578	0.342393	-2.67464	0.00748089	0.0440424	TRUE	DOWN	YLL050C_mRNA
RPL16A	43.8268	-1.11926	0.379675	-2.94793	0.00319912	0.0183906	TRUE	DOWN	YIL133C		HHF2	71.3001	-0.925397	0.320678	-2.88575	0.00390482	0.0267576	TRUE	DOWN	YNL030W_mRNA
RPL27B	44.8371	-1.12709	0.398134	-2.83094	0.00464117	0.0249406	TRUE	DOWN	YDR471W		RPS18A	114.375	-0.930595	0.315436	-2.95019	0.00317582	0.0229869	TRUE	DOWN	YDR450W_mRNA
NA.18	41.4878	-1.13039	0.415495	-2.72059	0.00651655	0.0327901	TRUE	DOWN	YDR524C-B		RPL16B	103.291	-0.947875	0.340708	-2.78207	0.00540135	0.0350029	TRUE	DOWN	YNL069C_mRNA
RPL35A	106.428	-1.13365	0.292855	-3.87102	0.000108379	0.00121187	TRUE	DOWN	YDL191W		RPS21B	138.621	-0.961345	0.295361	-3.25481	0.00113467	0.0098299	TRUE	DOWN	YJL136C_mRNA
RPL27A	167.986	-1.13721	0.275909	-4.12169	3.76097e-05	0.000501613	TRUE	DOWN	YHR010W		RPL43B	96.3569	-0.980893	0.307578	-3.18909	0.00142722	0.0119223	TRUE	DOWN	YJR094W-A_mRNA
RPL18A	124.95	-1.15189	0.278206	-4.14044	3.46648e-05	0.000473752	TRUE	DOWN	YOL120C		RPP1B	428.545	-0.988154	0.234536	-4.21322	2.51752e-05	0.000457532	TRUE	DOWN	YDL130W_mRNA
RPL14A	58.9497	-1.15915	0.340777	-3.40149	0.000670196	0.00533746	TRUE	DOWN	YKL006W		RPS31	438.363	-0.995747	0.262033	-3.80008	0.000144649	0.00195043	TRUE	DOWN	YLR167W_mRNA
RPL6A	122.432	-1.16572	0.274536	-4.24614	2.17484e-05	0.000329088	TRUE	DOWN	YML073C		RPS1B	107.577	-1.00007	0.297744	-3.35883	0.000782728	0.00779001	TRUE	DOWN	YML063W_mRNA
RPS25A	52.5592	-1.21568	0.36864	-3.29774	0.00097465	0.00696089	TRUE	DOWN	YGR027C		RPL4B	130.466	-1.00174	0.268817	-3.72646	0.000194184	0.00245967	TRUE	DOWN	YDR012W_mRNA
RPS30A	79.1169	-1.23442	0.339929	-3.63141	0.000281878	0.0026444	TRUE	DOWN	YLR287C-A		ARO2	39.8617	-1.00439	0.368771	-2.72362	0.00645716	0.0399866	TRUE	DOWN	YGL148W_mRNA
SSS1	23.4559	-1.25073	0.478199	-2.61549	0.00890983	0.0410966	TRUE	DOWN	YDR086C		RPL31B	41.0934	-1.04251	0.38558	-2.70373	0.0068565	0.0413401	TRUE	DOWN	YLR406C_mRNA
PHO88	32.8204	-1.25992	0.41064	-3.06819	0.00215362	0.0130992	TRUE	DOWN	YBR106W		RPL5	53.9875	-1.04306	0.343921	-3.03284	0.0024226	0.0182459	TRUE	DOWN	YPL131W_mRNA
RPS24A	203.334	-1.28481	0.263158	-4.88229	1.04862e-06	2.63823e-05	TRUE	DOWN	YER074W		RPS26A	112.577	-1.0649	0.300949	-3.53848	0.000402431	0.00462784	TRUE	DOWN	YGL189C_mRNA
CDC33	18.0091	-1.30255	0.511539	-2.54633	0.0108862	0.0478214	TRUE	DOWN	YOL139C		RPP1A	439.107	-1.07014	0.239104	-4.47561	7.61921e-06	0.000167623	TRUE	DOWN	YDL081C_mRNA
RPL33B	88.7533	-1.33846	0.306851	-4.36193	1.2892e-05	0.000203878	TRUE	DOWN	YOR234C		RPL34A	87.2416	-1.07832	0.308496	-3.49542	0.000473312	0.00534714	TRUE	DOWN	YER056C-A_mRNA
RPL31A	126.873	-1.34119	0.275853	-4.86197	1.16221e-06	2.79687e-05	TRUE	DOWN	YDL075W		RPS25B	106.862	-1.08747	0.287056	-3.78835	0.000151653	0.00202852	TRUE	DOWN	YLR333C_mRNA
RPL17B	39.8424	-1.3459	0.404997	-3.32323	0.000889809	0.00648039	TRUE	DOWN	YJL177W		RPL13A	35.4434	-1.10826	0.403956	-2.74351	0.00607855	0.0379229	TRUE	DOWN	YDL082W_mRNA
SPO24	49.2965	-1.36339	0.378641	-3.60073	0.000317326	0.00295193	TRUE	DOWN	YPR036W-A		RPS18B	98.8298	-1.12069	0.29676	-3.7764	0.00015911	0.00207839	TRUE	DOWN	YML026C_mRNA
RPS16B	82.0314	-1.39723	0.314792	-4.43857	9.0559e-06	0.000156639	TRUE	DOWN	YDL083C		RPL4A	221.364	-1.12231	0.247567	-4.53337	5.80503e-06	0.000141481	TRUE	DOWN	YBR031W_mRNA
VMA10	36.3059	-1.41285	0.418779	-3.37374	0.000741544	0.00562253	TRUE	DOWN	YHR039C-A		RPS9B	63.0755	-1.12291	0.3367	-3.33506	0.000852818	0.00814807	TRUE	DOWN	YBR189W_mRNA
MPC2	17.1473	-1.41946	0.52858	-2.68542	0.00724386	0.0356154	TRUE	DOWN	YHR162W		RPL40A	153.201	-1.12512	0.275623	-4.08209	4.46328e-05	0.000738871	TRUE	DOWN	YIL148W_mRNA
RPL26A	56.0934	-1.42023	0.359501	-3.95056	7.79687e-05	0.00090854	TRUE	DOWN	YLR344W		RPL16A	44.1878	-1.12706	0.37874	-2.97582	0.00292204	0.0214283	TRUE	DOWN	YIL133C_mRNA
RPL13B	113.927	-1.42669	0.317818	-4.48902	7.15503e-06	0.000127752	TRUE	DOWN	YMR142C		RPL14A	59.3877	-1.12752	0.3361	-3.35473	0.000794425	0.0078134	TRUE	DOWN	YKL006W_mRNA
NA.11	30.8938	-1.42887	0.42815	-3.3373	0.000845958	0.00628507	TRUE	DOWN	YDR524W-C		NA.16	52.9752	-1.12854	0.385618	-2.92658	0.00342711	0.0240018	TRUE	DOWN	YEL034C-A_mRNA
RPL20B	123.541	-1.49887	0.294242	-5.09398	3.50615e-07	1.02894e-05	TRUE	DOWN	YOR312C		RPS21A	64.2497	-1.13936	0.327639	-3.47748	0.000506149	0.00560451	TRUE	DOWN	YKR057W_mRNA
RPL20A	40.7472	-1.50556	0.378693	-3.97566	7.01832e-05	0.000844487	TRUE	DOWN	YMR242C		RPL1A	61.5284	-1.14061	0.359565	-3.1722	0.00151291	0.0123845	TRUE	DOWN	YPL220W_mRNA
RPL6B	61.5715	-1.51617	0.360355	-4.20744	2.58279e-05	0.000376204	TRUE	DOWN	YLR448W		RPL35A	106.997	-1.14209	0.2892	-3.94914	7.84309e-05	0.00117711	TRUE	DOWN	YDL191W_mRNA
TRX1	49.659	-1.54831	0.354211	-4.37115	1.23596e-05	0.000198291	TRUE	DOWN	YLR043C		RPL27B	44.6931	-1.1435	0.391764	-2.91885	0.00351329	0.0243743	TRUE	DOWN	YDR471W_mRNA
RPS19A	70.5969	-1.56314	0.346352	-4.51315	6.38731e-06	0.000118665	TRUE	DOWN	YOL121C		RPL41B	517.118	-1.15977	0.232724	-4.98346	6.24574e-07	2.24827e-05	TRUE	DOWN	YDL133C-A_mRNA
RPS7A	209.979	-1.60067	0.250893	-6.3799	1.77206e-10	1.30778e-08	TRUE	DOWN	YOR096W		RPL27A	167.98	-1.16809	0.272366	-4.2887	1.79726e-05	0.000341479	TRUE	DOWN	YHR010W_mRNA
RPL37A	107.302	-1.60581	0.333776	-4.81103	1.50152e-06	3.3922e-05	TRUE	DOWN	YLR185W		RPL18A	124.638	-1.17297	0.27722	-4.2312	2.32449e-05	0.000431839	TRUE	DOWN	YOL120C_mRNA
RPS13	140.441	-1.64275	0.297371	-5.52423	3.30926e-08	1.3568e-06	TRUE	DOWN	YDR064W		RPL6A	122.254	-1.19423	0.276059	-4.32601	1.51838e-05	0.000303945	TRUE	DOWN	YML073C_mRNA
NHP2	26.5578	-1.67633	0.439387	-3.81516	0.000136093	0.0014486	TRUE	DOWN	YDL208W		RPS25A	52.8843	-1.20007	0.363677	-3.29982	0.000967476	0.00889527	TRUE	DOWN	YGR027C_mRNA
HOM2	29.7155	-1.68392	0.429228	-3.92313	8.74051e-05	0.000997499	TRUE	DOWN	YDR158W		NA.9	5439.15	-1.21221	0.355283	-3.41195	0.000645001	0.0066984	TRUE	DOWN	YLR154W-B_mRNA
RPS20	102.312	-1.68922	0.328751	-5.13828	2.77258e-07	8.98954e-06	TRUE	DOWN	YHL015W		RPS19B	106.101	-1.24078	0.287734	-4.31225	1.61602e-05	0.000317882	TRUE	DOWN	YNL302C_mRNA
PCL5	15.7926	-1.69	0.594144	-2.84443	0.00444916	0.0242622	TRUE	DOWN	YHR071W		RPS30A	78.5028	-1.26568	0.335545	-3.77202	0.000161931	0.00209883	TRUE	DOWN	YLR287C-A_mRNA
RPL25	88.8278	-1.70524	0.363613	-4.6897	2.736e-06	5.50683e-05	TRUE	DOWN	YOL127W		SSS1	23.4376	-1.2706	0.474544	-2.67752	0.00741684	0.043975	TRUE	DOWN	YDR086C_mRNA
RPL17A	38.2261	-1.72791	0.450476	-3.83575	0.000125181	0.00137204	TRUE	DOWN	YKL180W		RPS24A	203.419	-1.28449	0.263635	-4.87222	1.10351e-06	3.29476e-05	TRUE	DOWN	YER074W_mRNA
NOP15	10.0512	-1.75669	0.678361	-2.58961	0.00960859	0.0434152	TRUE	DOWN	YNL110C		BUD28	19.1638	-1.32931	0.496893	-2.67525	0.0074674	0.0440424	TRUE	DOWN	YLR062C_mRNA
RPS24B	31.8496	-1.76539	0.430277	-4.10291	4.07989e-05	0.000537671	TRUE	DOWN	YIL069C		VMA10	36.896	-1.3384	0.406877	-3.28945	0.00100383	0.00907249	TRUE	DOWN	YHR039C-A_mRNA
RPL35B	25.4911	-1.81023	0.479474	-3.77546	0.000159715	0.00163708	TRUE	DOWN	YDL136W		PHO88	31.886	-1.34412	0.412891	-3.25539	0.00113238	0.0098299	TRUE	DOWN	YBR106W_mRNA
RPS22A	116.081	-1.8114	0.301549	-6.00697	1.89024e-09	1.10131e-07	TRUE	DOWN	YJL190C		RPL22A	103.715	-1.35555	0.309925	-4.37381	1.22095e-05	0.000252028	TRUE	DOWN	YLR061W_mRNA
RPL11B	48.0177	-1.81444	0.375538	-4.83156	1.35465e-06	3.12416e-05	TRUE	DOWN	YGR085C		RPL17B	39.7744	-1.36132	0.406319	-3.35038	0.000807015	0.00781742	TRUE	DOWN	YJL177W_mRNA
RPL34B	57.9315	-1.82204	0.354922	-5.13362	2.84222e-07	8.98954e-06	TRUE	DOWN	YIL052C		RPL31A	127.061	-1.3646	0.276663	-4.93235	8.12441e-07	2.56302e-05	TRUE	DOWN	YDL075W_mRNA
HIS1	15.8274	-1.92891	0.626966	-3.07658	0.0020939	0.0128063	TRUE	DOWN	YER055C		RPL12A	66.9835	-1.36929	0.338267	-4.04796	5.16665e-05	0.000822727	TRUE	DOWN	YEL054C_mRNA
RPS10A	89.7088	-1.95322	0.315587	-6.18916	6.04856e-10	4.18485e-08	TRUE	DOWN	YOR293W		RPL33B	88.5453	-1.37936	0.306082	-4.50651	6.59038e-06	0.000149866	TRUE	DOWN	YOR234C_mRNA
ARO4	14.7894	-1.99134	0.587201	-3.39124	0.000695782	0.00546263	TRUE	DOWN	YBR249C		ASN1	19.2711	-1.40287	0.500396	-2.80351	0.00505492	0.0334064	TRUE	DOWN	YPR145W_mRNA
RPS28A	139.752	-1.99592	0.300587	-6.6401	3.1348e-11	3.15475e-09	TRUE	DOWN	YOR167C		SPO24	48.4273	-1.40308	0.382493	-3.66825	0.000244216	0.0029805	TRUE	DOWN	YPR036W-A_mRNA
RPS10B	52.904	-2.01388	0.376965	-5.34237	9.1741e-08	3.38524e-06	TRUE	DOWN	YMR230W		RPL26A	56.143	-1.40443	0.355745	-3.94787	7.88498e-05	0.00117711	TRUE	DOWN	YLR344W_mRNA
RPS11B	16.7825	-2.09973	0.604786	-3.47186	0.000516857	0.00430196	TRUE	DOWN	YBR048W		OPI11	120.288	-1.41074	0.316369	-4.45915	8.22858e-06	0.000178678	TRUE	DOWN	YPR044C_mRNA
GSP1	35.7297	-2.12361	0.444896	-4.77327	1.81258e-06	4.01305e-05	TRUE	DOWN	YLR293C		RPS16B	82.661	-1.41413	0.312021	-4.53215	5.83864e-06	0.000141481	TRUE	DOWN	YDL083C_mRNA
ILV2	14.9192	-2.14003	0.627158	-3.41226	0.00064426	0.00516809	TRUE	DOWN	YMR108W		RPL13B	116.301	-1.45633	0.311344	-4.67756	2.90309e-06	7.58433e-05	TRUE	DOWN	YMR142C_mRNA
RPL29	52.6958	-2.1835	0.388437	-5.62125	1.89579e-08	8.62148e-07	TRUE	DOWN	YFR032C-A		NA.11	28.6504	-1.47182	0.454248	-3.24014	0.00119473	0.010244	TRUE	DOWN	YPL142C_mRNA
NA.3	39.6847	-2.19011	0.427998	-5.11712	3.10244e-07	9.54e-06	TRUE	DOWN	YIL053W		RPS27A	67.7228	-1.47533	0.326043	-4.52494	6.04116e-06	0.000144297	TRUE	DOWN	YKL156W_mRNA
RPL36A	29.7969	-2.19332	0.472533	-4.64161	3.45697e-06	6.83369e-05	TRUE	DOWN	YMR194W		NSR1	28.954	-1.49909	0.434313	-3.45165	0.000557175	0.0060103	TRUE	DOWN	YGR159C_mRNA
RPS27B	106.764	-2.24107	0.336541	-6.65912	2.75464e-11	3.04938e-09	TRUE	DOWN	YHR021C		RPL20B	124.035	-1.5204	0.292163	-5.20394	1.95107e-07	8.36457e-06	TRUE	DOWN	YOR312C_mRNA
ATG41	7.91271	-2.33281	0.830036	-2.81049	0.00494662	0.0258298	TRUE	DOWN	YPL250C		RPL20A	42.3205	-1.52151	0.379999	-4.00399	6.22838e-05	0.000973258	TRUE	DOWN	YMR242C_mRNA
ARG1	49.4039	-2.33406	0.554036	-4.21283	2.52185e-05	0.000372226	TRUE	DOWN	YOL058W		RPL36A	54.4102	-1.52732	0.339017	-4.50514	6.63283e-06	0.000149866	TRUE	DOWN	YMR194W_mRNA
RPS30B	19.342	-2.42577	0.571633	-4.24358	2.19987e-05	0.000329088	TRUE	DOWN	YOR182C		TRX1	50.0116	-1.53039	0.355122	-4.30946	1.6365e-05	0.000318166	TRUE	DOWN	YLR043C_mRNA
OAC1	10.6244	-2.43307	0.728138	-3.34149	0.000833286	0.00623276	TRUE	DOWN	YKL120W		RPL6B	59.0387	-1.54879	0.360259	-4.2991	1.71492e-05	0.000329581	TRUE	DOWN	YLR448W_mRNA
RPL40B	117.746	-2.43687	0.306949	-7.939	2.03826e-15	3.76059e-13	TRUE	DOWN	YKR094C		RPS19A	70.5635	-1.59967	0.341221	-4.68808	2.75775e-06	7.43704e-05	TRUE	DOWN	YOL121C_mRNA
AGA2	7.45092	-2.48805	0.864143	-2.87921	0.00398672	0.0220665	TRUE	DOWN	YGL032C		RPS7A	210.471	-1.62047	0.252262	-6.42375	1.32954e-10	1.235e-08	TRUE	DOWN	YOR096W_mRNA
RPS29B	29.3999	-2.52815	0.500204	-5.05424	4.32113e-07	1.22654e-05	TRUE	DOWN	YDL061C		RPL37A	107.201	-1.62212	0.328807	-4.93336	8.08275e-07	2.56302e-05	TRUE	DOWN	YLR185W_mRNA
RPS29A	8.74173	-2.61206	0.783203	-3.3351	0.000852686	0.00629282	TRUE	DOWN	YLR388W		LHP1	22.9905	-1.62213	0.495177	-3.27586	0.00105342	0.00941882	TRUE	DOWN	YDL051W_mRNA
RPS11A	35.7698	-2.61699	0.465936	-5.61664	1.94704e-08	8.62148e-07	TRUE	DOWN	YDR025W		HOM2	33.2806	-1.62343	0.41276	-3.93312	8.38516e-05	0.00122982	TRUE	DOWN	YDR158W_mRNA
LYS20	16.9537	-2.63695	0.598576	-4.40538	1.056e-05	0.000179845	TRUE	DOWN	YDL182W		NA.12	18.9749	-1.62643	0.513595	-3.16675	0.00154151	0.0125117	TRUE	DOWN	YPR170W-B_mRNA
RPL22B	11.9263	-2.78033	0.699791	-3.97309	7.09461e-05	0.000844487	TRUE	DOWN	YFL034C-A		RPS13	141.348	-1.66352	0.295909	-5.62171	1.89073e-08	1.04178e-06	TRUE	DOWN	YDR064W_mRNA
ALD5	17.9816	-2.85226	0.589204	-4.84086	1.29278e-06	3.04491e-05	TRUE	DOWN	YER073W		NHP2	26.7115	-1.7087	0.437927	-3.90179	9.54847e-05	0.0013763	TRUE	DOWN	YDL208W_mRNA
HIS4	6.90484	-2.90755	0.902259	-3.22252	0.00127066	0.00852499	TRUE	DOWN	YCL030C		PCL5	15.8018	-1.71419	0.586033	-2.92508	0.00344371	0.0240018	TRUE	DOWN	YHR071W_mRNA
BAT1	17.7406	-3.39175	0.634869	-5.34243	9.17067e-08	3.38524e-06	TRUE	DOWN	YHR208W		RPS20	102.303	-1.74096	0.324845	-5.35935	8.35215e-08	4.10729e-06	TRUE	DOWN	YHL015W_mRNA
LEU1	38.5805	-3.92677	0.49706	-7.9	2.78908e-15	4.41072e-13	TRUE	DOWN	YGL009C		NOP15	10.6373	-1.75325	0.652934	-2.68518	0.00724908	0.0431333	TRUE	DOWN	YNL110C_mRNA
NA.10	5.9953	-4.269	1.26374	-3.37807	0.000729976	0.00561169	TRUE	DOWN	snR128		RPL25	87.8193	-1.7593	0.355303	-4.95155	7.36236e-07	2.46453e-05	TRUE	DOWN	YOL127W_mRNA
NA.1	1575.77	-5.32275	0.863446	-6.16454	7.06896e-10	4.60314e-08	TRUE	DOWN	SCR1		RPS24B	32.3329	-1.77699	0.423733	-4.19366	2.74491e-05	0.000488243	TRUE	DOWN	YIL069C_mRNA
NA.5	9.86464	-6.00119	1.37267	-4.37192	1.23158e-05	0.000198291	TRUE	DOWN	ETS2-2		RPL17A	38.5319	-1.79431	0.43846	-4.09229	4.27132e-05	0.000714165	TRUE	DOWN	YKL180W_mRNA
HIS3	7.63829	-6.63038	1.40789	-4.70944	2.48394e-06	5.09208e-05	TRUE	DOWN	YOR202W		RPL35B	27.0053	-1.79507	0.463454	-3.87324	0.000107398	0.00149642	TRUE	DOWN	YDL136W_mRNA
NA.2	11.6306	-7.21918	1.36246	-5.29863	1.16674e-07	4.16638e-06	TRUE	DOWN	ETS2-1		RPS22A	116.346	-1.80408	0.296456	-6.08548	1.16145e-09	8.44324e-08	TRUE	DOWN	YJL190C_mRNA
											RIB4	40.4211	-1.80845	0.394673	-4.58216	4.60199e-06	0.000116584	TRUE	DOWN	YOL143C_mRNA
											RPL11B	48.281	-1.81982	0.370013	-4.91825	8.73233e-07	2.70379e-05	TRUE	DOWN	YGR085C_mRNA
											RPL33A	47.601	-1.83721	0.392667	-4.67881	2.88549e-06	7.58433e-05	TRUE	DOWN	YPL143W_mRNA
											RPL34B	57.8261	-1.87672	0.353421	-5.31014	1.09539e-07	5.08748e-06	TRUE	DOWN	YIL052C_mRNA
											BUD19	53.6849	-1.91623	0.376777	-5.08585	3.65974e-07	1.3907e-05	TRUE	DOWN	YJL188C_mRNA
											RPS11B	18.9944	-1.9518	0.580782	-3.36064	0.000777626	0.00778557	TRUE	DOWN	YBR048W_mRNA
											ARO4	15.1452	-1.95547	0.576929	-3.38944	0.000700358	0.00714023	TRUE	DOWN	YBR249C_mRNA
											RPS10A	95.5235	-1.96688	0.312377	-6.29651	3.04419e-10	2.54494e-08	TRUE	DOWN	YOR293W_mRNA
											HIS1	16.4054	-2.00874	0.605627	-3.31679	0.000910584	0.00845831	TRUE	DOWN	YER055C_mRNA
											RPL21A	59.474	-2.01141	0.394501	-5.09862	3.42133e-07	1.33034e-05	TRUE	DOWN	YBR191W_mRNA
											RPS28A	140.215	-2.02127	0.297978	-6.78329	1.17473e-11	1.40296e-09	TRUE	DOWN	YOR167C_mRNA
											RPS10B	56.1299	-2.0235	0.381534	-5.3036	1.1354e-07	5.1308e-06	TRUE	DOWN	YMR230W_mRNA
											RPL29	142.198	-2.11773	0.303362	-6.98085	2.93405e-12	5.45082e-10	TRUE	DOWN	YFR032C-A_mRNA
											GSP1	36.0819	-2.1619	0.437109	-4.94591	7.57907e-07	2.48475e-05	TRUE	DOWN	YLR293C_mRNA
											ILV2	14.9355	-2.16219	0.628147	-3.44218	0.000577055	0.00618485	TRUE	DOWN	YMR108W_mRNA
											GPP1	39.6527	-2.17588	0.416822	-5.22018	1.78748e-07	7.86491e-06	TRUE	DOWN	YIL053W_mRNA
											RPS27B	106.459	-2.26734	0.33224	-6.82438	8.83031e-12	1.23036e-09	TRUE	DOWN	YHR021C_mRNA
											ATG41	7.72637	-2.3067	0.824054	-2.79921	0.00512276	0.0335892	TRUE	DOWN	YPL250C_mRNA
											NTF2	9.32883	-2.32345	0.755639	-3.07481	0.00210634	0.0160813	TRUE	DOWN	YER009W_mRNA
											RPS30B	19.0701	-2.34135	0.56211	-4.16529	3.10951e-05	0.000547274	TRUE	DOWN	YOR182C_mRNA
											ARG1	50.5897	-2.39625	0.525916	-4.55633	5.20552e-06	0.000129905	TRUE	DOWN	YOL058W_mRNA
											RPS11A	51.0495	-2.41436	0.409072	-5.90204	3.59028e-09	2.22331e-07	TRUE	DOWN	YDR025W_mRNA
											RPA14	11.0058	-2.41756	0.727174	-3.32459	0.000885477	0.00831752	TRUE	DOWN	YDR156W_mRNA
											NA.13	4089.02	-2.42567	0.790702	-3.06774	0.00215683	0.0163177	TRUE	DOWN	YLR154C-G_mRNA
											OAC1	10.6354	-2.45597	0.727262	-3.37701	0.000732771	0.00742542	TRUE	DOWN	YKL120W_mRNA
											RPL40B	117.978	-2.47216	0.305271	-8.09824	5.57598e-16	1.55885e-13	TRUE	DOWN	YKR094C_mRNA
											AGA2	7.43867	-2.50287	0.853939	-2.93098	0.00337898	0.0238984	TRUE	DOWN	YGL032C_mRNA
											RPS29B	28.8555	-2.5799	0.500335	-5.15634	2.51822e-07	1.00249e-05	TRUE	DOWN	YDL061C_mRNA
											RPS29A	8.77581	-2.61226	0.778454	-3.35571	0.000791626	0.0078134	TRUE	DOWN	YLR388W_mRNA
											LYS20	16.7645	-2.63926	0.595954	-4.42863	9.4833e-06	0.000203283	TRUE	DOWN	YDL182W_mRNA
											RPL22B	12.1529	-2.82735	0.690605	-4.09402	4.23952e-05	0.000714165	TRUE	DOWN	YFL034C-A_mRNA
											ALD5	16.8584	-2.86289	0.597971	-4.78767	1.68727e-06	4.86399e-05	TRUE	DOWN	YER073W_mRNA
											HIS4	6.91686	-2.92852	0.896815	-3.26547	0.00109283	0.00956958	TRUE	DOWN	YCL030C_mRNA
											BAT1	17.7818	-3.4132	0.631539	-5.40458	6.49602e-08	3.29132e-06	TRUE	DOWN	YHR208W_mRNA
											LEU1	38.5511	-3.94141	0.495447	-7.95527	1.78748e-15	3.73583e-13	TRUE	DOWN	YGL009C_mRNA
											NA.20	2.93661	-4.22339	1.56048	-2.70648	0.00680015	0.0412151	TRUE	DOWN	YOR203W_mRNA
											NA.18	3.02699	-4.29386	1.5558	-2.75991	0.0057818	0.0366181	TRUE	DOWN	YOL118C_mRNA
											HIS3	208.062	-4.30856	0.391202	-11.0136	3.28471e-28	5.49203e-25	TRUE	DOWN	YOR202W_mRNA
											NA.14	3.4933	-4.4975	1.5082	-2.98203	0.00286341	0.0211842	TRUE	DOWN	YOL013W-A_mRNA
5 hour post-sequencing initiation											5 hour post-sequencing initiation
gene name	gene base mean	log 2 fold change	lfcSE	stat	p-value	p-adjusted	significance	significance_reg	gene ID		transcript name	transcript base mean	log 2 fold change	lfcSE	stat	p-value	p-adjusted	significance	significance_reg	gene ID
HXT6	20.5595	7.60239	1.25712	6.04747	1.47141e-09	6.63033e-08	TRUE	UP	YDR343C		HXT6	18.6683	7.44855	1.25612	5.92983	3.03248e-09	1.28514e-07	TRUE	UP	YDR343C_mRNA
URA3	204.027	6.88334	0.560762	12.275	1.23407e-34	2.72482e-31	TRUE	UP	YEL021W		HXT4	9.14045	6.41456	1.30266	4.92421	8.47014e-07	1.79479e-05	TRUE	UP	YHR092C_mRNA
NA.7	9.91264	6.55368	1.32182	4.95807	7.11978e-07	1.87149e-05	TRUE	UP	YNL194C		URA3	202.745	6.11494	0.469551	13.0229	9.06271e-39	2.22761e-35	TRUE	UP	YEL021W_mRNA
HXT4	9.19263	6.43699	1.31359	4.9003	9.56903e-07	2.27187e-05	TRUE	UP	YHR092C		HygR	148.417	5.86942	0.497603	11.7954	4.12298e-32	5.06715e-29	TRUE	UP	HygR
HygR	147.701	5.99762	0.516452	11.6131	3.53485e-31	3.90247e-28	TRUE	UP	HygR		NA.7	10.2681	5.60577	1.30272	4.30313	1.68402e-05	0.000231247	TRUE	UP	YNL194C_mRNA
MPC3	5.05603	5.56395	1.40748	3.95312	7.71394e-05	0.000882507	TRUE	UP	YGR243W		MPC3	5.0825	5.55674	1.38587	4.00958	6.0827e-05	0.000688999	TRUE	UP	YGR243W_mRNA
TMA10	125.614	5.34368	0.461807	11.5712	5.76439e-31	4.24259e-28	TRUE	UP	YLR327C		EGO4	8.39541	5.29115	1.33201	3.97229	7.11835e-05	0.000795314	TRUE	UP	YNR034W-A_mRNA
EGO4	7.83638	5.2045	1.35051	3.85373	0.000116334	0.00126535	TRUE	UP	YNR034W-A		TMA10	124.149	5.21927	0.450906	11.5751	5.51313e-31	4.51709e-28	TRUE	UP	YLR327C_mRNA
AIM17	32.871	5.09178	0.751639	6.77423	1.25067e-11	1.06211e-09	TRUE	UP	YHL021C		AIM17	32.6421	5.05468	0.742506	6.80759	9.92455e-12	8.41191e-10	TRUE	UP	YHL021C_mRNA
HXK1	12.7773	5.06853	1.17883	4.29963	1.71083e-05	0.000238818	TRUE	UP	YFR053C		RGI1	12.1525	4.93198	1.13971	4.32739	1.50884e-05	0.000215231	TRUE	UP	YER067W_mRNA
ENT1	6.50277	4.9237	1.35965	3.62131	0.000293119	0.00276584	TRUE	UP	YDL161W		DDR2	17.5197	4.8528	0.938276	5.17204	2.31548e-07	6.25435e-06	TRUE	UP	YOL052C-A_mRNA
SDP1	10.3875	4.68737	1.15902	4.04426	5.24878e-05	0.000633295	TRUE	UP	YIL113W		GDB1	5.2638	4.61903	1.37895	3.34967	0.000809081	0.00619539	TRUE	UP	YPR184W_mRNA
GDB1	5.25584	4.63027	1.39712	3.31416	0.000919189	0.00728773	TRUE	UP	YPR184W		GLC3	5.05105	4.54387	1.38014	3.29232	0.000993657	0.00735665	TRUE	UP	YEL011W_mRNA
NA.11	13.9941	4.56457	0.977231	4.67092	2.99848e-06	5.56357e-05	TRUE	UP	YGR161W-C		NA.5	13.8964	4.53757	0.968074	4.68722	2.76944e-06	4.96883e-05	TRUE	UP	YGR161W-C_mRNA
GLC3	4.98755	4.54122	1.39967	3.24449	0.0011766	0.00895839	TRUE	UP	YEL011W		TSL1	8.99056	4.50611	1.17854	3.82348	0.00013158	0.00133646	TRUE	UP	YML100W_mRNA
TSL1	8.75912	4.48087	1.20102	3.73089	0.000190808	0.00190635	TRUE	UP	YML100W		MSC1	56.1913	4.44193	0.52046	8.53462	1.40618e-17	3.14217e-15	TRUE	UP	YML128C_mRNA
MSC1	57.0677	4.48051	0.524625	8.54039	1.33766e-17	3.28173e-15	TRUE	UP	YML128C		AGP2	4.73446	4.42761	1.38956	3.18634	0.00144085	0.00986523	TRUE	UP	YBR132C_mRNA
ACH1	4.72779	4.46576	1.4199	3.14512	0.00166018	0.0117035	TRUE	UP	YBL015W		ACH1	4.64897	4.42506	1.40178	3.15675	0.00159541	0.0107734	TRUE	UP	YBL015W_mRNA
NA.21	8.62546	4.44277	1.18369	3.75332	0.000174506	0.00178127	TRUE	UP	YOR062C		NA.16	8.58989	4.42009	1.17084	3.77513	0.000159926	0.00158724	TRUE	UP	YOR062C_mRNA
AGP2	4.52553	4.37633	1.41546	3.0918	0.00198949	0.0134336	TRUE	UP	YBR132C		HXT7	37.9217	4.37758	0.589495	7.42599	1.11942e-13	1.37576e-11	TRUE	UP	YDR342C_mRNA
PGM2	8.22959	4.34831	1.19924	3.6259	0.000287962	0.00272884	TRUE	UP	YMR105C		GPH1	16.3125	4.33425	0.848467	5.10833	3.25023e-07	8.23614e-06	TRUE	UP	YPR160W_mRNA
YAP1801	4.11881	4.26647	1.43604	2.971	0.00296834	0.0189974	TRUE	UP	YHR161C		PGM2	8.10765	4.31617	1.18351	3.64692	0.000265399	0.0024072	TRUE	UP	YMR105C_mRNA
HXT7	36.271	4.16021	0.577571	7.20294	5.89271e-13	7.22839e-11	TRUE	UP	YDR342C		HXK1	23.2217	4.26584	0.721418	5.91313	3.35676e-09	1.37515e-07	TRUE	UP	YFR053C_mRNA
DDR2	18.1125	4.15163	0.780228	5.32105	1.03171e-07	3.20847e-06	TRUE	UP	YOL052C-A		RME1	26.4371	4.24467	0.671853	6.31786	2.65215e-10	1.31005e-08	TRUE	UP	YGR044C_mRNA
TUB4	6.71781	4.01543	1.20763	3.32505	0.000884036	0.00712391	TRUE	UP	YLR212C		UIP4	7.24628	4.14039	1.19998	3.45039	0.000559783	0.00458649	TRUE	UP	YPL186C_mRNA
COQ3	6.29966	4.01066	1.24704	3.21613	0.00129932	0.00958112	TRUE	UP	YOL096C		SDP1	10.4545	4.05599	0.987914	4.10561	4.03242e-05	0.000481151	TRUE	UP	YIL113W_mRNA
EMI2	36.8312	3.91809	0.545073	7.18818	6.566e-13	7.63039e-11	TRUE	UP	YDR516C		TUB4	6.8585	4.03492	1.1886	3.39469	0.000687064	0.0054705	TRUE	UP	YLR212C_mRNA
GOR1	11.834	3.85872	0.899922	4.28784	1.8042e-05	0.000245906	TRUE	UP	YNL274C		TPO4	15.7243	3.96807	0.804387	4.93303	8.09636e-07	1.76114e-05	TRUE	UP	YOR273C_mRNA
RTC3	67.3441	3.74044	0.429938	8.69995	3.32016e-18	9.16364e-16	TRUE	UP	YHR087W		COQ3	6.19794	3.96598	1.23005	3.22425	0.00126304	0.00889558	TRUE	UP	YOL096C_mRNA
MIG1	8.00063	3.73915	1.04393	3.5818	0.000341229	0.00308785	TRUE	UP	YGL035C		ENT1	12.6603	3.95628	0.875708	4.51781	6.24816e-06	0.000102386	TRUE	UP	YDL161W_mRNA
HSP26	18.559	3.73205	0.714993	5.2197	1.79216e-07	5.2586e-06	TRUE	UP	YBR072W		EMI2	36.3851	3.88371	0.540243	7.18882	6.53524e-13	7.30164e-11	TRUE	UP	YDR516C_mRNA
HSP30	19.7504	3.72192	0.720614	5.16492	2.40538e-07	6.7229e-06	TRUE	UP	YCR021C		ALT2	5.46423	3.78544	1.25755	3.01018	0.00261097	0.0157465	TRUE	UP	YDR111C_mRNA
PML39	5.38389	3.71609	1.25614	2.95835	0.00309291	0.0195677	TRUE	UP	YML107C		NA.31	5.68987	3.74764	1.23129	3.04366	0.00233721	0.0142985	TRUE	UP	YER053C-A_mRNA
TPO4	15.9417	3.71229	0.763722	4.86079	1.16916e-06	2.68906e-05	TRUE	UP	YOR273C		NA.10	10.9152	3.73373	0.900062	4.14831	3.3494e-05	0.000420042	TRUE	UP	YKL018C-A_mRNA
PDE1	10.473	3.71183	0.914434	4.05916	4.92496e-05	0.00060079	TRUE	UP	YGL248W		HSP26	18.7363	3.72892	0.704136	5.29575	1.18532e-07	3.38781e-06	TRUE	UP	YBR072W_mRNA
SED1	130.631	3.67761	0.458928	8.01349	1.115e-15	2.05159e-13	TRUE	UP	YDR077W		MIG1	8.03018	3.72717	1.02458	3.63774	0.000275036	0.00244941	TRUE	UP	YGL035C_mRNA
PTR2	4.91423	3.65244	1.3041	2.80073	0.00509871	0.0285735	TRUE	UP	YKR093W		HSP30	19.0761	3.65082	0.714393	5.11037	3.21525e-07	8.23614e-06	TRUE	UP	YCR021C_mRNA
TFS1	56.3388	3.59678	0.491785	7.31372	2.59841e-13	3.37487e-11	TRUE	UP	YLR178C		TFS1	56.8735	3.62784	0.970509	3.73808	0.000185433	0.00180156	TRUE	UP	YLR178C_mRNA
PEX22	4.94239	3.55186	1.28042	2.77398	0.00553759	0.0307985	TRUE	UP	YAL055W		SED1	128.777	3.60579	0.451596	7.98454	1.41049e-15	2.66692e-13	TRUE	UP	YDR077W_mRNA
ATG20	4.72556	3.53041	1.28501	2.74738	0.00600744	0.0330784	TRUE	UP	YDL113C		PTR2	4.82755	3.60573	1.28276	2.81093	0.00493992	0.026962	TRUE	UP	YKR093W_mRNA
HSP42	30.8027	3.51969	0.557807	6.30988	2.79258e-10	1.56523e-08	TRUE	UP	YDR171W		RTC3	66.8524	3.59142	0.41973	8.5565	1.16342e-17	2.85968e-15	TRUE	UP	YHR087W_mRNA
OM45	16.3085	3.50778	0.715277	4.90409	9.38625e-07	2.27187e-05	TRUE	UP	YIL136W		EIS1	4.62739	3.54621	1.29707	2.73401	0.00625685	0.032566	TRUE	UP	YMR031C_mRNA
YJU3	13.5955	3.48526	0.798304	4.36583	1.2664e-05	0.000191522	TRUE	UP	YKL094W		MSN4	7.34624	3.52479	1.03778	3.39649	0.00068256	0.00546493	TRUE	UP	YKL062W_mRNA
NA.6	18.1968	3.47309	0.684654	5.07277	3.92061e-07	1.04298e-05	TRUE	UP	YLR177W		PEX22	4.86283	3.51863	1.26166	2.7889	0.00528879	0.028634	TRUE	UP	YAL055W_mRNA
COX5A	35.9564	3.43933	0.512796	6.707	1.98665e-11	1.42948e-09	TRUE	UP	YNL052W		PDE1	11.6164	3.51453	0.830644	4.23109	2.32558e-05	0.000305684	TRUE	UP	YGL248W_mRNA
TDH1	187.811	3.37945	0.330046	10.2393	1.32123e-24	4.16755e-22	TRUE	UP	YJL052W		HSP42	30.4961	3.4907	0.550064	6.34599	2.20996e-10	1.16908e-08	TRUE	UP	YDR171W_mRNA
NA.1	41.2051	3.37561	0.474304	7.11698	1.10318e-12	1.15991e-10	TRUE	UP	YER062C		COX5A	35.0538	3.48251	0.517568	6.7286	1.71305e-11	1.31584e-09	TRUE	UP	YNL052W_mRNA
DFG5	8.74738	3.36372	0.925961	3.63267	0.0002805	0.00268114	TRUE	UP	YMR238W		NA.2	18.0365	3.44403	0.674615	5.10518	3.30481e-07	8.28901e-06	TRUE	UP	YLR177W_mRNA
NA.23	8.56654	3.32853	0.928067	3.58652	0.000335125	0.00305169	TRUE	UP	YJL144W		YJU3	15.3524	3.42088	0.734955	4.65455	3.24695e-06	5.73974e-05	TRUE	UP	YKL094W_mRNA
GGA1	8.54086	3.32612	0.941368	3.53328	0.000410441	0.00361058	TRUE	UP	YDR358W		GPP2	40.4385	3.33804	0.471804	7.07505	1.49391e-12	1.59653e-10	TRUE	UP	YER062C_mRNA
STF2	23.4317	3.32536	0.596082	5.5787	2.42324e-08	8.62984e-07	TRUE	UP	YGR008C		TDH1	186.832	3.3329	0.33127	10.061	8.21979e-24	2.52553e-21	TRUE	UP	YJL052W_mRNA
PRE2	29.0851	3.30652	0.546491	6.05045	1.44443e-09	6.63033e-08	TRUE	UP	YPR103W		DFG5	8.62646	3.32442	0.912451	3.64339	0.000269071	0.00243153	TRUE	UP	YMR238W_mRNA
MSN4	8.49776	3.30391	0.946598	3.4903	0.000482472	0.00416132	TRUE	UP	YKL062W		NA.18	8.62286	3.32024	0.912435	3.63888	0.000273831	0.00244755	TRUE	UP	YJL144W_mRNA
NA.17	11.9004	3.28415	0.811339	4.04782	5.16975e-05	0.000627187	TRUE	UP	YNL134C		STF2	23.0224	3.28322	0.588024	5.58348	2.35754e-08	7.72645e-07	TRUE	UP	YGR008C_mRNA
HXT2	12.1432	3.25832	0.792777	4.11001	3.95638e-05	0.000485316	TRUE	UP	YMR011W		OM45	16.2438	3.28245	0.681414	4.81712	1.45647e-06	2.84128e-05	TRUE	UP	YIL136W_mRNA
ALD4	28.1952	3.18713	0.552122	5.77251	7.80991e-09	2.97315e-07	TRUE	UP	YOR374W		PRE2	28.9225	3.28212	0.53746	6.10673	1.01695e-09	4.71634e-08	TRUE	UP	YPR103W_mRNA
HAP2	5.77358	3.18127	1.11233	2.86001	0.00423623	0.0248106	TRUE	UP	YGL237C		HXT2	12.109	3.23773	0.781821	4.14127	3.45387e-05	0.000428769	TRUE	UP	YMR011W_mRNA
HEM3	7.76775	3.17471	0.959578	3.30845	0.000938153	0.00737168	TRUE	UP	YDL205C		NA.12	11.6666	3.23582	0.799431	4.04766	5.17327e-05	0.000594201	TRUE	UP	YNL134C_mRNA
SSA4	5.73721	3.1708	1.08334	2.92687	0.00342392	0.0211857	TRUE	UP	YER103W		HAP2	5.94709	3.21062	1.07776	2.97898	0.00289207	0.0172123	TRUE	UP	YGL237C_mRNA
RME1	14.6641	3.16095	0.716382	4.41238	1.0224e-05	0.000157864	TRUE	UP	YGR044C		HEM3	7.79477	3.16574	0.938707	3.37245	0.000745027	0.00583209	TRUE	UP	YDL205C_mRNA
GSY1	7.00165	3.1274	1.00772	3.10346	0.00191274	0.0130473	TRUE	UP	YFR015C		ALD4	27.8808	3.15229	0.544363	5.79079	7.00543e-09	2.64913e-07	TRUE	UP	YOR374W_mRNA
FUN14	14.7595	3.07392	0.713268	4.30963	1.63525e-05	0.00023162	TRUE	UP	YAL008W		MDH1	29.8219	3.13833	0.544013	5.76884	7.98182e-09	2.97262e-07	TRUE	UP	YKL085W_mRNA
ALD6	71.6874	3.0704	0.462882	6.63321	3.28455e-11	2.19766e-09	TRUE	UP	YPL061W		ATG20	5.45762	3.08699	1.08187	2.85337	0.00432576	0.0239475	TRUE	UP	YDL113C_mRNA
SAC6	23.7387	3.07013	0.574103	5.34771	8.90754e-08	2.89233e-06	TRUE	UP	YDR129C		NA.3	19.668	3.08185	0.612706	5.0299	4.90741e-07	1.1488e-05	TRUE	UP	YJR015W_mRNA
NA.29	7.45215	3.06173	0.963838	3.17661	0.0014901	0.0107171	TRUE	UP	YNR040W		GSY1	6.76642	3.05084	0.989778	3.08235	0.00205373	0.0129107	TRUE	UP	YFR015C_mRNA
MDH1	29.4238	3.04422	0.549901	5.53594	3.09566e-08	1.068e-06	TRUE	UP	YKL085W		YAK1	6.93871	3.02999	0.975509	3.10606	0.00189595	0.0122486	TRUE	UP	YJL141C_mRNA
NA.31	6.80597	3.01185	0.973987	3.09229	0.00198618	0.0134336	TRUE	UP	YNL115C		RPT1	37.7719	3.00851	0.474213	6.34423	2.23542e-10	1.16908e-08	TRUE	UP	YKL145W_mRNA
NA.50	5.05018	3.00779	1.12634	2.67041	0.00757595	0.0407	TRUE	UP	YHR097C		ALD6	70.8909	3.00061	0.454493	6.60211	4.05347e-11	2.84669e-09	TRUE	UP	YPL061W_mRNA
NA.8	20.0036	2.99333	0.612134	4.88999	1.00839e-06	2.36864e-05	TRUE	UP	YJR015W		NA.29	6.80105	2.99494	0.955951	3.13294	0.00173063	0.0114352	TRUE	UP	YNL115C_mRNA
INO4	5.1708	2.96421	1.1151	2.65825	0.00785482	0.0420957	TRUE	UP	YOL108C		NA.44	5.04367	2.98322	1.10564	2.69817	0.00697209	0.0354078	TRUE	UP	YHR097C_mRNA
HSP12	542.908	2.95896	0.266484	11.1037	1.20329e-28	6.64214e-26	TRUE	UP	YFL014W		SAC6	24.1048	2.96656	0.549905	5.39467	6.86482e-08	2.11929e-06	TRUE	UP	YDR129C_mRNA
NA.38	6.47251	2.94706	1.01318	2.90871	0.00362921	0.0220922	TRUE	UP	YJR085C		HER2	4.89402	2.96349	1.12429	2.63589	0.00839181	0.0410898	TRUE	UP	YMR293C_mRNA
ULA1	6.57518	2.94642	0.998663	2.95036	0.00317402	0.0199665	TRUE	UP	YPL003W		NA.9	13.2105	2.95137	0.710972	4.15117	3.30776e-05	0.000416948	TRUE	UP	YKR075C_mRNA
TMA17	30.7499	2.92777	0.499321	5.86351	4.53184e-09	1.88798e-07	TRUE	UP	YDL110C		INO4	5.08632	2.92781	1.09494	2.67393	0.00749676	0.0376062	TRUE	UP	YOL108C_mRNA
PRP40	8.0658	2.91694	0.904997	3.22315	0.00126787	0.0094897	TRUE	UP	YKL012W		TPO2	4.99959	2.91662	1.09255	2.66954	0.0075955	0.0379466	TRUE	UP	YGR138C_mRNA
PRC1	69.7528	2.9037	0.374755	7.74826	9.31591e-15	1.58227e-12	TRUE	UP	YMR297W		GLK1	70.8221	2.91594	0.373307	7.81109	5.66973e-15	9.95442e-13	TRUE	UP	YCL040W_mRNA
DDP1	14.8853	2.89867	0.684808	4.23282	2.30783e-05	0.000305131	TRUE	UP	YOR163W		HSP12	546.694	2.90954	0.269194	10.8083	3.14373e-27	1.1039e-24	TRUE	UP	YFL014W_mRNA
CPS1	11.6595	2.89179	0.800904	3.61066	0.000305419	0.00285748	TRUE	UP	YJL172W		TMA17	30.5785	2.90098	0.492519	5.89009	3.85988e-09	1.55534e-07	TRUE	UP	YDL110C_mRNA
NNR1	11.0748	2.86721	0.759912	3.77308	0.000161245	0.00166369	TRUE	UP	YNL200C		SDH4	40.4036	2.88776	0.447568	6.4521	1.10311e-10	6.45584e-09	TRUE	UP	YDR178W_mRNA
EAF3	9.79146	2.86646	0.840142	3.41188	0.000645161	0.00543708	TRUE	UP	YPR023C		FUN14	15.0276	2.88608	0.68249	4.22875	2.3499e-05	0.000307237	TRUE	UP	YAL008W_mRNA
NA.42	6.37686	2.85791	0.999643	2.85893	0.00425074	0.0248297	TRUE	UP	YER053C-A		NA.26	8.45732	2.87487	0.882779	3.25662	0.00112749	0.0081034	TRUE	UP	YNR040W_mRNA
YET3	47.6573	2.85702	0.419703	6.80725	9.94807e-12	8.78613e-10	TRUE	UP	YDL072C		PRC1	69.1652	2.8723	0.372139	7.71835	1.17841e-14	1.93102e-12	TRUE	UP	YMR297W_mRNA
SDH4	40.0773	2.83268	0.449096	6.30751	2.83556e-10	1.56523e-08	TRUE	UP	YDR178W		GPD1	11.0673	2.85651	0.770703	3.70637	0.000210248	0.00198765	TRUE	UP	YDL022W_mRNA
GAL83	6.42168	2.80786	0.999955	2.80798	0.00498526	0.0283697	TRUE	UP	YER027C		MCY1	4.75011	2.85312	1.10637	2.5788	0.00991429	0.0469544	TRUE	UP	YGR012W_mRNA
GLR1	11.9755	2.75762	0.722903	3.81464	0.000136379	0.00144772	TRUE	UP	YPL091W		EAF3	9.80098	2.84749	0.819904	3.47295	0.00051477	0.00426029	TRUE	UP	YPR023C_mRNA
NA.16	16.3934	2.72929	0.658822	4.14268	3.43265e-05	0.00043811	TRUE	UP	YKL103C		NNR1	10.8692	2.81855	0.748313	3.76654	0.000165527	0.001634	TRUE	UP	YNL200C_mRNA
GSY2	11.5719	2.70171	0.752766	3.58904	0.000331901	0.00304082	TRUE	UP	YLR258W		GSY2	10.8719	2.81155	0.76553	3.67269	0.000240012	0.00221785	TRUE	UP	YLR258W_mRNA
SNF7	8.40196	2.67426	0.86107	3.10574	0.00189802	0.0130473	TRUE	UP	YLR025W		CDC19	221.096	2.80758	0.368405	7.6209	2.51911e-14	3.4821e-12	TRUE	UP	YAL038W_mRNA
ZPS1	18.7083	2.67118	0.627607	4.25614	2.07986e-05	0.000280021	TRUE	UP	YOL154W		ARO9	7.80043	2.80179	0.873336	3.20815	0.00133593	0.009276	TRUE	UP	YHR137W_mRNA
ARC35	24.9901	2.6151	0.531099	4.92395	8.48156e-07	2.15256e-05	TRUE	UP	YNR035C		YET3	47.9949	2.7961	0.412043	6.78594	1.15331e-11	9.44945e-10	TRUE	UP	YDL072C_mRNA
CRH1	14.9821	2.59814	0.654507	3.96962	7.19879e-05	0.000832196	TRUE	UP	YGR189C		NA.14	9485.42	2.7572	0.697528	3.95281	7.72392e-05	0.000855198	TRUE	UP	YLR154W-A_mRNA
ERG10	52.547	2.59725	0.399715	6.49776	8.15258e-11	4.73708e-09	TRUE	UP	YPL028W		DDP1	16.5133	2.75155	0.618141	4.45133	8.53381e-06	0.000136209	TRUE	UP	YOR163W_mRNA
UBI4	12.3675	2.5933	0.702775	3.69008	0.00022418	0.00220977	TRUE	UP	YLL039C		SNF7	8.67317	2.71583	0.833389	3.25878	0.00111893	0.00806548	TRUE	UP	YLR025W_mRNA
RPN11	45.4817	2.5886	0.416893	6.20926	5.32357e-10	2.6121e-08	TRUE	UP	YFR004W		GGA1	9.02576	2.70893	0.833988	3.24816	0.00116154	0.00827554	TRUE	UP	YDR358W_mRNA
TIM11	62.1927	2.57395	0.381864	6.74048	1.57859e-11	1.20191e-09	TRUE	UP	YDR322C-A		SSA4	5.86964	2.70246	0.974886	2.77208	0.00556988	0.0297625	TRUE	UP	YER103W_mRNA
PUP1	28.5986	2.5684	0.540906	4.74832	2.0511e-06	4.08296e-05	TRUE	UP	YOR157C		APE1	16.2515	2.69963	0.64752	4.16918	3.05692e-05	0.000388031	TRUE	UP	YKL103C_mRNA
BCH1	9.35973	2.56811	0.822452	3.1225	0.00179322	0.012451	TRUE	UP	YMR237W		RRT15	17.4135	2.69588	0.620458	4.34499	1.39282e-05	0.000203783	TRUE	UP	YLR162W-A_mRNA
NDI1	15.8859	2.53284	0.632732	4.00302	6.25384e-05	0.000734494	TRUE	UP	YML120C		ZPS1	18.6121	2.65159	0.61338	4.32291	1.53982e-05	0.000215231	TRUE	UP	YOL154W_mRNA
MVD1	12.3823	2.4993	0.757427	3.29973	0.000967785	0.00757755	TRUE	UP	YNR043W		ULA1	6.9979	2.63838	0.910569	2.8975	0.00376146	0.0212057	TRUE	UP	YPL003W_mRNA
UBX5	8.75862	2.49873	0.823269	3.03514	0.00240427	0.0159418	TRUE	UP	YDR330W		MAK3	8.17408	2.63429	0.863823	3.04957	0.00229169	0.0141177	TRUE	UP	YPR051W_mRNA
YIF1	15.2406	2.49545	0.638683	3.90718	9.33784e-05	0.0010466	TRUE	UP	YNL263C		SEC12	8.74876	2.62002	0.85338	3.07016	0.00213942	0.0132461	TRUE	UP	YNR026C_mRNA
MHF1	23.1149	2.49541	0.526374	4.74076	2.12923e-06	4.19762e-05	TRUE	UP	YOL086W-A		MHF1	24.6563	2.59201	0.513168	5.05099	4.3952e-07	1.05916e-05	TRUE	UP	YOL086W-A_mRNA
RFS1	26.2526	2.49299	0.508365	4.90395	9.39297e-07	2.27187e-05	TRUE	UP	YBR052C		CRH1	14.9491	2.57239	0.641482	4.01007	6.07012e-05	0.000688999	TRUE	UP	YGR189C_mRNA
AHA1	21.3853	2.48016	0.547813	4.52738	5.9719e-06	9.91425e-05	TRUE	UP	YDR214W		GLR1	12.1744	2.56956	0.689227	3.72818	0.000192869	0.00186643	TRUE	UP	YPL091W_mRNA
RFA2	27.083	2.47472	0.553577	4.47042	7.80668e-06	0.000124907	TRUE	UP	YNL312W		GOR1	15.7827	2.56728	0.632659	4.05791	4.95128e-05	0.000574068	TRUE	UP	YNL274C_mRNA
TPS2	9.46501	2.44843	0.788654	3.10456	0.0019056	0.0130473	TRUE	UP	YDR074W		ERG10	51.9824	2.55921	0.396132	6.4605	1.04356e-10	6.4127e-09	TRUE	UP	YPL028W_mRNA
RPT2	17.9029	2.4433	0.608512	4.01521	5.93926e-05	0.000705048	TRUE	UP	YDL007W		APE4	7.6676	2.5522	0.847648	3.01092	0.00260455	0.0157465	TRUE	UP	YHR113W_mRNA
MRPL13	21.4199	2.44289	0.553597	4.41276	1.02063e-05	0.000157864	TRUE	UP	YKR006C		RPN11	44.8872	2.55071	0.411846	6.19336	5.88952e-10	2.83852e-08	TRUE	UP	YFR004W_mRNA
NA.37	8.70942	2.43376	0.83077	2.92952	0.00339481	0.0211744	TRUE	UP	YNL165W		RCR2	9.35339	2.54812	0.786679	3.23909	0.00119913	0.0085187	TRUE	UP	YDR003W_mRNA
FUM1	18.0596	2.39799	0.579553	4.13765	3.50877e-05	0.000442297	TRUE	UP	YPL262W		BCH1	9.32174	2.54268	0.806002	3.15468	0.00160676	0.0108203	TRUE	UP	YMR237W_mRNA
INH1	70.8282	2.37259	0.360996	6.57234	4.9529e-11	3.03778e-09	TRUE	UP	YDL181W		UBX5	9.10248	2.53808	0.80053	3.1705	0.00152179	0.0103616	TRUE	UP	YDR330W_mRNA
APE4	7.77645	2.35063	0.846092	2.77821	0.00546586	0.0305534	TRUE	UP	YHR113W		ARC35	25.1449	2.52742	0.513038	4.92638	8.3768e-07	1.79045e-05	TRUE	UP	YNR035C_mRNA
AGP1	10.4908	2.34981	0.72786	3.22838	0.00124495	0.00941387	TRUE	UP	YCL025C		NDI1	15.9639	2.52107	0.619153	4.07181	4.66491e-05	0.00054747	TRUE	UP	YML120C_mRNA
HSP82	18.0571	2.34911	0.618046	3.80087	0.000144188	0.00151604	TRUE	UP	YPL240C		HAM1	25.755	2.51971	0.499245	5.04704	4.48706e-07	1.0708e-05	TRUE	UP	YJR069C_mRNA
NTH1	10.3908	2.33196	0.760662	3.0657	0.00217158	0.014574	TRUE	UP	YDR001C		TIM11	62.1727	2.51686	0.379665	6.62918	3.37556e-11	2.51428e-09	TRUE	UP	YDR322C-A_mRNA
ZRT1	28.6005	2.32053	0.486229	4.7725	1.81954e-06	3.79721e-05	TRUE	UP	YGL255W		CPS1	11.8894	2.49143	0.740224	3.36578	0.000763267	0.00595591	TRUE	UP	YJL172W_mRNA
KTR1	33.8585	2.29957	0.443107	5.18964	2.10696e-07	5.96431e-06	TRUE	UP	YOR099W		PNS1	12.4703	2.48307	0.692694	3.58465	0.00033753	0.00294202	TRUE	UP	YOR161C_mRNA
SDH2	6.74086	2.28824	0.875288	2.61427	0.00894185	0.0465651	TRUE	UP	YLL041C		YIF1	15.1185	2.46591	0.627174	3.93178	8.43189e-05	0.00092525	TRUE	UP	YNL263C_mRNA
NA.49	7.72788	2.27837	0.845775	2.69383	0.00706369	0.0384153	TRUE	UP	YEL047C		AHA1	21.3923	2.46414	0.539097	4.57087	4.85701e-06	8.17708e-05	TRUE	UP	YDR214W_mRNA
NA.47	7.77199	2.27595	0.812003	2.80289	0.00506476	0.028528	TRUE	UP	YIR016W		VMA1	24.992	2.45515	0.502743	4.8835	1.04217e-06	2.14138e-05	TRUE	UP	YDL185W_mRNA
CIT1	13.0229	2.27493	0.670763	3.39156	0.000694966	0.00581244	TRUE	UP	YNR001C		GAL83	6.44919	2.45461	0.910712	2.69526	0.00703331	0.0356451	TRUE	UP	YER027C_mRNA
SQT1	14.8171	2.27042	0.627673	3.6172	0.000297804	0.00279809	TRUE	UP	YIR012W		RFS1	25.8121	2.45191	0.510502	4.80293	1.56357e-06	3.00255e-05	TRUE	UP	YBR052C_mRNA
NA.14	21.9823	2.27027	0.524443	4.32892	1.49845e-05	0.000217669	TRUE	UP	YLR257W		MVD1	12.1593	2.45087	0.742663	3.3001	0.000966491	0.00719889	TRUE	UP	YNR043W_mRNA
ARP3	24.2997	2.26958	0.587679	3.86194	0.000112491	0.00123064	TRUE	UP	YJR065C		PRE7	42.454	2.43757	0.417897	5.83293	5.44624e-09	2.1249e-07	TRUE	UP	YBL041W_mRNA
CAT5	11.6223	2.25248	0.74888	3.00779	0.00263155	0.0171907	TRUE	UP	YOR125C		UBI4	13.5928	2.41975	0.640253	3.77937	0.000157224	0.00157096	TRUE	UP	YLL039C_mRNA
PRE7	32.8929	2.24104	0.453753	4.9389	7.8565e-07	2.04084e-05	TRUE	UP	YBL041W		PUP1	28.9168	2.4099	0.517909	4.65314	3.26918e-06	5.73974e-05	TRUE	UP	YOR157C_mRNA
ECM14	9.7266	2.2305	0.733546	3.04071	0.00236024	0.0157444	TRUE	UP	YHR132C		RFA2	27.5345	2.40118	0.529481	4.53497	5.76105e-06	9.5038e-05	TRUE	UP	YNL312W_mRNA
TPS1	41.3682	2.21559	0.415558	5.3316	9.73509e-08	3.10502e-06	TRUE	UP	YBR126C		TPS2	9.2579	2.38765	0.776063	3.07662	0.00209363	0.0130945	TRUE	UP	YDR074W_mRNA
YRB1	246.498	2.21271	0.274253	8.06814	7.13753e-16	1.4327e-13	TRUE	UP	YDR002W		FUM1	17.6651	2.34562	0.569739	4.11702	3.8381e-05	0.000468079	TRUE	UP	YPL262W_mRNA
NA.51	7.48138	2.1976	0.844099	2.60349	0.00922805	0.0477179	TRUE	UP	YGR201C		MRPL13	21.5643	2.33505	0.529346	4.4112	1.02798e-05	0.000159923	TRUE	UP	YKR006C_mRNA
NAS2	9.65805	2.1909	0.745494	2.93885	0.0032943	0.0206057	TRUE	UP	YIL007C		SBH2	71.2491	2.32111	0.351965	6.59471	4.26099e-11	2.90931e-09	TRUE	UP	YER019C-A_mRNA
COM2	10.0226	2.1562	0.737699	2.92287	0.00346816	0.0213902	TRUE	UP	YER130C		RPT2	18.0244	2.3171	0.580698	3.9902	6.60181e-05	0.00074097	TRUE	UP	YDL007W_mRNA
HRB1	10.5977	2.15241	0.76759	2.80411	0.00504559	0.0284927	TRUE	UP	YNL004W		KTR1	33.2483	2.31199	0.439511	5.26038	1.43761e-07	4.06167e-06	TRUE	UP	YOR099W_mRNA
SPG5	28.2134	2.13389	0.492274	4.33475	1.45924e-05	0.000213378	TRUE	UP	YMR191W		INH1	70.1646	2.30935	0.357757	6.45507	1.08168e-10	6.45584e-09	TRUE	UP	YDL181W_mRNA
PUP3	44.1735	2.11954	0.395191	5.36332	8.17068e-08	2.72298e-06	TRUE	UP	YER094C		NTH1	10.3357	2.30505	0.745482	3.09203	0.00198791	0.0126916	TRUE	UP	YDR001C_mRNA
DAP1	13.681	2.11488	0.642755	3.29034	0.00100068	0.00775263	TRUE	UP	YPL170W		SDH2	6.81481	2.28863	0.849758	2.69327	0.00707543	0.0357848	TRUE	UP	YLL041C_mRNA
CIS3	18.2104	2.1078	0.559511	3.76722	0.000165075	0.00169529	TRUE	UP	YJL158C		AGP1	10.2068	2.28595	0.716992	3.18825	0.00143136	0.0098276	TRUE	UP	YCL025C_mRNA
BOS1	9.86657	2.10745	0.722173	2.91821	0.00352047	0.0216523	TRUE	UP	YLR078C		NA.49	6.69063	2.26822	0.873525	2.59663	0.00941441	0.045285	TRUE	UP	YJR085C_mRNA
MDG1	19.2582	2.10587	0.54956	3.83193	0.000127144	0.00136944	TRUE	UP	YNL173C		NA.37	9.07804	2.24761	0.77488	2.9006	0.00372452	0.0210702	TRUE	UP	YNL165W_mRNA
SBH2	24.4919	2.10206	0.493266	4.26152	2.0304e-05	0.000275039	TRUE	UP	YER019C-A		CAT5	11.7227	2.24594	0.727739	3.08619	0.00202737	0.0128435	TRUE	UP	YOR125C_mRNA
PNC1	26.8134	2.09719	0.474966	4.41546	1.00798e-05	0.000157845	TRUE	UP	YGL037C		HSP82	18.3371	2.24503	0.594743	3.77479	0.000160144	0.00158724	TRUE	UP	YPL240C_mRNA
CIT2	108.706	2.06686	0.396113	5.21786	1.81003e-07	5.2586e-06	TRUE	UP	YCR005C		CIT1	12.8549	2.23289	0.657333	3.39689	0.00068157	0.00546493	TRUE	UP	YNR001C_mRNA
GLC8	28.1267	2.06685	0.481444	4.29302	1.76256e-05	0.000243233	TRUE	UP	YMR311C		NAS2	14.3403	2.21463	0.622873	3.55551	0.000377246	0.0032422	TRUE	UP	YIL007C_mRNA
VPS60	12.7616	2.06479	0.641948	3.21644	0.0012979	0.00958112	TRUE	UP	YDR486C		NA.8	21.3341	2.19728	0.517878	4.24285	2.207e-05	0.000291656	TRUE	UP	YLR257W_mRNA
HEM12	15.2908	2.06108	0.619263	3.32829	0.000873822	0.0070674	TRUE	UP	YDR047W		NA.35	8.64262	2.19613	0.751941	2.92061	0.00349344	0.0200628	TRUE	UP	YIR016W_mRNA
HAP4	9.78902	2.05723	0.719032	2.8611	0.00422171	0.0247934	TRUE	UP	YKL109W		ECM14	9.61563	2.19014	0.718916	3.04645	0.00231558	0.0142292	TRUE	UP	YHR132C_mRNA
RER2	8.74078	2.05507	0.756977	2.71484	0.00663081	0.0361502	TRUE	UP	YBR002C		RER2	8.42662	2.18908	0.765575	2.85939	0.00424453	0.0236577	TRUE	UP	YBR002C_mRNA
BDH2	14.7863	2.0424	0.610994	3.34276	0.000829496	0.00673356	TRUE	UP	YAL061W		TPS1	41.047	2.18478	0.409719	5.33237	9.6937e-08	2.83656e-06	TRUE	UP	YBR126C_mRNA
YAP1	16.9819	2.03924	0.575385	3.54414	0.000393902	0.003507	TRUE	UP	YML007W		NA.41	7.41563	2.1822	0.803862	2.71465	0.00663464	0.0340458	TRUE	UP	YBR139W_mRNA
RPT5	24.9566	2.03583	0.490379	4.15155	3.30236e-05	0.00042641	TRUE	UP	YOR117W		PMT1	14.3122	2.17445	0.65314	3.32923	0.00087088	0.00662732	TRUE	UP	YDL095W_mRNA
SBE22	8.56254	2.02471	0.768178	2.63573	0.00839576	0.0444553	TRUE	UP	YHR103W		YRB1	245.135	2.16802	0.271045	7.99874	1.25694e-15	2.57463e-13	TRUE	UP	YDR002W_mRNA
MRPL10	15.0184	2.02129	0.618564	3.26771	0.00108423	0.00834103	TRUE	UP	YNL284C		CIS3	18.0605	2.16509	0.55414	3.90712	9.34018e-05	0.00100254	TRUE	UP	YJL158C_mRNA
LSC2	22.4737	2.02089	0.518759	3.89563	9.79451e-05	0.00108675	TRUE	UP	YGR244C		ZRT1	28.6735	2.16304	0.46994	4.60279	4.16861e-06	7.2158e-05	TRUE	UP	YGL255W_mRNA
ENT3	8.57397	2.02051	0.765183	2.64056	0.00827702	0.0439319	TRUE	UP	YJR125C		NA.46	7.40649	2.16193	0.827147	2.61372	0.00895616	0.0435064	TRUE	UP	YGR201C_mRNA
MNN5	15.344	2.00583	0.609086	3.29318	0.000990612	0.00771701	TRUE	UP	YJL186W		ARP3	24.881	2.14796	0.555748	3.86498	0.000111097	0.001167	TRUE	UP	YJR065C_mRNA
IDH1	38.3714	1.99941	0.41615	4.80455	1.55102e-06	3.3575e-05	TRUE	UP	YNL037C		RPT6	7.17241	2.14434	0.82844	2.58841	0.00964207	0.0460198	TRUE	UP	YGL048C_mRNA
BDH1	15.1774	1.98192	0.658439	3.01002	0.00261226	0.0171154	TRUE	UP	YAL060W		ENT3	8.29531	2.13945	0.769404	2.78067	0.00542476	0.0292414	TRUE	UP	YJR125C_mRNA
NA.27	15.3033	1.97315	0.589916	3.34479	0.000823449	0.00670914	TRUE	UP	YDL124W		HRB1	10.5735	2.13167	0.749377	2.84459	0.00444683	0.0245074	TRUE	UP	YNL004W_mRNA
SAH1	181.85	1.93633	0.293337	6.60103	4.083e-11	2.57579e-09	TRUE	UP	YER043C		SQT1	14.8497	2.12209	0.602454	3.5224	0.000427652	0.00363726	TRUE	UP	YIR012W_mRNA
QCR6	38.4401	1.93175	0.413563	4.67101	2.99725e-06	5.56357e-05	TRUE	UP	YFR033C		COM2	9.91644	2.11352	0.721552	2.92913	0.00339913	0.0196617	TRUE	UP	YER130C_mRNA
PMT2	16.0506	1.90159	0.588434	3.23161	0.00123096	0.00934004	TRUE	UP	YAL023C		TFA2	8.86349	2.11193	0.762458	2.7699	0.00560729	0.0298975	TRUE	UP	YKR062W_mRNA
SDD2	74.3641	1.87567	0.355422	5.2773	1.31105e-07	3.96547e-06	TRUE	UP	YMR074C		SPG5	28.1272	2.10579	0.484135	4.34959	1.3639e-05	0.000200747	TRUE	UP	YMR191W_mRNA
SEC62	35.5982	1.87316	0.434662	4.30947	1.63645e-05	0.00023162	TRUE	UP	YPL094C		NA.1	133.981	2.10286	0.299562	7.01978	2.22221e-12	2.27591e-10	TRUE	UP	YLR154W-F_mRNA
NA.12	49.4131	1.86461	0.405533	4.59794	4.26693e-06	7.47374e-05	TRUE	UP	snR30		VPS60	12.1908	2.0948	0.641002	3.26802	0.00108304	0.00785287	TRUE	UP	YDR486C_mRNA
ARC15	15.8398	1.85761	0.568643	3.26673	0.00108796	0.00834103	TRUE	UP	YIL062C		MRPL10	14.8829	2.09393	0.624026	3.35553	0.000792141	0.0061399	TRUE	UP	YNL284C_mRNA
NA.15	32.8443	1.85472	0.439394	4.22109	2.43124e-05	0.000319535	TRUE	UP	YOR052C		PUP3	43.9679	2.09341	0.390046	5.36708	8.00215e-08	2.39869e-06	TRUE	UP	YER094C_mRNA
YIP5	16.4509	1.84345	0.578586	3.18613	0.00144187	0.0104382	TRUE	UP	YGL161C		KTR3	12.0873	2.08015	0.661562	3.14431	0.0016648	0.0111501	TRUE	UP	YBR205W_mRNA
NA.22	38.1094	1.83835	0.491035	3.74383	0.00018124	0.00182629	TRUE	UP	YJL055W		FRD1	7.88263	2.07587	0.803177	2.58458	0.00974981	0.0463721	TRUE	UP	YEL047C_mRNA
KRE2	67.0791	1.83648	0.386415	4.7526	2.00817e-06	4.06792e-05	TRUE	UP	YDR483W		MDG1	19.0533	2.06426	0.539787	3.82421	0.000131193	0.00133646	TRUE	UP	YNL173C_mRNA
TPM1	218.182	1.83639	0.305883	6.00358	1.9301e-09	8.52333e-08	TRUE	UP	YNL079C		BDH1	14.9371	2.04893	0.655904	3.12383	0.00178512	0.0116698	TRUE	UP	YAL060W_mRNA
TCB3	28.9818	1.83405	0.485267	3.77946	0.000157171	0.00162926	TRUE	UP	YML072C		BOS1	10.5544	2.04189	0.687319	2.9708	0.00297027	0.0175503	TRUE	UP	YLR078C_mRNA
ADH3	50.4184	1.83285	0.381118	4.80914	1.51581e-06	3.3469e-05	TRUE	UP	YMR083W		PNC1	27.0357	2.02482	0.462445	4.37851	1.19493e-05	0.000179094	TRUE	UP	YGL037C_mRNA
GLK1	13.444	1.83177	0.629806	2.90847	0.003632	0.0220922	TRUE	UP	YCL040W		RPL10	724.689	2.02329	0.317401	6.37456	1.83487e-10	1.00225e-08	TRUE	UP	YLR075W_mRNA
BNA6	20.8304	1.82987	0.509445	3.59189	0.000328289	0.00302026	TRUE	UP	YFR047C		HEM12	15.0238	2.00731	0.607411	3.3047	0.000950773	0.00710334	TRUE	UP	YDR047W_mRNA
MGR2	17.6631	1.81749	0.625556	2.90539	0.00366793	0.0222494	TRUE	UP	YPL098C		YAP1	16.8535	2.00518	0.563476	3.5586	0.00037284	0.00321558	TRUE	UP	YML007W_mRNA
HPF1	16.1069	1.81653	0.585036	3.105	0.00190282	0.0130473	TRUE	UP	YOL155C		CIT2	109.457	2.00189	0.389147	5.14431	2.68504e-07	7.0966e-06	TRUE	UP	YCR005C_mRNA
YPS1	11.6117	1.81182	0.688998	2.62964	0.00854748	0.0451503	TRUE	UP	YLR120C		UGP1	20.763	1.99217	0.522712	3.81121	0.000138286	0.0013988	TRUE	UP	YKL035W_mRNA
PDC1	32.8986	1.80081	0.452776	3.97727	6.97114e-05	0.000810119	TRUE	UP	YLR044C		RPT5	24.5126	1.98328	0.482337	4.11182	3.92545e-05	0.000472978	TRUE	UP	YOR117W_mRNA
SUP35	20.1985	1.77919	0.573955	3.09989	0.00193594	0.0131525	TRUE	UP	YDR172W		LSC2	22.2471	1.9799	0.510165	3.88091	0.000104068	0.00110736	TRUE	UP	YGR244C_mRNA
RPN6	48.4177	1.77288	0.39355	4.50485	6.64185e-06	0.00010904	TRUE	UP	YDL097C		GLC8	27.9542	1.97771	0.469004	4.21684	2.47754e-05	0.000318838	TRUE	UP	YMR311C_mRNA
DLD1	18.8525	1.76915	0.548584	3.22493	0.00126003	0.00946305	TRUE	UP	YDL174C		IDH1	40.6234	1.95138	0.404471	4.82452	1.40339e-06	2.75963e-05	TRUE	UP	YNL037C_mRNA
TFG1	11.1756	1.76681	0.668362	2.6435	0.00820549	0.0437626	TRUE	UP	YGR186W		MPM1	8.59979	1.94435	0.737472	2.63651	0.0083764	0.0410898	TRUE	UP	YJL066C_mRNA
GLN1	120.515	1.76043	0.303215	5.80587	6.40311e-09	2.52465e-07	TRUE	UP	YPR035W		PRO3	20.5037	1.93294	0.569874	3.39187	0.000694179	0.00550417	TRUE	UP	YER023W_mRNA
CAF40	11.7042	1.75932	0.641072	2.74434	0.00606332	0.033303	TRUE	UP	YNL288W		BDH2	14.9427	1.92123	0.585824	3.27954	0.00103978	0.00762918	TRUE	UP	YAL061W_mRNA
AI1	28.8422	1.75307	0.482293	3.63486	0.00027813	0.00268114	TRUE	UP	Q0050		NA.21	15.8552	1.92058	0.562105	3.41677	0.00063369	0.00515765	TRUE	UP	YDL124W_mRNA
RPL3	48.7662	1.74153	0.392974	4.43167	9.35045e-06	0.00014747	TRUE	UP	YOR063W		MNN5	15.4949	1.90978	0.5877	3.24958	0.00115575	0.00825821	TRUE	UP	YJL186W_mRNA
KRS1	70.4508	1.73873	0.354778	4.90089	9.54053e-07	2.27187e-05	TRUE	UP	YDR037W		NA.32	12.5423	1.89373	0.625134	3.02933	0.00245099	0.0149122	TRUE	UP	YBR230W-A_mRNA
TPI1	549.725	1.73827	0.243966	7.12507	1.04024e-12	1.14843e-10	TRUE	UP	YDR050C		PRP40	12.2122	1.8811	0.675414	2.78511	0.0053509	0.0289066	TRUE	UP	YKL012W_mRNA
PST2	93.2063	1.73788	0.430163	4.04004	5.34413e-05	0.000641296	TRUE	UP	YDR032C		SAH1	180.324	1.88024	0.289274	6.49986	8.03922e-11	5.06677e-09	TRUE	UP	YER043C_mRNA
CWP1	70.9346	1.71494	0.373146	4.59588	4.30923e-06	7.47374e-05	TRUE	UP	YKL096W		MRX3	9.69017	1.86197	0.699492	2.66189	0.00777034	0.0386616	TRUE	UP	YBL095W_mRNA
CWP2	1322.28	1.70954	0.252997	6.75716	1.40724e-11	1.15081e-09	TRUE	UP	YKL096W-A		PMT2	15.8764	1.85758	0.576042	3.22472	0.00126095	0.00889558	TRUE	UP	YAL023C_mRNA
ERG13	62.1698	1.70362	0.392071	4.34517	1.39168e-05	0.000204856	TRUE	UP	YML126C		TMC1	32.1545	1.84904	0.432212	4.2781	1.88498e-05	0.000255983	TRUE	UP	YOR052C_mRNA
MBF1	31.2224	1.68738	0.442338	3.81468	0.00013636	0.00144772	TRUE	UP	YOR298C-A		BNA6	21.1978	1.84418	0.496087	3.71746	0.000201239	0.001918	TRUE	UP	YFR047C_mRNA
RHO1	63.9541	1.68726	0.347433	4.85635	1.19567e-06	2.7217e-05	TRUE	UP	YPR165W		ARC15	15.8573	1.84262	0.556577	3.31064	0.000930834	0.00697558	TRUE	UP	YIL062C_mRNA
RPL15B	19.6594	1.68511	0.528568	3.18807	0.00143224	0.0104026	TRUE	UP	YMR121C		HAP4	9.65876	1.83414	0.690413	2.65659	0.00789365	0.0391181	TRUE	UP	YKL109W_mRNA
RCR1	11.9898	1.68295	0.636861	2.64257	0.00822805	0.0437772	TRUE	UP	YBR005W		TIM17	31.7333	1.83105	0.468531	3.90805	9.30427e-05	0.00100254	TRUE	UP	YJL143W_mRNA
CDC48	27.7773	1.66463	0.458109	3.6337	0.000279388	0.00268114	TRUE	UP	YDL126C		NA.17	38.0734	1.80828	0.485421	3.72518	0.000195178	0.00188136	TRUE	UP	YJL055W_mRNA
COX9	83.8595	1.64895	0.357485	4.61263	3.9761e-06	7.08491e-05	TRUE	UP	YDL067C		SCEI	25.5326	1.80631	0.502972	3.59127	0.000329073	0.00288879	TRUE	UP	Q0160_mRNA
TIM17	15.7426	1.64167	0.61972	2.64904	0.00807199	0.0431549	TRUE	UP	YJL143W		SEC62	35.5071	1.80464	0.427818	4.21826	2.462e-05	0.000318505	TRUE	UP	YPL094C_mRNA
TOA2	19.1411	1.6351	0.519864	3.14525	0.00165944	0.0117035	TRUE	UP	YKL058W		YIP5	16.2682	1.80231	0.567168	3.17773	0.00148434	0.0101348	TRUE	UP	YGL161C_mRNA
FKS1	17.1904	1.60888	0.556574	2.89068	0.00384408	0.0231905	TRUE	UP	YLR342W		DLD1	18.6889	1.80136	0.543858	3.31219	0.0009257	0.00695832	TRUE	UP	YDL174C_mRNA
MIA40	46.4473	1.60238	0.387371	4.13656	3.52556e-05	0.000442297	TRUE	UP	YKL195W		TCB3	28.827	1.79995	0.475415	3.78605	0.000153059	0.00153798	TRUE	UP	YML072C_mRNA
CAJ1	43.0071	1.58985	0.452513	3.51338	0.000442441	0.0038613	TRUE	UP	YER048C		KRE2	66.6457	1.79918	0.390537	4.60695	4.08627e-06	7.12344e-05	TRUE	UP	YDR483W_mRNA
STH1	19.8049	1.58403	0.546653	2.89768	0.00375935	0.0227415	TRUE	UP	YIL126W		MGR2	17.519	1.79121	0.608829	2.94205	0.00326043	0.0189459	TRUE	UP	YPL098C_mRNA
YGP1	14.6546	1.58286	0.573596	2.75955	0.00578817	0.0320308	TRUE	UP	YNL160W		THP3	11.2774	1.7888	0.648407	2.75876	0.00580217	0.0306704	TRUE	UP	YPR045C_mRNA
NA.44	22.5422	1.57572	0.553793	2.84533	0.00443655	0.0256437	TRUE	UP	YLR256W-A		TPM1	217.949	1.78811	0.312814	5.71622	1.08919e-08	3.88004e-07	TRUE	UP	YNL079C_mRNA
EFT2	204.906	1.56903	0.27123	5.78488	7.25627e-09	2.81085e-07	TRUE	UP	YDR385W		DAP1	14.1721	1.78646	0.59768	2.98899	0.00279905	0.0168216	TRUE	UP	YPL170W_mRNA
APA1	25.2227	1.55891	0.525162	2.96844	0.00299317	0.0191009	TRUE	UP	YCL050C		QCR6	40.0291	1.78251	0.401615	4.43836	9.06483e-06	0.000142829	TRUE	UP	YFR033C_mRNA
EFT1	108.459	1.55328	0.317875	4.88645	1.02672e-06	2.38631e-05	TRUE	UP	YOR133W		SDD2	75.2507	1.75712	0.347796	5.05216	4.36845e-07	1.05916e-05	TRUE	UP	YMR074C_mRNA
15S_RRNA	449.017	1.5478	0.335595	4.61212	3.98578e-06	7.08491e-05	TRUE	UP	Q0020		ADH3	50.0987	1.75109	0.372707	4.69832	2.62315e-06	4.77608e-05	TRUE	UP	YMR083W_mRNA
FPR1	202.501	1.5425	0.297028	5.19312	2.06801e-07	5.93007e-06	TRUE	UP	YNL135C		GLN1	118.373	1.73214	0.300658	5.76118	8.35293e-09	3.0644e-07	TRUE	UP	YPR035W_mRNA
RPN2	19.0821	1.53433	0.53823	2.8507	0.00436225	0.0252804	TRUE	UP	YIL075C		CAF40	11.5925	1.71878	0.627545	2.7389	0.00616443	0.0321702	TRUE	UP	YNL288W_mRNA
MDH2	25.9196	1.51672	0.457547	3.3149	0.00091677	0.00728773	TRUE	UP	YOL126C		HSP104	11.0207	1.70667	0.658555	2.59154	0.00955468	0.0457805	TRUE	UP	YLL026W_mRNA
PGC1	31.7045	1.47484	0.497667	2.9635	0.00304165	0.0193543	TRUE	UP	YPL206C		PST2	94.2339	1.70209	0.432026	3.93979	8.15532e-05	0.000898914	TRUE	UP	YDR032C_mRNA
YRO2	42.7011	1.45454	0.391642	3.71396	0.000204044	0.00202941	TRUE	UP	YBR054W		KRS1	69.6203	1.69592	0.350344	4.84073	1.29366e-06	2.58521e-05	TRUE	UP	YDR037W_mRNA
NA.45	19.5387	1.4543	0.513344	2.83299	0.00461143	0.0265157	TRUE	UP	YBR085C-A		TNA1	28.3598	1.68954	0.463927	3.64182	0.000270717	0.00243745	TRUE	UP	YGR260W_mRNA
RPL18B	46.2206	1.44564	0.376378	3.84091	0.000122579	0.00132674	TRUE	UP	YNL301C		RPN6	48.4432	1.68867	0.382958	4.40954	1.03591e-05	0.000160019	TRUE	UP	YDL097C_mRNA
ORM2	29.7162	1.4403	0.484332	2.97378	0.0029416	0.0188809	TRUE	UP	YLR350W		TPI1	550.501	1.68749	0.241708	6.98152	2.92009e-12	2.76061e-10	TRUE	UP	YDR050C_mRNA
PRE10	47.7005	1.42807	0.39662	3.60059	0.000317493	0.00293316	TRUE	UP	YOR362C		MBF1	228.898	1.68744	0.285132	5.91811	3.2567e-09	1.35677e-07	TRUE	UP	YOR298C-A_mRNA
TEF1	652.976	1.41164	0.313415	4.50406	6.66684e-06	0.00010904	TRUE	UP	YPR080W		CWP1	70.4531	1.68542	0.366972	4.59278	4.37384e-06	7.46591e-05	TRUE	UP	YKL096W_mRNA
AI2	25.2663	1.38623	0.481469	2.87916	0.00398732	0.0238591	TRUE	UP	Q0055		RHO1	66.3901	1.66752	0.338997	4.91899	8.69919e-07	1.82757e-05	TRUE	UP	YPR165W_mRNA
ELO1	44.0367	1.38585	0.381931	3.62854	0.000285033	0.00271273	TRUE	UP	YJL196C		ERG13	61.6676	1.66627	0.388968	4.28382	1.83709e-05	0.000250864	TRUE	UP	YML126C_mRNA
BSD2	21.5715	1.3785	0.524395	2.62873	0.00857034	0.045163	TRUE	UP	YBR290W		YRO2	44.5511	1.6488	0.386868	4.26193	2.02672e-05	0.000272222	TRUE	UP	YBR054W_mRNA
OCH1	29.392	1.34187	0.431464	3.11005	0.00187058	0.0129475	TRUE	UP	YGL038C		HPF1	16.4892	1.64607	0.563914	2.91901	0.00351148	0.0200763	TRUE	UP	YOL155C_mRNA
RPL8A	111.535	1.3185	0.290821	4.53372	5.79551e-06	9.69431e-05	TRUE	UP	YHL033C		COX4	11.9139	1.64148	0.612225	2.68117	0.00733649	0.0369531	TRUE	UP	YGL187C_mRNA
PDB1	41.6331	1.31213	0.433441	3.02723	0.00246807	0.0163159	TRUE	UP	YBR221C		RPS2	573.045	1.64018	0.287613	5.70273	1.17906e-08	4.08187e-07	TRUE	UP	YGL123W_mRNA
TEF2	641.719	1.30495	0.35622	3.66333	0.000248955	0.00243227	TRUE	UP	YBR118W		GNA1	19.4544	1.63948	0.513098	3.19526	0.00139704	0.00964583	TRUE	UP	YFL017C_mRNA
PDA1	74.2848	1.29486	0.481592	2.68871	0.00717298	0.0388185	TRUE	UP	YER178W		CDC48	27.6714	1.63701	0.450294	3.63542	0.000277531	0.00246271	TRUE	UP	YDL126C_mRNA
EGD1	184.762	1.29407	0.27682	4.67478	2.94271e-06	5.56357e-05	TRUE	UP	YPL037C		NHP6B	68.8283	1.63358	0.358502	4.55667	5.19711e-06	8.69014e-05	TRUE	UP	YBR089C-A_mRNA
RAS2	41.8609	1.28606	0.393881	3.2651	0.00109424	0.00836011	TRUE	UP	YNL098C		SUP35	20.4305	1.62305	0.555137	2.92368	0.00345916	0.0199124	TRUE	UP	YDR172W_mRNA
YCP4	71.2649	1.26801	0.353604	3.58595	0.000335852	0.00305169	TRUE	UP	YCR004C		NA.47	11.845	1.61769	0.619252	2.61232	0.00899297	0.043599	TRUE	UP	YNL046W_mRNA
SOD1	78.1206	1.20417	0.321728	3.74282	0.000181967	0.00182629	TRUE	UP	YJR104C		EFT2	198.314	1.61537	0.271458	5.95071	2.6698e-09	1.15129e-07	TRUE	UP	YDR385W_mRNA
PHB2	71.6536	1.13878	0.329501	3.45608	0.000548096	0.0046546	TRUE	UP	YGR231C		YPS1	16.5572	1.6075	0.579303	2.77489	0.0055221	0.0296361	TRUE	UP	YLR120C_mRNA
TSA1	506.741	1.11953	0.260875	4.29142	1.77531e-05	0.000243471	TRUE	UP	YML028W		RPB2	11.8697	1.60194	0.625687	2.56029	0.0104584	0.0488858	TRUE	UP	YOR151C_mRNA
HOR7	385.467	1.10145	0.264456	4.16496	3.11402e-05	0.000406849	TRUE	UP	YMR251W-A		CWP2	1436.79	1.5967	0.252566	6.32191	2.58343e-10	1.31005e-08	TRUE	UP	YKL096W-A_mRNA
21S_RRNA	4055.71	0.956544	0.251302	3.80635	0.000141033	0.00148996	TRUE	UP	Q0158		RPL15B	19.6432	1.59088	0.518108	3.07057	0.00213652	0.0132461	TRUE	UP	YMR121C_mRNA
SIS1	47.6547	0.954172	0.367693	2.59502	0.00945843	0.0486812	TRUE	UP	YNL007C		RPL3	49.0954	1.5883	0.381001	4.16876	3.06257e-05	0.000388031	TRUE	UP	YOR063W_mRNA
OPI3	67.9856	0.933415	0.355849	2.62307	0.00871425	0.0454871	TRUE	UP	YJR073C		MIA40	46.5047	1.58082	0.381454	4.1442	3.40999e-05	0.00042547	TRUE	UP	YKL195W_mRNA
YEF3	155.68	0.89631	0.286582	3.12759	0.00176247	0.0123541	TRUE	UP	YLR249W		TOA2	20.4807	1.57229	0.503041	3.12556	0.00177465	0.0116676	TRUE	UP	YKL058W_mRNA
EFB1	545.168	0.893216	0.265384	3.36575	0.000763345	0.00624247	TRUE	UP	YAL003W		YPT32	14.5331	1.57026	0.580879	2.70325	0.00686643	0.0349438	TRUE	UP	YGL210W_mRNA
NA.41	579.677	0.79439	0.27678	2.87012	0.00410321	0.0243546	TRUE	UP	ETS1-1		CAJ1	42.3789	1.56415	0.451227	3.46643	0.000527414	0.00435028	TRUE	UP	YER048C_mRNA
NA.52	242.235	0.717061	0.276668	2.59178	0.00954811	0.0490284	TRUE	UP	YNL208W		YGP1	13.8128	1.55984	0.571885	2.72754	0.00638077	0.0330885	TRUE	UP	YNL160W_mRNA
RPS5	690.034	0.70617	0.26905	2.62468	0.00867302	0.0453792	TRUE	UP	YJR123W		COX9	81.267	1.54879	0.358156	4.32435	1.52983e-05	0.000215231	TRUE	UP	YDL067C_mRNA
RPS8B	257.004	-0.773107	0.264125	-2.92705	0.00342191	0.0211857	TRUE	DOWN	YER102W		SEC4	32.0351	1.53632	0.420429	3.65418	0.000258006	0.00234881	TRUE	UP	YFL005W_mRNA
TMA19	266.224	-0.774224	0.259232	-2.98661	0.00282091	0.0182656	TRUE	DOWN	YKL056C		FKS1	22.4883	1.53506	0.477115	3.21738	0.00129368	0.00905946	TRUE	UP	YLR342W_mRNA
RPL19B	249.212	-0.791496	0.276199	-2.86567	0.00416131	0.0246332	TRUE	DOWN	YBL027W		MDH2	25.4795	1.51604	0.45226	3.35214	0.000801889	0.00615951	TRUE	UP	YOL126C_mRNA
RPL14B	115.345	-0.798691	0.298745	-2.67349	0.00750662	0.0404259	TRUE	DOWN	YHL001W		ORM2	32.0427	1.50571	0.448106	3.36017	0.000778946	0.00605902	TRUE	UP	YLR350W_mRNA
RPS8A	194.464	-0.817029	0.277141	-2.94807	0.00319769	0.0200582	TRUE	DOWN	YBL072C		RPN2	18.8773	1.49347	0.52716	2.83306	0.00461049	0.025296	TRUE	UP	YIL075C_mRNA
RPS0B	159.166	-0.818521	0.284717	-2.87486	0.00404206	0.0241213	TRUE	DOWN	YLR048W		FPR1	204.686	1.48797	0.293	5.07841	3.80608e-07	9.44985e-06	TRUE	UP	YNL135C_mRNA
RPS17B	270.884	-0.833849	0.268708	-3.10318	0.00191456	0.0130473	TRUE	DOWN	YDR447C		RPL18B	46.6736	1.41224	0.367562	3.84219	0.000121944	0.0012626	TRUE	UP	YNL301C_mRNA
RPL7A	238.954	-0.848151	0.264591	-3.20552	0.0013482	0.00982449	TRUE	DOWN	YGL076C		APA1	25.5737	1.41051	0.490214	2.87734	0.00401042	0.0224547	TRUE	UP	YCL050C_mRNA
RPL9A	176.142	-0.877726	0.284424	-3.08597	0.00202887	0.0136578	TRUE	DOWN	YGL147C		STH1	20.5504	1.40903	0.501515	2.80955	0.00496101	0.0269782	TRUE	UP	YIL126W_mRNA
RPS1B	251.016	-0.887885	0.267511	-3.31906	0.000903223	0.00722578	TRUE	DOWN	YML063W		NA.45	17.2653	1.39722	0.533837	2.61731	0.0088626	0.0431372	TRUE	UP	YBR085C-A_mRNA
RPS3	431.38	-0.893783	0.260503	-3.431	0.000601371	0.00508746	TRUE	DOWN	YNL178W		TEF1	646.821	1.38847	0.321035	4.32498	1.52544e-05	0.000215231	TRUE	UP	YPR080W_mRNA
ARF1	91.9423	-0.909113	0.301671	-3.01359	0.00258175	0.0169658	TRUE	DOWN	YDL192W		PGC1	32.9503	1.38806	0.493889	2.81046	0.00494705	0.026962	TRUE	UP	YPL206C_mRNA
RPL30	252.38	-0.916455	0.270892	-3.3831	0.00071673	0.00597185	TRUE	DOWN	YGL030W		EFT1	111.257	1.37674	0.308468	4.46314	8.07661e-06	0.000129754	TRUE	UP	YOR133W_mRNA
RPL38	513.498	-0.934002	0.270246	-3.45611	0.000548022	0.0046546	TRUE	DOWN	YLR325C		BSD2	22.5373	1.37385	0.496809	2.76535	0.00568612	0.0302291	TRUE	UP	YBR290W_mRNA
RPS26B	117.868	-0.942629	0.329467	-2.86108	0.00422206	0.0247934	TRUE	DOWN	YER131W		ELO1	43.7267	1.35661	0.380396	3.56632	0.000362035	0.00314446	TRUE	UP	YJL196C_mRNA
RPS6A	200.485	-0.945708	0.270796	-3.49232	0.000478839	0.00414618	TRUE	DOWN	YPL090C		GND1	49.3588	1.34917	0.429535	3.141	0.00168374	0.0111896	TRUE	UP	YHR183W_mRNA
ACB1	60.416	-0.948576	0.338015	-2.80631	0.00501119	0.028444	TRUE	DOWN	YGR037C		OCH1	30.5249	1.3446	0.420985	3.19394	0.00140344	0.0096629	TRUE	UP	YGL038C_mRNA
RPL32	310.552	-0.967219	0.273421	-3.53747	0.000403978	0.00356793	TRUE	DOWN	YBL092W		MEO1	164.429	1.34153	0.356273	3.76547	0.000166239	0.00163446	TRUE	UP	YBR126W-A_mRNA
RPL26B	268.168	-0.97263	0.26348	-3.69147	0.000222959	0.00220759	TRUE	DOWN	YGR034W		PRE10	49.0055	1.33159	0.390156	3.41297	0.000642599	0.0052129	TRUE	UP	YOR362C_mRNA
RPL23B	356.901	-0.979968	0.261149	-3.75253	0.000175062	0.00178127	TRUE	DOWN	YER117W		PDB1	40.926	1.29773	0.431161	3.00985	0.00261374	0.0157465	TRUE	UP	YBR221C_mRNA
COF1	107.441	-0.989731	0.312386	-3.16829	0.00153336	0.0109215	TRUE	DOWN	YLL050C		AI1	79.2368	1.29623	0.350057	3.70291	0.000213142	0.00200729	TRUE	UP	Q0050_mRNA
RPL1B	167.148	-1.00461	0.278604	-3.60587	0.000311107	0.00288623	TRUE	DOWN	YGL135W		ATP1	37.6531	1.28811	0.415698	3.09867	0.0019439	0.012443	TRUE	UP	YBL099W_mRNA
RPL13A	78.88	-1.00514	0.336966	-2.98291	0.00285525	0.0184339	TRUE	DOWN	YDL082W		RPL8A	111.11	1.2529	0.287819	4.35308	1.34239e-05	0.000198771	TRUE	UP	YHL033C_mRNA
RPL42A	188.66	-1.00879	0.299294	-3.37055	0.000750177	0.00615759	TRUE	DOWN	YNL162W		PDA1	74.1782	1.24487	0.477345	2.60791	0.00910972	0.0440781	TRUE	UP	YER178W_mRNA
RPL42B	112.217	-1.01071	0.299449	-3.37525	0.000737495	0.00609884	TRUE	DOWN	YHR141C		EGD1	186.047	1.2345	0.273591	4.51221	6.41557e-06	0.000104434	TRUE	UP	YPL037C_mRNA
RPS4B	95.8986	-1.01949	0.307664	-3.31365	0.000920868	0.00728773	TRUE	DOWN	YHR203C		TEF2	642.179	1.23148	0.350783	3.51064	0.000447025	0.00377591	TRUE	UP	YBR118W_mRNA
RPL14A	128.986	-1.02396	0.303523	-3.37357	0.000742007	0.00611325	TRUE	DOWN	YKL006W		YCP4	70.807	1.22988	0.3527	3.48705	0.000488371	0.00408305	TRUE	UP	YCR004C_mRNA
RPL37B	166.959	-1.03087	0.288662	-3.57121	0.000355334	0.00318934	TRUE	DOWN	YDR500C		YPI1	35.5051	1.22144	0.420713	2.90326	0.00369295	0.0209637	TRUE	UP	YFR003C_mRNA
NA.32	125.473	-1.03233	0.33991	-3.03707	0.00238887	0.0158874	TRUE	DOWN	YDR524C-B		PHB2	71.1916	1.10198	0.325243	3.38818	0.000703581	0.00556078	TRUE	UP	YGR231C_mRNA
RPL4B	359.824	-1.04822	0.264526	-3.96262	7.41323e-05	0.000852522	TRUE	DOWN	YDR012W		COB	50.2977	1.09718	0.396824	2.7649	0.0056941	0.0302291	TRUE	UP	Q0105_mRNA
RPP1B	1067.87	-1.05789	0.240563	-4.39758	1.09464e-05	0.000166872	TRUE	DOWN	YDL130W		TSA1	504.101	1.07811	0.261972	4.11536	3.86574e-05	0.000468079	TRUE	UP	YML028W_mRNA
SSB2	93.4064	-1.06111	0.333191	-3.18469	0.00144909	0.0104562	TRUE	DOWN	YNL209W		HOR7	380.277	1.07427	0.264163	4.0667	4.7684e-05	0.000555485	TRUE	UP	YMR251W-A_mRNA
RPL43B	234.863	-1.06528	0.281789	-3.78042	0.000156567	0.00162926	TRUE	DOWN	YJR094W-A		RAS2	44.3499	1.07173	0.366478	2.92441	0.00345112	0.0199124	TRUE	UP	YNL098C_mRNA
RPS9B	137.046	-1.07505	0.294106	-3.65533	0.000256854	0.00249839	TRUE	DOWN	YBR189W		RPL12B	1078.29	1.04925	0.395269	2.65452	0.00794208	0.039279	TRUE	UP	YDR418W_mRNA
RPS21B	314.656	-1.07604	0.273004	-3.94146	8.09862e-05	0.000917013	TRUE	DOWN	YJL136C		AI2	61.904	1.03523	0.334068	3.09886	0.0019427	0.012443	TRUE	UP	Q0055_mRNA
RPL1A	122.822	-1.08184	0.317456	-3.40784	0.000654784	0.00549719	TRUE	DOWN	YPL220W		SOD1	655.637	1.00461	0.345375	2.90876	0.0036287	0.0206466	TRUE	UP	YJR104C_mRNA
RPP1A	1118.7	-1.08472	0.251614	-4.31107	1.62468e-05	0.00023162	TRUE	DOWN	YDL081C		PDC1	69.1583	0.9905	0.339334	2.91895	0.00351212	0.0200763	TRUE	UP	YLR044C_mRNA
RPL21B	30.9768	-1.08676	0.4173	-2.60427	0.00920707	0.0477179	TRUE	DOWN	YPL079W		PGK1	810.53	0.927201	0.316549	2.92909	0.0033996	0.0196617	TRUE	UP	YCR012W_mRNA
RPS31	976.443	-1.08795	0.275484	-3.94925	7.83975e-05	0.000892276	TRUE	DOWN	YLR167W		SIS1	48.1094	0.923668	0.358375	2.57738	0.00995536	0.0470582	TRUE	UP	YNL007C_mRNA
RPL5	111.88	-1.09043	0.305227	-3.57253	0.000353542	0.00318621	TRUE	DOWN	YPL131W		OPI3	68.5976	0.89185	0.346529	2.57366	0.0100628	0.0473839	TRUE	UP	YJR073C_mRNA
RPS18A	257.02	-1.09724	0.289844	-3.78562	0.000153324	0.00160446	TRUE	DOWN	YDR450W		NA.43	63.233	0.88389	0.326973	2.70325	0.0068665	0.0349438	TRUE	UP	YCR013C_mRNA
RPS18B	216.176	-1.12938	0.272715	-4.14127	3.45388e-05	0.000438285	TRUE	DOWN	YML026C		YEF3	155.026	0.874469	0.284155	3.07743	0.00208791	0.0130921	TRUE	UP	YLR249W_mRNA
YIH1	28.2455	-1.14167	0.440821	-2.58988	0.00960103	0.0491858	TRUE	DOWN	YCR059C		EFB1	552.452	0.841863	0.262141	3.21149	0.00132049	0.00922089	TRUE	UP	YAL003W_mRNA
RPL16B	204.247	-1.14204	0.30498	-3.74463	0.000180661	0.00182629	TRUE	DOWN	YNL069C		RPS1A	255.79	-0.691228	0.254464	-2.71641	0.00659936	0.033992	TRUE	DOWN	YLR441C_mRNA
RPS19B	45.9849	-1.14341	0.365901	-3.12491	0.00177862	0.0123886	TRUE	DOWN	YNL302C		NHP6A	158.193	-0.729562	0.283244	-2.57574	0.0100026	0.0471907	TRUE	DOWN	YPR052C_mRNA
SSS1	52.857	-1.145	0.362944	-3.15475	0.00160637	0.0114047	TRUE	DOWN	YDR086C		RPS16A	168.578	-0.737144	0.279557	-2.63683	0.00836849	0.0410898	TRUE	DOWN	YMR143W_mRNA
RPS25B	227.163	-1.15882	0.273076	-4.24357	2.19992e-05	0.000292616	TRUE	DOWN	YLR333C		ASC1	266.547	-0.738067	0.277342	-2.66122	0.0077858	0.0386616	TRUE	DOWN	YMR116C_mRNA
RPL9B	48.8908	-1.18944	0.37468	-3.17453	0.00150078	0.0107409	TRUE	DOWN	YNL067W		VMA3	144.245	-0.777538	0.293987	-2.6448	0.00817383	0.0403439	TRUE	DOWN	YEL027W_mRNA
RPL41B	1336.02	-1.19353	0.250105	-4.77212	1.82294e-06	3.79721e-05	TRUE	DOWN	YDL133C-A		TMA19	267.566	-0.797196	0.258627	-3.08242	0.00205327	0.0129107	TRUE	DOWN	YKL056C_mRNA
CDC33	36.9596	-1.19799	0.399275	-3.00042	0.00269608	0.0175086	TRUE	DOWN	YOL139C		RPS8A	295.679	-0.817964	0.262534	-3.11565	0.00183541	0.0119667	TRUE	DOWN	YBL072C_mRNA
ASN1	28.4743	-1.20447	0.425623	-2.8299	0.00465631	0.0267042	TRUE	DOWN	YPR145W		RPS8B	255.295	-0.818786	0.261993	-3.12522	0.00177672	0.0116676	TRUE	DOWN	YER102W_mRNA
RPL4A	578.241	-1.20692	0.251134	-4.80589	1.54061e-06	3.3575e-05	TRUE	DOWN	YBR031W		RPS17B	291.908	-0.825282	0.267117	-3.08959	0.00200436	0.0127635	TRUE	DOWN	YDR447C_mRNA
RPL27B	93.9172	-1.21486	0.336866	-3.60637	0.000310515	0.00288623	TRUE	DOWN	YDR471W		RPL19B	250.267	-0.831211	0.275055	-3.02198	0.00251127	0.0152412	TRUE	DOWN	YBL027W_mRNA
ARO2	100.713	-1.23086	0.298629	-4.12171	3.76078e-05	0.000466505	TRUE	DOWN	YGL148W		RPS0B	162.127	-0.832802	0.279382	-2.98087	0.00287433	0.0171483	TRUE	DOWN	YLR048W_mRNA
RPS21A	145.447	-1.23345	0.286727	-4.30181	1.69405e-05	0.000238246	TRUE	DOWN	YKR057W		ADK1	73.4297	-0.833481	0.325225	-2.56278	0.0103837	0.0488014	TRUE	DOWN	YDR226W_mRNA
RPL11A	147.947	-1.23475	0.310304	-3.97915	6.91615e-05	0.000807982	TRUE	DOWN	YPR102C		RPL14B	116.279	-0.846871	0.29241	-2.89618	0.00377735	0.0212465	TRUE	DOWN	YHL001W_mRNA
RPS26A	234.31	-1.24106	0.291857	-4.25228	2.11606e-05	0.000283168	TRUE	DOWN	YGL189C		NA.25	431.057	-0.864654	0.264267	-3.2719	0.00106829	0.00779188	TRUE	DOWN	YCR024C-B_mRNA
CMD1	24.0767	-1.25255	0.45255	-2.76776	0.00564426	0.0313129	TRUE	DOWN	YBR109C		HHF2	151.648	-0.868447	0.282687	-3.07212	0.00212546	0.0132263	TRUE	DOWN	YNL030W_mRNA
RPS7B	166.074	-1.25295	0.280066	-4.47376	7.68547e-06	0.000124254	TRUE	DOWN	YNL096C		NA.40	167.523	-0.879127	0.31856	-2.75969	0.0057857	0.0306492	TRUE	DOWN	YDR524W-C_mRNA
VMA10	77.7957	-1.27037	0.345842	-3.67326	0.00023948	0.0023501	TRUE	DOWN	YHR039C-A		GPM1	154.509	-0.886034	0.310741	-2.85136	0.00435326	0.0240457	TRUE	DOWN	YKL152C_mRNA
RPL27A	358.512	-1.28353	0.278374	-4.61081	4.01093e-06	7.08491e-05	TRUE	DOWN	YHR010W		RPS1B	255.96	-0.889825	0.267856	-3.32203	0.00089365	0.00675875	TRUE	DOWN	YML063W_mRNA
RPL35A	239.234	-1.29274	0.28334	-4.56249	5.05504e-06	8.58579e-05	TRUE	DOWN	YDL191W		RPL7A	240.694	-0.89215	0.263697	-3.38324	0.000716351	0.00562553	TRUE	DOWN	YGL076C_mRNA
NOP1	38.4948	-1.29475	0.40146	-3.22511	0.00125925	0.00946305	TRUE	DOWN	YDL014W		MMF1	163.438	-0.894033	0.349059	-2.56127	0.0104291	0.0488858	TRUE	DOWN	YIL051C_mRNA
RPL18A	279.649	-1.29921	0.274563	-4.73194	2.22382e-06	4.30719e-05	TRUE	DOWN	YOL120C		RPS3	435.518	-0.926626	0.260111	-3.56242	0.000367448	0.00318024	TRUE	DOWN	YNL178W_mRNA
RPS16B	182.272	-1.29974	0.274272	-4.73885	2.1493e-06	4.1997e-05	TRUE	DOWN	YDL083C		RPL9A	179.06	-0.927534	0.286482	-3.23767	0.00120511	0.00853647	TRUE	DOWN	YGL147C_mRNA
RPL6A	273.35	-1.30137	0.274078	-4.74818	2.05258e-06	4.08296e-05	TRUE	DOWN	YML073C		RPL30	253.11	-0.93585	0.270257	-3.46282	0.000534556	0.00439444	TRUE	DOWN	YGL030W_mRNA
RPL16A	93.872	-1.30899	0.338963	-3.86173	0.000112586	0.00123064	TRUE	DOWN	YIL133C		ADE8	40.7319	-0.948284	0.371614	-2.5518	0.0107168	0.0498901	TRUE	DOWN	YDR408C_mRNA
MET16	18.0903	-1.34005	0.499142	-2.6847	0.00725942	0.0391902	TRUE	DOWN	YPR167C		SAM1	66.0299	-0.951532	0.361091	-2.63516	0.00840972	0.0410956	TRUE	DOWN	YLR180W_mRNA
RPL34A	182.296	-1.3474	0.302537	-4.45368	8.44111e-06	0.000134086	TRUE	DOWN	YER056C-A		ARF1	90.931	-0.954547	0.298366	-3.19925	0.00137786	0.00954024	TRUE	DOWN	YDL192W_mRNA
RPS30A	172.452	-1.34949	0.294904	-4.57604	4.73849e-06	8.11053e-05	TRUE	DOWN	YLR287C-A		RPS6A	205.056	-0.957348	0.266881	-3.58718	0.000334276	0.00292402	TRUE	DOWN	YPL090C_mRNA
ATP18	24.1556	-1.3514	0.450081	-3.00257	0.00267709	0.0174367	TRUE	DOWN	YML081C-A		RPS26B	117.263	-0.967078	0.328076	-2.94773	0.00320122	0.0186902	TRUE	DOWN	YER131W_mRNA
RPS25A	111.283	-1.3516	0.313287	-4.31424	1.60152e-05	0.000231122	TRUE	DOWN	YGR027C		RPL38	511.97	-0.967185	0.273904	-3.5311	0.000413833	0.00354425	TRUE	DOWN	YLR325C_mRNA
ERV14	32.5215	-1.35645	0.42192	-3.21494	0.0013047	0.00958112	TRUE	DOWN	YGL054C		PFY1	62.4275	-0.974158	0.328664	-2.96399	0.00303675	0.0178573	TRUE	DOWN	YOR122C_mRNA
PHO88	69.293	-1.35922	0.330188	-4.11649	3.84684e-05	0.000474515	TRUE	DOWN	YBR106W		ACB1	59.2751	-0.99035	0.334493	-2.96075	0.00306889	0.0180032	TRUE	DOWN	YGR037C_mRNA
HTB2	34.7178	-1.36205	0.44788	-3.0411	0.00235716	0.0157444	TRUE	DOWN	YBL002W		RPL32	309.985	-0.994527	0.274307	-3.6256	0.000288295	0.00254902	TRUE	DOWN	YBL092W_mRNA
RPL33B	185.763	-1.36673	0.296255	-4.61336	3.96204e-06	7.08491e-05	TRUE	DOWN	YOR234C		RPL26B	270.369	-1.00121	0.266008	-3.76384	0.000167326	0.0016386	TRUE	DOWN	YGR034W_mRNA
RPO26	29.5341	-1.37606	0.427326	-3.22015	0.00128122	0.00955723	TRUE	DOWN	YPR187W		NA.48	44.004	-1.0019	0.38506	-2.60194	0.00926988	0.044765	TRUE	DOWN	YMR122W-A_mRNA
NA.43	25.2173	-1.37745	0.482005	-2.85775	0.00426651	0.0248561	TRUE	DOWN	snR11		SEC53	46.3982	-1.00503	0.367673	-2.73349	0.00626676	0.032566	TRUE	DOWN	YFL045C_mRNA
RPL40A	328.535	-1.37748	0.269959	-5.10256	3.35087e-07	9.24839e-06	TRUE	DOWN	YIL148W		RPL23B	360.253	-1.00769	0.261946	-3.84693	0.000119605	0.00124572	TRUE	DOWN	YER117W_mRNA
RPL20A	95.9125	-1.38102	0.317726	-4.34659	1.3827e-05	0.000204856	TRUE	DOWN	YMR242C		RPL13A	78.5002	-1.01447	0.33407	-3.0367	0.00239187	0.0145886	TRUE	DOWN	YDL082W_mRNA
RPS24A	412.119	-1.39227	0.263469	-5.28438	1.26134e-07	3.8681e-06	TRUE	DOWN	YER074W		COF1	108.375	-1.01684	0.310254	-3.27746	0.00104746	0.0076627	TRUE	DOWN	YLL050C_mRNA
DRE2	16.0973	-1.41674	0.54336	-2.60736	0.00912425	0.0474032	TRUE	DOWN	YKR071C		RPL42A	188.863	-1.01776	0.298815	-3.40597	0.000659282	0.00533065	TRUE	DOWN	YNL162W_mRNA
RPL17B	84.5995	-1.41768	0.341155	-4.15553	3.24538e-05	0.000421517	TRUE	DOWN	YJL177W		RPL1B	163.985	-1.02333	0.279787	-3.65752	0.000254668	0.00232704	TRUE	DOWN	YGL135W_mRNA
SPO24	110.507	-1.4401	0.347201	-4.14773	3.35783e-05	0.000431051	TRUE	DOWN	YPR036W-A		RPL14A	130.174	-1.02641	0.299989	-3.42151	0.000622741	0.00508538	TRUE	DOWN	YKL006W_mRNA
TRX1	104.799	-1.44719	0.309601	-4.67435	2.94883e-06	5.56357e-05	TRUE	DOWN	YLR043C		RPL31B	94.3733	-1.03249	0.321823	-3.20826	0.0013354	0.009276	TRUE	DOWN	YLR406C_mRNA
RPL26A	116.413	-1.45535	0.305591	-4.7624	1.91308e-06	3.91119e-05	TRUE	DOWN	YLR344W		RPL37B	168.646	-1.05874	0.285558	-3.7076	0.000209229	0.00198565	TRUE	DOWN	YDR500C_mRNA
EBP2	24.5112	-1.47324	0.458292	-3.21463	0.00130612	0.00958112	TRUE	DOWN	YKL172W		GCN4	57.0295	-1.0635	0.356603	-2.9823	0.00286087	0.0171483	TRUE	DOWN	YEL009C_mRNA
SAM4	29.6171	-1.48774	0.452724	-3.28619	0.00101551	0.00784001	TRUE	DOWN	YPL273W		SSB2	93.8642	-1.06578	0.326079	-3.26848	0.00108128	0.00785287	TRUE	DOWN	YNL209W_mRNA
RPL6B	133.434	-1.48839	0.306795	-4.85141	1.22585e-06	2.76192e-05	TRUE	DOWN	YLR448W		HMO1	28.063	-1.06772	0.411926	-2.59201	0.0095416	0.0457805	TRUE	DOWN	YDR174W_mRNA
CBF5	15.397	-1.49183	0.554476	-2.69052	0.00713414	0.0387031	TRUE	DOWN	YLR175W		RPS4B	97.1051	-1.07557	0.30528	-3.52321	0.000426349	0.00363726	TRUE	DOWN	YHR203C_mRNA
HXT1	19.5116	-1.49266	0.521411	-2.86274	0.00419999	0.0247934	TRUE	DOWN	YHR094C		RPL42B	114.148	-1.0789	0.298459	-3.61491	0.000300457	0.00264704	TRUE	DOWN	YHR141C_mRNA
SUI2	19.0643	-1.5008	0.512791	-2.92674	0.0034254	0.0211857	TRUE	DOWN	YJR007W		RPL43B	235.319	-1.08125	0.28194	-3.83503	0.000125551	0.00129123	TRUE	DOWN	YJR094W-A_mRNA
DBP2	16.9438	-1.50123	0.53173	-2.8233	0.00475317	0.0271891	TRUE	DOWN	YNL112W		RPL4B	361.865	-1.08212	0.262918	-4.11581	3.85822e-05	0.000468079	TRUE	DOWN	YDR012W_mRNA
NA.13	83.2536	-1.51283	0.347584	-4.3524	1.34654e-05	0.000200889	TRUE	DOWN	YDR524W-C		RPP1B	1076.37	-1.09484	0.244046	-4.48623	7.24956e-06	0.000117233	TRUE	DOWN	YDL130W_mRNA
RPS20	235.765	-1.51472	0.307109	-4.9322	8.13086e-07	2.08755e-05	TRUE	DOWN	YHL015W		GIS2	31.7824	-1.09514	0.401628	-2.72674	0.00639637	0.0330995	TRUE	DOWN	YNL255C_mRNA
RPL13B	255.913	-1.52032	0.314615	-4.83231	1.3496e-06	3.01002e-05	TRUE	DOWN	YMR142C		NOP56	79.0957	-1.09592	0.315072	-3.4783	0.000504607	0.00420448	TRUE	DOWN	YLR197W_mRNA
RPL31A	267.678	-1.52832	0.286761	-5.32958	9.84383e-08	3.10502e-06	TRUE	DOWN	YDL075W		RPL5	113.523	-1.09808	0.297681	-3.68877	0.00022534	0.00211406	TRUE	DOWN	YPL131W_mRNA
SRP14	17.1508	-1.5363	0.526907	-2.9157	0.00354891	0.0217667	TRUE	DOWN	YDL092W		CAF20	30.6623	-1.09973	0.400313	-2.74716	0.00601132	0.0315723	TRUE	DOWN	YOR276W_mRNA
RPL17A	81.0601	-1.55066	0.375998	-4.12411	3.72172e-05	0.000464269	TRUE	DOWN	YKL180W		RPS9B	137.795	-1.11023	0.290161	-3.82625	0.000130111	0.00133255	TRUE	DOWN	YBR189W_mRNA
MPC2	37.5652	-1.56189	0.389852	-4.00636	6.16612e-05	0.000728064	TRUE	DOWN	YHR162W		RPS31	985.591	-1.11526	0.27358	-4.07652	4.57142e-05	0.000540219	TRUE	DOWN	YLR167W_mRNA
TOM7	23.7904	-1.57489	0.475519	-3.31194	0.000926518	0.00730626	TRUE	DOWN	YNL070W		RPP1A	1126.44	-1.11663	0.251251	-4.44427	8.81901e-06	0.000139852	TRUE	DOWN	YDL081C_mRNA
RPL35B	59.1968	-1.60389	0.373131	-4.29848	1.71975e-05	0.000238818	TRUE	DOWN	YDL136W		RPS21B	315.884	-1.11911	0.274132	-4.08237	4.45787e-05	0.000529345	TRUE	DOWN	YJL136C_mRNA
RPS7A	438.897	-1.6063	0.25574	-6.28098	3.36443e-10	1.81187e-08	TRUE	DOWN	YOR096W		RPS22B	27.3445	-1.12839	0.433978	-2.60011	0.00931949	0.0449163	TRUE	DOWN	YLR367W_mRNA
NA.24	30.7933	-1.61503	0.456173	-3.54039	0.00039953	0.00354282	TRUE	DOWN	snR57		RPS18A	258.411	-1.13063	0.292943	-3.85956	0.000113592	0.00118813	TRUE	DOWN	YDR450W_mRNA
NOP15	23.3141	-1.61931	0.461891	-3.50583	0.000455179	0.00395683	TRUE	DOWN	YNL110C		RPL1A	127.553	-1.1357	0.308759	-3.67828	0.000234808	0.00218213	TRUE	DOWN	YPL220W_mRNA
NHP2	58.175	-1.62939	0.342098	-4.76293	1.90805e-06	3.91119e-05	TRUE	DOWN	YDL208W		ZUO1	26.5744	-1.14731	0.434552	-2.64021	0.00828554	0.0408134	TRUE	DOWN	YGR285C_mRNA
RPS13	295.993	-1.64116	0.277291	-5.91856	3.2478e-09	1.37907e-07	TRUE	DOWN	YDR064W		LIA1	68.008	-1.15264	0.437785	-2.6329	0.00846602	0.0412886	TRUE	DOWN	YJR070C_mRNA
RPL20B	266.649	-1.66458	0.286062	-5.81893	5.9226e-09	2.37765e-07	TRUE	DOWN	YOR312C		RPS18B	212.831	-1.16413	0.274175	-4.24594	2.17678e-05	0.000289217	TRUE	DOWN	YML026C_mRNA
NA.36	14.9062	-1.68551	0.570052	-2.95677	0.00310884	0.0196123	TRUE	DOWN	YLR264C-A		RPS25B	229.564	-1.17787	0.271237	-4.34257	1.40827e-05	0.000204824	TRUE	DOWN	YLR333C_mRNA
NA.30	58.9586	-1.6942	0.533762	-3.17408	0.00150314	0.0107409	TRUE	DOWN	snR4		CDC33	37.4414	-1.17895	0.387369	-3.04349	0.00233848	0.0142985	TRUE	DOWN	YOL139C_mRNA
RPS19A	171.76	-1.7289	0.313512	-5.51462	3.49537e-08	1.18735e-06	TRUE	DOWN	YOL121C		SSS1	52.9275	-1.18086	0.358122	-3.29736	0.000975974	0.00724757	TRUE	DOWN	YDR086C_mRNA
SNU13	28.7351	-1.75244	0.496192	-3.53178	0.000412779	0.00361673	TRUE	DOWN	YEL026W		RPL16B	203.659	-1.18192	0.303227	-3.89782	9.70643e-05	0.00103732	TRUE	DOWN	YNL069C_mRNA
ACO2	12.968	-1.75308	0.618696	-2.83352	0.00460391	0.0265157	TRUE	DOWN	YJL200C		TMA7	28.4744	-1.18543	0.436483	-2.71586	0.00661033	0.033992	TRUE	DOWN	YLR262C-A_mRNA
NA.46	10.8881	-1.80609	0.642049	-2.81301	0.00490805	0.0280025	TRUE	DOWN	snR49		SSB1	58.005	-1.19242	0.38678	-3.08295	0.00204958	0.0129107	TRUE	DOWN	YDL229W_mRNA
RPS22A	259.688	-1.80611	0.267842	-6.74319	1.54941e-11	1.20191e-09	TRUE	DOWN	YJL190C		YIH1	28.5168	-1.19606	0.434039	-2.75566	0.00585741	0.030896	TRUE	DOWN	YCR059C_mRNA
GSP1	78.3462	-1.8099	0.368183	-4.91577	8.84347e-07	2.19398e-05	TRUE	DOWN	YLR293C		NA.27	35.8805	-1.21367	0.384912	-3.15311	0.00161542	0.0108489	TRUE	DOWN	YPR002C-A_mRNA
RPL37A	231.378	-1.81457	0.304326	-5.96259	2.48271e-09	1.07487e-07	TRUE	DOWN	YLR185W		RPL9B	49.6202	-1.21956	0.363771	-3.35254	0.000800738	0.00615951	TRUE	DOWN	YNL067W_mRNA
GLY1	17.3456	-1.82377	0.567555	-3.21338	0.00131184	0.00959123	TRUE	DOWN	YEL046C		RPL11A	149.421	-1.24244	0.307775	-4.03686	5.41712e-05	0.000619315	TRUE	DOWN	YPR102C_mRNA
PCL5	36.4336	-1.82543	0.401829	-4.5428	5.55122e-06	9.35656e-05	TRUE	DOWN	YHR071W		VMA10	79.2448	-1.24588	0.335152	-3.71736	0.000201319	0.001918	TRUE	DOWN	YHR039C-A_mRNA
RPB10	14.9538	-1.82604	0.584101	-3.12624	0.00177057	0.0123716	TRUE	DOWN	YOR210W		NA.20	118.065	-1.25011	0.3579	-3.4929	0.000477813	0.00402214	TRUE	DOWN	YEL034C-A_mRNA
NA.28	17.0039	-1.82886	0.568281	-3.21822	0.00128987	0.00958112	TRUE	DOWN	YGR079W		RPL4A	583.38	-1.25132	0.249933	-5.00664	5.53898e-07	1.27241e-05	TRUE	DOWN	YBR031W_mRNA
RPB8	25.769	-1.86274	0.478034	-3.89667	9.75234e-05	0.00108675	TRUE	DOWN	YOR224C		RPS21A	145.997	-1.25353	0.284355	-4.40835	1.04162e-05	0.000160019	TRUE	DOWN	YKR057W_mRNA
RPL36A	68.2469	-1.86305	0.356935	-5.21959	1.79322e-07	5.2586e-06	TRUE	DOWN	YMR194W		RPS26A	240.119	-1.26398	0.29328	-4.3098	1.634e-05	0.000225639	TRUE	DOWN	YGL189C_mRNA
RPS24B	75.8497	-1.87125	0.336344	-5.56351	2.64399e-08	9.26654e-07	TRUE	DOWN	YIL069C		ARO2	101.513	-1.26531	0.29357	-4.31009	1.63186e-05	0.000225639	TRUE	DOWN	YGL148W_mRNA
RPL34B	126.947	-1.87363	0.320651	-5.84321	5.12034e-09	2.09365e-07	TRUE	DOWN	YIL052C		RRP15	31.5128	-1.26536	0.40781	-3.10281	0.00191693	0.0123346	TRUE	DOWN	YPR143W_mRNA
NCE103	10.4478	-1.87411	0.713334	-2.62726	0.00860765	0.0452516	TRUE	DOWN	YNL036W		RPL41B	1104.94	-1.26641	0.25052	-5.05511	4.30139e-07	1.05728e-05	TRUE	DOWN	YDL133C-A_mRNA
URA4	8.69986	-1.8804	0.715969	-2.62637	0.00862999	0.0452613	TRUE	DOWN	YLR420W		RPL27B	93.5842	-1.2671	0.334711	-3.78567	0.000153297	0.00153798	TRUE	DOWN	YDR471W_mRNA
HOM2	73.19	-1.8823	0.33009	-5.70239	1.18141e-08	4.42127e-07	TRUE	DOWN	YDR158W		RPS7B	167.388	-1.26779	0.279167	-4.54134	5.58966e-06	9.28337e-05	TRUE	DOWN	YNL096C_mRNA
HIS1	35.2784	-1.939	0.415276	-4.66919	3.02391e-06	5.564e-05	TRUE	DOWN	YER055C		NOP1	37.961	-1.30518	0.392865	-3.32222	0.000893051	0.00675875	TRUE	DOWN	YDL014W_mRNA
NA.48	14.1679	-1.94068	0.692685	-2.80167	0.00508386	0.0285627	TRUE	DOWN	snR14		ERV14	31.5862	-1.31612	0.421202	-3.12467	0.00178005	0.0116676	TRUE	DOWN	YGL054C_mRNA
RPL25	186.996	-1.97694	0.352167	-5.61365	1.98104e-08	7.17072e-07	TRUE	DOWN	YOL127W		RPL16A	96.7748	-1.32183	0.337229	-3.91968	8.86648e-05	0.00096008	TRUE	DOWN	YIL133C_mRNA
FIT2	9.26083	-1.97831	0.718907	-2.75184	0.0059262	0.0327126	TRUE	DOWN	YOR382W		RPS19B	241.294	-1.32222	0.258567	-5.11363	3.16027e-07	8.23614e-06	TRUE	DOWN	YNL302C_mRNA
ARO4	32.8809	-1.98427	0.415036	-4.78094	1.74476e-06	3.70426e-05	TRUE	DOWN	YBR249C		NA.19	15136.3	-1.32603	0.377516	-3.51252	0.000443875	0.00376222	TRUE	DOWN	YLR154W-B_mRNA
ILV1	8.35067	-1.99226	0.728769	-2.73374	0.00626203	0.0342242	TRUE	DOWN	YER086W		RPL27A	359.277	-1.32614	0.274753	-4.82667	1.38837e-06	2.7521e-05	TRUE	DOWN	YHR010W_mRNA
NA.34	12.722	-2.00186	0.672657	-2.97605	0.00291989	0.0187963	TRUE	DOWN	snR82		RPL18A	280.032	-1.32905	0.270372	-4.91563	8.84979e-07	1.84346e-05	TRUE	DOWN	YOL120C_mRNA
HOM3	9.79356	-2.01769	0.69265	-2.913	0.00357978	0.0218952	TRUE	DOWN	YER052C		RPS16B	183.339	-1.332	0.272789	-4.88289	1.04542e-06	2.14138e-05	TRUE	DOWN	YDL083C_mRNA
ILV2	39.5588	-2.02165	0.463971	-4.35729	1.31683e-05	0.000197793	TRUE	DOWN	YMR108W		RPL35A	237.478	-1.33524	0.280065	-4.76759	1.86445e-06	3.49833e-05	TRUE	DOWN	YDL191W_mRNA
URA1	15.2155	-2.02843	0.56846	-3.56829	0.000359323	0.00321208	TRUE	DOWN	YKL216W		SMT3	21.8862	-1.33808	0.499593	-2.67834	0.00739877	0.0371905	TRUE	DOWN	YDR510W_mRNA
RPS10A	192.591	-2.0315	0.288585	-7.03951	1.92914e-12	1.85197e-10	TRUE	DOWN	YOR293W		CMD1	25.2524	-1.33865	0.436711	-3.0653	0.0021745	0.0134295	TRUE	DOWN	YBR109C_mRNA
RPL11B	107.041	-2.03544	0.325722	-6.24902	4.13043e-10	2.12093e-08	TRUE	DOWN	YGR085C		RPL22A	219.549	-1.33982	0.303134	-4.41989	9.87515e-06	0.000154606	TRUE	DOWN	YLR061W_mRNA
NNF1	11.0542	-2.06966	0.658207	-3.14439	0.00166436	0.0117035	TRUE	DOWN	YJR112W		RPL6A	274.621	-1.34311	0.27246	-4.92957	8.24125e-07	1.77693e-05	TRUE	DOWN	YML073C_mRNA
RPL22B	26.472	-2.11052	0.455081	-4.63767	3.52366e-06	6.42995e-05	TRUE	DOWN	YFL034C-A		RPS25A	112.186	-1.34636	0.310174	-4.34065	1.42061e-05	0.000205404	TRUE	DOWN	YGR027C_mRNA
SRD1	7.63362	-2.11551	0.771774	-2.7411	0.00612337	0.0335494	TRUE	DOWN	YCR018C		RPS27A	134.69	-1.35434	0.291012	-4.65389	3.25728e-06	5.73974e-05	TRUE	DOWN	YKL156W_mRNA
LYS20	40.9115	-2.12177	0.395757	-5.3613	8.26268e-08	2.72298e-06	TRUE	DOWN	YDL182W		RPO26	34.7265	-1.36731	0.393385	-3.47575	0.000509435	0.00423038	TRUE	DOWN	YPR187W_mRNA
RPS10B	104.313	-2.12636	0.317544	-6.69628	2.13791e-11	1.47516e-09	TRUE	DOWN	YMR230W		ESS1	29.993	-1.36749	0.420407	-3.25277	0.00114286	0.00818993	TRUE	DOWN	YJR017C_mRNA
RPS28A	291.797	-2.14393	0.303288	-7.06896	1.56099e-12	1.56666e-10	TRUE	DOWN	YOR167C		MET16	18.1429	-1.38037	0.487486	-2.83162	0.00463131	0.0253536	TRUE	DOWN	YPR167C_mRNA
HIS4	19.7612	-2.17341	0.554834	-3.91722	8.95742e-05	0.00100908	TRUE	DOWN	YCL030C		HTB2	35.0573	-1.39058	0.439674	-3.16275	0.00156289	0.0106121	TRUE	DOWN	YBL002W_mRNA
ALD5	36.9071	-2.20643	0.433712	-5.08731	3.63181e-07	9.77933e-06	TRUE	DOWN	YER073W		ATP18	24.2277	-1.39236	0.440463	-3.16113	0.0015716	0.0106419	TRUE	DOWN	YML081C-A_mRNA
TOM5	7.78925	-2.22907	0.80295	-2.7761	0.00550157	0.0306754	TRUE	DOWN	YPR133W-A		RPS30A	171.424	-1.39479	0.296399	-4.7058	2.52868e-06	4.63843e-05	TRUE	DOWN	YLR287C-A_mRNA
ARG1	130.93	-2.27695	0.462934	-4.91853	8.71978e-07	2.18787e-05	TRUE	DOWN	YOL058W		BUD28	47.9545	-1.39754	0.352962	-3.95946	7.512e-05	0.000835498	TRUE	DOWN	YLR062C_mRNA
RPS11B	38.8285	-2.28109	0.448192	-5.08954	3.58941e-07	9.77933e-06	TRUE	DOWN	YBR048W		RPL20A	98.1506	-1.39812	0.317687	-4.40094	1.07785e-05	0.000163541	TRUE	DOWN	YMR242C_mRNA
NA.3	89.8241	-2.29465	0.366584	-6.25954	3.86111e-10	2.02984e-08	TRUE	DOWN	YIL053W		RPL34A	182.534	-1.39919	0.304291	-4.59819	4.26178e-06	7.3255e-05	TRUE	DOWN	YER056C-A_mRNA
RPS27B	241.282	-2.31154	0.314852	-7.34167	2.10939e-13	2.91096e-11	TRUE	DOWN	YHR021C		TIP1	18.923	-1.39934	0.541448	-2.58444	0.0097536	0.0463721	TRUE	DOWN	YBR067C_mRNA
RPL29	128.483	-2.33145	0.315989	-7.37828	1.60353e-13	2.3604e-11	TRUE	DOWN	YFR032C-A		RPS24A	413.006	-1.40927	0.263796	-5.34227	9.17909e-08	2.71834e-06	TRUE	DOWN	YER074W_mRNA
FUR1	6.63452	-2.35285	0.904185	-2.60218	0.00926338	0.0477887	TRUE	DOWN	YHR128W		RPL40A	333.436	-1.4097	0.270748	-5.2067	1.92226e-07	5.30889e-06	TRUE	DOWN	YIL148W_mRNA
ARG4	13.4733	-2.3812	0.685799	-3.47215	0.000516309	0.00443584	TRUE	DOWN	YHR018C		EBP2	26.3703	-1.4104	0.431837	-3.26603	0.00109065	0.00788477	TRUE	DOWN	YKL172W_mRNA
RPL40B	256.8	-2.40164	0.289008	-8.30996	9.57305e-17	2.11373e-14	TRUE	DOWN	YKR094C		PHO88	68.1801	-1.4159	0.331265	-4.27423	1.91801e-05	0.000259037	TRUE	DOWN	YBR106W_mRNA
ARG7	12.5353	-2.44422	0.669683	-3.64982	0.000262424	0.00254137	TRUE	DOWN	YMR062C		NA.24	28.9102	-1.41597	0.430872	-3.28628	0.00101519	0.0074711	TRUE	DOWN	YCR087W_mRNA
KRR1	9.63164	-2.4765	0.745387	-3.32243	0.000892362	0.00716486	TRUE	DOWN	YCL059C		RPL33B	186.959	-1.4167	0.295921	-4.78741	1.68951e-06	3.19447e-05	TRUE	DOWN	YOR234C_mRNA
CPA1	7.28009	-2.49465	0.863888	-2.88771	0.00388064	0.0232838	TRUE	DOWN	YOR303W		ISU2	26.4733	-1.42625	0.453887	-3.1423	0.00167628	0.0111896	TRUE	DOWN	YOR226C_mRNA
RPS29A	20.3804	-2.52919	0.550453	-4.59475	4.33261e-06	7.47374e-05	TRUE	DOWN	YLR388W		MET28	15.5989	-1.4329	0.553225	-2.59009	0.00959508	0.0458847	TRUE	DOWN	YIR017C_mRNA
NA.26	9.48837	-2.59382	0.768136	-3.37677	0.00073343	0.00608802	TRUE	DOWN	snR45		RPL17B	84.5073	-1.43328	0.339079	-4.22698	2.36853e-05	0.000308034	TRUE	DOWN	YJL177W_mRNA
ATG41	17.4654	-2.60472	0.582308	-4.47309	7.70959e-06	0.000124254	TRUE	DOWN	YPL250C		RET3	13.729	-1.43602	0.556815	-2.57899	0.00990892	0.0469544	TRUE	DOWN	YPL010W_mRNA
RPS11A	72.9164	-2.61513	0.389997	-6.70552	2.00697e-11	1.42948e-09	TRUE	DOWN	YDR025W		RPL26A	117.092	-1.45795	0.306788	-4.75232	2.01095e-06	3.74464e-05	TRUE	DOWN	YLR344W_mRNA
AGA2	16.9007	-2.66146	0.605243	-4.39734	1.09586e-05	0.000166872	TRUE	DOWN	YGL032C		DBP2	16.3443	-1.46765	0.523255	-2.80486	0.00503392	0.0273143	TRUE	DOWN	YNL112W_mRNA
RPS29B	64.2808	-2.67831	0.411123	-6.51463	7.28703e-11	4.34859e-09	TRUE	DOWN	YDL061C		TRX1	105.854	-1.47527	0.310591	-4.74986	2.03557e-06	3.76198e-05	TRUE	DOWN	YLR043C_mRNA
NA.33	6.56997	-2.78976	0.92277	-3.02325	0.00250078	0.0164827	TRUE	DOWN	snR68		SRP14	17.7242	-1.47598	0.508918	-2.90023	0.00372886	0.0210702	TRUE	DOWN	YDL092W_mRNA
RPS30B	42.9104	-3.02882	0.457309	-6.62315	3.51634e-11	2.28355e-09	TRUE	DOWN	YOR182C		NA.33	19.785	-1.47913	0.49619	-2.98097	0.00287339	0.0171483	TRUE	DOWN	YLR264C-A_mRNA
OAC1	21.6266	-3.32543	0.585921	-5.67556	1.38235e-08	5.08704e-07	TRUE	DOWN	YKL120W		RPL12A	153.972	-1.48251	0.297811	-4.97803	6.42364e-07	1.43539e-05	TRUE	DOWN	YEL054C_mRNA
NA.40	4.59972	-3.37921	1.17729	-2.87033	0.00410042	0.0243546	TRUE	DOWN	snR40		SPO24	108.296	-1.48275	0.358747	-4.13314	3.57843e-05	0.000441999	TRUE	DOWN	YPR036W-A_mRNA
NA.39	4.39634	-3.40088	1.17733	-2.88863	0.00386919	0.0232784	TRUE	DOWN	tH(GUG)E2		SAM4	29.5547	-1.48451	0.436147	-3.4037	0.000664789	0.00535755	TRUE	DOWN	YPL273W_mRNA
NA.35	4.67523	-3.40999	1.15109	-2.9624	0.00305255	0.0193679	TRUE	DOWN	snR62		NA.34	19.9433	-1.48612	0.499848	-2.97314	0.00294771	0.017459	TRUE	DOWN	YDL121C_mRNA
BAT1	37.3218	-3.5149	0.466247	-7.53871	4.74633e-14	7.48564e-12	TRUE	DOWN	YHR208W		CBF5	16.2076	-1.49588	0.524194	-2.85368	0.00432164	0.0239475	TRUE	DOWN	YLR175W_mRNA
NA.10	11.546	-3.73051	0.793767	-4.69976	2.60465e-06	5.00093e-05	TRUE	DOWN	snR128		MFA2	16.9843	-1.50534	0.560335	-2.68651	0.00722035	0.0364428	TRUE	DOWN	YNL145W_mRNA
SOE1	5.61061	-3.73187	1.1334	-3.29262	0.000992587	0.00771701	TRUE	DOWN	tE(UUC)G1		RPL6B	128.513	-1.52965	0.306903	-4.98416	6.2231e-07	1.40334e-05	TRUE	DOWN	YLR448W_mRNA
NA.20	7.49519	-3.7322	0.976401	-3.82241	0.000132155	0.00141649	TRUE	DOWN	YOL118C		DRE2	16.1671	-1.53016	0.529008	-2.8925	0.00382191	0.0214481	TRUE	DOWN	YKR071C_mRNA
TRM1	3.89129	-3.77155	1.34478	-2.80457	0.00503831	0.0284927	TRUE	DOWN	YDR120C		TOM7	24.1024	-1.54782	0.461381	-3.35476	0.00079434	0.0061399	TRUE	DOWN	YNL070W_mRNA
ARG3	4.10414	-3.77922	1.32332	-2.85586	0.00429201	0.0249389	TRUE	DOWN	YJL088W		RPL31A	269.918	-1.55187	0.285667	-5.43243	5.55931e-08	1.75189e-06	TRUE	DOWN	YDL075W_mRNA
NA.25	6.21164	-3.81718	1.1009	-3.46734	0.00052564	0.0044985	TRUE	DOWN	snR39B		HXT1	19.764	-1.55441	0.50358	-3.08671	0.00202383	0.0128435	TRUE	DOWN	YHR094C_mRNA
LEU1	94.6382	-3.88121	0.365206	-10.6275	2.2209e-26	8.17291e-24	TRUE	DOWN	YGL009C		ASN1	46.4988	-1.55544	0.373063	-4.16939	3.05412e-05	0.000388031	TRUE	DOWN	YPR145W_mRNA
HIS3	21.5943	-5.3332	0.864273	-6.17073	6.79736e-10	3.26273e-08	TRUE	DOWN	YOR202W		RPL13B	261.902	-1.55832	0.310574	-5.01754	5.23361e-07	1.2136e-05	TRUE	DOWN	YMR142C_mRNA
NA.19	6.00878	-5.35491	1.3783	-3.88515	0.000102265	0.00112901	TRUE	DOWN	snR52		SUI2	19.3077	-1.56104	0.497799	-3.13588	0.00171342	0.011352	TRUE	DOWN	YJR007W_mRNA
NA.4	4601.91	-5.46083	0.87774	-6.22146	4.92534e-10	2.47163e-08	TRUE	DOWN	SCR1		OPI11	279.473	-1.56691	0.284034	-5.51663	3.4556e-08	1.11761e-06	TRUE	DOWN	YPR044C_mRNA
NA.18	4.19002	-5.82229	1.44909	-4.0179	5.87195e-05	0.000700825	TRUE	DOWN	snR77		RPL36A	119.47	-1.56708	0.290658	-5.3915	6.98727e-08	2.12033e-06	TRUE	DOWN	YMR194W_mRNA
NA.2	33.7368	-5.91635	0.855619	-6.91471	4.68831e-12	4.31325e-10	TRUE	DOWN	ETS2-2		RPL35B	65.1876	-1.5706	0.363336	-4.32273	1.54111e-05	0.000215231	TRUE	DOWN	YDL136W_mRNA
NA.9	6.86182	-6.53348	1.36315	-4.79294	1.64359e-06	3.52334e-05	TRUE	DOWN	snR86		MPC2	38.0498	-1.57603	0.38197	-4.12605	3.69054e-05	0.000453567	TRUE	DOWN	YHR162W_mRNA
NA.5	34.0301	-7.87165	1.27917	-6.15371	7.56921e-10	3.55592e-08	TRUE	DOWN	ETS2-1		RPS20	237.726	-1.57917	0.305786	-5.16429	2.41357e-07	6.44844e-06	TRUE	DOWN	YHL015W_mRNA
											FSF1	23.2455	-1.58874	0.577388	-2.75159	0.00593061	0.0312151	TRUE	DOWN	YOR271C_mRNA
											RPL17A	83.0753	-1.59145	0.367374	-4.33197	1.47782e-05	0.000212426	TRUE	DOWN	YKL180W_mRNA
											OST3	13.1584	-1.60759	0.578779	-2.77755	0.00547708	0.0294588	TRUE	DOWN	YOR085W_mRNA
											NA.6	42.9955	-1.637	0.374239	-4.37421	1.21875e-05	0.000181557	TRUE	DOWN	YPR170W-B_mRNA
											LHP1	46.4158	-1.64104	0.385477	-4.25717	2.07032e-05	0.000276567	TRUE	DOWN	YDL051W_mRNA
											RPS7A	441.958	-1.64179	0.255114	-6.43551	1.23059e-10	7.03438e-09	TRUE	DOWN	YOR096W_mRNA
											NA.39	12.985	-1.65686	0.597345	-2.77372	0.00554202	0.0296782	TRUE	DOWN	YIL002W-A_mRNA
											NHP2	59.6966	-1.66043	0.334842	-4.95884	7.09161e-07	1.57038e-05	TRUE	DOWN	YDL208W_mRNA
											NOP15	24.6272	-1.66308	0.444053	-3.74523	0.00018023	0.00175796	TRUE	DOWN	YNL110C_mRNA
											RPS13	297.525	-1.68003	0.278073	-6.04168	1.52519e-09	6.94245e-08	TRUE	DOWN	YDR064W_mRNA
											RIB4	107.478	-1.68174	0.321871	-5.22487	1.74273e-07	4.86777e-06	TRUE	DOWN	YOL143C_mRNA
											RPL20B	268.888	-1.69011	0.283594	-5.95961	2.52837e-09	1.10977e-07	TRUE	DOWN	YOR312C_mRNA
											NTF2	22.9618	-1.7129	0.516787	-3.31451	0.000918042	0.00692192	TRUE	DOWN	YER009W_mRNA
											NA.4	60.9801	-1.72162	0.357773	-4.81204	1.494e-06	2.89153e-05	TRUE	DOWN	YPL142C_mRNA
											REI1	10.9112	-1.7327	0.63241	-2.73984	0.00614699	0.0321648	TRUE	DOWN	YBR267W_mRNA
											GLY1	27.6914	-1.7633	0.48136	-3.66316	0.000249118	0.00228482	TRUE	DOWN	YEL046C_mRNA
											ACO2	13.2639	-1.76501	0.599902	-2.94217	0.00325923	0.0189459	TRUE	DOWN	YJL200C_mRNA
											SNU13	28.8544	-1.76537	0.485033	-3.6397	0.00027296	0.00244755	TRUE	DOWN	YEL026W_mRNA
											RPS19A	175.708	-1.77111	0.314474	-5.63196	1.78176e-08	5.9994e-07	TRUE	DOWN	YOL121C_mRNA
											HOM2	82.581	-1.7957	0.314058	-5.71773	1.07959e-08	3.88004e-07	TRUE	DOWN	YDR158W_mRNA
											RPB10	14.3711	-1.79988	0.578952	-3.10886	0.0018781	0.0121981	TRUE	DOWN	YOR210W_mRNA
											RPA49	9.56302	-1.81175	0.670161	-2.70346	0.00686212	0.0349438	TRUE	DOWN	YNL248C_mRNA
											HMF1	18.4007	-1.81222	0.535189	-3.38614	0.000708844	0.00558442	TRUE	DOWN	YER057C_mRNA
											RPS22A	261.636	-1.8276	0.265722	-6.87785	6.0763e-12	5.33413e-10	TRUE	DOWN	YJL190C_mRNA
											ALB1	9.73561	-1.83187	0.715519	-2.5602	0.0104613	0.0488858	TRUE	DOWN	YJL122W_mRNA
											GSP1	79.398	-1.84198	0.356034	-5.17361	2.29616e-07	6.25435e-06	TRUE	DOWN	YLR293C_mRNA
											NSR1	69.4548	-1.85583	0.340763	-5.44612	5.14802e-08	1.64336e-06	TRUE	DOWN	YGR159C_mRNA
											PCL5	36.425	-1.85624	0.395275	-4.69606	2.65227e-06	4.79358e-05	TRUE	DOWN	YHR071W_mRNA
											RPL37A	233.308	-1.86339	0.303243	-6.14487	8.003e-10	3.78296e-08	TRUE	DOWN	YLR185W_mRNA
											NCE103	10.2511	-1.8684	0.699065	-2.67272	0.00752398	0.0376659	TRUE	DOWN	YNL036W_mRNA
											RPL33A	95.0048	-1.87095	0.334943	-5.58587	2.32539e-08	7.72405e-07	TRUE	DOWN	YPL143W_mRNA
											NA.22	17.2486	-1.88489	0.55529	-3.39443	0.000687708	0.0054705	TRUE	DOWN	YGR079W_mRNA
											RPB8	26.3718	-1.89907	0.466466	-4.07119	4.67732e-05	0.00054747	TRUE	DOWN	YOR224C_mRNA
											RPS24B	77.1046	-1.90036	0.332683	-5.71223	1.11504e-08	3.91539e-07	TRUE	DOWN	YIL069C_mRNA
											RPL34B	127.198	-1.92978	0.321055	-6.01076	1.84651e-09	8.25224e-08	TRUE	DOWN	YIL052C_mRNA
											RPL21A	136.735	-1.93066	0.340321	-5.67305	1.40281e-08	4.78905e-07	TRUE	DOWN	YBR191W_mRNA
											ARO4	32.8665	-1.94281	0.40547	-4.79149	1.65549e-06	3.15441e-05	TRUE	DOWN	YBR249C_mRNA
											URA1	14.4487	-1.96457	0.562646	-3.49166	0.000480035	0.00402705	TRUE	DOWN	YKL216W_mRNA
											UGA3	9.79378	-1.98404	0.666993	-2.97461	0.00293366	0.0174177	TRUE	DOWN	YDL170W_mRNA
											SNZ1	15.8582	-1.99754	0.541663	-3.68778	0.000226215	0.00211421	TRUE	DOWN	YMR096W_mRNA
											SEC66	8.11577	-2.01441	0.73984	-2.72277	0.00647375	0.0334296	TRUE	DOWN	YBR171W_mRNA
											URA4	9.31865	-2.01914	0.680075	-2.96899	0.00298776	0.0176113	TRUE	DOWN	YLR420W_mRNA
											HIS1	36.2439	-2.01943	0.403535	-5.00433	5.60556e-07	1.27578e-05	TRUE	DOWN	YER055C_mRNA
											RPS10A	202.266	-2.02676	0.2911	-6.96242	3.34466e-12	3.04488e-10	TRUE	DOWN	YOR293W_mRNA
											RPL25	186.634	-2.03128	0.347687	-5.84227	5.14946e-09	2.04151e-07	TRUE	DOWN	YOL127W_mRNA
											SRD1	7.71027	-2.03149	0.741513	-2.73966	0.00615031	0.0321648	TRUE	DOWN	YCR018C_mRNA
											RPL11B	108.657	-2.03949	0.319445	-6.38448	1.71981e-10	9.60746e-09	TRUE	DOWN	YGR085C_mRNA
											ILV2	39.9596	-2.04592	0.464259	-4.40684	1.04888e-05	0.000160134	TRUE	DOWN	YMR108W_mRNA
											LYS20	41.3407	-2.07208	0.384158	-5.39382	6.89759e-08	2.11929e-06	TRUE	DOWN	YDL182W_mRNA
											RFU1	10.7106	-2.07278	0.643546	-3.22087	0.00127801	0.00897529	TRUE	DOWN	YLR073C_mRNA
											RPS10B	111.191	-2.08798	0.321162	-6.50131	7.96255e-11	5.06677e-09	TRUE	DOWN	YMR230W_mRNA
											HOM3	10.0154	-2.08917	0.672698	-3.10565	0.00189858	0.0122486	TRUE	DOWN	YER052C_mRNA
											CPA1	17.1519	-2.09547	0.540638	-3.87593	0.000106218	0.00112191	TRUE	DOWN	YOR303W_mRNA
											NNF1	11.1089	-2.1096	0.641862	-3.28669	0.00101373	0.0074711	TRUE	DOWN	YJR112W_mRNA
											NAR1	7.9628	-2.11315	0.736101	-2.87073	0.00409523	0.0228774	TRUE	DOWN	YNL240C_mRNA
											BUD19	126.749	-2.14167	0.32767	-6.53605	6.31644e-11	4.19616e-09	TRUE	DOWN	YJL188C_mRNA
											ILV1	8.24202	-2.15217	0.727594	-2.95793	0.00309712	0.0181255	TRUE	DOWN	YER086W_mRNA
											RPL22B	26.9674	-2.15878	0.445154	-4.84951	1.23766e-06	2.49359e-05	TRUE	DOWN	YFL034C-A_mRNA
											RPS28A	293.404	-2.17243	0.301619	-7.20255	5.90951e-13	6.91694e-11	TRUE	DOWN	YOR167C_mRNA
											NA.38	7.43829	-2.18284	0.76374	-2.85809	0.00426196	0.0237011	TRUE	DOWN	YPR142C_mRNA
											RPS11B	44.8468	-2.19645	0.435492	-5.04359	4.56878e-07	1.07981e-05	TRUE	DOWN	YBR048W_mRNA
											TOM5	7.60297	-2.22305	0.782851	-2.83968	0.00451583	0.024832	TRUE	DOWN	YPR133W-A_mRNA
											HIS4	19.9911	-2.22682	0.541942	-4.10897	3.97427e-05	0.000476525	TRUE	DOWN	YCL030C_mRNA
											ALD5	35.9577	-2.25494	0.424799	-5.30824	1.10688e-07	3.20083e-06	TRUE	DOWN	YER073W_mRNA
											GPP1	90.5961	-2.27404	0.359981	-6.31712	2.66487e-10	1.31005e-08	TRUE	DOWN	YIL053W_mRNA
											RPL7B	14.4295	-2.28572	0.582637	-3.92306	8.7431e-05	0.000955135	TRUE	DOWN	YPL198W_mRNA
											FIT2	8.5636	-2.29959	0.739792	-3.10843	0.00188084	0.0121981	TRUE	DOWN	YOR382W_mRNA
											GLO4	5.64686	-2.30903	0.902575	-2.55827	0.0105194	0.0490641	TRUE	DOWN	YOR040W_mRNA
											RPL29	320.713	-2.32174	0.302443	-7.67664	1.63314e-14	2.50891e-12	TRUE	DOWN	YFR032C-A_mRNA
											ARG4	14.9085	-2.32984	0.635004	-3.66901	0.000243491	0.00224157	TRUE	DOWN	YHR018C_mRNA
											ARG1	133.87	-2.33818	0.457651	-5.1091	3.23696e-07	8.23614e-06	TRUE	DOWN	YOL058W_mRNA
											RPS27B	240.977	-2.34014	0.312255	-7.49432	6.66438e-14	8.6216e-12	TRUE	DOWN	YHR021C_mRNA
											YAH1	11.3979	-2.39843	0.652139	-3.6778	0.000235258	0.00218213	TRUE	DOWN	YPL252C_mRNA
											RPL40B	257.664	-2.45445	0.286487	-8.56739	1.05853e-17	2.85968e-15	TRUE	DOWN	YKR094C_mRNA
											RPS11A	102.751	-2.48046	0.354612	-6.99486	2.65527e-12	2.61066e-10	TRUE	DOWN	YDR025W_mRNA
											ATG41	17.104	-2.49464	0.568978	-4.38442	1.16295e-05	0.00017537	TRUE	DOWN	YPL250C_mRNA
											RPA14	23.1001	-2.49723	0.50578	-4.93739	7.91747e-07	1.7376e-05	TRUE	DOWN	YDR156W_mRNA
											NA.28	11863.1	-2.49989	0.795917	-3.14089	0.00168436	0.0111896	TRUE	DOWN	YLR154C-G_mRNA
											ARG7	12.8021	-2.50794	0.652845	-3.84156	0.000122253	0.0012626	TRUE	DOWN	YMR062C_mRNA
											NA.23	8.16367	-2.53721	0.760857	-3.33468	0.000853985	0.00651893	TRUE	DOWN	YGL117W_mRNA
											KRR1	10.4009	-2.639	0.70926	-3.72078	0.000198612	0.00190698	TRUE	DOWN	YCL059C_mRNA
											AGA2	17.6472	-2.66695	0.581024	-4.59008	4.43068e-06	7.51076e-05	TRUE	DOWN	YGL032C_mRNA
											RPS29A	20.8754	-2.67461	0.548429	-4.87686	1.07786e-06	2.18958e-05	TRUE	DOWN	YLR388W_mRNA
											RPS29B	63.416	-2.68652	0.406686	-6.60589	3.95147e-11	2.84669e-09	TRUE	DOWN	YDL061C_mRNA
											NA.30	6.60726	-2.75145	0.895333	-3.0731	0.00211846	0.0132162	TRUE	DOWN	YGR164W_mRNA
											NA.11	11.3545	-2.79286	0.688485	-4.05653	4.98068e-05	0.000574766	TRUE	DOWN	YOL013W-A_mRNA
											SDT1	4.45582	-2.81464	1.05715	-2.66248	0.00775678	0.0386616	TRUE	DOWN	YGL224C_mRNA
											NA.42	4.66355	-2.8975	1.06995	-2.70806	0.00676768	0.0346562	TRUE	DOWN	YNL042W-B_mRNA
											RPS30B	43.3767	-2.97858	0.441003	-6.75411	1.43711e-11	1.13949e-09	TRUE	DOWN	YOR182C_mRNA
											MAE1	8.06541	-3.28091	0.846548	-3.87563	0.000106349	0.00112191	TRUE	DOWN	YKL029C_mRNA
											NA.36	4.3749	-3.36188	1.15367	-2.91408	0.00356744	0.0203452	TRUE	DOWN	YER097W_mRNA
											OAC1	21.7865	-3.36641	0.579023	-5.81394	6.10191e-09	2.34352e-07	TRUE	DOWN	YKL120W_mRNA
											BAT1	37.8762	-3.43346	0.450625	-7.61933	2.54995e-14	3.4821e-12	TRUE	DOWN	YHR208W_mRNA
											NA.15	7.53307	-3.75857	0.958433	-3.92158	8.79712e-05	0.000956784	TRUE	DOWN	YOR203W_mRNA
											NA.13	7.71702	-3.80615	0.953784	-3.99058	6.59128e-05	0.00074097	TRUE	DOWN	YOL118C_mRNA
											LEU1	95.5075	-3.92167	0.362255	-10.8257	2.60023e-27	1.1039e-24	TRUE	DOWN	YGL009C_mRNA
											HIS3	565.113	-4.34814	0.385796	-11.2706	1.83391e-29	1.12694e-26	TRUE	DOWN	YOR202W_mRNA
10 hour post-sequencing initiation											10 hour post-sequencing initiation
gene name	gene base mean	log 2 fold change	lfcSE	stat	p-value	p-adjusted	significance	significance_reg	gene ID		transcript name	transcript base mean	log 2 fold change	lfcSE	stat	p-value	p-adjusted	significance	significance_reg	gene ID
HXT4	17.7704	7.34853	1.2589	5.83726	5.30674e-09	2.1382e-07	TRUE	UP	YHR092C		HXT6	34.234	6.40967	1.08395	5.91326	3.35396e-09	1.45614e-07	TRUE	UP	YDR343C_mRNA
HXT6	33.8877	7.31899	1.23439	5.92924	3.04343e-09	1.33094e-07	TRUE	UP	YDR343C		HXT4	17.1866	6.28066	1.25679	4.99738	5.8115e-07	1.42852e-05	TRUE	UP	YHR092C_mRNA
URA3	373.4	6.29094	0.39672	15.8574	1.24954e-56	4.48086e-53	TRUE	UP	YEL021W		URA3	361.87	5.709	0.377333	15.1299	1.02911e-51	3.44033e-48	TRUE	UP	YEL021W_mRNA
HXK1	23.7356	5.92637	1.10291	5.37338	7.7274e-08	2.4096e-06	TRUE	UP	YFR053C		HygR	257.603	5.52641	0.411362	13.4344	3.80064e-41	4.23518e-38	TRUE	UP	HygR
HygR	263.848	5.57771	0.395823	14.0914	4.28881e-45	5.12656e-42	TRUE	UP	HygR		MPC3	9.59844	5.42241	1.29692	4.18098	2.90251e-05	0.000379027	TRUE	UP	YGR243W_mRNA
MPC3	9.71281	5.48663	1.30322	4.21005	2.55317e-05	0.000376776	TRUE	UP	YGR243W		NA.12	15.8252	5.28087	1.11179	4.74988	2.0354e-06	3.82267e-05	TRUE	UP	YOR062C_mRNA
NA.19	17.091	5.4269	1.11444	4.86962	1.11815e-06	2.35863e-05	TRUE	UP	YNL194C		TMA10	217.358	5.10563	0.379782	13.4436	3.35778e-41	4.23518e-38	TRUE	UP	YLR327C_mRNA
COX26	4.50739	5.3755	1.40279	3.83202	0.000127096	0.00151922	TRUE	UP	YDR119W-A		HXK1	39.8078	5.0223	0.685511	7.32636	2.36484e-13	2.39566e-11	TRUE	UP	YFR053C_mRNA
TMA10	224.919	5.28682	0.371338	14.2372	5.38386e-46	9.65326e-43	TRUE	UP	YLR327C		RGI1	20.0338	5.00169	0.929267	5.3824	7.34977e-08	2.37436e-06	TRUE	UP	YER067W_mRNA
NA.16	16.6442	4.774	0.939687	5.08041	3.76613e-07	9.57827e-06	TRUE	UP	YOR062C		GPH1	28.4566	4.80406	0.748825	6.41547	1.40388e-10	9.20232e-09	TRUE	UP	YPR160W_mRNA
GAD1	5.37478	4.62041	1.36584	3.38283	0.000717434	0.00630568	TRUE	UP	YMR250W		NA.32	5.50349	4.61393	1.34978	3.41829	0.000630171	0.00506094	TRUE	UP	YFR052C-A_mRNA
GDB1	8.57552	4.40963	1.18893	3.7089	0.000208162	0.00227582	TRUE	UP	YPR184W		GAD1	5.14579	4.51263	1.35023	3.34212	0.000831422	0.00631017	TRUE	UP	YMR250W_mRNA
AGP2	8.51409	4.37969	1.16817	3.7492	0.000177398	0.00198796	TRUE	UP	YBR132C		NA.8	17.7656	4.42339	0.840164	5.26491	1.40255e-07	4.22409e-06	TRUE	UP	YNL194C_mRNA
NA.62	4.53404	4.36861	1.40762	3.10353	0.00191225	0.0143088	TRUE	UP	YFL041W-A		UIP4	13.2544	4.41942	0.969978	4.5562	5.20868e-06	8.17494e-05	TRUE	UP	YPL186C_mRNA
USV1	4.31315	4.30105	1.40785	3.05506	0.00225019	0.016385	TRUE	UP	YPL230W		AGP2	8.51391	4.35526	1.15748	3.76272	0.000168074	0.00172543	TRUE	UP	YBR132C_mRNA
SDP1	16.51	4.29893	0.852797	5.04097	4.63171e-07	1.14547e-05	TRUE	UP	YIL113W		GDB1	8.29611	4.33081	1.1803	3.66926	0.000243255	0.00233009	TRUE	UP	YPR184W_mRNA
NA.7	22.8778	4.2336	0.715781	5.91466	3.32568e-09	1.43685e-07	TRUE	UP	YGR161W-C		PEX22	8.35484	4.2694	1.15744	3.68866	0.000225438	0.00217306	TRUE	UP	YAL055W_mRNA
AIM17	55.9335	4.20046	0.494481	8.49468	1.98477e-17	3.9541e-15	TRUE	UP	YHL021C		INO4	8.18959	4.2549	1.15331	3.6893	0.000224869	0.00217306	TRUE	UP	YOL108C_mRNA
HXT7	66.7258	4.15124	0.457668	9.07042	1.18561e-19	3.03686e-17	TRUE	UP	YDR342C		MSC1	96.2042	4.23641	0.437695	9.67891	3.70658e-22	1.54889e-19	TRUE	UP	YML128C_mRNA
ACH1	7.10106	4.11719	1.2097	3.40347	0.000665356	0.00597987	TRUE	UP	YBL015W		SDP1	15.8674	4.19808	0.852685	4.92337	8.50668e-07	1.89586e-05	TRUE	UP	YIL113W_mRNA
MSC1	101.178	4.09203	0.397258	10.3007	6.9958e-25	3.13587e-22	TRUE	UP	YML128C		HXT7	63.8646	4.13048	0.477263	8.65453	4.94954e-18	1.18188e-15	TRUE	UP	YDR342C_mRNA
COQ3	10.054	4.07296	1.01335	4.0193	5.83703e-05	0.000758391	TRUE	UP	YOL096C		NA.5	21.5131	4.11194	0.718202	5.72533	1.03234e-08	3.87765e-07	TRUE	UP	YGR161W-C_mRNA
EMI2	66.3658	3.8577	0.427862	9.01622	1.94684e-19	4.65425e-17	TRUE	UP	YDR516C		TSL1	14.3549	4.10706	0.864488	4.75087	2.02548e-06	3.82267e-05	TRUE	UP	YML100W_mRNA
TFS1	103.894	3.81192	0.393214	9.69427	3.18897e-22	1.27063e-19	TRUE	UP	YLR178C		EMI2	63.2324	4.07413	0.466578	8.73194	2.50335e-18	6.43746e-16	TRUE	UP	YDR516C_mRNA
GLC3	8.62362	3.80133	1.01368	3.75003	0.000176812	0.00198775	TRUE	UP	YEL011W		ACH1	6.78168	4.02564	1.19998	3.35474	0.000794384	0.00609088	TRUE	UP	YBL015W_mRNA
ALD4	48.3981	3.79469	0.484542	7.83151	4.82056e-15	5.88934e-13	TRUE	UP	YOR374W		AIM17	54.4561	4.00034	0.494221	8.09423	5.76268e-16	1.07026e-13	TRUE	UP	YHL021C_mRNA
TSL1	14.109	3.76606	0.817801	4.6051	4.12264e-06	7.28265e-05	TRUE	UP	YML100W		COQ3	9.61445	3.98397	1.00675	3.95726	7.58142e-05	0.000876979	TRUE	UP	YOL096C_mRNA
PEX22	8.63889	3.75123	1.00976	3.71497	0.000203226	0.00223548	TRUE	UP	YAL055W		RME1	47.9611	3.95301	0.511758	7.72437	1.12404e-14	1.70802e-12	TRUE	UP	YGR044C_mRNA
YSC84	5.52371	3.71762	1.22785	3.02776	0.00246376	0.0176701	TRUE	UP	YHR016C		NA.1	35.3227	3.92759	0.56054	7.00679	2.4385e-12	2.09024e-10	TRUE	UP	YLR177W_mRNA
ENT1	10.7608	3.69735	0.89333	4.13885	3.49057e-05	0.000491716	TRUE	UP	YDL161W		ALD4	46.0836	3.89795	0.515343	7.5638	3.91473e-14	4.84701e-12	TRUE	UP	YOR374W_mRNA
NA.38	8.36005	3.68963	1.00816	3.65978	0.000252431	0.0026831	TRUE	UP	YER121W		HSP42	52.5266	3.89563	0.492809	7.90495	2.68037e-15	4.48023e-13	TRUE	UP	YDR171W_mRNA
IGD1	5.34911	3.67943	1.24757	2.94927	0.00318524	0.0218399	TRUE	UP	YFR017C		DDR2	27.0167	3.75702	0.614548	6.11347	9.74877e-10	4.9379e-08	TRUE	UP	YOL052C-A_mRNA
NA.4	36.7697	3.63746	0.515464	7.05667	1.70542e-12	1.38991e-10	TRUE	UP	YLR177W		EGO4	14.4188	3.74671	0.802683	4.66773	3.04542e-06	5.36685e-05	TRUE	UP	YNR034W-A_mRNA
HSP30	37.4531	3.5274	0.530249	6.65236	2.88434e-11	1.88059e-09	TRUE	UP	YCR021C		TFS1	102.159	3.74044	0.40688	9.19297	3.82142e-20	1.16136e-17	TRUE	UP	YLR178C_mRNA
ATG3	4.67223	3.5254	1.27841	2.75763	0.00582214	0.0351485	TRUE	UP	YNR007C		IGD1	5.2471	3.62963	1.23198	2.94617	0.0032174	0.0188616	TRUE	UP	YFR017C_mRNA
ATG20	9.82547	3.52185	0.894027	3.93931	8.17148e-05	0.00103179	TRUE	UP	YDL113C		NA.27	7.98355	3.5791	0.997844	3.58684	0.000334716	0.0030242	TRUE	UP	YER121W_mRNA
DDR2	29.0551	3.48361	0.558334	6.23929	4.39569e-10	2.31808e-08	TRUE	UP	YOL052C-A		ATG3	4.85528	3.55974	1.2458	2.8574	0.00427125	0.0236013	TRUE	UP	YNR007C_mRNA
GOR1	23.7556	3.47289	0.606036	5.7305	1.00134e-08	3.8611e-07	TRUE	UP	YNL274C		RTC3	116.805	3.50945	0.368892	9.51351	1.84343e-21	6.84733e-19	TRUE	UP	YHR087W_mRNA
EGO4	14.2638	3.47136	0.759479	4.57071	4.8607e-06	8.42052e-05	TRUE	UP	YNR034W-A		NA.7	20.5926	3.44739	0.650651	5.29838	1.16837e-07	3.58335e-06	TRUE	UP	YNL134C_mRNA
RTC3	122.29	3.46349	0.332937	10.4028	2.40629e-25	1.23271e-22	TRUE	UP	YHR087W		PGM2	14.3169	3.43789	0.744327	4.61879	3.85987e-06	6.45178e-05	TRUE	UP	YMR105C_mRNA
OM45	27.4314	3.46239	0.570923	6.06455	1.32322e-09	6.16245e-08	TRUE	UP	YIL136W		GPP2	73.9018	3.37632	0.407869	8.27795	1.25313e-16	2.7928e-14	TRUE	UP	YER062C_mRNA
NA.2	76.5722	3.44599	0.388354	8.87333	7.09928e-19	1.59113e-16	TRUE	UP	YER062C		NA.4	25.1941	3.373	0.581276	5.80276	6.52326e-09	2.53573e-07	TRUE	UP	YKR075C_mRNA
GPH1	6.81388	3.4301	1.05268	3.25845	0.00112024	0.00910922	TRUE	UP	YPR160W		HSP30	36.0257	3.34861	0.527382	6.3495	2.1601e-10	1.31295e-08	TRUE	UP	YCR021C_mRNA
NA.13	21.7662	3.38355	0.626449	5.40115	6.62136e-08	2.12002e-06	TRUE	UP	YNL134C		NA.13	15.4248	3.3411	0.709666	4.70798	2.50179e-06	4.59533e-05	TRUE	UP	YJL144W_mRNA
INO4	9.07944	3.37233	0.914958	3.68578	0.000228006	0.00245535	TRUE	UP	YOL108C		GLC3	8.54904	3.33747	0.916543	3.64137	0.000271187	0.00255375	TRUE	UP	YEL011W_mRNA
UIP4	4.36249	3.3367	1.2806	2.60558	0.00917193	0.0499856	TRUE	UP	YPL186C		ARO9	11.0599	3.32389	0.807552	4.11601	3.85481e-05	0.000489986	TRUE	UP	YHR137W_mRNA
MIG1	14.5984	3.32985	0.731964	4.5492	5.38508e-06	9.28409e-05	TRUE	UP	YGL035C		ATG20	11.2739	3.31641	0.806898	4.11007	3.95546e-05	0.000498985	TRUE	UP	YDL113C_mRNA
PGM2	15.0316	3.32046	0.718444	4.62174	3.80539e-06	6.82306e-05	TRUE	UP	YMR105C		OM45	26.6607	3.27276	0.563959	5.80318	6.50691e-09	2.53573e-07	TRUE	UP	YIL136W_mRNA
SED1	222.851	3.30228	0.400897	8.23721	1.76269e-16	3.01e-14	TRUE	UP	YDR077W		MSN4	12.4909	3.26875	0.778427	4.19917	2.6789e-05	0.000356796	TRUE	UP	YKL062W_mRNA
HSP42	56.4531	3.28932	0.441824	7.44488	9.7033e-14	9.15685e-12	TRUE	UP	YDR171W		ODC1	8.47922	3.2455	0.910591	3.56417	0.000365011	0.00322125	TRUE	UP	YPL134C_mRNA
TPO4	30.1363	3.26479	0.536619	6.08401	1.17212e-09	5.66793e-08	TRUE	UP	YOR273C		HER2	8.11616	3.19967	0.910515	3.51413	0.000441204	0.00377137	TRUE	UP	YMR293C_mRNA
GSY1	13.8259	3.23376	0.733754	4.40714	1.04744e-05	0.000174703	TRUE	UP	YFR015C		ENT1	19.562	3.19331	0.62789	5.08577	3.66133e-07	9.71414e-06	TRUE	UP	YDL161W_mRNA
NA.66	5.8964	3.22571	1.08638	2.96922	0.00298557	0.0207084	TRUE	UP	YKL018C-A		UBX5	13.7754	3.18779	0.726054	4.39056	1.13058e-05	0.000167235	TRUE	UP	YDR330W_mRNA
MSN4	14.0159	3.22257	0.73846	4.3639	1.27764e-05	0.000203627	TRUE	UP	YKL062W		TPO4	28.6522	3.1592	0.542502	5.8234	5.76638e-09	2.35085e-07	TRUE	UP	YOR273C_mRNA
NA.20	16.1329	3.21099	0.677211	4.74149	2.12153e-06	4.11232e-05	TRUE	UP	YJL144W		NA.11	19.0464	3.14943	0.650976	4.83801	1.31143e-06	2.59414e-05	TRUE	UP	YKL018C-A_mRNA
PHM7	5.54091	3.18469	1.12866	2.82167	0.0047775	0.0299839	TRUE	UP	YOL084W		COQ8	6.01846	3.1344	1.06025	2.95627	0.0031138	0.0184564	TRUE	UP	YGL119W_mRNA
COQ8	6.11978	3.17658	1.08134	2.93763	0.00330729	0.0225047	TRUE	UP	YGL119W		SED1	215.757	3.13013	0.416049	7.52345	5.33497e-14	6.36957e-12	TRUE	UP	YDR077W_mRNA
UBX5	13.5051	3.17164	0.735027	4.315	1.59602e-05	0.00024884	TRUE	UP	YDR330W		VHS3	5.49291	3.12864	1.08056	2.8954	0.00378677	0.0214199	TRUE	UP	YOR054C_mRNA
PTR2	9.50895	3.16839	0.855844	3.70206	0.000213854	0.00232462	TRUE	UP	YKR093W		TDH1	316.53	3.1184	0.387459	8.04833	8.39284e-16	1.4767e-13	TRUE	UP	YJL052W_mRNA
HER2	7.68316	3.16672	0.937304	3.37854	0.000728727	0.00634738	TRUE	UP	YMR293C		GSY1	12.948	3.11757	0.731512	4.26181	2.02774e-05	0.000276683	TRUE	UP	YFR015C_mRNA
NA.37	9.77185	3.12769	0.851378	3.67368	0.000239078	0.00255921	TRUE	UP	YLR297W		MIH1	5.59569	3.11113	1.06574	2.91923	0.00350902	0.0202253	TRUE	UP	YMR036C_mRNA
OTU1	9.35704	3.10742	0.846474	3.67101	0.000241592	0.00257842	TRUE	UP	YFL044C		PHM7	5.28959	3.09729	1.10974	2.791	0.00525452	0.0276643	TRUE	UP	YOL084W_mRNA
TDH1	326.623	3.09812	0.341382	9.07523	1.13442e-19	3.03686e-17	TRUE	UP	YJL052W		NA.49	5.40225	3.06963	1.06748	2.87558	0.00403287	0.0225827	TRUE	UP	YPR195C_mRNA
STF2	43.1811	3.09536	0.454458	6.81111	9.68516e-12	7.23563e-10	TRUE	UP	YGR008C		TMA17	52.1909	3.05685	0.445425	6.86278	6.75345e-12	5.37543e-10	TRUE	UP	YDL110C_mRNA
LAM4	5.39912	3.07603	1.08818	2.82677	0.00470197	0.0296332	TRUE	UP	YHR080C		GSY2	18.8469	3.05011	0.614776	4.96134	7.00081e-07	1.65984e-05	TRUE	UP	YLR258W_mRNA
COX5A	64.4654	3.0693	0.387098	7.929	2.20912e-15	3.04689e-13	TRUE	UP	YNL052W		LAM4	5.32712	3.03513	1.06693	2.84473	0.00444486	0.0243993	TRUE	UP	YHR080C_mRNA
DFG5	14.6577	3.0433	0.683762	4.45082	8.55445e-06	0.00014402	TRUE	UP	YMR238W		PTR2	9.01578	3.03466	0.8463	3.58579	0.000336053	0.0030281	TRUE	UP	YKR093W_mRNA
FUN14	25.6072	3.03222	0.544454	5.56929	2.55786e-08	8.90532e-07	TRUE	UP	YAL008W		COX5A	61.974	2.99507	0.40644	7.36902	1.71888e-13	1.85362e-11	TRUE	UP	YNL052W_mRNA
ODC1	8.90283	3.01122	0.866403	3.47555	0.000509816	0.00477337	TRUE	UP	YPL134C		IMP2	9.01804	2.99452	0.841865	3.55701	0.000375104	0.00329126	TRUE	UP	YMR035W_mRNA
IMP2	8.91334	3.01028	0.857695	3.50973	0.000448559	0.00431242	TRUE	UP	YMR035W		GLK1	123.431	2.98314	0.334928	8.90682	5.25185e-19	1.46308e-16	TRUE	UP	YCL040W_mRNA
ULA1	12.3036	2.98764	0.730955	4.08731	4.36407e-05	0.000592786	TRUE	UP	YPL003W		HEM3	12.363	2.97932	0.723593	4.1174	3.83177e-05	0.000488917	TRUE	UP	YDL205C_mRNA
ALD6	126.982	2.96976	0.40312	7.36693	1.74597e-13	1.6054e-11	TRUE	UP	YPL061W		ULA1	12.3725	2.96427	0.723907	4.09482	4.22501e-05	0.000528996	TRUE	UP	YPL003W_mRNA
ZPS1	29.5716	2.94837	0.550193	5.35878	8.3784e-08	2.59008e-06	TRUE	UP	YOL154W		SPS19	8.71179	2.95741	0.848135	3.48696	0.000488547	0.00409327	TRUE	UP	YNL202W_mRNA
RME1	28.1391	2.9475	0.525898	5.60471	2.08606e-08	7.40656e-07	TRUE	UP	YGR044C		EIS1	9.94187	2.95173	0.816255	3.61619	0.000298967	0.00275329	TRUE	UP	YMR031C_mRNA
TPS2	16.6437	2.9467	0.642006	4.58983	4.43617e-06	7.7981e-05	TRUE	UP	YDR074W		STF2	42.7353	2.95151	0.457713	6.44838	1.13056e-10	7.71317e-09	TRUE	UP	YGR008C_mRNA
HXT2	20.3008	2.94261	0.602123	4.88706	1.02355e-06	2.19788e-05	TRUE	UP	YMR011W		ALT2	10.246	2.94148	0.786385	3.7405	0.000183652	0.00184453	TRUE	UP	YDR111C_mRNA
RTS3	4.94238	2.9416	1.11164	2.64618	0.00814068	0.045828	TRUE	UP	YGR161C		DFG5	13.9659	2.92766	0.680287	4.30356	1.68075e-05	0.000236082	TRUE	UP	YMR238W_mRNA
HSP12	973.295	2.93409	0.242458	12.1014	1.03787e-33	7.44361e-31	TRUE	UP	YFL014W		MIG1	14.5632	2.9213	0.684735	4.26632	1.98726e-05	0.000272271	TRUE	UP	YGL035C_mRNA
NA.34	11.7484	2.93162	0.782182	3.748	0.000178247	0.00199126	TRUE	UP	YJR085C		NNR1	23.6287	2.91118	0.547795	5.31435	1.07037e-07	3.31318e-06	TRUE	UP	YNL200C_mRNA
ARG82	9.92505	2.92471	0.795768	3.67532	0.000237548	0.00255044	TRUE	UP	YDR173C		SDH4	68.9646	2.89727	0.382306	7.57841	3.49816e-14	4.49783e-12	TRUE	UP	YDR178W_mRNA
TMA17	54.6285	2.91967	0.400959	7.28172	3.29595e-13	2.81411e-11	TRUE	UP	YDL110C		RPT1	60.7885	2.8824	0.411591	7.00308	2.50394e-12	2.09267e-10	TRUE	UP	YKL145W_mRNA
GSY2	19.8965	2.90106	0.585588	4.9541	7.26656e-07	1.67038e-05	TRUE	UP	YLR258W		YSC84	5.08583	2.87834	1.06124	2.71224	0.00668293	0.0336388	TRUE	UP	YHR016C_mRNA
TUB4	13.4998	2.89913	0.70998	4.0834	4.43823e-05	0.000600585	TRUE	UP	YLR212C		NA.3	34.1693	2.87388	0.489454	5.87161	4.31588e-09	1.82633e-07	TRUE	UP	YJR015W_mRNA
NBP35	6.74488	2.87019	0.955756	3.00306	0.00267281	0.0188304	TRUE	UP	YGL091C		ARG82	9.83693	2.86403	0.782832	3.65855	0.000253646	0.00241407	TRUE	UP	YDR173C_mRNA
SDH4	70.4992	2.85694	0.364149	7.84554	4.31096e-15	5.52111e-13	TRUE	UP	YDR178W		FUN14	25.1136	2.86206	0.538121	5.31861	1.04564e-07	3.26688e-06	TRUE	UP	YAL008W_mRNA
GAP1	9.04102	2.83935	0.845169	3.3595	0.000780824	0.00671471	TRUE	UP	YKR039W		TPO2	8.06883	2.84796	0.862721	3.30114	0.00096293	0.00704393	TRUE	UP	YGR138C_mRNA
PDE1	18.4658	2.835	0.607643	4.66557	3.07761e-06	5.7183e-05	TRUE	UP	YGL248W		NBP35	6.86704	2.83618	0.931344	3.04526	0.00232482	0.0144997	TRUE	UP	YGL091C_mRNA
PRP40	15.7901	2.833	0.666385	4.25129	2.12541e-05	0.000321592	TRUE	UP	YKL012W		HSP12	958.383	2.8164	0.268359	10.4949	9.1174e-26	4.35421e-23	TRUE	UP	YFL014W_mRNA
HSP26	34.4793	2.82875	0.469223	6.02859	1.654e-09	7.3225e-08	TRUE	UP	YBR072W		NA.21	11.213	2.81255	0.72858	3.86032	0.000113239	0.00122511	TRUE	UP	YER053C-A_mRNA
NNR1	24.8915	2.79534	0.522483	5.3501	8.79042e-08	2.69423e-06	TRUE	UP	YNL200C		ALD6	123.681	2.81167	0.411107	6.83927	7.95987e-12	6.18834e-10	TRUE	UP	YPL061W_mRNA
MIH1	6.02989	2.79022	0.992809	2.81043	0.00494755	0.0308555	TRUE	UP	YMR036C		MCY1	9.58856	2.80744	0.785534	3.57392	0.000351676	0.00312674	TRUE	UP	YGR012W_mRNA
DDP1	25.0227	2.77773	0.543447	5.11132	3.19912e-07	8.25327e-06	TRUE	UP	YOR163W		GPD1	19.6747	2.80611	0.607402	4.61985	3.8401e-06	6.45099e-05	TRUE	UP	YDL022W_mRNA
GAL83	10.8211	2.7684	0.760414	3.64064	0.000271957	0.00285993	TRUE	UP	YER027C		TPS2	15.658	2.80322	0.641363	4.37072	1.23837e-05	0.000180781	TRUE	UP	YDR074W_mRNA
NA.8	35.8851	2.76763	0.471115	5.87465	4.23745e-09	1.76692e-07	TRUE	UP	YJR015W		OPY2	7.48479	2.79184	0.878062	3.17954	0.00147508	0.0099822	TRUE	UP	YPR075C_mRNA
NA.28	12.0354	2.76707	0.710581	3.89409	9.85691e-05	0.00122308	TRUE	UP	YER053C-A		RTN2	7.7282	2.78361	0.864311	3.22061	0.0012792	0.0088721	TRUE	UP	YDL204W_mRNA
COS111	5.99464	2.76701	1.00062	2.7653	0.00568697	0.0345652	TRUE	UP	YBR203W		NDI1	24.1852	2.7812	0.55239	5.03484	4.78236e-07	1.20206e-05	TRUE	UP	YML120C_mRNA
NA.52	8.8824	2.74426	0.813809	3.37212	0.00074593	0.00644556	TRUE	UP	YHR097C		GAP1	8.78079	2.76418	0.830268	3.32926	0.000870773	0.00649465	TRUE	UP	YKR039W_mRNA
PRC1	119.252	2.74181	0.311065	8.81427	1.20468e-18	2.54117e-16	TRUE	UP	YMR297W		PET112	6.33568	2.76417	0.937447	2.94862	0.00319199	0.0187866	TRUE	UP	YBL080C_mRNA
YET3	82.9717	2.73816	0.347973	7.86889	3.57815e-15	4.75231e-13	TRUE	UP	YDL072C		HSP26	33.5859	2.75606	0.475253	5.79914	6.66556e-09	2.56126e-07	TRUE	UP	YBR072W_mRNA
NA.77	5.86259	2.73184	0.981584	2.7831	0.0053843	0.0330103	TRUE	UP	YPR195C		HXT2	19.8049	2.75433	0.58979	4.67001	3.0118e-06	5.35793e-05	TRUE	UP	YMR011W_mRNA
PRM5	6.07111	2.70486	1.00136	2.7012	0.00690906	0.0404174	TRUE	UP	YIL117C		GOR1	28.3534	2.7332	0.505698	5.40481	6.48782e-08	2.12635e-06	TRUE	UP	YNL274C_mRNA
MRPL13	38.5251	2.69796	0.446823	6.0381	1.5594e-09	7.07849e-08	TRUE	UP	YKR006C		ZPS1	29.0144	2.72487	0.55703	4.89179	9.99222e-07	2.11022e-05	TRUE	UP	YOL154W_mRNA
GGA1	16.012	2.69744	0.627675	4.29751	1.72726e-05	0.000268137	TRUE	UP	YDR358W		NA.38	15975.7	2.71423	0.829633	3.2716	0.00106941	0.0076553	TRUE	UP	YLR154W-A_mRNA
TPO2	5.79695	2.69482	0.984944	2.73601	0.00621895	0.0371716	TRUE	UP	YGR138C		FMP45	5.77521	2.71309	0.977598	2.77527	0.00551567	0.0287658	TRUE	UP	YDL222C_mRNA
ERG10	93.5819	2.6789	0.332237	8.0632	7.43237e-16	1.11052e-13	TRUE	UP	YPL028W		RRT15	31.0804	2.70038	0.501789	5.3815	7.38659e-08	2.37436e-06	TRUE	UP	YLR162W-A_mRNA
SAC6	42.5305	2.67832	0.442221	6.05653	1.39092e-09	6.39465e-08	TRUE	UP	YDR129C		NA.22	11.8856	2.68769	0.697292	3.85447	0.000115981	0.00125072	TRUE	UP	YNL115C_mRNA
YJU3	25.8141	2.67771	0.541165	4.94804	7.49647e-07	1.71225e-05	TRUE	UP	YKL094W		TUB4	13.3722	2.68148	0.676288	3.96499	7.33992e-05	0.00085795	TRUE	UP	YLR212C_mRNA
SDH2	10.1497	2.6774	0.75992	3.52326	0.000426272	0.00414892	TRUE	UP	YLL041C		NA.35	8.80279	2.67823	0.798128	3.35564	0.000791809	0.0060851	TRUE	UP	YHR097C_mRNA
NA.14	30.9714	2.6733	0.509825	5.24356	1.57505e-07	4.44734e-06	TRUE	UP	YKL103C		BDH2	23.5428	2.6569	0.526406	5.04724	4.48245e-07	1.15268e-05	TRUE	UP	YAL061W_mRNA
YAK1	5.577	2.67201	1.01481	2.63303	0.00846274	0.0470078	TRUE	UP	YJL141C		STP4	8.65652	2.6548	0.819114	3.24106	0.00119087	0.00832864	TRUE	UP	YDL048C_mRNA
GLR1	24.6776	2.66356	0.530712	5.01884	5.19839e-07	1.26812e-05	TRUE	UP	YPL091W		COS111	5.81995	2.65237	0.978927	2.70946	0.00673919	0.0337262	TRUE	UP	YBR203W_mRNA
NDI1	24.9381	2.64954	0.540518	4.90186	9.49356e-07	2.05084e-05	TRUE	UP	YML120C		YET3	81.5314	2.60599	0.354163	7.35816	1.86467e-13	1.94799e-11	TRUE	UP	YDL072C_mRNA
NA.29	13.0061	2.64361	0.682551	3.87313	0.000107446	0.00131502	TRUE	UP	YNR040W		LDS2	6.61896	2.59598	0.902345	2.87693	0.00401564	0.0225618	TRUE	UP	YOL047C_mRNA
ZRT1	53.4055	2.64272	0.419799	6.2952	3.06996e-10	1.72014e-08	TRUE	UP	YGL255W		PRC1	116.389	2.59159	0.336527	7.70098	1.35028e-14	1.88083e-12	TRUE	UP	YMR297W_mRNA
RPN11	83.7954	2.64112	0.337361	7.82876	4.92695e-15	5.88934e-13	TRUE	UP	YFR004W		ERG10	90.7405	2.58623	0.345032	7.49561	6.59886e-14	7.60689e-12	TRUE	UP	YPL028W_mRNA
RNA15	8.60076	2.63772	0.819449	3.21889	0.00128689	0.0101966	TRUE	UP	YGL044C		YJU3	27.8098	2.57562	0.520433	4.94899	7.46014e-07	1.744e-05	TRUE	UP	YKL094W_mRNA
RTN2	8.20458	2.62094	0.835953	3.13528	0.00171691	0.0130441	TRUE	UP	YDL204W		SDH2	9.89076	2.57427	0.745785	3.45176	0.000556942	0.00454111	TRUE	UP	YLL041C_mRNA
NA.36	14.3095	2.61259	0.700212	3.73114	0.000190613	0.00211205	TRUE	UP	YJR115W		RPN11	81.3793	2.5712	0.352414	7.29597	2.9652e-13	2.91549e-11	TRUE	UP	YFR004W_mRNA
CDC4	6.9616	2.61176	0.889327	2.93679	0.00331634	0.0225235	TRUE	UP	YFL009W		SAC6	41.7591	2.56534	0.440893	5.8185	5.93768e-09	2.39153e-07	TRUE	UP	YDR129C_mRNA
MCY1	9.78051	2.60662	0.764085	3.41142	0.000646243	0.00586691	TRUE	UP	YGR012W		PDE1	20.1735	2.56006	0.559546	4.57524	4.75669e-06	7.57219e-05	TRUE	UP	YGL248W_mRNA
PRE2	49.0909	2.59598	0.412995	6.28574	3.263e-10	1.77598e-08	TRUE	UP	YPR103W		NAS2	21.0047	2.55984	0.544674	4.69976	2.60466e-06	4.72504e-05	TRUE	UP	YIL007C_mRNA
NA.63	8.19866	2.58783	0.836585	3.09333	0.00197927	0.014695	TRUE	UP	YCL048W-A		PNS1	22.7761	2.55701	0.551125	4.63961	3.49062e-06	5.98417e-05	TRUE	UP	YOR161C_mRNA
NA.32	12.2757	2.57685	0.683343	3.77094	0.000162633	0.00185733	TRUE	UP	YNL115C		HAM1	42.3578	2.55563	0.420205	6.08187	1.18789e-09	5.75526e-08	TRUE	UP	YJR069C_mRNA
APE4	12.9303	2.56507	0.687529	3.73086	0.000190827	0.00211205	TRUE	UP	YHR113W		MDH1	56.1677	2.53279	0.429904	5.89152	3.82652e-09	1.64001e-07	TRUE	UP	YKL085W_mRNA
MDH1	57.2981	2.55954	0.417167	6.13553	8.48782e-10	4.16949e-08	TRUE	UP	YKL085W		RNA15	8.3484	2.52114	0.805084	3.13153	0.00173899	0.0114664	TRUE	UP	YGL044C_mRNA
ARC35	44.9439	2.5589	0.411785	6.21416	5.16004e-10	2.60619e-08	TRUE	UP	YNR035C		NA.18	13.4446	2.51843	0.643076	3.91622	8.99484e-05	0.00100905	TRUE	UP	YBR139W_mRNA
MRK1	6.82904	2.54395	0.89453	2.84389	0.00445663	0.0284875	TRUE	UP	YDL079C		MRPL13	38.2407	2.51101	0.441283	5.69025	1.26856e-08	4.71199e-07	TRUE	UP	YKR006C_mRNA
NA.78	6.8585	2.52273	0.907846	2.7788	0.00545596	0.0333306	TRUE	UP	YMR265C		SBH2	123.005	2.5108	0.340512	7.3736	1.66082e-13	1.8507e-11	TRUE	UP	YER019C-A_mRNA
HEM3	13.2449	2.51201	0.657913	3.81815	0.000134459	0.00159658	TRUE	UP	YDL205C		ATG26	6.70219	2.50066	0.889834	2.81025	0.00495029	0.0265631	TRUE	UP	YLR189C_mRNA
STP4	9.25915	2.51077	0.786442	3.19256	0.00141016	0.0109455	TRUE	UP	YDL048C		APE1	30.2631	2.49879	0.506996	4.92863	8.28091e-07	1.87048e-05	TRUE	UP	YKL103C_mRNA
PML39	9.19545	2.48898	0.807924	3.08071	0.00206506	0.0152675	TRUE	UP	YML107C		GAL83	10.5009	2.4894	0.724334	3.43681	0.000588599	0.00476437	TRUE	UP	YER027C_mRNA
SSA4	10.1895	2.48605	0.735879	3.37834	0.000729258	0.00634738	TRUE	UP	YER103W		APE4	12.7606	2.48694	0.664338	3.74348	0.000181487	0.00183851	TRUE	UP	YHR113W_mRNA
STE50	6.30443	2.47824	0.940147	2.63602	0.00838855	0.0467102	TRUE	UP	YCL032W		NA.45	7.74608	2.48236	0.826177	3.00464	0.00265895	0.0160758	TRUE	UP	YCL048W-A_mRNA
KTR1	64.0352	2.43029	0.362648	6.70151	2.06274e-11	1.39566e-09	TRUE	UP	YOR099W		SOL1	10.4975	2.46351	0.712291	3.45857	0.000543056	0.0044496	TRUE	UP	YNR034W_mRNA
DAK1	9.94889	2.42739	0.746706	3.25079	0.00115084	0.00929487	TRUE	UP	YML070W		NA.20	14.3987	2.45058	0.631635	3.87973	0.000104571	0.00114242	TRUE	UP	YNR040W_mRNA
NA.40	12.4217	2.41758	0.672579	3.59449	0.000325029	0.00332066	TRUE	UP	YGR201C		CDC19	404.798	2.44713	0.360924	6.78019	1.20016e-11	8.72207e-10	TRUE	UP	YAL038W_mRNA
BDH2	24.9079	2.41092	0.50703	4.75497	1.98472e-06	3.88918e-05	TRUE	UP	YAL061W		ZRT1	52.4048	2.44666	0.412794	5.92708	3.08364e-09	1.3564e-07	TRUE	UP	YGL255W_mRNA
PET112	6.2685	2.39812	0.905615	2.64806	0.00809558	0.0456459	TRUE	UP	YBL080C		CDC4	7.70287	2.42897	0.814017	2.98393	0.00284571	0.0170794	TRUE	UP	YFL009W_mRNA
RIE1	12.1945	2.39594	0.680114	3.52285	0.000426925	0.00414892	TRUE	UP	YGR250C		EAF3	16.8834	2.42881	0.597544	4.06467	4.81014e-05	0.00059337	TRUE	UP	YPR023C_mRNA
SOL1	10.8895	2.39199	0.701712	3.40879	0.000652506	0.00590344	TRUE	UP	YNR034W		RIE1	11.5023	2.42717	0.691101	3.51204	0.000444684	0.00378264	TRUE	UP	YGR250C_mRNA
TIM11	111.281	2.39135	0.326947	7.3142	2.58923e-13	2.26463e-11	TRUE	UP	YDR322C-A		ARC35	44.3506	2.42333	0.420782	5.75911	8.45584e-09	3.21226e-07	TRUE	UP	YNR035C_mRNA
PRX1	8.55957	2.39122	0.817074	2.92656	0.00342733	0.0230337	TRUE	UP	YBL064C		PRE2	48.42	2.41889	0.413115	5.85524	4.76308e-09	1.99037e-07	TRUE	UP	YPR103W_mRNA
EAF3	17.388	2.39051	0.590155	4.05065	5.1075e-05	0.000675464	TRUE	UP	YPR023C		MRK1	6.45822	2.41597	0.881089	2.74203	0.00610612	0.0310224	TRUE	UP	YDL079C_mRNA
SBH2	44.1203	2.38405	0.409868	5.81663	6.00453e-09	2.39247e-07	TRUE	UP	YER019C-A		GGA1	16.266	2.41127	0.59929	4.02354	5.73287e-05	0.000694384	TRUE	UP	YDR358W_mRNA
AGP1	18.1707	2.37017	0.572719	4.13845	3.49659e-05	0.000491716	TRUE	UP	YCL025C		TPS1	72.7383	2.40464	0.393637	6.10878	1.00394e-09	4.99731e-08	TRUE	UP	YBR126C_mRNA
HSP82	32.4149	2.36334	0.467037	5.06028	4.18643e-07	1.04983e-05	TRUE	UP	YPL240C		NTH1	16.0539	2.40183	0.60605	3.96309	7.39844e-05	0.000858784	TRUE	UP	YDR001C_mRNA
RRT8	7.25582	2.35303	0.847393	2.77678	0.00548997	0.0334813	TRUE	UP	YOL048C		HRB1	19.1335	2.40005	0.594254	4.03876	5.37343e-05	0.000653214	TRUE	UP	YNL004W_mRNA
NTH1	16.5037	2.35202	0.603214	3.89915	9.65291e-05	0.00120735	TRUE	UP	YDR001C		STE50	7.34435	2.3954	0.848316	2.82372	0.00474704	0.0256785	TRUE	UP	YCL032W_mRNA
YIF1	28.1781	2.35071	0.495982	4.73951	2.14238e-06	4.12074e-05	TRUE	UP	YNL263C		GLR1	24.856	2.38875	0.531667	4.49294	7.02457e-06	0.000107707	TRUE	UP	YPL091W_mRNA
PTC6	7.98381	2.33357	0.818689	2.85037	0.00436686	0.0279635	TRUE	UP	YCR079W		NA.37	13.8414	2.37785	0.712274	3.3384	0.000842632	0.00635784	TRUE	UP	YJR115W_mRNA
MDG1	33.9967	2.3234	0.45929	5.05867	4.22187e-07	1.05136e-05	TRUE	UP	YNL173C		RRT8	7.52991	2.36146	0.827026	2.85536	0.00429885	0.0237146	TRUE	UP	YOL048C_mRNA
RFA2	48.1706	2.32303	0.439173	5.28957	1.22605e-07	3.54567e-06	TRUE	UP	YNL312W		HEM12	27.3654	2.35681	0.497917	4.73334	2.20854e-06	4.10175e-05	TRUE	UP	YDR047W_mRNA
ATG26	7.15287	2.3185	0.862665	2.6876	0.00719681	0.0417601	TRUE	UP	YLR189C		FUB1	7.16565	2.34853	0.842301	2.78823	0.00529973	0.0278569	TRUE	UP	YCR076C_mRNA
NAS2	15.3814	2.3167	0.608046	3.81008	0.000138924	0.00163338	TRUE	UP	YIL007C		OTU1	13.504	2.34784	0.632266	3.71337	0.000204517	0.00201419	TRUE	UP	YFL044C_mRNA
NTH2	11.975	2.31017	0.7286	3.17069	0.00152076	0.0116776	TRUE	UP	YBR001C		TIM11	107.891	2.33746	0.34469	6.78135	1.1906e-11	8.72207e-10	TRUE	UP	YDR322C-A_mRNA
HRB1	20.0145	2.3064	0.584475	3.9461	7.94337e-05	0.00100653	TRUE	UP	YNL004W		KTR1	61.8322	2.33701	0.379494	6.15822	7.35682e-10	3.90378e-08	TRUE	UP	YOR099W_mRNA
FMP48	6.89524	2.30486	0.853832	2.69943	0.00694576	0.0405	TRUE	UP	YGR052W		NA.31	12.1917	2.32549	0.66386	3.50299	0.000460073	0.00389373	TRUE	UP	YGR201C_mRNA
MHF1	44.0717	2.30085	0.399577	5.75822	8.50075e-09	3.31344e-07	TRUE	UP	YOL086W-A		PRP40	22.7938	2.31985	0.548781	4.22728	2.36531e-05	0.000318841	TRUE	UP	YKL012W_mRNA
NA.69	8.12595	2.28799	0.790854	2.89306	0.0038151	0.0251026	TRUE	UP	YBR139W		PRE7	74.2096	2.31816	0.360803	6.425	1.31868e-10	8.8167e-09	TRUE	UP	YBL041W_mRNA
SBE22	15.7182	2.28757	0.602785	3.79501	0.000147638	0.00172453	TRUE	UP	YHR103W		FMP25	7.40622	2.31721	0.822164	2.81842	0.00482599	0.0259795	TRUE	UP	YLR077W_mRNA
INH1	126.729	2.28436	0.301334	7.58081	3.434e-14	3.50606e-12	TRUE	UP	YDL181W		NNR2	13.412	2.28364	0.650603	3.51004	0.000448033	0.00380146	TRUE	UP	YKL151C_mRNA
NNR2	14.5496	2.27658	0.626361	3.63462	0.000278391	0.00291052	TRUE	UP	YKL151C		RFA2	48.4378	2.27985	0.447561	5.09393	3.50709e-07	9.37937e-06	TRUE	UP	YNL312W_mRNA
PRE7	60.5568	2.27618	0.363526	6.2614	3.81535e-10	2.04207e-08	TRUE	UP	YBL041W		MHF1	46.4472	2.2773	0.410564	5.54676	2.91005e-08	1.00292e-06	TRUE	UP	YOL086W-A_mRNA
GLC8	49.518	2.26633	0.387213	5.85293	4.82995e-09	1.96821e-07	TRUE	UP	YMR311C		AGP1	17.6221	2.2757	0.571963	3.97874	6.92802e-05	0.000818387	TRUE	UP	YCL025C_mRNA
CAT5	22.2387	2.26459	0.53364	4.24367	2.19892e-05	0.000331316	TRUE	UP	YOR125C		PTC6	7.80783	2.26872	0.800059	2.83569	0.00457275	0.0248161	TRUE	UP	YCR079W_mRNA
FUM1	29.6492	2.25652	0.46234	4.88065	1.05738e-06	2.25699e-05	TRUE	UP	YPL262W		YIF1	27.4296	2.25817	0.498324	4.53153	5.85575e-06	9.14756e-05	TRUE	UP	YNL263C_mRNA
RPT2	30.9385	2.25646	0.468793	4.81333	1.48434e-06	3.02434e-05	TRUE	UP	YDL007W		CHS3	11.2682	2.25697	0.674742	3.34494	0.000823008	0.00626724	TRUE	UP	YBR023C_mRNA
HEM12	28.8069	2.25057	0.472033	4.76783	1.86217e-06	3.66908e-05	TRUE	UP	YDR047W		NA.39	11.9371	2.25624	0.70329	3.20812	0.00133604	0.00919007	TRUE	UP	YJR085C_mRNA
MGR3	6.90677	2.24336	0.852597	2.63121	0.00850826	0.0470843	TRUE	UP	YMR115W		NA.28	13.4604	2.25607	0.630652	3.57737	0.000347075	0.00309406	TRUE	UP	YIR016W_mRNA
PNC1	53.6679	2.24124	0.368492	6.0822	1.18543e-09	5.66793e-08	TRUE	UP	YGL037C		MDG1	33.0215	2.25274	0.45779	4.9209	8.61483e-07	1.90724e-05	TRUE	UP	YNL173C_mRNA
TPS1	77.2428	2.23604	0.339743	6.58158	4.65469e-11	2.92837e-09	TRUE	UP	YBR126C		XRN1	6.67049	2.25259	0.855851	2.63199	0.00848863	0.0404238	TRUE	UP	YGL173C_mRNA
CIT1	23.0281	2.23577	0.513984	4.34989	1.36204e-05	0.000216118	TRUE	UP	YNR001C		GLC8	48.6332	2.24099	0.395708	5.66324	1.48541e-08	5.45683e-07	TRUE	UP	YMR311C_mRNA
SHH4	10.9124	2.21706	0.683458	3.24389	0.0011791	0.0094592	TRUE	UP	YLR164W		CAT5	21.992	2.22404	0.527824	4.21359	2.5134e-05	0.000337442	TRUE	UP	YOR125C_mRNA
BEM2	8.83975	2.17491	0.771507	2.81905	0.00481665	0.0300915	TRUE	UP	YER155C		SSA4	10.0166	2.2209	0.703122	3.15862	0.00158517	0.0106197	TRUE	UP	YER103W_mRNA
NA.54	13.2022	2.17383	0.661936	3.28405	0.00102329	0.00841629	TRUE	UP	YNL165W		FMP48	6.65621	2.21392	0.837666	2.64296	0.00821838	0.039588	TRUE	UP	YGR052W_mRNA
NA.15	39.3221	2.16286	0.414693	5.21557	1.83258e-07	5.02249e-06	TRUE	UP	YLR257W		MGR3	6.86311	2.17988	0.830035	2.62625	0.0086332	0.0409954	TRUE	UP	YMR115W_mRNA
UGA2	14.3502	2.15547	0.624072	3.45388	0.000552587	0.00510783	TRUE	UP	YBR006W		NA.9	36.4918	2.17453	0.440398	4.93765	7.90683e-07	1.81045e-05	TRUE	UP	YLR257W_mRNA
UBI4	21.9013	2.15425	0.524412	4.10793	3.99221e-05	0.000546414	TRUE	UP	YLL039C		NA.2	224.614	2.16972	0.365501	5.93629	2.91544e-09	1.30872e-07	TRUE	UP	YLR154W-F_mRNA
NBA1	7.37613	2.15411	0.813195	2.64895	0.00807422	0.0455971	TRUE	UP	YOL070C		INH1	123.446	2.16896	0.327782	6.61708	3.6637e-11	2.55162e-09	TRUE	UP	YDL181W_mRNA
YRB1	459.518	2.14452	0.263583	8.13602	4.08497e-16	6.369e-14	TRUE	UP	YDR002W		DAK1	9.96232	2.16233	0.711085	3.04089	0.00235877	0.0146296	TRUE	UP	YML070W_mRNA
PUP1	53.7207	2.12661	0.384104	5.53655	3.08491e-08	1.04363e-06	TRUE	UP	YOR157C		DDP1	28.4913	2.16157	0.485852	4.44902	8.62612e-06	0.000129897	TRUE	UP	YOR163W_mRNA
MVD1	23.5336	2.1235	0.526976	4.0296	5.5872e-05	0.000728571	TRUE	UP	YNR043W		FUM1	28.9715	2.15923	0.465269	4.64082	3.47025e-06	5.97992e-05	TRUE	UP	YPL262W_mRNA
MGR2	30.2049	2.12204	0.501098	4.23478	2.28771e-05	0.000341822	TRUE	UP	YPL098C		RCR2	19.1088	2.15752	0.557029	3.87326	0.00010739	0.0011694	TRUE	UP	YDR003W_mRNA
HAP4	19.4118	2.09716	0.551699	3.80128	0.00014395	0.00168694	TRUE	UP	YKL109W		ENT3	15.0711	2.14852	0.595961	3.60514	0.000311985	0.00283414	TRUE	UP	YJR125C_mRNA
CHS3	11.1098	2.09594	0.681228	3.07671	0.00209302	0.0154119	TRUE	UP	YBR023C		CIT1	22.2471	2.14533	0.512605	4.18515	2.84984e-05	0.000376562	TRUE	UP	YNR001C_mRNA
CPS1	23.2926	2.07654	0.592351	3.5056	0.000455586	0.00435662	TRUE	UP	YJL172W		MPM1	12.8006	2.13363	0.630691	3.383	0.000716981	0.00561328	TRUE	UP	YJL066C_mRNA
GCG1	14.5246	2.07239	0.617021	3.35871	0.000783077	0.00671798	TRUE	UP	YER163C		HSP82	32.558	2.12125	0.462195	4.58951	4.44282e-06	7.10726e-05	TRUE	UP	YPL240C_mRNA
LSC2	42.9213	2.05823	0.416882	4.9372	7.92527e-07	1.78742e-05	TRUE	UP	YGR244C		PRX1	11.0763	2.12082	0.690104	3.07318	0.00211787	0.0135926	TRUE	UP	YBL064C_mRNA
TIM17	28.4417	2.05811	0.510097	4.03473	5.46652e-05	0.000715436	TRUE	UP	YJL143W		RPT2	30.105	2.11699	0.45909	4.61127	4.00226e-06	6.65649e-05	TRUE	UP	YDL007W_mRNA
AHA1	38.3092	2.03834	0.414314	4.9198	8.6631e-07	1.89426e-05	TRUE	UP	YDR214W		SEC12	15.1248	2.11124	0.600696	3.51466	0.000440317	0.00377137	TRUE	UP	YNR026C_mRNA
RFS1	46.8222	2.03677	0.377218	5.39946	6.6841e-08	2.12117e-06	TRUE	UP	YBR052C		PNC1	53.7959	2.08182	0.376505	5.52933	3.21457e-08	1.08549e-06	TRUE	UP	YGL037C_mRNA
NA.57	12.7943	2.02825	0.626607	3.23687	0.00120847	0.00965157	TRUE	UP	YBL086C		NTH2	11.2863	2.07466	0.721344	2.8761	0.00402618	0.0225827	TRUE	UP	YBR001C_mRNA
NA.56	12.7994	2.01969	0.621578	3.24929	0.00115693	0.00932301	TRUE	UP	YIR016W		UGA2	14.0801	2.07443	0.6152	3.37196	0.000746344	0.00580239	TRUE	UP	YBR006W_mRNA
SFA1	9.76274	2.01361	0.704425	2.85851	0.00425632	0.0275509	TRUE	UP	YDL168W		NBA1	7.32002	2.07387	0.794624	2.60988	0.00905734	0.0424088	TRUE	UP	YOL070C_mRNA
GLK1	24.0875	2.01222	0.486531	4.13585	3.53637e-05	0.000495369	TRUE	UP	YCL040W		MIG2	10.2187	2.06772	0.707462	2.92272	0.00346984	0.0200687	TRUE	UP	YGL209W_mRNA
ASI2	12.7277	2.01213	0.62673	3.21052	0.00132497	0.0104632	TRUE	UP	YNL159C		ASI2	12.2911	2.06085	0.633411	3.25357	0.00113964	0.00800379	TRUE	UP	YNL159C_mRNA
NA.12	87.0963	2.00804	0.357988	5.60923	2.03229e-08	7.28778e-07	TRUE	UP	snR30		SQT1	24.2995	2.05911	0.528956	3.89278	9.91002e-05	0.0010862	TRUE	UP	YIR012W_mRNA
SQT1	25.2808	1.99634	0.512135	3.89806	9.69654e-05	0.00120735	TRUE	UP	YIR012W		LSC2	40.9451	2.05725	0.435904	4.7195	2.36422e-06	4.36662e-05	TRUE	UP	YGR244C_mRNA
CRH1	26.9766	1.9923	0.464921	4.28526	1.82529e-05	0.000280923	TRUE	UP	YGR189C		SHH4	11.2776	2.05507	0.648004	3.17139	0.00151713	0.0102253	TRUE	UP	YLR164W_mRNA
ARP3	41.8869	1.9895	0.443193	4.48901	7.1556e-06	0.00012219	TRUE	UP	YJR065C		PML1	12.2419	2.0482	0.63273	3.23708	0.00120761	0.00841052	TRUE	UP	YLR016C_mRNA
SEH1	10.4149	1.9851	0.707554	2.80558	0.00502257	0.0312148	TRUE	UP	YGL100W		YGP1	22.6437	2.0401	0.491156	4.15368	3.2717e-05	0.000422289	TRUE	UP	YNL160W_mRNA
CIT2	196.396	1.98477	0.743974	2.66779	0.00763511	0.0435286	TRUE	UP	YCR005C		YTA7	11.3719	2.03599	0.654632	3.11013	0.00187003	0.0121862	TRUE	UP	YGR270W_mRNA
RER2	15.1029	1.98212	0.599009	3.30899	0.000936322	0.00778595	TRUE	UP	YBR002C		RFS1	44.716	2.03556	0.390834	5.20825	1.90631e-07	5.48433e-06	TRUE	UP	YBR052C_mRNA
UGP1	12.376	1.97376	0.654546	3.01546	0.00256592	0.0182136	TRUE	UP	YKL035W		MVD1	22.9641	2.03018	0.527009	3.85226	0.000117032	0.001258	TRUE	UP	YNR043W_mRNA
SPG5	48.4592	1.96491	0.404656	4.85576	1.19924e-06	2.50028e-05	TRUE	UP	YMR191W		YRB1	451.499	2.0281	0.282748	7.17282	7.34677e-13	6.82229e-11	TRUE	UP	YDR002W_mRNA
RMR1	11.6983	1.95233	0.688996	2.83358	0.00460291	0.0290599	TRUE	UP	YGL250W		SBE22	15.7828	2.02661	0.583507	3.47316	0.000514363	0.00424699	TRUE	UP	YHR103W_mRNA
SEC62	60.8072	1.93496	0.362821	5.33309	9.65529e-08	2.93423e-06	TRUE	UP	YPL094C		MGR2	29.6415	2.01773	0.509093	3.96337	7.38986e-05	0.000858784	TRUE	UP	YPL098C_mRNA
NA.64	14.0056	1.90985	0.620056	3.08012	0.00206916	0.0152675	TRUE	UP	YEL047C		RPB2	18.9887	2.01705	0.531401	3.79572	0.000147216	0.0015284	TRUE	UP	YOR151C_mRNA
AI1	54.5351	1.90854	0.387531	4.92487	8.44164e-07	1.85716e-05	TRUE	UP	Q0050		TIM17	54.3172	2.01116	0.410503	4.89927	9.61929e-07	2.07466e-05	TRUE	UP	YJL143W_mRNA
HAP2	10.1459	1.8903	0.720425	2.62387	0.00869382	0.0479631	TRUE	UP	YGL237C		KTR3	21.4059	1.99957	0.554062	3.60894	0.000307455	0.0028006	TRUE	UP	YBR205W_mRNA
ENT3	16.4091	1.88891	0.569606	3.31617	0.000912602	0.00764624	TRUE	UP	YJR125C		YAK1	12.1104	1.99635	0.682543	2.92486	0.00344606	0.0199656	TRUE	UP	YJL141C_mRNA
SAH1	323.523	1.88647	0.26157	7.2121	5.5096e-13	4.59475e-11	TRUE	UP	YER043C		CDC48	46.7129	1.99443	0.400318	4.98212	6.28924e-07	1.52978e-05	TRUE	UP	YDL126C_mRNA
RPT5	45.6478	1.87472	0.378314	4.95546	7.21609e-07	1.66948e-05	TRUE	UP	YOR117W		NA.40	13.6484	1.99367	0.633284	3.14814	0.00164312	0.0109219	TRUE	UP	YNL165W_mRNA
SNF7	15.4304	1.87432	0.585365	3.20197	0.00136489	0.0106867	TRUE	UP	YLR025W		RER2	14.5114	1.9904	0.602102	3.30575	0.000947239	0.00697494	TRUE	UP	YBR002C_mRNA
VPS60	23.5689	1.8729	0.481194	3.89219	9.93434e-05	0.00122843	TRUE	UP	YDR486C		CRH1	26.1192	1.98066	0.470822	4.20682	2.5899e-05	0.000346321	TRUE	UP	YGR189C_mRNA
RPB2	20.1179	1.86873	0.51068	3.65931	0.000252897	0.0026831	TRUE	UP	YOR151C		DAL82	7.97432	1.9793	0.75049	2.63735	0.00835571	0.0399616	TRUE	UP	YNL314W_mRNA
DLD1	33.6743	1.86343	0.431781	4.31569	1.59107e-05	0.00024884	TRUE	UP	YDL174C		NA.55	9.11962	1.97873	0.716887	2.76017	0.0057771	0.029755	TRUE	UP	YMR265C_mRNA
CDC48	49.4058	1.85608	0.374036	4.96229	6.96673e-07	1.63286e-05	TRUE	UP	YDL126C		HAP4	18.434	1.9708	0.544508	3.61941	0.000295271	0.00273349	TRUE	UP	YKL109W_mRNA
PMT2	27.208	1.85351	0.471884	3.9279	8.56901e-05	0.00107819	TRUE	UP	YAL023C		RML2	11.7472	1.96617	0.687285	2.86077	0.00422609	0.0235072	TRUE	UP	YEL050C_mRNA
COM2	20.668	1.85317	0.528562	3.50606	0.00045479	0.00435662	TRUE	UP	YER130C		RGD1	9.94946	1.96577	0.687798	2.85807	0.0042623	0.0235908	TRUE	UP	YBR260C_mRNA
IDH1	65.4368	1.84569	0.347548	5.31062	1.09253e-07	3.23786e-06	TRUE	UP	YNL037C		UBI4	24.0391	1.9634	0.48573	4.04217	5.29592e-05	0.00064614	TRUE	UP	YLL039C_mRNA
TCB3	54.0212	1.83253	0.378079	4.84695	1.25374e-06	2.59878e-05	TRUE	UP	YML072C		PET10	14.2141	1.96073	0.595724	3.29134	0.000997117	0.00723072	TRUE	UP	YKR046C_mRNA
BCH1	17.7084	1.83239	0.552877	3.31429	0.000918775	0.00768002	TRUE	UP	YMR237W		PUP1	53.4556	1.95927	0.387818	5.05202	4.37151e-07	1.13286e-05	TRUE	UP	YOR157C_mRNA
PDC1	57.4503	1.80411	0.366002	4.92923	8.25563e-07	1.82961e-05	TRUE	UP	YLR044C		PMT1	24.3875	1.95566	0.52285	3.74039	0.000183736	0.00184453	TRUE	UP	YDL095W_mRNA
RPT6	13.4629	1.79758	0.633794	2.83621	0.00456517	0.0289235	TRUE	UP	YGL048C		AHA1	37.4668	1.94642	0.420783	4.6257	3.73328e-06	6.3032e-05	TRUE	UP	YDR214W_mRNA
HPF1	28.6996	1.79663	0.442352	4.06154	4.87509e-05	0.000647484	TRUE	UP	YOL155C		COM2	19.8262	1.94266	0.548245	3.54342	0.00039498	0.00342077	TRUE	UP	YER130C_mRNA
YGP1	26.5561	1.79464	0.4536	3.95645	7.60733e-05	0.000967372	TRUE	UP	YNL160W		NA.42	12.3994	1.93326	0.618719	3.12461	0.00178038	0.0116702	TRUE	UP	YBL086C_mRNA
RPN6	89.0038	1.79111	0.338466	5.29184	1.21089e-07	3.53028e-06	TRUE	UP	YDL097C		GCG1	14.6723	1.92921	0.591878	3.25946	0.00111623	0.00788373	TRUE	UP	YER163C_mRNA
PST2	166.188	1.78671	0.40632	4.39729	1.0961e-05	0.00017948	TRUE	UP	YDR032C		RPT6	12.8823	1.92556	0.637287	3.02149	0.00251532	0.0153724	TRUE	UP	YGL048C_mRNA
RRT15	19.9523	1.78004	0.505821	3.51911	0.000432993	0.00418521	TRUE	UP	YLR162W-A		SEH1	10.404	1.92487	0.696537	2.76348	0.00571887	0.0296406	TRUE	UP	YGL100W_mRNA
FKS1	32.0101	1.77762	0.43243	4.11076	3.94354e-05	0.000541821	TRUE	UP	YLR342W		SMC1	8.83317	1.92031	0.727533	2.63948	0.00830322	0.0398817	TRUE	UP	YFL008W_mRNA
SDD2	127.751	1.76277	0.308622	5.71174	1.11825e-08	4.22109e-07	TRUE	UP	YMR074C		DLD1	32.2133	1.91489	0.447648	4.27766	1.8887e-05	0.000260905	TRUE	UP	YDL174C_mRNA
MRPL10	25.2575	1.75566	0.517033	3.39565	0.000684652	0.00610737	TRUE	UP	YNL284C		CIT2	194.031	1.91349	0.45087	4.244	2.19567e-05	0.000297171	TRUE	UP	YCR005C_mRNA
TAD2	13.6947	1.75113	0.66252	2.64313	0.0082143	0.0460978	TRUE	UP	YJL035C		HAP2	10.3342	1.91304	0.693568	2.75825	0.00581113	0.0298412	TRUE	UP	YGL237C_mRNA
GLN1	209.932	1.75088	0.26931	6.50134	7.96075e-11	4.92194e-09	TRUE	UP	YPR035W		SFA1	9.51276	1.90127	0.692156	2.74688	0.00601656	0.0306999	TRUE	UP	YDL168W_mRNA
HSL1	12.6011	1.74182	0.625868	2.78305	0.00538512	0.0330103	TRUE	UP	YKL101W		RPL10	1270.99	1.89644	0.299397	6.33419	2.38599e-10	1.42435e-08	TRUE	UP	YLR075W_mRNA
RGD1	10.4298	1.74122	0.666898	2.61092	0.0090299	0.0493616	TRUE	UP	YBR260C		CPS1	22.8681	1.89616	0.575897	3.29253	0.000992915	0.0072159	TRUE	UP	YJL172W_mRNA
CIS3	33.5604	1.74091	0.42649	4.08194	4.46606e-05	0.000602079	TRUE	UP	YJL158C		SPG5	47.1892	1.89507	0.406022	4.66741	3.05026e-06	5.36685e-05	TRUE	UP	YMR191W_mRNA
SUP35	35.5098	1.74011	0.459941	3.78333	0.000154747	0.00177291	TRUE	UP	YDR172W		RMR1	11.3788	1.8915	0.673445	2.80869	0.00497441	0.0266071	TRUE	UP	YGL250W_mRNA
RPL3	88.3298	1.73162	0.328173	5.27653	1.31655e-07	3.77692e-06	TRUE	UP	YOR063W		MTQ2	8.35729	1.87971	0.739593	2.54155	0.0110361	0.0493654	TRUE	UP	YDR140W_mRNA
TPO3	16.3072	1.73087	0.562819	3.07535	0.00210255	0.0154503	TRUE	UP	YPR156C		BCH1	16.9943	1.86243	0.561546	3.31662	0.000911143	0.00675377	TRUE	UP	YMR237W_mRNA
RIP1	11.6519	1.72831	0.633995	2.72605	0.00640965	0.0381811	TRUE	UP	YEL024W		SEC62	59.4405	1.84858	0.380958	4.85247	1.21934e-06	2.45557e-05	TRUE	UP	YPL094C_mRNA
CYR1	11.7473	1.7237	0.63743	2.70414	0.00684805	0.040126	TRUE	UP	YJL005W		RPT5	43.9943	1.84528	0.38818	4.75366	1.99764e-06	3.79439e-05	TRUE	UP	YOR117W_mRNA
TPI1	990.291	1.72152	0.226555	7.59868	2.99159e-14	3.15524e-12	TRUE	UP	YDR050C		CKA2	13.9029	1.84406	0.605236	3.04684	0.00231263	0.0144997	TRUE	UP	YOR061W_mRNA
ARC15	28.8528	1.71773	0.444551	3.86397	0.000111561	0.00135612	TRUE	UP	YIL062C		PEX2	13.1898	1.84405	0.621717	2.96606	0.00301639	0.0180068	TRUE	UP	YJL210W_mRNA
BOS1	16.1783	1.71442	0.562282	3.04904	0.00229572	0.0165643	TRUE	UP	YLR078C		UGP1	39.8782	1.84094	0.42576	4.3239	1.53296e-05	0.000217148	TRUE	UP	YKL035W_mRNA
PET10	12.4367	1.71266	0.620558	2.75988	0.00578231	0.035026	TRUE	UP	YKR046C		VMA1	46.0145	1.83872	0.408468	4.5015	6.74766e-06	0.000103951	TRUE	UP	YDL185W_mRNA
YAP1	28.5513	1.70434	0.446327	3.81858	0.000134224	0.00159658	TRUE	UP	YML007W		PMT2	26.3796	1.83779	0.471794	3.89532	9.80673e-05	0.00107842	TRUE	UP	YAL023C_mRNA
EFM4	16.7487	1.69479	0.546793	3.0995	0.00193847	0.0144219	TRUE	UP	YIL064W		TPO3	14.6587	1.82883	0.583805	3.13261	0.00173262	0.0114469	TRUE	UP	YPR156C_mRNA
MTM1	20.1948	1.68559	0.507502	3.32134	0.000895855	0.0075235	TRUE	UP	YGR257C		VPS60	22.4604	1.80477	0.485532	3.7171	0.000201523	0.00199317	TRUE	UP	YDR486C_mRNA
NA.46	23.5119	1.67918	0.49576	3.38708	0.000706408	0.00623946	TRUE	UP	YGR130C		PRO3	34.5868	1.80276	0.482429	3.73684	0.000186348	0.00185959	TRUE	UP	YER023W_mRNA
RCR1	22.0373	1.67542	0.487241	3.43858	0.000584778	0.00537696	TRUE	UP	YBR005W		HSP104	21.1164	1.79964	0.505044	3.56334	0.000366161	0.00322125	TRUE	UP	YLL026W_mRNA
ORM2	52.8528	1.67462	0.400429	4.18206	2.88882e-05	0.000419406	TRUE	UP	YLR350W		NBP2	10.077	1.79842	0.675091	2.66397	0.00772251	0.0375238	TRUE	UP	YDR162C_mRNA
CWP2	2382.55	1.67454	0.252171	6.64051	3.12597e-11	2.00174e-09	TRUE	UP	YKL096W-A		ARP3	42.602	1.79438	0.434269	4.13195	3.59696e-05	0.000460714	TRUE	UP	YJR065C_mRNA
KRS1	125.242	1.66444	0.316961	5.25124	1.51076e-07	4.29966e-06	TRUE	UP	YDR037W		PST2	161.581	1.79373	0.458753	3.91002	9.22891e-05	0.00102841	TRUE	UP	YDR032C_mRNA
MIA40	87.9912	1.65918	0.34096	4.86619	1.13773e-06	2.3859e-05	TRUE	UP	YKL195W		SNF7	15.4211	1.79028	0.581288	3.07985	0.00207106	0.0134177	TRUE	UP	YLR025W_mRNA
PRE10	92.0641	1.6575	0.332225	4.98908	6.06678e-07	1.45036e-05	TRUE	UP	YOR362C		CWP1	120.142	1.78618	0.347174	5.14492	2.6763e-07	7.39411e-06	TRUE	UP	YKL096W_mRNA
ADH3	88.4649	1.63922	0.313595	5.22719	1.72108e-07	4.78433e-06	TRUE	UP	YMR083W		GPT2	9.99112	1.77529	0.698103	2.54302	0.0109898	0.049342	TRUE	UP	YKR067W_mRNA
YIP5	28.0538	1.62601	0.457994	3.55028	0.000384819	0.00384391	TRUE	UP	YGL161C		VPS51	15.1219	1.77226	0.583132	3.03922	0.00237195	0.0146841	TRUE	UP	YKR020W_mRNA
PUP3	83.3087	1.6232	0.313035	5.18534	2.15617e-07	5.81354e-06	TRUE	UP	YER094C		TCB3	52.2458	1.77139	0.385155	4.59918	4.24166e-06	6.95091e-05	TRUE	UP	YML072C_mRNA
TPM1	399.193	1.62218	0.292494	5.54603	2.92228e-08	9.98029e-07	TRUE	UP	YNL079C		IDH1	67.3027	1.76019	0.356624	4.93569	7.98683e-07	1.81632e-05	TRUE	UP	YNL037C_mRNA
RPF1	20.6971	1.61688	0.507526	3.1858	0.00144356	0.0111806	TRUE	UP	YHR088W		FRD1	13.8767	1.75723	0.602139	2.91831	0.00351939	0.0202501	TRUE	UP	YEL047C_mRNA
KRE2	119.551	1.61191	0.32681	4.93225	8.1287e-07	1.82184e-05	TRUE	UP	YDR483W		CSL4	9.77847	1.75594	0.670935	2.61715	0.00886668	0.041801	TRUE	UP	YNL232W_mRNA
HSP104	21.9932	1.60706	0.499007	3.22052	0.00127959	0.0101743	TRUE	UP	YLL026W		SAH1	318.286	1.75155	0.290378	6.03199	1.61955e-09	7.73453e-08	TRUE	UP	YER043C_mRNA
STH1	35.0576	1.60551	0.467709	3.43272	0.000597568	0.00546653	TRUE	UP	YIL126W		CYR1	11.1403	1.74832	0.635417	2.75145	0.00593315	0.030328	TRUE	UP	YJL005W_mRNA
ERG13	108.159	1.59722	0.349446	4.57071	4.86063e-06	8.42052e-05	TRUE	UP	YML126C		CIS3	32.4575	1.74727	0.431673	4.04767	5.17301e-05	0.000633457	TRUE	UP	YJL158C_mRNA
EFT1	205.008	1.59601	0.279362	5.71307	1.10953e-08	4.22109e-07	TRUE	UP	YOR133W		YRO2	76.9994	1.74471	0.35437	4.92342	8.50436e-07	1.89586e-05	TRUE	UP	YBR054W_mRNA
AI2	50.639	1.59456	0.393726	4.04992	5.12343e-05	0.000675464	TRUE	UP	Q0055		HPF1	28.5329	1.74159	0.454761	3.82967	0.000128314	0.00137045	TRUE	UP	YOL155C_mRNA
VPS51	15.2307	1.58188	0.571878	2.76611	0.00567291	0.0345383	TRUE	UP	YKR020W		YAP1	27.1887	1.73889	0.457397	3.80171	0.000143701	0.00149655	TRUE	UP	YML007W_mRNA
NA.47	66.0021	1.579	0.466183	3.38708	0.00070642	0.00623946	TRUE	UP	YJL055W		RPL3	84.8012	1.73399	0.340128	5.09806	3.43148e-07	9.25116e-06	TRUE	UP	YOR063W_mRNA
PGC1	55.6605	1.57556	0.431125	3.65452	0.000257661	0.00272559	TRUE	UP	YPL206C		HSL1	12.0647	1.73382	0.625585	2.77152	0.0055795	0.0289632	TRUE	UP	YKL101W_mRNA
RCK2	13.372	1.57254	0.590935	2.66111	0.00778842	0.0441919	TRUE	UP	YLR248W		RCR1	20.6353	1.72236	0.52153	3.30251	0.00095822	0.00702484	TRUE	UP	YBR005W_mRNA
NA.39	30.1657	1.57242	0.43236	3.63683	0.000276018	0.00289415	TRUE	UP	YDL124W		ORM2	55.1395	1.71943	0.395297	4.34971	1.36318e-05	0.000196427	TRUE	UP	YLR350W_mRNA
YPS1	20.9521	1.56246	0.508786	3.07096	0.00213374	0.0156474	TRUE	UP	YLR120C		GLN1	202.157	1.71453	0.287342	5.96684	2.41898e-09	1.12315e-07	TRUE	UP	YPR035W_mRNA
RHO1	111.626	1.55493	0.309538	5.02339	5.07668e-07	1.24692e-05	TRUE	UP	YPR165W		MRPL10	24.9507	1.70923	0.541371	3.15722	0.00159279	0.0106494	TRUE	UP	YNL284C_mRNA
YPT31	21.1595	1.55365	0.51694	3.00548	0.00265162	0.0187179	TRUE	UP	YER031C		MTM1	20.0018	1.70641	0.507177	3.36453	0.000766745	0.0059197	TRUE	UP	YGR257C_mRNA
NA.76	16.1839	1.54748	0.555347	2.78651	0.00532796	0.032772	TRUE	UP	YPL107W		TAD2	13.2929	1.70544	0.648572	2.62953	0.00855039	0.04066	TRUE	UP	YJL035C_mRNA
DAP1	27.1906	1.52844	0.455692	3.3541	0.000796244	0.00676619	TRUE	UP	YPL170W		DPB3	13.7871	1.70452	0.629938	2.70585	0.00681295	0.0339429	TRUE	UP	YBR278W_mRNA
THP3	18.613	1.52815	0.525127	2.91005	0.00361371	0.0240869	TRUE	UP	YPR045C		GID8	17.7748	1.699	0.572401	2.9682	0.00299548	0.0179139	TRUE	UP	YMR135C_mRNA
GSF2	21.893	1.50978	0.512424	2.94635	0.0032155	0.0219634	TRUE	UP	YML048W		KRS1	119.872	1.68154	0.333718	5.03881	4.68442e-07	1.18637e-05	TRUE	UP	YDR037W_mRNA
FPR1	364.644	1.50919	0.273897	5.51007	3.58688e-08	1.16932e-06	TRUE	UP	YNL135C		MAK3	14.8759	1.6806	0.611915	2.74646	0.00602426	0.0306999	TRUE	UP	YPR051W_mRNA
ARA1	21.798	1.50809	0.493916	3.05333	0.00226318	0.0164287	TRUE	UP	YBR149W		TPM1	383.148	1.67629	0.341992	4.90154	9.50875e-07	2.06414e-05	TRUE	UP	YNL079C_mRNA
SHE10	27.0228	1.49466	0.451764	3.3085	0.000937961	0.00778595	TRUE	UP	YGL228W		RPN6	87.5166	1.67562	0.339163	4.94046	7.79386e-07	1.79689e-05	TRUE	UP	YDL097C_mRNA
CAF40	19.5189	1.49392	0.499642	2.98998	0.00278996	0.0195406	TRUE	UP	YNL288W		ARC15	28.2717	1.67471	0.449889	3.72251	0.000197255	0.00195992	TRUE	UP	YIL062C_mRNA
15S_RRNA	810.202	1.4847	0.316801	4.68655	2.77851e-06	5.24408e-05	TRUE	UP	Q0020		RCN2	13.635	1.66398	0.593646	2.80299	0.00506318	0.026867	TRUE	UP	YOR220W_mRNA
NA.27	57.2726	1.47785	0.351602	4.2032	2.63166e-05	0.000386767	TRUE	UP	YOR052C		FKS1	39.7793	1.65745	0.402873	4.11408	3.88731e-05	0.000492246	TRUE	UP	YLR342W_mRNA
IPT1	19.5468	1.47636	0.505405	2.92115	0.00348743	0.0232885	TRUE	UP	YDR072C		SLT2	10.9591	1.65738	0.643955	2.57374	0.0100605	0.0461346	TRUE	UP	YHR030C_mRNA
CWP1	131.597	1.47511	0.307612	4.79535	1.62391e-06	3.23518e-05	TRUE	UP	YKL096W		NA.41	20.6169	1.64608	0.522881	3.1481	0.00164335	0.0109219	TRUE	UP	YLR297W_mRNA
COX9	155.652	1.45579	0.332039	4.38441	1.16301e-05	0.000188713	TRUE	UP	YDL067C		SUA7	11.8953	1.64444	0.623332	2.63815	0.00833596	0.0399242	TRUE	UP	YPR086W_mRNA
BDH1	30.5371	1.44192	0.508699	2.83453	0.00458928	0.029025	TRUE	UP	YAL060W		IPT1	18.0895	1.64146	0.534231	3.07256	0.00212231	0.0135926	TRUE	UP	YDR072C_mRNA
YRO2	78.3299	1.43637	0.326067	4.40515	1.05711e-05	0.0001755	TRUE	UP	YBR054W		COA6	31.6531	1.63616	0.487059	3.35927	0.000781497	0.00601969	TRUE	UP	YMR244C-A_mRNA
RTF1	20.5036	1.43358	0.493532	2.90474	0.00367555	0.0244084	TRUE	UP	YGL244W		BEM2	13.2083	1.63177	0.588339	2.77351	0.00554544	0.0288311	TRUE	UP	YER155C_mRNA
EFT2	380.362	1.41894	0.24608	5.76618	8.10879e-09	3.1954e-07	TRUE	UP	YDR385W		SDD2	126.56	1.62379	0.333332	4.87139	1.10816e-06	2.25889e-05	TRUE	UP	YMR074C_mRNA
BNA6	36.983	1.41295	0.39068	3.61665	0.000298443	0.00306652	TRUE	UP	YFR047C		PSD1	20.8085	1.62364	0.531054	3.05739	0.00223274	0.0141364	TRUE	UP	YNL169C_mRNA
MBF1	61.588	1.40687	0.347973	4.04305	5.27604e-05	0.000693036	TRUE	UP	YOR298C-A		SUP35	34.9209	1.61747	0.463669	3.48841	0.000485895	0.00408127	TRUE	UP	YDR172W_mRNA
NA.71	38.6443	1.40661	0.487801	2.88357	0.00393196	0.0257299	TRUE	UP	YJL068C		LSC1	79.8531	1.61474	0.464215	3.47844	0.000504341	0.00420012	TRUE	UP	YOR142W_mRNA
COA4	18.9181	1.40605	0.519849	2.70472	0.0068362	0.0401221	TRUE	UP	YLR218C		PRE10	91.5257	1.60995	0.349716	4.6036	4.15252e-06	6.83836e-05	TRUE	UP	YOR362C_mRNA
QCR6	66.9776	1.40232	0.327783	4.2782	1.88407e-05	0.000287501	TRUE	UP	YFR033C		TFA2	14.6601	1.60919	0.583	2.76019	0.0057767	0.029755	TRUE	UP	YKR062W_mRNA
OCH1	52.202	1.39858	0.369311	3.78699	0.00015248	0.00175608	TRUE	UP	YGL038C		SEC4	57.7373	1.59665	0.381871	4.18112	2.90071e-05	0.000379027	TRUE	UP	YFL005W_mRNA
MDH2	46.1313	1.3939	0.378097	3.68662	0.00022725	0.00245457	TRUE	UP	YOL126C		ERG13	103.865	1.59453	0.366572	4.34985	1.3623e-05	0.000196427	TRUE	UP	YML126C_mRNA
NA.72	41.4892	1.36072	0.475591	2.86111	0.0042216	0.0273755	TRUE	UP	YLR256W-A		MIA40	86.9288	1.57049	0.342193	4.58949	4.44336e-06	7.10726e-05	TRUE	UP	YKL195W_mRNA
RPN2	32.635	1.34792	0.434382	3.10306	0.00191529	0.0143088	TRUE	UP	YIL075C		TPI1	986.542	1.56807	0.262576	5.97189	2.34527e-09	1.10426e-07	TRUE	UP	YDR050C_mRNA
STI1	73.0422	1.34359	0.470494	2.85571	0.00429404	0.0277122	TRUE	UP	YOR027W		BOS1	17.441	1.56617	0.5344	2.93071	0.00338183	0.0196959	TRUE	UP	YLR078C_mRNA
TOA2	37.9307	1.33204	0.399971	3.33034	0.00086741	0.0073189	TRUE	UP	YKL058W		QCR6	63.8547	1.56108	0.396764	3.93454	8.33578e-05	0.000952348	TRUE	UP	YFR033C_mRNA
NA.49	37.4217	1.32412	0.391794	3.37964	0.000725812	0.00634738	TRUE	UP	YBR085C-A		IMP2.1	14.576	1.55779	0.58901	2.64475	0.00817505	0.039436	TRUE	UP	YIL154C_mRNA
TFG1	19.1591	1.31231	0.491414	2.67048	0.0075742	0.0433191	TRUE	UP	YGR186W		MBF1	403.747	1.55352	0.278351	5.58116	2.38923e-08	8.49703e-07	TRUE	UP	YOR298C-A_mRNA
SUR2	100.752	1.3107	0.440624	2.97465	0.00293326	0.0204246	TRUE	UP	YDR297W		YPS1	28.6948	1.55076	0.475968	3.25811	0.00112156	0.0078934	TRUE	UP	YLR120C_mRNA
PDB1	72.4795	1.30168	0.373232	3.48759	0.000487399	0.00461165	TRUE	UP	YBR221C		RPS2	1005.86	1.54695	0.302392	5.1157	3.12587e-07	8.49577e-06	TRUE	UP	YGL123W_mRNA
TEF1	1160.91	1.28855	0.304905	4.22608	2.37803e-05	0.000353842	TRUE	UP	YPR080W		YIP5	27.1332	1.54157	0.464617	3.31793	0.000906872	0.00673705	TRUE	UP	YGL161C_mRNA
PDA1	130.592	1.28038	0.414192	3.09127	0.00199301	0.0147664	TRUE	UP	YER178W		NA.36	64.1138	1.5385	0.460382	3.34178	0.000832421	0.00631017	TRUE	UP	YJL055W_mRNA
NIF3	29.9722	1.27649	0.426292	2.99441	0.00274978	0.0192969	TRUE	UP	YGL221C		RHO1	113.96	1.5374	0.321069	4.78838	1.68136e-06	3.249e-05	TRUE	UP	YPR165W_mRNA
BSD2	36.8078	1.27162	0.425891	2.98579	0.00282848	0.0197333	TRUE	UP	YBR290W		OCH1	50.6175	1.53436	0.413244	3.71296	0.000204853	0.00201419	TRUE	UP	YGL038C_mRNA
APA1	43.728	1.24643	0.408682	3.04988	0.0022893	0.0165513	TRUE	UP	YCL050C		PGC1	55.6448	1.53294	0.441984	3.46832	0.000523715	0.00430167	TRUE	UP	YPL206C_mRNA
EGD1	338.881	1.23539	0.25735	4.80042	1.58335e-06	3.18982e-05	TRUE	UP	YPL037C		THP3	18.7702	1.5301	0.517384	2.95738	0.00310268	0.0184232	TRUE	UP	YPR045C_mRNA
MNN5	26.7993	1.2267	0.462019	2.65508	0.00792898	0.0449184	TRUE	UP	YJL186W		RAD51	16.8271	1.52519	0.53721	2.8391	0.00452417	0.0246726	TRUE	UP	YER095W_mRNA
YCP4	127.853	1.21883	0.306442	3.97735	6.9687e-05	0.000892491	TRUE	UP	YCR004C		ATG8	14.2895	1.52075	0.565726	2.68814	0.00718512	0.0352833	TRUE	UP	YBL078C_mRNA
RPL15B	35.8074	1.21862	0.423233	2.87931	0.00398546	0.0259852	TRUE	UP	YMR121C		UBX6	13.1279	1.52018	0.598669	2.53927	0.0111084	0.0495801	TRUE	UP	YJL048C_mRNA
UBA1	53.1521	1.21466	0.402876	3.01497	0.00257002	0.0182136	TRUE	UP	YKL210W		ADH3	86.859	1.5201	0.324253	4.68801	2.7588e-06	4.95842e-05	TRUE	UP	YMR083W_mRNA
RPL8A	200.745	1.21282	0.256798	4.72284	2.32573e-06	4.43622e-05	TRUE	UP	YHL033C		PUP3	82.2194	1.5186	0.327176	4.64152	3.45857e-06	5.97992e-05	TRUE	UP	YER094C_mRNA
PEP4	41.5208	1.18799	0.388903	3.05474	0.00225259	0.016385	TRUE	UP	YPL154C		KRE2	117.139	1.51722	0.354464	4.28031	1.8663e-05	0.000258881	TRUE	UP	YDR483W_mRNA
TEF2	1149.74	1.17984	0.339334	3.47693	0.000507185	0.00476116	TRUE	UP	YBR118W		BCY1	12.6456	1.50773	0.588679	2.56121	0.0104309	0.0473786	TRUE	UP	YIL033C_mRNA
RPL18B	88.901	1.14323	0.297892	3.83773	0.000124179	0.00148931	TRUE	UP	YNL301C		RCK2	12.9412	1.48443	0.582277	2.54936	0.0107921	0.0486881	TRUE	UP	YLR248W_mRNA
SAM2	86.5813	1.1341	0.416715	2.72153	0.00649803	0.0384322	TRUE	UP	YDR502C		NHP6B	120.54	1.47373	0.321046	4.5904	4.42394e-06	7.10726e-05	TRUE	UP	YBR089C-A_mRNA
RAS2	72.818	1.12857	0.332588	3.39329	0.000690596	0.0061451	TRUE	UP	YNL098C		NA.33	30.3033	1.47072	0.43398	3.38892	0.000701686	0.00550642	TRUE	UP	YDL124W_mRNA
PHB2	126.998	1.06139	0.275877	3.84734	0.000119407	0.0014466	TRUE	UP	YGR231C		PRY2	24.5648	1.47022	0.540405	2.72058	0.0065167	0.0329083	TRUE	UP	YKR013W_mRNA
TSA1	901.011	1.04386	0.241348	4.32513	1.52442e-05	0.000240818	TRUE	UP	YML028W		CWP2	2566.06	1.46977	0.295056	4.98133	6.31498e-07	1.52978e-05	TRUE	UP	YKL096W-A_mRNA
RCF1	43.3391	1.03808	0.363799	2.85344	0.00432493	0.0277943	TRUE	UP	YML030W		BXI1	29.5733	1.46155	0.488852	2.98977	0.0027919	0.0167865	TRUE	UP	YNL305C_mRNA
FAS2	69.8717	1.03221	0.34113	3.02585	0.00247935	0.017711	TRUE	UP	YPL231W		MDH2	44.0072	1.45947	0.388837	3.75343	0.000174433	0.00177243	TRUE	UP	YOL126C_mRNA
LCB2	53.0676	1.01682	0.35113	2.89585	0.00378133	0.0249262	TRUE	UP	YDR062W		EFT2	365.728	1.45151	0.272673	5.32328	1.01915e-07	3.21417e-06	TRUE	UP	YDR385W_mRNA
HOR7	675.78	1.00993	0.248212	4.06882	4.72524e-05	0.000634634	TRUE	UP	YMR251W-A		GSF2	25.931	1.44454	0.463429	3.11707	0.00182659	0.0119281	TRUE	UP	YML048W_mRNA
ELO1	77.0137	1.00853	0.322135	3.13077	0.00174351	0.0132183	TRUE	UP	YJL196C		TMC1	54.7191	1.44008	0.360895	3.99031	6.59877e-05	0.000785042	TRUE	UP	YOR052C_mRNA
ATP4	43.431	0.996018	0.365598	2.72435	0.00644275	0.0383146	TRUE	UP	YPL078C		COA4	17.7471	1.43739	0.545275	2.63609	0.00838681	0.0400131	TRUE	UP	YLR218C_mRNA
RPT4	98.5683	0.966922	0.327524	2.95222	0.00315498	0.0216738	TRUE	UP	YOR259C		COX9	144.176	1.43654	0.358835	4.00333	6.24563e-05	0.000747364	TRUE	UP	YDL067C_mRNA
SOD1	167.131	0.956279	0.269782	3.54463	0.00039316	0.00389467	TRUE	UP	YJR104C		NA.60	15.462	1.43619	0.54771	2.62217	0.00873722	0.0413718	TRUE	UP	YPL107W_mRNA
ENO1	79.4939	0.927732	0.343818	2.69832	0.00696897	0.0405693	TRUE	UP	YGR254W		BDH1	29.4358	1.43319	0.498102	2.8773	0.0040109	0.0225618	TRUE	UP	YAL060W_mRNA
OPI3	120.113	0.901176	0.310844	2.89913	0.00374201	0.0247124	TRUE	UP	YJR073C		AIM41	17.1964	1.42925	0.529504	2.69922	0.00695018	0.0345237	TRUE	UP	YOR215C_mRNA
SIS1	83.0046	0.883462	0.308307	2.86553	0.00416314	0.0270453	TRUE	UP	YNL007C		STH1	35.2352	1.41908	0.434575	3.26544	0.00109295	0.00777393	TRUE	UP	YIL126W_mRNA
21S_RRNA	7571.85	0.869944	0.243697	3.56978	0.000357283	0.00357882	TRUE	UP	Q0158		RTF1	19.9466	1.41554	0.495164	2.85873	0.00425339	0.0235806	TRUE	UP	YGL244W_mRNA
YEF3	290.292	0.869097	0.267638	3.24728	0.00116512	0.00936798	TRUE	UP	YLR249W		FPR1	364.034	1.40849	0.303975	4.63358	3.59401e-06	6.09887e-05	TRUE	UP	YNL135C_mRNA
EFB1	980.432	0.816511	0.252982	3.22754	0.00124859	0.00994988	TRUE	UP	YAL003W		CAF40	19.0115	1.39267	0.496292	2.80616	0.00501359	0.0267585	TRUE	UP	YNL288W_mRNA
NA.89	1089.16	0.687207	0.262124	2.62169	0.00874948	0.048196	TRUE	UP	ETS1-1		MEO1	282.986	1.37892	0.34449	4.0028	6.25971e-05	0.000747364	TRUE	UP	YBR126W-A_mRNA
RPS5	1229.14	0.669184	0.255857	2.61546	0.00891073	0.048934	TRUE	UP	YJR123W		CAJ1	73.2449	1.37888	0.489142	2.81898	0.00481771	0.0259768	TRUE	UP	YER048C_mRNA
TDH3	4467.19	-0.658167	0.24927	-2.64037	0.0082815	0.0462577	TRUE	DOWN	YGR192C		GNA1	35.148	1.36562	0.4167	3.27722	0.00104834	0.00755302	TRUE	UP	YFL017C_mRNA
RPS8B	462.06	-0.690478	0.245762	-2.80954	0.00496127	0.0308874	TRUE	DOWN	YER102W		YPT31	26.3042	1.36296	0.448022	3.04217	0.00234878	0.0145948	TRUE	UP	YER031C_mRNA
RPS1A	469.591	-0.690614	0.238053	-2.9011	0.00371857	0.0246029	TRUE	DOWN	YLR441C		EFT1	202.278	1.36064	0.289154	4.70559	2.53128e-06	4.62408e-05	TRUE	UP	YOR133W_mRNA
HHT1	197.956	-0.735193	0.277319	-2.65108	0.00802357	0.0453825	TRUE	DOWN	YBR010W		NA.53	24.0404	1.35967	0.484586	2.80583	0.00501871	0.0267585	TRUE	UP	YGR130C_mRNA
ASC1	467.836	-0.755275	0.24319	-3.1057	0.00189829	0.0142412	TRUE	DOWN	YMR116C		DAP1	27.1484	1.35409	0.452017	2.99566	0.0027385	0.0164952	TRUE	UP	YPL170W_mRNA
HHF1	103.582	-0.784202	0.293838	-2.66883	0.00761169	0.0434642	TRUE	DOWN	YBR009C		NA.51	37.344	1.35227	0.476809	2.83607	0.00456722	0.0248161	TRUE	UP	YJL068C_mRNA
VMA3	270.783	-0.79244	0.267393	-2.96358	0.00304083	0.02097	TRUE	DOWN	YEL027W		TNA1	49.6956	1.3474	0.389704	3.4575	0.000545207	0.0044563	TRUE	UP	YGR260W_mRNA
RPL24A	283.485	-0.81189	0.268636	-3.02227	0.00250891	0.0178866	TRUE	DOWN	YGL031C		BNA6	37.0201	1.31811	0.395363	3.33393	0.000856268	0.00640381	TRUE	UP	YFR047C_mRNA
TMA19	481.214	-0.815555	0.244335	-3.33785	0.000844284	0.00714057	TRUE	DOWN	YKL056C		SHE10	26.5232	1.31177	0.444076	2.95393	0.00313758	0.0185317	TRUE	UP	YGL228W_mRNA
GCV3	118.016	-0.822882	0.276904	-2.97173	0.0029613	0.0205799	TRUE	DOWN	YAL044C		STI1	70.2819	1.30175	0.501103	2.59778	0.0093829	0.0437476	TRUE	UP	YOR027W_mRNA
RPS0B	294.143	-0.829047	0.262846	-3.15411	0.00160986	0.0123354	TRUE	DOWN	YLR048W		GND1	89.3621	1.29882	0.423981	3.0634	0.00218836	0.0139081	TRUE	UP	YHR183W_mRNA
RPS17A	665.858	-0.830614	0.252665	-3.28741	0.00101113	0.00833545	TRUE	DOWN	YML024W		MDE1	26.5622	1.29221	0.453197	2.85132	0.00435388	0.0239392	TRUE	UP	YJR024C_mRNA
RPS16A	296.163	-0.839834	0.276608	-3.03619	0.0023959	0.0172178	TRUE	DOWN	YMR143W		YCP4	120.695	1.28501	0.34346	3.74137	0.000183018	0.00184453	TRUE	UP	YCR004C_mRNA
SML1	77.7475	-0.860142	0.304399	-2.8257	0.00471773	0.0296803	TRUE	DOWN	YML058W		COX20	27.5323	1.27748	0.458956	2.78344	0.00537864	0.028095	TRUE	UP	YDR231C_mRNA
RPS17B	484.592	-0.861552	0.248487	-3.46719	0.000525921	0.00489858	TRUE	DOWN	YDR447C		NA.43	33.0003	1.2734	0.418138	3.04541	0.00232362	0.0144997	TRUE	UP	YBR085C-A_mRNA
TIF1	90.0674	-0.866253	0.30212	-2.86725	0.00414053	0.0269473	TRUE	DOWN	YKR059W		PDB1	69.3222	1.2709	0.387966	3.27581	0.00105361	0.00757467	TRUE	UP	YBR221C_mRNA
NA.68	261.593	-0.875462	0.299263	-2.92539	0.00344025	0.0230593	TRUE	DOWN	YDR524C-B		SUR2	97.8219	1.26769	0.435271	2.91242	0.00358638	0.0205689	TRUE	UP	YDR297W_mRNA
TIM10	95.3503	-0.886806	0.331246	-2.67718	0.00742438	0.0425982	TRUE	DOWN	YHR005C-A		COX4	17.8451	1.26548	0.498848	2.5368	0.011187	0.0497513	TRUE	UP	YGL187C_mRNA
DPM1	97.1483	-0.890752	0.304393	-2.92632	0.00343001	0.0230337	TRUE	DOWN	YPR183W		ARA1	25.0304	1.2649	0.494817	2.55629	0.0105795	0.0479882	TRUE	UP	YBR149W_mRNA
TOS1	140.839	-0.89283	0.304858	-2.92867	0.00340413	0.0229459	TRUE	DOWN	YBR162C		GPA2	26.6957	1.26484	0.452226	2.79692	0.00515918	0.0272898	TRUE	UP	YER020W_mRNA
RPL14B	206.466	-0.893443	0.263095	-3.39589	0.000684049	0.00610737	TRUE	DOWN	YHL001W		TOA2	38.4505	1.26364	0.398253	3.17295	0.00150901	0.0101912	TRUE	UP	YKL058W_mRNA
RPS1B	463.345	-0.904621	0.255931	-3.53463	0.000408349	0.00401189	TRUE	DOWN	YML063W		APA1	42.0781	1.26274	0.404049	3.12521	0.0017768	0.0116696	TRUE	UP	YCL050C_mRNA
SEC53	88.3044	-0.906706	0.310062	-2.92427	0.00345261	0.023099	TRUE	DOWN	YFL045C		AI1	144.848	1.25658	0.329899	3.809	0.000139528	0.00146679	TRUE	UP	Q0050_mRNA
RPS8A	352.799	-0.913699	0.250713	-3.64441	0.000268007	0.00282669	TRUE	DOWN	YBL072C		NA.61	19.8175	1.25457	0.484451	2.58968	0.00960655	0.0446037	TRUE	UP	YNL046W_mRNA
RPL7A	436.527	-0.917487	0.254708	-3.60211	0.000315641	0.00323397	TRUE	DOWN	YGL076C		RAS2	69.489	1.25229	0.370407	3.38085	0.000722622	0.00564422	TRUE	UP	YNL098C_mRNA
RPL19B	471.389	-0.923331	0.254351	-3.63015	0.000283261	0.00294916	TRUE	DOWN	YBL027W		NA.50	106.599	1.25205	0.437828	2.85967	0.00424078	0.0235497	TRUE	UP	YCR013C_mRNA
RPL31B	98.8036	-0.92344	0.297757	-3.10132	0.00192658	0.0143632	TRUE	DOWN	YLR406C		BSD2	38.3736	1.24741	0.471075	2.64801	0.00809676	0.0391148	TRUE	UP	YBR290W_mRNA
ADK1	137.333	-0.924767	0.278183	-3.32431	0.000886376	0.00746137	TRUE	DOWN	YDR226W		RPF1	22.081	1.23981	0.47383	2.61657	0.00888188	0.041801	TRUE	UP	YHR088W_mRNA
MMF1	295.531	-0.92626	0.341069	-2.71575	0.00661252	0.0390008	TRUE	DOWN	YIL051C		RPN2	32.1619	1.23473	0.435071	2.83799	0.00453987	0.0247179	TRUE	UP	YIL075C_mRNA
RPL42B	196.112	-0.929587	0.266341	-3.49022	0.00048263	0.0045786	TRUE	DOWN	YHR141C		PHB2	117.773	1.22847	0.328685	3.73754	0.000185832	0.00185959	TRUE	UP	YGR231C_mRNA
ACB1	111.356	-0.937666	0.292113	-3.20995	0.00132759	0.0104632	TRUE	DOWN	YGR037C		ITR1	25.245	1.22802	0.483236	2.54125	0.0110456	0.0493654	TRUE	UP	YDR497C_mRNA
RIM1	42.7285	-0.940663	0.35941	-2.61724	0.00886437	0.048754	TRUE	DOWN	YCR028C-A		PEP4	39.6108	1.2141	0.398579	3.04608	0.00231844	0.0144997	TRUE	UP	YPL154C_mRNA
RPS3	783.084	-0.945139	0.246205	-3.83883	0.00012362	0.00148759	TRUE	DOWN	YNL178W		NIF3	29.3437	1.21329	0.431667	2.8107	0.00494335	0.0265631	TRUE	UP	YGL221C_mRNA
RPS6A	379.313	-0.946397	0.252372	-3.75001	0.000176825	0.00198775	TRUE	DOWN	YPL090C		TEF1	1127.64	1.21021	0.31744	3.81241	0.000137617	0.00145586	TRUE	UP	YPR080W_mRNA
GON7	65.9431	-0.95468	0.316914	-3.01243	0.00259166	0.0183308	TRUE	DOWN	YJL184W		ATP1	65.2368	1.20336	0.378351	3.18053	0.00147006	0.0099822	TRUE	UP	YBL099W_mRNA
ARF1	172.714	-0.958617	0.26718	-3.5879	0.000333348	0.00336729	TRUE	DOWN	YDL192W		EFM4	28.2313	1.18837	0.443107	2.68191	0.00732035	0.0357777	TRUE	UP	YIL064W_mRNA
RPL38	932.85	-0.965583	0.255007	-3.78649	0.000152788	0.00175608	TRUE	DOWN	YLR325C		PDA1	128.196	1.18757	0.422795	2.80886	0.00497173	0.0266071	TRUE	UP	YER178W_mRNA
GUK1	58.2121	-0.96651	0.346701	-2.78774	0.00530776	0.0327038	TRUE	DOWN	YDR454C		RPL15B	34.3234	1.17157	0.435763	2.68854	0.00717651	0.0352833	TRUE	UP	YMR121C_mRNA
NA.74	81.9892	-0.979273	0.34444	-2.84309	0.00446787	0.0285085	TRUE	DOWN	YMR122W-A		CAM1	26.6214	1.17097	0.461738	2.53601	0.0112123	0.0497513	TRUE	UP	YPL048W_mRNA
NA.87	44.0438	-0.98765	0.369771	-2.67097	0.00756314	0.0433191	TRUE	DOWN	YCR051W		UBA1	52.0001	1.16321	0.397653	2.9252	0.00344238	0.0199656	TRUE	UP	YKL210W_mRNA
SAM1	96.4369	-0.988934	0.325456	-3.03861	0.00237672	0.0171143	TRUE	DOWN	YLR180W		OPI3	109.845	1.15685	0.382161	3.02712	0.00246892	0.0151442	TRUE	UP	YJR073C_mRNA
HTB1	84.7431	-0.993364	0.357429	-2.77919	0.00544946	0.0333306	TRUE	DOWN	YDR224C		SCEI	47.0725	1.156	0.376964	3.0666	0.0021651	0.0138128	TRUE	UP	Q0160_mRNA
SSS1	98.1441	-1.00077	0.33339	-3.0018	0.00268386	0.0188712	TRUE	DOWN	YDR086C		TEF2	1121.07	1.14862	0.354826	3.23714	0.00120736	0.00841052	TRUE	UP	YBR118W_mRNA
TMA22	49.2764	-1.00161	0.35124	-2.85163	0.00434956	0.0279025	TRUE	DOWN	YJR014W		RPL8A	196.42	1.13968	0.274694	4.14892	3.34052e-05	0.000429513	TRUE	UP	YHL033C_mRNA
TAE1	50.5175	-1.00413	0.340731	-2.94698	0.00320891	0.0219602	TRUE	DOWN	YBR261C		COB	82.0777	1.13589	0.407876	2.78489	0.00535451	0.028095	TRUE	UP	Q0105_mRNA
RPL9A	332.673	-1.00521	0.26539	-3.78766	0.000152073	0.00175608	TRUE	DOWN	YGL147C		EGD1	335.488	1.12755	0.285501	3.94935	7.83629e-05	0.000901509	TRUE	UP	YPL037C_mRNA
ERV14	55.4086	-1.01239	0.377893	-2.67905	0.00738321	0.0425459	TRUE	DOWN	YGL054C		FAS2	66.2707	1.12394	0.372185	3.01984	0.00252912	0.0154004	TRUE	UP	YPL231W_mRNA
NA.80	38.122	-1.01406	0.370637	-2.73598	0.00621945	0.0371716	TRUE	DOWN	YDR341C		NA.58	212.024	1.11223	0.418714	2.65629	0.00790054	0.0382221	TRUE	UP	YHR054W-A_mRNA
RPL32	557.607	-1.01783	0.262502	-3.8774	0.000105578	0.00129658	TRUE	DOWN	YBL092W		SAM2	83.029	1.09186	0.407107	2.682	0.00731834	0.0357777	TRUE	UP	YDR502C_mRNA
NOG1	35.9183	-1.0204	0.380982	-2.67835	0.00739865	0.0425459	TRUE	DOWN	YPL093W		ELO1	73.3188	1.08703	0.353575	3.07439	0.00210932	0.0135866	TRUE	UP	YJL196C_mRNA
MIM2	41.6444	-1.02087	0.364932	-2.79742	0.00515122	0.0319589	TRUE	DOWN	YLR099W-A		RPL18B	88.371	1.05372	0.318708	3.30621	0.000945657	0.00697494	TRUE	UP	YNL301C_mRNA
RPL30	461.78	-1.02179	0.251281	-4.06632	4.77611e-05	0.000639072	TRUE	DOWN	YGL030W		LCB2	50.0471	1.02033	0.363898	2.80389	0.005049	0.0268343	TRUE	UP	YDR062W_mRNA
RPL42A	340.389	-1.03069	0.287837	-3.58082	0.000342523	0.00345024	TRUE	DOWN	YNL162W		ATP4	42.6952	0.983681	0.375621	2.61882	0.00882355	0.0416626	TRUE	UP	YPL078C_mRNA
RPL1A	231.276	-1.03365	0.278354	-3.71345	0.000204456	0.00224214	TRUE	DOWN	YPL220W		TSA1	888.491	0.956932	0.277734	3.44551	0.000569993	0.00463622	TRUE	UP	YML028W_mRNA
RPS4B	178.799	-1.03399	0.284868	-3.62972	0.000283731	0.00294916	TRUE	DOWN	YHR203C		RPT4	129.122	0.955048	0.373705	2.55562	0.0105999	0.0480155	TRUE	UP	YOR259C_mRNA
COF1	191.067	-1.03911	0.275857	-3.76684	0.000165329	0.00188213	TRUE	DOWN	YLL050C		RCF1	41.694	0.948785	0.372112	2.54973	0.0107806	0.0486881	TRUE	UP	YML030W_mRNA
RPP1B	1942.16	-1.04735	0.233965	-4.47652	7.58699e-06	0.000128943	TRUE	DOWN	YDL130W		TAT1	51.8894	0.945812	0.367339	2.57477	0.0100307	0.0460615	TRUE	UP	YBR069C_mRNA
RPL26B	479.454	-1.04738	0.254431	-4.11655	3.84592e-05	0.000530441	TRUE	DOWN	YGR034W		SOD1	1138.85	0.933755	0.340343	2.74357	0.00607743	0.0309236	TRUE	UP	YJR104C_mRNA
RPS26B	218.373	-1.04876	0.301481	-3.4787	0.000503854	0.00474231	TRUE	DOWN	YER131W		AI2	120.854	0.927471	0.30568	3.03412	0.00241237	0.0149019	TRUE	UP	Q0055_mRNA
NA.82	41.628	-1.07044	0.393295	-2.72172	0.00649438	0.0384322	TRUE	DOWN	snR11		HOR7	651.788	0.927013	0.283707	3.2675	0.00108501	0.00773387	TRUE	UP	YMR251W-A_mRNA
RPL37B	292.567	-1.07111	0.274735	-3.89869	9.67128e-05	0.00120735	TRUE	DOWN	YDR500C		PDC1	121.734	0.899298	0.309889	2.902	0.00370785	0.0211886	TRUE	UP	YLR044C_mRNA
RPL13A	144.598	-1.0716	0.29547	-3.62677	0.000286988	0.00297439	TRUE	DOWN	YDL082W		YEF3	280.789	0.841354	0.284765	2.95455	0.00313122	0.0185269	TRUE	UP	YLR249W_mRNA
SSB2	167.446	-1.07975	0.291667	-3.70198	0.000213922	0.00232462	TRUE	DOWN	YNL209W		PGK1	1420.34	0.831639	0.32168	2.5853	0.0097294	0.0451115	TRUE	UP	YCR012W_mRNA
ADE8	75.758	-1.07975	0.308125	-3.50425	0.000457887	0.00436697	TRUE	DOWN	YDR408C		RPS8B	454.067	-0.756493	0.270455	-2.79711	0.00515622	0.0272898	TRUE	DOWN	YER102W_mRNA
RPL1B	307.205	-1.08253	0.261314	-4.14263	3.4335e-05	0.000488447	TRUE	DOWN	YGL135W		TIF11	126.075	-0.759533	0.295473	-2.57057	0.0101533	0.0463061	TRUE	DOWN	YMR260C_mRNA
RTN1	40.7825	-1.09545	0.388383	-2.82055	0.00479414	0.0300031	TRUE	DOWN	YDR233C		RPP1A	1694.84	-0.763402	0.296165	-2.57762	0.00994836	0.0458722	TRUE	DOWN	YDL081C_mRNA
VMA10	140.336	-1.0965	0.317472	-3.45384	0.00055266	0.00510783	TRUE	DOWN	YHR039C-A		RPS1A	457.521	-0.769843	0.26821	-2.8703	0.00410085	0.0228867	TRUE	DOWN	YLR441C_mRNA
RPS9B	245.567	-1.09672	0.265249	-4.13466	3.55479e-05	0.000496011	TRUE	DOWN	YBR189W		RPS4A	315.211	-0.777093	0.30161	-2.57649	0.009981	0.045938	TRUE	DOWN	YJR145C_mRNA
RPP1A	2035.67	-1.09986	0.23726	-4.63566	3.55793e-06	6.47652e-05	TRUE	DOWN	YDL081C		NA.46	709.46	-0.780093	0.262595	-2.9707	0.0029712	0.0178006	TRUE	DOWN	YCR024C-B_mRNA
RPL43B	424.187	-1.10244	0.267299	-4.12437	3.71752e-05	0.000514712	TRUE	DOWN	YJR094W-A		ASC1	472.395	-0.825156	0.272043	-3.03318	0.00241989	0.0149019	TRUE	DOWN	YMR116C_mRNA
FET3	169.946	-1.10576	0.41853	-2.64202	0.00824127	0.0461769	TRUE	DOWN	YMR058W		TIF1	88.7121	-0.841064	0.326019	-2.5798	0.0098857	0.0456463	TRUE	DOWN	YKR059W_mRNA
SMX3	60.047	-1.1101	0.339516	-3.26965	0.0010768	0.00879589	TRUE	DOWN	YPR182W		RPP1B	1711.15	-0.845456	0.324108	-2.60857	0.00909222	0.0425109	TRUE	DOWN	YDL130W_mRNA
RPO26	53.3988	-1.11063	0.349686	-3.17607	0.00149285	0.0114879	TRUE	DOWN	YPR187W		AI5_ALPHA	149.172	-0.847174	0.293286	-2.88856	0.00387007	0.0218541	TRUE	DOWN	Q0070_mRNA
PHO88	127.461	-1.11242	0.280015	-3.97273	7.10536e-05	0.000906755	TRUE	DOWN	YBR106W		HHT1	202.237	-0.851172	0.315983	-2.69373	0.00706573	0.0350088	TRUE	DOWN	YBR010W_mRNA
HMO1	48.4264	-1.12614	0.351416	-3.20457	0.00135267	0.0106141	TRUE	DOWN	YDR174W		HHF1	102.676	-0.861294	0.318039	-2.70814	0.0067661	0.0337846	TRUE	DOWN	YBR009C_mRNA
TMA7	49.6189	-1.13284	0.353956	-3.20052	0.00137178	0.0107125	TRUE	DOWN	YLR262C-A		TOS1	132.465	-0.874944	0.320766	-2.72767	0.00637833	0.0322584	TRUE	DOWN	YBR162C_mRNA
RPL23B	647.91	-1.1337	0.245019	-4.62696	3.71065e-06	6.72041e-05	TRUE	DOWN	YER117W		RPL24A	285.606	-0.881368	0.298428	-2.95337	0.00314322	0.0185323	TRUE	DOWN	YGL031C_mRNA
ZUO1	54.2144	-1.13437	0.346909	-3.26992	0.00107577	0.00879589	TRUE	DOWN	YGR285C		TMA19	484.4	-0.894504	0.278015	-3.21746	0.00129331	0.00893289	TRUE	DOWN	YKL056C_mRNA
CDC33	67.667	-1.13529	0.330135	-3.43886	0.000584178	0.00537696	TRUE	DOWN	YOL139C		SUI3	79.8061	-0.899974	0.325808	-2.76228	0.00573989	0.0297035	TRUE	DOWN	YPL237W_mRNA
RPS18A	468.531	-1.14404	0.267359	-4.27906	1.87684e-05	0.000287501	TRUE	DOWN	YDR450W		RPS17A	671.761	-0.904261	0.286121	-3.16041	0.00157546	0.0105758	TRUE	DOWN	YML024W_mRNA
RPS31	1778.04	-1.1479	0.26574	-4.31963	1.56289e-05	0.000245812	TRUE	DOWN	YLR167W		PFY1	115.249	-0.905025	0.315383	-2.86961	0.0041098	0.0228984	TRUE	DOWN	YOR122C_mRNA
CMD1	47.0093	-1.15127	0.357689	-3.21862	0.00128808	0.0101966	TRUE	DOWN	YBR109C		RPS17B	517.317	-0.907854	0.278225	-3.26302	0.00110231	0.00782386	TRUE	DOWN	YDR447C_mRNA
RPS21B	568.504	-1.15944	0.262218	-4.42165	9.79498e-06	0.000164135	TRUE	DOWN	YJL136C		RPS28B	86.527	-0.908836	0.337785	-2.69057	0.00713292	0.0352221	TRUE	DOWN	YLR264W_mRNA
HPT1	43.3699	-1.16315	0.356413	-3.26348	0.00110053	0.0089693	TRUE	DOWN	YDR399W		RPL4B	561.059	-0.911458	0.285113	-3.19683	0.00138945	0.00949885	TRUE	DOWN	YDR012W_mRNA
YIH1	52.0095	-1.16729	0.364774	-3.20002	0.00137416	0.0107125	TRUE	DOWN	YCR059C		RPS1B	465.596	-0.914056	0.285052	-3.20663	0.00134301	0.00921909	TRUE	DOWN	YML063W_mRNA
RPL4B	655.521	-1.17444	0.24783	-4.7389	2.14885e-06	4.12074e-05	TRUE	DOWN	YDR012W		VMA3	272.342	-0.920983	0.306012	-3.00963	0.00261566	0.0158696	TRUE	DOWN	YEL027W_mRNA
RPL14A	237.827	-1.17617	0.280966	-4.18617	2.83697e-05	0.000413551	TRUE	DOWN	YKL006W		CTS1	68.2906	-0.922178	0.340551	-2.7079	0.00677106	0.0337846	TRUE	DOWN	YLR286C_mRNA
RPL16B	373.457	-1.18937	0.286109	-4.15705	3.22383e-05	0.000464283	TRUE	DOWN	YNL069C		RPS0B	295.138	-0.933852	0.290449	-3.2152	0.00130355	0.0089851	TRUE	DOWN	YLR048W_mRNA
RPS18B	393.363	-1.19953	0.25938	-4.6246	3.75317e-06	6.76325e-05	TRUE	DOWN	YML026C		NA.48	22210.4	-0.938401	0.323925	-2.89696	0.00376792	0.0213857	TRUE	DOWN	YLR154W-B_mRNA
RPL5	208.581	-1.20023	0.279756	-4.29028	1.78448e-05	0.000275826	TRUE	DOWN	YPL131W		SML1	75.676	-0.938576	0.325097	-2.88706	0.00388856	0.0219215	TRUE	DOWN	YML058W_mRNA
RET3	25.1943	-1.21462	0.449833	-2.70015	0.00693081	0.0404786	TRUE	DOWN	YPL010W		RPS16A	306.385	-0.949322	0.320258	-2.96424	0.00303427	0.0180491	TRUE	DOWN	YMR143W_mRNA
RPL9B	90.9154	-1.21494	0.312358	-3.88958	0.000100417	0.00123745	TRUE	DOWN	YNL067W		HHF2	273.601	-0.954778	0.310745	-3.07254	0.00212245	0.0135926	TRUE	DOWN	YNL030W_mRNA
IPP1	45.3965	-1.21672	0.373964	-3.25357	0.00113963	0.00922511	TRUE	DOWN	YBR011C		RPS8A	533.825	-0.966999	0.284003	-3.40489	0.000661906	0.00520647	TRUE	DOWN	YBL072C_mRNA
RPS21A	260.866	-1.22517	0.261265	-4.68939	2.74015e-06	5.19904e-05	TRUE	DOWN	YKR057W		RPL14B	209.117	-0.973843	0.28905	-3.36912	0.000754091	0.00584901	TRUE	DOWN	YHL001W_mRNA
RPL21B	60.1818	-1.22613	0.356662	-3.43779	0.000586489	0.00537889	TRUE	DOWN	YPL079W		ADK1	136.858	-0.976209	0.304866	-3.20209	0.00136435	0.00934634	TRUE	DOWN	YDR226W_mRNA
RPL11A	267.583	-1.22686	0.290888	-4.21765	2.4686e-05	0.000365802	TRUE	DOWN	YPR102C		TIM10	97.4484	-0.981417	0.367505	-2.67049	0.0075741	0.0369638	TRUE	DOWN	YHR005C-A_mRNA
RPC40	23.6328	-1.23351	0.441311	-2.79511	0.0051882	0.0321328	TRUE	DOWN	YPR110C		MMF1	294.084	-0.984377	0.331957	-2.96537	0.00302315	0.0180149	TRUE	DOWN	YIL051C_mRNA
YPQ1	20.6092	-1.23664	0.464149	-2.66431	0.00771461	0.0438425	TRUE	DOWN	YOL092W		SPC25	33.2807	-0.993275	0.386582	-2.56937	0.0101883	0.0464025	TRUE	DOWN	YER018C_mRNA
APT1	58.3125	-1.2371	0.334279	-3.70082	0.000214905	0.00232824	TRUE	DOWN	YML022W		GPM1	298.496	-0.994931	0.32668	-3.04558	0.0023223	0.0144997	TRUE	DOWN	YKL152C_mRNA
RPS22B	34.3646	-1.25219	0.409228	-3.05988	0.00221428	0.0161719	TRUE	DOWN	YLR367W		RPL7A	439.766	-0.996377	0.286475	-3.47805	0.000505069	0.00420012	TRUE	DOWN	YGL076C_mRNA
RPS19B	92.6369	-1.25575	0.306433	-4.09796	4.1681e-05	0.00056832	TRUE	DOWN	YNL302C		ESF1	35.97	-0.998482	0.38513	-2.59258	0.00952581	0.0442904	TRUE	DOWN	YDR365C_mRNA
RPL6A	486.915	-1.26358	0.261673	-4.82884	1.37332e-06	2.81414e-05	TRUE	DOWN	YML073C		POR1	62.8656	-1.00065	0.384245	-2.6042	0.00920897	0.0429966	TRUE	DOWN	YNL055C_mRNA
NA.73	22.9827	-1.27327	0.445899	-2.85551	0.00429671	0.0277122	TRUE	DOWN	snR33		NA.59	36.3519	-1.00418	0.380573	-2.63859	0.00832508	0.0399242	TRUE	DOWN	YDR341C_mRNA
RPL41B	2422.26	-1.27906	0.24785	-5.16061	2.46151e-07	6.58729e-06	TRUE	DOWN	YDL133C-A		GCN4	109.653	-1.0078	0.310371	-3.24706	0.00116602	0.00817191	TRUE	DOWN	YEL009C_mRNA
NOP10	36.2915	-1.29274	0.413671	-3.12504	0.00177782	0.0134216	TRUE	DOWN	YHR072W-A		ARF1	169.115	-1.01036	0.289435	-3.49078	0.000481606	0.00405544	TRUE	DOWN	YDL192W_mRNA
RPS25B	402.784	-1.29495	0.259485	-4.99048	6.02279e-07	1.44951e-05	TRUE	DOWN	YLR333C		RIM1	42.2661	-1.01302	0.3733	-2.71368	0.00665414	0.0335517	TRUE	DOWN	YCR028C-A_mRNA
ARO2	166.353	-1.29506	0.272537	-4.75189	2.01529e-06	3.92762e-05	TRUE	DOWN	YGL148W		SSS1	95.3612	-1.01876	0.348033	-2.92719	0.00342042	0.019886	TRUE	DOWN	YDR086C_mRNA
RPL4A	1036.46	-1.30655	0.237623	-5.49841	3.83237e-08	1.2381e-06	TRUE	DOWN	YBR031W		GIS2	61.8718	-1.0201	0.351893	-2.8989	0.00374473	0.0213265	TRUE	DOWN	YNL255C_mRNA
RPS7B	308.82	-1.31292	0.267785	-4.90288	9.44415e-07	2.05084e-05	TRUE	DOWN	YNL096C		ACB1	109.023	-1.02992	0.319943	-3.21909	0.00128598	0.00890066	TRUE	DOWN	YGR037C_mRNA
RPS26A	429.178	-1.31668	0.282784	-4.65614	3.22194e-06	5.92507e-05	TRUE	DOWN	YGL189C		SEC53	91.5697	-1.03109	0.335135	-3.07664	0.00209348	0.0135106	TRUE	DOWN	YFL045C_mRNA
FOL2	23.5303	-1.32216	0.465809	-2.83841	0.00453391	0.028811	TRUE	DOWN	YGR267C		SER1	29.797	-1.03461	0.407898	-2.53645	0.0111981	0.0497513	TRUE	DOWN	YOR184W_mRNA
RPL16A	172.58	-1.32467	0.284162	-4.66167	3.13661e-06	5.79789e-05	TRUE	DOWN	YIL133C		RPS3	795.132	-1.03702	0.285003	-3.63862	0.000274098	0.00256767	TRUE	DOWN	YNL178W_mRNA
SUI2	34.4544	-1.33155	0.396889	-3.35498	0.000793717	0.00676619	TRUE	DOWN	YJR007W		TMA22	52.3773	-1.0381	0.358295	-2.89733	0.00376356	0.0213857	TRUE	DOWN	YJR014W_mRNA
FCF2	19.6103	-1.33595	0.497273	-2.68654	0.00721961	0.0418247	TRUE	DOWN	YLR051C		RPL19B	481.311	-1.0389	0.293456	-3.54023	0.000399773	0.00345334	TRUE	DOWN	YBL027W_mRNA
SBH1	19.5245	-1.3363	0.484293	-2.75929	0.00579274	0.03503	TRUE	DOWN	YER087C-B		ARO2	143.014	-1.04014	0.299782	-3.46965	0.000521134	0.00429101	TRUE	DOWN	YGL148W_mRNA
RPS30A	298.961	-1.33916	0.279087	-4.79835	1.59977e-06	3.20491e-05	TRUE	DOWN	YLR287C-A		RPS6A	393.538	-1.04886	0.291732	-3.59527	0.000324059	0.00293585	TRUE	DOWN	YPL090C_mRNA
RPL27B	173.237	-1.34077	0.301117	-4.45266	8.48113e-06	0.000143459	TRUE	DOWN	YDR471W		YHB1	36.0285	-1.04994	0.384236	-2.73255	0.0062846	0.0318325	TRUE	DOWN	YGR234W_mRNA
RPC10	33.0038	-1.34902	0.39901	-3.38091	0.000722454	0.00633428	TRUE	DOWN	YHR143W-A		RPL30	453.439	-1.05163	0.27854	-3.7755	0.000159684	0.0016476	TRUE	DOWN	YGL030W_mRNA
EBP2	42.4036	-1.35261	0.362883	-3.72739	0.000193472	0.00213474	TRUE	DOWN	YKL172W		ERV14	53.8088	-1.05618	0.40301	-2.62073	0.00877412	0.0414878	TRUE	DOWN	YGL054C_mRNA
RPS24A	719.618	-1.35494	0.254817	-5.31732	1.05308e-07	3.14697e-06	TRUE	DOWN	YER074W		HTB1	89.1687	-1.05699	0.384096	-2.75188	0.00592538	0.030328	TRUE	DOWN	YDR224C_mRNA
SNQ2	24.4365	-1.35783	0.449395	-3.02146	0.00251563	0.0178989	TRUE	DOWN	YDR011W		RER1	32.0202	-1.05782	0.416975	-2.5369	0.011184	0.0497513	TRUE	DOWN	YCL001W_mRNA
RPL34A	324.616	-1.35867	0.29049	-4.67717	2.90855e-06	5.46077e-05	TRUE	DOWN	YER056C-A		TAE1	51.2808	-1.07596	0.350378	-3.07084	0.00213459	0.0136443	TRUE	DOWN	YBR261C_mRNA
RPL18A	501.056	-1.36426	0.252958	-5.39323	6.92039e-08	2.17689e-06	TRUE	DOWN	YOL120C		GUK1	59.9913	-1.08118	0.371805	-2.90792	0.00363838	0.0208273	TRUE	DOWN	YDR454C_mRNA
TOM7	46.6094	-1.37067	0.408323	-3.35683	0.000788409	0.00674758	TRUE	DOWN	YNL070W		RPL37B	287.914	-1.08308	0.293391	-3.69159	0.000222853	0.00216569	TRUE	DOWN	YDR500C_mRNA
BNA1	18.2075	-1.37616	0.499516	-2.755	0.0058693	0.0353736	TRUE	DOWN	YJR025C		CAF20	51.8656	-1.08434	0.368171	-2.94522	0.0032273	0.0188616	TRUE	DOWN	YOR276W_mRNA
NA.90	47.6136	-1.3815	0.529043	-2.61131	0.00901952	0.0493616	TRUE	DOWN	snR191		RPL38	944.788	-1.0902	0.29969	-3.63776	0.000275014	0.00256808	TRUE	DOWN	YLR325C_mRNA
RPL27A	652.713	-1.38497	0.265557	-5.21534	1.83476e-07	5.02249e-06	TRUE	DOWN	YHR010W		RPS4B	178.715	-1.09581	0.3147	-3.48207	0.000497548	0.00415826	TRUE	DOWN	YHR203C_mRNA
RPL35A	426.056	-1.39019	0.266893	-5.20879	1.90081e-07	5.16387e-06	TRUE	DOWN	YDL191W		RPL32	559.922	-1.09594	0.299154	-3.66346	0.000248835	0.00237673	TRUE	DOWN	YBL092W_mRNA
HTB2	63.534	-1.39587	0.371528	-3.75711	0.000171888	0.00194445	TRUE	DOWN	YBL002W		RPL42B	201.966	-1.10485	0.302097	-3.65728	0.000254911	0.00241407	TRUE	DOWN	YHR141C_mRNA
MET16	32.2477	-1.40265	0.395551	-3.54607	0.000391017	0.00388418	TRUE	DOWN	YPR167C		RPL9A	336.21	-1.10848	0.298996	-3.70733	0.000209453	0.00205338	TRUE	DOWN	YGL147C_mRNA
RPS25A	197.971	-1.40379	0.284802	-4.92899	8.2654e-07	1.82961e-05	TRUE	DOWN	YGR027C		NA.44	81.0033	-1.11304	0.368555	-3.02002	0.00252755	0.0154004	TRUE	DOWN	YMR122W-A_mRNA
ASN1	50.4284	-1.4098	0.351092	-4.01546	5.93296e-05	0.000768072	TRUE	DOWN	YPR145W		RPL21B	62.1473	-1.11647	0.364203	-3.06553	0.00217288	0.013836	TRUE	DOWN	YPL079W_mRNA
TRX1	182.273	-1.42509	0.277228	-5.14052	2.73981e-07	7.22423e-06	TRUE	DOWN	YLR043C		SSB2	166.523	-1.117	0.317254	-3.52085	0.000430168	0.00369679	TRUE	DOWN	YNL209W_mRNA
BRX1	28.1646	-1.42635	0.446568	-3.19404	0.00140298	0.0109134	TRUE	DOWN	YOL077C		RPL43B	417.095	-1.12627	0.295769	-3.80794	0.000140129	0.0014685	TRUE	DOWN	YJR094W-A_mRNA
RPL26A	217.285	-1.42763	0.27964	-5.10524	3.30374e-07	8.46229e-06	TRUE	DOWN	YLR344W		RTN1	40.5771	-1.12729	0.396365	-2.84407	0.00445407	0.0244098	TRUE	DOWN	YDR233C_mRNA
RPL17B	153.039	-1.43272	0.310124	-4.61984	3.84036e-06	6.84152e-05	TRUE	DOWN	YJL177W		NA.54	33.363	-1.12786	0.404107	-2.79098	0.00525482	0.0276643	TRUE	DOWN	YDL157C_mRNA
DBP9	21.1901	-1.43761	0.458027	-3.13871	0.00169693	0.0129197	TRUE	DOWN	YLR276C		RPL1A	240.607	-1.12966	0.309629	-3.64844	0.000263838	0.00249155	TRUE	DOWN	YPL220W_mRNA
RPL33B	336.045	-1.43768	0.270371	-5.31744	1.0524e-07	3.14697e-06	TRUE	DOWN	YOR234C		MET16	27.6394	-1.1318	0.445108	-2.54276	0.0109982	0.049342	TRUE	DOWN	YPR167C_mRNA
RPS16B	325.769	-1.44109	0.257516	-5.59613	2.19192e-08	7.7061e-07	TRUE	DOWN	YDL083C		RPL26B	483.582	-1.13186	0.289984	-3.90319	9.49315e-05	0.00105085	TRUE	DOWN	YGR034W_mRNA
RPL40A	601.518	-1.44975	0.262518	-5.52249	3.34226e-08	1.09957e-06	TRUE	DOWN	YIL148W		MIM2	42.9404	-1.13409	0.373905	-3.03311	0.00242049	0.0149019	TRUE	DOWN	YLR099W-A_mRNA
CBF5	30.3864	-1.45283	0.434516	-3.34356	0.000827107	0.00701183	TRUE	DOWN	YLR175W		RPL1B	302.029	-1.14353	0.292952	-3.90348	9.48204e-05	0.00105085	TRUE	DOWN	YGL135W_mRNA
CCW14	15.5402	-1.45364	0.552237	-2.63228	0.00848133	0.0470078	TRUE	DOWN	YLR390W-A		SAM1	119.75	-1.14648	0.335686	-3.41534	0.000637034	0.00508259	TRUE	DOWN	YLR180W_mRNA
SRP14	30.2015	-1.46299	0.416816	-3.50993	0.000448226	0.00431242	TRUE	DOWN	YDL092W		ESS1	44.6608	-1.14722	0.423361	-2.7098	0.00673241	0.0337262	TRUE	DOWN	YJR017C_mRNA
NOP1	71.2879	-1.47008	0.335689	-4.37927	1.19076e-05	0.000192345	TRUE	DOWN	YDL014W		RPS22B	51.0312	-1.14863	0.364211	-3.15374	0.00161194	0.0107559	TRUE	DOWN	YLR367W_mRNA
URA4	20.7666	-1.47814	0.484427	-3.05131	0.00227846	0.0165062	TRUE	DOWN	YLR420W		HPT1	43.3943	-1.15302	0.362069	-3.18454	0.00144983	0.00987121	TRUE	DOWN	YDR399W_mRNA
RPL20A	180.993	-1.47858	0.282064	-5.242	1.58843e-07	4.45009e-06	TRUE	DOWN	YMR242C		RPL31B	166.885	-1.15581	0.30392	-3.803	0.000142957	0.00149345	TRUE	DOWN	YLR406C_mRNA
RPB9	13.2471	-1.48476	0.567889	-2.61453	0.00893503	0.0489924	TRUE	DOWN	YGL070C		PHO88	126.419	-1.16382	0.304334	-3.82414	0.000131228	0.00139712	TRUE	DOWN	YBR106W_mRNA
POP8	18.6479	-1.48664	0.532596	-2.7913	0.00524967	0.0324016	TRUE	DOWN	YBL018C		RPL42A	350.877	-1.16438	0.331402	-3.51351	0.000442231	0.00377137	TRUE	DOWN	YNL162W_mRNA
ATP18	39.8315	-1.49541	0.373209	-4.0069	6.15214e-05	0.000793582	TRUE	DOWN	YML081C-A		COF1	197.213	-1.16527	0.309709	-3.76245	0.000168259	0.00172543	TRUE	DOWN	YLL050C_mRNA
DRE2	26.3919	-1.50445	0.433599	-3.46968	0.000521086	0.00486618	TRUE	DOWN	YKR071C		RPL13A	147.973	-1.17205	0.327469	-3.57912	0.000344747	0.00308152	TRUE	DOWN	YDL082W_mRNA
TIP1	33.2753	-1.50657	0.490726	-3.07009	0.00213992	0.0156607	TRUE	DOWN	YBR067C		RPO26	61.5828	-1.17262	0.351447	-3.33656	0.00084821	0.00636821	TRUE	DOWN	YPR187W_mRNA
LYS21	16.9241	-1.50853	0.513941	-2.93521	0.00333318	0.022595	TRUE	DOWN	YDL131W		RPS9B	247.587	-1.17975	0.2964	-3.98027	6.88376e-05	0.000816043	TRUE	DOWN	YBR189W_mRNA
RPA34	17.4961	-1.51004	0.524319	-2.88	0.00397672	0.0259754	TRUE	DOWN	YJL148W		VMA10	148	-1.18545	0.347197	-3.41435	0.000639341	0.00508885	TRUE	DOWN	YHR039C-A_mRNA
NAR1	13.9623	-1.51606	0.553148	-2.74078	0.00612936	0.0367557	TRUE	DOWN	YNL240C		LIA1	116.817	-1.19119	0.446955	-2.66513	0.00769582	0.0375012	TRUE	DOWN	YJR070C_mRNA
LEU4	18.0049	-1.52264	0.51375	-2.96377	0.00303892	0.02097	TRUE	DOWN	YNL104C		RPS26B	225.445	-1.19235	0.349015	-3.41632	0.000634742	0.00507642	TRUE	DOWN	YER131W_mRNA
SPO24	194.346	-1.52584	0.319981	-4.76854	1.8557e-06	3.66908e-05	TRUE	DOWN	YPR036W-A		NOP1	58.4847	-1.19675	0.398305	-3.0046	0.00265927	0.0160758	TRUE	DOWN	YDL014W_mRNA
NA.84	14.7166	-1.54166	0.568852	-2.71012	0.00672594	0.0395397	TRUE	DOWN	YIL002W-A		RPL23B	654.074	-1.20262	0.281218	-4.27646	1.89886e-05	0.000261229	TRUE	DOWN	YER117W_mRNA
NHP2	104.439	-1.54213	0.30151	-5.1147	3.14244e-07	8.1658e-06	TRUE	DOWN	YDL208W		HMO1	48.5208	-1.20581	0.365076	-3.30291	0.000956854	0.00702484	TRUE	DOWN	YDR174W_mRNA
RPL31A	471.602	-1.54513	0.279299	-5.53216	3.16307e-08	1.06007e-06	TRUE	DOWN	YDL075W		HTS1	23.9909	-1.20865	0.458528	-2.63594	0.00839042	0.0400131	TRUE	DOWN	YPR033C_mRNA
RRB1	13.7358	-1.54721	0.559836	-2.76368	0.00571539	0.0346792	TRUE	DOWN	YMR131C		CDC33	68.5408	-1.21242	0.353225	-3.43244	0.000598178	0.00483022	TRUE	DOWN	YOL139C_mRNA
RPL13B	471.933	-1.55449	0.293073	-5.30412	1.13217e-07	3.32784e-06	TRUE	DOWN	YMR142C		RPL14A	237.434	-1.21608	0.310935	-3.91105	9.18975e-05	0.00102747	TRUE	DOWN	YKL006W_mRNA
BUD20	16.2471	-1.55911	0.537203	-2.90227	0.00370466	0.0245562	TRUE	DOWN	YLR074C		RPS18A	473.395	-1.21826	0.303255	-4.01726	5.88782e-05	0.000708021	TRUE	DOWN	YDR450W_mRNA
OST3	22.711	-1.56718	0.461412	-3.39648	0.000682589	0.00610737	TRUE	DOWN	YOR085W		YPQ1	20.8652	-1.22366	0.456012	-2.68339	0.00728807	0.0357244	TRUE	DOWN	YOL092W_mRNA
NA.10	167.764	-1.5698	0.277876	-5.6493	1.61104e-08	5.89509e-07	TRUE	DOWN	YDR524W-C		APT1	61.7237	-1.22722	0.345727	-3.54968	0.000385698	0.00336368	TRUE	DOWN	YML022W_mRNA
ASP1	23.3073	-1.57129	0.47595	-3.30137	0.000962126	0.0079681	TRUE	DOWN	YDR321W		NA.52	35.0666	-1.2355	0.437394	-2.82468	0.00473273	0.0256426	TRUE	DOWN	YPL238C_mRNA
HXT1	35.5684	-1.57492	0.407545	-3.8644	0.000111363	0.00135612	TRUE	DOWN	YHR094C		CMD1	47.5438	-1.23733	0.369787	-3.34605	0.000819725	0.00625649	TRUE	DOWN	YBR109C_mRNA
RPL35B	110.876	-1.57567	0.318968	-4.9399	7.81613e-07	1.77396e-05	TRUE	DOWN	YDL136W		RET3	25.4846	-1.24816	0.449994	-2.77373	0.00554178	0.0288311	TRUE	DOWN	YPL010W_mRNA
MPC2	71.1319	-1.57795	0.31482	-5.01224	5.38014e-07	1.30359e-05	TRUE	DOWN	YHR162W		IPP1	46.3608	-1.25231	0.388543	-3.22311	0.00126809	0.00881334	TRUE	DOWN	YBR011C_mRNA
NA.33	45.0971	-1.57818	0.419861	-3.75881	0.000170722	0.00193737	TRUE	DOWN	snR190		PHO4	20.1757	-1.25438	0.46569	-2.69359	0.00706878	0.0350088	TRUE	DOWN	YFR034C_mRNA
RIB5	25.4306	-1.57838	0.441721	-3.57326	0.000352571	0.00354151	TRUE	DOWN	YBR256C		TMA7	49.4191	-1.25581	0.373218	-3.36482	0.000765926	0.0059197	TRUE	DOWN	YLR262C-A_mRNA
NA.58	25.2076	-1.57963	0.492567	-3.20694	0.00134155	0.01055	TRUE	DOWN	snR82		DBP2	26.7219	-1.26174	0.435714	-2.89579	0.00378203	0.0214199	TRUE	DOWN	YNL112W_mRNA
ARO8	12.1299	-1.5853	0.599667	-2.64362	0.00820238	0.0460978	TRUE	DOWN	YGL202W		RPL43A	22.1565	-1.2677	0.45907	-2.76145	0.00575449	0.029733	TRUE	DOWN	YPR043W_mRNA
NOP15	38.2345	-1.58915	0.374659	-4.24159	2.21942e-05	0.000333006	TRUE	DOWN	YNL110C		DAT1	21.6066	-1.27234	0.487512	-2.60987	0.0090577	0.0424088	TRUE	DOWN	YML113W_mRNA
NIP7	19.1734	-1.59183	0.557839	-2.85357	0.00432307	0.0277943	TRUE	DOWN	YPL211W		RPL11A	268.499	-1.27817	0.325962	-3.92121	8.81052e-05	0.000991703	TRUE	DOWN	YPR102C_mRNA
DBP2	33.3283	-1.59344	0.417899	-3.81298	0.000137299	0.00161959	TRUE	DOWN	YNL112W		RPS31	1851.27	-1.27888	0.314506	-4.06633	4.77596e-05	0.000591335	TRUE	DOWN	YLR167W_mRNA
GCV1	14.1614	-1.59539	0.562147	-2.83802	0.00453938	0.028811	TRUE	DOWN	YDR019C		RPS21B	581.592	-1.28412	0.302031	-4.25163	2.12222e-05	0.000288398	TRUE	DOWN	YJL136C_mRNA
NA.44	21.6917	-1.59781	0.466823	-3.42274	0.000619928	0.00564229	TRUE	DOWN	snR49		RPL5	217.302	-1.28872	0.308306	-4.18002	2.91488e-05	0.000379161	TRUE	DOWN	YPL131W_mRNA
RPS20	447.195	-1.60027	0.289535	-5.52704	3.25677e-08	1.08137e-06	TRUE	DOWN	YHL015W		RPS21A	261.497	-1.30086	0.296209	-4.3917	1.12467e-05	0.000167101	TRUE	DOWN	YKR057W_mRNA
RPS13	523.341	-1.60607	0.264174	-6.0796	1.20486e-09	5.68505e-08	TRUE	DOWN	YDR064W		RPL16B	375.784	-1.30449	0.324553	-4.01935	5.83595e-05	0.000704317	TRUE	DOWN	YNL069C_mRNA
NA.85	14.4855	-1.6159	0.602842	-2.68047	0.00735192	0.0424541	TRUE	DOWN	snR5		FCF2	19.751	-1.31071	0.487282	-2.68985	0.00714844	0.0352467	TRUE	DOWN	YLR051C_mRNA
RPS7A	779.32	-1.63132	0.242895	-6.71618	1.86553e-11	1.2865e-09	TRUE	DOWN	YOR096W		RPC10	32.5689	-1.31277	0.400393	-3.2787	0.00104287	0.00752986	TRUE	DOWN	YHR143W-A_mRNA
RPB10	25.5483	-1.63166	0.47882	-3.40767	0.000655206	0.00590344	TRUE	DOWN	YOR210W		RPA49	15.3467	-1.3147	0.51033	-2.57617	0.00999011	0.045938	TRUE	DOWN	YNL248C_mRNA
GSP1	138.501	-1.63409	0.317547	-5.14599	2.66107e-07	7.06859e-06	TRUE	DOWN	YLR293C		GGC1	14.6256	-1.31476	0.517143	-2.54236	0.0110108	0.049342	TRUE	DOWN	YDL198C_mRNA
RPL6B	243.717	-1.64136	0.27785	-5.90735	3.47648e-09	1.48413e-07	TRUE	DOWN	YLR448W		NOP56	143.406	-1.31778	0.315058	-4.18265	2.88133e-05	0.000379027	TRUE	DOWN	YLR197W_mRNA
RPL17A	148.365	-1.64576	0.331641	-4.96247	6.9602e-07	1.63286e-05	TRUE	DOWN	YKL180W		RLP7	19.3765	-1.33002	0.494793	-2.68803	0.00718754	0.0352833	TRUE	DOWN	YNL002C_mRNA
RPA43	18.557	-1.65626	0.510897	-3.24186	0.00118753	0.00950556	TRUE	DOWN	YOR340C		RPS18B	398.086	-1.33022	0.307166	-4.33063	1.48685e-05	0.000211512	TRUE	DOWN	YML026C_mRNA
RIB4	18.5199	-1.65713	0.503507	-3.29117	0.000997711	0.00824376	TRUE	DOWN	YOL143C		SSB1	121.177	-1.33189	0.347499	-3.83279	0.000126696	0.00135751	TRUE	DOWN	YDL229W_mRNA
FSF1	41.9715	-1.65749	0.521514	-3.17823	0.00148175	0.0114516	TRUE	DOWN	YOR271C		HGH1	17.0618	-1.33512	0.505676	-2.64026	0.00828422	0.0398477	TRUE	DOWN	YGR187C_mRNA
HMF1	16.0156	-1.67491	0.580081	-2.88736	0.00388486	0.0255148	TRUE	DOWN	YER057C		EBP2	45.9619	-1.33626	0.362276	-3.68852	0.000225561	0.00217306	TRUE	DOWN	YKL172W_mRNA
NA.51	19.7379	-1.676	0.496506	-3.37558	0.000736597	0.00638029	TRUE	DOWN	YDL121C		RPL41B	1909.22	-1.34042	0.2767	-4.84431	1.27054e-06	2.53245e-05	TRUE	DOWN	YDL133C-A_mRNA
TRM82	10.4548	-1.68964	0.633764	-2.66604	0.0076751	0.0436872	TRUE	DOWN	YDR165W		SMT3	45.4801	-1.34268	0.390289	-3.44022	0.000581234	0.00471618	TRUE	DOWN	YDR510W_mRNA
SEC66	13.4557	-1.69949	0.578313	-2.9387	0.00329588	0.0224696	TRUE	DOWN	YBR171W		NOP10	36.1981	-1.34394	0.422637	-3.17988	0.00147335	0.0099822	TRUE	DOWN	YHR072W-A_mRNA
SAM4	56.5468	-1.70207	0.386472	-4.40413	1.06211e-05	0.000175518	TRUE	DOWN	YPL273W		ILV5	249.484	-1.34545	0.456809	-2.94531	0.00322627	0.0188616	TRUE	DOWN	YLR355C_mRNA
RPL20B	486.455	-1.70393	0.27109	-6.28547	3.26868e-10	1.77598e-08	TRUE	DOWN	YOR312C		CBF5	29.3542	-1.35224	0.437159	-3.09323	0.0019799	0.012852	TRUE	DOWN	YLR175W_mRNA
APQ12	9.71908	-1.70677	0.654723	-2.60686	0.00913774	0.0498751	TRUE	DOWN	YIL040W		RPL9B	93.18	-1.35398	0.341454	-3.96534	7.32915e-05	0.00085795	TRUE	DOWN	YNL067W_mRNA
ACO2	22.0968	-1.70886	0.485525	-3.5196	0.000432192	0.00418521	TRUE	DOWN	YJL200C		NOC2	14.7015	-1.35909	0.519923	-2.61403	0.00894812	0.0420134	TRUE	DOWN	YOR206W_mRNA
HIS4	37.6081	-1.71772	0.411626	-4.17302	3.00594e-05	0.000434649	TRUE	DOWN	YCL030C		RPC40	34.5036	-1.3591	0.398943	-3.40676	0.00065738	0.00518307	TRUE	DOWN	YPR110C_mRNA
HIS1	60.5518	-1.71903	0.355183	-4.83984	1.29946e-06	2.67808e-05	TRUE	DOWN	YER055C		NA.26	46.0332	-1.36106	0.376512	-3.61493	0.000300426	0.00275913	TRUE	DOWN	YCR087W_mRNA
SNG1	10.707	-1.73535	0.646303	-2.68503	0.00725229	0.0419463	TRUE	DOWN	YGR197C		RRP15	55.4508	-1.36389	0.345376	-3.94901	7.84742e-05	0.000901509	TRUE	DOWN	YPR143W_mRNA
ILV1	15.2359	-1.74589	0.532325	-3.27975	0.001039	0.00852595	TRUE	DOWN	YER086W		SER2	22.3433	-1.36665	0.467759	-2.9217	0.00348123	0.0200998	TRUE	DOWN	YGR208W_mRNA
RPS19A	309.44	-1.75341	0.297743	-5.88902	3.88483e-09	1.63894e-07	TRUE	DOWN	YOL121C		TOM7	45.0486	-1.3693	0.41355	-3.31108	0.00092938	0.00687371	TRUE	DOWN	YNL070W_mRNA
NRK1	11.1918	-1.76199	0.64199	-2.74458	0.00605889	0.036455	TRUE	DOWN	YNL129W		MET28	23.122	-1.37058	0.482046	-2.84326	0.00446545	0.0244321	TRUE	DOWN	YIR017C_mRNA
NSR1	20.9252	-1.76751	0.499869	-3.53595	0.000406317	0.00400289	TRUE	DOWN	YGR159C		SUI2	33.7474	-1.3771	0.404098	-3.40785	0.000654774	0.00517473	TRUE	DOWN	YJR007W_mRNA
GLY1	32.4603	-1.79538	0.433142	-4.14501	3.39792e-05	0.000487398	TRUE	DOWN	YEL046C		RPS7B	310.72	-1.37812	0.299929	-4.59481	4.3314e-06	7.06336e-05	TRUE	DOWN	YNL096C_mRNA
MFA2	30.1472	-1.80036	0.474699	-3.79263	0.000149059	0.00173548	TRUE	DOWN	YNL145W		RPL22A	389.948	-1.38305	0.319157	-4.33346	1.46786e-05	0.000209704	TRUE	DOWN	YLR061W_mRNA
RPB8	45.0371	-1.8031	0.369965	-4.8737	1.0953e-06	2.32411e-05	TRUE	DOWN	YOR224C		SRP21	29.9356	-1.38789	0.424523	-3.2693	0.00107815	0.0077014	TRUE	DOWN	YKL122C_mRNA
THR4	14.2338	-1.81682	0.58223	-3.12044	0.00180579	0.0135756	TRUE	DOWN	YCR053W		RPS25B	410.453	-1.39068	0.298094	-4.66524	3.08254e-06	5.36716e-05	TRUE	DOWN	YLR333C_mRNA
KRR1	18.2227	-1.82474	0.535396	-3.4082	0.00065393	0.00590344	TRUE	DOWN	YCL059C		BCP1	17.6637	-1.39362	0.496946	-2.80437	0.00504156	0.0268343	TRUE	DOWN	YDR361C_mRNA
NA.83	9.52661	-1.82906	0.672161	-2.72116	0.00650539	0.0384322	TRUE	DOWN	snR56		RPL6A	501.77	-1.3948	0.302818	-4.60607	4.1035e-06	6.7911e-05	TRUE	DOWN	YML073C_mRNA
OST4	18.392	-1.83253	0.524356	-3.49481	0.000474396	0.00451243	TRUE	DOWN	YDL232W		RPS30A	293.818	-1.39964	0.310377	-4.50948	6.49864e-06	0.000100578	TRUE	DOWN	YLR287C-A_mRNA
NCE103	15.8473	-1.84292	0.556366	-3.31243	0.000924893	0.00771317	TRUE	DOWN	YNL036W		SNQ2	23.526	-1.40713	0.449962	-3.12722	0.00176466	0.0116127	TRUE	DOWN	YDR011W_mRNA
RPL37A	414.188	-1.84472	0.29043	-6.35169	2.12969e-10	1.23178e-08	TRUE	DOWN	YLR185W		ALG3	20.3767	-1.40794	0.493443	-2.85329	0.0043269	0.0238301	TRUE	DOWN	YBL082C_mRNA
NA.24	32.2843	-1.84572	0.420156	-4.39294	1.11828e-05	0.000182279	TRUE	DOWN	YGR079W		RPC19	16.9308	-1.41175	0.507133	-2.78378	0.00537294	0.028095	TRUE	DOWN	YNL113W_mRNA
ARO4	58.7627	-1.91068	0.337424	-5.66253	1.49154e-08	5.57153e-07	TRUE	DOWN	YBR249C		ISU2	47.4427	-1.41731	0.397726	-3.56354	0.000365883	0.00322125	TRUE	DOWN	YOR226C_mRNA
RPS22A	460.433	-1.91196	0.252317	-7.57761	3.51975e-14	3.50606e-12	TRUE	DOWN	YJL190C		BNA1	17.8461	-1.41907	0.494361	-2.87052	0.00409794	0.0228867	TRUE	DOWN	YJR025C_mRNA
RPS24B	141.413	-1.92231	0.301096	-6.38437	1.72101e-10	1.02859e-08	TRUE	DOWN	YIL069C		RPS26A	449.691	-1.42216	0.324448	-4.38331	1.16889e-05	0.000171386	TRUE	DOWN	YGL189C_mRNA
RPL36A	123.838	-1.92273	0.309301	-6.21636	5.08811e-10	2.60619e-08	TRUE	DOWN	YMR194W		RPL4A	1063.2	-1.42541	0.26968	-5.28558	1.2531e-07	3.80827e-06	TRUE	DOWN	YBR031W_mRNA
HMT1	22.3061	-1.92753	0.505297	-3.81464	0.00013638	0.00161405	TRUE	DOWN	YBR034C		NA.63	13.0208	-1.42683	0.561168	-2.54261	0.0110028	0.049342	TRUE	DOWN	YGR283C_mRNA
RPA12	17.193	-1.93467	0.564386	-3.42792	0.000608232	0.00554992	TRUE	DOWN	YJR063W		RPL16A	181.137	-1.42788	0.320932	-4.44917	8.62033e-06	0.000129897	TRUE	DOWN	YIL133C_mRNA
PCC1	11.7179	-1.9362	0.655365	-2.95439	0.00313291	0.0215636	TRUE	DOWN	YKR095W-A		RPS25A	198.101	-1.43723	0.313025	-4.59141	4.40252e-06	7.10726e-05	TRUE	DOWN	YGR027C_mRNA
RPL11B	183.468	-1.95764	0.288439	-6.78701	1.1448e-11	8.3781e-10	TRUE	DOWN	YGR085C		EFM3	18.6878	-1.43773	0.488091	-2.94562	0.00322307	0.0188616	TRUE	DOWN	YJR129C_mRNA
SNU13	53.3231	-1.95847	0.395125	-4.95657	7.17474e-07	1.66948e-05	TRUE	DOWN	YEL026W		RPS19B	449.243	-1.44844	0.282664	-5.12426	2.98709e-07	8.18513e-06	TRUE	DOWN	YNL302C_mRNA
NA.31	27.82	-1.96039	0.517174	-3.79057	0.000150299	0.00174425	TRUE	DOWN	snR14		POP8	21.0893	-1.45189	0.493495	-2.94206	0.00326033	0.0190214	TRUE	DOWN	YBL018C_mRNA
RPL34B	235.113	-1.96058	0.294508	-6.65716	2.79173e-11	1.85392e-09	TRUE	DOWN	YIL052C		RPS24A	730.557	-1.45693	0.294846	-4.94133	7.75929e-07	1.79689e-05	TRUE	DOWN	YER074W_mRNA
RPS10B	188.815	-1.97533	0.293307	-6.73467	1.64299e-11	1.17835e-09	TRUE	DOWN	YMR230W		RPS27A	240.718	-1.46157	0.295209	-4.95099	7.38367e-07	1.73828e-05	TRUE	DOWN	YKL156W_mRNA
FIT2	17.2582	-1.97882	0.546433	-3.62135	0.000293069	0.00301996	TRUE	DOWN	YOR382W		YMC1	42.4141	-1.47491	0.431538	-3.4178	0.000631293	0.00506094	TRUE	DOWN	YPR058W_mRNA
RPL25	338.953	-1.98911	0.339386	-5.86091	4.6035e-09	1.89749e-07	TRUE	DOWN	YOL127W		SBH1	22.1459	-1.47599	0.484237	-3.04808	0.00230309	0.0144995	TRUE	DOWN	YER087C-B_mRNA
SIT1	8.61943	-1.99391	0.732552	-2.72187	0.00649131	0.0384322	TRUE	DOWN	YEL065W		RPL27B	178.335	-1.47649	0.341614	-4.32209	1.5456e-05	0.000218014	TRUE	DOWN	YDR471W_mRNA
RPL22B	49.0071	-2.0002	0.360423	-5.54958	2.86355e-08	9.87374e-07	TRUE	DOWN	YFL034C-A		DBP3	11.8706	-1.4794	0.570375	-2.59374	0.00949391	0.0442036	TRUE	DOWN	YGL078C_mRNA
HOM2	131.197	-2.00057	0.286759	-6.97649	3.02643e-12	2.3091e-10	TRUE	DOWN	YDR158W		RPL27A	663.84	-1.4843	0.303482	-4.89092	1.00367e-06	2.11022e-05	TRUE	DOWN	YHR010W_mRNA
LYS20	77.4777	-2.01971	0.311602	-6.48171	9.06917e-11	5.51221e-09	TRUE	DOWN	YDL182W		BRX1	27.1549	-1.48697	0.445494	-3.33781	0.000844415	0.00635784	TRUE	DOWN	YOL077C_mRNA
CPA2	9.72853	-2.02572	0.678414	-2.98596	0.00282689	0.0197333	TRUE	DOWN	YJR109C		RPL26A	218.466	-1.48852	0.309014	-4.81701	1.45728e-06	2.84895e-05	TRUE	DOWN	YLR344W_mRNA
NA.25	25.4108	-2.02685	0.462958	-4.37804	1.19751e-05	0.000192568	TRUE	DOWN	YLR264C-A		RPL18A	515.181	-1.48874	0.295369	-5.04028	4.64845e-07	1.18624e-05	TRUE	DOWN	YOL120C_mRNA
NA.17	55.2843	-2.03857	0.402071	-5.07017	3.97457e-07	1.00372e-05	TRUE	DOWN	snR57		RIB4	184.916	-1.49046	0.357822	-4.16538	3.10837e-05	0.000402762	TRUE	DOWN	YOL143C_mRNA
ILV2	72.0824	-2.04081	0.424682	-4.80549	1.54372e-06	3.12757e-05	TRUE	DOWN	YMR108W		NA.62	13.4017	-1.49538	0.579248	-2.58159	0.00983451	0.0454727	TRUE	DOWN	YML108W_mRNA
ARG4	26.6381	-2.05069	0.443958	-4.61911	3.85384e-06	6.84152e-05	TRUE	DOWN	YHR018C		RPL34A	331.824	-1.49607	0.333052	-4.492	7.0559e-06	0.000107707	TRUE	DOWN	YER056C-A_mRNA
NA.50	12.9639	-2.05671	0.60915	-3.37636	0.000734509	0.0063776	TRUE	DOWN	snR3		NRK1	14.115	-1.49697	0.590349	-2.53573	0.0112212	0.0497513	TRUE	DOWN	YNL129W_mRNA
AGA2	29.3606	-2.07108	0.486756	-4.25487	2.09175e-05	0.000317839	TRUE	DOWN	YGL032C		RPL35A	432.323	-1.50798	0.310605	-4.85498	1.204e-06	2.43938e-05	TRUE	DOWN	YDL191W_mRNA
RPS10A	366.003	-2.07618	0.275308	-7.54128	4.65364e-14	4.51026e-12	TRUE	DOWN	YOR293W		RPL17B	154.316	-1.51654	0.347576	-4.36319	1.28181e-05	0.000186308	TRUE	DOWN	YJL177W_mRNA
PCL5	73.4699	-2.09697	0.328989	-6.37398	1.84184e-10	1.08276e-08	TRUE	DOWN	YHR071W		URA4	20.9417	-1.52025	0.479724	-3.169	0.00152965	0.0102889	TRUE	DOWN	YLR420W_mRNA
NA.65	10.0731	-2.10303	0.694846	-3.02661	0.0024731	0.0177017	TRUE	DOWN	YNL284C-B		RPL33B	340.209	-1.52149	0.305966	-4.97274	6.60124e-07	1.58762e-05	TRUE	DOWN	YOR234C_mRNA
ALD5	64.5884	-2.1201	0.335484	-6.31954	2.62342e-10	1.49327e-08	TRUE	DOWN	YER073W		DBP9	21.6281	-1.52214	0.456262	-3.33611	0.000849603	0.00636821	TRUE	DOWN	YLR276C_mRNA
HOM3	18.1111	-2.12699	0.513544	-4.14179	3.4461e-05	0.000488447	TRUE	DOWN	YER052C		SRP14	32.6317	-1.52338	0.42204	-3.60957	0.000306706	0.0028006	TRUE	DOWN	YDL092W_mRNA
NNF1	17.5647	-2.15019	0.520454	-4.13137	3.60612e-05	0.000501222	TRUE	DOWN	YJR112W		RPL40A	608.463	-1.52649	0.294327	-5.18639	2.14409e-07	6.02326e-06	TRUE	DOWN	YIL148W_mRNA
RPS28A	528.567	-2.17428	0.279964	-7.7663	8.08098e-15	9.34787e-13	TRUE	DOWN	YOR167C		TRX1	185.929	-1.52932	0.310895	-4.91909	8.69469e-07	1.91226e-05	TRUE	DOWN	YLR043C_mRNA
TOM5	15.2519	-2.17855	0.601093	-3.62432	0.000289728	0.00299413	TRUE	DOWN	YPR133W-A		DIM1	13.1019	-1.53105	0.592796	-2.58275	0.00980158	0.0453832	TRUE	DOWN	YPL266W_mRNA
RRP42	7.08992	-2.19638	0.773126	-2.8409	0.00449863	0.0286538	TRUE	DOWN	YDL111C		ATP18	40.2196	-1.53325	0.378783	-4.04783	5.16936e-05	0.000633457	TRUE	DOWN	YML081C-A_mRNA
ARG1	238.215	-2.21513	0.708628	-3.12594	0.00177235	0.0134086	TRUE	DOWN	YOL058W		MAK5	11.2298	-1.53328	0.586063	-2.61624	0.00889038	0.041801	TRUE	DOWN	YBR142W_mRNA
NA.88	5.87857	-2.22203	0.846114	-2.62616	0.00863533	0.0477139	TRUE	DOWN	snR87		RPL12A	300.288	-1.54372	0.325786	-4.73846	2.15345e-06	4.02177e-05	TRUE	DOWN	YEL054C_mRNA
URA1	28.47	-2.22726	0.433979	-5.13218	2.86408e-07	7.49677e-06	TRUE	DOWN	YKL216W		NHP2	103.583	-1.55119	0.316802	-4.89639	9.76147e-07	2.09183e-05	TRUE	DOWN	YDL208W_mRNA
SRD1	12.3233	-2.2401	0.631134	-3.54933	0.000386216	0.00384714	TRUE	DOWN	YCR018C		LYS21	17.0946	-1.55196	0.507984	-3.05514	0.00224953	0.0142159	TRUE	DOWN	YDL131W_mRNA
NA.86	6.02716	-2.25291	0.841224	-2.67813	0.00740341	0.0425459	TRUE	DOWN	snR48		NA.30	26.3985	-1.55511	0.439478	-3.53853	0.000402356	0.00346669	TRUE	DOWN	YGR079W_mRNA
ORT1	6.078	-2.28463	0.866647	-2.63618	0.0083846	0.0467102	TRUE	DOWN	YOR130C		RPL20A	184.804	-1.56575	0.31287	-5.00445	5.60204e-07	1.39407e-05	TRUE	DOWN	YMR242C_mRNA
CNS1	6.71199	-2.30139	0.815716	-2.82132	0.00478271	0.0299839	TRUE	DOWN	YBR155W		RPS16B	336.889	-1.56633	0.3	-5.22111	1.77853e-07	5.30861e-06	TRUE	DOWN	YDL083C_mRNA
RPS11B	72.9532	-2.39153	0.355799	-6.72157	1.79778e-11	1.26409e-09	TRUE	DOWN	YBR048W		CCW14	15.2331	-1.56716	0.555771	-2.81979	0.00480544	0.0259525	TRUE	DOWN	YLR390W-A_mRNA
CIN2	10.2473	-2.41079	0.684023	-3.52443	0.000424387	0.00414674	TRUE	DOWN	YPL241C		RPB9	13.7135	-1.56747	0.563129	-2.78349	0.00537768	0.028095	TRUE	DOWN	YGL070C_mRNA
RPS27B	434.796	-2.41132	0.2861	-8.42824	3.50894e-17	6.62267e-15	TRUE	DOWN	YHR021C		STE18	10.8454	-1.57252	0.611302	-2.5724	0.0100995	0.0461758	TRUE	DOWN	YJR086W_mRNA
CPA1	13.0387	-2.42712	0.676043	-3.59018	0.000330448	0.00334742	TRUE	DOWN	YOR303W		ASN1	78.2837	-1.57426	0.337105	-4.66992	3.01313e-06	5.35793e-05	TRUE	DOWN	YPR145W_mRNA
RPL29	235.47	-2.44198	0.297536	-8.20736	2.26096e-16	3.68536e-14	TRUE	DOWN	YFR032C-A		ASP1	23.999	-1.57527	0.478288	-3.29357	0.000989232	0.00721109	TRUE	DOWN	YDR321W_mRNA
RPL40B	470.825	-2.44965	0.268151	-9.13534	6.5203e-20	1.94848e-17	TRUE	DOWN	YKR094C		NTF2	42.1203	-1.57688	0.440211	-3.58209	0.000340853	0.00306309	TRUE	DOWN	YER009W_mRNA
NA.41	10.3806	-2.45515	0.683632	-3.59133	0.000329	0.00334742	TRUE	DOWN	YGL117W		RIB5	26.0388	-1.57947	0.436466	-3.61878	0.000295999	0.00273349	TRUE	DOWN	YBR256C_mRNA
NA.61	9.71036	-2.45956	0.787349	-3.12384	0.00178506	0.013448	TRUE	DOWN	snR40		NA.57	11.4808	-1.58211	0.578247	-2.73605	0.00621822	0.031544	TRUE	DOWN	YKL030W_mRNA
ARG7	21.1799	-2.46262	0.529143	-4.65397	3.25604e-06	5.95722e-05	TRUE	DOWN	YMR062C		ARO8	11.1805	-1.58271	0.593963	-2.66466	0.00770665	0.0375012	TRUE	DOWN	YGL202W_mRNA
NA.3	157.862	-2.46466	0.323765	-7.6125	2.68844e-14	2.92144e-12	TRUE	DOWN	YIL053W		HTB2	66.3319	-1.59279	0.405867	-3.92442	8.694e-05	0.000981893	TRUE	DOWN	YBL002W_mRNA
NA.75	6.33946	-2.48541	0.889684	-2.79358	0.00521273	0.0322291	TRUE	DOWN	snR46		NIP7	19.4461	-1.597	0.532877	-2.99694	0.00272706	0.0164559	TRUE	DOWN	YPL211W_mRNA
NA.48	8.32544	-2.5654	0.757713	-3.38572	0.000709927	0.00625504	TRUE	DOWN	YOR142W-B		ACO2	20.3351	-1.6097	0.493748	-3.26017	0.00111345	0.00788373	TRUE	DOWN	YJL200C_mRNA
RPS29A	37.3624	-2.56543	0.425159	-6.03405	1.59898e-09	7.16742e-08	TRUE	DOWN	YLR388W		HIS4	34.5115	-1.61136	0.409921	-3.93091	8.46244e-05	0.000962243	TRUE	DOWN	YCL030C_mRNA
FUR1	13.8673	-2.57102	0.613007	-4.19411	2.73941e-05	0.00040096	TRUE	DOWN	YHR128W		BUD20	16.6371	-1.62475	0.521249	-3.11703	0.00182685	0.0119281	TRUE	DOWN	YLR074C_mRNA
RPS29B	108.913	-2.57691	0.367392	-7.01406	2.31502e-12	1.84481e-10	TRUE	DOWN	YDL061C		SNG1	10.7158	-1.62777	0.611316	-2.66274	0.00775077	0.0375519	TRUE	DOWN	YGR197C_mRNA
NA.79	5.50928	-2.59425	0.945428	-2.74399	0.00606967	0.0364587	TRUE	DOWN	tF(GAA)P1		RPL35B	122.098	-1.63199	0.336911	-4.84398	1.27267e-06	2.53245e-05	TRUE	DOWN	YDL136W_mRNA
ARG8	9.1148	-2.60548	0.725627	-3.59066	0.000329843	0.00334742	TRUE	DOWN	YOL140W		MPC2	71.477	-1.63676	0.327122	-5.00351	5.62965e-07	1.39407e-05	TRUE	DOWN	YHR162W_mRNA
VTS1	4.55593	-2.63587	1.00127	-2.63253	0.00847508	0.0470078	TRUE	DOWN	YOR359W		BUD19	154.328	-1.63776	0.450115	-3.63853	0.000274203	0.00256767	TRUE	DOWN	YJL188C_mRNA
RPS11A	140.833	-2.64287	0.359267	-7.3563	1.89075e-13	1.69505e-11	TRUE	DOWN	YDR025W		BOL1	16.6933	-1.64513	0.504788	-3.25906	0.00111782	0.00788373	TRUE	DOWN	YAL044W-A_mRNA
AAH1	6.21452	-2.66173	0.915513	-2.90736	0.00364492	0.0242499	TRUE	DOWN	YNL141W		OPI11	523.288	-1.65216	0.320769	-5.15061	2.59641e-07	7.23316e-06	TRUE	DOWN	YPR044C_mRNA
URK1	5.10791	-2.68324	1.01618	-2.64052	0.00827801	0.0462577	TRUE	DOWN	YNR012W		HXT1	36.419	-1.65354	0.406278	-4.06998	4.70175e-05	0.00058431	TRUE	DOWN	YHR094C_mRNA
NA.81	5.02998	-2.70426	0.988983	-2.73438	0.00624974	0.0372905	TRUE	DOWN	tG(GCC)P1		RPL36A	213.288	-1.65357	0.297769	-5.55319	2.80499e-08	9.76778e-07	TRUE	DOWN	YMR194W_mRNA
NA.59	7.1186	-2.73569	0.861256	-3.1764	0.00149114	0.0114879	TRUE	DOWN	snR47		ALB1	17.8591	-1.6681	0.548024	-3.04385	0.0023357	0.0145405	TRUE	DOWN	YJL122W_mRNA
NA.23	15.9361	-2.74201	0.62298	-4.40144	1.07535e-05	0.00017689	TRUE	DOWN	snR45		SPO24	196.797	-1.67041	0.366367	-4.55939	5.13016e-06	8.08968e-05	TRUE	DOWN	YPR036W-A_mRNA
NA.67	5.28545	-2.83343	0.966798	-2.93073	0.00338164	0.0228372	TRUE	DOWN	tG(GCC)G1		TIP1	35.6954	-1.67048	0.500239	-3.33936	0.000839702	0.00635096	TRUE	DOWN	YBR067C_mRNA
STB4	4.28127	-2.8925	1.07496	-2.69081	0.00712796	0.0414277	TRUE	DOWN	YMR019W		HAS1	10.9395	-1.67348	0.619434	-2.70163	0.00690009	0.0343259	TRUE	DOWN	YMR290C_mRNA
VHT1	7.74224	-2.92408	0.845786	-3.45724	0.000545744	0.00507005	TRUE	DOWN	YGR065C		RPL31A	488.35	-1.67651	0.321858	-5.20885	1.9001e-07	5.48433e-06	TRUE	DOWN	YDL075W_mRNA
NA.35	9.38519	-2.9348	0.784236	-3.74224	0.000182386	0.00203117	TRUE	DOWN	snR68		RRB1	15.6174	-1.68297	0.536774	-3.13534	0.00171656	0.0113633	TRUE	DOWN	YMR131C_mRNA
ATG41	28.6887	-2.9462	0.479283	-6.1471	7.89144e-10	3.93037e-08	TRUE	DOWN	YPL250C		RPL13B	500.635	-1.68313	0.339181	-4.96232	6.96554e-07	1.65984e-05	TRUE	DOWN	YMR142C_mRNA
TEA1	5.77836	-3.07961	0.980375	-3.14125	0.00168226	0.0128605	TRUE	DOWN	YOR337W		GSP1	137.383	-1.68478	0.332074	-5.0735	3.90562e-07	1.02004e-05	TRUE	DOWN	YLR293C_mRNA
NA.42	7.29287	-3.08906	0.875984	-3.52638	0.000421277	0.0041276	TRUE	DOWN	snR62		RPB10	24.7711	-1.68653	0.494235	-3.41242	0.000643897	0.00510083	TRUE	DOWN	YOR210W_mRNA
FYV4	3.87174	-3.15041	1.16074	-2.71413	0.006645	0.039128	TRUE	DOWN	YHR059W		FSF1	41.4308	-1.69896	0.497727	-3.41343	0.000641504	0.00509394	TRUE	DOWN	YOR271C_mRNA
NA.45	6.55661	-3.18032	0.937523	-3.39226	0.000693188	0.0061529	TRUE	DOWN	snR54		NOP15	40.0479	-1.70363	0.377605	-4.51168	6.43173e-06	0.000100006	TRUE	DOWN	YNL110C_mRNA
TRM1	6.76508	-3.22065	0.908909	-3.54342	0.000394976	0.00390188	TRUE	DOWN	YDR120C		DRE2	27.0806	-1.71086	0.434867	-3.93421	8.34693e-05	0.000952348	TRUE	DOWN	YKR071C_mRNA
RPS30B	76.1629	-3.30908	0.399497	-8.28314	1.19972e-16	2.15111e-14	TRUE	DOWN	YOR182C		PSE1	9.80561	-1.72252	0.669601	-2.57246	0.010098	0.0461758	TRUE	DOWN	YMR308C_mRNA
NA.43	6.6797	-3.31019	0.949969	-3.48452	0.000493017	0.00465252	TRUE	DOWN	tH(GUG)E2		LHP1	84.8904	-1.72324	0.339546	-5.07512	3.8725e-07	1.01935e-05	TRUE	DOWN	YDL051W_mRNA
OAC1	42.6659	-3.33163	0.433316	-7.68868	1.48659e-14	1.66591e-12	TRUE	DOWN	YKL120W		NA.17	34.7841	-1.72752	0.435423	-3.96745	7.26471e-05	0.000855138	TRUE	DOWN	YDL121C_mRNA
UPS1	5.87321	-3.34387	0.993264	-3.36655	0.000761145	0.00656122	TRUE	DOWN	YLR193C		RPS20	456.96	-1.73111	0.331896	-5.21582	1.83007e-07	5.40875e-06	TRUE	DOWN	YHL015W_mRNA
BAT1	73.7095	-3.39295	0.358299	-9.46959	2.80958e-21	1.00751e-18	TRUE	DOWN	YHR208W		RPS7A	796.219	-1.7317	0.28357	-6.1068	1.0165e-09	4.99731e-08	TRUE	DOWN	YOR096W_mRNA
YMC1	4.42725	-3.39805	1.14495	-2.96786	0.00299881	0.0207601	TRUE	DOWN	YPR058W		RPS13	539.518	-1.73302	0.308258	-5.62199	1.88765e-08	6.85916e-07	TRUE	DOWN	YDR064W_mRNA
NA.11	18.5241	-3.51486	0.623654	-5.6359	1.74142e-08	6.30782e-07	TRUE	DOWN	snR128		SAM4	56.7879	-1.73321	0.394306	-4.39559	1.10472e-05	0.00016487	TRUE	DOWN	YPL273W_mRNA
ARG3	8.51504	-3.57018	0.878225	-4.06522	4.79869e-05	0.000639706	TRUE	DOWN	YJL088W		APQ12	9.42655	-1.73328	0.644136	-2.69086	0.00712684	0.0352221	TRUE	DOWN	YIL040W_mRNA
NA.18	12.6933	-3.6936	0.741123	-4.98378	6.23534e-07	1.48079e-05	TRUE	DOWN	YOL118C		NA.10	79.0772	-1.73478	0.355627	-4.87808	1.07125e-06	2.19705e-05	TRUE	DOWN	YPR170W-B_mRNA
NA.26	9.7514	-3.81368	0.872157	-4.3727	1.22718e-05	0.000196459	TRUE	DOWN	snR39B		NA.15	36.7836	-1.73622	0.41382	-4.19559	2.72158e-05	0.000361041	TRUE	DOWN	YLR264C-A_mRNA
NA.70	3.90255	-3.82986	1.32801	-2.88391	0.00392773	0.0257299	TRUE	DOWN	tK(UUU)D		SEC66	13.775	-1.74071	0.570237	-3.0526	0.00226868	0.0143098	TRUE	DOWN	YBR171W_mRNA
NOC4	3.97842	-3.92465	1.33912	-2.93077	0.00338127	0.0228372	TRUE	DOWN	YPR144C		OST3	23.8975	-1.74251	0.463337	-3.76078	0.000169386	0.0017264	TRUE	DOWN	YOR085W_mRNA
LEU1	183.927	-3.94953	0.308747	-12.7921	1.8145e-37	1.6267e-34	TRUE	DOWN	YGL009C		RPA43	18.658	-1.74264	0.509013	-3.42357	0.000618036	0.00497854	TRUE	DOWN	YOR340C_mRNA
NA.55	4.84054	-4.08628	1.25538	-3.25501	0.00113388	0.00919932	TRUE	DOWN	tG(GCC)F2		HMF1	30.6846	-1.7436	0.457345	-3.81245	0.000137597	0.00145586	TRUE	DOWN	YER057C_mRNA
NA.30	7.48334	-4.09687	1.06594	-3.84343	0.000121326	0.0014649	TRUE	DOWN	tN(GUU)K		RPL6B	240.036	-1.7459	0.317831	-5.49316	3.94794e-08	1.30673e-06	TRUE	DOWN	YLR448W_mRNA
NA.22	9.69321	-4.19827	0.929226	-4.51803	6.24187e-06	0.000107097	TRUE	DOWN	snR52		RPA34	17.3108	-1.75055	0.533454	-3.28154	0.00103241	0.00747047	TRUE	DOWN	YJL148W_mRNA
ARG5,6	7.67902	-4.22905	1.06118	-3.98523	6.74137e-05	0.000866472	TRUE	DOWN	YER069W		SIT1	8.94271	-1.75355	0.68178	-2.57201	0.0101109	0.0461758	TRUE	DOWN	YEL065W_mRNA
SOE1	10.9847	-4.31319	0.92328	-4.67159	2.98873e-06	5.58208e-05	TRUE	DOWN	tE(UUC)G1		GLY1	52.5588	-1.76701	0.38125	-4.63477	3.57337e-06	6.09478e-05	TRUE	DOWN	YEL046C_mRNA
NA.60	3.51624	-4.60201	1.46529	-3.14068	0.00168557	0.0128605	TRUE	DOWN	tV(AAC)O		HTL1	9.11217	-1.77125	0.69359	-2.55374	0.0106572	0.04821	TRUE	DOWN	YCR020W-B_mRNA
NA.53	4.12975	-4.81819	1.43633	-3.35453	0.000795009	0.00676619	TRUE	DOWN	YNL162W-A		OST4	22.6902	-1.7784	0.512051	-3.47308	0.000514517	0.00424699	TRUE	DOWN	YDL232W_mRNA
NA.6	8688.27	-5.49126	0.88264	-6.2214	4.9274e-10	2.56082e-08	TRUE	DOWN	SCR1		RPL17A	157.414	-1.78299	0.372812	-4.78255	1.73088e-06	3.30648e-05	TRUE	DOWN	YKL180W_mRNA
HIS3	39.4453	-5.62486	0.706629	-7.96013	1.71859e-15	2.46514e-13	TRUE	DOWN	YOR202W		RPL20B	494.54	-1.78586	0.307125	-5.81476	6.07216e-09	2.41658e-07	TRUE	DOWN	YOR312C_mRNA
NA.1	67.5674	-5.78954	0.624254	-9.27433	1.7874e-20	5.82694e-18	TRUE	DOWN	ETS2-2		NA.56	9.96982	-1.789	0.648257	-2.7597	0.00578545	0.029755	TRUE	DOWN	YGL088W_mRNA
MAE1	4.33209	-5.89391	1.42258	-4.14311	3.4263e-05	0.000488447	TRUE	DOWN	YKL029C		NA.24	25.3504	-1.79055	0.476026	-3.76145	0.000168934	0.0017264	TRUE	DOWN	YIL002W-A_mRNA
NA.21	5.70272	-6.30246	1.3773	-4.57596	4.74042e-06	8.29226e-05	TRUE	DOWN	snR77		HIS1	60.965	-1.79448	0.367293	-4.88569	1.03067e-06	2.15347e-05	TRUE	DOWN	YER055C_mRNA
NA.9	11.8271	-7.34282	1.29806	-5.65675	1.5427e-08	5.70322e-07	TRUE	DOWN	snR86		TRM82	11.7496	-1.79457	0.592697	-3.0278	0.00246344	0.0151384	TRUE	DOWN	YDR165W_mRNA
NA.5	62.191	-8.77351	1.25649	-6.98254	2.89893e-12	2.2599e-10	TRUE	DOWN	ETS2-1		ARO4	56.9262	-1.81593	0.34875	-5.20698	1.91943e-07	5.48433e-06	TRUE	DOWN	YBR249C_mRNA
											RFU1	19.7206	-1.82735	0.493369	-3.70382	0.000212375	0.00207593	TRUE	DOWN	YLR073C_mRNA
											GCV1	13.7489	-1.82931	0.555461	-3.29333	0.000990096	0.00721109	TRUE	DOWN	YDR019C_mRNA
											RPB8	45.3735	-1.83064	0.382673	-4.78384	1.71977e-06	3.30414e-05	TRUE	DOWN	YOR224C_mRNA
											RPS19A	321.668	-1.83467	0.331231	-5.53894	3.04304e-08	1.03805e-06	TRUE	DOWN	YOL121C_mRNA
											ILV1	15.1951	-1.89025	0.532701	-3.54842	0.000387546	0.00336511	TRUE	DOWN	YER086W_mRNA
											YTM1	9.46706	-1.89269	0.698517	-2.70958	0.00673687	0.0337262	TRUE	DOWN	YOR272W_mRNA
											CPA2	9.17693	-1.89316	0.677204	-2.79556	0.00518106	0.0273622	TRUE	DOWN	YJR109C_mRNA
											MFA2	28.9525	-1.93138	0.510624	-3.78239	0.000155327	0.00160761	TRUE	DOWN	YNL145W_mRNA
											RPL37A	422.131	-1.93443	0.32539	-5.94497	2.76512e-09	1.26627e-07	TRUE	DOWN	YLR185W_mRNA
											NA.19	23.2833	-1.939	0.497769	-3.89538	9.80435e-05	0.00107842	TRUE	DOWN	YOL013W-A_mRNA
											NCE103	16.2832	-1.95769	0.563046	-3.47696	0.000507134	0.00420682	TRUE	DOWN	YNL036W_mRNA
											TRM7	7.33586	-1.96196	0.723487	-2.71182	0.00669153	0.0336388	TRUE	DOWN	YBR061C_mRNA
											PCC1	11.4514	-1.96198	0.649332	-3.02154	0.00251489	0.0153724	TRUE	DOWN	YKR095W-A_mRNA
											NNF1	15.0387	-1.96467	0.542157	-3.6238	0.000290306	0.00270332	TRUE	DOWN	YJR112W_mRNA
											NA.14	16212.6	-1.97237	0.419745	-4.69897	2.61481e-06	4.72504e-05	TRUE	DOWN	YLR154C-G_mRNA
											RPS24B	143.325	-1.9748	0.321255	-6.14714	7.88942e-10	4.05759e-08	TRUE	DOWN	YIL069C_mRNA
											MEU1	9.47819	-1.97805	0.656637	-3.01239	0.00259199	0.0157546	TRUE	DOWN	YLR017W_mRNA
											PCL5	66.523	-1.97903	0.370953	-5.33498	9.55532e-08	3.04223e-06	TRUE	DOWN	YHR071W_mRNA
											SHM2	10.9385	-1.99236	0.624259	-3.19155	0.00141511	0.00965448	TRUE	DOWN	YLR058C_mRNA
											HMT1	23.6054	-1.99346	0.515189	-3.86938	0.000109112	0.00118429	TRUE	DOWN	YBR034C_mRNA
											HOM2	150.731	-1.99499	0.313821	-6.35708	2.05631e-10	1.28711e-08	TRUE	DOWN	YDR158W_mRNA
											RPS22A	470.78	-2.007	0.290054	-6.91939	4.53588e-12	3.6984e-10	TRUE	DOWN	YJL190C_mRNA
											RPA12	18.004	-2.01695	0.568279	-3.54922	0.000386375	0.00336368	TRUE	DOWN	YJR063W_mRNA
											RPA14	34.158	-2.02908	0.445025	-4.55947	5.12834e-06	8.08968e-05	TRUE	DOWN	YDR156W_mRNA
											ILV2	68.8612	-2.03014	0.452842	-4.48311	7.3564e-06	0.000111784	TRUE	DOWN	YMR108W_mRNA
											RPL39	7.1073	-2.03559	0.739405	-2.75302	0.0059049	0.0302762	TRUE	DOWN	YJL189W_mRNA
											RPL21A	253.599	-2.04075	0.343842	-5.93513	2.9361e-09	1.30872e-07	TRUE	DOWN	YBR191W_mRNA
											RPS10B	202.944	-2.04457	0.329207	-6.2106	5.27838e-10	2.84607e-08	TRUE	DOWN	YMR230W_mRNA
											RPL11B	193.249	-2.05442	0.323256	-6.35538	2.07908e-10	1.28711e-08	TRUE	DOWN	YGR085C_mRNA
											NCS2	5.90517	-2.05512	0.806867	-2.54704	0.0108642	0.0489475	TRUE	DOWN	YNL119W_mRNA
											THR4	14.8522	-2.05537	0.578479	-3.55307	0.000380769	0.00333223	TRUE	DOWN	YCR053W_mRNA
											URA1	25.9882	-2.05979	0.441479	-4.66567	3.07614e-06	5.36716e-05	TRUE	DOWN	YKL216W_mRNA
											SNU13	55.5005	-2.0703	0.423045	-4.89381	9.89044e-07	2.10597e-05	TRUE	DOWN	YEL026W_mRNA
											RPL33A	179.381	-2.07306	0.332635	-6.23222	4.59859e-10	2.52018e-08	TRUE	DOWN	YPL143W_mRNA
											RPL34B	240.816	-2.07525	0.332609	-6.23931	4.39503e-10	2.49027e-08	TRUE	DOWN	YIL052C_mRNA
											LYS20	79.2588	-2.07541	0.326294	-6.36056	2.01025e-10	1.28711e-08	TRUE	DOWN	YDL182W_mRNA
											RPL22B	51.5708	-2.07928	0.3779	-5.5022	3.75091e-08	1.25393e-06	TRUE	DOWN	YFL034C-A_mRNA
											KRR1	20.0415	-2.08465	0.53073	-3.92789	8.56956e-05	0.00097112	TRUE	DOWN	YCL059C_mRNA
											ARG4	30.8631	-2.08483	0.424735	-4.90853	9.17608e-07	2.00494e-05	TRUE	DOWN	YHR018C_mRNA
											AGA2	30.4562	-2.09609	0.472624	-4.43501	9.20677e-06	0.000138019	TRUE	DOWN	YGL032C_mRNA
											FIT3	7.04687	-2.09924	0.818682	-2.56417	0.0103423	0.0470401	TRUE	DOWN	YOR383C_mRNA
											NA.47	8.06908	-2.10972	0.727247	-2.90096	0.0037202	0.0212229	TRUE	DOWN	YGR160W_mRNA
											RPS10A	389.885	-2.11767	0.310609	-6.8178	9.24439e-12	7.02363e-10	TRUE	DOWN	YOR293W_mRNA
											RPL25	346.132	-2.12179	0.378482	-5.60604	2.07013e-08	7.44134e-07	TRUE	DOWN	YOL127W_mRNA
											ROK1	6.30908	-2.15218	0.808227	-2.66284	0.00774848	0.0375519	TRUE	DOWN	YGL171W_mRNA
											NSR1	130.308	-2.15331	0.341378	-6.30768	2.83242e-10	1.66119e-08	TRUE	DOWN	YGR159C_mRNA
											SRD1	11.942	-2.15602	0.617494	-3.49157	0.000480192	0.00405375	TRUE	DOWN	YCR018C_mRNA
											LSM7	11.3506	-2.1575	0.644383	-3.34817	0.000813482	0.00622305	TRUE	DOWN	YNL147W_mRNA
											ALD5	62.9235	-2.1917	0.351559	-6.23425	4.53954e-10	2.52018e-08	TRUE	DOWN	YER073W_mRNA
											MAE1	13.0179	-2.19266	0.589092	-3.7221	0.000197575	0.00195992	TRUE	DOWN	YKL029C_mRNA
											YAH1	21.8139	-2.19835	0.50641	-4.34105	1.41804e-05	0.000203455	TRUE	DOWN	YPL252C_mRNA
											ARX1	6.81748	-2.20344	0.839529	-2.62462	0.00867468	0.041134	TRUE	DOWN	YDR101C_mRNA
											TOM5	14.9476	-2.21629	0.600103	-3.69318	0.000221465	0.00215848	TRUE	DOWN	YPR133W-A_mRNA
											HOM3	18.407	-2.23207	0.508974	-4.38544	1.15754e-05	0.000170469	TRUE	DOWN	YER052C_mRNA
											ARG1	232.98	-2.23596	0.458025	-4.88173	1.05158e-06	2.18351e-05	TRUE	DOWN	YOL058W_mRNA
											RPS28A	539.543	-2.26522	0.317565	-7.13309	9.81388e-13	8.86697e-11	TRUE	DOWN	YOR167C_mRNA
											SNZ1	31.1941	-2.28961	0.439096	-5.21437	1.84445e-07	5.40875e-06	TRUE	DOWN	YMR096W_mRNA
											RRP42	7.26086	-2.30969	0.750305	-3.07833	0.00208161	0.01346	TRUE	DOWN	YDL111C_mRNA
											SDC1	6.93757	-2.31325	0.794287	-2.91236	0.0035871	0.0205689	TRUE	DOWN	YDR469W_mRNA
											SDT1	7.57976	-2.31889	0.757797	-3.06004	0.00221308	0.0140385	TRUE	DOWN	YGL224C_mRNA
											CPA1	28.881	-2.32451	0.447656	-5.19263	2.07342e-07	5.87411e-06	TRUE	DOWN	YOR303W_mRNA
											RPL7B	25.5197	-2.34258	0.48554	-4.8247	1.40216e-06	2.7573e-05	TRUE	DOWN	YPL198W_mRNA
											CNS1	7.42979	-2.35567	0.761111	-3.09504	0.00196784	0.0127986	TRUE	DOWN	YBR155W_mRNA
											ORT1	6.13085	-2.37979	0.8372	-2.84255	0.00447536	0.0244463	TRUE	DOWN	YOR130C_mRNA
											NA.16	14.0889	-2.3961	0.585126	-4.09502	4.22132e-05	0.000528996	TRUE	DOWN	YGL117W_mRNA
											RPS11B	84.6892	-2.40265	0.381407	-6.29944	2.98716e-10	1.72173e-08	TRUE	DOWN	YBR048W_mRNA
											FUR1	15.3515	-2.42069	0.562909	-4.30032	1.70552e-05	0.000238559	TRUE	DOWN	YHR128W_mRNA
											CIN2	9.85784	-2.43051	0.673398	-3.60931	0.000307007	0.0028006	TRUE	DOWN	YPL241C_mRNA
											NA.34	8.54288	-2.43898	0.723258	-3.37221	0.000745684	0.00580239	TRUE	DOWN	YGR164W_mRNA
											VHT1	8.07605	-2.47862	0.744606	-3.32877	0.0008723	0.00649465	TRUE	DOWN	YGR065C_mRNA
											GPP1	161.169	-2.48378	0.345527	-7.18838	6.55642e-13	6.26232e-11	TRUE	DOWN	YIL053W_mRNA
											FIT2	15.4113	-2.48414	0.579525	-4.28651	1.81502e-05	0.000252817	TRUE	DOWN	YOR382W_mRNA
											RPS29A	34.9735	-2.49501	0.426904	-5.84444	5.08287e-09	2.09778e-07	TRUE	DOWN	YLR388W_mRNA
											ARG7	21.5315	-2.49746	0.521402	-4.78989	1.66872e-06	3.24334e-05	TRUE	DOWN	YMR062C_mRNA
											RPL29	573.198	-2.49983	0.316727	-7.89269	2.95733e-15	4.70778e-13	TRUE	DOWN	YFR032C-A_mRNA
											RPS27B	443.468	-2.50134	0.327112	-7.64673	2.06154e-14	2.7567e-12	TRUE	DOWN	YHR021C_mRNA
											ARG8	9.2187	-2.51874	0.695658	-3.62066	0.000293854	0.00272876	TRUE	DOWN	YOL140W_mRNA
											RPL40B	487.621	-2.58279	0.314405	-8.21483	2.12458e-16	4.43905e-14	TRUE	DOWN	YKR094C_mRNA
											RPS11A	197.286	-2.63855	0.372848	-7.07674	1.47588e-12	1.29839e-10	TRUE	DOWN	YDR025W_mRNA
											RPS29B	108.832	-2.68621	0.396807	-6.76955	1.29187e-11	9.1888e-10	TRUE	DOWN	YDL061C_mRNA
											AAH1	6.428	-2.78439	0.886414	-3.14118	0.00168267	0.011161	TRUE	DOWN	YNL141W_mRNA
											ATG41	29.0437	-2.96228	0.481496	-6.15224	7.63971e-10	3.99055e-08	TRUE	DOWN	YPL250C_mRNA
											NA.25	8.52335	-3.07487	0.840588	-3.65799	0.000254196	0.00241407	TRUE	DOWN	YNL042W-B_mRNA
											NA.29	8.43709	-3.14421	0.881574	-3.56658	0.00036167	0.00320706	TRUE	DOWN	YOL118C_mRNA
											GAS2	5.29132	-3.23063	0.986399	-3.27518	0.00105595	0.00757521	TRUE	DOWN	YLR343W_mRNA
											TRM1	6.73752	-3.28139	0.893572	-3.67221	0.00024046	0.00230994	TRUE	DOWN	YDR120C_mRNA
											OAC1	42.4681	-3.39446	0.440752	-7.70152	1.34456e-14	1.88083e-12	TRUE	DOWN	YKL120W_mRNA
											RPS30B	77.1804	-3.42872	0.41899	-8.18329	2.76187e-16	5.43113e-14	TRUE	DOWN	YOR182C_mRNA
											BAT1	77.4964	-3.44496	0.37066	-9.29413	1.48418e-20	4.96161e-18	TRUE	DOWN	YHR208W_mRNA
											UPS1	6.13403	-3.47142	0.969348	-3.58119	0.000342033	0.00306546	TRUE	DOWN	YLR193C_mRNA
											ARG3	8.06349	-3.5547	0.871654	-4.07811	4.54033e-05	0.000566356	TRUE	DOWN	YJL088W_mRNA
											ARG5,6	11.2947	-3.82177	0.783346	-4.87877	1.06747e-06	2.19705e-05	TRUE	DOWN	YER069W_mRNA
											LEU1	185.779	-4.00435	0.332444	-12.0452	2.05536e-33	1.37421e-30	TRUE	DOWN	YGL009C_mRNA
											NA.23	6.36987	-4.02646	1.05702	-3.80927	0.000139379	0.00146679	TRUE	DOWN	YER097W_mRNA
											NA.6	15.6058	-4.07928	0.734432	-5.55432	2.78688e-08	9.76778e-07	TRUE	DOWN	YOR203W_mRNA
											HIS3	1008.45	-4.54293	0.35571	-12.7715	2.36638e-37	1.9777e-34	TRUE	DOWN	YOR202W_mRNA
24 hour post-sequencing initiation											24 hour post-sequencing initiation
gene name	gene base mean	log 2 fold change	lfcSE	stat	p-value	p-adjusted	significance	significance_reg	gene ID		transcript name	transcript base mean	log 2 fold change	lfcSE	stat	p-value	p-adjusted	significance	significance_reg	gene ID
HXT4	32.5585	7.24735	1.22683	5.9074	3.47542e-09	1.07155e-07	TRUE	UP	YHR092C		HXT4	29.9471	7.94333	1.23029	6.45646	1.07178e-10	4.82412e-09	TRUE	UP	YHR092C_mRNA
NA.22	31.6241	6.32119	1.07552	5.87733	4.16924e-09	1.24737e-07	TRUE	UP	YNL194C		COX26	7.84154	6.00749	1.29468	4.64013	3.48186e-06	4.91968e-05	TRUE	UP	YDR119W-A_mRNA
HXK1	41.4741	6.12858	0.892073	6.87004	6.41825e-12	3.36041e-10	TRUE	UP	YFR053C		URA3	618.088	5.75212	0.380447	15.1194	1.20663e-51	2.63408e-48	TRUE	UP	YEL021W_mRNA
URA3	678.803	5.56081	0.301204	18.462	4.17924e-76	1.83803e-72	TRUE	UP	YEL021W		HXT6	60.4463	5.49681	0.667311	8.23725	1.76219e-16	2.02466e-14	TRUE	UP	YDR343C_mRNA
COX26	8.7223	5.3274	1.29138	4.12535	3.70168e-05	0.00040397	TRUE	UP	YDR119W-A		HygR	430.819	5.38303	0.348969	15.4255	1.10313e-53	4.81625e-50	TRUE	UP	HygR
TMA10	388.472	5.31932	0.312387	17.028	5.09273e-65	1.11989e-61	TRUE	UP	YLR327C		NA.13	25.6972	5.25657	0.908229	5.78772	7.13494e-09	1.98415e-07	TRUE	UP	YOR062C_mRNA
HygR	466.592	5.10038	0.313278	16.2807	1.35332e-59	1.98397e-56	TRUE	UP	HygR		NA.37	8.75934	5.18928	1.29034	4.02162	5.77981e-05	0.000541516	TRUE	UP	YFR052C-A_mRNA
NA.63	7.22579	5.05775	1.30871	3.8647	0.000111228	0.00105655	TRUE	UP	YFL041W-A		TMA10	354.008	4.8563	0.339212	14.3164	1.72768e-46	2.51435e-43	TRUE	UP	YLR327C_mRNA
HXT6	63.3278	4.96711	0.543582	9.13773	6.37753e-20	1.03883e-17	TRUE	UP	YDR343C		HXK1	71.0999	4.70786	0.509434	9.24135	2.43409e-20	5.06058e-18	TRUE	UP	YFR053C_mRNA
HXT7	125.728	4.32376	0.37326	11.5838	4.9808e-31	2.43395e-28	TRUE	UP	YDR342C		NA.49	6.11111	4.64373	1.31637	3.52766	0.000419246	0.00299579	TRUE	UP	YFL041W-A_mRNA
CYC7	8.03633	4.29689	1.15745	3.71237	0.000205324	0.00177759	TRUE	UP	YEL039C		GPH1	54.8775	4.59448	0.552492	8.31592	9.10442e-17	1.07432e-14	TRUE	UP	YPR160W_mRNA
MPC3	20.2958	4.29105	0.760589	5.64174	1.68341e-08	4.48706e-07	TRUE	UP	YGR243W		AQY3	5.87757	4.59101	1.32323	3.46955	0.000521335	0.00360852	TRUE	UP	YFL054C_mRNA
AIM17	106.913	4.19116	0.392619	10.6749	1.33419e-26	3.91186e-24	TRUE	UP	YHL021C		GLC3	15.0486	4.45114	0.931042	4.78081	1.74589e-06	2.76179e-05	TRUE	UP	YEL011W_mRNA
NA.9	29.2296	4.13856	0.612567	6.75608	1.41772e-11	6.92793e-10	TRUE	UP	YOR062C		MSC1	161.681	4.33842	0.377217	11.5011	1.30199e-30	7.10563e-28	TRUE	UP	YML128C_mRNA
TSL1	31.4701	4.087	0.601455	6.79518	1.08174e-11	5.34551e-10	TRUE	UP	YML100W		AIM17	96.9425	4.33733	0.439841	9.86114	6.13467e-23	1.7856e-20	TRUE	UP	YHL021C_mRNA
IGD1	10.4275	4.06249	0.966039	4.20531	2.60729e-05	0.000300968	TRUE	UP	YFR017C		MPC3	18.7962	4.33302	0.825666	5.24791	1.53831e-07	3.09505e-06	TRUE	UP	YGR243W_mRNA
MSC1	179.977	4.03135	0.319754	12.6077	1.91565e-36	1.20357e-33	TRUE	UP	YML128C		NA.6	31.0956	4.27024	0.643293	6.63809	3.17771e-11	1.65165e-09	TRUE	UP	YNL194C_mRNA
GLC3	16.7405	4.02878	0.766936	5.25309	1.49566e-07	3.08823e-06	TRUE	UP	YEL011W		TSL1	29.6304	4.20665	0.656077	6.41182	1.43792e-10	6.27796e-09	TRUE	UP	YML100W_mRNA
GPH1	13.2472	4.0149	0.857852	4.68017	2.86631e-06	4.18805e-05	TRUE	UP	YPR160W		HXT7	112.721	4.16722	0.402619	10.3503	4.17273e-25	1.3013e-22	TRUE	UP	YDR342C_mRNA
NA.39	12.8722	3.91662	0.850162	4.60691	4.08695e-06	5.79819e-05	TRUE	UP	YER121W		EMI2	108.917	4.12614	0.393444	10.4872	9.88901e-26	3.59795e-23	TRUE	UP	YDR516C_mRNA
EMI2	120.837	3.88667	0.341616	11.3773	5.42648e-30	2.38657e-27	TRUE	UP	YDR516C		RME1	77.5499	3.99057	0.429622	9.28856	1.56391e-20	3.41401e-18	TRUE	UP	YGR044C_mRNA
SDP1	26.3456	3.77605	0.612231	6.16768	6.92998e-10	2.62265e-08	TRUE	UP	YIL113W		INO4	14.527	3.96829	0.838464	4.73281	2.21434e-06	3.35688e-05	TRUE	UP	YOL108C_mRNA
HXT2	37.9443	3.68894	0.521096	7.07918	1.45007e-12	8.5032e-11	TRUE	UP	YMR011W		TPO4	45.0696	3.89495	0.51181	7.61014	2.73803e-14	2.34397e-12	TRUE	UP	YOR273C_mRNA
GID8	5.32734	3.66654	1.21395	3.02034	0.0025249	0.0151288	TRUE	UP	YMR135C		CPD1	6.932	3.88134	1.16307	3.33714	0.000846455	0.00549127	TRUE	UP	YGR247W_mRNA
PHR1	5.12181	3.60261	1.22804	2.93364	0.00335012	0.0188171	TRUE	UP	YOR386W		LDS2	10.2253	3.87076	0.967371	4.00132	6.29901e-05	0.000583895	TRUE	UP	YOL047C_mRNA
ISF1	5.17752	3.59959	1.23033	2.92571	0.00343673	0.0191326	TRUE	UP	YMR081C		IGD1	9.89988	3.81031	0.962934	3.95698	7.59047e-05	0.000686279	TRUE	UP	YFR017C_mRNA
TFS1	181.738	3.55975	0.332934	10.6921	1.10873e-26	3.48298e-24	TRUE	UP	YLR178C		ALD4	72.3175	3.80978	0.424213	8.98081	2.68772e-19	4.69384e-17	TRUE	UP	YOR374W_mRNA
CPD1	7.25597	3.53706	1.01662	3.47925	0.000502818	0.00381933	TRUE	UP	YGR247W		UIP4	19.1669	3.77004	0.724102	5.2065	1.92436e-07	3.78458e-06	TRUE	UP	YPL186C_mRNA
NA.20	24.7193	3.53438	0.587508	6.01587	1.78921e-09	6.00684e-08	TRUE	UP	YER053C-A		TFS1	165.99	3.74933	0.350125	10.7085	9.28052e-27	4.05187e-24	TRUE	UP	YLR178C_mRNA
HSP30	71.8176	3.50083	0.420828	8.31891	8.87783e-17	9.78411e-15	TRUE	UP	YCR021C		SDP1	23.9521	3.67015	0.652556	5.62426	1.86305e-08	4.64804e-07	TRUE	UP	YIL113W_mRNA
ALD4	80.7916	3.49872	0.372909	9.38225	6.4579e-21	1.23486e-18	TRUE	UP	YOR374W		NA.64	5.97824	3.66125	1.18167	3.09836	0.00194597	0.0110626	TRUE	UP	YJR149W_mRNA
COQ3	16.2129	3.48309	0.699096	4.98228	6.28379e-07	1.07953e-05	TRUE	UP	YOL096C		HEM3	20.8167	3.65832	0.665319	5.4986	3.82827e-08	9.13347e-07	TRUE	UP	YDL205C_mRNA
SEC12	4.91337	3.48129	1.22379	2.84468	0.00444565	0.0234436	TRUE	UP	YNR026C		PEX22	14.9058	3.63833	0.772153	4.71194	2.45376e-06	3.66887e-05	TRUE	UP	YAL055W_mRNA
INO4	16.5881	3.47077	0.687819	5.04606	4.51025e-07	8.16299e-06	TRUE	UP	YOL108C		HSP30	64.5437	3.62517	0.48113	7.53471	4.89403e-14	3.95692e-12	TRUE	UP	YCR021C_mRNA
EGO4	28.0325	3.42944	0.544286	6.3008	2.96114e-10	1.17325e-08	TRUE	UP	YNR034W-A		EGO4	26.1157	3.60488	0.599109	6.01706	1.77609e-09	5.87456e-08	TRUE	UP	YNR034W-A_mRNA
AQY3	6.74499	3.42294	1.02815	3.32921	0.000870922	0.00616235	TRUE	UP	YFL054C		HSP42	91.1628	3.58596	0.379982	9.43718	3.82961e-21	9.28894e-19	TRUE	UP	YDR171W_mRNA
PGM2	27.5568	3.42223	0.555804	6.15726	7.40136e-10	2.75858e-08	TRUE	UP	YMR105C		RTC3	192.989	3.56945	0.335897	10.6266	2.24131e-26	8.89594e-24	TRUE	UP	YHR087W_mRNA
ATG20	15.9946	3.40436	0.683709	4.97925	6.38312e-07	1.09233e-05	TRUE	UP	YDL113C		NA.2	63.0952	3.54126	0.437594	8.09256	5.84215e-16	6.37671e-14	TRUE	UP	YLR177W_mRNA
PEX22	16.1175	3.40191	0.68666	4.95428	7.25968e-07	1.214e-05	TRUE	UP	YAL055W		CYC7	8.30565	3.53455	0.976596	3.61925	0.000295455	0.00218923	TRUE	UP	YEL039C_mRNA
SPG1	4.63378	3.37965	1.22951	2.74878	0.00598184	0.0295265	TRUE	UP	YGR236C		TMA17	81.8071	3.53158	0.413495	8.54081	1.33284e-17	1.87716e-15	TRUE	UP	YDL110C_mRNA
NA.3	69.5562	3.37787	0.383618	8.8053	1.30504e-18	1.85147e-16	TRUE	UP	YLR177W		HXT2	35.2488	3.52333	0.536183	6.57113	4.99333e-11	2.47737e-09	TRUE	UP	YMR011W_mRNA
RTC3	215.808	3.37426	0.277241	12.1709	4.44212e-34	2.44206e-31	TRUE	UP	YHR087W		RTS3	8.07317	3.51454	0.996811	3.52578	0.000422234	0.00301221	TRUE	UP	YGR161C_mRNA
GSY1	21.7565	3.35305	0.591227	5.67135	1.41679e-08	3.8944e-07	TRUE	UP	YFR015C		RGI1	35.9631	3.50716	0.543061	6.45815	1.05993e-10	4.82048e-09	TRUE	UP	YER067W_mRNA
AGP2	14.9672	3.32048	0.701931	4.73049	2.23982e-06	3.37354e-05	TRUE	UP	YBR132C		ATG20	18.6353	3.46002	0.671765	5.15065	2.59591e-07	4.86428e-06	TRUE	UP	YDL113C_mRNA
NA.6	41.4411	3.26115	0.445082	7.32709	2.35204e-13	1.61629e-11	TRUE	UP	YGR161W-C		GPP2	121.327	3.41471	0.37052	9.216	3.08386e-20	5.90472e-18	TRUE	UP	YER062C_mRNA
NA.2	133.841	3.25894	0.327942	9.93755	2.85775e-23	7.39318e-21	TRUE	UP	YER062C		NA.53	7.45812	3.37122	0.988346	3.41098	0.000647307	0.00434791	TRUE	UP	YPR195C_mRNA
NA.101	6.0794	3.24737	1.03878	3.12614	0.00177116	0.0112983	TRUE	UP	YJR149W		NA.3	49.6544	3.36377	0.445857	7.54452	4.5397e-14	3.73968e-12	TRUE	UP	YKR075C_mRNA
UBX5	26.2961	3.21957	0.532283	6.0486	1.46109e-09	4.94299e-08	TRUE	UP	YDR330W		COQ3	14.8085	3.36008	0.731472	4.59359	4.35685e-06	5.94438e-05	TRUE	UP	YOL096C_mRNA
PHM7	9.69894	3.21945	0.843047	3.81882	0.000134089	0.00124173	TRUE	UP	YOL084W		GSY1	19.5074	3.3551	0.642092	5.22525	1.73918e-07	3.46724e-06	TRUE	UP	YFR015C_mRNA
GDB1	15.9973	3.20957	0.671217	4.78172	1.73805e-06	2.69153e-05	TRUE	UP	YPR184W		GDB1	14.5092	3.34081	0.738761	4.52218	6.12057e-06	7.85954e-05	TRUE	UP	YPR184W_mRNA
SED1	404.034	3.1875	0.373841	8.52634	1.51051e-17	1.89806e-15	TRUE	UP	YDR077W		NA.30	12.0684	3.30496	0.789983	4.18358	2.8695e-05	0.000298291	TRUE	UP	YER121W_mRNA
GOR1	42.9171	3.16407	0.446049	7.09354	1.3072e-12	7.98481e-11	TRUE	UP	YNL274C		HSP12	1515.65	3.28708	0.28488	11.5385	8.44137e-31	5.265e-28	TRUE	UP	YFL014W_mRNA
MNS1	5.68817	3.15027	1.04948	3.00173	0.00268449	0.0159331	TRUE	UP	YJR131W		AGP2	13.9023	3.27224	0.735623	4.44826	8.65686e-06	0.00010707	TRUE	UP	YBR132C_mRNA
USV1	7.43387	3.12954	0.928036	3.37222	0.000745645	0.00539367	TRUE	UP	YPL230W		PHM7	8.91804	3.22924	0.892323	3.61891	0.000295842	0.00218923	TRUE	UP	YOL084W_mRNA
STF2	76.9877	3.08639	0.372253	8.29111	1.12199e-16	1.20354e-14	TRUE	UP	YGR008C		UBX5	24.7671	3.22103	0.566612	5.68471	1.31037e-08	3.38525e-07	TRUE	UP	YDR330W_mRNA
MAL31	5.57456	3.08322	1.05114	2.93321	0.00335474	0.018819	TRUE	UP	YBR298C		ATG3	8.91242	3.21835	0.882783	3.64569	0.000266676	0.00200397	TRUE	UP	YNR007C_mRNA
ATG3	9.09226	3.07813	0.83469	3.68775	0.000226249	0.00192838	TRUE	UP	YNR007C		NA.16	23.9821	3.17851	0.593328	5.35708	8.45769e-08	1.82803e-06	TRUE	UP	YJL144W_mRNA
TPS2	31.2843	3.07628	0.483381	6.36409	1.9645e-10	8.07466e-09	TRUE	UP	YDR074W		RRT15	47.7819	3.16829	0.479022	6.61408	3.73858e-11	1.89798e-09	TRUE	UP	YLR162W-A_mRNA
ENT1	25.2955	3.0681	0.53065	5.78176	7.39211e-09	2.12487e-07	TRUE	UP	YDL161W		NA.5	37.1142	3.15792	0.475091	6.64697	2.99182e-11	1.57377e-09	TRUE	UP	YGR161W-C_mRNA
HSP42	103.849	3.0404	0.327673	9.27876	1.71464e-20	3.04346e-18	TRUE	UP	YDR171W		TDH1	534.568	3.12263	0.335362	9.31124	1.26343e-20	2.90323e-18	TRUE	UP	YJL052W_mRNA
EIS1	7.17077	3.03848	0.917414	3.31201	0.000926286	0.00648696	TRUE	UP	YMR031C		MIG1	27.3306	3.11657	0.54771	5.69018	1.26907e-08	3.29806e-07	TRUE	UP	YGL035C_mRNA
FUN14	44.3016	3.03602	0.439395	6.90954	4.86228e-12	2.60784e-10	TRUE	UP	YAL008W		NA.18	21.1816	3.09755	0.596916	5.18926	2.11132e-07	4.10786e-06	TRUE	UP	YER053C-A_mRNA
RTN2	16.0152	3.03169	0.646379	4.69028	2.72836e-06	4.02662e-05	TRUE	UP	YDL204W		NA.9	37.13	3.08516	0.489236	6.30608	2.86195e-10	1.1788e-08	TRUE	UP	YNL134C_mRNA
MIG1	29.7069	3.02028	0.504838	5.98266	2.19517e-09	7.09878e-08	TRUE	UP	YGL035C		STF2	70.9812	3.07966	0.395213	7.7924	6.57508e-15	6.24061e-13	TRUE	UP	YGR008C_mRNA
GAD1	8.82736	3.01401	0.836489	3.60316	0.000314369	0.0025622	TRUE	UP	YMR250W		FAB1	6.06226	3.07657	1.03168	2.98209	0.00286287	0.0150259	TRUE	UP	YFR019W_mRNA
NA.138	5.08387	3.00804	1.11736	2.69211	0.00710021	0.0339421	TRUE	UP	YOR289W		MEF2	6.05724	3.04523	1.02119	2.98204	0.00286338	0.0150259	TRUE	UP	YJL102W_mRNA
YSC84	8.70984	3.00385	0.83486	3.59803	0.000320634	0.00260175	TRUE	UP	YHR016C		RTN2	14.3623	3.04121	0.696974	4.36345	1.28028e-05	0.000149842	TRUE	UP	YDL204W_mRNA
TMA17	91.7317	2.9848	0.336849	8.86093	7.93502e-19	1.17472e-16	TRUE	UP	YDL110C		GUT2	8.05629	3.03851	0.915916	3.31745	0.000908426	0.00581552	TRUE	UP	YIL155C_mRNA
PRY2	8.78523	2.96252	0.827043	3.58207	0.000340888	0.00274584	TRUE	UP	YKR013W		COS111	10.1687	3.03741	0.809808	3.75078	0.000176284	0.00142793	TRUE	UP	YBR203W_mRNA
COX5A	117.818	2.96206	0.313062	9.4616	3.03254e-21	6.35101e-19	TRUE	UP	YNL052W		GAD1	8.22169	3.03556	0.892074	3.40281	0.000666967	0.00445251	TRUE	UP	YMR250W_mRNA
KTR3	4.83456	2.95971	1.10972	2.66708	0.00765138	0.0360286	TRUE	UP	YBR205W		NNR1	37.8503	3.02637	0.469491	6.44607	1.14791e-10	5.11406e-09	TRUE	UP	YNL200C_mRNA
RME1	48.844	2.95701	0.411379	7.18804	6.57263e-13	4.12949e-11	TRUE	UP	YGR044C		PGM2	26.3186	3.02083	0.549869	5.49372	3.93544e-08	9.3381e-07	TRUE	UP	YMR105C_mRNA
NA.79	8.51199	2.95178	0.833091	3.54317	0.000395353	0.0030994	TRUE	UP	YPR195C		NA.45	9.76249	2.98301	0.811594	3.6755	0.000237387	0.00183115	TRUE	UP	YCL048W-A_mRNA
UBP11	5.31686	2.94903	1.05417	2.7975	0.00514996	0.026398	TRUE	UP	YKR098C		VHS3	9.60581	2.96271	0.806225	3.67479	0.000238043	0.00183297	TRUE	UP	YOR054C_mRNA
HSP12	1693.16	2.94857	0.227194	12.9782	1.62715e-38	1.1927e-35	TRUE	UP	YFL014W		PDR10	5.82721	2.95348	1.02526	2.88072	0.00396767	0.0195077	TRUE	UP	YOR328W_mRNA
NA.10	41.0804	2.9462	0.443249	6.64683	2.99476e-11	1.38642e-09	TRUE	UP	YNL134C		DDR2	48.262	2.94824	0.428184	6.88545	5.76071e-12	3.22452e-10	TRUE	UP	YOL052C-A_mRNA
NA.24	27.2044	2.94514	0.525234	5.60729	2.0552e-08	5.28583e-07	TRUE	UP	YJL144W		CTT1	11.3945	2.94764	0.751391	3.92291	8.74843e-05	0.000782698	TRUE	UP	YGR088W_mRNA
CKI1	4.90695	2.93538	1.09559	2.67927	0.00737819	0.0350046	TRUE	UP	YLR133W		NA.11	25797.3	2.88518	0.460179	6.2697	3.61751e-10	1.43582e-08	TRUE	UP	YLR154W-A_mRNA
HEM3	23.6099	2.93236	0.530362	5.52898	3.22104e-08	7.65736e-07	TRUE	UP	YDL205C		ODC1	12.9551	2.88282	0.726983	3.96546	7.3255e-05	0.000669103	TRUE	UP	YPL134C_mRNA
RNY1	5.04762	2.91076	1.06354	2.73686	0.00620294	0.0303545	TRUE	UP	YPL123C		MNS1	5.40327	2.87427	1.03787	2.7694	0.00561594	0.0258914	TRUE	UP	YJR131W_mRNA
NNR1	42.0667	2.91003	0.426546	6.82231	8.95854e-12	4.52869e-10	TRUE	UP	YNL200C		COX5A	108.051	2.85551	0.343374	8.31602	9.09634e-17	1.07432e-14	TRUE	UP	YNL052W_mRNA
TPO4	53.2524	2.90179	0.403258	7.19587	6.20642e-13	3.95592e-11	TRUE	UP	YOR273C		GLK1	209.261	2.8487	0.300698	9.47361	2.70344e-21	6.94306e-19	TRUE	UP	YCL040W_mRNA
NA.40	16.4613	2.88051	0.629565	4.57539	4.75324e-06	6.61542e-05	TRUE	UP	YHR097C		FMP48	14.5192	2.84638	0.669359	4.25239	2.115e-05	0.000229703	TRUE	UP	YGR052W_mRNA
MEF2	6.50626	2.86481	0.943352	3.03684	0.00239073	0.0144827	TRUE	UP	YJL102W		GAP1	14.1309	2.84487	0.681626	4.17365	2.99761e-05	0.000308669	TRUE	UP	YKR039W_mRNA
TDH1	594.539	2.85633	0.301629	9.46968	2.80705e-21	6.1727e-19	TRUE	UP	YJL052W		HER2	12.5705	2.84023	0.703648	4.03643	5.42702e-05	0.000509556	TRUE	UP	YMR293C_mRNA
YAK1	11.0222	2.85405	0.750126	3.80477	0.000141938	0.00130868	TRUE	UP	YJL141C		BDH2	39.3544	2.8344	0.450816	6.28727	3.23093e-10	1.31834e-08	TRUE	UP	YAL061W_mRNA
PDE1	34.6758	2.85304	0.462659	6.16661	6.97702e-10	2.62265e-08	TRUE	UP	YGL248W		TPS1	120.626	2.82067	0.376014	7.50151	6.30862e-14	5.0079e-12	TRUE	UP	YBR126C_mRNA
RTS3	9.38137	2.84395	0.799507	3.55713	0.000374934	0.00296635	TRUE	UP	YGR161C		ATG2	5.28243	2.82014	1.05195	2.68087	0.007343	0.0323706	TRUE	UP	YNL242W_mRNA
NBP35	11.4408	2.84101	0.72091	3.94086	8.11884e-05	0.00080602	TRUE	UP	YGL091C		SED1	375.893	2.81524	0.391552	7.18996	6.48113e-13	4.28737e-11	TRUE	UP	YDR077W_mRNA
SDH4	118.119	2.83649	0.306901	9.24235	2.41142e-20	4.07902e-18	TRUE	UP	YDR178W		SSA4	15.4431	2.79088	0.641323	4.35176	1.3505e-05	0.0001564	TRUE	UP	YER103W_mRNA
DDR2	57.3377	2.82756	0.385014	7.34403	2.07253e-13	1.44682e-11	TRUE	UP	YOL052C-A		USV1	6.79191	2.77881	0.923291	3.00969	0.00261518	0.0139925	TRUE	UP	YPL230W_mRNA
GSY2	40.8578	2.82427	0.429579	6.57451	4.8813e-11	2.21319e-09	TRUE	UP	YLR258W		FUN14	41.0109	2.77568	0.456423	6.08139	1.19148e-09	4.09608e-08	TRUE	UP	YAL008W_mRNA
FMP48	15.9819	2.81953	0.62864	4.48513	7.28688e-06	9.74095e-05	TRUE	UP	YGR052W		NA.19	20.5969	2.76707	0.565208	4.89567	9.79711e-07	1.64516e-05	TRUE	UP	YNL115C_mRNA
CTT1	12.4749	2.81889	0.685392	4.11281	3.9088e-05	0.000422381	TRUE	UP	YGR088W		TPK2	8.38078	2.75444	0.833212	3.30581	0.000947016	0.00603602	TRUE	UP	YPL203W_mRNA
HER2	12.3025	2.80423	0.690098	4.06353	4.83368e-05	0.000507363	TRUE	UP	YMR293C		SDH4	110.046	2.75024	0.327229	8.40463	4.29224e-17	5.67877e-15	TRUE	UP	YDR178W_mRNA
ACH1	13.3836	2.75986	0.672611	4.10321	4.0746e-05	0.000438144	TRUE	UP	YBL015W		NA.27	15.1976	2.74509	0.647845	4.23726	2.26269e-05	0.000243323	TRUE	UP	YHR097C_mRNA
OM45	55.0271	2.75778	0.37469	7.36017	1.83672e-13	1.32424e-11	TRUE	UP	YIL136W		YAK1	21.625	2.73879	0.576533	4.75045	2.02964e-06	3.15352e-05	TRUE	UP	YJL141C_mRNA
MRPL13	67.4832	2.75189	0.349245	7.87955	3.28559e-15	3.07447e-13	TRUE	UP	YKR006C		GSY2	36.9611	2.72903	0.45291	6.02554	1.68541e-09	5.61719e-08	TRUE	UP	YLR258W_mRNA
ALD6	233.131	2.75171	0.351091	7.8376	4.5923e-15	4.12182e-13	TRUE	UP	YPL061W		DFG5	22.8647	2.70233	0.537386	5.02866	4.93929e-07	8.62597e-06	TRUE	UP	YMR238W_mRNA
NA.36	21.8311	2.73442	0.569902	4.79806	1.60208e-06	2.50924e-05	TRUE	UP	YNR040W		GOR1	48.1462	2.67786	0.417786	6.40964	1.45862e-10	6.30529e-09	TRUE	UP	YNL274C_mRNA
GAL83	19.3487	2.73411	0.594465	4.59928	4.23963e-06	5.97625e-05	TRUE	UP	YER027C		ALD6	214.433	2.66689	0.361076	7.38595	1.51368e-13	1.10145e-11	TRUE	UP	YPL061W_mRNA
GAP1	15.6604	2.71972	0.635679	4.27845	1.88196e-05	0.000223096	TRUE	UP	YKR039W		MHP1	8.15155	2.6589	0.838552	3.17082	0.00152011	0.009104	TRUE	UP	YJL042W_mRNA
NA.33	23.6617	2.68686	0.54639	4.91747	8.76702e-07	1.4441e-05	TRUE	UP	YJR115W		RNY1	6.4296	2.6522	0.922136	2.87615	0.0040256	0.0197038	TRUE	UP	YPL123C_mRNA
GGA1	29.107	2.67689	0.484438	5.52577	3.28045e-08	7.75668e-07	TRUE	UP	YDR358W		ARO9	17.5114	2.65069	0.587221	4.51395	6.36303e-06	8.07587e-05	TRUE	UP	YHR137W_mRNA
DFG5	25.6214	2.67044	0.500438	5.33621	9.49083e-08	2.00676e-06	TRUE	UP	YMR238W		ACH1	12.3479	2.61091	0.692409	3.77076	0.000162748	0.00133313	TRUE	UP	YBL015W_mRNA
SOL1	15.9081	2.67015	0.602076	4.4349	9.21133e-06	0.000118109	TRUE	UP	YNR034W		EIS1	16.8591	2.60684	0.609091	4.27989	1.86985e-05	0.000207202	TRUE	UP	YMR031C_mRNA
COS111	11.3931	2.67006	0.70657	3.77891	0.000157517	0.00143133	TRUE	UP	YBR203W		ENT1	37.3108	2.60572	0.438707	5.93954	2.85829e-09	8.91378e-08	TRUE	UP	YDL161W_mRNA
ODC1	14.5555	2.66587	0.655554	4.0666	4.7705e-05	0.000503134	TRUE	UP	YPL134C		SPS19	13.9137	2.60143	0.641251	4.0568	4.9749e-05	0.000474245	TRUE	UP	YNL202W_mRNA
YJU3	45.147	2.6566	0.439129	6.04971	1.4511e-09	4.94299e-08	TRUE	UP	YKL094W		ATG26	12.5689	2.59628	0.693155	3.7456	0.000179961	0.00145233	TRUE	UP	YLR189C_mRNA
VID28	5.5778	2.65227	1.00497	2.63915	0.00831132	0.0383157	TRUE	UP	YIL017C		NA.71	7.55907	2.5874	0.852131	3.03639	0.00239432	0.0130834	TRUE	UP	YOL075C_mRNA
DCS2	7.24426	2.6454	0.854531	3.09573	0.00196327	0.0122301	TRUE	UP	YOR173W		MRPL13	62.9244	2.58532	0.366842	7.04752	1.82138e-12	1.10446e-10	TRUE	UP	YKR006C_mRNA
NA.67	11.2503	2.63745	0.700607	3.76452	0.000166871	0.00149377	TRUE	UP	YCL048W-A		PYK2	10.6289	2.58179	0.727683	3.54796	0.000388222	0.00278455	TRUE	UP	YOR347C_mRNA
FAB1	6.80462	2.62771	0.888217	2.95841	0.00309235	0.0178012	TRUE	UP	YFR019W		ULA1	19.5563	2.5509	0.555699	4.59044	4.42315e-06	6.01603e-05	TRUE	UP	YPL003W_mRNA
GLR1	47.5319	2.62508	0.40498	6.482	9.0514e-11	3.90275e-09	TRUE	UP	YPL091W		NA.96	6.1308	2.54601	0.950621	2.67826	0.00740068	0.0325391	TRUE	UP	YOR289W_mRNA
LDS2	12.2449	2.61618	0.678546	3.85557	0.000115462	0.0010944	TRUE	UP	YOL047C		NA.24	22.0529	2.54189	0.578399	4.39471	1.10921e-05	0.000132317	TRUE	UP	YJR115W_mRNA
UIP4	7.23534	2.60642	0.89118	2.92468	0.00344809	0.0191468	TRUE	UP	YPL186C		PTR2	16.3307	2.53943	0.608728	4.1717	3.02341e-05	0.000310593	TRUE	UP	YKR093W_mRNA
PRC1	216.797	2.6041	0.265415	9.81142	1.00545e-22	2.45666e-20	TRUE	UP	YMR297W		YPC1	7.39197	2.51637	0.846751	2.9718	0.00296061	0.0154064	TRUE	UP	YBR183W_mRNA
HSP26	69.9981	2.59361	0.340997	7.60597	2.82769e-14	2.30299e-12	TRUE	UP	YBR072W		TPS2	29.423	2.51471	0.470256	5.34753	8.91633e-08	1.90827e-06	TRUE	UP	YDR074W_mRNA
ULA1	20.6806	2.58663	0.531533	4.86635	1.1368e-06	1.84489e-05	TRUE	UP	YPL003W		NA.55	10.299	2.49945	0.736716	3.39269	0.0006921	0.00458453	TRUE	UP	YPL247C_mRNA
YET3	144.222	2.56862	0.289918	8.85984	8.01311e-19	1.17472e-16	TRUE	UP	YDL072C		YET3	133.459	2.49567	0.31487	7.92605	2.2622e-15	2.35161e-13	TRUE	UP	YDL072C_mRNA
ARG82	17.6548	2.5678	0.566124	4.53576	5.73963e-06	7.79102e-05	TRUE	UP	YDR173C		ALT2	17.5001	2.48319	0.587532	4.22647	2.37381e-05	0.000254021	TRUE	UP	YDR111C_mRNA
NA.13	56.6515	2.56349	0.401885	6.37867	1.78627e-10	7.41135e-09	TRUE	UP	YKL103C		NA.25	17.5347	2.48078	0.577556	4.29531	1.7445e-05	0.000197318	TRUE	UP	YNL165W_mRNA
ATG26	13.829	2.55733	0.647523	3.9494	7.83465e-05	0.000783109	TRUE	UP	YLR189C		NA.50	11.5106	2.47747	0.70452	3.51653	0.000437231	0.00311411	TRUE	UP	YNL195C_mRNA
UGO1	6.73385	2.55632	0.867997	2.94508	0.00322875	0.0183193	TRUE	UP	YDR470C		ERG7	8.53459	2.47356	0.79742	3.10195	0.0019225	0.0109721	TRUE	UP	YHR072W_mRNA
DAK1	20.3368	2.5435	0.567421	4.48256	7.37538e-06	9.82086e-05	TRUE	UP	YML070W		RPT1	108.67	2.47271	0.32459	7.61795	2.57735e-14	2.28834e-12	TRUE	UP	YKL145W_mRNA
RPN11	149.989	2.52606	0.282232	8.9503	3.5452e-19	5.56849e-17	TRUE	UP	YFR004W		OM45	51.5812	2.4616	0.387226	6.35702	2.05706e-10	8.63571e-09	TRUE	UP	YIL136W_mRNA
GPX1	10.1526	2.51602	0.758243	3.31823	0.000905914	0.00637736	TRUE	UP	YKL026C		NBP35	11.3127	2.43754	0.682848	3.56966	0.000357445	0.00258806	TRUE	UP	YGL091C_mRNA
NA.8	68.9203	2.51492	0.365316	6.88423	5.81022e-12	3.07872e-10	TRUE	UP	YJR015W		MDG1	55.5251	2.43708	0.394354	6.17995	6.41237e-10	2.33303e-08	TRUE	UP	YNL173C_mRNA
MDG1	60.9154	2.49254	0.365805	6.81386	9.50113e-12	4.7484e-10	TRUE	UP	YNL173C		APE4	22.0777	2.43209	0.541533	4.49112	7.08499e-06	8.91443e-05	TRUE	UP	YHR113W_mRNA
SSA4	17.7217	2.47323	0.558641	4.42722	9.54566e-06	0.000121335	TRUE	UP	YER103W		SIP2	10.8446	2.42735	0.764483	3.17515	0.00149761	0.00900627	TRUE	UP	YGL208W_mRNA
NA.52	20.9113	2.47291	0.589654	4.19382	2.74291e-05	0.00031091	TRUE	UP	YJR085C		NAS2	35.2907	2.41543	0.456758	5.28821	1.23522e-07	2.56808e-06	TRUE	UP	YIL007C_mRNA
KIP1	8.64453	2.4586	0.786632	3.12548	0.00177515	0.0112983	TRUE	UP	YBL063W		NA.10	63.6961	2.40656	0.382922	6.28472	3.28437e-10	1.32774e-08	TRUE	UP	YJR015W_mRNA
TPS1	136.929	2.45422	0.291423	8.42151	3.71672e-17	4.30161e-15	TRUE	UP	YBR126C		APC9	8.30412	2.40147	0.783872	3.0636	0.00218693	0.0121169	TRUE	UP	YLR102C_mRNA
MRK1	11.5181	2.44719	0.670035	3.65234	0.000259866	0.0021728	TRUE	UP	YDL079C		PDE1	35.8998	2.39855	0.44993	5.33094	9.77065e-08	2.07081e-06	TRUE	UP	YGL248W_mRNA
NA.35	22.6883	2.44706	0.503565	4.85948	1.17695e-06	1.89606e-05	TRUE	UP	YBL086C		RPN11	139.768	2.39631	0.29884	8.01871	1.06864e-15	1.13797e-13	TRUE	UP	YFR004W_mRNA
NA.38	21.4906	2.4248	0.522757	4.63849	3.50962e-06	5.04421e-05	TRUE	UP	YLR297W		PRC1	201.929	2.39559	0.286699	8.35577	6.50066e-17	8.10911e-15	TRUE	UP	YMR297W_mRNA
SAC6	79.9448	2.42409	0.343741	7.0521	1.76243e-12	1.00385e-10	TRUE	UP	YDR129C		NA.21	22.9903	2.38919	0.526747	4.53575	5.73997e-06	7.45854e-05	TRUE	UP	YNR040W_mRNA
MSN4	27.5762	2.40795	0.469442	5.12939	2.90681e-07	5.48727e-06	TRUE	UP	YKL062W		OPY2	14.8194	2.38705	0.613614	3.89016	0.00010018	0.000880053	TRUE	UP	YPR075C_mRNA
ZPS1	59.7319	2.3923	0.405699	5.89673	3.70775e-09	1.1246e-07	TRUE	UP	YOL154W		MCY1	16.3572	2.38223	0.589566	4.04066	5.33021e-05	0.000503717	TRUE	UP	YGR012W_mRNA
ARC35	82.8826	2.39139	0.319504	7.4847	7.17106e-14	5.25639e-12	TRUE	UP	YNR035C		SOL1	14.9054	2.37775	0.601636	3.95214	7.74547e-05	0.000698692	TRUE	UP	YNR034W_mRNA
ORC6	6.20327	2.37802	0.887239	2.68025	0.00735682	0.0349409	TRUE	UP	YHR118C		YJU3	47.4637	2.36963	0.436106	5.43361	5.52242e-08	1.25578e-06	TRUE	UP	YKL094W_mRNA
INH1	213.967	2.37103	0.255559	9.27781	1.73003e-20	3.04346e-18	TRUE	UP	YDL181W		NDI1	39.9914	2.36858	0.444011	5.33451	9.58055e-08	2.04042e-06	TRUE	UP	YML120C_mRNA
RAD59	8.62003	2.36344	0.762221	3.10073	0.00193042	0.0120596	TRUE	UP	YDL059C		FMP25	12.3644	2.36696	0.675483	3.50409	0.000458164	0.00324205	TRUE	UP	YLR077W_mRNA
NA.49	18.4452	2.36021	0.559945	4.21507	2.49704e-05	0.000289763	TRUE	UP	YNL165W		LSC2	68.6609	2.36648	0.420135	5.63267	1.77439e-08	4.45229e-07	TRUE	UP	YGR244C_mRNA
EAF3	29.3213	2.35512	0.473803	4.97067	6.6723e-07	1.133e-05	TRUE	UP	YPR023C		GPX1	9.40298	2.36252	0.766793	3.08104	0.00206276	0.0115568	TRUE	UP	YKL026C_mRNA
PYK2	9.43535	2.35336	0.72204	3.25932	0.00111678	0.00759133	TRUE	UP	YOR347C		HSP26	65.3895	2.3527	0.35556	6.61687	3.66874e-11	1.88444e-09	TRUE	UP	YBR072W_mRNA
RSF1	5.86575	2.34468	0.906554	2.58637	0.00969939	0.0436766	TRUE	UP	YMR030W		PNS1	38.4797	2.35249	0.452554	5.19824	2.01183e-07	3.93886e-06	TRUE	UP	YOR161C_mRNA
MDH1	106.119	2.33689	0.348976	6.69643	2.13576e-11	1.00565e-09	TRUE	UP	YKL085W		CDC19	698.273	2.34315	0.340303	6.88549	5.75879e-12	3.22452e-10	TRUE	UP	YAL038W_mRNA
RIE1	23.2371	2.33534	0.507029	4.60592	4.10645e-06	5.80713e-05	TRUE	UP	YGR250C		YSC84	7.88036	2.32627	0.79819	2.91443	0.00356343	0.0178212	TRUE	UP	YHR016C_mRNA
GAC1	9.30662	2.33214	0.730717	3.19157	0.00141501	0.00927526	TRUE	UP	YOR178C		LAM4	10.6578	2.32566	0.693796	3.35208	0.000802082	0.0052267	TRUE	UP	YHR080C_mRNA
VHS1	6.99199	2.32448	0.826492	2.81246	0.00491636	0.0253781	TRUE	UP	YDR247W		NA.4	350.961	2.32525	0.318368	7.30364	2.80087e-13	2.00469e-11	TRUE	UP	YLR154W-F_mRNA
MCY1	17.6223	2.3156	0.551846	4.19609	2.71561e-05	0.000308612	TRUE	UP	YGR012W		STP4	15.5054	2.31727	0.633276	3.65918	0.000253022	0.00191455	TRUE	UP	YDL048C_mRNA
PTR2	18.5829	2.30724	0.548524	4.20628	2.59611e-05	0.000300465	TRUE	UP	YKR093W		RPT2	44.8995	2.31173	0.426826	5.41608	6.09187e-08	1.37809e-06	TRUE	UP	YDL007W_mRNA
BDH2	45.7535	2.30704	0.380512	6.06299	1.33613e-09	4.70104e-08	TRUE	UP	YAL061W		SBH2	203.373	2.30781	0.308841	7.4725	7.86864e-14	6.13473e-12	TRUE	UP	YER019C-A_mRNA
TPO2	10.2768	2.29954	0.693286	3.31687	0.000910328	0.00639556	TRUE	UP	YGR138C		RNA15	15.8698	2.30011	0.597064	3.85237	0.000116979	0.000999924	TRUE	UP	YGL044C_mRNA
MHF1	70.4671	2.29751	0.340643	6.74463	1.53418e-11	7.41463e-10	TRUE	UP	YOL086W-A		PRE7	119.9	2.2938	0.307209	7.46658	8.23053e-14	6.3043e-12	TRUE	UP	YBL041W_mRNA
RNA15	17.3817	2.29688	0.555114	4.13767	3.5085e-05	0.00038576	TRUE	UP	YGL044C		MIG2	16.6558	2.28977	0.604024	3.79085	0.000150133	0.00124854	TRUE	UP	YGL209W_mRNA
CDC4	13.8781	2.29248	0.600317	3.81878	0.000134111	0.00124173	TRUE	UP	YFL009W		GGA1	27.9145	2.28715	0.481798	4.7471	2.06352e-06	3.1948e-05	TRUE	UP	YDR358W_mRNA
GLC8	87.1278	2.29238	0.325129	7.05069	1.78037e-12	1.00385e-10	TRUE	UP	YMR311C		PAI3	11.5148	2.28186	0.676969	3.3707	0.000749779	0.00491522	TRUE	UP	YMR174C_mRNA
APE4	24.7417	2.28661	0.498978	4.58259	4.59253e-06	6.45302e-05	TRUE	UP	YHR113W		NA.8	63.8239	2.27765	0.356355	6.39151	1.64251e-10	6.96235e-09	TRUE	UP	YLR257W_mRNA
RFA2	91.8393	2.28569	0.341377	6.6955	2.1494e-11	1.00565e-09	TRUE	UP	YNL312W		AGP1	27.9385	2.27019	0.483063	4.69957	2.60706e-06	3.84541e-05	TRUE	UP	YCL025C_mRNA
PRE2	90.1716	2.27723	0.326394	6.97695	3.01649e-12	1.65832e-10	TRUE	UP	YPR103W		NA.61	11.1597	2.26201	0.692595	3.26599	0.00109081	0.00679383	TRUE	UP	YJL070C_mRNA
ZRT1	119.543	2.27568	0.300711	7.56768	3.79955e-14	2.984e-12	TRUE	UP	YGL255W		RFA2	87.9995	2.26137	0.361019	6.26386	3.75568e-10	1.47723e-08	TRUE	UP	YNL312W_mRNA
SQT1	44.3341	2.26996	0.401605	5.65222	1.58391e-08	4.24758e-07	TRUE	UP	YIR012W		APE1	53.1323	2.25917	0.399268	5.65828	1.529e-08	3.88117e-07	TRUE	UP	YKL103C_mRNA
OTU1	14.5789	2.25634	0.588916	3.83135	0.000127442	0.00119043	TRUE	UP	YFL044C		EAF3	27.4165	2.24429	0.485316	4.62439	3.75702e-06	5.24063e-05	TRUE	UP	YPR023C_mRNA
TUB4	25.5276	2.25496	0.47593	4.73801	2.15824e-06	3.26184e-05	TRUE	UP	YLR212C		RIE1	20.9446	2.23365	0.525235	4.25267	2.11239e-05	0.000229703	TRUE	UP	YGR250C_mRNA
MHP1	9.22481	2.2541	0.744202	3.02889	0.00245455	0.0148285	TRUE	UP	YJL042W		TPO2	14.8278	2.23334	0.600511	3.71907	0.000199961	0.00158158	TRUE	UP	YGR138C_mRNA
NDI1	44.6863	2.25194	0.405901	5.54801	2.88947e-08	7.05995e-07	TRUE	UP	YML120C		DCS2	8.69107	2.22395	0.741948	2.99745	0.00272248	0.0144252	TRUE	UP	YOR173W_mRNA
NA.74	13.7694	2.23973	0.615627	3.63812	0.000274631	0.00227463	TRUE	UP	YMR265C		ZRT1	109.764	2.2204	0.319797	6.94316	3.83422e-12	2.20266e-10	TRUE	UP	YGL255W_mRNA
PDR10	6.71994	2.23729	0.830519	2.69385	0.00706319	0.0338387	TRUE	UP	YOR328W		NNR2	21.7218	2.21518	0.547239	4.04792	5.16756e-05	0.000491288	TRUE	UP	YKL151C_mRNA
RPT2	49.1954	2.2362	0.393248	5.68649	1.29678e-08	3.58695e-07	TRUE	UP	YDL007W		NTH1	28.374	2.21415	0.476881	4.64299	3.43411e-06	4.86796e-05	TRUE	UP	YDR001C_mRNA
NA.85	12.2559	2.23531	0.661335	3.38	0.000724868	0.00526067	TRUE	UP	YJL070C		GAL83	18.0677	2.21102	0.584148	3.78503	0.000153692	0.00126846	TRUE	UP	YER027C_mRNA
LAM4	11.0512	2.22882	0.661554	3.36907	0.000754224	0.00544676	TRUE	UP	YHR080C		BCH1	26.8387	2.20124	0.497366	4.42579	9.60899e-06	0.000116761	TRUE	UP	YMR237W_mRNA
PRE7	102.241	2.22808	0.295089	7.55055	4.33412e-14	3.23075e-12	TRUE	UP	YBL041W		NA.93	7.36057	2.19908	0.80635	2.7272	0.00638749	0.0287799	TRUE	UP	YNL144C_mRNA
GUT2	9.78705	2.22796	0.730022	3.05191	0.00227389	0.013909	TRUE	UP	YIL155C		GLR1	45.6878	2.19422	0.413865	5.30176	1.14691e-07	2.4074e-06	TRUE	UP	YPL091W_mRNA
PDR15	13.9822	2.22274	0.606542	3.66461	0.000247713	0.00207909	TRUE	UP	YDR406W		MHF1	72.2161	2.19094	0.375463	5.8353	5.3695e-09	1.54232e-07	TRUE	UP	YOL086W-A_mRNA
ERG10	170.24	2.2151	0.278792	7.94535	1.93638e-15	1.85135e-13	TRUE	UP	YPL028W		HRB1	29.4488	2.19024	0.478318	4.57905	4.67089e-06	6.25555e-05	TRUE	UP	YNL004W_mRNA
TIM11	202.731	2.21106	0.270191	8.18333	2.76115e-16	2.82408e-14	TRUE	UP	YDR322C-A		IMP2	15.961	2.18943	0.586233	3.73475	0.000187904	0.00150254	TRUE	UP	YMR035W_mRNA
GNA1	9.04863	2.20945	0.740577	2.98342	0.00285043	0.0167149	TRUE	UP	YFL017C		RFS1	73.3606	2.18763	0.378995	5.77219	7.82464e-09	2.16218e-07	TRUE	UP	YBR052C_mRNA
DDP1	48.6284	2.20792	0.372002	5.93525	2.93404e-09	9.21708e-08	TRUE	UP	YOR163W		NA.67	9.64493	2.18744	0.7112	3.0757	0.00210006	0.011695	TRUE	UP	YJL225C_mRNA
PRP40	30.7928	2.20333	0.44866	4.9109	9.06589e-07	1.48775e-05	TRUE	UP	YKL012W		GPD1	35.4269	2.17445	0.45857	4.7418	2.11823e-06	3.247e-05	TRUE	UP	YDL022W_mRNA
NTH1	30.8116	2.19268	0.450485	4.86737	1.13092e-06	1.84215e-05	TRUE	UP	YDR001C		DAK1	19.1144	2.16703	0.560847	3.86386	0.000111609	0.000957341	TRUE	UP	YML070W_mRNA
TIM17	49.3378	2.19244	0.39053	5.614	1.97698e-08	5.14482e-07	TRUE	UP	YJL143W		GLC8	81.65	2.16471	0.349614	6.1917	5.95179e-10	2.20216e-08	TRUE	UP	YMR311C_mRNA
GLK1	44.016	2.19037	0.379393	5.77337	7.77027e-09	2.21907e-07	TRUE	UP	YCL040W		MTH1	13.2912	2.15907	0.626117	3.44834	0.000564034	0.00383578	TRUE	UP	YDR277C_mRNA
STE50	13.1514	2.18682	0.629423	3.47432	0.00051215	0.00387683	TRUE	UP	YCL032W		MDH1	99.5669	2.15688	0.35386	6.09531	1.09228e-09	3.84589e-08	TRUE	UP	YKL085W_mRNA
YIF1	48.7489	2.17895	0.402653	5.41149	6.25014e-08	1.43167e-06	TRUE	UP	YNL263C		HEM12	43.851	2.15317	0.412614	5.21836	1.80519e-07	3.58248e-06	TRUE	UP	YDR047W_mRNA
NTH2	21.9284	2.16759	0.503139	4.30814	1.64632e-05	0.000199463	TRUE	UP	YBR001C		MRK1	10.7154	2.15002	0.669256	3.21255	0.00131562	0.00799997	TRUE	UP	YDL079C_mRNA
VPS30	11.9953	2.16704	0.63156	3.43125	0.000600803	0.00446339	TRUE	UP	YPL120W		MBF1	596.595	2.1472	0.297206	7.22463	5.02483e-13	3.37514e-11	TRUE	UP	YOR298C-A_mRNA
NA.125	8.32607	2.15399	0.760425	2.83261	0.00461692	0.0241729	TRUE	UP	YOL075C		ARO10	9.70734	2.14591	0.728858	2.94421	0.00323775	0.0165029	TRUE	UP	YDR380W_mRNA
IMP2	16.9133	2.15344	0.56207	3.83126	0.000127488	0.00119043	TRUE	UP	YMR035W		ARC35	78.5784	2.13942	0.334017	6.40511	1.50257e-10	6.43158e-09	TRUE	UP	YNR035C_mRNA
NA.11	71.4374	2.152	0.32657	6.58971	4.40677e-11	2.01885e-09	TRUE	UP	YLR257W		MSN4	25.2318	2.13594	0.484489	4.40865	1.04016e-05	0.000125106	TRUE	UP	YKL062W_mRNA
IML2	9.40785	2.1497	0.705625	3.04651	0.00231511	0.0141415	TRUE	UP	YJL082W		TIM11	185.161	2.13378	0.298293	7.15329	8.47231e-13	5.36089e-11	TRUE	UP	YDR322C-A_mRNA
STP4	17.4996	2.13503	0.567214	3.76407	0.000167171	0.00149377	TRUE	UP	YDL048C		SAC6	76.196	2.13138	0.343527	6.20442	5.49002e-10	2.06633e-08	TRUE	UP	YDR129C_mRNA
KTR1	121.77	2.13248	0.282165	7.55757	4.10665e-14	3.11398e-12	TRUE	UP	YOR099W		HPF1	51.3112	2.13044	0.388945	5.47749	4.31398e-08	1.00721e-06	TRUE	UP	YOL155C_mRNA
FUM1	50.885	2.13045	0.366043	5.8202	5.87764e-09	1.72332e-07	TRUE	UP	YPL262W		FUM1	46.8959	2.11615	0.391155	5.40999	6.3027e-08	1.41843e-06	TRUE	UP	YPL262W_mRNA
NA.105	9.66837	2.11591	0.696332	3.03865	0.0023764	0.0144526	TRUE	UP	YPR011C		ARO80	9.42342	2.11504	0.704428	3.0025	0.00267774	0.0142748	TRUE	UP	YDR421W_mRNA
NA.92	11.4751	2.10536	0.643131	3.27361	0.00106183	0.00726274	TRUE	UP	YMR196W		LCL1	7.33172	2.11475	0.828627	2.55211	0.0107073	0.0436083	TRUE	UP	YPL056C_mRNA
FMP25	7.38485	2.09513	0.788448	2.65728	0.00787729	0.0366995	TRUE	UP	YLR077W		PST2	259.804	2.10741	0.393746	5.3522	8.68892e-08	1.86876e-06	TRUE	UP	YDR032C_mRNA
RMR1	22.0389	2.0877	0.533905	3.91024	9.22043e-05	0.000899146	TRUE	UP	YGL250W		MAM3	7.13114	2.10686	0.810805	2.59847	0.0093639	0.0390476	TRUE	UP	YOL060C_mRNA
HEM12	48.5708	2.08472	0.375224	5.55592	2.76156e-08	6.7851e-07	TRUE	UP	YDR047W		SQT1	41.5292	2.10512	0.409624	5.13914	2.76004e-07	5.14971e-06	TRUE	UP	YIR012W_mRNA
LSC2	77.6662	2.08201	0.396941	5.24513	1.56176e-07	3.1947e-06	TRUE	UP	YGR244C		ERG10	157.328	2.10415	0.297355	7.07625	1.48112e-12	9.23795e-11	TRUE	UP	YPL028W_mRNA
CIT1	49.3591	2.07734	0.362247	5.73461	9.77373e-09	2.72056e-07	TRUE	UP	YNR001C		PEX2	22.7802	2.09806	0.518357	4.04753	5.17619e-05	0.000491288	TRUE	UP	YJL210W_mRNA
UGA2	28.8778	2.07407	0.443063	4.68121	2.8519e-06	4.18089e-05	TRUE	UP	YBR006W		VPS36	8.00229	2.09173	0.761036	2.74853	0.0059864	0.0273564	TRUE	UP	YLR417W_mRNA
PNC1	104.693	2.07349	0.298276	6.95158	3.61211e-12	1.96124e-10	TRUE	UP	YGL037C		TUB4	24.3138	2.08974	0.483884	4.31867	1.56971e-05	0.000178939	TRUE	UP	YLR212C_mRNA
NAS2	29.2711	2.07282	0.456344	4.54222	5.56653e-06	7.62666e-05	TRUE	UP	YIL007C		OSH2	10.2421	2.0862	0.69511	3.00125	0.00268878	0.0143161	TRUE	UP	YDL019C_mRNA
HAM1	12.0552	2.07215	0.622005	3.33141	0.000864073	0.00613924	TRUE	UP	YJR069C		PRB1	19.2595	2.08028	0.543844	3.82514	0.000130699	0.00110374	TRUE	UP	YEL060C_mRNA
OSH2	11.183	2.066	0.665387	3.10496	0.00190307	0.0119057	TRUE	UP	YDL019C		FMP40	7.86523	2.06336	0.760931	2.71162	0.00669547	0.02989	TRUE	UP	YPL222W_mRNA
UBI4	40.3878	2.06175	0.392583	5.25177	1.50648e-07	3.09603e-06	TRUE	UP	YLL039C		CKA2	25.7083	2.062	0.48222	4.27604	1.90243e-05	0.000210278	TRUE	UP	YOR061W_mRNA
AGP1	31.9384	2.06018	0.439395	4.68866	2.74996e-06	4.04492e-05	TRUE	UP	YCL025C		NA.32	21.4098	2.06083	0.497666	4.14098	3.45822e-05	0.000350315	TRUE	UP	YBL086C_mRNA
RUD3	18.5202	2.05989	0.550283	3.74333	0.000181595	0.00159412	TRUE	UP	YOR216C		RAD59	11.5164	2.05006	0.658458	3.11342	0.00184931	0.0106851	TRUE	UP	YDL059C_mRNA
NA.51	23.451	2.05152	0.488503	4.1996	2.67391e-05	0.000305487	TRUE	UP	YGR201C		KTR1	111.644	2.04442	0.316335	6.46282	1.02766e-10	4.72292e-09	TRUE	UP	YOR099W_mRNA
NA.134	8.03229	2.05011	0.747479	2.74269	0.00609374	0.0299444	TRUE	UP	YML020W		NA.36	22.3018	2.038	0.503697	4.04608	5.20819e-05	0.000493252	TRUE	UP	YIR016W_mRNA
NA.45	24.1977	2.04429	0.465924	4.3876	1.14606e-05	0.000143193	TRUE	UP	YNL115C		PML1	22.2312	2.03349	0.491476	4.13753	3.51065e-05	0.000351917	TRUE	UP	YLR016C_mRNA
CPS1	42.3601	2.02606	0.48631	4.1662	3.09723e-05	0.000346606	TRUE	UP	YJL172W		CDC4	14.447	2.02552	0.585948	3.45683	0.000546566	0.00374651	TRUE	UP	YFL009W_mRNA
YAP1801	12.208	2.02545	0.632758	3.20099	0.00136955	0.00907119	TRUE	UP	YHR161C		YAP1801	11.4327	2.02252	0.670329	3.0172	0.00255121	0.0137344	TRUE	UP	YHR161C_mRNA
SBH2	79.7756	2.0237	0.334407	6.05162	1.43398e-09	4.94299e-08	TRUE	UP	YER019C-A		INH1	201.859	2.01982	0.276746	7.29846	2.91073e-13	2.04972e-11	TRUE	UP	YDL181W_mRNA
NA.103	11.0064	2.02249	0.647961	3.12132	0.00180045	0.0114098	TRUE	UP	YBR056W		UGA2	26.5096	2.01445	0.465081	4.33139	1.48169e-05	0.000170688	TRUE	UP	YBR006W_mRNA
ASI2	21.5704	2.01268	0.482271	4.17334	3.00167e-05	0.000337631	TRUE	UP	YNL159C		FMP45	9.81062	2.01403	0.687831	2.92809	0.00341055	0.0171747	TRUE	UP	YDL222C_mRNA
NA.55	27.6063	2.01018	0.488043	4.11886	3.80752e-05	0.000414492	TRUE	UP	YEL047C		ZPS1	57.662	2.01199	0.427628	4.705	2.53872e-06	3.78295e-05	TRUE	UP	YOL154W_mRNA
MGR2	55.2837	2.0016	0.392511	5.09948	3.40589e-07	6.3203e-06	TRUE	UP	YPL098C		NTH2	19.4955	2.00978	0.548414	3.66471	0.00024762	0.00189336	TRUE	UP	YBR001C_mRNA
BCH1	30.2756	1.99805	0.457042	4.37169	1.23291e-05	0.000153173	TRUE	UP	YMR237W		NA.28	32.7038	2.00893	0.478098	4.20193	2.64649e-05	0.000279772	TRUE	UP	YKL018C-A_mRNA
BTN2	8.96867	1.99427	0.724204	2.75375	0.00589175	0.029246	TRUE	UP	YGR142W		CHS3	20.6478	2.00065	0.521757	3.83444	0.00012585	0.00106899	TRUE	UP	YBR023C_mRNA
YRB1	827.699	1.98216	0.253886	7.80727	5.84419e-15	5.14055e-13	TRUE	UP	YDR002W		DLD1	55.1906	1.99879	0.371312	5.38306	7.32307e-08	1.62297e-06	TRUE	UP	YDL174C_mRNA
[truncated: 896 more rows]

## Sheet: Rkr1Δ_jlp2Δ_pEV_vs_wt_pEV
Differentially expressed genes (left) and transcripts (right) in rkr1Δjlp2Δ-pEV(URA3) vs WT-pEV(HIS3), per each time point. Data was collected 1-hour, 2-hours, 5hours, 10-hours and 24-hours post-sequencing initiation. The same time points for DEGs and DETs are shown in the same row.
Differential Gene expression											Differential Transcript expression
1 hour post-sequencing initiation											1 hour post-sequencing initiation
gene name	gene base mean	log 2 fold change	lfcSE	stat	p-value	p-adjusted	significance	significance_reg	gene ID		transcript name	transcript base mean	log 2 fold change	lfcSE	stat	p-value	p-adjusted	significance	significance_reg	gene ID
KanR	30.1151	8.17929	1.72853	4.73192	2.22401e-06	6.33258e-05	TRUE	UP	KanR		KanR	29.7352	8.15167	1.3699	5.95055	2.6724e-09	2.7499e-07	TRUE	UP	KanR
HygR	24.7084	7.89328	1.25105	6.30933	2.80245e-10	3.79031e-08	TRUE	UP	HygR		HygR	24.4276	7.86585	1.24672	6.30925	2.80399e-10	4.80885e-08	TRUE	UP	HygR
URA3	32.7568	6.43142	1.10254	5.83329	5.43458e-09	4.20016e-07	TRUE	UP	YEL021W		URA3	32.1749	6.39302	1.10074	5.80791	6.32563e-09	5.91734e-07	TRUE	UP	YEL021W_mRNA
SQT1	4.82573	5.52973	1.48278	3.72929	0.000192019	0.00244343	TRUE	UP	YIR012W		RPT1	6.32163	5.91687	1.39358	4.24579	2.17826e-05	0.000605792	TRUE	UP	YKL145W_mRNA
SAC6	4.53599	5.44689	1.46672	3.71366	0.000204283	0.00244343	TRUE	UP	YDR129C		SQT1	4.71019	5.48395	1.47528	3.71724	0.000201414	0.00370098	TRUE	UP	YIR012W_mRNA
HSP42	6.48673	4.95594	1.3852	3.57777	0.000346535	0.00390574	TRUE	UP	YDR171W		SAC6	4.4351	5.40342	1.4536	3.71727	0.000201389	0.00370098	TRUE	UP	YDR129C_mRNA
HSP26	6.25085	4.91357	1.40537	3.49629	0.000471783	0.0051047	TRUE	UP	YBR072W		RME1	3.93364	5.23543	1.50843	3.47079	0.000518932	0.00796987	TRUE	UP	YGR044C_mRNA
SUP35	5.97185	4.83071	1.40926	3.42784	0.000608396	0.00598441	TRUE	UP	YDR172W		HSP26	6.52024	4.9646	1.39302	3.56392	0.000365363	0.0059676	TRUE	UP	YBR072W_mRNA
RFA2	5.79413	4.79092	1.4134	3.38964	0.000699848	0.0065279	TRUE	UP	YNL312W		HSP42	6.34061	4.91167	1.37489	3.57242	0.000353697	0.00587023	TRUE	UP	YDR171W_mRNA
GLR1	4.06199	4.26883	1.49557	2.85432	0.00431284	0.0267609	TRUE	UP	YPL091W		SUP35	5.83049	4.78484	1.39953	3.41889	0.000628767	0.00937682	TRUE	UP	YDR172W_mRNA
COX5A	7.31043	4.21744	1.22902	3.43154	0.000600166	0.00598441	TRUE	UP	YNL052W		RFA2	5.80142	4.78137	1.39592	3.42526	0.000614213	0.00929449	TRUE	UP	YNL312W_mRNA
SEC62	7.02473	4.12238	1.24597	3.30858	0.000937692	0.00792643	TRUE	UP	YPL094C		APS2	2.73801	4.7106	1.60222	2.94004	0.0032817	0.0321607	TRUE	UP	YJR058C_mRNA
ZRT1	6.39901	4.0096	1.28948	3.10947	0.00187423	0.0137021	TRUE	UP	YGL255W		YAP1	2.72743	4.70606	1.61206	2.91927	0.00350847	0.0337403	TRUE	UP	YML007W_mRNA
ZPS1	6.22935	3.94466	1.27513	3.09353	0.00197789	0.0140801	TRUE	UP	YOL154W		CRH1	2.60053	4.62432	1.67461	2.76143	0.00575496	0.0475584	TRUE	UP	YGR189C_mRNA
ALD6	14.7673	3.86129	0.8275	4.66621	3.06807e-06	8.29912e-05	TRUE	UP	YPL061W		EFM4	5.19183	4.61865	1.43868	3.21034	0.00132577	0.0160496	TRUE	UP	YIL064W_mRNA
ARC15	10.1964	3.63547	0.970062	3.74767	0.000178483	0.00235511	TRUE	UP	YIL062C		HAM1	5.09927	4.58025	1.42357	3.21745	0.00129334	0.0160299	TRUE	UP	YJR069C_mRNA
RPN11	7.50507	3.61486	1.11907	3.23025	0.00123683	0.0099522	TRUE	UP	YFR004W		GLR1	3.97877	4.22571	1.48275	2.84991	0.0043731	0.0384609	TRUE	UP	YPL091W_mRNA
PDC1	11.289	3.44169	0.857028	4.01585	5.9232e-05	0.000971046	TRUE	UP	YLR044C		COX5A	7.02986	4.14758	1.22052	3.39821	0.000678278	0.00969373	TRUE	UP	YNL052W_mRNA
NA.1	15.3335	3.41796	0.736723	4.63941	3.49407e-06	9.00138e-05	TRUE	UP	YDR133C		RPN2	3.77332	4.1409	1.49719	2.76579	0.00567851	0.0475056	TRUE	UP	YIL075C_mRNA
SED1	22.7671	3.1941	0.601076	5.31398	1.07256e-07	5.80255e-06	TRUE	UP	YDR077W		PRY2	3.70146	4.09439	1.48339	2.76016	0.00577726	0.0475584	TRUE	UP	YKR013W_mRNA
MIA40	5.56697	3.1305	1.13694	2.75344	0.00589726	0.0329921	TRUE	UP	YKL195W		SEC62	6.86514	4.07799	1.23716	3.29624	0.000979888	0.0132672	TRUE	UP	YPL094C_mRNA
AHA1	5.06135	3.02949	1.15945	2.61288	0.00897832	0.047158	TRUE	UP	YDR214W		ZPS1	6.11541	3.90621	1.26795	3.08074	0.00206487	0.0241449	TRUE	UP	YOL154W_mRNA
PUP3	6.56544	2.99682	1.03764	2.8881	0.00387573	0.0249616	TRUE	UP	YER094C		ALD6	14.4511	3.81478	0.820684	4.64829	3.34696e-06	0.000131022	TRUE	UP	YPL061W_mRNA
IDH1	6.66914	2.99127	1.05801	2.82724	0.00469504	0.027312	TRUE	UP	YNL037C		CDC19	53.8029	3.80826	0.462882	8.22727	1.91528e-16	9.85411e-14	TRUE	UP	YAL038W_mRNA
KTR1	8.31961	2.97096	0.894013	3.32318	0.00088999	0.00774882	TRUE	UP	YOR099W		ARC15	9.99789	3.59928	0.966146	3.7254	0.000195006	0.00370098	TRUE	UP	YIL062C_mRNA
PRE2	6.32401	2.90618	1.0243	2.83722	0.00455083	0.0267609	TRUE	UP	YPR103W		RPN11	7.3494	3.58084	1.1141	3.2141	0.00130856	0.0160299	TRUE	UP	YFR004W_mRNA
PGI1	35.8592	2.7318	0.54281	5.0327	4.83615e-07	2.1803e-05	TRUE	UP	YBR196C		ZRT1	6.60788	3.41511	1.12127	3.04575	0.00232101	0.0253378	TRUE	UP	YGL255W_mRNA
KRE2	10.6425	2.5762	0.776122	3.31932	0.000902358	0.00774882	TRUE	UP	YDR483W		NA.2	15.0396	3.3746	0.728079	4.63494	3.57042e-06	0.000131022	TRUE	UP	YDR133C_mRNA
RPL2B	221.675	2.56517	0.430369	5.9604	2.51623e-09	2.72256e-07	TRUE	UP	YIL018W		PRE2	6.03124	3.26726	1.097	2.97836	0.00289795	0.0292352	TRUE	UP	YPR103W_mRNA
SGT2	8.80986	2.53479	0.858568	2.95234	0.0031537	0.0208068	TRUE	UP	YOR007C		SED1	22.3155	3.15154	0.59287	5.31573	1.06229e-07	7.28728e-06	TRUE	UP	YDR077W_mRNA
RPL3	11.1269	2.48401	0.740548	3.35428	0.000795717	0.0070571	TRUE	UP	YOR063W		IDH1	7.25344	3.12098	1.01544	3.07351	0.00211556	0.0241811	TRUE	UP	YNL037C_mRNA
NA.3	10.0743	2.47975	0.802601	3.08964	0.002004	0.0140801	TRUE	UP	snR30		PUP3	6.44281	2.95247	1.02507	2.88025	0.00397358	0.0361841	TRUE	UP	YER094C_mRNA
RPL15A	92.7077	2.37367	0.373818	6.34979	2.15605e-10	3.79031e-08	TRUE	UP	YLR029C		KTR1	8.16446	2.9256	0.879372	3.32692	0.000878116	0.0123778	TRUE	UP	YOR099W_mRNA
CIT2	17.1549	2.31401	0.687903	3.36386	0.000768604	0.00704771	TRUE	UP	YCR005C		RPL10	168.094	2.90406	0.273954	10.6005	2.96351e-26	3.04945e-23	TRUE	UP	YLR075W_mRNA
KRS1	18.0955	2.24028	0.581793	3.85065	0.000117805	0.00163417	TRUE	UP	YDR037W		NA.1	20.744	2.77705	0.586808	4.73248	2.21797e-06	9.12916e-05	TRUE	UP	YLR154W-F_mRNA
SIS1	9.59473	2.23043	0.777826	2.86752	0.00413704	0.0260249	TRUE	UP	YNL007C		SBH2	14.7716	2.73638	0.684628	3.99689	6.41807e-05	0.0014676	TRUE	UP	YER019C-A_mRNA
ADH3	8.43438	2.1848	0.80811	2.70359	0.00685951	0.0378673	TRUE	UP	YMR083W		PGI1	35.2517	2.69152	0.54637	4.92617	8.38553e-07	4.31436e-05	TRUE	UP	YBR196C_mRNA
TPI1	123.913	2.13896	0.280476	7.62618	2.41815e-14	1.30822e-11	TRUE	UP	YDR050C		KRE2	10.4595	2.53491	0.765178	3.31284	0.000923548	0.0126711	TRUE	UP	YDR483W_mRNA
RPL18B	13.026	2.096	0.680523	3.07999	0.00207011	0.0143581	TRUE	UP	YNL301C		RPL2B	218.216	2.51549	0.447024	5.62719	1.83165e-08	1.34626e-06	TRUE	UP	YIL018W_mRNA
TDH1	11.7264	2.07802	0.688917	3.01635	0.00255834	0.0173008	TRUE	UP	YJL052W		SGT2	8.64179	2.49573	0.847025	2.94647	0.00321429	0.0318029	TRUE	UP	YOR007C_mRNA
YRB1	38.4385	2.05904	0.421487	4.88518	1.03333e-06	3.72689e-05	TRUE	UP	YDR002W		RPL3	11.0665	2.46462	0.723783	3.40519	0.000661177	0.00969373	TRUE	UP	YOR063W_mRNA
ERG2	14.8426	1.99581	0.60982	3.27278	0.00106494	0.00872929	TRUE	UP	YMR202W		EXG1	7.36994	2.44356	0.863041	2.83134	0.00463541	0.0399864	TRUE	UP	YLR300W_mRNA
EFT1	16.584	1.98125	0.577466	3.43093	0.000601515	0.00598441	TRUE	UP	YOR133W		RPL15A	91.1408	2.35473	0.377662	6.23503	4.51698e-10	6.63996e-08	TRUE	UP	YLR029C_mRNA
YEF3	35.7452	1.97161	0.432696	4.55658	5.19933e-06	0.000127856	TRUE	UP	YLR249W		KRS1	17.8817	2.30852	0.57441	4.01894	5.84606e-05	0.00139898	TRUE	UP	YDR037W_mRNA
TPM1	30.2472	1.91713	0.481417	3.98227	6.82615e-05	0.00102582	TRUE	UP	YNL079C		CIT2	17.0179	2.27702	0.692138	3.28984	0.00100244	0.0133639	TRUE	UP	YCR005C_mRNA
PDA1	11.5909	1.85721	0.705318	2.63315	0.0084596	0.044869	TRUE	UP	YER178W		MBF1	40.5828	2.25718	0.467203	4.83127	1.35667e-06	6.06962e-05	TRUE	UP	YOR298C-A_mRNA
SDD2	13.6564	1.85402	0.650507	2.85011	0.00437046	0.0267609	TRUE	UP	YMR074C		SIS1	9.58008	2.21128	0.758535	2.9152	0.00355462	0.0338676	TRUE	UP	YNL007C_mRNA
TEF2	124.176	1.85397	0.328786	5.63883	1.7121e-08	1.15781e-06	TRUE	UP	YBR118W		TPI1	122.335	2.07493	0.268543	7.72664	1.10419e-14	3.78736e-12	TRUE	UP	YDR050C_mRNA
SAH1	28.4559	1.79975	0.456822	3.93973	8.15735e-05	0.00119274	TRUE	UP	YER043C		RPL18B	12.7923	2.0541	0.670177	3.06501	0.00217666	0.0241811	TRUE	UP	YNL301C_mRNA
EFT2	37.1919	1.67519	0.418189	4.00582	6.18026e-05	0.000983388	TRUE	UP	YDR385W		TDH1	11.5524	2.03498	0.677809	3.0023	0.00267951	0.0275721	TRUE	UP	YJL052W_mRNA
CCW12	210.512	1.65118	0.407669	4.05029	5.11542e-05	0.000864826	TRUE	UP	YLR110C		YRB1	37.7717	2.01649	0.416342	4.84336	1.27663e-06	5.97116e-05	TRUE	UP	YDR002W_mRNA
TEF1	117.528	1.58112	0.303542	5.20891	1.89948e-07	9.34201e-06	TRUE	UP	YPR080W		ERG2	14.6098	1.95095	0.59768	3.2642	0.00109774	0.0141197	TRUE	UP	YMR202W_mRNA
EGD1	45.3859	1.57039	0.375968	4.17693	2.95468e-05	0.000586513	TRUE	UP	YPL037C		YEF3	35.017	1.91782	0.414397	4.62798	3.69254e-06	0.000131022	TRUE	UP	YLR249W_mRNA
ACT1	43.8595	1.56504	0.420084	3.72555	0.000194892	0.00244343	TRUE	UP	YFL039C		RPS2	106.867	1.86579	0.277799	6.71633	1.86361e-11	3.8353e-09	TRUE	UP	YGL123W_mRNA
RPL23A	77.293	1.55785	0.312412	4.98652	6.14763e-07	2.55836e-05	TRUE	UP	YBL087C		TPM1	30.1723	1.84847	0.477588	3.87043	0.000108642	0.00223586	TRUE	UP	YNL079C_mRNA
RPL13A	44.0469	1.54026	0.487952	3.15658	0.0015963	0.0119944	TRUE	UP	YDL082W		SDD2	13.5708	1.8325	0.639672	2.86474	0.00417348	0.0376711	TRUE	UP	YMR074C_mRNA
FPR1	46.4099	1.5139	0.367049	4.12451	3.71529e-05	0.000669991	TRUE	UP	YNL135C		EFT1	17.8503	1.82705	0.550147	3.32103	0.000896869	0.0124713	TRUE	UP	YOR133W_mRNA
RPS15	104.603	1.46619	0.330863	4.43142	9.36146e-06	0.000216311	TRUE	UP	YOL040C		SAH1	28.5323	1.7948	0.448981	3.99749	6.40184e-05	0.0014676	TRUE	UP	YER043C_mRNA
RPL5	64.6333	1.40903	0.439317	3.20732	0.00133979	0.0103547	TRUE	UP	YPL131W		TEF2	122.886	1.75341	0.3115	5.62893	1.81332e-08	1.34626e-06	TRUE	UP	YBR118W_mRNA
ZEO1	102.924	1.39423	0.343643	4.05721	4.96631e-05	0.000864826	TRUE	UP	YOL109W		EFT2	35.134	1.68225	0.411538	4.08772	4.35625e-05	0.00109331	TRUE	UP	YDR385W_mRNA
FBA1	223.666	1.37974	0.43472	3.17386	0.00150425	0.011462	TRUE	UP	YKL060C		PDC1	16.6073	1.67776	0.552296	3.03779	0.00238322	0.0255451	TRUE	UP	YLR044C_mRNA
EFB1	122.909	1.35168	0.283193	4.77299	1.81507e-06	5.45531e-05	TRUE	UP	YAL003W		RPL8B	37.8088	1.65196	0.385329	4.28714	1.8099e-05	0.000517331	TRUE	UP	YLL045C_mRNA
CWP2	196.513	1.33964	0.275781	4.85761	1.18808e-06	4.01721e-05	TRUE	UP	YKL096W-A		CCW12	208.282	1.60566	0.421946	3.80537	0.000141593	0.0028019	TRUE	UP	YLR110C_mRNA
HSC82	26.2887	1.32482	0.453528	2.92114	0.00348758	0.0227323	TRUE	UP	YMR186W		TEF1	115.44	1.58715	0.316881	5.00867	5.48081e-07	3.3175e-05	TRUE	UP	YPR080W_mRNA
RPL8A	24.2401	1.31919	0.459834	2.86883	0.00411997	0.0260249	TRUE	UP	YHL033C		EGD1	45.2056	1.51644	0.361944	4.18972	2.79304e-05	0.000736932	TRUE	UP	YPL037C_mRNA
TSA1	98.9368	1.1878	0.284066	4.18142	2.89697e-05	0.000586513	TRUE	UP	YML028W		RPL23A	76.1719	1.51353	0.303977	4.97909	6.38853e-07	3.65211e-05	TRUE	UP	YBL087C_mRNA
RPL19A	71.7356	1.15213	0.343021	3.35878	0.000782878	0.0070571	TRUE	UP	YBR084C-A		RPL13A	43.4266	1.50589	0.49151	3.0638	0.00218547	0.0241811	TRUE	UP	YDL082W_mRNA
RPS5	152.754	1.03941	0.271038	3.83492	0.000125606	0.00169882	TRUE	UP	YJR123W		FPR1	47.0858	1.4943	0.354861	4.21095	2.54304e-05	0.000688627	TRUE	UP	YNL135C_mRNA
RPS12	173.912	1.02144	0.316529	3.22701	0.00125092	0.0099522	TRUE	UP	YOR369C		RPS15	103.431	1.43645	0.327726	4.3831	1.17003e-05	0.000354106	TRUE	UP	YOL040C_mRNA
RPL41B	316.078	-0.707426	0.249273	-2.83796	0.00454029	0.0267609	TRUE	DOWN	YDL133C-A		RPL5	64.1345	1.35861	0.442408	3.07095	0.00213377	0.0241811	TRUE	UP	YPL131W_mRNA
RPL31A	61.3134	-0.8941	0.314342	-2.84436	0.00445013	0.0267609	TRUE	DOWN	YDL075W		ZEO1	102.897	1.34267	0.3368	3.98655	6.70396e-05	0.00149757	TRUE	UP	YOL109W_mRNA
RPS18A	54.3261	-0.907926	0.34239	-2.65173	0.00800797	0.0428942	TRUE	DOWN	YDR450W		FBA1	221.518	1.33564	0.447896	2.98202	0.0028635	0.0291737	TRUE	UP	YKL060C_mRNA
NA.4	223.036	-0.931641	0.346745	-2.68682	0.00721352	0.0390252	TRUE	DOWN	NME1		PGK1	167.01	1.32539	0.272558	4.86278	1.15749e-06	5.67169e-05	TRUE	UP	YCR012W_mRNA
RPS18B	50.9306	-0.959703	0.338103	-2.8385	0.00453266	0.0267609	TRUE	DOWN	YML026C		HSC82	26.1794	1.30323	0.441743	2.9502	0.00317569	0.031726	TRUE	UP	YMR186W_mRNA
RPS16B	38.8113	-1.00707	0.386617	-2.60484	0.0091918	0.047815	TRUE	DOWN	YDL083C		EFB1	122.407	1.29714	0.270355	4.79789	1.60343e-06	6.87472e-05	TRUE	UP	YAL003W_mRNA
RPS22A	58.684	-1.02623	0.372846	-2.75243	0.0059154	0.0329921	TRUE	DOWN	YJL190C		RPL8A	24.0753	1.23922	0.445108	2.78408	0.00536793	0.0452754	TRUE	UP	YHL033C_mRNA
RPL35A	51.5528	-1.10887	0.344077	-3.22272	0.00126979	0.00995589	TRUE	DOWN	YDL191W		RPL12B	181.219	1.22183	0.359473	3.39893	0.00067649	0.00969373	TRUE	UP	YDR418W_mRNA
RPS19A	36.5962	-1.20955	0.448898	-2.69449	0.00704974	0.0385244	TRUE	DOWN	YOL121C		CWP2	213.301	1.21252	0.269746	4.49506	6.95515e-06	0.000230866	TRUE	UP	YKL096W-A_mRNA
RPS25B	50.8066	-1.21437	0.369008	-3.2909	0.000998673	0.00831203	TRUE	DOWN	YLR333C		TSA1	97.8445	1.13289	0.272624	4.1555	3.24573e-05	0.000834964	TRUE	UP	YML028W_mRNA
RPS24A	99.8315	-1.23858	0.296966	-4.17078	3.03556e-05	0.000586513	TRUE	DOWN	YER074W		ACT1	48.6904	1.12329	0.387888	2.89591	0.00378062	0.035366	TRUE	UP	YFL039C_mRNA
RPL27A	80.5501	-1.25851	0.339277	-3.70939	0.00020776	0.00244343	TRUE	DOWN	YHR010W		RPL19A	70.9167	1.10087	0.33599	3.2765	0.00105104	0.0136901	TRUE	UP	YBR084C-A_mRNA
RPL37A	56.6718	-1.25961	0.404882	-3.11105	0.00186425	0.0137021	TRUE	DOWN	YLR185W		NA.3	82.8514	1.08784	0.289405	3.75887	0.000170682	0.0033138	TRUE	UP	YDR366C_mRNA
TRX1	24.6372	-1.2997	0.463074	-2.80667	0.00500565	0.0288091	TRUE	DOWN	YLR043C		RPS5	150.677	0.998541	0.257451	3.87857	0.000105072	0.00220651	TRUE	UP	YJR123W_mRNA
RPS13	70.3443	-1.29975	0.325514	-3.99291	6.52665e-05	0.00100883	TRUE	DOWN	YDR064W		RPS12	172.79	0.983797	0.309587	3.17777	0.00148411	0.0175534	TRUE	UP	YOR369C_mRNA
RPS20	44.3143	-1.36258	0.39964	-3.40953	0.000650755	0.00625455	TRUE	DOWN	YHL015W		SOD1	76.5036	0.929615	0.337464	2.75471	0.00587439	0.0475965	TRUE	UP	YJR104C_mRNA
RPL20B	56.3777	-1.41027	0.341179	-4.13351	3.57268e-05	0.000666489	TRUE	DOWN	YOR312C		RPL41B	270.957	-0.76917	0.252734	-3.04339	0.00233925	0.0253378	TRUE	DOWN	YDL133C-A_mRNA
RPL25	42.7937	-1.44802	0.419442	-3.45225	0.00055594	0.00579969	TRUE	DOWN	YOL127W		RPL23B	74.8773	-0.82866	0.29467	-2.81216	0.00492097	0.0418486	TRUE	DOWN	YER117W_mRNA
RPL17B	18.647	-1.48797	0.540236	-2.7543	0.00588181	0.0329921	TRUE	DOWN	YJL177W		RPL31A	61.2766	-0.927582	0.302152	-3.06992	0.00214118	0.0241811	TRUE	DOWN	YDL075W_mRNA
RPS28A	71.0878	-1.50431	0.339873	-4.42608	9.59604e-06	0.000216311	TRUE	DOWN	YOR167C		RPS19B	47.4308	-0.939709	0.331547	-2.83432	0.00459237	0.0399864	TRUE	DOWN	YNL302C_mRNA
GSP1	16.9469	-1.65757	0.547338	-3.02843	0.00245828	0.0168346	TRUE	DOWN	YLR293C		RPS18A	54.4308	-0.946474	0.330817	-2.86102	0.00422278	0.0377847	TRUE	DOWN	YDR450W_mRNA
RPS7A	93.882	-1.76746	0.319864	-5.52568	3.28208e-08	1.9729e-06	TRUE	DOWN	YOR096W		RPS18B	48.9726	-0.991373	0.328865	-3.01453	0.00257377	0.0267516	TRUE	DOWN	YML026C_mRNA
RPS10A	40.6066	-1.83702	0.419762	-4.37634	1.20691e-05	0.000261174	TRUE	DOWN	YOR293W		RPS22A	58.5468	-1.05394	0.365664	-2.88227	0.00394825	0.0361841	TRUE	DOWN	YJL190C_mRNA
RPS10B	27.0587	-1.84121	0.506281	-3.63673	0.000276125	0.00317838	TRUE	DOWN	YMR230W		RPS16B	38.7559	-1.07804	0.373779	-2.88417	0.00392443	0.0361841	TRUE	DOWN	YDL083C_mRNA
RPL11B	20.2684	-1.85855	0.545653	-3.4061	0.000658982	0.00625455	TRUE	DOWN	YGR085C		RPL35A	51.3739	-1.20497	0.333052	-3.61798	0.000296914	0.0050086	TRUE	DOWN	YDL191W_mRNA
RPS27B	57.4443	-1.93426	0.389632	-4.96431	6.89453e-07	2.66424e-05	TRUE	DOWN	YHR021C		RPS19A	36.4185	-1.21632	0.441294	-2.75626	0.00584665	0.0475965	TRUE	DOWN	YOL121C_mRNA
NHP2	12.5072	-1.95166	0.631114	-3.0924	0.00198544	0.0140801	TRUE	DOWN	YDL208W		RPS25B	51.1407	-1.25575	0.355563	-3.53171	0.000412879	0.00653619	TRUE	DOWN	YLR333C_mRNA
RPS11A	18.936	-2.09195	0.563889	-3.70986	0.000207378	0.00244343	TRUE	DOWN	YDR025W		RPL37A	56.5364	-1.26213	0.394268	-3.20121	0.00136851	0.0163743	TRUE	DOWN	YLR185W_mRNA
RPL40B	55.2598	-2.30385	0.392564	-5.86872	4.39172e-09	3.95986e-07	TRUE	DOWN	YKR094C		RPS24A	98.968	-1.27808	0.287053	-4.45242	8.49063e-06	0.000273027	TRUE	DOWN	YER074W_mRNA
ALD5	8.56467	-2.31584	0.784229	-2.95302	0.00314682	0.0208068	TRUE	DOWN	YER073W		RPL27A	80.4255	-1.30273	0.328373	-3.96724	7.27108e-05	0.00155874	TRUE	DOWN	YHR010W_mRNA
RPS30B	9.77548	-2.74031	0.780129	-3.51264	0.000443683	0.00489862	TRUE	DOWN	YOR182C		TRX1	24.4176	-1.32687	0.451981	-2.93567	0.00332827	0.0323094	TRUE	DOWN	YLR043C_mRNA
LEU1	17.7827	-2.99889	0.619509	-4.84076	1.29346e-06	4.11625e-05	TRUE	DOWN	YGL009C		RPS13	70.6149	-1.3688	0.314777	-4.34847	1.37091e-05	0.000403046	TRUE	DOWN	YDR064W_mRNA
BAT1	7.87042	-3.36103	0.973784	-3.45151	0.000557456	0.00579969	TRUE	DOWN	YHR208W		RPL29	74.5997	-1.39082	0.344035	-4.04267	5.28453e-05	0.00129471	TRUE	DOWN	YFR032C-A_mRNA
NA.2	4.58017	-5.86501	1.49822	-3.91464	9.05385e-05	0.00128898	TRUE	DOWN	ETS2-1		RPL21A	31.0463	-1.40524	0.492781	-2.85166	0.00434921	0.0384609	TRUE	DOWN	YBR191W_mRNA
											RPS20	44.5215	-1.41643	0.386161	-3.66797	0.000244484	0.00433748	TRUE	DOWN	YHL015W_mRNA
											RPL20B	56.7881	-1.45183	0.330462	-4.39333	1.11627e-05	0.000348074	TRUE	DOWN	YOR312C_mRNA
											RPL25	42.6086	-1.48553	0.405602	-3.66254	0.00024973	0.00435546	TRUE	DOWN	YOL127W_mRNA
											RPL17B	18.595	-1.52655	0.526808	-2.89774	0.00375863	0.035366	TRUE	DOWN	YJL177W_mRNA
											RPS28A	71.3246	-1.53887	0.332512	-4.62802	3.69186e-06	0.000131022	TRUE	DOWN	YOR167C_mRNA
											RIB4	15.7668	-1.60765	0.531533	-3.02454	0.00249009	0.0261459	TRUE	DOWN	YOL143C_mRNA
											NA.4	1749.25	-1.69171	0.457692	-3.69617	0.000218874	0.00395126	TRUE	DOWN	YLR154W-B_mRNA
											GSP1	17.1042	-1.71692	0.527775	-3.25313	0.0011414	0.0143232	TRUE	DOWN	YLR293C_mRNA
											RPS7A	94.0373	-1.78761	0.30877	-5.78944	7.06206e-09	6.05572e-07	TRUE	DOWN	YOR096W_mRNA
											RPS10B	27.9289	-1.86231	0.486405	-3.82872	0.000128812	0.00259897	TRUE	DOWN	YMR230W_mRNA
											RPS10A	42.4802	-1.8777	0.408527	-4.59627	4.30122e-06	0.000147532	TRUE	DOWN	YOR293W_mRNA
											RPL11B	20.0926	-1.95088	0.533519	-3.65663	0.000255554	0.00438274	TRUE	DOWN	YGR085C_mRNA
											RPS11A	25.601	-1.96643	0.493858	-3.98178	6.8402e-05	0.00149757	TRUE	DOWN	YDR025W_mRNA
											RPS27B	56.9562	-1.97609	0.379127	-5.21222	1.86594e-07	1.20003e-05	TRUE	DOWN	YHR021C_mRNA
											NHP2	12.7191	-2.02353	0.615638	-3.28689	0.001013	0.0133639	TRUE	DOWN	YDL208W_mRNA
											LHP1	10.6962	-2.03453	0.670955	-3.03229	0.00242705	0.0257468	TRUE	DOWN	YDL051W_mRNA
											ALD5	7.95556	-2.23207	0.788877	-2.82943	0.00466314	0.0399864	TRUE	DOWN	YER073W_mRNA
											RPL40B	55.6325	-2.35493	0.382816	-6.15159	7.67097e-10	8.77047e-08	TRUE	DOWN	YKR094C_mRNA
											NA.5	1378.79	-2.63687	0.810391	-3.25383	0.00113862	0.0143232	TRUE	DOWN	YLR154C-G_mRNA
											RPS30B	9.42673	-2.71841	0.771232	-3.52476	0.000423863	0.0066084	TRUE	DOWN	YOR182C_mRNA
											LEU1	17.9	-3.0434	0.613945	-4.95712	7.15455e-07	3.87475e-05	TRUE	DOWN	YGL009C_mRNA
											BAT1	7.9339	-3.40836	0.962501	-3.54115	0.000398392	0.00640539	TRUE	DOWN	YHR208W_mRNA
											HIS3	82.3579	-3.49779	0.475877	-7.35019	1.9793e-13	5.09174e-11	TRUE	DOWN	YOR202W_mRNA
2 hour post-sequencing initiation											2 hour post-sequencing initiation
gene name	gene base mean	log 2 fold change	lfcSE	stat	p-value	p-adjusted	significance	significance_reg	gene ID		transcript name	transcript base mean	log 2 fold change	lfcSE	stat	p-value	p-adjusted	significance	significance_reg	gene ID
KanR	78.0049	9.45389	1.91607	4.93401	8.05579e-07	1.82488e-05	TRUE	UP	KanR		KanR	76.9562	9.42052	1.91497	4.91942	8.68025e-07	1.93649e-05	TRUE	UP	KanR
HygR	63.5188	8.19176	1.22606	6.68137	2.36716e-11	2.02119e-09	TRUE	UP	HygR		HygR	63.5343	7.28273	1.07374	6.7826	1.18033e-11	1.03448e-09	TRUE	UP	HygR
URA3	84.2707	6.70654	0.794262	8.44373	3.07358e-17	1.70584e-14	TRUE	UP	YEL021W		URA3	83.1207	6.67251	0.791836	8.42663	3.55766e-17	8.73049e-15	TRUE	UP	YEL021W_mRNA
ADD37	4.86657	5.45085	1.41347	3.85636	0.000115086	0.00122833	TRUE	UP	YMR184W		ADD37	4.80761	5.41898	1.4144	3.8313	0.000127467	0.00128199	TRUE	UP	YMR184W_mRNA
HSP26	19.7414	5.02509	0.958638	5.24191	1.58924e-07	4.64227e-06	TRUE	UP	YBR072W		HSP26	20.2223	5.04552	0.954439	5.28637	1.24766e-07	3.8272e-06	TRUE	UP	YBR072W_mRNA
HSP42	15.5559	4.65573	0.959379	4.85286	1.21692e-06	2.6486e-05	TRUE	UP	YDR171W		HSP42	15.3556	4.62243	0.962418	4.80294	1.56356e-06	3.19749e-05	TRUE	UP	YDR171W_mRNA
SQT1	15.292	4.62636	0.961959	4.80931	1.51449e-06	3.17186e-05	TRUE	UP	YIR012W		PMT1	5.4895	4.58423	1.388	3.30276	0.000957373	0.00679015	TRUE	UP	YDL095W_mRNA
NA.11	4.77908	4.40043	1.41834	3.10252	0.00191878	0.0131472	TRUE	UP	YJL144W		AIM17	5.32413	4.55825	1.39405	3.2698	0.00107624	0.00758932	TRUE	UP	YHL021C_mRNA
HRB1	4.63937	4.35208	1.41956	3.06578	0.002171	0.0143441	TRUE	UP	YNL004W		RME1	8.68438	4.35985	1.18577	3.67681	0.000236166	0.00222904	TRUE	UP	YGR044C_mRNA
ARC15	25.6228	4.34403	0.704011	6.1704	6.81193e-10	4.44779e-08	TRUE	UP	YIL062C		ARC15	25.6966	4.3344	0.706853	6.13197	8.67999e-10	5.60544e-08	TRUE	UP	YIL062C_mRNA
SAC6	11.9575	4.25483	0.981924	4.33315	1.4699e-05	0.00020653	TRUE	UP	YDR129C		PRY2	8.17425	4.22471	1.18772	3.55698	0.000375137	0.00331146	TRUE	UP	YKR013W_mRNA
TUB4	4.33207	4.24674	1.42566	2.97878	0.00289398	0.0179459	TRUE	UP	YLR212C		SAC6	11.8027	4.21987	0.985471	4.28208	1.85154e-05	0.000249653	TRUE	UP	YDR129C_mRNA
NA.6	7.51949	4.16088	1.19253	3.4891	0.000484641	0.00433832	TRUE	UP	YJR085C		SQT1	15.4534	4.18904	0.866854	4.83246	1.34856e-06	2.92784e-05	TRUE	UP	YIR012W_mRNA
SUP35	15.1267	4.15617	0.88245	4.7098	2.47959e-06	4.665e-05	TRUE	UP	YDR172W		SUP35	14.8169	4.11147	0.881112	4.66623	3.06773e-06	5.61806e-05	TRUE	UP	YDR172W_mRNA
ZPS1	12.9089	3.91158	0.880111	4.44442	8.81307e-06	0.000134007	TRUE	UP	YOL154W		PRE2	16.2164	3.91262	0.787966	4.96548	6.85325e-07	1.56992e-05	TRUE	UP	YPR103W_mRNA
COX5A	15.0137	3.83163	0.810405	4.72804	2.267e-06	4.41468e-05	TRUE	UP	YNL052W		ZPS1	12.8945	3.89534	0.880942	4.42179	9.78864e-06	0.000144707	TRUE	UP	YOL154W_mRNA
SEH1	5.98348	3.81097	1.23968	3.07416	0.00211099	0.0141156	TRUE	UP	YGL100W		COX5A	14.7091	3.78594	0.812559	4.65928	3.17324e-06	5.72583e-05	TRUE	UP	YNL052W_mRNA
PDC1	35.6784	3.76813	0.569124	6.62092	3.5696e-11	2.83018e-09	TRUE	UP	YLR044C		SEH1	5.91739	3.77971	1.24323	3.04024	0.00236392	0.0143511	TRUE	UP	YGL100W_mRNA
AIM17	5.56274	3.74119	1.2749	2.9345	0.0033409	0.0201543	TRUE	UP	YHL021C		PDE1	5.25628	3.59693	1.26248	2.84909	0.00438439	0.0230886	TRUE	UP	YGL248W_mRNA
OM45	5.50704	3.72996	1.28539	2.90182	0.00371008	0.0212278	TRUE	UP	YIL136W		YJU3	7.80979	3.58493	1.05601	3.3948	0.000686791	0.00550779	TRUE	UP	YKL094W_mRNA
ZRT1	19.3903	3.68332	0.760275	4.84471	1.26794e-06	2.70656e-05	TRUE	UP	YGL255W		NA.7	7.65907	3.53152	1.03035	3.42748	0.000609208	0.00495032	TRUE	UP	YJR085C_mRNA
PRE2	16.4382	3.67523	0.736488	4.99021	6.03128e-07	1.42441e-05	TRUE	UP	YPR103W		RPN11	22.3557	3.50667	0.632565	5.54358	2.96345e-08	1.1363e-06	TRUE	UP	YFR004W_mRNA
NA.15	5.58493	3.67174	1.25279	2.93085	0.00338038	0.0202823	TRUE	UP	YIL169C		ALD6	39.497	3.48379	0.510348	6.82631	8.71291e-12	8.22364e-10	TRUE	UP	YPL061W_mRNA
NAS2	5.42974	3.60669	1.2812	2.81509	0.00487641	0.0258986	TRUE	UP	YIL007C		ZRT1	19.4878	3.46355	0.718121	4.82307	1.41364e-06	2.9399e-05	TRUE	UP	YGL255W_mRNA
RME1	5.22117	3.59319	1.24949	2.87574	0.00403085	0.0222599	TRUE	UP	YGR044C		SHM1	9.4225	3.42807	0.934052	3.6701	0.000242452	0.0022709	TRUE	UP	YBR263W_mRNA
RPN11	22.605	3.5381	0.626029	5.65167	1.58901e-08	6.29928e-07	TRUE	UP	YFR004W		HOS4	4.68723	3.40475	1.30356	2.6119	0.00900411	0.0410708	TRUE	UP	YIL112W_mRNA
YJU3	7.49519	3.53759	1.05983	3.33789	0.000844157	0.00715278	TRUE	UP	YKL094W		SED1	54.7138	3.3695	0.433909	7.76544	8.13594e-15	1.24785e-12	TRUE	UP	YDR077W_mRNA
ALD6	40.0594	3.52137	0.507178	6.94306	3.83685e-12	3.87173e-10	TRUE	UP	YPL061W		CDC19	144.662	3.34852	0.313015	10.6976	1.04402e-26	1.28101e-23	TRUE	UP	YAL038W_mRNA
SED1	55.1975	3.46903	0.433082	8.01011	1.14607e-15	2.54427e-13	TRUE	UP	YDR077W		GLR1	9.02139	3.3369	0.927191	3.59894	0.00031952	0.00288273	TRUE	UP	YPL091W_mRNA
PDE1	4.79502	3.46793	1.28522	2.69831	0.00696932	0.0351567	TRUE	UP	YGL248W		NA.5	10.7733	3.29141	0.85381	3.85497	0.000115744	0.0011737	TRUE	UP	YJR015W_mRNA
GLR1	9.14406	3.37232	0.924049	3.6495	0.000262752	0.00255838	TRUE	UP	YPL091W		HSP82	10.8401	3.25469	0.858191	3.7925	0.000149139	0.00146395	TRUE	UP	YPL240C_mRNA
HOS4	4.49304	3.35386	1.30863	2.56287	0.0103811	0.0482135	TRUE	UP	YIL112W		KTR1	20.0912	3.1575	0.621737	5.07851	3.80405e-07	9.93099e-06	TRUE	UP	YOR099W_mRNA
HSP82	10.8508	3.27191	0.862719	3.79256	0.000149104	0.00156137	TRUE	UP	YPL240C		ARD1	6.17283	3.15092	1.07728	2.92489	0.00344581	0.0191312	TRUE	UP	YHR013C_mRNA
DJP1	6.04484	3.17718	1.07699	2.95006	0.00317709	0.0193767	TRUE	UP	YIR004W		NAS2	8.03711	3.14557	0.939216	3.34915	0.000810611	0.00621637	TRUE	UP	YIL007C_mRNA
ARD1	6.10133	3.14795	1.08339	2.90567	0.00366473	0.0211867	TRUE	UP	YHR013C		DJP1	5.96434	3.14071	1.08185	2.90309	0.00369506	0.0201504	TRUE	UP	YIR004W_mRNA
PUP1	15.4345	3.11899	0.694974	4.48792	7.19223e-06	0.000112531	TRUE	UP	YOR157C		OM45	5.60572	3.12221	1.14477	2.72738	0.00638402	0.0315855	TRUE	UP	YIL136W_mRNA
BUD21	7.54165	3.07279	1.00346	3.06218	0.00219728	0.0144318	TRUE	UP	YOR078W		NA.3	4411.24	3.08803	0.754455	4.09306	4.25722e-05	0.000517189	TRUE	UP	YLR154W-A_mRNA
MVD1	13.1861	3.0677	0.747665	4.10304	4.07749e-05	0.000520232	TRUE	UP	YNR043W		RPT1	16.9224	3.08074	0.669786	4.59959	4.23317e-06	7.4625e-05	TRUE	UP	YKL145W_mRNA
KTR1	20.3619	3.03882	0.597352	5.08714	3.63499e-07	9.17009e-06	TRUE	UP	YOR099W		YRB2	7.6324	3.07108	1.05859	2.90112	0.00371834	0.0201876	TRUE	UP	YIL063C_mRNA
NA.5	10.7983	3.03099	0.816226	3.71342	0.000204478	0.00207292	TRUE	UP	YJR015W		MVD1	13.073	3.03628	0.750702	4.04459	5.24148e-05	0.000614934	TRUE	UP	YNR043W_mRNA
TRP3	7.1822	3.00847	0.97608	3.0822	0.00205477	0.0139073	TRUE	UP	YKL211C		CRH1	7.46784	2.99935	0.984504	3.04655	0.0023148	0.0142727	TRUE	UP	YGR189C_mRNA
CRH1	7.39057	3.00128	0.990674	3.02953	0.00244932	0.0157153	TRUE	UP	YGR189C		LEM3	5.39355	2.97968	1.13976	2.61431	0.00894088	0.0409346	TRUE	UP	YNL323W_mRNA
ARC35	9.05208	2.98574	0.887722	3.36337	0.000769968	0.00667706	TRUE	UP	YNR035C		TPD3	5.39806	2.97478	1.09284	2.72206	0.00648761	0.0318334	TRUE	UP	YAL016W_mRNA
SSL2	5.18341	2.96814	1.10878	2.67694	0.00742982	0.0366538	TRUE	UP	YIL143C		TRP3	7.08726	2.97165	0.977347	3.04053	0.00236163	0.0143511	TRUE	UP	YKL211C_mRNA
RFA2	15.9976	2.92668	0.734422	3.98501	6.74769e-05	0.000757878	TRUE	UP	YNL312W		RFA2	16.5252	2.96249	0.712958	4.15521	3.24994e-05	0.000406906	TRUE	UP	YNL312W_mRNA
YAP1	6.8364	2.89077	0.987547	2.92722	0.00342006	0.0203009	TRUE	UP	YML007W		ARC35	8.96275	2.9553	0.887099	3.33142	0.000864028	0.0064644	TRUE	UP	YNR035C_mRNA
RPT6	6.61022	2.88657	0.998586	2.89065	0.00384443	0.0217721	TRUE	UP	YGL048C		SSL2	5.13142	2.93715	1.11696	2.6296	0.00854855	0.0398824	TRUE	UP	YIL143C_mRNA
PUP3	17.9831	2.88374	0.64258	4.48775	7.19791e-06	0.000112531	TRUE	UP	YER094C		PUP1	15.6289	2.92791	0.669265	4.37482	1.21535e-05	0.000173399	TRUE	UP	YOR157C_mRNA
YRB2	6.74111	2.88175	1.09184	2.63935	0.00830661	0.0404401	TRUE	UP	YIL063C		YAP1	6.89257	2.88793	0.98074	2.94464	0.00323327	0.0181983	TRUE	UP	YML007W_mRNA
SEC62	19.5929	2.8016	0.65181	4.29819	1.72199e-05	0.000235976	TRUE	UP	YPL094C		RPT6	6.5212	2.85104	0.998926	2.8541	0.00431585	0.0229245	TRUE	UP	YGL048C_mRNA
KRS1	52.4439	2.77314	0.413542	6.70582	2.00279e-11	1.85258e-09	TRUE	UP	YDR037W		PUP3	17.7641	2.8483	0.641559	4.43965	9.01043e-06	0.000136733	TRUE	UP	YER094C_mRNA
RPF1	6.17243	2.74888	0.988969	2.77954	0.00544366	0.0282358	TRUE	UP	YHR088W		HAM1	13.1941	2.84519	0.714628	3.98136	6.85231e-05	0.000754127	TRUE	UP	YJR069C_mRNA
AHA1	13.7714	2.72285	0.668096	4.07553	4.59089e-05	0.000566209	TRUE	UP	YDR214W		CIS3	6.54565	2.83147	1.00036	2.83045	0.00464825	0.0239639	TRUE	UP	YJL158C_mRNA
MRPL13	7.47826	2.71142	0.91624	2.95929	0.00308347	0.0189097	TRUE	UP	YKR006C		SBH2	39.9062	2.81147	0.492461	5.70903	1.13624e-08	4.64723e-07	TRUE	UP	YER019C-A_mRNA
ERG10	22.3949	2.69389	0.561949	4.79383	1.63628e-06	3.36347e-05	TRUE	UP	YPL028W		KRS1	52.5432	2.8068	0.417264	6.72667	1.73586e-11	1.41993e-09	TRUE	UP	YDR037W_mRNA
EFM4	8.8277	2.68964	0.859316	3.12998	0.0017482	0.0122044	TRUE	UP	YIL064W		BUD21	7.93834	2.7733	0.936082	2.96267	0.00304987	0.017325	TRUE	UP	YOR078W_mRNA
GLC8	9.00718	2.68632	0.831552	3.23049	0.00123578	0.0092751	TRUE	UP	YMR311C		EFM4	16.7559	2.73466	0.646769	4.22819	2.35583e-05	0.000310817	TRUE	UP	YIL064W_mRNA
PGI1	88.7041	2.6759	0.456479	5.86203	4.57241e-09	2.30699e-07	TRUE	UP	YBR196C		RPL10	451.508	2.71038	0.304	8.91572	4.84644e-19	1.98219e-16	TRUE	UP	YLR075W_mRNA
ADE16	8.89927	2.65384	0.828703	3.20241	0.00136284	0.00995235	TRUE	UP	YLR028C		AHA1	13.6236	2.68867	0.676717	3.97311	7.09417e-05	0.000770313	TRUE	UP	YDR214W_mRNA
PRC1	21.0559	2.6021	0.576641	4.51251	6.40648e-06	0.000103061	TRUE	UP	YMR297W		MRPL13	7.38418	2.67739	0.917237	2.91898	0.00351182	0.0194099	TRUE	UP	YKR006C_mRNA
RPL15A	256.052	2.592	0.312557	8.29287	1.10546e-16	4.09019e-14	TRUE	UP	YLR029C		ERG10	22.3275	2.67084	0.564399	4.73219	2.22111e-06	4.19278e-05	TRUE	UP	YPL028W_mRNA
SBH2	12.9298	2.58317	0.71136	3.63131	0.000281982	0.00269827	TRUE	UP	YER019C-A		SEC62	19.7125	2.66542	0.638966	4.17146	3.02658e-05	0.000390907	TRUE	UP	YPL094C_mRNA
CIS3	6.76766	2.55106	0.947351	2.69284	0.00708459	0.035423	TRUE	UP	YJL158C		GLC8	8.90056	2.64921	0.834092	3.17616	0.00149238	0.00984489	TRUE	UP	YMR311C_mRNA
RPL3	31.6202	2.53538	0.460352	5.50748	3.64011e-08	1.34684e-06	TRUE	UP	YOR063W		PGI1	87.8405	2.64471	0.439723	6.01448	1.80466e-09	1.00651e-07	TRUE	UP	YBR196C_mRNA
APA1	19.0341	2.50188	0.593273	4.21708	2.47486e-05	0.000327035	TRUE	UP	YCL050C		ADE16	8.91957	2.6428	0.831964	3.17658	0.00149021	0.00984489	TRUE	UP	YLR028C_mRNA
SHE10	7.59279	2.46423	0.876324	2.812	0.00492341	0.0259217	TRUE	UP	YGL228W		HSP104	5.801	2.58173	1.01502	2.54353	0.010974	0.0477486	TRUE	UP	YLL026W_mRNA
RPL2B	586.46	2.4328	0.512142	4.75024	2.03175e-06	4.10044e-05	TRUE	UP	YIL018W		MAK3	5.5822	2.57587	1.00004	2.57576	0.010002	0.0444654	TRUE	UP	YPR051W_mRNA
FTR1	7.6831	2.42045	0.830024	2.91613	0.00354408	0.0207049	TRUE	UP	YER145C		RPL15A	254.422	2.57381	0.31117	8.27137	1.32431e-16	2.58278e-14	TRUE	UP	YLR029C_mRNA
ERG2	40.4428	2.40923	0.416089	5.79018	7.03127e-09	3.12188e-07	TRUE	UP	YMR202W		PRC1	20.8575	2.56762	0.578387	4.43927	9.02636e-06	0.000136733	TRUE	UP	YMR297W_mRNA
FKS1	7.6561	2.40717	0.848429	2.8372	0.00455108	0.0245892	TRUE	UP	YLR342W		NA.1	64.385	2.40891	0.376395	6.39996	1.55422e-10	1.12178e-08	TRUE	UP	YLR154W-F_mRNA
NIF3	12.7288	2.40209	0.659865	3.64028	0.000272343	0.0026287	TRUE	UP	YGL221C		YIP5	6.31193	2.39732	0.918781	2.60924	0.00907434	0.0410857	TRUE	UP	YGL161C_mRNA
YIF1	8.92839	2.3915	0.798377	2.99545	0.00274036	0.0173817	TRUE	UP	YNL263C		RPL3	31.8475	2.39227	0.458788	5.21433	1.84483e-07	5.52099e-06	TRUE	UP	YOR063W_mRNA
RPN2	13.2051	2.35308	0.677136	3.47505	0.000510753	0.00453548	TRUE	UP	YIL075C		RPL2B	583.267	2.38893	0.471331	5.06848	4.01008e-07	1.02508e-05	TRUE	UP	YIL018W_mRNA
YIP5	6.08695	2.3525	0.918995	2.55986	0.0104715	0.0482296	TRUE	UP	YGL161C		PRO3	14.0407	2.38876	0.712494	3.35267	0.000800369	0.00621065	TRUE	UP	YER023W_mRNA
SGT2	26.9412	2.35129	0.47407	4.95979	7.05699e-07	1.63193e-05	TRUE	UP	YOR007C		FTR1	7.61201	2.38751	0.841307	2.83786	0.00454168	0.0237268	TRUE	UP	YER145C_mRNA
TOA2	8.62945	2.32848	0.803838	2.8967	0.0037711	0.0214663	TRUE	UP	YKL058W		IDH1	20.022	2.38728	0.553736	4.31123	1.62351e-05	0.000223826	TRUE	UP	YNL037C_mRNA
YPT31	8.58822	2.32546	0.808204	2.87731	0.00401076	0.0222597	TRUE	UP	YER031C		ERG2	40.1992	2.38285	0.424919	5.60778	2.04936e-08	8.11148e-07	TRUE	UP	YMR202W_mRNA
TIM11	20.8595	2.32256	0.554734	4.18681	2.82907e-05	0.000369444	TRUE	UP	YDR322C-A		NIF3	12.6122	2.36858	0.669718	3.53669	0.000405179	0.00350109	TRUE	UP	YGL221C_mRNA
CIT2	46.9636	2.3155	0.499535	4.63531	3.56406e-06	6.08631e-05	TRUE	UP	YCR005C		YIF1	8.84441	2.35991	0.803009	2.93883	0.00329454	0.0183746	TRUE	UP	YNL263C_mRNA
TPI1	325.4	2.27802	0.243618	9.3508	8.69884e-21	9.65571e-18	TRUE	UP	YDR050C		FKS1	10.0264	2.35924	0.755505	3.12273	0.00179179	0.0113914	TRUE	UP	YLR342W_mRNA
IDH1	18.5953	2.27763	0.567353	4.01449	5.95749e-05	0.000688834	TRUE	UP	YNL037C		SGT2	26.557	2.31007	0.483922	4.77364	1.80925e-06	3.58057e-05	TRUE	UP	YOR007C_mRNA
MBF1	12.8558	2.27654	0.684649	3.32512	0.000883817	0.0074321	TRUE	UP	YOR298C-A		RPN2	12.9302	2.30067	0.679837	3.38414	0.000714011	0.00567193	TRUE	UP	YIL075C_mRNA
PRP43	8.29019	2.25459	0.799008	2.82173	0.00477649	0.0254899	TRUE	UP	YGL120C		TIM11	20.8054	2.30001	0.558407	4.11888	3.80712e-05	0.000467134	TRUE	UP	YDR322C-A_mRNA
AIM20	10.3706	2.24842	0.735441	3.05724	0.00223387	0.0145859	TRUE	UP	YIL158W		APA1	19.1985	2.28752	0.568876	4.02112	5.79209e-05	0.000664196	TRUE	UP	YCL050C_mRNA
TMA10	6.79173	2.23366	0.874481	2.55426	0.0106412	0.0486524	TRUE	UP	YLR327C		CIT2	46.8367	2.24292	0.487761	4.59841	4.25733e-06	7.4625e-05	TRUE	UP	YCR005C_mRNA
STH1	14.1891	2.16183	0.643173	3.36119	0.000776064	0.00667776	TRUE	UP	YIL126W		TPI1	324.121	2.235	0.251788	8.87652	6.89868e-19	2.11617e-16	TRUE	UP	YDR050C_mRNA
PRE7	15.1027	2.1443	0.610348	3.51325	0.000442669	0.00399481	TRUE	UP	YBL041W		SHE10	7.84729	2.23057	0.83847	2.66029	0.00780736	0.0371449	TRUE	UP	YGL228W_mRNA
RPT5	11.8916	2.12599	0.659831	3.22202	0.0012729	0.00948271	TRUE	UP	YOR117W		PRP43	8.21334	2.22097	0.806765	2.75294	0.00590635	0.02958	TRUE	UP	YGL120C_mRNA
STI1	26.8764	2.10761	0.656643	3.20967	0.00132887	0.00976852	TRUE	UP	YOR027W		AIM20	10.248	2.21266	0.737701	2.9994	0.00270514	0.0157308	TRUE	UP	YIL158W_mRNA
ELO1	21.8622	2.10212	0.527562	3.9846	6.75945e-05	0.000757878	TRUE	UP	YJL196C		RPF1	6.74927	2.20332	0.869916	2.5328	0.0113155	0.048888	TRUE	UP	YHR088W_mRNA
NA.4	28.3095	2.10118	0.508225	4.13436	3.55947e-05	0.000459421	TRUE	UP	snR30		TOA2	9.29584	2.20004	0.769821	2.85786	0.00426507	0.0227532	TRUE	UP	YKL058W_mRNA
SDD2	35.6273	2.09196	0.416092	5.02764	4.96549e-07	1.1982e-05	TRUE	UP	YMR074C		PRE7	18.7751	2.14914	0.561314	3.82877	0.000128784	0.0012847	TRUE	UP	YBL041W_mRNA
NA.7	18.6292	2.01456	0.603479	3.33824	0.000843097	0.00715278	TRUE	UP	YJL055W		STH1	14.1635	2.14037	0.644175	3.32265	0.000891663	0.00655132	TRUE	UP	YIL126W_mRNA
CDC48	14.1598	2.00986	0.653435	3.07584	0.00209912	0.0141156	TRUE	UP	YDL126C		RPT5	11.7913	2.09283	0.669136	3.12766	0.00176203	0.0112605	TRUE	UP	YOR117W_mRNA
YRB1	102.117	2.00969	0.288727	6.96051	3.39045e-12	3.7634e-10	TRUE	UP	YDR002W		ELO1	21.8068	2.07897	0.531651	3.91041	9.21385e-05	0.000942116	TRUE	UP	YJL196C_mRNA
PNC1	8.87943	2.0094	0.754107	2.66461	0.00770772	0.0378565	TRUE	UP	YGL037C		STI1	26.7701	2.0754	0.613447	3.38319	0.000716503	0.00567193	TRUE	UP	YOR027W_mRNA
RPL18B	31.6999	1.9849	0.422418	4.69891	2.61553e-06	4.83872e-05	TRUE	UP	YNL301C		SDD2	35.5998	2.0265	0.423812	4.78162	1.73891e-06	3.49777e-05	TRUE	UP	YMR074C_mRNA
KRE2	27.4489	1.97146	0.497522	3.96255	7.41536e-05	0.000823104	TRUE	UP	YDR483W		MBF1	107.304	2.02338	0.324157	6.242	4.32024e-10	2.94497e-08	TRUE	UP	YOR298C-A_mRNA
YET3	13.668	1.96184	0.604113	3.24747	0.00116437	0.00903812	TRUE	UP	YDL072C		YPT31	10.1386	1.99561	0.7118	2.8036	0.00505349	0.0256224	TRUE	UP	YER031C_mRNA
NA.9	17.9781	1.92212	0.613661	3.13222	0.00173489	0.0122044	TRUE	UP	YOR052C		PDB1	27.0908	1.99438	0.482777	4.13107	3.61086e-05	0.000447528	TRUE	UP	YBR221C_mRNA
PDB1	27.6575	1.90932	0.465742	4.09952	4.14015e-05	0.000522223	TRUE	UP	YBR221C		TMC1	17.7307	1.98305	0.606822	3.26793	0.00108338	0.00759604	TRUE	UP	YOR052C_mRNA
PHO3	9.21584	1.87238	0.730554	2.56296	0.0103785	0.0482135	TRUE	UP	YBR092C		NA.8	18.4616	1.97834	0.594909	3.32544	0.000882782	0.00655132	TRUE	UP	YJL055W_mRNA
LCB2	14.8296	1.84372	0.57417	3.2111	0.00132229	0.00976852	TRUE	UP	YDR062W		CDC48	14.0115	1.97613	0.649063	3.04458	0.00233004	0.0142948	TRUE	UP	YDL126C_mRNA
ENO1	29.4149	1.83257	0.66517	2.75503	0.00586862	0.0301582	TRUE	UP	YGR254W		PDC1	46.6941	1.97413	0.383258	5.15091	2.5922e-07	7.06472e-06	TRUE	UP	YLR044C_mRNA
YEF3	94.9658	1.82633	0.301645	6.05456	1.40802e-09	8.22583e-08	TRUE	UP	YLR249W		YET3	13.8119	1.96302	0.611598	3.20965	0.00132895	0.00895943	TRUE	UP	YDL072C_mRNA
TPM1	77.4972	1.82617	0.336098	5.43345	5.52757e-08	1.97923e-06	TRUE	UP	YNL079C		YRB1	101.727	1.95164	0.29899	6.52743	6.69074e-11	5.13096e-09	TRUE	UP	YDR002W_mRNA
ACT1	104.727	1.82016	0.384732	4.731	2.23418e-06	4.41468e-05	TRUE	UP	YFL039C		RPL18B	31.4387	1.94718	0.43409	4.48566	7.26885e-06	0.00011583	TRUE	UP	YNL301C_mRNA
ERG13	22.8345	1.81593	0.489431	3.71029	0.000207025	0.00207292	TRUE	UP	YML126C		NUG1	11.5735	1.94318	0.728293	2.66812	0.00762759	0.0365588	TRUE	UP	YER006W_mRNA
TDH1	30.8843	1.81315	0.459081	3.94952	7.83065e-05	0.000852159	TRUE	UP	YJL052W		VMA1	9.80798	1.94267	0.740058	2.62503	0.00866418	0.039966	TRUE	UP	YDL185W_mRNA
TCB3	11.7796	1.80591	0.651348	2.77258	0.00556141	0.0287124	TRUE	UP	YML072C		RPS2	272.217	1.92696	0.265906	7.24677	4.26821e-13	4.36425e-11	TRUE	UP	YGL123W_mRNA
PIS1	22.7893	1.78934	0.500449	3.57546	0.000349609	0.00323389	TRUE	UP	YPR113W		KRE2	27.557	1.89167	0.495889	3.81471	0.000136345	0.00134915	TRUE	UP	YDR483W_mRNA
RPL13A	116.781	1.78367	0.409165	4.3593	1.30482e-05	0.000189947	TRUE	UP	YDL082W		TIM17	13.6538	1.88253	0.667807	2.81897	0.00481784	0.0246312	TRUE	UP	YJL143W_mRNA
CAJ1	16.5786	1.77655	0.623474	2.84944	0.00437964	0.0240664	TRUE	UP	YER048C		EXG1	17.0161	1.86938	0.556388	3.35985	0.00077985	0.00609475	TRUE	UP	YLR300W_mRNA
SAH1	75.0553	1.77226	0.327909	5.40474	6.49008e-08	2.18303e-06	TRUE	UP	YER043C		GLK1	13.5448	1.80566	0.614274	2.93951	0.00328735	0.0183746	TRUE	UP	YCL040W_mRNA
FPR1	119.88	1.76108	0.27153	6.48575	8.82922e-11	6.53363e-09	TRUE	UP	YNL135C		ERG13	22.7994	1.79349	0.497304	3.60642	0.000310456	0.00284276	TRUE	UP	YML126C_mRNA
RPL8A	64.8459	1.76015	0.334009	5.26977	1.36597e-07	4.21173e-06	TRUE	UP	YHL033C		TDH1	30.8784	1.79323	0.458237	3.91332	9.10353e-05	0.000938658	TRUE	UP	YJL052W_mRNA
ADH3	24.9499	1.75181	0.472191	3.70996	0.000207292	0.00207292	TRUE	UP	YMR083W		ENO1	29.0242	1.79261	0.633311	2.83054	0.00464692	0.0239639	TRUE	UP	YGR254W_mRNA
EXG1	17.4276	1.73844	0.537161	3.23635	0.00121069	0.00921005	TRUE	UP	YLR300W		TPM1	77.4481	1.79055	0.335798	5.33222	9.70171e-08	3.2173e-06	TRUE	UP	YNL079C_mRNA
TEF2	339.525	1.73423	0.337483	5.13873	2.76603e-07	7.48853e-06	TRUE	UP	YBR118W		TCB3	11.8065	1.79002	0.656834	2.72522	0.00642583	0.0316646	TRUE	UP	YML072C_mRNA
PDA1	32.4665	1.7212	0.520636	3.30597	0.000946496	0.0078453	TRUE	UP	YER178W		YEF3	93.9202	1.78808	0.308359	5.79869	6.68341e-09	2.92877e-07	TRUE	UP	YLR249W_mRNA
RPL5	162.54	1.66472	0.433069	3.84402	0.000121037	0.00127953	TRUE	UP	YPL131W		RPL13A	115.623	1.76409	0.392947	4.48938	7.14309e-06	0.000115552	TRUE	UP	YDL082W_mRNA
RPN6	18.5231	1.63216	0.545961	2.98951	0.00279421	0.0176226	TRUE	UP	YDL097C		PIS1	22.5947	1.7544	0.504895	3.47478	0.000511269	0.00432639	TRUE	UP	YPR113W_mRNA
TEF1	319.352	1.62146	0.317444	5.10785	3.25851e-07	8.4115e-06	TRUE	UP	YPR080W		CAJ1	16.4311	1.7408	0.61346	2.83768	0.00454426	0.0237268	TRUE	UP	YER048C_mRNA
SIS1	26.0365	1.60937	0.445993	3.60852	0.000307954	0.00292162	TRUE	UP	YNL007C		SAH1	75.2129	1.73681	0.335596	5.1753	2.2754e-07	6.49284e-06	TRUE	UP	YER043C_mRNA
CWP1	23.99	1.60763	0.558014	2.88098	0.00396437	0.0222245	TRUE	UP	YKL096W		LCB2	14.8903	1.72889	0.575525	3.00402	0.00266437	0.0155675	TRUE	UP	YDR062W_mRNA
RPS15	272.267	1.60287	0.283299	5.65787	1.53263e-08	6.29928e-07	TRUE	UP	YOL040C		OYE2	15.9402	1.72609	0.676569	2.55124	0.0107341	0.0470017	TRUE	UP	YHR179W_mRNA
EGD1	108.723	1.59537	0.274277	5.81663	6.00446e-09	2.77706e-07	TRUE	UP	YPL037C		RPL8B	96.084	1.72133	0.301216	5.71459	1.09966e-08	4.64723e-07	TRUE	UP	YLL045C_mRNA
ERG3	14.3854	1.56475	0.582332	2.68705	0.00720866	0.0358817	TRUE	UP	YLR056W		FPR1	121.733	1.71411	0.283159	6.05351	1.41726e-09	8.28084e-08	TRUE	UP	YNL135C_mRNA
RPL23A	198.377	1.55198	0.24134	6.43069	1.27023e-10	8.8122e-09	TRUE	UP	YBL087C		CCT2	21.7907	1.70474	0.514194	3.31537	0.000915223	0.00668416	TRUE	UP	YIL142W_mRNA
NA.13	18.9165	1.55159	0.509891	3.04299	0.00234243	0.0151168	TRUE	UP	YIR035C		SEC4	14.4483	1.69361	0.58827	2.87896	0.0039899	0.021472	TRUE	UP	YFL005W_mRNA
FBA1	547.205	1.52986	0.465407	3.28714	0.0010121	0.00814078	TRUE	UP	YKL060C		RPL8A	64.7414	1.68912	0.34028	4.9639	6.90918e-07	1.56992e-05	TRUE	UP	YHL033C_mRNA
EFT2	99.763	1.52347	0.288565	5.27946	1.29562e-07	4.10896e-06	TRUE	UP	YDR385W		PDA1	32.2304	1.68891	0.504959	3.34464	0.000823889	0.00624019	TRUE	UP	YER178W_mRNA
EFT1	48.4084	1.52084	0.384753	3.95278	7.7247e-05	0.000848952	TRUE	UP	YOR133W		TEF2	344.032	1.68464	0.318518	5.28898	1.22997e-07	3.8272e-06	TRUE	UP	YBR118W_mRNA
SML1	49.5706	1.47378	0.450761	3.26954	0.00107722	0.00854084	TRUE	UP	YML058W		ADH3	24.7654	1.66941	0.470291	3.54974	0.000385612	0.00337961	TRUE	UP	YMR083W_mRNA
CCW12	553.054	1.44651	0.453159	3.19206	0.00141261	0.0102484	TRUE	UP	YLR110C		CWP1	23.8589	1.63606	0.538368	3.03892	0.00237431	0.0143511	TRUE	UP	YKL096W_mRNA
PRE10	18.5603	1.44125	0.513727	2.80548	0.00502419	0.0262717	TRUE	UP	YOR362C		RPL5	162.018	1.6309	0.412572	3.95302	7.71709e-05	0.00081859	TRUE	UP	YPL131W_mRNA
ZEO1	260.826	1.43756	0.32993	4.35715	1.31765e-05	0.000189947	TRUE	UP	YOL109W		TEF1	312.109	1.6023	0.320855	4.99384	5.91903e-07	1.39666e-05	TRUE	UP	YPR080W_mRNA
GVP36	48.3697	1.41617	0.433513	3.26673	0.00108796	0.0085648	TRUE	UP	YIL041W		RPN6	18.3829	1.59965	0.548456	2.91664	0.00353827	0.0194684	TRUE	UP	YDL097C_mRNA
GLN1	50.8975	1.39516	0.340765	4.09419	4.23639e-05	0.000528358	TRUE	UP	YPR035W		SIS1	26.0809	1.59343	0.455687	3.49676	0.000470938	0.00404085	TRUE	UP	YNL007C_mRNA
CWP2	519.918	1.39432	0.251557	5.54274	2.97779e-08	1.13978e-06	TRUE	UP	YKL096W-A		RPS15	270.627	1.57544	0.287961	5.47103	4.47415e-08	1.61464e-06	TRUE	UP	YOL040C_mRNA
RPL19A	182.7	1.30814	0.280572	4.6624	3.12536e-06	5.42055e-05	TRUE	UP	YBR084C-A		VMA4	27.9161	1.56553	0.449489	3.48291	0.000495999	0.00422633	TRUE	UP	YOR332W_mRNA
HSC82	58.8247	1.30665	0.348397	3.75046	0.00017651	0.00181413	TRUE	UP	YMR186W		EGD1	108.75	1.54782	0.287461	5.38444	7.26705e-08	2.54762e-06	TRUE	UP	YPL037C_mRNA
SNC2	20.7448	1.24136	0.480249	2.58482	0.00974293	0.0462165	TRUE	UP	YOR327C		GND1	22.2128	1.54487	0.539567	2.86318	0.00419417	0.0224727	TRUE	UP	YHR183W_mRNA
TSA1	257.433	1.21687	0.234584	5.18735	2.13313e-07	6.07121e-06	TRUE	UP	YML028W		NHP6B	30.4239	1.54078	0.446301	3.45235	0.000555732	0.00460732	TRUE	UP	YBR089C-A_mRNA
EFB1	305.077	1.20038	0.257401	4.66347	3.10916e-06	5.42055e-05	TRUE	UP	YAL003W		NA.12	18.9309	1.53229	0.519331	2.95052	0.00317244	0.0179382	TRUE	UP	YIR035C_mRNA
COX9	33.8559	1.1898	0.436031	2.72869	0.0063586	0.0323764	TRUE	UP	YDL067C		EFT2	97.0606	1.52803	0.302895	5.04474	4.54143e-07	1.13721e-05	TRUE	UP	YDR385W_mRNA
RPS5	391.465	1.15242	0.245495	4.69427	2.67556e-06	4.86865e-05	TRUE	UP	YJR123W		RPL23A	197.492	1.51678	0.256644	5.91004	3.42029e-09	1.67868e-07	TRUE	UP	YBL087C_mRNA
RPS12	434.128	1.09389	0.298091	3.66965	0.000242878	0.0024071	TRUE	UP	YOR369C		ERG3	14.1479	1.51564	0.589916	2.56924	0.0101921	0.0451063	TRUE	UP	YLR056W_mRNA
RPL24B	153.216	0.8999	0.320051	2.81174	0.00492746	0.0259217	TRUE	UP	YGR148C		FBA1	545.716	1.49348	0.435142	3.43218	0.000598757	0.00489784	TRUE	UP	YKL060C_mRNA
RPS0A	105.116	0.836046	0.298121	2.80438	0.00504133	0.0262717	TRUE	UP	YGR214W		NA.14	17.0034	1.48691	0.559304	2.6585	0.00784884	0.0371835	TRUE	UP	YNL150W_mRNA
AHP1	190.671	0.688052	0.242558	2.83665	0.00455893	0.0245892	TRUE	UP	YLR109W		SML1	48.9022	1.47488	0.438054	3.36688	0.000760246	0.00597963	TRUE	UP	YML058W_mRNA
RPP1A	528.523	-0.620721	0.237948	-2.60865	0.00909012	0.0436798	TRUE	DOWN	YDL081C		EFT1	49.4106	1.46036	0.38852	3.75878	0.000170745	0.00166273	TRUE	UP	YOR133W_mRNA
RPP1B	498.1	-0.671046	0.214364	-3.13041	0.00174562	0.0122044	TRUE	DOWN	YDL130W		ACT1	114.133	1.425	0.360544	3.95234	7.73891e-05	0.00081859	TRUE	UP	YFL039C_mRNA
RPL6A	147.37	-0.714191	0.27357	-2.61063	0.00903755	0.043616	TRUE	DOWN	YML073C		PRE10	19.3157	1.41537	0.513876	2.7543	0.00588182	0.0295779	TRUE	UP	YOR362C_mRNA
TMA19	138.335	-0.748919	0.277701	-2.69686	0.00699968	0.0351567	TRUE	DOWN	YKL056C		CCW12	552.197	1.41205	0.426123	3.31372	0.000920638	0.00668416	TRUE	UP	YLR110C_mRNA
HOR7	91.878	-0.788235	0.304475	-2.58884	0.00963009	0.0458773	TRUE	DOWN	YMR251W-A		PGK1	444.817	1.4105	0.292193	4.8273	1.38398e-06	2.92784e-05	TRUE	UP	YCR012W_mRNA
RPS8A	99.626	-0.793711	0.309465	-2.56478	0.010324	0.0482135	TRUE	DOWN	YBL072C		SPT4	20.4818	1.40978	0.515207	2.73633	0.00621293	0.0308634	TRUE	UP	YGR063C_mRNA
RPL41B	711.327	-0.797958	0.241827	-3.29971	0.000967849	0.00791464	TRUE	DOWN	YDL133C-A		GLN1	50.6299	1.39059	0.352857	3.94095	8.11609e-05	0.000851149	TRUE	UP	YPR035W_mRNA
ASC1	120.238	-0.823307	0.275589	-2.98744	0.00281323	0.0176234	TRUE	DOWN	YMR116C		GVP36	48.0854	1.38225	0.42588	3.24563	0.00117193	0.00803326	TRUE	UP	YIL041W_mRNA
RPS26A	126.941	-0.831225	0.30973	-2.68371	0.007281	0.03608	TRUE	DOWN	YGL189C		ZEO1	262.275	1.37937	0.317398	4.34587	1.38727e-05	0.00019343	TRUE	UP	YOL109W_mRNA
RPL32	154.118	-0.831293	0.252128	-3.29711	0.000976852	0.00791464	TRUE	DOWN	YBL092W		RHO1	21.3665	1.3548	0.525881	2.57624	0.00998814	0.0444654	TRUE	UP	YPR165W_mRNA
RPS7B	80.9316	-0.832752	0.278881	-2.98605	0.00282609	0.0176234	TRUE	DOWN	YNL096C		CWP2	567.967	1.30303	0.259609	5.01918	5.18919e-07	1.27343e-05	TRUE	UP	YKL096W-A_mRNA
RPL1B	80.0132	-0.837538	0.308374	-2.71598	0.00660795	0.0334924	TRUE	DOWN	YGL135W		RPL19A	182.054	1.27382	0.285493	4.46182	8.12676e-06	0.00012784	TRUE	UP	YBR084C-A_mRNA
RPL14A	68.6118	-0.840711	0.320094	-2.62645	0.00862809	0.0418217	TRUE	DOWN	YKL006W		HSC82	58.8941	1.26908	0.352502	3.60019	0.000317984	0.00288273	TRUE	UP	YMR186W_mRNA
RPS30A	92.3013	-0.882262	0.30041	-2.93685	0.0033156	0.020111	TRUE	DOWN	YLR287C-A		TSA1	256.014	1.18448	0.249051	4.75598	1.97484e-06	3.84624e-05	TRUE	UP	YML028W_mRNA
RPL33B	105.067	-0.912794	0.271017	-3.36803	0.000757078	0.00661698	TRUE	DOWN	YOR234C		RPL12B	494.802	1.17439	0.379922	3.09114	0.00199388	0.0126076	TRUE	UP	YDR418W_mRNA
RPS14B	75.089	-0.937664	0.283643	-3.30579	0.000947091	0.0078453	TRUE	DOWN	YJL191W		EFB1	307.163	1.14609	0.260029	4.40754	1.04552e-05	0.000150923	TRUE	UP	YAL003W_mRNA
VMA3	66.3191	-0.947232	0.345028	-2.74538	0.00604412	0.0309169	TRUE	DOWN	YEL027W		MEO1	60.8371	1.13575	0.361997	3.13746	0.00170421	0.0109744	TRUE	UP	YBR126W-A_mRNA
ARO2	43.4327	-0.954296	0.371632	-2.56785	0.0102332	0.0481307	TRUE	DOWN	YGL148W		COX9	33.755	1.12312	0.433539	2.59059	0.00958103	0.043062	TRUE	UP	YDL067C_mRNA
RPS18A	121.568	-0.955861	0.295367	-3.23618	0.00121141	0.00921005	TRUE	DOWN	YDR450W		NA.15	30.879	1.12083	0.433545	2.58526	0.0097305	0.0435742	TRUE	UP	YCR013C_mRNA
RPL1A	67.267	-0.969616	0.372465	-2.60324	0.00923463	0.0441829	TRUE	DOWN	YPL220W		RPS5	390.454	1.11511	0.250205	4.45678	8.32006e-06	0.000129224	TRUE	UP	YJR123W_mRNA
RPS18B	112.498	-0.986042	0.276034	-3.57218	0.000354025	0.00324767	TRUE	DOWN	YML026C		RPS12	435.773	1.055	0.290551	3.63104	0.000282286	0.00262398	TRUE	UP	YOR369C_mRNA
RPL34A	94.9285	-1.00744	0.275045	-3.66281	0.000249463	0.00245048	TRUE	DOWN	YER056C-A		NA.4	227.924	1.04809	0.267513	3.91789	8.93261e-05	0.00092884	TRUE	UP	YDR366C_mRNA
RPL23B	170.608	-1.03633	0.255918	-4.04948	5.13317e-05	0.000607855	TRUE	DOWN	YER117W		RPL24B	153.596	0.835164	0.319105	2.6172	0.00886531	0.0407406	TRUE	UP	YGR148C_mRNA
NA.17	35.8447	-1.06063	0.373944	-2.83634	0.00456341	0.0245892	TRUE	DOWN	YDR524W-C		SOD1	218.784	0.817587	0.320589	2.55027	0.010764	0.0470017	TRUE	UP	YJR104C_mRNA
RPL16B	108.806	-1.07953	0.349277	-3.09077	0.0019964	0.0135951	TRUE	DOWN	YNL069C		RPS0A	105.442	0.799779	0.303814	2.63246	0.00847691	0.0396991	TRUE	UP	YGR214W_mRNA
RPS16B	94.7352	-1.08319	0.301373	-3.59417	0.000325423	0.00306118	TRUE	DOWN	YDL083C		AHP1	191.301	0.643161	0.254529	2.52687	0.0115086	0.0495474	TRUE	UP	YLR109W_mRNA
NA.8	661.467	-1.08568	0.334056	-3.25001	0.00115403	0.00902093	TRUE	DOWN	NME1		RPP1A	529.669	-0.651878	0.245052	-2.66016	0.00781042	0.0371449	TRUE	DOWN	YDL081C_mRNA
SPO24	56.3401	-1.08624	0.355898	-3.05211	0.00227238	0.0147505	TRUE	DOWN	YPR036W-A		RPL26B	145.566	-0.660738	0.260223	-2.53913	0.011113	0.0481824	TRUE	DOWN	YGR034W_mRNA
ARF1	40.8942	-1.08892	0.384366	-2.83302	0.00461103	0.0247258	TRUE	DOWN	YDL192W		RPP1B	500.172	-0.699677	0.231124	-3.02728	0.00246764	0.014698	TRUE	DOWN	YDL130W_mRNA
RPS25A	58.2329	-1.08971	0.330358	-3.29858	0.000971743	0.00791464	TRUE	DOWN	YGR027C		RPS1A	117.021	-0.732463	0.282068	-2.59676	0.00941064	0.0424517	TRUE	DOWN	YLR441C_mRNA
RPL31A	143.429	-1.1221	0.257493	-4.35779	1.31384e-05	0.000189947	TRUE	DOWN	YDL075W		RPL6A	147.662	-0.750259	0.28061	-2.67367	0.00750256	0.0361006	TRUE	DOWN	YML073C_mRNA
NA.16	41.8654	-1.16543	0.39812	-2.92734	0.00341875	0.0203009	TRUE	DOWN	Q0032		TMA19	139.012	-0.772139	0.283789	-2.72082	0.00651196	0.0318334	TRUE	DOWN	YKL056C_mRNA
RPL11A	63.359	-1.18724	0.408171	-2.90869	0.00362944	0.0210925	TRUE	DOWN	YPR102C		NA.9	170.538	-0.830631	0.263758	-3.14922	0.00163709	0.0106281	TRUE	DOWN	YCR024C-B_mRNA
RPS25B	111.659	-1.19757	0.283963	-4.21734	2.47204e-05	0.000327035	TRUE	DOWN	YLR333C		NA.13	74.8682	-0.838104	0.308195	-2.7194	0.00654013	0.0318442	TRUE	DOWN	YDR034C-A_mRNA
RPL35B	30.4809	-1.23517	0.423315	-2.91785	0.00352448	0.0206994	TRUE	DOWN	YDL136W		RPL1B	79.1421	-0.838513	0.317407	-2.64176	0.0082476	0.0387732	TRUE	DOWN	YGL135W_mRNA
RPL35A	112.335	-1.23803	0.278268	-4.44904	8.62568e-06	0.000132979	TRUE	DOWN	YDL191W		HOR7	90.3597	-0.839607	0.309932	-2.70901	0.0067485	0.0327289	TRUE	DOWN	YMR251W-A_mRNA
VMA10	40.3975	-1.25821	0.396445	-3.17374	0.0015049	0.0108392	TRUE	DOWN	YHR039C-A		RPS7B	80.9446	-0.841194	0.294958	-2.85191	0.00434576	0.0229838	TRUE	DOWN	YNL096C_mRNA
RPL17B	43.5553	-1.28125	0.378045	-3.38915	0.000701086	0.00617623	TRUE	DOWN	YJL177W		ASC1	124.313	-0.847057	0.28091	-3.0154	0.00256642	0.0151394	TRUE	DOWN	YMR116C_mRNA
RPS19A	79.8554	-1.31826	0.329656	-3.99889	6.36391e-05	0.000728241	TRUE	DOWN	YOL121C		RPS8A	149.31	-0.851847	0.294778	-2.88979	0.00385495	0.0208371	TRUE	DOWN	YBL072C_mRNA
SEC53	22.3671	-1.33231	0.520363	-2.56035	0.0104565	0.0482296	TRUE	DOWN	YFL045C		RPL41B	604.089	-0.853333	0.255406	-3.34108	0.000834527	0.00628199	TRUE	DOWN	YDL133C-A_mRNA
RPS24A	217.522	-1.33565	0.248756	-5.36935	7.90231e-08	2.57987e-06	TRUE	DOWN	YER074W		RPS26A	128.523	-0.858948	0.310741	-2.7642	0.00570634	0.0288135	TRUE	DOWN	YGL189C_mRNA
RPL36A	36.5733	-1.3509	0.4182	-3.23028	0.00123668	0.0092751	TRUE	DOWN	YMR194W		RPL14A	68.7684	-0.863221	0.326458	-2.6442	0.00818845	0.0386432	TRUE	DOWN	YKL006W_mRNA
PHO88	34.7457	-1.35706	0.378449	-3.58585	0.000335984	0.00313397	TRUE	DOWN	YBR106W		RPL32	153.433	-0.86444	0.265894	-3.25108	0.00114969	0.00792514	TRUE	DOWN	YBL092W_mRNA
RPL27A	173.476	-1.36306	0.29221	-4.66465	3.09137e-06	5.42055e-05	TRUE	DOWN	YHR010W		RPS30A	91.8511	-0.926676	0.307164	-3.01688	0.00255392	0.0151385	TRUE	DOWN	YLR287C-A_mRNA
LYS20	21.8934	-1.36957	0.48239	-2.83913	0.00452372	0.0245892	TRUE	DOWN	YDL182W		RPL33B	105.711	-0.937817	0.28394	-3.30287	0.000957008	0.00679015	TRUE	DOWN	YOR234C_mRNA
RPS13	158.73	-1.39319	0.272588	-5.11099	3.2048e-07	8.4115e-06	TRUE	DOWN	YDR064W		RPS14B	73.8546	-0.964427	0.299899	-3.21584	0.00130063	0.00881697	TRUE	DOWN	YJL191W_mRNA
RPL17A	43.6332	-1.42465	0.439611	-3.24072	0.0011923	0.00919064	TRUE	DOWN	YKL180W		ARO2	43.6183	-0.975552	0.371542	-2.62568	0.00864752	0.039966	TRUE	DOWN	YGL148W_mRNA
COF1	52.6993	-1.42564	0.350889	-4.06292	4.84621e-05	0.000591131	TRUE	DOWN	YLL050C		HHF2	76.5568	-0.98047	0.318613	-3.07731	0.00208881	0.01301	TRUE	DOWN	YNL030W_mRNA
HOM2	33.5376	-1.44158	0.404829	-3.56095	0.000369514	0.00336197	TRUE	DOWN	YDR158W		RPL36A	66.1127	-0.984167	0.331037	-2.97298	0.00294926	0.0168314	TRUE	DOWN	YMR194W_mRNA
RPL37A	119.219	-1.4491	0.318171	-4.55448	5.25153e-06	8.7003e-05	TRUE	DOWN	YLR185W		RPS18A	122.268	-0.999212	0.298655	-3.34571	0.000820726	0.00624019	TRUE	DOWN	YDR450W_mRNA
RPL29	63.7663	-1.47181	0.362853	-4.05622	4.98729e-05	0.000601727	TRUE	DOWN	YFR032C-A		RPL1A	69.0655	-1.00766	0.357966	-2.81497	0.00487822	0.0248364	TRUE	DOWN	YPL220W_mRNA
TRX1	54.1641	-1.48331	0.326047	-4.54936	5.38095e-06	8.78361e-05	TRUE	DOWN	YLR043C		VMA3	65.7498	-1.00866	0.339263	-2.9731	0.00294805	0.0168314	TRUE	DOWN	YEL027W_mRNA
RPS20	114.283	-1.49722	0.325365	-4.60167	4.19123e-06	7.04889e-05	TRUE	DOWN	YHL015W		RPS18B	109.761	-1.0287	0.288354	-3.5675	0.000360406	0.00320448	TRUE	DOWN	YML026C_mRNA
RPS22A	132.216	-1.49914	0.30677	-4.88686	1.02458e-06	2.27457e-05	TRUE	DOWN	YJL190C		RPL12A	77.9126	-1.0479	0.321788	-3.2565	0.00112797	0.00781929	TRUE	DOWN	YEL054C_mRNA
NOP15	11.2894	-1.54352	0.599038	-2.57667	0.00997571	0.0471193	TRUE	DOWN	YNL110C		RPL34A	94.958	-1.06507	0.2863	-3.72011	0.000199139	0.00190893	TRUE	DOWN	YER056C-A_mRNA
[truncated: 2,749 more rows]
